# Supplementary material for: Evolutionary tuning of molecular charge state of UBP24 shapes eukaryotic responses to high temperature
Source: Research Square preprint supplement (doi:10.21203/rs.3.rs-7157930/v1), 2025-11-11
Supplement: Supplementary file 1 [file 0b2e9fb4d4f736affed3163d.xlsx]

## Sheet: Sup. Data 3a
Supplementary Data 3a. Selected 100 Arabidopsis thaliana UBP24 orthologs in eukaryotes.
Accession	Description	Organism	Length	Score(Bits)	Identities(%)	Positives(%)	E score	Sequence
Q9FPS3	Ubiquitin carboxyl-terminal hydrolase 24 OS=Arabidopsis thaliana OX=3702 GN=UBP24 PE=1 SV=1	Arabidopsis thaliana	551	2797	100	100	0	MSEKKVFVFGSFTEHETRSFFEQKPTKDPQNSKDKCVGSIQFGSLNLAAENSSVNTNGELKKGEADGTVKSAGSQERLDASRPASSDKNNDSDAKLPRKNSLRVPEHVVQNGIIKEISESNKSLNNGVAVKTDPIGLDNLSMSDGESDPVYKASSSKFQALDNEDFSSDSSSGSIQRKKNLKVPTESVPPVKDFTPRGLINAGNLCFLNATLQALLSCSPFVQLLQKIQLQDIPKADSPTLAAFSEFISELDVPSSSSIRNNVTVVEAGRPFRPAMFEGVLRNFTPDVLNNMSGRPRQEDAQEFLSFIMDQMHDELLKLKEQSPKVTASKSSVISSANDDGDEWETVGPKNKSAVTRTQSFVPSELSEIFGGQLKSVVKAKGTKASATVQPYLLLHLDI…
D7MBK9	Ubiquitin carboxyl-terminal hydrolase OS=Arabidopsis lyrata subsp. lyrata OX=81972 GN=UBP24 PE=3 SV=1	Arabidopsis lyrata subsp. lyrata	550	2658	95.5	97.3	0	MSEKKLFVFGSFTEHETRSFLEQKPTKDPQNHKDKCVGSIQFGSLNLVAENSSVNTNGELKKGQADGTVKSAGSQERLDASRPDSSNKIDDNDAKLPRKSSSRVPEHVVENGIIKEISESKSLNNGVAVKTDPIGLDKLCMSDGESDPVYKASSSKFQALDNEDFSSDSSSGSIQRKKNQKVPTESVPPVKDFTPRGLINAGNLCFLNATLQALLSCSPFVQLLQRIQLQDIPKADSPTLAAFSEFISELDVPSSSSIRNNVTVVEAGRPFRPAMFEGVLRNFTPDVLNNMSGRPRQEDAQEFLSFIMDQMHDELLKLKEQSPKVTASKSSVISSANDDDDEWETVGPKNKSAVTRTQSFVPSELSEIFGGQLKSVVKAKGTKASATVQPYLLLHLDIH…
R0F459	Ubiquitin carboxyl-terminal hydrolase OS=Capsella rubella OX=81985 GN=CARUB_v10004326mg PE=3 SV=1	Capsella rubella	551	2374	86.6	91.7	0	MSEKKVFVFGSFTEHETRSFLEQKPVKNPQNHKDKSVGSIQFGSLNLVAENSSANTNGELKKGQAVGTVKSRPTSSQKRLDASIPVSSDKIDDNDATLPRKYSPRVPEHVGENGIMKEVSERKSLNNGVVVKTDPIGVDKLCMSDGETDSLYKASSSKFQALDSENFSSDSSSGSIPSKKHQMVPTESVPPVKDFTPRGLINAGNLCFLNATLQALLSCSPFVQLLQGIQLQNVPKAESPTLAAFSEFISELDVPSSSSIRNNVTVVEAGRSFTPAMFEGVLRKFTPDVLNNMSGRPRQEDAQEFLSFIMDQMHDELLKLREQSPKITALKSSVVSLPNEDDEWETVGPKNKSAVTRTQSFVPSELSDIFGGQLKSVVKAQGSKASATVQPYLLLHLDI…
V4MMR4	Ubiquitin carboxyl-terminal hydrolase OS=Eutrema salsugineum OX=72664 GN=EUTSA_v10025311mg PE=3 SV=1	Eutrema salsugineum	418	1778	84.8	89.6	0	MKIDPTSFDNLCVSDGEGDSLFKASSSKFQALDSEILSSDSSSGSIPRKDNQMVATESLPPIKDFTPRGLINAGNLCFLNATLQALLSCSPFVQLLQGIQLQNIPKAESPTLAAFSEFISELDVPSSSSFRNNVAVVEYGRPFTPAMFEGVLRNFTPDVLNNMSGRPRQEDAQEFLSFIMDQMHDELLKLREQSTSSKSSVVSSANDDDEWETVGPKNKSAVTRTQSVVPTELSAIFGGELRSVVKAQGNKDSATVQPYLLLHLDIHPEAVTTIEDALHLFSAPEDLEGYRASVTGKAGVVSARKSIKIQKLSKIMILHLMRFSYGSQGSTKLHKPVHFPLELNLGRYLLVSPSNKGLKYELVATVTHHGRDPSKGHYTTDARRKNGQWLRFDDASVTA…
A0A8X7VXW3	Ubiquitin carboxyl-terminal hydrolase OS=Brassica carinata OX=52824 GN=Bca52824_012664 PE=3 SV=1	Brassica carinata	566	2115	78	83.1	0	MSDKKVFVFGSFTEHETRSLLEHKPINAPQSHKEKSVGSIQFGSFNLVSENSPVNSANGELTNGGQADVAVKSRPSSSHKEDKKCQSAASQRRVDASRPPSSDKINDNAAKLSGKHSSGEHVKENGIIKEVSERKPPLNNGVAEKAAAPIGLEKLCVSDGESDSLCIASSSKFQALDTDIFSNDSSSGTTIPRKNSQMAPTESVPAMKDFTPRGLINAGNLCFLNATLQALLSCSPFVQLLQGIQLQNIPKADSPTLAAFSEFISELDVPSSSSFRNNVAVIESGRPFTPAMFEGVLRNFTPDVLNNMSGRPRQEDAQEFLSFIMDQMHDELLKLRIESPKPTAPKSSVVSSANDDDEWETVGPKNKSAVTRTQSFVPSELSDIFGGQLRSVVKAKGNK…
A0A078GSP3	Ubiquitin carboxyl-terminal hydrolase OS=Brassica napus OX=3708 GN=BnaA01g06250D PE=3 SV=1	Brassica napus	590	2085	75.8	81.7	0	MLVATWLLYSSYSLRLNVFVFGSFTEHETRSLLEQQKPIKAPQNHKEKSVGSIQFGSFNLVTGSSPVNTNGELKKAQAADGVVKSRPSSSHKEDSAVSQKRVDAPRPSSSHKEDRSIQSAVSQKRLDASRPSSSDKVAKLPVKHSSGVPEHVVENGTIKEVSERKPLNNGVAVKASLEKLCVSDGESDALYKATSSKFQALDSEIFSSDSSPASIPRKNNQMVHTEPAPPLKDFTPRGLINAGNLCFLNATLQALLSCSPFVQLLQGIQLQDIPKAESPTLAAFSEFISELDAPSSSSFRNNVTVVESGRPFTPAMFETVLRNFTPDVLNNMSGRPRQEDAQEFLSFIMDQMHDELLKLRDESPRLTGSKSSVLSSASDDDEWETVGPKNKSAVTRTQS…
A0A0D3BM43	Ubiquitin carboxyl-terminal hydrolase OS=Brassica oleracea var. oleracea OX=109376 GN=106336319 PE=3 SV=1	Brassica oleracea var. oleracea	585	2095	75	80.6	0	MSDKKVFVFGSFTEHETRSLLEQKPINPPQSHKEKSVKSIQFGSFNPVAENSPVNSANGELKKGQTDEAVKSRPSSSRKEDTSFQSALTQRSLDASRPSSSHKEDKSFQSAESQKRLGASRPSSSDKINDNAAKKLSGEHVEENGIIKEVSERKPPLNNGVAEKAADPIGLEKLCVSDGESDSLCIASSSKFQALDTDIFSNDSSSGTTIPRKNSQMVPTESIPPMKDFTPRGLINAGNLCFLNATLQALLSCSPFVQLLQGIQLQNIPKAESPTLAAFSEFISELDVPSSSSFRNNVAVVESGRPFTPAMFERVLRNFTPDVLNNMSGRPRQEDAQEFLSFIMDQMHDELLKLREVSPKLTASKSSVVSSANEDDEWETVGPKNKSAVTRTQSFVPSQ…
B9GWK0	Ubiquitin carboxyl-terminal hydrolase OS=Populus trichocarpa OX=3694 GN=POPTR_003G202800 PE=3 SV=2	Populus trichocarpa	543	1488	58.6	69.5	0	MSDSKKVLVFGSFTEDETKSLLGKQSPGKVEKPVEKIELRFGSLNFGTGITFGNFDTTLNTQLASANGNVTSQSKSLVMKEKDVKVAKEGDGVLGSPRENGSIGNSNHGSSLSNGVDVLKTESIDLTSLHLSEKEDGPASPLQSSSFHVLDSEGIKDGDHDGTTNDSSIHVRKEDVWKANDGPLPAVKSLLPRGLINTGNLCFLNATLQALLSCSPFVQLLQELRIRDIPKVGFPTLTAFSEFVCDFDMPTSSNLKKDAVETGRPFRPAMFEAVLKNFTPDVPNSISGRPRQEDAQEFLSFIMHQMHDELLKLEGQSSGTNGFKTSVVSSTEEDEWETVGPKNKSAVTRTQSFIPSELSDIFGGQLRSVVKARGNKASATVQPFLLLHLDIHLEVVRTI…
A0A2C9W340	Ubiquitin carboxyl-terminal hydrolase OS=Manihot esculenta OX=3983 GN=MANES_04G163700 PE=3 SV=1	Manihot esculenta	546	1506	58.3	71.2	0	MTDNKVLVFGSFTEDETKSWLQKPSTENHEKPVEKKELQFGSLNFATGITFGDFNSESSRKPGSANGKASFQTSNPVNKEKDVKIAQKVHDFPGVLGSLKQNGSIDNFTQDISLNNGVKDLKKESIDLTSLHISKNEEGSRNQSRSSNFDVLHSEDVRDENMEGTNYDSPVYVKREDIQKQKDEPVAAAKIHLPCGLINSGNLCFLNASLQALLSCSPFVRLLQDLRIRNIPKVGFPTLTAFAEFVSNFDIPSGFSLKKDTTVVETGRPFSPAMFEGVLKNFTPDVPHSISGRPRQEDAQEFLSFIMDQMHDELLKFEGQSVGVNGAKSALVSSTEDDEWETVGAKNKSAVTRTQSFIPSELSDIFGGQFKSVVKARGNKASATVQPFLLLHLDIYHEA…
A0A5N5NDK2	Ubiquitin carboxyl-terminal hydrolase OS=Salix brachista OX=2182728 GN=DKX38_005131 PE=3 SV=1	Salix brachista	543	1487	58.3	69.3	0	MSDSKKVLLFGSFTEDETKSLLGKQSPGKVKKPVEKTELRFGSLNFGTGITFGNFDTTLNTQLDSANGNVTFHSKSSVKREKDVKVSNKGDGVLGSPRENGSIGNSSHGSLPNNGVDVLKTESIDVTSLHLSEKEDGPASPLQNSTYHVPDNEDIMDGDQDGTSNNSSIHVRKKDVWKATDGPLPAVKSLLPRGLINTGNLCFLNATLQALLSCSPFVELLQELRIRDIPKVGFPTLTAFAEFISDFDMPTSSNLKKDAVETGRPFRPAMFESVLKNFTPDVPNSISGRPRQEDAQEFLSFIMDQMHDELLKLEGQSSGTNGFKTSTVSSTEEDEWETVGPKNKSAVTRTQSIIPSELSDIFGGQLRSVVKARGNKASATVQPFLLLHLDIHLEVVRTI…
A0A2P6S8I5	Ubiquitin carboxyl-terminal hydrolase OS=Rosa chinensis OX=74649 GN=RchiOBHm_Chr1g0319451 PE=3 SV=1	Rosa chinensis	545	1478	58.3	69.2	0	MTDSKLFIFGSFSEDETKSLLLKQSPGKPSPVKGEKPVETNVLQFGSINFVTDKSLVELNGGSSRQQSCLKGPSKLQSLNADNKHNEVKTAKAGDDNLLGSVAIPTQNGCADHHSHSSTHSNGVKEVTTDDIDLSSSHLSQNEGGFSNQFSSLNLQGREQNGSVGDLSVSDSKGELQKSLNGPATVCTILLPRGLINSGNLCFLNATLQALLSCSPFVQLLHELRTRNIPKIGYPTLCAFAEFVSEFDVPSSSSKNKDTSVVEAGRPLSPAMFEGVLKAFTPDVPSTISGRPRQEDAQEFLSFIMDQMHDELLKLEGQSSCLNGGKSSLVSSAEDDEWETVGPKNTSAVTRTQSFVPSELSDIFGGQLRSVVKARGNKASATVQPYLLLHLDINPEAVR…
A0A498JDN9	Ubiquitin carboxyl-terminal hydrolase OS=Malus domestica OX=3750 GN=DVH24_016036 PE=3 SV=1	Malus domestica	540	1461	57.9	68.8	0	MSDSKLLVFGSFSEDETRSLLLKQSPGKAEKPVEKNVLQFGSINFVSPKSSGEFNGESSGQKSSLKAPTKSQPLSSLNKQNEVKAVTAADNNLPASTATPTENGCTDNYVNVSAHSNGVKEVTTDNVFLTSLPVSKDEGGLSNQFSSLELQNREQNGCVDDLSVSKIKGELQKASNAPVTVSKILLPRGLINSGNLCFLNATLQALLSCFPFVQLLQELRTLEVPKVDFPTLSAFAEFVSEFDMPSGSSSKNKDASVLETGRPFSPAMFEGVLKNFTPDVPTNISGRPRQEDAQEFLSFIMDQMHDELLKREGQSPSINGCKSTLISSAEDDEWETVGPKNTSAVTRTQSFVPSELSDIFGGQLKSVVKARGNKASATVQPYLLLHLDIHPEAVRTIED…
A0A7J7CHU0	Ubiquitin carboxyl-terminal hydrolase OS=Tripterygium wilfordii OX=458696 GN=HS088_TW16G00060 PE=3 SV=1	Tripterygium wilfordii	542	1469	57.8	71.1	0	MSNPKVLLFGSFTEDETRSWQHKPPSGNDEKPVEKKELQFGSLDFASGISLSGLNCDSKKQLGHANDTIDFEPTKALIEDDKVRTADLENDHLPGSFETLKINGDLDNCDHESLTDGIGDWFDSNSLSPSQRESSEHNHSQSSKFHVLDGEKMKDLDQNGTTDVSAVPLAKGVWKATNGLDAAVRNLLPRGLINSGNLCFLNATLQALLSCTPFVELLQEIRAHNVPKVGYPTLAAFAEFISDFDVPSGLSLKKKDSIVLETGRPFSPSMFEIVLKSFTPDVPNSMSGRPRQEDAQEFLSFLMDQMHDELLKLDGQSSGIQGSKSSLVSSSEDDEWETVGPKNKSAVTRSQSFIPSELSDIFGGQLRSVVKARGNKASATVQPYLLLHLDIYPEAVRTI…
A0A0D2UFG1	Ubiquitin carboxyl-terminal hydrolase OS=Gossypium raimondii OX=29730 GN=B456_010G192300 PE=3 SV=1	Gossypium raimondii	548	1492	57.7	70.1	0	MTDSKVFVFGSFTEDETRSLLSKQSSGNSEKPVATKELQFGSFNFAAGGSLGSVNGNLSNKPSSTNEPIEFLSSTSRIEDGKSRKTTTDHSLNALQTPKEAGSANSSSSSCSLSNGVKQLNAKGIDVTSVHLTINELNPLSDSQSSKFHVLESEIIEDRDQNGTVDTSLGGSIRGDIAKEEKDPIKVVKNLVPRGLINSGNLCFLNSTLQALLSCSPFVQLLQQLKLRNIPKVGYPILTSFAEFVSDFDVPSSDSKLKKKDTAVLEIGRPFSPVMFESVLKSFTPDVPNSISGRPRQEDAQEFLSFIMDQMHDELVKLQGQSGSSNGVRSSLVSYAEDDEWETVGPKNKSAVTRTQSFLPSELSDIFGGQLRSVVKAIGNKASATVQPFLLLHLDIHPE…
A0A6P5YYI0	Ubiquitin carboxyl-terminal hydrolase OS=Durio zibethinus OX=66656 GN=LOC111295850 PE=3 SV=1	Durio zibethinus	544	1471	57.7	69	0	MSDSKVLVFGSFTEDETRSLLLKRSAGNAEKPVEKKELQFGSLNFAAGGSLGSANGDLSNKPSSTNGLVGCLSSTSSIEDGKSRKTATDHSSTTLQTPKENGNTKSSTDGSGLSNGVKQLNAKSIDVTSLLLLQNEYGPLNYFQSLKLHVLESEKVEGRDKNGMIDISLVCTVQGDIQKAATIFKNLLPRGLINSGNLCFLNATLQALLSCSPFVQLLHQLRLCIIPKVGYPTLTAFAEFVSDFDVPSSDSNVTKKDTTVLEIGRPFSPGMFEAILKSFTPDVPNSISGRPRQEDAQEFLSFIMDQMHDELIKLQGQSSSSNGVRSSLVSSVEDDEWETVGPKNKSAVTRTQSFLPSELSDIFGGQLRSVVKARGNKASATVQPFLLLHLDIHPEAVHT…
A0A067GU61	Ubiquitin carboxyl-terminal hydrolase OS=Citrus sinensis OX=2711 GN=CISIN_1g008741mg PE=3 SV=1	Citrus sinensis	555	1464	57.2	68.8	0	MSDSKLFVFGSFTEEETRSWLQSQSSGSVKKPVSSRRAEKPAEDKELQFGSLNFGTESSLVGTTDEPNGKSVVDGPVVFQPSTLLKKDDKVKSVGASNDHDLGAVGCPKENGHIKNSTNGPALSNGVNHLKADGIDFSSFHQNAGGHANPSPISKFHVLCDGNIDGRDQNAAACNSSISGSKEVPMKAINEPVKSVKDLLPRGLINSGNLCFLNATLQALMSCSPFVQLLQELRTRDIPKAGYPTLTAFVGFVSDFDTPSGGSSKKKNISVLDIGRPFSPSMFEAVLKNFTPDVPNSISGRPRQEDAQEFLSFIMDQMHDELLKLQGESTSINGANTALVSLAEEDEWETVGPKNKSAVTRTQSFLPSALSDIFGGQLKSVVKAQGNKASATVQPFLLL…
A0A061FJS7	Ubiquitin carboxyl-terminal hydrolase OS=Theobroma cacao OX=3641 GN=TCM_042388 PE=3 SV=1	Theobroma cacao	548	1475	57.1	69.6	0	MTDSKVFLFGSFSEDETRSLLSKRSAGNAEKPVQKKELQSGSLNFAAGGSLGGANGDLSNKPSSTNRPVGFLSSTSPIADRKSIKSARDHTSTTLQTPKENGTTKSTNESSSLSNGIKQLNVKSTDVTSLHLSQNDCGSLNNFQSLKFHVLESESMEGRDQNGMIDISLACTVDGDIPKAAKEPITVAKNLLSRGLINTGNLCFLNATLQALLSCSPFVQLLQRLRLRNIPKVGFPTLTAFAEFVSDFDVPSSNPNVKKKDTTVLEIGRPFSPAMFEAVLKSFTPDVPNSISGRPRQEDAQEFLSFIMDQMHNELIKLDGQPSSSIGVRSSLVSSVEDDEWETVGPKNKSAITRTQSFLPSELSDIFGGQLRSVVKARGNKASATVQPFLLLHLDIHPE…
A0A8T1NHE6	Ubiquitin carboxyl-terminal hydrolase OS=Carya illinoinensis OX=32201 GN=CIPAW_14G005400 PE=3 SV=1	Carya illinoinensis	541	1444	56.9	69.2	0	MSDSKKLVVFGSFTEDETRSLLLKKSSKNAEKSVEKKELQFGSVNFVTLKVSGGLHGESSRELDSPQGSNSVLSSNTIKKDDEVQSVKIVNKHLPGVLRTPKENGSLDDSTHGSHINGAEEVNQDNIGSSSLLISQNQHHPSLPLSSLKLQNTEQNGGSMDSSFLAAKDDSMKAANGLVMSCRNLLPRGLINSGNLCFLNATLQALLSCSPFVQLLQDLRTHNIPMVGYPTLTAFAEFIAEFDMPNGSSLEKDIATLESGKPFRPDMFEDILKKFTPDVPSSISGRPRQEDAQEFLSSIMDQMHDELLKLEGQSSSINGNKLSLVSSAESDEWETVGRKNKSAVTRTQSFVPSKLSDIFGGQLRSLVKARGNKASATVQPFLLLHLDIHPEAVRTIEDA…
A0A6P3ZQP6	Ubiquitin carboxyl-terminal hydrolase OS=Ziziphus jujuba OX=326968 GN=LOC107417781 PE=3 SV=1	Ziziphus jujuba	541	1443	56.9	68.4	0	MSDSKLFVFGSFTEDETKSLLVKHASRDSKKPAEKKVLQFGSLNFVAEKSLDSFEGQSSTKQNNLEGKTQFQSSDFLTKNNEVKCVKTADDNSSGAFASPKENGYVSDSTHVSPGCNGVKEAVTDTVDLTSSLEFQKNDGLLNKFSHLELHHEEQNGSVDNLSVSLSDEELRKASNGPVKVCKNLLPRGLVNSGNLCFLNATLQALLSCSPFVQLLQEIQTQNIPKVGYPTLTAFVEFVSEFEMPLGGNSKKTETNILDVGMPFRPAMFEAVLKKFTPDVPSSISGRPRQEDAQEFLSFIMDQMHDELLKHEGQSSSIRGSKSSLVSSAEDDEWETVGRRNRSAVTRTQSFVPSELSAIFGGQLRSLVKARGTKASATVQPFLLLHLDIYPQAVCTIED…
A0A803LV78	Ubiquitin carboxyl-terminal hydrolase OS=Chenopodium quinoa OX=63459 PE=3 SV=1	Chenopodium quinoa	541	1388	56.9	68	0	MNNSEMILFGSFTEEELRSINNKPSENSKIPPRKEELQFGSLSLVTGAFLSSENGETGTKLPSSVKSSDSVKKVDGPVHLNDVVPVSRAVLKENGSIHSSEHSHPLANGLKQIKGGSHDLASACLTNNDATVSSQQFLSSSQGCQDIRLKERYSNGVHDASLKSVPLKDDLKKAANGSIATTCDLLPRGLINAGNLCFLNATLQALLSCSPFLKLLQELRTRDIPKVDYPTLIAFVDFVSEFDIPHGSSSKTRDPNIVDTGRPFSPAMFEDVVKNFTPDVPSGFSGRTRQEDAQEFLSFVMDQMHDELLKLGGQNSGMAARKSLLVSSSEDDEWETVGPKNKSAVTRTQSFVPSELSAIFGGQLKSVVKAKGNKASATIQPYLLLHLDIFPEAVHTIED…
A0AA88AMK5	Ubiquitin carboxyl-terminal hydrolase OS=Ficus carica OX=3494 GN=TIFTF001_022838 PE=3 SV=1	Ficus carica	532	1431	56.5	69.2	0	MLLLQRVLVFGSFTEDETRSLLRSRSSKNAENAMEKKVLQVGTVNLVLEKAFGGSNGTSSQDQKGKSQHDVALDSLKKDNEVKSAKAADVVPNLLKENGHAHVATPGFEGSNGVKEVPKDDVPATSISEFEGEDGLSNEFSSLKLLNGTAEGSSVPLSKEETKKASNEPDIADVNLLPHGLINSGNLCFLNATVQALLSCSPFVKLLLELRNQNIPKADHPTLTAFLDFVSEFDVPSGSNIRKKDTNLLDIGRSFKPVMFEGVLKNFTPDITCGISGRPRQEDAQEFLSFVMDRMHDELLKLEGQPWNSVGRKSSMVSSSEDDEWETVGPKNKSAVTRTQSFVPSKLSEIFGGQLRSVVKAKGNKASATVQPFLLLHLDIHPEAVHTIEDALKLFSAPE…
A0A8B7CJG6	Ubiquitin carboxyl-terminal hydrolase OS=Phoenix dactylifera OX=42345 GN=LOC103714682 PE=3 SV=1	Phoenix dactylifera	541	1368	56.3	67.4	0	MSDHKVLIFGSFTEDETRFFQRQLVENNVCPLEKAGSQFGSLDSASLNPSNGSNAEPKQTDSSVSSNDIQGSKLVSKDKRTKNEKAKISNNFKQDTGAQANGSPNSCISHDDGITENGSDTLDLASLQISDSEAANTELLSSPKVHQNGIQTPKYKSMLVGSSAVVNSVVDVPKISSEKAPSSERILPRGLINSGNLCFLNATLQALLSCSPFVQLLQDLRNRNIPKIGCPTLNAFVEFISDFDVPNDSSPKNNERGVLETGKPFSPIMFDPVLKKFTPDLPTGTLGRPRQEDAQEFLSFVMDQMHNELLKLDDHFSSSDGGKLPLVSYAEDDGWETVGPKNKSAVTRTQSFVPSELSAIFGGQLRSVVKATGNKASATVQPFLLLHLDIFSEAVHTIE…
A0A0R0H004	Ubiquitin carboxyl-terminal hydrolase OS=Glycine max OX=3847 GN=100816791 PE=3 SV=1	Glycine max	541	1418	56.1	68.2	0	MRRDISDSPFKMFVFGSFTEDETRSLLSKQSFGKKEKPVEKNQLQFGSLNSVTVESNNLLNSSKASYNAPPSDSRKCNGVKSAIDNSPEVSGTVKENGSITNISPRSTSTISVNEVEEKNVNFFTLRCEDGPLNKFTKLSLDASEAESLKNVHTTGSGDDSAPKLPDREPQKAPNGHAVMHVKDILPRGLINSGNLCFLNATMQALLSCSPFVHLLQQLRTCNLPKVGYPTLTAFAEFITQFDMPSITKLKKQDADTFESGRPFRPVMFEGVLKNFTPDVPNSISGRPRQEDAQEFLSFVMDQMHDELLKLEGQSSSLNGSKSSLVSSVEDDEWETVGPKNKSAVTRTQSFLPSELSGIFGGQLRSLVRAKGNRASATVQPYLLLHLDIYPDAVHTIED…
V7AH98	Ubiquitin carboxyl-terminal hydrolase OS=Phaseolus vulgaris OX=3885 GN=PHAVU_011G014600g PE=3 SV=1	Phaseolus vulgaris	530	1401	56	67.9	0	MLLFGSFTEDETRSLLSKQSSGNNEKSAEKNQLQFGSLNSVTVESNNLQNSSKASASALPSGSQKCNGVKNVSDNSSEVSGTIKENGSITNFSPSPMGIASVNEVEKKNVNCFTLLDEDGPSSKFTNLSLKDFETENLKNVQKIGSGDDSSLKFSCREPPKAPNGHTVLPVKDILPRGLINSGNLCFLNATVQALLSCSPFVHLLQQLRTRNLPKVGYPTLTAFSEFITQFDMPSTTIIRKQDTDTFESGRPFCPVMFEGVLKNFTPDVPNSVSGRPRQEDAQEFLSFVMDQMHDELLKLEGQSSSLNGTQFSFVSSVEDDEWETVGPKNKSAVTRTQSLAPSELSCIFGGQLQSMVKAKGNKPSATVQPYLLLHLDIYPDTVHTIEDALRLFSASEAL…
W9SIJ0	Ubiquitin carboxyl-terminal hydrolase OS=Morus notabilis OX=981085 GN=L484_008625 PE=3 SV=1	Morus notabilis	564	1396	55.9	68.1	0	MSSFDAFLFLSTSLGYQENIISFQSHSDSTGFVKLVFLFGSFTEDETKSLLRAQSSKNGEKAVEKKVLQFGSLNFDSEQSFGGPKSTDTSSTDQKGKPQHAKPLDSLKKDNVVKSAKTAQDVHNLPKENGHAHVATHGFQGSNGVKEFPKDNVGATFTPELDDEEDVSKNEFSSLKLLNGSAEDSSVPLSKEEPKKASIGPVIPAIHLLPHGLINSGNLCFVNATVQALLSCSPFVHLLLELRNQNLPKDGYPTLTAFVDFVSEFDMPIGSNLKKKDTNVLDIGKPFKPVMFEGVLKNFTPDISCGISGRPRQEDAQEFLSSVMDRMHDELLKLEGQRWTAVGSKSSVVSSSEEDEWETVGPKNKSAVTRTQSFVPSKLSEIFGGQLRSVVKAKGNRAS…
A0A1S2YL90	Ubiquitin carboxyl-terminal hydrolase OS=Cicer arietinum OX=3827 GN=LOC101504402 PE=3 SV=1	Cicer arietinum	535	1388	55.8	67.3	0	MSDSKVLLFGSFTEDETKSLRVKKSSGKNEKPVQKNQLQFGSLNSVTVESSNLPKSPKAPDSAPLPDSRKLNGENGVSANLPEESAILKQNGSIANFLPSPASITSANQVKENSVCSVTSINENGTENQFTNLSLDASEAESLKSEFKIGSGDDSSSKLFNKDLRKAPNGHAVTHVKDLQPRGLINSGNLCFLNATMQALLACSPFVQLLQELRTRNIPKVGYPTLKAFAEFITQFDMPSGIKLKTKDTDSFEFGRAFCPVIFEDVLKNFTPDVPNGISGRPRQEDAQEFLSFVMDQMHDELLKLEGQSSSLNGSKSSLISSVEDDEWETVGPKNKSAVTRTQSFVPSELSGIFGGQLRSLVKAKGNKGSATVQPYRLLHLDIYPDAVHTIEDALHLFS…
A0A9Q1QH07	Ubiquitin carboxyl-terminal hydrolase OS=Carnegiea gigantea OX=171969 GN=Cgig2_004463 PE=3 SV=1	Carnegiea gigantea	562	1392	55.6	63.8	0	MDTSKVILFGSFTEDELRSLQKKPSETSAIPANKKELQFGSLPLVTGEFLGGVNEVSGKKSAFSVKSTKLDEKNNLSTHLTDLFPASGGVPKENGSIHGSNHYSPLSNGVNEFKDGNVNLSSLSLLKSSQSVFSQQSSSLQQVSEAISSREMHSNGVCNESQLSLAAKHDGNKAANVSIASIKDLLPRGLINAGNLCFLNATVQALLSCSPFVQLLQELRNWDIPKVGYPTLIAFAEFIKEFDVPQGSSSKKKDLTVIETGRPFSPAMFEGVVKNFTPDVPSGFSGRMRQEDAQEFLSFVMDQMHDELLKLDGQLLSAAGRKLQLVSSAEDDEWETVGPKNKSAVTRTQSFVPSELSAIFGGQLRSVVKAKGNKASATVQPYLLLHLDIFPEAVHTIDD…
B9RGG1	ubiquitinyl hydrolase 1 OS=Ricinus communis OX=3988 GN=RCOM_1453740 PE=3 SV=1	Ricinus communis	605	1390	55.6	67	0	MQQNTKFTQKPKALNKPQIGFKIKLPVMQVRERRRGTASKTKAIGRRRVVVVVVVAGHGVVGGEEEKDSIFFNFLNCEMRRVGERERVVLVFGSFTEDETKSWQANKSSENDKKPVQKKELQFGSLNFATGITFGDFSSESSRQPGSTNGKVSFQSTNPHKKEKDVKIAINPEPSVLGSPKQNGSIADITHSVTLANGVKGLKTESLDLASLHLSQNEDSPINLSQSSNFHVLDSGAVKGGDLDGINNNSLVYVENENTRKPCDEPVAAALLSCSPFVQLLQNLRTRNIPKVGFPTLTAFAQFVSEFDMPSSSSLKKDTAIVETGRPFSPAMFEGVLKKFTPDVPNCISGRPRQEDAQEFLSFIMDQMHDELLKLEGQFACTNGAKSSLVSSTEDDEWE…
A0A1U7Z3C5	Ubiquitin carboxyl-terminal hydrolase OS=Nelumbo nucifera OX=4432 GN=LOC104589876 PE=3 SV=1	Nelumbo nucifera	545	1395	55.1	66.8	0	MSDSKVFIFGSFTEDEVRSFQRQASENTVQPLGKKDLRFGSLDFETVRSLGGLKCEPVQADSLKGSKDFQLPNMVVKDNAIKTVNAATNKLQRVSGSMKENGSIQNSSNFSPYCNGVKEHEGGCLDFPSLYISLDAGPPKQLTSPVDRNFLITSHSIPDEVLVNSSTLVASNDDIQKAVNQSSTFVKDLLPRGLINSGNLCFLNATLQALLSCSPFVQLLQELRTRDIPKTGYPTLCAFVEFISDFDMPTGSTLKKKEMSVVETGLPFRPAMFEPILKNFTPDVPNSISGRHRQEDAQEFLSFIMDQMHDELLKLEDQFSSSTTAKASLVSNVEEDGWETVGPKNRSSVTRTQSFIPSELSAIFGGQLRSVVKARGNKASATVQPFLLLHLDIFPEAVC…
D7SQ20	Ubiquitin carboxyl-terminal hydrolase OS=Vitis vinifera OX=29760 GN=VIT_13s0019g01690 PE=3 SV=1	Vitis vinifera	553	1396	54.9	68.7	0	MHKMSDSKLLLFGSFTEDETRSLLRLPSGNAEKPAAKKELQFGSVDFVTGRALASVGNELCRQADSSKGPIDFCSSNLLKKDDETKSVDGVNKLSSEAAGTPKENGGVHDFTHSSPLGNGVVNELNPDRFNLDSLCLSQNKEHLNQFQSLESHVVEEECSKERDLNGTIDDSSTFVPLKKEILKAPNGPAPAVKNLLPRGLINSGNLCFLNATLQALLSCTPFIQLLQELRIRDIPKVGYPTLTAFAEFVSEFDMPTDLSLKKKDLNGVETGRPFSPAMFEGVLKNFTPDVPNKISGRPRQEDAQEFLSFVMDQMHDELLKLEGFFSNLNGGKSSLVSSAEDDEWETVGPKNKSAVTRTQSFVPSELSKIFGGQLRSVVKARGNKASATVQPFLLLHLD…
A0A6A4NWK0	Ubiquitin carboxyl-terminal hydrolase OS=Lupinus albus OX=3870 GN=Lalb_Chr19g0140171 PE=3 SV=1	Lupinus albus	534	1392	54.9	67	0	MFLFGSFSEDETKSLLQKQSSGSGGKEKPAEKNQLQFGSLGLVTVDPSNLQKSPKAPESASPSDSQKCNGVNSASIGENLPGVSKTTKENGRITNFSPGPSSTITVSEVKENNVHPVTLLDEDGNSNHFSNLSLAVSGAESMNHAHKVGSGLDSLSKLPDQDSKKAPNGHIVTHSRDILPRGLINSGNLCFVNATMQALLSCSPFVQLLQELRTRNIPKVGYPTLTAFAEFITQFDLPSTTILKKKDTDTFETGRPFRPVMFEGVLKKFTPDVPNSMSGRPRQEDAQEFLSFVMDQMHDELLKLEGQSSSLTGSKSSLVSSVEDDEWETVGPKNKSAVTRIQSFVPSELSDIFGGQLRSLVRAKGNKPSATVQPYLLLHLDIHPDTVHTIEDAFHLFST…
A0A7J7HJV0	Ubiquitin carboxyl-terminal hydrolase OS=Camellia sinensis OX=4442 GN=HYC85_010465 PE=3 SV=1	Camellia sinensis	560	1383	54.6	68.1	0	MESQRRRKVPFLTILWVLLFGTFTEDETRSWLKQSSEKTEKHVEKKELEVGSSNVVTGLSFGGFNGEPSRQLDSSRGPIGSNPSDIHKDNKGKSAETTNNLLPVASESSNENGVIQKFDHSHPLSNGNEELRIADNVDIISLHVSDSEGGSPNQSPFSKLQALDGEISREVNLSGTNSSAAVPFEEFTRQASNGPVITVKDLLPRGLINSGNLCFLNATLQALLSCSPFIQLLQGLRSRNISKVGYPTLAAFAEFVADFDLPEDASLKKRDITVLETGRPFSPTIFEGVLKNFTPDVPNSFSGRPRQEDAQEFLSFVMDQMHDELLKLEGQLSSSNGGNSSLVSSVEDDEWETVGPKNKSAVTRTQNFVPSELSAIFGGQLRSVVKARGSKASATVQPF…
A0A6A6NF62	ubiquitinyl hydrolase 1 OS=Hevea brasiliensis OX=3981 GN=GH714_036929 PE=3 SV=1	Hevea brasiliensis	506	1369	54.3	67.5	0	MNSSKVLVFGSFTEDETRSWLQKPSSENDEKPVEKKELQFGSLSFATGITFGDFNSESSRQLGSANGKASFQTTNPLKKEKDVKIAQKVHDLLVVQGSPKQNGSIDNFTHGNTLNNGVKDFKMESVDLTSLHLSKREDSSRNQSQSSSFDVLDCEGVNDGNSGDTDNDPLALLSCSPFVQLLRDLRIRNIPKVGFPTLTAFAEFVSNFDMPSSSSMKKDIAIVESGRPFSPAMFEGVLKNFTPDMPYSISGRPRQEDAQEFLSFIMDQMHDELLEFEGHSASINGAKSTLVSSTEDDEWETVGPKNKSAVTRTQSFIPSELSDIFGGQLRSVVKARGNKASATVQPFLLLHLDIYPEAVHTIEDALHLFSAPENLEGYRTSAIGKAGAVTARKSVKIQT…
PLAZA - ATR0721G058		Amborella trichopoda	652	538	68.28	77	1e-177	MSCSAKNQVGLSQVLVFGSFSEDEMRLFQKKSLDHAVGPENNKQIQFGSLDYSSVCSFGTLTIDPQQSDPTRDIKRVEPSNLVTNTRTFENGKHKLVDNSIKKGENIQANGSSKAHIHGFPTADGEISKKSNNKSILQNRSGFPNANSTFSSEEKASSSVLDYSHGAQLSVLEKAVSTDMTHNKLASQGSIMKSSNGETVETVSKRSQVPVKGHMTSEVSDLDHSISAGENRHESGMQVANEAGEMASLDGNFQHGIEDGKSKNGDCLAIGNTIQEISFKGDPCKLMCEPGAAMKYLQRRGLLNMGNLCFLNATLQALLSCSHFVQLLQLLKTRNFPKVGYPTLHAFIDFISEFDMPADSSFKKNEKMLEAGRPFCPAMFEPVLKKFTPDVPPSISGRS…
A0A6P6VVD3	Ubiquitin carboxyl-terminal hydrolase OS=Coffea arabica OX=13443 GN=LOC113727232 PE=3 SV=1	Coffea arabica	548	1224	50.6	64.4	5.1e-160	MSDSKSKVLLFGSFTQDETQTMLNQSFSNSTRISKKKELQVDSASPVQELSFGSFGNDPGIQFGSVKAPVDSILSDLQRGNEGHGVNSVHKPMGGDLKENGSVDQSIHFYSNGNNESNKIDVLDFSVSCVSGNEDEAFHKSPTLKAQVLDGVDSKGAFSNGTISDSLDMKQFREALQRLPDGPFVASADLLPRGLINSGNLCFLNATLQALLSCSPFVQLFQELRICDVTKVGFPTLASFGLFINEFSLPSGVNAKRKDVSVIETGRAFCPAIFEVVLKNFTPDVPTSTVVRPRQEDAQEFLSFVMHQLHDELLKLEGQSSLNGGKSYVVSSAEDEEWETVGRKNKSAVTRTQNFVPSKLSSIFGGQLQSVVRARGNKASATVQPFLLLHLDISHEAVR…
UPI0024148ADA		Cryptomeria japonica	612	460	44.96	100	1e-155	MMDASQVFIFGSFSEDEASFFQKDIVEEDTKLFKQNDLLFGSFDSQVECLQKNPEISSKQACNGEVKVSDHLRSNVKSHIPNDQENLVSNRGRTGEQSTKKQAVSGSCDTKVAAANGGDTYSMKLESSGECTIVENGAGKMTDRTKSLQEFLVESSSSLVGSDTIQRLDSLSLESIDSVEESMEYPSLMSENIPMSWAAKFGGKEGNGQVAYSHGGDKSRKKSGVVSTIPKLSQGKSSTSLIENVGSISASGMGVMMKRWQPRGLKNAGNLCFLNATLQALLSCAPFFQLLQILRSRDIPEVGYPTLRAFVQFLDEIQEEKPADSVLERNEQEIGWLESGKPFYPTMFDPVLKLFSPDQPLSSLGRPRQEDAQEFLLFVMDRMHGELLQLDGSNSSMIT…
A0A1D6IME8	Ubiquitin carboxyl-terminal hydrolase OS=Zea mays OX=4577 GN=ZEAMMB73_Zm00001d022414 PE=1 SV=1	Zea mays	552	1186	49.6	61.8	3.2e-154	MSSGGEKMLLFGSFTEDETKLLQGQPLKSPTKSVSKECERTEIQFGTLNLSVLNLEKISTSSVVLPAKSAKGETSAITKENACNNEKKAAGSSLSNGGPVLANGCPPVNVPANNGLFENVKTEAVVPPVIPVKIISNPTPQMTLETHKDGTKPTESRKLNKEREITENGSPIVDKHIVAAPAEEAVTSLNKKASQNMPLLPHGLRNTGNICFLNATLQALLSCSPFVYLLQDLRNRRIPKVGYPTLSAFVELISQLDVPDESVIKKNEKVITVAAKPLNPAMFDAVLRNFTPDVPAGITARPRQEDAQEFLSFAMDRMHDELLKLNGDGLNSKEGMVVSSADDDAWETVGRKNKSAIVRTQSFVPSELSAIFGGQLQSVVKAAGNKASATVQPFLLLHL…
A0A9R1WH67	USP domain-containing protein OS=Lactuca sativa OX=4236 GN=LSAT_V11C100038970 PE=3 SV=1	Lactuca sativa	492	1156	49	62.2	1.5e-150	MADQPQVLLFGSFSEDEVKSWLNKPSKNTEKPVKNKTLDLDSLKISSGISFGSFNGEAISNQKPEALVHPKENGVQHGNNGNMKQKPVENINHCSSNIPSKNTPAYVVQNQIQSFVGVKEETLNNTFNGHLKDSEICLLPRGLVNLGNMCFLNATLQALLSCSPVIQLFQGISTRNIHKTGYPTLAAFMEFISEFKMPAGTISKDMNNLQTGRPFSPTMFEVVLKNFTPDVPNSISGRPRQEDAQEFLSFIMHQMHDELLKLEGQYSSTANGNGSSLVSSVEDDDWETVGPKNKSAVTRTQNFAPSELSAIFGGQLRSVVKARGNKASATVQPFLLLHLDISHEGVATIEDALRLYSIPETLDEYRTTSGKAGVVTARKSVNLQTLPKIMILHLKRFGY…
A0AA38L8D4	Ubiquitin carboxyl-terminal hydrolase (Fragment) OS=Taxus chinensis OX=29808 GN=KI387_024230 PE=3 SV=1	Taxus chinensis	586	440	58.18	68	3e-148	MKSFKQNDLQFGSFDSQVDCLHRSPEISSKLECNGKVTEKDFQRLNVKSYTSNDQEHFVPNGVRTDEQSTKKHDCCSSDAKVATANGGDGYSEFSMKLESSGEGAIVENGEDKITNRTISVQELLVESSSNFTGGDSIQQHDSISLENNDAVEESVEDPTSLTVNVPMSWAARFVGKAGNGQFANSHGGDKGRQKPGVVSATLKTSQDKSSSSLLKNVSSIASCETEIAMKIWQPRGLVNAGNLCFLNATLQALLSCAPFFQLLQTLRSRDIPEVGYPTLRAFVELLDEIEENKPADAVLEKKVHVIGRFEAVKPFRPAMFDPVLMNFSPDQPLSSSGRPRQEDAQEFLLFVMDRMHGELLQLDGRNLNGSGGSNSSMVIVSGDDDWETVGPKNRSAVT…
A0A3B6AUA8	Ubiquitin carboxyl-terminal hydrolase OS=Triticum aestivum OX=4565 GN=CFC21_015622 PE=3 SV=1	Triticum aestivum	700	1122	48.4	62.4	1.3e-142	MSGADKVVLFGSFTEDETKLFQGQPAKSEEKSWELPEIQFGSLNFSVLSLEKASNAITEGSAHSPKPTYGHTKDHAGSNKKETVTSTLPNGGPVLFNGFPAEVSPNNGILKNVKSEASVPSAGPVSNLKENKATVALAGPVNNVKKTEAQVPSARPVNDVKKNEALALSPGPINNVKKDATVPSAGPVNNVKKDAAVPSAGPVNNVKKAKATAPSAGPANNVKKAEATPPSALSANNVKKAEPTVPSARPVNNEKKAEATVPSPGPANTVKKTESVVPSVAPIKSISSSTPIEGPGPHHDGLRCTESSSSAMLVTENGSTGADAPIIAAPADDSVTSLNKEDYQNKPLLPHGLKNTGNICFLNATLQAFLSCFPFVQLVQGLRNRSIPKAGYPTLSAFI…
Q0D3X3	Ubiquitin carboxyl-terminal hydrolase (Fragment) OS=Oryza sativa subsp. japonica OX=39947 GN=Os07g0661300 PE=1 SV=1	Oryza sativa subsp. japonica	489	1086	52.2	64.5	4.8e-140	LSDGQNKIIITKDIACSNKKETVAPTLPNGKPVLFNGSPTANANVSPNNGVIENNQKAVAAVLTSVPAKNVSSPAPLSVPEVDHDGIERNQNSSLVPEITENGGPAIDTPTTAAPVDELVTSLNKKDFRNKPLLPHGLKNTGNICFLNSSLQALLSCWPFVQLLQNLRNQNIPKAGYPTLNAFIEFISQFDVLDDSNVKKDEKFATIASKSVIPSMFDTVLRNFTPDVPAGTASRPRQEDAQEFLSFAMDRMHDELVKLNGNGSNSKEGMIVSSNDDDAWETVGKKNKSAIMRSQSFVPSELTAIFGGQLQSCVKATGNKASVTVQPFRLIHLDIFPDAVQKLDDALRLFAAPESLEGYRTAAGKAGLVTARKSVKIHSLSKIMILHLKRFSYGSHGCT…
A0A8T2REG6	Ubiquitin carboxyl-terminal hydrolase OS=Ceratopteris richardii OX=49495 GN=KP509_28G047700 PE=3 SV=1	Ceratopteris richardii	593	416	41.55	99	8e-139	MSTADKQVFVFGSFSEEEASHFQFTPQLFVKKNAHTGDCANFNKTKLSKDQFVLNESHLKAVISSNGDSKQEGSSSLALNVVSMASNDEASCNGGTIGSSENVPKENGSLCDKAISVNEINGNVFDSSSELEHGVGLVGSPSLHAADPCSPQFGTDNRKVEFVDESSVSSGKIASKTWASLLDQEASKKISLKESNEANRLTQKEQTAVLVTDLSGNSWLSSLKHAEVTGKRLQPRGLVNKGNLCFLNATLQALLSCSSFIHLLHVLQERGVPKTGFPTISAYVDFFKEFELQPKAEKQADKPPSDVGRPFVPSMFDDILHQFNPQQPATRAPRSRQEDAQEFLIFAMDRLHDELLRLDGNEENIADAKNIAVQAANEDDDWETVGPKNRTALVRTHAF…
B8B5K0	Ubiquitin carboxyl-terminal hydrolase OS=Oryza sativa subsp. indica OX=39946 GN=OsI_27205 PE=3 SV=1	Oryza sativa subsp. indica	737	1078	47.3	60.6	1.4e-135	MGSSKANHPAASSSKVSSVSSSKPKPKPTPIRNPTPPPPPPRRRTPPPPPPGSGPGPQRPSYLSVALRRRGPPAGSAAGTPAPPRAAAAFDVAPPVAEHTDPVVFPASLAEMSGGGGSSSSDDQILLFGSFTEAETKLWQPNANKTRELSEIQFGSLNFSALNLSKESNSITQGAVYPAKLSDGQNKIIITKDIACSNKKETVAPTLPNGKPVLFNGSPTANANVSPNNGVIENNQKAVAAVLTSVPAKNVSSPAPLSVPEVDHDGIERNQNSSLVPEITENGGPAIDTPTTAAPVDELVTSLNKKDFRNKPLLPHGLKNTGNICFLNSSLQALLSCWPFVQLLQNLRNQNIPKAGYPTLNAFIEFISQFDVLDDSNVKKDEKFATIASKSVIPSMFDT…
UPI00219FEE83		Adiantum capillus-veneris	593	398	55.71	64	2e-132	MDNLVFVFGSFTEDEASHFQFSSESPTSKDRQGGTVSGSESSESEKKIWDGLNGSNKTKSAIIGTRNGDLKQGKGADLAIHLTSSESKEEEFTVSHNGGTTISTNKHHLGNGNLSNKEVMKTEALDRVDGNRDTSTVDHDLKHEELHVDSTAITPCAGTPCGTVDFNNESVVSPAKVISKTWAALLDDEAIGSPQVQDSKGDESINLKDNGPMQLTELSGDLWLQSLKGAEVDGNRLQPRGLVNNGNLCFLNATLQALLSCSPFVHLLRTLQARGVPAVGYPTLCACVEFFREFEFQQPHDRNAKVSFNAGKPFVPSMFDKILHQFNPNQPSTGVARSRQEDAQEFLTFTMDRFHDELLRLDGRKQTGNGTASEASEEDDWETVGPKNRTAVIRTHTFC…
UPI00270FB240		Adiantum nelumboides	597	393	54.57	65	7e-130	MDNQVFVFGSFSEDEASHFQFISESPTSKDQQSGPLSGCDSSELEKKKLDGLNGSNNILSEITATSNGFLKQGTHADLGIDFISIESGKEAFTVPCNGDTAISTNKHHVRNGCSSNEAEMTIEPLERVVGMTSLSTVNLDLRHEGLLFESNASTPCVGTPRGRVGFNNETLVSPAKGIGKTWAAMLDDEGIESPQAQGSKTGEGISLEDNRPMQVIELSGDLWLQSLKEAEVAGKRLQPRGLVNNGNLCFLNATLQALLSCSLFVHLLHTLQARGVPVVGYPTLRACVDFFREFELQQPHDRNAKISLNAGKPFVPSMFDIILHQFNPHQPSTGVARSRQEDAQEFLTFTMDRFHDELLCLDGKRENLAGAGDGVAPEANQEDDWETVGPKNRTAVVRT…
UPI0024D58279		Diphasiastrum complanatum	595	388	53.62	65	3e-128	MTDSQVILFGSFSEDEAKALQSSPSDNYGTNSPAISPNKGVLTVSRQQELFQGPAASISSNQQVVVLTSKRVTRGSQCKFPEVGSELPLRILQNENGGSLPEKDPPYQAFSFGKDILSEPSEEKVTEDSSLEEKIRSQKEIDMEFNATKPATSNGQIEDAFLHGQEQVSGDMFHSDRLEKCTMEISIAGIGIAIKDSGNGKKYEESLKETPEGGASKVNFSKGLQSFGRRLQPRGLMNTGNSCFLNATLQALLSCSPFWHLVQSLRTSNTLQMGYPTLRAMIDFVGEFESVPVPEKFLAKGGGEEESGYGEGIEIGRPFAPTMFEPVLRSFNPDTCGALRKSRQEDAQEFLSYLMDQMHEELLQLTSVGLKQSDPSKTSDEDEWETVGPKNRTAITRVY…
A0A2R6XSJ9	Ubiquitin carboxyl-terminal hydrolase OS=Marchantia polymorpha OX=3197 GN=MARPO_0004s0306 PE=3 SV=1	Marchantia polymorpha	691	1010	48.2	65	5.7e-126	MTEPVFLFGSFTEDEAQQLQASVPESPSPKGSHRSLKPALKENGFHSAHNHPSELKIAPKAAPSKVAAAAQNGLSPAPKSVSKPNSSIVGNGKQPESANAPSRIAGRGVKKQVLSPAVGLGPQKGGKQVDAKSSAANNHIAENPLKRIVNNGAADLGYHAGRTPSSSQDFSVANGQGPPRAVVTPLNQNGTVSGKLGTKEEAVITSSVSSQLAIAPKSILGSDENSAKSSQGKEGSDLVRIRTTSDSESDGVASEFMPKSWAALVSVPTDSADMDGASGSLRRKPKDAQKRQPVSPQSQVPAVTVLSGDIWLKSLRKADTAGRRLLPRGLVNTGNSCFLNSTMQAMLSCPAFTHLLQVLKDRTVPQHGYPTLQAFLNFFGEFEPLPDTNALKVRREVDG…
A0A2K1J731	Ubiquitin carboxyl-terminal hydrolase OS=Physcomitrium patens OX=3218 GN=PHYPA_020453 PE=3 SV=1	Physcomitrium patens	583	981	42.5	56.3	5.5e-123	MAGQGGPLRPPNTAAPDNLADHRQNKIYELPKKSELKEGTVLGDFGIVFGSFSENEAKLFQSASPPVRQALHKGRDSLPSFQFGDLTGLGELHTYDTYTFAPEERSGENGAAVLPSVQVGSTDVSRRTPADEAAVQRREKGPEAEAGTFENEGDTKQPSKEGRVEQAQAQALAENDHRSNTKQAPKSWASLVGVQPVPGDAGRISGRASGQGKPVARLASKLTTEAVPKLQPRGLINTGNTCFANSTLQALLACPPFLNLLATIKSRTLPPTGFPALRAFASFAGQFRVASEPEQKDQKLGPVDVGRPFAPVMFDDVLRSFSPDQPPRGRPRQEDAQEFLSHVMDRLHEELLWLEGRSIVGQNAVVDDEEWEIVGPKNKSALTRTHMTIKSPLSDIFGG…
A0A2I0K355	USP domain-containing protein OS=Punica granatum OX=22663 GN=CRG98_016626 PE=3 SV=1	Punica granatum	394	737	46.7	60.4	5.4e-89	MSDSKVKASPEVFIFGSFTEDETKSLLLGQSAKSAEKPVGKTKPQFGTLNITVGRPPNDQKSQSSTHQHSLKGTAGLKPSRHPEKDADLPSLKIANDSVPVVSGASKENGNFHGSSPVSPLTNGVKELEIDNGGLVSSNVFQSEDNAKSFSQGSIFDVLDGETSGKADQEGTIEHLAVALRKEETKDESNGPISSTKSLLPRGIINSGNLCFLNATLQALLSCSPFVQLLLDLTHRGIPKVGYPTLNAFAEFISDFETPGSPRKEKKDPSPIDIGQPFSPAMFEVVLHNFTPDVRNSISGRPRQEDAQEFLSFVMDQMHDELLKIGGQSCLSNDRKSSLLSTAEDDEWETVGPKNKSAVTRTQSFVPSELSDIFGGQLRSVVKSKGRSIHFTNI
PLAZA - SEGI_11797		Sequoiadendron giganteum	901	516	58.37	65	2e-88	MHAGLDKHKGRDTCGVIGVHSVDQVFWGKDIIVVRSGVWDLGLEDFQSIQCQYLSSLQNLWSVLLDSCFQVFIFGSFSEDEASFFQKDIVEEDTQLFKQNDLLFGSFDSQVECLQKNPEILSKQACNGEVTASDHLRSNVKSDILNDKERFVSNKGRTGKQSTKKQTVSGSCNAKVAAANGGGMKLESSDECTIVENGVDKITDRTKSFQEFLDESSSKLMGSDTIRRLDSLSLESNDSVEESMEDPTLLSETIPMSWAARFAGKEGNGQVAYSHGGDKSRQKSGAVSAIRKSSQGKTSSSLVENVNIVSASGMGVTMKRWQPRGLKNAGNLCFLNATLQALLSCSPFFQLLQILRSRDIPEVGYPTLRAFVQFLDEIQEDKPADAVLEKNEQEIGWLE…
UniRef100_UPI000D1CBCEC	ubiquitin carboxyl-terminal hydrolase 24 n=1 Tax=Selaginella moellendorffii TaxID=88036 RepID=UPI000D1CBCEC	Selaginella moellendorffii	522	256	40.49	64	2e-78	MENIPLMGEFLILLFEVRKPKPLAVIHCVCSFSRAEAGVSLLLPDSVLTAQARSRPGDSRSASARGFWSFHGAAQDMMDKVILFGSFSEDEALSFQESKSASKPVVKNVSPEKKAPVNTTKTNAGPTKPSNGVKHIAPPPQPQSPKVIAVTPIRNVASQLERTSLNPERQRERDPGASKTVAKSWASLVQPAAITPRGLVNTGNSCYLNSTLQALLSCPPFLQLVLTLKGKTPSPESFPALHGFVSLISEFEKGPSSETRSDLYYRKGESANKDVQTGVALVPSMFDPCLAAFRPNEPRRQEDAPEFLCFLLNQIHEELLKLDGRTVSEVGVAVDDEWETVGPKNRTARVRTCSRIWSPLTDIFCGQLYNNVKPKGSKASIQVEPFYVLTLDISSGTVH…
A0A8T0HXL9	ubiquitinyl hydrolase 1 OS=Ceratodon purpureus OX=3225 GN=KC19_5G036500 PE=3 SV=1	Ceratodon purpureus	492	654	40	53.8	1.7e-75	MADHGGPPRPPFQPPLTTSSHSHRNGDSQFLKQSAGEGGVVGAVDQVLFSPFVFGSFSESEAKYFQSPPPPEKQVVSKEAPSVPLFQFGDLTGFDELRVLDVPTSATRQPSSENGAAALPRLQIGSAEAVERAPGDGSGVQGSEKIPAAETIRFQKEEDTKDPAKVGRDDQGLAQAQAGNDQQASAKQAPKSWASLVGVQQVPGGLSRSPGQVKSAPVPPSKPVTTASPRIQPRGLINTGNSCFANATLQALLSCPPFLNLLVSIKSRNIPQTGFPALGAFANFAAQFKSATEPDQKDQKPGPVDVGKPFAPAMFDDVLRSFSPDQPPRGRPRQEDAQEFLSHIMDRLHEELLWLEGRSVAGQNAVLDDDEWETVGPKNRSALTRTHMAIKSPLSDIFG…
P52479	Ubiquitin carboxyl-terminal hydrolase 10 OS=Mus musculus OX=10090 GN=Usp10 PE=1 SV=3	Mus musculus	792	219	35.46	64	1e-61	MALHNPQYIFGDFSPDEFNQFFVTPRSSVELPPYSGTLCSIQAEDELPDGQEHQRIEFGVDEVIEPSEGLPPTPSYSISSTLNPQAPEFILGCTTSKKIPEAVEKDETYSSIDQYPASALALESNSNAEAETLENDSGAGGLGQRERKKKKKRPPGYYSYLKDGGEDSASPATLVNGHATSVGTSGEAVEDAEFMDVLPPVMPRTCDSPQNPVDFISGPVPDSPFPRTLGGDARTAGLCEGCHEADFEQPCLPADSLLRTAGTQPYVGTDTTENFAVANGKILESPGEDTAANGAELHTDEGADLDPAKPESQSPPAESALSASGAIPISQPAKSWASLFHDSKPSASSPMAYVETKCSPPVPSPLASEKQMEVKEGLVPVSEDPVAIKIAELLETVTL…
A0A8H7PKS3	ubiquitinyl hydrolase 1 OS=Mortierella isabellina OX=91625 GN=INT43_001340 PE=3 SV=1	Mortierella isabellina	546	558	29.8	46.6	6.2e-61	MDTINQSEPRSNDDSNLSRESVRIPHTNICFGDLTREEINNVLTTAGASLIPPKSVPFATGGKQRIRRRQKPPGTKGNKSSVATTPDETTANGVQSQDSTQSSSEQAPVSVAPQPKPKPTSWAALLKPAQAKAQQPGAPATQISSNQNQQKASDSSDNDLPTSQFTGISTIVNTYQPTFDWTLLEPRGLINNVNTCFVNVILQPLVHCPPFYNLIKTIGQYVAHSFNSKTPLVDSLIEFVNEFKILSESGKPEEAFGAPFAPEYVYDALRGRKRFDSMKGRQEDAEEFLCFLLDGLHEEMIADVPKKEVVKELEEISSAVNEMDGWMEVGPKNRTSTVRTMEVPESPISKIFSGNIRSILRCSGSKDSVTLEPFQSLPLDITPDHVGSVEEALHNMTVP…
A0A0R4IVE2	Ubiquitin carboxyl-terminal hydrolase OS=Danio rerio OX=7955 GN=usp10 PE=1 SV=1	Danio rerio	865	217	32.82	64	1e-60	MASQSNQYIFGEFSPDEFNQFFVTPRCYVELPPFNDKVTCVSHSSGGYCTPAVPYITESLRRQVCGEDYQHIEFGVDEVMNAEPVAVKDSLYKVSSTLNPQAPEFILGCQPSQKSLATATPVADIPDGAEFNSLCCSNSETSDMGSHQACLDMDGVSGGLGQRKKKKKRPPGYYNYLEGSNSNSTGVATDGVGPPSLVNGHSPNAPLLSSEDLVGDILPGAELIPPNSITSAPQTTPLSNQRTCESPDNTFDLTSGAASLLDRNGAASLSTSSSSSQSSGVAQSARTAEQHAEPPALESPVLLDNGGHSSSPPSPLPCAALATPTTTIPATTDEREAEGLGEANGLPETASAAGAVDELQDSSETSEVQSASSLTPLSLDSDVQPVVSPVVPAAPAITP…
A0A913X2X6	Ubiquitin carboxyl-terminal hydrolase OS=Exaiptasia diaphana OX=2652724 PE=3 SV=1	Exaiptasia diaphana	729	561	31	47.2	6.2e-60	MPNPVENLCFGDFSLEDWHHILRQVSSSRPPVEFLCDLECSDDDEASAHKEXFVCNPDASKSVPAGLEDSGVEIGLESEQEGQAARNDTPVLFLSDSKEDDKGVVVQFGGTSVIEDKETSNVSSYLQDAENFPPLGGQAQNDERSRKRRRKRRQHQRSGDVPCSSSEDSDREKSPASLIDRTPRVRGSATGGDKSSPTSALEPSKSTAKNGEELKESKPTAGKKESADTSSTDTKSTTETLPTAGESSSNHSDVDSNKEKXSASKSDSEITVKANKPASWADLFRNSTPKTPAVNLMAVKSSTPTSKEINANKVEDLTPKVVVVEEDIRALKTAETLKKLKLNYAQKPVFLRGLINKANWCYINATLQALLACPPFYNLLIEIEPLKNKETTCTPILDS…
A0A8C0GE87	Ubiquitin carboxyl-terminal hydrolase OS=Chelonoidis abingdonii OX=106734 GN=USP10 PE=3 SV=1	Chelonoidis abingdonii	400	538	34.4	54	1.5e-59	LPNVKLIHKPVSLQPRGLINKGNWCYINATLQALVACPPMYHLMKSIPVYSKSQRPCTSTPMIDSFVRLMNEFTNMPVPPKAKQALGDKIARDIRPGAAFEPTYIYRLLTVIKSSLSEKGRQEDAEEYLGFILNGLHEEMLTLKKLLSPHNEKICVSNGPETQSVNEEEDQDEQGEGSEDEWEQVGPRNKSSVTRQADFVQTSITDIFGGHIRSVVYQQSSKESATLQPFFTLQLDIQSDKIRTVQDALESLVARESVQGYTTKTKQEVEISRRVTLEELPPVLVLHLKRFVYEKTGGCQKLIKNIEYPVDLEISKELLSPGVKSKIFKGQRTYRLFAVVYHHGNSATGGHYTTDVFQIGLNGWLRIDDQAVKVINQYQVVKPSAERTAYLLYYRRVDLL
A0A9W9Z4A8	Ubiquitin carboxyl-terminal hydrolase OS=Desmophyllum pertusum OX=174260 GN=USP10 PE=3 SV=1	Desmophyllum pertusum	787	559	35.9	54	2.6e-59	MPNSEEGLTFGDFTTEEWEKYFNNSAAQIGNLPPVEFLFDFEYSDHEEQGNDYRAGDAKVQILTSDSSVAAKNVTAGLEDSGVEVGQESEQENTQEKQRNLQLMLVILWMICPIINRSKSKTCQNQLAATPLNKLYLPETALMNLKMKKRKTNLQDVDSFPPLASTVNSQADKVGDKPENERSRKRRKRRRQRKRSGSVSSSSSECGEKERASVNSGGLNTKGKATASLLTTDKVIVSKAVQRKSTSSCDGETVEERKSSSSTEGTSNSPVQSDTDVKITVTVDTSPDPFSSDQTSKALELEKEAPSTVDQCKQTTSTNKVVTDKKEPPKPSKSSWADLFKNSAKPSPGIVIKTASSVLRTETHSASGLKKTEDPVQTTVGVEEDKYAKKFAEIIQKQE…
A0A7J7ERX5	Ubiquitin carboxyl-terminal hydrolase (Fragment) OS=Diceros bicornis minor OX=77932 GN=HPG69_004987 PE=3 SV=1	Diceros bicornis minor	400	536	35.1	54.4	3e-59	LLENVTLIHKPVSLQPRGLINKGNWCYINATLQALVACPPMYHLMKFIPLYSKVQRPCTSTPMIDSFVRLMNEFTNMPVPPKPRQALGDKIVRDIRPGAAFEPTYIYRLLTVIKSSLSEKGRQEDAEEYLGFILNGLHEEMLNLKKLLSPNDEKLTISNGPKSHSVNEEEQEEPGEGSEDEWEQVGPRNKTSVTRQADFVQTPITGIFGGHIRSVVYQQSSKESATLQPFFTLQLDIQSDKIRTVQDALESLVARESVQGYTTKTKQEVEISRRVTLEKLPPVLVLHLKRFVYEKTGGCQKLVKNIDYPVDLEISKELLSPGVKNKNFKCHRTYRLFAVVYHHGSSATGGHYTTDVFQIGLNGWLRIDDQMVKVINQYQVVKPTADRTAYLLYYRRVDLL
A0A7L2UHP5	Ubiquitin carboxyl-terminal hydrolase (Fragment) OS=Balaeniceps rex OX=33584 GN=Usp10 PE=3 SV=1	Balaeniceps rex	403	533	34.2	55	8.8e-59	AEILENVRLIHKPVSLQPRGLINKGNWCYINATLQALVACPPMYHLMKSIPMYSKSQRPCTSTPMIDSFVRLMNEFTNMPVPPKAKQALGDKIVRDIRPGAAFEPTYIYRLLTVIKSSLSEKGRQEDAEEYLGFILNGLHEEMLTLKKLLSPHNEKLSVSNGPEAQTVHEEEEQDEQGEGSEDEWEQVGPRNKSSVTRQADFVQTPITDIFGGHIRSVVYQQSSKESATLQPFFTLQLDIQSDKIRTVQDALESLVARESVQGYTTKTKQEVEISRRVTLEELPPVLVLHLKRFVYEKTGGCQKLIKNIEYPVDLEISKELLSPGVKSKIFKGQRTYRLFAVVYHHGNSATGGHYTTDVFQIGLNGWLRIDDQAVKVINQYQVVKPSAERTAYLLYYRR…
A0A6P4ZIM9	Ubiquitin carboxyl-terminal hydrolase OS=Branchiostoma belcheri OX=7741 GN=LOC109473807 PE=3 SV=1	Branchiostoma belcheri	865	556	35.3	52.6	1.6e-58	MARVQTDQLTFGDFTTGLSPEEHSRVCGILRAQSPNKRVELPWEEQHRILVATAPAPTAIPEVSAVEDQVAHAPAPGYVDSAPASLQQQDYVQISANHRVDSSSESSYISSSDKQGYYRSPSDSVASSESESVQGKDTVKDDSNGNGNGNNINGNAKPKERRNKKKRPPNYYKDLEAGSAETVVTDVPAPLQRPVENHVDVRPQRISESSGRLEPVDASHQHVPVKDVAISNVNVTSHSNDVPASPLQEPPRTILKTVGDSEIKHRPNVDPIVPSPSVVVVPNGPLSPLPVPADVAKPSAEDTHEVSSHSNPAGAIIEEEAGGNVSNPSQEATAATVYSHNAMGESQEDAKSEESVSQGDDGQSEQSVNNSNPPAVSSPPPATPKTWAGLFKGSSPQMA…
A0A151NM91	Ubiquitin carboxyl-terminal hydrolase OS=Alligator mississippiensis OX=8496 GN=USP10 PE=3 SV=1	Alligator mississippiensis	665	547	30.5	50	2.2e-58	MPGFGKIHEITVVYIFGEFSPDEFNQFFVTPRCSVELPPYNETVSCGIKSASELHDGEDYQRIEFGVNEVIKTESSVLNNTDYSISSTLNPQAPEFILGCAPTQKTSDDILDETNYNSIDCQFSDPALALDSSSNAENDGLSGGLGQRERKKKKKRPPGYYSYLEDVSDGMVPTEALVNGHANSSGLNSISTEDTELAGDIASSVTPRTCNSPENSVDFINEAVSDDSVSSALDNTRTAGQPEVEVKEGPVPVAEDPVAIKIAELLENVKLIHKPVSLQPRGLINKGNWCYINATLQALVACPPMYHLMKSIPLYSKSQRPCTSTPMIDSFVRLMNEFTNMPVPPKAKQALGDKIMRDIRPGAAFEPTYIYRLLTVIKSSLSEKGRQEDAEEYLGFILN…
A0A6P5KH20	Ubiquitin carboxyl-terminal hydrolase OS=Phascolarctos cinereus OX=38626 GN=USP10 PE=3 SV=1	Phascolarctos cinereus	450	533	34.9	55.3	2.9e-58	MALRGPQYVFGDFTPDEFNQFFVTPRSSVELPPYNETILCDTETPEELQDELLENVTLVHKPVSLQPRGLINKGNWCYINATLQALVACPPMYHLMKFIPLYSKVQRPCTSTPMIDSFVRLMNEFTNMPIPPKAKQALGDKIVRDIRPGAAFEPTYIYRLLTVIKSSISEKGRQEDAEEYLGFILNGLHEEMLNLKKLLLPNNEKFSVSNGPETQSVPEDEQGQGEGSEDEWEQVGPRNKTSVTRQADFIQTPITGIFGGHIRSVVYQQSSKESATLQPFFTLQLDIQSEKIHTVQDALESLVARESVQGYTTKTKQEVEISRRVTLEKLPPVLVLHLKRFVYEKTGGCQKLIKNIEYPVDLEISRELLSPGVKNKNFKGHRNYRLFAVVYHHGNSATG…
A0A2Y9NUR3	Ubiquitin carboxyl-terminal hydrolase OS=Delphinapterus leucas OX=9749 GN=USP10 PE=3 SV=1	Delphinapterus leucas	805	551	35	54.6	4.2e-58	MALRNPQYIFGDFSPDEFNQFFVTPRSSVELPPYGGAVLCGAQAAGELPDGQDCQRIEFGVNEVIEPNDTLLRTPNYSISSTLNPQAPEFILSCTTSKKIPNDIDKEVNYSSADCQYPGSALALDGSSNVEAEVLENDGVSGGLGQRERKKKKKRPPGYYSYLKDGGEGGPSTDALVNGHAGPAVPNSVGTEDVDSMGDVPPVGTPRTWGSPQDTTDFVSDAVPAGSFPGALDSGTRTAGQPEGCPGANLEPSRLPAEASRDTLLRTAVAQPAVGTDTTENLGVTNGQILESLGEGTAANGVELHTVESSDSEPARAESDAPPADAAASAAATAPAGHSQPAKSWASLFHGSKPPSSCAAPSPVVSMEAKYSPPATSSLVSEKQAEVKEGLVPVSEDPV…
A0A5J5MYE1	Ubiquitin carboxyl-terminal hydrolase (Fragment) OS=Muntiacus reevesi OX=9886 GN=FD755_006359 PE=3 SV=1	Muntiacus reevesi	775	549	35.1	55.6	5.6e-58	PESYNKFLVCDIKPNGELENYLGPWPLCGARIEFGVNEVIEPNDTLPRTPSYSISSTLNPQAPEFILSCTTSKKLPDDIGKEVNYSSANCQYPGPALALDGGSHAEAEALENDGVSGGLGQRERKKKKKRPPGYYSYLKDGGEGGPSAEALVNGHAGPAVPNSIGAEDADLMGDVPMAGTPRTWGSPQDATDFVSDAGPAGAFPGALDSGARTAGQPEVCPGANSEASCLPAEAGRDTLLRTAVAQPSVGTDTTENLGVTNGQILESLGEGTAANGVELHTVESSDSDPAKAESAPPPADAPASVAGTVPASQPAKSWASLFHDSKPSSSSSPVVSVETKYSPPATSPLVSEKQVEVKEGLVPVSEDPVAIKIAELLENVTLIHKPVSLQPRGLINKGN…
A0A8C5KHK8	Ubiquitin carboxyl-terminal hydrolase OS=Jaculus jaculus OX=51337 GN=Usp10 PE=3 SV=1	Jaculus jaculus	796	549	36.3	55.4	7.2e-58	MNHWDIHNPSYIFGDFSPDEFNQFFVTPRSSVELPPYSGTALYGSQVTDGLPNAGQDCRRIEFGVNEVIEPSDALPRTPSYSISSTLNPQAPEFILGCTTSQKTTAGLDKEVNCSSIDSQCPGSALALDSSSNVEADILENDGVSGGLGQKECKKKKKRPPGYYSYLKDGGDESISPEALVNGHATSAVANSMGAEDAEFIADVLPSVTPRTCDSPQNSMNFISDAVPDSPFPRALDGDARTAGLPEGCHGTDLEQPCLPADSLLRTALAQPFAGTDTTENLVIANGKILESLGEGTAANGIELHTVDSVDLDPSKSESSSPPAESAVSVSGAIPISQPAKSWASLFHDSKPSSSSPMAYVETKCSPPVPSPLASEQRVEVKEGLVPVSEDPVAIKIAE…
A5PJS6	Ubiquitin carboxyl-terminal hydrolase 10 OS=Bos taurus OX=9913 GN=USP10 PE=2 SV=1	Bos taurus	800	549	35.1	55.6	7.6e-58	MALRSPQYIFGDFSPDEFNQFFVTPRASVELPPYGGTVLCGAQAADDLPDGHDYQRIEFGVNEVIEPSDTLPRTPNYSISSTLNPQAPEFILSCTTSKKLPDDIDKEVNYSSANCQYPGPALALDGGSPAEAEALENDGVSGGLGQRERKKKKKRPPGYYSYLKDGGEGGPSAEALVNGHAGPAVSNSVGAEDTDLMGDVPTAGTPRTWGSPQDATDFVSDAGPAGAFPGALDGGARTAGQLEGCPGADSEASCLPAEAGRDTLLRTAVAQPSVGTDTTENLGVTNGQILESLGEGTAANGVELHTVESSDSDPAKAESAPPPADAPASAAGTVPASQPAKSWASLFHDSKPSSSSLPVVSVETKYSPPATSPLVSEKQAEVKEGLVPVSEDPVAIKIA…
A0A6J0XTE2	Ubiquitin carboxyl-terminal hydrolase OS=Odocoileus virginianus texanus OX=9880 GN=USP10 PE=3 SV=1	Odocoileus virginianus texanus	804	549	35.1	55.6	7.9e-58	MGSVILFFFPQYIFGDFSPDEFNQFFVTPRASVELPPYGGTVLCGAQAAGDLPDGHDYQRIEFGVNEVIESSDTLPRTPSYSISSTLNPQAPEFILSCTTSKKLPDDIDKEVNYSSANCQYPGPALALDGGSHAEAEALENDGVSGGLGQRERKKKKKRPPGYYSYLKDGGEGGPSAEALVNGHAGPAVPNSVGAEDADLMGDMPMAGTPRTWGSPQDATDFVSDTGSAGAFPGALDSGARTAGQPEVCPGADSEASCLPAEAGRDTLLRTAVAQPSVGTDTTENLGVTNGQILESLGEGTAANGVESHTVESSDSDPAKAESAPPPAGAPASAAGTVPASQPAKSWASLFHDSKPSSSSSPVVSVETKYSPPATSPLVSEKQAEVKEGLVPVSEDPVA…
A0A452QFT6	Ubiquitin carboxyl-terminal hydrolase OS=Ursus americanus OX=9643 GN=USP10 PE=3 SV=1	Ursus americanus	790	548	35.8	55.2	9.3e-58	FLRYIFGDFSPDEFNQFFVTPRSSVELPPYSGAVVCGPPATDELPDGQEYQRIEFGVNEVIEPNDTLPRTPNYSISSTLNPQAPEFILSCTTSKKTPDDLDKEATYSSVDCQYPGSSLALDGSSSTEVEVLESDGVTGGLGQRERKKKKKRPPGYYSYLKDGGEGSIPTEALVNGHANPAVPNSVGSEDAELVGDMPPSGTPRTCNSPQDSTDFVSDAVPAGPFPGALDDDSRTAGQPEGCPGADSVQSCLPAEAGRDSLLRTAVAQPYTGTHTTENLGVANGQILESSGEGSAANGVELHTVESADSDPAKAGSAPPAADALAAATGTAPTSQPKSWASLFHDSKPSPSSPVASVETKYSPPATSALASEKQIEVKEGLVPVSEDPVAVKIAELLENV…
A0A367ITA0	ubiquitinyl hydrolase 1 (Fragment) OS=Rhizopus stolonifer OX=4846 GN=CU098_001976 PE=3 SV=1	Rhizopus stolonifer	529	534	33.7	49.4	1.2e-57	NLDAIFMPSFCFGEISRAEINSVLNIAGVPLTPPKKTPFATGIPSRKRPIKESVQESKKEGVVEEKEEPRKPVEEQNKPVEQISKPTEETKVIPTETPKPTVKPKPAVGSWASLLKVSENKSKPSSNANTPVSTPTANGKQTPRKLVSPTPSTPKFTGIADIINKYEPIFNAPLLQPRGLINNVNTCFMNVILQPLSHCPPFYNLIKTISTQVAHTIQSKTPLLDSIIEFVNEFQTERPDSIEHYGEPFVPEYVYNALRGQKKFDTLRGRQEDSEEFLCFLLDGLHEEMINVLKERETKEEEEKSDEWLEVGAKNKTSNLRTTGFDESPISKIFGGKVRSVLRCPGAKDSINLEPYQSLPLDIQPENVHSVEDAIANMTLPEIMHDYTSPKGLKVEATK…
A0A9L0K4B6	Ubiquitin carboxyl-terminal hydrolase OS=Equus asinus OX=9793 GN=USP10 PE=3 SV=1	Equus asinus	776	546	35.4	55.1	1.5e-57	MALRSPQLPPYNGTVLCGVQAADDLPDGQEYQRIEFGVNEVIESNGALPRTPNYSISSTLNPQAPEFILSCTASTKTPDDPDKEANYSSTDCPDPASALALDGSSNLEAEVLENDSVSGGLGQRERKKKKKRPPGYYSYLKDGGEGSVSAEALVNGHANPAVPNNLGTEEAESVGDVPRSGTPRTCSSPQDSTDFVSDTVPGGSFPGALDNDARTAGQPEGCPRADLEQSCLPAEAGRDSLLRTAVAQPYIGTDTTENLGVANGQILESLGEGTAANGVELHAVESPNSDPAKAEGASPPGDALASAMGAAPASQPAKSWASLFHDSKPSSSLPVASVETKYSPPATSPLVSEKQAEVKEGLVPVSEDPVAIKIAELLENVTLIHKPVSLQPRGLINKG…
A0A3Q2HBT7	Ubiquitin carboxyl-terminal hydrolase OS=Equus caballus OX=9796 GN=USP10 PE=3 SV=3	Equus caballus	776	546	35.4	55.1	1.5e-57	MALRSPQLPPYNGTVLCGVQAADDLPDGQEYQRIEFGVNEVIESNGALPRTPNYSISSTLNPQAPEFILSCTASTKTPDDPDKEANYSSTDCPDPGSALALDGSSNLEAEVLENDSVSGGLGQRERKKKKKRPPGYYSYLKDGGEGSVSAEALVNGHANPAVPNNLGTEEAESMGDVPRSGTPRTCSSPQDSTDFVSDTVPGGSFPEALDNDARTAGQPEGCPRADLEQSCLPAEAGRDSLLRTAVAQPYIGTDTTENLGVANGQILESLGEGTAANGVELHTVESPDSDPAKAEGASPPGDALASAMGAAPASQPAKSWASLFHDSKPSSSLPVASVETKYSPPATSPLVSEKQAEVKEGLVPVSEDPVAIKIAELLENVTLIHKPVSLQPRGLINKG…
A0A7M4EG22	Ubiquitin carboxyl-terminal hydrolase OS=Crocodylus porosus OX=8502 GN=USP10 PE=3 SV=1	Crocodylus porosus	630	538	34.4	55.3	2.3e-57	MVPTEALVNGHANSSGLNNISTEDTELTGDIASSVTPRTCNSPENSVDFISEAVSDDSVSSALDNTRTAGQPEVYSVTNSEQFCIPSETGRDSPLRTAVVQPFAGTDTTESLGVTNGQTLESSGEGTAANGVELHTVESTDSDQAKPEDASPTTEAPAPVAGSAPVNQPTKSWASLFHNSKPSASTSVAYVETKYTPPATSPVVPEKQVEVKEGPVPVAEDPVAIKIAELLENVKLIHKPVSLQPRGLINKGNWCYINATLQALVACPPMYHLMKSIPMYSKSQRPCTSTPMIDSFIRLMNEFTNMPVPPKAKQALGDKIMRDIRPGAAFEPTYIYRLLTVIKSSLSEKGRQEDAEEYLGFILNGLHEEMLILKKLLSPQNEKLSVSNGPETQTVNEEE…
A0A669BHZ2	Ubiquitin carboxyl-terminal hydrolase OS=Oreochromis niloticus OX=8128 GN=USP10 PE=3 SV=1	Oreochromis niloticus	677	540	34.7	55.2	2.6e-57	KWQNGYIFGEFSPDEINQFFVTPRCYVELPPFNDKVQCVTQSSGEDYQHIEFGVDEVMDSKAVGGNDPLYKVSSTLNPQAPEFILGCQPAQKAQQTASPAADVPDGAHFNSLDGPDSEASALDNHQPCPDMDGLPGNLGQRERKKKKKRPPGYYNYLEPSTGSNSSSTSTADGTPVTALVNGHALSGPHHSTEDVDSKALSGAELSTPGPASTATPTAAVAAAKCAPTSTAWYSKTLVLFIQPLMLLPFEAGVDEETIVLIYLYDTYFFLCHSCAKLPNVKLIHKPVSLQPRGLINKGNWCYINATLQALIACPPMYHLMKSIPLHNETQRPCTSTPMIDNFVRLVNEFNNMPVPSKAKQQAVGDKVTKDIRPGAPFEPTYIYKLLTLIKSSLSEKGRQ…
A0A6P7M2H9	Ubiquitin carboxyl-terminal hydrolase OS=Betta splendens OX=158456 GN=usp10 PE=3 SV=1	Betta splendens	859	547	33.8	55.5	2.7e-57	MAFYSNQYIFGEFSPDEINQFFVTPRCYVELPPFNDKVPCVSQSSDDYQHIEFGVDEVMDSKVIGVNDPLYKVSSTLNPQAPEFILGCQTAQKVQQTTPPDADVPDGTHFNLLNGPDAEASALDNHQVCQDLDGLPGSLGQRERKKKKKRPPGYYSYLDPATGITTTTTNSNSAADGTSATALVNGHALSGPHHSAEDVDIKTFSGGEHCTSGSVSTASSAAAVASAKYPPSSTANQRTCDSPDDSSLELTSGATSLSDGNNANSSSLSSFQSRGMTEELRTADEQLNHLASQSPELSDTVHSPCSKSPLPSSAASSDATSNTTTELEGIKVADSGVANGLAEPDTPTSEDGHKEDWESGEQAEVSPDSAAQPVVSEQAPSTAAPAAPTANLPKSWASL…
G1N5L4	Ubiquitin carboxyl-terminal hydrolase OS=Meleagris gallopavo OX=9103 GN=USP10 PE=3 SV=3	Meleagris gallopavo	630	537	34.2	55.3	3.2e-57	MAPTEALVNGHANSSGLNSIGTEDTELTGDIPSLATPRTCNSPDNSVDFIHEAVSNDSVSSALDNTRTAGQPEVCRVTNSEQFCIPSETGRDSPLRTAVVQPYAGTDTTESHGVTNGQTLESSGEDTAANGVELHTVESTDSDQAKPEEASPTTEATATVAGSVPVNQPAKSWASLFHNSKPSASTSVVYVETKYTPPATSTLVPEKQVEVKEGPVPVSEDPVAIKIAELLENVKLVHKPVSLQPRGLINKGNWCYINATLQALVACPPMYHLMKSIPMYSKSQRPCTSTPMIDSFVRLMNEFTNMPVPPKAKQALGDKIVRDIRPGAAFEPTYIYRLLTVIKSSLSEKGRQEDAEEYLGFILNGLHEEMLTLKKLLSPHNEKLSVSNGPEVQTVHEEE…
A0A087SL38	Ubiquitin carboxyl-terminal hydrolase OS=Auxenochlorella protothecoides OX=3075 GN=F751_2660 PE=3 SV=1	Auxenochlorella protothecoides	442	525	36	52.8	3.4e-57	MERPRNLEQRKVLSPSLHPGPRLVLQEALTIQPHSLVPAAILLWCSKGLPNRGPSSLLPLDAGPLFASSDWVASAATRYEPRGLLNPGNLCFASATVQALLASPAFCSLLSGLAREGAESLPRSVYPTLAALAELAGELQPLGGAPFVPGMLADIVAVFAPLNCTGGDQRREQQDAQEFLTFLVDSMHAELSALAETRGWSRCEAQPGGSARGEDDGEEWLTRSGKRNVRRGESGVMGGASPATALFQGRIASFVAASGAPASVTLQPFCALGLHILRPGIQSVVDALEDLTAAETVAGYRPFPGSQPVSATKTLRLQTLPYLLTLHLMRFEFGGSAGDGANKVGKRVSFEPYITIKGQWLTSDSGDHGALYKLIATVSHRGAESSSGHYTADVLHPSG…
A0A452G595	Ubiquitin carboxyl-terminal hydrolase OS=Capra hircus OX=9925 GN=USP10 PE=3 SV=1	Capra hircus	794	544	31	49.1	3.5e-57	ILFFFPQYIFGDFSPDEFNQFFVTPRASVEVRQNFVLLSACIDLIDGHDYQRIEFGVNEVIEPSDTLPRTPNYSISSTLNPQAPEFILSCTTSKKLPDDIDKEVNYSSANCQYPGPALALDGGSHAEAEALENDGVSGGLGQRERKKKKKRPPGYYSYLKDGGEGGPSAEALVNGHAGPAVPNSVGAEDVDLMGDVPTAGTPRTWGSPQDATDFVSDAGPAGAFLGALDGGARTAGQPEGCPGADSEASCLPAEAGRDTLLRTAVAQPSVGTDTTENLGVTNGQILESLGEGTAANGVELHTVESADSDPAKAESAPPSADAPASAVGTVPASQPAKSWASLFHDSKPSSSPVVSVETKYSPPATSPLVSEKQAEVKEGLVPVSEDPVAIKIAELLENV…
W5PMY2	Ubiquitin carboxyl-terminal hydrolase OS=Ovis aries OX=9940 GN=USP10 PE=3 SV=1	Ovis aries	782	543	34.9	55.6	4.2e-57	SFFFPQYIFGDFSPDEFNQFFVTPRASVELPPYGGTVLCGAQAAGDLPDGHDYQRIEFGVNEVIEPSDTLPRTPNYSISSTLNPQAPEFILSCTTSKKLPDDIELRQLQYPGPALALDGGSHAEAEALENDGVSGGLGQRERKKKKKRPPGYYSYLKDGGEGGPSAEALVNGHAGPAVPNSVGAEDVDFTGYVPTAGIPRTWGSPQDATDFVSDARPAGALLGALDGGARTAGPPEGFPRADSEASCLLGRDTLLRTAVAQPSVGTDTTENLGVTNGQILESLGEGTAANGVELHTVESADSDPAKAESAPPPADAPAPASQPAKSWASLFHDSKPSSSPVVSVETKYSPPATSPLVSEKQAEVKEGLVPVSEDPVAIKIAELLENVTLIHKPVSLQPR…
A0A6J3AW75	Ubiquitin carboxyl-terminal hydrolase OS=Vicugna pacos OX=30538 GN=USP10 PE=3 SV=1	Vicugna pacos	799	543	35.1	55.1	5.1e-57	MSQQKYIFGDFSPDEFNQFFVTPRSSVELPPYGGTVLCGAQDSRELPDGQDCQRIEFGVNEVIEPSDTLPRTPNYSISSTLNPQAPEFILSCTTSKKTPDDIDKEVNYSPSDCQYPGSALALDGSSNVEAEILEADGVSGGLGQRERKKKKKRPPGYYSYLKDGNEVGTSTEALVNGHANPAVPNSVGPEDAELMGDLPPSGTLRTCGSPQDSTDFVSDAVPGGSFPGALDSEARTAGQPEGCQGADFEQSCLPAEAGRDALLRTAVAQPYCGTDTTENFGVANGQILESLGEGTAANGVELHTVESTDSDPTKAESTSPPADTPTSAVGTTPTSQPAKSWASLFHDSKPSSSSSSPVASMETKYSPPTTSPLVPEKQAEIKEGLVPVSEDPVAIKIAE…
A0A9W3FJD1	Ubiquitin carboxyl-terminal hydrolase OS=Camelus bactrianus OX=9837 GN=USP10 PE=3 SV=1	Camelus bactrianus	813	543	35.1	55.1	6e-57	CKCASFSESNVQNSLRVHNEYIFGDFSPDEFNQFFVTPRSSVELPPYGGTVLCGAQDPGELPDGQDYQRIEFGVNEIIEPNDTLPRTPNYSISSTLNPQAPEFILSCTTSKKTPDIDKEVNYSPSDCQYPGSALALDGSSNVEAEVLEADGVSGGLGQRERKKKKKRPPGYYSYLKDGNEVGTSTEALVNGHANPAVPNSVGPEDAELMGDLPPSGTLRTCGSPQDSTDFVSDAVPGGSFPGALDSEARTAGQPEGCHGADFEQSCLPAEAGRDALLRTAVAQPYCGTDTTENLGVANGQILESLGEGTAANGVELHTVESTDSDPTKAESTSPPADTLTSAVGTTPTSQPAKSWASLFHDSKPSSSSSSPVASMETKYSPPTMSPLVPEKQAEIKEGL…
A0A8I3MTK0	Ubiquitin carboxyl-terminal hydrolase OS=Canis lupus familiaris OX=9615 GN=USP10 PE=3 SV=1	Canis lupus familiaris	775	541	35.1	54.9	7.3e-57	MALRNPQLPPYNGAVLCGTQATDELPDGQEYQRIEFGVNEVIEPNDTLPRTPNYSISSTLNPQAPEFILSCTTSKKPPDDLDKEATYSSVDCQYPGSALALDGSSSAEVEVLESDGVSGGLGQRERKKKKKRPPGYYSYLKDGGEGSIPTEALVNGHANSAVPNIVGSEDAELVGEVPPSGTPRTCSSPQDSTDFVSDAVPGGPFPGALDGDTRTAGQPEGCHGADLEQSCLSTEAGRDSLLRTAVAQPYMGTHTTENLGVANGQILESSGEGSAANGVELHTVESTDSDPAKAESTSPAADTPASVAGTAPTSQPKSWASLFHDSKPSSSSPVASVETKYSPPATSPLVSEKQIEVKEGLVPVSEDPVAIKIAELLENVTLIHKPVSLQPRGLINKGN…
A0A3Q7SHP8	Ubiquitin carboxyl-terminal hydrolase OS=Vulpes vulpes OX=9627 GN=USP10 PE=3 SV=1	Vulpes vulpes	798	541	35.1	54.9	9.6e-57	MALRNPQYIFGDFSPDEFNQFFVTPRSSVELPPYNGAVLCGTQATDELPDGQEYQRIEFGVNEVIEPNDTLPRTPNYSISSTLNPQAPEFILSCTTSKKPPDDLDKEATYSSVDCQYPGSALALDGSSSTEVEVLESDGVSGGLGQRERKKKKKRPPGYYSYLKDGGEGSIPTEALVNGHANSAVPNIVGSEDAELVGEVPPSGTPRTCSSPQDSTDFVSDAVPGGPFPGALDGDTRTAGQPEGCHRADLEQSCLSTEAGRDSLLRTAVAQPYMGTHTTENLGVANGQILESSGEGSAANGVELHTVESTDSDPAKAESASPAADTPASVAGTAPTSQPKSWASLFHDSKPSSSSPVASVETKYSPPATSPLVSEKQIEVKEGLVPVSEDPVAIKIAEL…
H2QBM7	Ubiquitin carboxyl-terminal hydrolase OS=Pan troglodytes OX=9598 GN=USP10 PE=3 SV=2	Pan troglodytes	795	540	35.6	55.4	1.3e-56	SRVQYIFGDFSPDEFNQFFVTPRSSVELPPYSGTVLCGTQAVDKLPDGQEYQRIEFGVGEVIEPSDTSPRTPSYSISSTLNPQAPEFILGCTASKITPDGITKEASYGSIDCQYPGSALALDGSSNVEAEVLESDGVSGGLGQRERKKKKKRPPGYYSYLKDGGDDSISTEALVNGHANSAVPNSVSAEDAEFMGDMPPSVTPRTCNSPQNSTDSVSDIVPDSPFPGALGSDTRTAGQPEGGPGADFGQSCFLAEAGRDTLSRTAGAQPCVGTDTTENLGVANGQILESSGEGTATNGVELHTTESIDLDPTKPESASPPADGTGSASGILPVSQPKSWASLFHDSKPSSSSPVAYVETKYSPPAISPLVSEKQVEVKEGLVPVSEDPVAIKIAELLEN…
A0A7L3L1F1	Ubiquitin carboxyl-terminal hydrolase (Fragment) OS=Turnix velox OX=2529409 GN=Usp10 PE=3 SV=1	Turnix velox	747	538	34.7	55	1.3e-56	FSLGEEYQRIEFGVNEVIEKQTSVLNNTDYSISSTLNPQAPEFILSCAPVQKPPAESLSETNYNSIDCQFTDSTLALDSGSNTENDALSGGLGQRERKKKKKRPPGYYSYLEDVSDGVAPTEALVNGHANSSGLNSMGTEDTELMADMPSLATPRTCNSPDNSVDFVNEAVADDCVSSSLDNSRTAGQPEVCRVTNSEQFCLPSAPGRDSPLRTAVVQSYAGTDTTESLGVTNGQTLESSGEDTAANGVELHTVESTDSDQAKPEEASPTTEATVPVAGSVPVNQPAKSWASLFHNSKPSASTSVVYVETKYTPPATSTLVPEKQVEVKEGPVPVSEDPVAIKIAEILENVRLIHKPVSLQPRGLINKGNWCYINATLQALVACPPMYHLMKSIPIYSK…
A0A2N3N5H3	Ubiquitin carboxyl-terminal hydrolase OS=Lomentospora prolificans OX=41688 GN=jhhlp_006296 PE=3 SV=1	Lomentospora prolificans	899	543	34.6	51.7	1.3e-56	MNNRHLPAGPAMQGAGGPSVTSSGDMPTGPSHGGGGGGGGRGRRGPHHYAHQYHQPMHHFANYIPPYPAQYYPHMHPHPQYQNGAMQSPAYMPYQAPYGRSPPPMHQYVPMMGVGVQQNYSARQSQNSPVLSTPYQPPPVPAPIPPHTPSSTHSPHVPPARVTPSPQVAETVKPPPPATQPESPAPIAAERPPFRAPIPWLSRPEEPFPKRTLKKSRRKQMQPLAGGNSVELPVEQHEGAASEAARVAAAEPVSKPQEHKTAEVDVVAGTAAIKPEPVISQDHPSDADTTIPSTPTSTRLAPSSSSPATKPISRPTAPAVPVVPAVPKSGSKESKVPPSETGDEGQSQAPKVGVDVANGHPEEAKEESARSVPAPAPAAQKPKSWASLLSNPISAGRAA…
Q3KR59	Ubiquitin carboxyl-terminal hydrolase 10 OS=Rattus norvegicus OX=10116 GN=Usp10 PE=1 SV=1	Rattus norvegicus	794	540	31.5	49.6	1.3e-56	MALHNPQYIFGDFSPDEFNQFFVTPRSSVELPPYSGTQCGIQAEEELLDGQEHQRIEFGVDEVIEPSDGLQRAPSYSISSTLNPQAPEFILGCPTSKKTPDDIEKDETYSSIDQYPASALALESSSNAEAETLENDSGAGGLGQRERKKKKKRPPGYYSYLKDGSEEGASPAALVNGHATSVGTNSEGVEDPEFMVDMLPSVMPRTCDSPQNPMDLISDPVPDSPFPRTLGGDARTAGLPEGCRETDFEQPCLPTDNLLRTAVTQPNAGADTTENLAVANGKILESLGEGTAAANGVELHTDESADLDPAKPESQSPPAESALSVSGAISISQPAKSWASLFHDSKPSSSSPVAYVETKCSPPVPSPLASEKQMEVKEGLVPVSEDPVAIKIAELLETV…
A0A9P3M2H3	Ubiquitin carboxyl-terminal hydrolase OS=Entomortierella parvispora OX=205924 GN=EMPS_11613 PE=3 SV=1	Entomortierella parvispora	610	531	35.5	55	1.6e-56	MKSLADSYDPQQGPAFGQLTREDISKVVRKDDDGPVIWSIGKRPKAWYPTRKRLLRAQRRKDAAAKAAAAQREAAEAAAAATATQDTTAPTTSVTTPAAPVKPKSWAELVRSKNPAPTTAVTPASGPLSDKTSGAGGRVTNGNGTQFDGIADVLHKYKPSYSSPLIQPRGLVNNGNMCFMNAILQPLLHCPPFYNLLMQIGKHVVHSFKSSTPLVDSLIMFLNEFNLATKNLPDYGPPFVPEYVYDALRGLKRFDSMRGRQEDCQEFLGFLLDGLHEEFFAAMKEKPPGSDLDSFLDNDSSESGVSEDEWMEVTGPKNKASFTRSTQFSATPITTIFSGQLRSILRIPSQKDSVTLEPYQSMQLDLTPDNVYTIEDALLNSTMPEVLDGFTSSERGGVT…
A0A8V0XYW6	Ubiquitin carboxyl-terminal hydrolase OS=Gallus gallus OX=9031 GN=USP10 PE=3 SV=1	Gallus gallus	751	536	34.2	55	2.7e-56	ILRESLPTLRLGEEYQRIEFGVNEVIETESSVLNNTDYSISSTLNPQAPEFILSCAPAQKTPDETNYNSIDCQFSDPTLTLDSGSNAENDGLSGGLGQRERKKKKKRPPGYYSYLEDVSDGVAPTEALVNGHANSSGLNSIGTEDTELTGDIPSLATPRTCNSPDNSVDFVHEAVSDDSVSSALDNTRTAGQPEVCRVTNSEQFCIPSETGRDSPLRTAVVQPYAGTDTTESLGVTNGQTLESSGEDTAANGVELHTVESTDSDQAKPEEASPTTEATATVAGSVPVNQPAKSWASLFHNSKPSASTSVVYVETKYTPPATSTLVPEKQVEVKEGPVPVSEDPVAIKIAELLENVKLVHKPVSLQPRGLINKGNWCYINATLQALVACPPMYHLMKSIP…
Q14694	Ubiquitin carboxyl-terminal hydrolase 10 OS=Homo sapiens OX=9606 GN=USP10 PE=1 SV=2	Homo sapiens	798	537	35.4	55.4	3.4e-56	MALHSPQYIFGDFSPDEFNQFFVTPRSSVELPPYSGTVLCGTQAVDKLPDGQEYQRIEFGVDEVIEPSDTLPRTPSYSISSTLNPQAPEFILGCTASKITPDGITKEASYGSIDCQYPGSALALDGSSNVEAEVLENDGVSGGLGQRERKKKKKRPPGYYSYLKDGGDDSISTEALVNGHANSAVPNSVSAEDAEFMGDMPPSVTPRTCNSPQNSTDSVSDIVPDSPFPGALGSDTRTAGQPEGGPGADFGQSCFPAEAGRDTLSRTAGAQPCVGTDTTENLGVANGQILESSGEGTATNGVELHTTESIDLDPTKPESASPPADGTGSASGTLPVSQPKSWASLFHDSKPSSSSPVAYVETKYSPPAISPLVSEKQVEVKEGLVPVSEDPVAIKIAEL…
A0A8J0SJR9	Ubiquitin carboxyl-terminal hydrolase OS=Xenopus tropicalis OX=8364 GN=usp10 PE=3 SV=1	Xenopus tropicalis	791	534	33.8	54.9	8.3e-56	MASPSGQYIFGEFSDDEFKQFFVTARCTVELPPYNEHFFPCGPQSSGDFQDGEDCPRIEFGIEEVIDHSTALPNNTDYSISSNLNPQAPEFILTCSSSPKTSNNVLHENNFDAINCQFSECAIPDGSGNADSDGTSGTGQRERKKKKKRPPGYYSYLEGVGDVPSETLVNGHANSTGLNSISTDDPDLAEDIPISTTSPRTCNSPDNFVDLNNEALSNDASMHNALDNARTAGQPEECSVTSSEQSCIPSDNGRESPVRTAVVQPFAGTDTTENLGVTNGQTLESSEEGTASNGVVLLPEVSSLSEEAKPEETSTAQAVVHLPGSASANPPAKSWASLFHNSKPSSTTQVAYVETKNATPVTSPQVTEKQVEIKEGPVPVSEDPVAIKIAELLEEVKLV…
A0A8C8WSF0	Ubiquitin carboxyl-terminal hydrolase OS=Panthera leo OX=9689 GN=USP10 PE=3 SV=1	Panthera leo	798	533	34.6	55.1	1.2e-55	MALRNPQYIFGDFSPDEFNQFFVTPRSSVELPPYNGTVLCGTQAPDELPDGQEYQRIEFGVNEVIEPNDTLPRTPNYSISSTLNPQAPEFILSCTTSKKIPDDIDKEAAYSSVDCQYPGSALALDGSSSVEVEVLENDGVAGGLGQRERKKKKKRPPGYYSYLKDGGEGSIPTDALVNGHANPAVPNSVGPEDVELAGAAPPLGTPRTCGSPQGSTDFVSDAVSGGPFPGALDGDARTAGQPGSCHGADLEQSCLPAEAGGDGLSRTAVAQPSPGTHTTENLAVANGQILESSGEGSAANGVELHTVESPDSDAAKAEGAAPAADAPASAAGAAPASQPKSWASLFHDSKPSSSSPVASVETKYSPPATSPLVSEKQVEVKEGLVPVSEDPVAIKIAEL…
A0A8B7JP72	Ubiquitin carboxyl-terminal hydrolase OS=Apteryx mantelli mantelli OX=202946 GN=USP10 PE=3 SV=1	Apteryx mantelli mantelli	795	533	34.2	55	1.2e-55	MGVQFPRLPLTKPYIFGEFSPDEFNQFFVTPRCSVELPPYNETVSCGIKSTGEEYQRIEFGVNEVIETESSVLNNTDYSISSTLNPQAPEFILSCAPAQKPPDDSLSETNYNSIDCQFSDPALALDSGSNAENDGLSGGLGQRERKKKKKRPPGYYSYLEDVSDGIAPPEALVNGHANSSGLNSISTEDTELTGDVPSLATPRTCNSPDNSVDFINEAVSDDSVSSALDNTRTAGQPEVCSVTNSEQFCLPSETGRDSPLRTAVVQSYVGTDTTENLGVTNGQTLESSGEDTAANGVELHTVESTDSDQAKPEEASPTTETTVPVAGSVPVNQPTKSWASLFHNSKPSASTSVVYVETKYTPPATSTLVPEKQVEVKEGPVPVSEDPVAIKIAELLENV…
A0A7M7MP49	ubiquitinyl hydrolase 1 OS=Apis mellifera OX=7460 GN=LOC726488 PE=3 SV=1	Apis mellifera	927	198	33.68	64	1e-53	MDLAMDIQNELDFQFLDLHDLNDNDKNHLINILKSNVTNNTLKLPWDTVEANNDTNASITEIPQLHNQWYHNVPPPPSYAQQIVCSDWQGPAMYPVPTDAHIQPFMPAMTYSHPGYNLGGEIHDVNCNRETNRRNNRGRGIKRDNFNRGISTANEMQPGYMGEQGQFHPPLSFVVMYPDQTQQQQFSGHVHYPPLAIYQPNIHTHTSTHPHTQPTYGYSPYHHPSGNIRCVRQAAPILSQSTQECTKVQTTKSHEKRVQNVYTPVKQPFHQVNEEDNSSQTNIVTTVITVNNSKVEQCTNNVDENIINRKNSTTNGKVPPVNVKIEHNIVSTVNEKCNGAEKNDVPCVNINSSIEVKQNGETDKEYKNETVSSIKTTVVKTLSKPISKNESEINKEDSK…
M9PDK3	ubiquitinyl hydrolase 1 OS=Drosophila melanogaster OX=7227 GN=Usp10 PE=1 SV=1	Drosophila melanogaster	797	189	32.2	64	9e-51	MSWTNSAQHKKSTQSVSVTASPNSVNNGPGVGAAGKANYSHTTKTFTNQQHYQQQHYHTQNSYNNNSSGGGSSSNSSSSSSNNQPQVRNYGTMKMPSSPVAWTAPTPERKNSQQAAAAPAAATASAAPVAITTVTTSTASITATPNQFQPETGSSSASPAVAAAQQQQPAAQQHAQAAQTGAAAAPSKSHSNYASSKKHQSYEPVVLSSVVATSSSANPQPQLNLAPPAPPASQNSSDSSQLSWASLFASNKPVAKVAPYEASKIAQQQPSHPVLQLAPPQPAQVAAAAPVAQLSSPPQNLPLPTAHQQSQLPAPVPAPTAPLVTPGALSYSAASAQAVPAPSPASASVKPLKPEPPRPVQQQLDEWTSKYAEYLTRHKTNLASISLRPRGLTNRSNYC…
A0A2K3DSQ8	ubiquitinyl hydrolase 1 OS=Chlamydomonas reinhardtii OX=3055 GN=CHLRE_05g234850v5 PE=3 SV=1	Chlamydomonas reinhardtii	2047	201	34.07	55	2e-33	MEAGENWQSAHWDNRRNRGEGTGGRGGGRGDYYGGRSGSREDRGGYQRHNNAYGDRQGQVSYQHHGSGQHRPDSVPYANFANRGGGFGSQGRPQQSQQPRQHADQQGFGAGGAHYDPSRGAPFAPPPPPMPYPGYGSSDPSAMHAHAQAHHLYGQEHGWRVMDPAAMQAAAAAAVVAAGQYHPQPHMPAPPLAPYPRGPGGSGGSHSQQQHSYQQQQQQQQTKQQHMGQRQYGQGYQQQQHQQHPQQYQQPQQQYHGGGGQVHTSEPPQHRQGGGGGGVRGGPQGPLPVPGQAGGWAGLAAAAAPAGASSSQSRQGDARRSNARGPAVPQPVVLGSSGPSSLDGSTSGMNSLGKPRQQPGGSAVANVPAARRGSGELPSGVCTPSGQQGNGGGVEEAAS…
D0N4H4	Ubiquitin-specific protease, putative OS=Phytophthora infestans (strain T30-4) OX=403677 GN=PITG_06274 PE=4 SV=1	Phytophthora infestans	620	134	27.87	65	3e-32	MNTGSGTRVEMASATEAHGHDVVITFGDFSLEEAQKALEDDMKNPEEQEAARTQETPKSWAEALGAPKTQTKPAWGGTAAPWAAAAGVNGATDAEVAKDPTKPLPFEEAIQNTLKHLDVSSPAKEMKKRGLVNQGNTCFQNVIMQSVLACPPFLNLLAEISSTSPPTAEMLASTSTFKAWRHMVAFTREFEEPTLAQLQLQAANGERNLNDMHGKTPQAIRISGYFMDVLSAFQKMRGEQEDALEFLEFFLEYLHTEYEKSGLELPSSCEKQTKRRPSTAAKPAEADVAFENAQAFDDGWAEVGKKGKSSVLRQNPVDTIRSPINWLFKGALRSELKQNGKRQSSITVEPFHCLHLNLDYETQDPSFVTGVYGLAKPLSAPITIQDMIRKSFDVEVIED…
Q01477	Ubiquitin carboxyl-terminal hydrolase 3 OS=Saccharomyces cerevisiae (strain ATCC 204508 / S288c) OX=559292 GN=UBP3 PE=1 SV=1	Saccharomyces cerevisiae	912	135	25.97	65	3e-32	MNMQDANKEESYSMYPKTSSPPPPTPTNMQIPIYQAPLQMYGYTQAPYLYPTQIPAYSFNMVNQNQPIYHQSGSPHHLPPQNNINGGSTTNNNNINKKKWHSNGITNNNGSSGNQGANSSGSGMSYNKSHTYHHNYSNNHIPMMASPNSGSNAGMKKQTNSSNGNGSSATSPSYSSYNSSSQYDLYKFDVTKLKNLKENSSNLIQLPLFINTTEAEFAAASVQRYELNMKALNLNSESLENSSVEKSSAHHHTKSHSIPKHNEEVKTETHGEEEDAHDKKPHASKDAHELKKKTEVKKEDAKQDRNEKVIQEPQATVLPVVDKKEPEESVEENTSKTSSPSPSPPAAKSWSAIASDAIKSRQASNKTVSGSMVTKTPISGTTAGVSSTNMAAATIGKSS…
UM008_0178.1	ubiquitinyl hydrolase OS=Ulva mutabilis	Ulva mutabilis	911	120	29.33	38.12	9.34e-29	MDRLLGGQEYKFERIQFVPASTEAASVAVMPPGIEPLNKPIKGSQANKQAKNRAQNTPQPLFPEHNISPSWQTIIPVGAGLQNLGNTCFMNSVLQALAHTPPLAELCLRPDPLPGIKHKGDVTENVQVHVRRALSARGSTNSQARDSLRPTAPFAPHLLARGLRAVNRSFRPGRQEDAHEYLRCLLDHLHEGHLRGHSGAAKPPPALEHTTFVHRIFGGLARSQLRCVGVEYESSQYEPFLDLSLEIFRCKSLHQALEHYTAKAVLDGNNKYRCPLNDKLVKAVRCTRIQEPPNVLTLHLKRFEFAVFGKKVNRHIEFPLSLDLRKYMHATSPKGDHMYNLVSVIVHHGHSVSSGHYVAYVKSASGVWHLADDSRVGSVRPQQVLRQQAYILLYTRRSP…
Q9GRV2	Ubiquitin carboxyl-terminal hydrolase OS=Caenorhabditis elegans OX=6239 GN=usp-3 PE=1 SV=3	Caenorhabditis elegans	550	100	25.74	64	3e-21	MLCTHIKAEDCVERVPKGMFRKKQDMEDNNLFLEGNSNRGKVVKNQEIIKTFCDECDNCNKSLMCLTCGRILCGRNDSGHALHHFEETSHPVVIDCISFELYCYSCDDEVSLDFEPSLYGVLKSLKLLFDREDVMEGGDGPTIPAQPFQTVTSVASTFTQKLHVAPASRNSKKKRGKKGKVSPMFVDTPPFQQQQGAAVIHDVTLSSTNSTSSGSGGATSSSEIAYRPRGMRNVGNTCFMNAVLQALASISEFREYIMSLSSLEDYIHDEKEPKNGGNYCYLTDEYRKLLISQSARSFREPTAPNEFREAFISVCPRFRGFRQHDSHEFMRYFMDSLHTEMRKCRKLPGMPDDKHTPISKYFEGTLQSSVICQTCRNCSNKIDEFMDLSLDIPAQRNAS…

## Sheet: Sup. Data 3b
Supplementary Data 3b. Summary of the optimal growth or body temperature of selected 100 eukaryotes in the UBP24 ortholog analysis.
Species	Optimal temperature (°C)	Motif	Reference
Manihot esculenta	25-30	TQSF	https://onszaden.com/Manihot-esculenta
Hevea brasiliensis	~28	TQSF	http://dx.doi.org/10.20431/2454-6224.0305004
Ricinus communis	20-25	TQSF	Vetriselvan Subramaniyan, in Nuts and Seeds in Health and Disease Prevention (Second Edition), 2020, chapter 34
Populus trichocarpa	22-25	TQSF	lab conditions
Salix brachista	18-24	TQSI	https://greg.app/white-willow-temperature/
Theobroma cacao	18-32	TQSF	https://www.icco.org/growing-cocoa/
Durio zibethinus	25-30	TQSF	https://doi.org/10.1016/j.scienta.2018.06.052
Gossypium raimondii	22-25	TQSF	lab conditions
Tripterygium wilfordii	21-30	SQSF	https://www.picturethisai.com/question/Tripterygium_wilfordii-temperature0.html
Vitis vinifera	20-30	TQSF
Citrus sinensis	21-32	TQSF	https://www.acsgarden.com/articles/plants/citrus-growing.aspx
Rosa chinensis	18-27	TQSF	https://myplantin.com/plant/830
Malus domestica	18-30	TQSF	https://doi.org/10.1186/s43170-020-00007-6
Ziziphus jujuba	20-25	TQSF	https://jujubetrees.com.au/the-biosphere-blog/climate
Carya illinoinensis	~27	TQSF	https://www.srs.fs.usda.gov/pubs/misc/ag_654/volume_2/carya/illinoesis.htm
Ficus carica	13-25	TQSF	https://apps.worldagroforestry.org/treedb2/AFTPDFS/Ficus_carica.PDF
Morus notabilis	18-38	TQSF	https://greg.app/white-mulberry-temperature/
Carnegiea gigantea	18-38	TQSF	https://www.gardenia.net/plant/carnegiea-gigantea
Chenopodium quinoa	18-24	TQSF	https://www.westcoastseeds.com/blogs/wcs-academy/grow-quinoa
Phoenix dactylifera	25-30	TQSF	https://violaplants.com/en/blogs/blog/phoenix-dactylifera-palma-da-dattero?srsltid=AfmBOoq9DZTOyH_GWSH6PC9CrHOJ250KX3gl_Diw1eOppbcra4e1TwgL
Nelumbo nucifera	~24	TQSF	https://www.gardenia.net/plant/nelumbo-nucifera
Glycine max	25-32	TQSF	https://grownextgen.org/student-research/nutrients-in-glycine-max-amidst-temperature-increase
Phaseolus vulgaris	15-27	TQSL	https://www.genebanks.org/resources/publications/beans-eng/
Lupinus albus	15-25	IQSF	https://tropical.theferns.info/viewtropical.php?id=lupinus+albus
Cicer arietinum	18-24	TQSF	https://greg.app/chickpea-temperature/
Brassica carinata	~22	TQSF	lab conditions
Brassica oleracea var. oleracea	~22	TQSF	lab conditions
Brassica napus	~20	TQSF	https://www.nature.com/articles/s41598-023-38910-3
Eutrema salsugineum	18-21	TQSV	https://nzfssrc.org.nz/assets/Project-Reports/Keeping-Our-Watercress-Safe_final-report.pdf
Arabidopsis lyrata	~22	TQSF	lab conditions
Arabidopsis thaliana	~22	TQSF	lab conditions
Capsella rubella	16-20	TQSF	lab conditions
Oryza sativa subsp. japonica	25-35	TQSF	https://www.researchgate.net/publication/330440940_Effect_of_temperature_on_growth_and_yield_of_rice_Oryza_sativa_L_cultivars
Oryza sativa subsp. indica	25-35	TQSF	https://www.researchgate.net/publication/330440940_Effect_of_temperature_on_growth_and_yield_of_rice_Oryza_sativa_L_cultivars
Triticum aestivum	21-24	TQSF	https://gpm.nasa.gov/education/sites/default/files/lesson_plan_files/water-for-wheaties/PR_AG_HS_GrowingWheat.pdf
Zea mays	32-35	TQSF	http://www.pjoes.com/pdf-88669-22528?filename=22528.pdf
Lactuca sativa	25-28	TQNF	DOI - 10.1007/s11103-022-01249-w
Camellia sinensis	12-32deg	TQNF	https://thee.be/en/blog/camellia-sinensis-the-only-true-tea-plant/
Coffea arabica	18-21	TQNF	https://www.climate.gov/news-features/climate-and/climate-coffee
Punica granatum	5-30deg	TQSF	https://greg.app/pomegranate-temperature/
Physcomitrium patens	~25	THMT	lab conditions
Ceratodon purpureus	~20	THMA	https://doi.org/10.1111/j.1399-3054.1987.tb01946.x
Marchantia polymorpha	~22	THQF	lab conditions
Auxenochlorella protothecoides	15-30	n.a.	https://doi.org/10.1016/j.biortech.2019.121788
Chlamydomonas reinhardtii	20-32	n.a.	https://ojs.library.ubc.ca/index.php/expedition/article/view/190215/186969
Caenorhabditis elegans	15-25	n.a.	lab conditions
Ulva mutabilis	~22	n.a.	lab conditions
Phytophthora infestans	20-27	n.a.	https://doi.org/10.1016/j.fcr.2023.108977
Saccharomyces cerevisiae	28-33	TVEI	lab conditions
Lomentospora prolificans	~37	n.a.	https://pmc.ncbi.nlm.nih.gov/articles/PMC4957502/
Mortierella isabellina	15-30	TMEV	https://pubmed.ncbi.nlm.nih.gov/27262947/
Rhizopus stolonifer	15-30	TTGF	https://ephytia.inra.fr/en/C/8021/Melon-Rhizopus-stolonifer
Entomortierella parvispora	~16	STQF	https://www.studiesinmycology.org/sim/Sim103/Vol103Art2.pdf
Drosophila melanogaster	20-29	QTDF	lab conditions
Apis mellifera	33-36	CTEF	https://doi.org/10.1016/j.jtherbio.2018.09.007
Exaiptasia diaphana	~26	TAIF	https://pmc.ncbi.nlm.nih.gov/articles/PMC7022623/
Desmophyllum pertusum	~8-14	MASY	https://www.sciencedirect.com/science/article/pii/S0967064524000602
Branchiostoma belcheri	19-22	TANF	https://journals.plos.org/plosone/article?id=10.1371/journal.pone.0075461
Oreochromis niloticus	20-32	QADF	https://www.sciencedirect.com/science/article/pii/S0306456522000213
Oreochromis aureus	20-30	QADF	http://dx.doi.org/10.9734/arrb/2019/v32i130073
Betta splendens	~25	QADF	https://home.adelphi.edu/~ve21375/Betta%20Fish%20Care.html
Danio rerio	22-32	QADF	lab conditions
Xenopus tropicalis	23-28	QADF	https://xenopus.com/frog-husbandry/
Chelonoidis abingdonii	25-31	QADF	https://www.researchgate.net/publication/321911828_Temperature_sex_determination_incubation_duration_and_hatchling_sexual_dimorphism_in_the_Espanola_Giant_Tortoise_Chelonoidis_hoodensis_of_the_Galapagos_Islands
Meleagris gallopavo	34-40	QADF	https://www.researchgate.net/publication/257160342_Investigation_of_body_surface_temperature_measured_with_infrared_imaging_and_its_correlation_with_feed_efficiency_in_the_turkey_Meleagris_gallopavo
Gallus gallus	41-42	QADF	https://pmc.ncbi.nlm.nih.gov/articles/PMC4651079/
Apteryx mantelli mantelli	~38	QADF	https://www.publish.csiro.au/mu/pdf/MU956199
Turnix velox	~41	QADF	https://www.reddit.com/r/quails/comments/vbcqsp/anyone_elses_quails_got_really_hot_heads_when_you/
Drymodes brunneopygia	~40	QADF	https://journeynorth.org/unpave/robinwinter.html
Alligator mississippiensis	~32	QADF	https://insta-gatorranch.com/frequently-asked-questions-part-2/
Crocodylus porosus	27-31	QADF	https://www.researchgate.net/publication/261143124_Thermal_relations_of_large_crocodiles_Crocodylus_porosus_free-ranging_in_a_naturalistic_situation
Balaeniceps rex	30-33	QADF	https://www.allugandasafaris.com/shoebill-stork/
Arenaria interpres	40-41	QADF	https://digitalcommons.usf.edu/cgi/viewcontent.cgi?article=22603&context=auk
Phascolarctos cinereus	34-39	QADF	https://pubmed.ncbi.nlm.nih.gov/32388686/
Mus musculus	36-37.5	QADF	https://pmc.ncbi.nlm.nih.gov/articles/PMC6310197/
Rattus norvegicus	~37.5	QADF	https://evergreenae.com/wp-content/uploads/2015/06/Rattus-norvegicus-Quick-Facts.pdf
Jaculus jaculus	33-35	QAEF	https://www.sciencedirect.com/science/article/pii/S0140196323001878
Diceros bicornis minor	34.5-37.5	QADF	https://strapi.eaza.net/uploads/2020_EAZA_Black_rhinoceros_Best_Practice_Guidelines_NV_a2e09f245a.pdf
Pan troglodytes	~37	QADF	https://pubmed.ncbi.nlm.nih.gov/19395769/
Homo sapiens	~37	QADF
Bos mutus	~38	QADF	https://www.tandfonline.com/doi/pdf/10.1080/09712119.1995.9706056
Bos taurus	~40	QADF	https://pmc.ncbi.nlm.nih.gov/articles/PMC6898108/
Ovis aries	38-40	QADF	https://extension.umaine.edu/publications/1032e/
Capra hircus	~40	QADF	https://animaldiversity.org/accounts/Capra_hircus/
Odocoileus virginianus texanus	38-40	QADF	https://mixlab.com/blog/hypothermia-and-hyperthermia-in-deer-during-capture-and-chemical-immobilization/
Muntiacus reevesi	38-40	QADF	https://mixlab.com/blog/hypothermia-and-hyperthermia-in-deer-during-capture-and-chemical-immobilization/
Tursiops truncatus	~35	QADF	https://journals.biologists.com/jeb/article/211/20/3249/17705/Thermal-tolerance-in-bottlenose-dolphins-Tursiops
Delphinapterus leucas	~36	QADF	https://www.journals.uchicago.edu/doi/pdf/10.1086/physzool.62.3.30157921
Camelus bactrianus	34-40	QADF	https://www.fao.org/4/x1700t/x1700t05.htm
Vicugna pacos	37-38	QADF	https://www.gbif.org/species/7515593
Carlito syrichta	34	QADF	https://genomics.senescence.info/species/entry.php?species=Carlito_syrichta
Canis lupus familiaris	32-35	QAEF	https://www.researchgate.net/figure/Evaluation-of-thermal-status-in-a-canine-Canis-lupus-familiaris-with-fever-A-Dog-in_fig21_362944898
Nyctereutes procyonoides	~38	QAEF	https://www.researchgate.net/figure/The-body-temperature-8-C-of-a-juvenile-female-raccoon-dog-F4-in-February-March-2006_fig2_5772343
Vulpes vulpes	38-39	QAEF	https://genomics.senescence.info/species/entry.php?species=Vulpes_vulpes
Ursus americanus	33-37	QAEF	https://pmc.ncbi.nlm.nih.gov/articles/PMC3607235/
Ailuropoda melanoleuca	35-37	QADF	DOI - 10.20944/preprints202308.1739.v1
Panthera leo	37-38	QAEF	https://pmc.ncbi.nlm.nih.gov/articles/PMC7459775/
Equus asinus	36-38	QADF	https://wvs.academy/quick-reference/donkey/clinical-parameters/
Equus caballus	37-38	QADF	https://www.mdpi.com/2076-3417/14/13/5413
Myotis myotis	30-42	QADF	DOI - 10.1139/cjz-2020-0276
Selaginella moellendorffii	~24	TCSR	https://pmc.ncbi.nlm.nih.gov/articles/PMC5307293/
Diphasiastrum complanatum	~18	VYSY	https://earthone.io/nl/plant/lycopodium%20complanatum?srsltid=AfmBOopNlYWn0P1yFFNaXbS-li9W71c6BjnXnROM7H_xoSfLXac-Y1_Y
Adiantum capillus-veneris	~24	THTF	https://www.plantsrescue.com/posts/adiantum-capillus-veneris
Ceratopteris richardii	~28	THAF	https://plantmethods.biomedcentral.com/articles/10.1186/s13007-015-0080-8
Adiantum nelumboides	15-38	THTF	https://www.picturethisai.com/wiki/Adiantum_nelumboides.html
Sequoiadendron giganteum	20-25	TQSF	https://www.picturethisai.com/care/temperature/Sequoiadendron_giganteum.html
Cryptomeria japonica	20-35	TQSF	https://www.picturethisai.com/care/temperature/Cryptomeria_japonica.html
Taxus chinensis	~20	TQSF	https://www.picturethisai.com/care/Taxus_chinensis.html
Amborella trichopoda	16-18	TQSF	https://www.researchgate.net/publication/347737508_Amborella_trichopoda
