# Supplementary material for: Evolutionary tuning of molecular charge state of UBP24 shapes eukaryotic responses to high temperature
Source: Research Square preprint supplement (doi:10.21203/rs.3.rs-7157930/v1), 2025-11-11
Supplement: Supplementary file 1 [file de3ecf9975a3050e7c9cb819.pdf]

## *Supplementary information*

# **Evolutionary tuning of molecular charge state of UBP24 shapes eukaryotic responses to high temperature**

Shao-Li Yang, Xiangyu Xu, Hongyan Liu, Anton Gorkovskiy, Tingting Zhu, Cassio Flavio Fonseca De Lima, Brigitte Van De Cotte, Jennifer Molinet, Karin Voordeckers, Kevin J. Verstrepen, Rike Stelkens, Kris Gevaert, Lam Dai Vu and Ive De Smet

|                                                               |    |
|---------------------------------------------------------------|----|
| Supplementary Table 1. Primers used in this study .....       | 2  |
| Supplementary Table 2. Key resources used in this study ..... | 7  |
| Supplementary methods .....                                   | 13 |
| Supplementary references .....                                | 17 |

**Supplementary Table 1. Primers used in this study**

| Name                | Sequence (5' to 3')                                              | Purpose | Reference/Source |
|---------------------|------------------------------------------------------------------|---------|------------------|
| UBP24-CDS-BsaIA-F   | TACCTT <u>GAGACCT</u> TATGAGTGAAAAGAAGGTATTTGTGTTTG              | Cloning |                  |
| UBP24-CDSns-BsaIG-R | CATACT <u>GAGACCC</u> ACTTGCTTGTAGAAGAGGACATAG                   | Cloning |                  |
| UBP24-S360A-F       | CTGTGACAAGAACACAAG <b>GCT</b> TTTGTTCGGTCTGAGC                   | Cloning |                  |
| UBP24-S360A-R       | GCTCAGACGGAACAAAA <b>GCT</b> TGTGTTCTTGTACAG                     | Cloning |                  |
| UBP24-S360D-F       | CTGTGACAAGAACACAAG <b>GAT</b> TTTGTTCGGTCTGAGC                   | Cloning |                  |
| UBP24-S360D-R       | GCTCAGACGGAACAAAA <b>TCT</b> TGTGTTCTTGTACAG                     | Cloning |                  |
| UBP24-C206S-F       | TAAACGCTGGAAACTTG <b>TCC</b> TTCTGAATGCAACAC                     | Cloning |                  |
| UBP24-C206S-R       | GTGTTGCATTCAGGA <b>AGG</b> ACAAGTTTCCAGCGTTTA                    | Cloning |                  |
| UBP24-CDS-attB3-F   | <u>GGGGACA</u> ACTTTGTATAATAAAGTTGGGATGAGTGAAAAGAAGGTATTTGTGTTTG | Cloning |                  |
| UBP24-CDSns-attB2-R | <u>GGGGACCA</u> CTTTGTACAAGAAAGCTGGGTACACTTGCTTGTAGAAGAGGACATAG  | Cloning |                  |
| UBP24p-gib-F        | <u>TCCAAGCTCAAGCTAAGCTTC</u> CTACATGATTTTCAATAATAAGTC            | Cloning |                  |
| UBP24p-gib-R        | <u>TGCTCACC</u> ATATTTGGCACATAGAACGC                             | Cloning |                  |
| YFP-gib-F           | <u>TGTGCCAA</u> ATATGGTGAGCAAGGGCGAG                             | Cloning |                  |
| YFP-gib-R           | <u>CTTTTTTG</u> TACTTGTACAGCTCGTCCATGC                           | Cloning |                  |
| UBP24-linker-gib-F  | <u>GCTGTACA</u> AGTACAAAAAGCAGGCTTAAC                            | Cloning |                  |
| UBP24-gib-R         | <u>TTGAACG</u> ATCCACTTGCTTGTAGAAGAG                             | Cloning |                  |
| NOST-gib-F          | <u>CAAGCAAG</u> TGGATCGTTCAAACATTTGG                             | Cloning |                  |
| NOST-gib-R          | <u>CCGACGTCG</u> CATGCCTGCAGGATCTAGTAACATAGATGACAC               | Cloning |                  |

|                  |                                                                                                |         |  |
|------------------|------------------------------------------------------------------------------------------------|---------|--|
| UBP24-frag-gib-F | <u>GTCGAATCAAATGCATGATGAGTTGTTG</u>                                                            | Cloning |  |
| UBP24-frag-gib-R | <u>TGTTAGCAGCCTCGAATCAACAACGCGTCTTCTATTCC</u>                                                  | Cloning |  |
| GST-attB1-F      | <u>GGGGACAAGTTTGTACAAAAAAGCAGGCTTGATGTCCCCTATACTAGGTTATTGG</u>                                 | Cloning |  |
| GST-attB4-R      | <u>GGGGACAAC TTTGTATAGAAAAGTTGCTCATTGATTGACCATGGACG</u>                                        | Cloning |  |
| GST-gib-F        | <u>TTTAACTTTAAGAAGGAGTCAACAATGTCCCCTATACTAGGTTATTGG</u>                                        | Cloning |  |
| GST-gib-R        | <u>CATCATGCATTTGATTGACCATGGACG</u>                                                             | Cloning |  |
| AHA1p-gib-F      | <u>TCCAAGCTCAAGCTAAGCTTCGACGAATGATCTAATCAC</u>                                                 | Cloning |  |
| AHA1p-gib-R      | <u>AGGAGGCCATCTTCACCCAGAAGAAATC</u>                                                            | Cloning |  |
| RFP-gib-F        | <u>CTGGGTGAAGATGGCCTCCTCCGAGGAC</u>                                                            | Cloning |  |
| T3S5_R1          | <u>CCGACGTCGCATGCCTGCAGAGGTC</u> ACTGGATTTTGGTTTTA                                             | Cloning |  |
| Ub-F1            | <u>ACCTTGAGACCTATGCAGATCTTCGTGAGAACCTTGACCGGCAGGACCATCACTCTCGAGGTCGAGAGCAGC</u><br>GACACCATCGA | Cloning |  |
| Ub-R1            | <u>ATACGAGACCTTAACTCCTCTAAGCCTCAACACAAGATGAAGTGTAGATTCTCTCTGGATGTTGTAGTCAG</u><br>CCAAAGTACG   | Cloning |  |
| Ub-K63-R1        | <u>ATACGAGACCTTAACTCCTCTAAGCCTCAACACAAGATGAAGTGTAGATTCTTTCTGGATGTTGTAGTCAG</u><br>CCAAAGTACG   | Cloning |  |
| Ub-F2            | CAATGTCAGGGCCAGGATCCAAGACAGAGAAGGAATCCCTCCGGATCAGCAGAGATTGATCTTCGCCGGAAG<br>GCAGCTCGAAG        | Cloning |  |
| Ub-R2            | GCCATCTTCGAGCTGCCTTCCGGCGAAGATCAATCTCTGCTGATCCGGAGGGATTCCCTTCTCTGTCTTGGAT<br>CCTGGCCCTGA       | Cloning |  |
| Ub-K48-F2        | CAATGTCAGGGCCAGGATCCAAGACAGAGAAGGAATCCCTCCGGATCAGCAGAGATTGATCTTCGCCGGAAG<br>GCAGCTCGAAG        | Cloning |  |
| Ub-K48-R2        | GCCATCTTCGAGCTGCTTTCCGGCGAAGATCAATCTCTGCTGATCCGGAGGGATTCCCTTCTCTGTCTTGGAT<br>CCTGGCCCTGA       | Cloning |  |
| Ub-F3            | ATGGCCGTACTTTGGCTGACTACAACATCCAGAGAGAATCTACACTTCATCTTGTGTTGAGGCTTAGAGGAG<br><u>GTTAAGGTCTC</u> | Cloning |  |
| Ub-K63-F3        | ATGGCCGTACTTTGGCTGACTACAACATCCAGAAAGAATCTACACTTCATCTTGTGTTGAGGCTTAGAGGAG<br><u>GTTAAGGTCTC</u> | Cloning |  |
| Ub-R3            | CATTGTCGATGGTGTGCTGCTCTCGACCTCGAGAGTGATGGTCCTGCCGGTCAAGGTTCTCACGAAGATCT<br>GCATAGGTCTCA        | Cloning |  |

|                         |                                                              |                 |  |
|-------------------------|--------------------------------------------------------------|-----------------|--|
| RAF20KD-gib-F           | <u>TGTACAAAAAGCAGGCTTACTTAGGACGCCGGATTCTGAAC</u>             | Cloning         |  |
| RAF20KD-gib-R           | <u>TTGTACAAGAAAGCTGGGTTCATTTGGAAGCCCTGTGAGCTG</u>            | Cloning         |  |
| OST1-S175A-F            | TCGCAACCAAAA <b>GCA</b> ACTGTTGGA                            | Cloning         |  |
| OST1-S175A-R            | TCCAACAGT <b>TGC</b> TTTTGGTTGCGA                            | Cloning         |  |
| OST1-frag-BsaIB-F       | TAGGCTT <u>GAGACCG</u> TCAGGAGTTAGTTACTGTCATGC               | Cloning         |  |
| OST1-frag-BsaIG-R       | CGATACT <u>GAGACCA</u> ATTCTTTGGTTCCTCGGGAT                  | Cloning         |  |
| UBP24-gRNA1-604-F       | ATTGGATGCCTCTGTGACCCCCAT                                     | CRISPR-gRNA     |  |
| UBP24-gRNA1-604-R       | AAACATGGGGGTCACAGAGGCATC                                     | CRISPR-gRNA     |  |
| UBP24-gRNA3-1812-F      | ATTGGTTAAAGACTTTACACCAAG                                     | CRISPR-gRNA     |  |
| UBP24-gRNA3-1812-R      | AAACCTTGGTGTAAGTCTTTAAC                                      | CRISPR-gRNA     |  |
| UBP24-gRNA5-2416-F      | ATTGGAATTCTAAAGACAAGTGTG                                     | CRISPR-gRNA     |  |
| UBP24-gRNA5-2416-R      | AAACCACACTTGTCTTTAGAATTC                                     | CRISPR-gRNA     |  |
| sgUBP3_upstream_guide_F | /5Phos/GATCGATGGAAAGGAAAGCGGTACCG                            | CRISPR-gRNA     |  |
| sgUBP3_upstream_guide_R | /5Phos/AAAACGGTACCGCTTTCCTTTCCATC                            | CRISPR-gRNA     |  |
| sgUBP3_CDS_guide_F      | /5Phos/GATCGAACAATCTCGACAGTCCTCTG                            | CRISPR-gRNA     |  |
| sgUBP3_CDS_guide_R      | /5Phos/AAAACAGAGGACTGTCGAGATTGTTC                            | CRISPR-gRNA     |  |
| UBP3_KO_RT_F            | AGAAAGTCATTTTAATAGTAAGTCAGACTCGTCTGCTACCATCATGACGGGGGGTGGTAT | Repair template |  |
| UBP3_KO_RT_R            | CTATATTATTTTTTATGTATTTTGTCTATAATACCACCCCCGTCATGATGGTAGCAGAC  | Repair template |  |
| UBP3_E691A_RT_F         | AGCAAAAGAGGCAAGAAACTAAGACCGCTGCCAAGAGGACTGTCgccATTGTTCCATCA  | Repair template |  |
| UBP3_E691A_RT_R         | GAACTGGCCACCGAAAAGTTTGGAGATTGGTGATGGAACAATggcGACAGTCCTCTTGGC | Repair template |  |

|                 |                                |            |   |
|-----------------|--------------------------------|------------|---|
| ubp24-1_LP      | TTTTGGGTCCTAAAATCCCAC          | Genotyping |   |
| ubp24-1_RP      | TCGAGCTCTAAATTTCAAGCG          | Genotyping |   |
| ubp24-crispr_LP | CTCTCTAACTTAGCTCTCCTCCAAATTCGG | Genotyping |   |
| ubp24-crispr_RP | CGCCTTCTACTTGATTGATTGAACCATG   | Genotyping |   |
| UBP3_KO_check_F | AACCCATCGGGAAACACATA           | Genotyping |   |
| UBP3_KO_check_R | GCTGCTAACGCAAGAGCAAT           | Genotyping |   |
| UBP3_seq1       | AACGGCAACGGTTCTTCG             | Genotyping |   |
| UBP3_seq2       | CCGTAGTGTTTATGAACAGTGGC        | Genotyping |   |
| UBP3_seq3       | CCAGTCCATTCCATTATTCCAAGAG      | Genotyping |   |
| UBP3_seq4       | CGACTCTTGAATTGGTATTCCG         | Genotyping |   |
| UBP3_seq5       | CATTGAAAAACAACACCTCAGGG        | Genotyping |   |
| Actin-qPCR-F    | GGCTCCTCTTAACCCAAAGGC          | qPCR       | 1 |
| Actin-qPCR-R    | CACACCATCACCAGAATCCAGC         | qPCR       | 1 |
| UBP24-qPCR-F1   | AAGCAAGTGTAAGAGATT             | qPCR       |   |
| UBP24-qPCR-R1   | TATAAGATGAGAACCAGATTA          | qPCR       |   |
| UBP24-qPCR-F2   | TCGGATAAGAACAATGAT             | qPCR       |   |
| UBP24-qPCR-R2   | TCAGACATAGACAAGTTAT            | qPCR       |   |
| AHA1-qPCR-F1    | GGAAAGAGGGGGAGAAAATG           | qPCR       | 2 |
| AHA1-qPCR-R1    | GGAGCCAATATCCTTGACGA           | qPCR       | 2 |
| AHA1-qPCR-F2    | CATCGACAGTAGCGGAGAGA           | qPCR       | 2 |

| AHA1-qPCR-R2                                          | GCCAACTCAATAGCAAGCAA                                                                                                                                                                                                                                                                                                                                                                                                                                                                                                                                                                                                                                                                                                                                                                                                                                                                                                                                                                                                                                                                                                                                                                                                                                                                                                                                                                                                                                                                                                                                                                                                                                                                                                                                                                          | qPCR                | 2                |
|-------------------------------------------------------|-----------------------------------------------------------------------------------------------------------------------------------------------------------------------------------------------------------------------------------------------------------------------------------------------------------------------------------------------------------------------------------------------------------------------------------------------------------------------------------------------------------------------------------------------------------------------------------------------------------------------------------------------------------------------------------------------------------------------------------------------------------------------------------------------------------------------------------------------------------------------------------------------------------------------------------------------------------------------------------------------------------------------------------------------------------------------------------------------------------------------------------------------------------------------------------------------------------------------------------------------------------------------------------------------------------------------------------------------------------------------------------------------------------------------------------------------------------------------------------------------------------------------------------------------------------------------------------------------------------------------------------------------------------------------------------------------------------------------------------------------------------------------------------------------|---------------------|------------------|
| Optimised <i>UBP24 CDS</i><br>without a<br>stop codon | ATGAGTGAAGAAGGTATTTGTGTTTGGATCCTTTACAGAACATGAACTAGGTCATTTTTTGAGCAGAAA<br>CCCACTAAGGATCCTCAGAAATTTCTAAAGACAAGTGTGTGGGAAGTATTCAATTTGGCTCCTTGAATCTTGCT<br>GCGGAAAATTCTTCAGTAAATACTAATGGCGAGTTGAAGAAAGGTGAGGCTGATGGGACAGTTAAATCTGCT<br>GGGAGTCAAGAGAGACTTGATGCTTCTAGACCTGCCAGCTCGGATAAGAACAATGATAGTGATGCAAACTC<br>CCAAGAAAGAACTCTTTGAGAGTTCCAGAGCATGTGGTACAAAATGGAATCATAAAGAGATCTCTGAAAGC<br>AACAAATCTCTCAACAATGGTGTGGCGGTGAAAACAGATCCTATTGGTTTGGATAACTTGTCTATGTCTGAT<br>GGTGAAAGTGATCCTGTGTATAAAGCTTCGAGCTCTAAATTTCAAGCGCTGGACAATGAAGATTTCTCAAGT<br>GACTCTTCGTCTGGAAGCATTCAAAGAAAGAAAAACCTGAAGTTTCTACTGAATCTGTTCCACCTGTAAA<br>GACTTTACACCAAGAGGATTAATAAACGCTGGAACTTGTGCTTCTGAATGCAACACTACAAGCGTTGCTT<br>TCATGTTCTCCTTTTGTGCAGCTCCTCCAGAAAATTCAACTCCAAGATATCCAAAGGCTGACTCTCCAACC<br>TTAGCTGCATTTTCCGAGTTCATCTCCGAATTGGATGTGCCAAGCAGTTCCAGCATCAGAAATAACGTTACT<br>GTTGTTGAGGCTGGTAGACCTTTTAGACCTGCCATGTTTCGAAGGAGTCCTTAGAAATTTTACCCAGATGTA<br>CTCAACAACATGTCTGGTAGGCCAAGGCAGGAAGATGCTCAAGAGTTTTTGAGTTTTATAATGGACCAAATG<br>CATGATGAGTTGTTGAACTCAAGGAACAGTCCCCAAAGTCACCGCTTCTAAGTCATCGGTTATTTCTTCT<br>GCCAACGATGATGGTGATGAATGGGAAACAGTTGGACCCAAAAACAAATCAGCTGTGACAAGAACACAAAGT<br>TTTGTTCCGTCTGAGCTTAGTGAGATATTTGGCGGGCAGCTTAAAGCGTAGTGAAGGCAAAAGGAACTAAA<br>GCTTCGGCTACTGTACAGCCGTATCTCTTGCTACACCTTGATATTCATCCGGACGGTGTGCAAGGAATAGAA<br>GACGCGTTGCATTTGTTTTCTGCCAAGAAGATCTTGAAGGATATAGAGCCTCGGTTACTGGGAAGACTGGT<br>GTAGTGAGTGCTAGTAAGTCGATAAAGATACAGAACTCTCAAAGATAATGATACTGCACCTAATGCGTTTT<br>AGCTACGGAAGCCAAGGGAGTACTAAGCTGCGTAAAGGCGTTAAATTTCCCTTGAACCTCAACTTAAACCGC<br>AGCCATCTTGTTTCTCTATCCAATGAGAGTTTGAGATATGAACTTGTGGCAACAATTACCCACCACGGATGG<br>GATCCCTCAAAAGGACACTACACCACAGATGCTCGACGAAAGAATGGTCAATGGCTAAGGTTGATGATGCC<br>TCTGTGACCCCATAGGGACAAAACCTGGTGTGTCACGATCAAGCCTATGTCTCTCTACAAGCAAGTG | DNA<br>manipulation | Twist Bioscience |

**Note.** Bold letters indicate the introduction of missense mutations. Underlined letters indicate restriction enzyme recognition sites or overlapping regions for Gateway or Gibson recombination.

**Supplementary Table 2. Key resources used in this study**

| Type     | Name                                 | Identifier  | Information                    | Reference    |
|----------|--------------------------------------|-------------|--------------------------------|--------------|
| Gene     | UBP24                                | AT4G30890   |                                |              |
| Gene     | OST1                                 | AT4G33950   |                                |              |
| Gene     | ABA2                                 | AT1G52340   |                                |              |
| Gene     | PYR1                                 | AT4G17870   |                                |              |
| Gene     | PYL1                                 | AT5G46790   |                                |              |
| Gene     | PYL4                                 | AT2G38310   |                                |              |
| Gene     | PYL5                                 | AT5G05440   |                                |              |
| Gene     | PYL8                                 | AT5G53160   |                                |              |
| Gene     | RAF20                                | AT1G79570   |                                |              |
| Gene     | RAF24                                | AT2G35050   |                                |              |
| Gene     | AHA1                                 | AT2G18960   |                                |              |
| Gene     | UBQ1                                 | AT3G52590   |                                |              |
| Strain   | FY4xFY5 (diploid prototrophic S288C) | GA763       |                                | <sup>3</sup> |
| Strain   | <i>Δubp3</i>                         | GA1709      | Generated in this study        |              |
| Strain   | <i>ubp3<sup>E691A</sup></i>          | GA1713      | Generated in this study        |              |
| Chemical | BbsI-HF                              | NEB, R3539L | Restriction enzyme for cloning |              |
| Chemical | BsaI-HFv2                            | NEB, R3733L | Restriction enzyme for cloning |              |
| Chemical | BsmBI-v2                             | NEB, R0739L | Restriction enzyme for cloning |              |

|          |                                                                                   |                          |                                         |  |
|----------|-----------------------------------------------------------------------------------|--------------------------|-----------------------------------------|--|
| Chemical | T4 DNA ligase                                                                     | NEB, M0202L              | Ligase for cloning                      |  |
| Chemical | EndoLysC                                                                          | SignalChem, L585-31N     | Protease for mass spectrometry analysis |  |
| Chemical | Sequencing grade modified trypsin                                                 | Promega, V5111           | Protease for mass spectrometry analysis |  |
| Chemical | Tris(hydroxymethyl) aminomethane (Tris base)                                      | AnalytiChem, CL00.2042   |                                         |  |
| Chemical | Sodium hypochlorite solution                                                      | AnalytiChem, CL02.1438   |                                         |  |
| Chemical | Murashige and Skoog (MS) medium                                                   | Duchefa Biochemie, M0222 |                                         |  |
| Chemical | Sucrose (Saccharose, D[+])                                                        | AnalytiChem, CL00.1927   |                                         |  |
| Chemical | MES monohydrate                                                                   | Duchefa Biochemie, M1503 |                                         |  |
| Chemical | Agar No. 4 - plant tissue culture grade                                           | Neogen, NMC0250A         |                                         |  |
| Chemical | Sodium hydroxide (NaOH)                                                           | Supelco, 106498          |                                         |  |
| Chemical | Potassium hydroxide (KOH)                                                         | Supelco, 105012          |                                         |  |
| Chemical | Potassium chloride (KCl)                                                          | Supelco, 104936          |                                         |  |
| Chemical | Calcium chloride dihydrate ( $\text{CaCl}_2 \cdot 2\text{H}_2\text{O}$ )          | Sigma-Aldrich, C3306     |                                         |  |
| Chemical | Magnesium chloride hexahydrate ( $\text{MgCl}_2 \cdot 2\text{H}_2\text{O}$ )      | Supelco, 105833          |                                         |  |
| Chemical | Manganese(II) chloride tetrahydrate ( $\text{MnCl}_2 \cdot 4\text{H}_2\text{O}$ ) | Supelco, 105927          |                                         |  |
| Chemical | Calcium sulfate dihydrate ( $\text{CaSO}_4 \cdot 2\text{H}_2\text{O}$ )           | Sigma-Aldrich, C3771     |                                         |  |
| Chemical | Dithiothreitol (DTT)                                                              | Duchefa Biochemie, D1309 |                                         |  |
| Chemical | Ethylenediaminetetraacetic acid (EDTA)                                            | Duchefa Biochemie, E0511 |                                         |  |
| Chemical | Glycine                                                                           | Supelco, PHR1111         |                                         |  |
| Chemical | Glycerol                                                                          | Sigma-Aldrich, P12352200 |                                         |  |



|          |                                                                               |                                         |                                 |  |
|----------|-------------------------------------------------------------------------------|-----------------------------------------|---------------------------------|--|
| Chemical | Sodium dodecyl sulfate (SDS)                                                  | Sigma-Aldrich, 822050                   |                                 |  |
| Chemical | IGEPAL CA-630 (NP-40)                                                         | Sigma-Aldrich, I8896                    |                                 |  |
| Chemical | Hydrochloric acid (HCl)                                                       | Supelco, 100317                         |                                 |  |
| Chemical | Dimethyl sulfoxide (DMSO)                                                     | Sigma-Aldrich, D4540                    |                                 |  |
| Chemical | Abamine SG oxalic acid salt                                                   | Chiralix, CX94224                       |                                 |  |
| Chemical | Absciscic acid (ABA)                                                          | Sigma-Aldrich, A1049                    |                                 |  |
| Chemical | Cycloheximide (CHX)                                                           | Sigma-Aldrich, 01810                    |                                 |  |
| Chemical | Concanamycin A (ConcA)                                                        | Santa Cruz Biotechnology,<br>SC-202111A |                                 |  |
| Chemical | MG132                                                                         | Sigma-Aldrich, M8699                    |                                 |  |
| Chemical | Isopropyl $\beta$ -D-thiogalactopyranoside (IPTG)                             | Sigma-Aldrich, I6758                    |                                 |  |
| Chemical | adenosine-5'-o-(3-thio)-triphosphate (ATP $\gamma$ S)                         | Sigma, A1388                            |                                 |  |
| Chemical | p-Nitrobenzyl mesylate (PNBM)                                                 | Sigma, SML3810                          |                                 |  |
| Chemical | Difco skim milk                                                               | Becton Dickinson, 232100                |                                 |  |
| Chemical | cOmplete ULTRA Tablets, Mini, EDTA-free, EASYpack protease inhibitor cocktail | Roche, 05892791001                      |                                 |  |
| Chemical | PhosSTOP                                                                      | Roche, 4906837001                       |                                 |  |
| Chemical | Miller's LB broth base                                                        | Invitrogen, 12795027                    |                                 |  |
| Chemical | NEBuilder HiFi DNA Assembly kit                                               | NEB, E2621L                             | Enzyme for Gibson cloning       |  |
| Chemical | Gateway LR Clonase II Enzyme mix                                              | Invitrogen, 11791                       | Recombinase for Gateway cloning |  |
| Chemical | Gateway BP Clonase II Enzyme mix                                              | Invitrogen, 11789                       | Recombinase for Gateway cloning |  |

|                |                                                      |                          |  |  |
|----------------|------------------------------------------------------|--------------------------|--|--|
| Chemical       | Urea                                                 | AnalytiChem, CL00.2102   |  |  |
| Chemical       | 1 M Triethylammonium bicarbonate buffer              | Sigma-Aldrich, T7408     |  |  |
| Chemical       | Tris(carboxyethyl)phosphine (TCEP)                   | Thermo Scientific, 20490 |  |  |
| Chemical       | Iodoacetamide                                        | Sigma-Aldrich, I1149     |  |  |
| Chemical       | Acetonitrile (ACN)                                   | Biosolve, 012078         |  |  |
| Chemical       | Trifluoroacetic acid (TFA)                           | Biosolve, 202341         |  |  |
| Chemical       | 30% Ammonium hydroxide solution (NH <sub>4</sub> OH) | Sigma-Aldrich, 221228    |  |  |
| Chemical       | Formic acid                                          | Supelco, 100264          |  |  |
| Chemical       | Bromocresol Purple                                   | Sigma-Aldrich, 114375    |  |  |
| Commercial kit | 4–20% mini-PROTEAN TGX stain-free precast gels       | Biorad, 4568093          |  |  |
| Commercial kit | Trans-Blot Turbo mini PVDF transfer packs            | Biorad, 1704156          |  |  |
| Commercial kit | SuperSignal West Femto maximum sensitivity substrate | Thermo Scientific, 34095 |  |  |
| Commercial kit | 4x NuPAGE LDS sample buffer                          | Invitrogen, NP0007       |  |  |
| Commercial kit | 10x NuPAGE sample reducing agent                     | Invitrogen, NP0009       |  |  |
| Commercial kit | InstantBlue Coomassie protein stain                  | Abcam, ab119211          |  |  |
| Commercial kit | GFP-Trap magnetic agarose                            | Chromotek, gtma          |  |  |
| Commercial kit | RFP-Trap magnetic agarose                            | Chromotek, rtma          |  |  |
| Commercial kit | Pierce anti-HA magnetic beads                        | Thermo Scientific, 88837 |  |  |
| Commercial kit | Glutathione Sepharose 4B                             | Cytiva, 17-0756-01       |  |  |
| Commercial kit | PureCube 100 Ni-INDIGO agarose                       | Cube Biotech, 75105      |  |  |

|                |                                                     |                               |                                      |   |
|----------------|-----------------------------------------------------|-------------------------------|--------------------------------------|---|
| Commercial kit | Pierce 660 nm protein assay kit                     | Thermo Scientific, 22662      |                                      |   |
| Commercial kit | C18 ODS SampliQ solid phase extraction (SPE) column | Agilent, 5982-1165            | Protein desalting                    |   |
| Commercial kit | MagReSyn Ti-IMAC magnetic microspheres              | ReSyn Biosciences, MR-TIM0010 | Phosphopeptide enrichment            |   |
| Commercial kit | OMIX C18 pipette tips                               | Agilent, A57003100            | Protein desalting                    |   |
| Commercial kit | ReliaPrep RNA miniprep systems                      | Promega, Z6112                | Total RNA extraction                 |   |
| Commercial kit | qScript cDNA synthesis kit                          | Quantabio, 95047              | Complementary DNA synthesis          |   |
| Commercial kit | LightCycler 480 SYBR Green I master                 | Roche, 04887352001            |                                      |   |
| Commercial kit | QIAprep Spin Miniprep Kit                           | Qiagen, 27104                 | Plasmid extraction                   |   |
| Commercial kit | SapphireAmp Fast PCR Master Mix                     | Takara, RR350A                |                                      |   |
| Antibody       | Anti-GFP HRP                                        | Miltenyi Biotec, 130-091-833  | 1:5000, 5% skim milk in PBST or TBST |   |
| Antibody       | Anti-RFP                                            | Chromotek, 6G6                | 1:2000, 5% skim milk in PBST or TBST |   |
| Antibody       | Anti-mouse HRP                                      | Cytiva, NXA931                | 1:5000, 5% skim milk in PBST or TBST |   |
| Antibody       | Anti-HA HRP                                         | Abcam, ab1190                 | 1:10000, 5% skim milk in PBST        |   |
| Antibody       | Anti-thiophosphate ester                            | Abcam, ab92570                | 1:5000, 5% skim milk in TBST         |   |
| Antibody       | Anti-rabbit HRP                                     | Cytiva, NA934                 | 1:10000, 5% skim milk in TBST        |   |
| Software       | MaxQuant (version 2.1.4.0)                          |                               | Protein spectrum searching           | 4 |
| Software       | Perseus (version 2.0.10.0)                          |                               | Phosphoproteome data analysis        | 5 |
| Software       | PhosR                                               |                               | Data imputation                      | 6 |
| Software       | BLASTp (web interface)                              |                               | Protein BLAST                        | 7 |
| Software       | Clustal Omega (web interface)                       |                               |                                      | 8 |

|          |                                                           |  |                                       |    |
|----------|-----------------------------------------------------------|--|---------------------------------------|----|
| Software | Interactive Tree Of Life (iTOL, version 6, web interface) |  |                                       | 9  |
| Software | AlphaFold2 and AlphaFold3 server (web interface)          |  | Protein structure prediction          | 10 |
| Software | NAMD (version 3.0b6)                                      |  | Molecular dynamics (MD) simulation    | 11 |
| Software | CHARMM36m force field                                     |  | MD simulation parameters              | 12 |
| Software | CHARMM-GUI (web interface)                                |  | System manipulation for MD simulation | 13 |
| Software | MDAnalysis (version 2.9.0)                                |  | Analysis for MD simulation results    | 14 |
| Software | Matplotlib (version 3.10.1)                               |  | Figure plotting                       | 15 |
| Software | Seaborn (version 0.13.2)                                  |  | Figure plotting                       | 16 |
| Software | R (version 4.2)                                           |  |                                       |    |
| Software | Python (version 3.11)                                     |  |                                       |    |
| Software | Fiji (ImageJ, version 1.54g)                              |  | Image analysis                        | 17 |

## Supplementary methods

### Constructs, mutants and transgenic lines

To generate the CRISPR-edited *ubp24* mutant (*ubp24-crispr*), three guide RNA oligomer pairs were respectively annealed and assembled with pGG-A-AtU6-26-BbsI-ccdB-BbsI-B, pGG-B-AtU6-26-BbsI-ccdB-BbsI-C, and pGG-C-AtU6-26-BbsI-ccdB-BbsI-D<sup>18</sup> by BbsI-HF followed by T4 DNA ligase-mediated ligation. The three entry vectors and pJET-D-linkerII-G were introduced into pFASTRK-AG<sup>18</sup> by BsaI-HFv2 and T4 DNA ligase.

To generate lines expressing *UBP24:YFP-UBP24*, *UBP24:YFP-UBP24(S360A)*, *UBP24:YFP-UBP24(S360D)* in *ubp24-1*, the wild-type *UBP24* coding sequence (CDS) was optimised and synthesised to remove BsaI cutting sites (Twist Bioscience). The synthesised *UBP24* CDS fragment was first assembled into BsaI-linearised pEN-L1-AG-L2<sup>19</sup> by BsaI-HFv2 digestion followed by T4 DNA ligase-mediated ligation. The S360A and S360D mutation on *UBP24* CDS were generated by overlapping polymerase chain reaction, assembled into pEN-L1-AG-L2<sup>19</sup> by same method described above. The 1072 bp *UBP24* promoter cloned from wild-type Col-0 genomic DNA, *YFP* cloned from pGG-D-YFP-E<sup>20</sup>, *UBP24* variant CDS cloned from vectors described previously, and NOS terminator cloned from pGG-E-NOST-F<sup>18</sup> were assembled into BsaI-linearised pGGB-AG<sup>18</sup> by NEBuilder HiFi DNA Assembly kit. The optimised *UBP24* coding sequence for synthesis is provided in [Supplementary Table 1](#).

To generate wild-type and ubiquitylation-deficient lines expressing *AHA1:RFP-AHA1(WT)* and *AHA1:RFP-AHA1(5KR)* in wild-type and *ubp24-1*, the *AHA1* CDS cloned from wild-type complementary DNA was assembled into BsaI-linearised pEN-L1-AG-L2<sup>19</sup> by NEBuilder HiFi DNA Assembly kit.. The synthesised *AHA1(5KR)* DNA fragment was assembled with pTwist ENTR (Twist Bioscience). The resulting entry vectors were then recombined into the destination vector pB7WGR2 by Gateway LR Clonase II Enzyme mix to generate *35S:RFP-AHA1(WT)* and *35S:RFP-AHA1(5KR)*. The 3417 bp *AHA1* promoter cloned from wild-type Col-0 genomic DNA, and *RFP-AHA1* variants-35S terminator cloned from pB7WGR2 containing *AHA1* variant sequences were assembled into BsaI-linearised pGGH-AG<sup>18</sup> by NEBuilder HiFi DNA Assembly kit.

Final expression vectors were transformed into *Agrobacterium tumefaciens* strain C58C1 by heat shock. The *Arabidopsis* transformation was conducted by floral dipping. All primers used are provided in [Supplementary Table 1](#).

For co-IP, to generate *35S:GFP-UBP24*, the entry vector pEN-L1-AG-L2<sup>19</sup> containing *UBP24* CDS was recombined into the destination vector pB7WGF2 by Gateway LR Clonase II Enzyme

mix. The *35S:3×HA-OST1* was described previously<sup>2</sup>. The *35S:RFP-AHA1* was described above in this study.

To generate constructs for recombinant protein expression, the wild-type and S360A *UBP24* fragments (311 to 411 amino acids) were cloned from pEN-L1-AG-L2<sup>19</sup> containing *UBP24* CDS variants. The *GST* CDS was cloned from pDEST15 (Invitrogen). The *UBP24* CDS fragment and *GST* CDS were assembled with BsaI-linearised pDEST-RC-BG by NEBuilder HiFi DNA Assembly kit. The wild-type and S175A *OST1* fragments (125 to 225 amino acids) were cloned from pDEST-HisMBP containing *OST1* CDS<sup>2</sup>. The *OST1* fragments replaced the linker II of pGG-C-linkerII-G by BsaI-HFv2 and T4 DNA ligase. The *OST1* fragment from pGG-C-OST1-G and *GST* from pGG-B-GST-C were assembled into pDEST-RC-BG by BsaI-HFv2 and T4 DNA ligase. The CDS of RAF20 kinase domain were cloned from wild-type *Arabidopsis* complementary DNA and assembled with BsaI-linearised pEN-L1-AG-L2<sup>19</sup> by NEBuilder HiFi DNA Assembly kit. The entry vector containing CDS of RAF20 kinase domain were then recombined into the destination vector pDEST-HisMBP<sup>21</sup> by Gateway LR Clonase II Enzyme mix. All primers used are provided in [Supplementary Table 1](#).

To generate HA-tagged ubiquitin, *UBQ1* CDS was synthesised (Twist Bioscience) and assembled into linearised pDONR221 by NEBuilder HiFi DNA Assembly kit. The entry vector together with pEN-L4-3×HA-R1 was recombined into the destination vector pB7m24GW2 by Gateway LR Clonase II Enzyme mix. To generate an enzyme-dead mutation of *UBP24*, the C206S mutation on *UBP24* CDS were generated by overlapping polymerase chain reaction, assembled into pEN-L1-AG-L2<sup>19</sup> by BsaI-HFv2 digestion followed by T4 DNA ligase-mediated ligation. Final expression vectors were transformed into *Agrobacterium tumefaciens* strain C58C1 by heat shock. The *35S:GFP-UBP24* and *35S:RFP-AHA1* was described above in this study. To generate constructs for HA-tagged single lysine K48 and K63 ubiquitin, the ubiquitin CDS fragments were generated by three pairs of annealed primers with mutations and assembled into BsaI-linearised pEN-L1-AG-L2<sup>19</sup> by NEBuilder HiFi DNA Assembly kit. The entry vector together with pEN-L4-3×HA-R1 was recombined into the destination vector pB7m24GW2 by Gateway LR Clonase II Enzyme mix. Final expression vectors were transformed into *Agrobacterium tumefaciens* strain C58C1 by heat shock. All primers used are provided in [Supplementary Table 1](#).

For BiFC, *UBP24* CDS, *AHA1* CDS and *GST* CDS cloned from pDEST15 (Invitrogen) were firstly recombined into pDONR221 P3-P2, pDONR221 P1-P4 and pDONR221 P1-P4, respectively, by Gateway BP Clonase II Enzyme mix. The pDONR221 P1-P4 containing *OST1* CDS was described previously<sup>2</sup>. To generate constructs for BiFC, two indicated protein CDSs

from the entry vectors were recombined into the destination vector pBiFCt-2in1-NN<sup>22</sup> by Gateway LR Clonase II Enzyme mix. All primers used are provided in [Supplementary Table 1](#).

### **Yeast strain construction**

The sgRNA/Cas9 vector pV1382 (Addgene plasmid #111436) was obtained from Gerald Fink<sup>23</sup>. The plasmid was linearised using BsmBI-v2. 20-nucleotide guide RNAs (sgRNAs) targeting the *UBP3* locus (upstream and inside *UBP3* coding sequence) were designed using CRISPOR web tool<sup>24</sup>, flanked by homology arms matching the overhangs generated via the linearization, and synthesised as complementary 5'-phosphorylated oligonucleotides ([Supplementary Table 1](#)) by Integrated DNA Technologies. The sgRNA oligonucleotides were hybridised and ligated into the linearised plasmid using T4 DNA ligase, followed by heat-shock transformation into *E. coli* strain DH5 $\alpha$ . Plasmids were extracted using QIAprep Spin Miniprep Kit. For the *UBP3* deletion, a 90-bp repair DNA template was synthesised, containing 45-bp homology arms flanking the *UBP3* coding sequence and the Cas9-targeted site located upstream of the gene. To introduce the *ubp3*<sup>E691A</sup> mutation, the repair template was designed to contain homology arms flanking the Cas9 cleavage site and to bear required mutation (GAG codon substituted with GCC). *S. cerevisiae* cells were co-transformed with the sgRNA/Cas9 plasmid and the repair template using high-efficiency DMSO/lithium acetate/polyethylene glycol protocol<sup>25</sup>. Transformants were selected on YPD medium (1% yeast extract, 2% peptone, 2% glucose) containing nourseothricin (cloNAT, 100  $\mu$ g/mL), and successful edits were verified via PCR using SapphireAmp Fast PCR Master Mix and Sanger sequencing. The strains employed in the present work are summarised in [Supplementary Table 2](#).

### **Stomatal bioassay by imprinting**

The procedure was described previously<sup>26,27</sup> with some modification. 21-day-old *Arabidopsis* seedlings were firstly incubated at 21°C under darkness for 2 hours, and then transferred to a 42°C dark incubator for 2 hours. The abaxial epidermis of the third true leaves was negatively imprinted by the mixture of the catalyst and polysiloxane (3M ESPE Express light body). After totally solidification, the mixture was departed from the leaves and made a positive imprint with transparent nail varnish. The positive imprints were imaged by a TM1000 scanning electron microscope (Hitachi). The stomatal apertures (stomatal width divided by length) were measured from the images by Fiji (ImageJ) software.

### **MG132 treatment**

The 10-day-old *Arabidopsis* seedlings grown on ½ MS plates containing 1% sucrose, 0.5% MES and 0.8% (w/v) plant agar, pH adjusted to 5.7 with KOH were transferred to 12-well plates containing ½ MS medium containing 1% sucrose, 0.5% MES and 50 µM MG132, pH adjusted to 5.7 with KOH. After incubation for 16 hours, the seedlings were ground by liquid nitrogen, homogenised in 1x Laemmli sample buffer (62.5 mM Tris base, 2% SDS and 10% glycerol, pH adjusted to 6.8 with HCl) and incubated at 70°C for 10 minutes prior to SDS-PAGE and western blotting.

### **Gene expression**

10-day-old *Arabidopsis* seedlings grown at 21°C under the long day condition were harvested for gene expression. Total RNA was extracted using ReliaPrep RNA miniprep systems. The synthesis of complementary DNA was performed with 1 µg of RNA with a qScript cDNA synthesis kit. Quantitative reverse transcription polymerase chain reaction was performed on a LightCycler 480 (Roche Diagnostics) with LightCycler 480 SYBR Green I master. All steps were followed according to the manufacturer's guidelines. All primers used are provided in [Supplementary Table 1](#).

### **Root acidification assay**

The procedure was described previously<sup>28</sup> with some modification. Seeds were germinated on regular ½ MS plates containing 1% sucrose, 0.5% MES and 0.8% (w/v) plant agar, pH adjusted to 5.7 with KOH. After 10-day growing under the long day condition at 21°C, the seedlings were washed with Milli-Q water and transferred to a ½ MS plate containing 1 mM CaSO<sub>4</sub>, 0.8% (w/v) plant agar and 0.006% bromocresol purple, pH adjusted to 5.7 with HCl and KOH. The images were taken after additional 10-day growing.

### **Root growth assay**

Seeds were germinated on regular ½ MS plates containing 1% sucrose, 0.5% MES and 1% (w/v) plant agar, pH adjusted to 5.7 with KOH. After 7-day vertically growing under the continuous light condition at 21°C, the seedlings on plates were imaged with scanner Expression 11000XL (Epson). The primary root length was measured by Fiji (ImageJ) software.



## Ubiquitylation assay for chain type determination

35S:*RFP-AHA1* or 35S:*RFP-AHA1(5KR)* was co-infiltrated with 35S:3×*HA-UBQ1*, 35S:3×*HA-Ub(K48)* or 35S:3×*HA-Ub(K63)* into *Nicotiana* leaves. One day before harvesting, the leaves were treated with 1 μM concanamycin A. The materials were ground with liquid nitrogen and homogenised with extraction buffer. The soluble protein extract was incubated with Pierce anti-HA magnetic beads at 4°C for 1 hour. After washing three times with the extraction buffer, the beads were resuspended in 1x NuPAGE LDS sample buffer and then incubate at 70°C for 10 minutes. The supernatants were loaded on the gel for SDS-PAGE and western blotting.

## Supplementary references

1. Vu, L. D. et al. The membrane-localized protein kinase MAP4K4/TOT3 regulates thermomorphogenesis. *Nat. Commun.* 12, 2842 (2021).
2. Xu, X. et al. Stomatal opening under high temperatures is controlled by the OST1-regulated TOT3–AHA1 module. *Nat. Plants* 1–13 (2024).
3. Baker Brachmann, C. et al. Designer deletion strains derived from *Saccharomyces cerevisiae* S288C: A useful set of strains and plasmids for PCR-mediated gene disruption and other applications. *Yeast* 14, 115–132 (1998).
4. Cox, J. & Mann, M. MaxQuant enables high peptide identification rates, individualized p.p.b.-range mass accuracies and proteome-wide protein quantification. *Nat. Biotechnol.* 26, 1367–1372 (2008).
5. Tyanova, S. et al. The Perseus computational platform for comprehensive analysis of (prote)omics data. *Nat. Methods* 13, 731–740 (2016).
6. Kim, H. J. et al. PhosR enables processing and functional analysis of phosphoproteomic data. *Cell Rep.* 34, 108771 (2021).
7. Camacho, C., Boratyn, G. M., Joukov, V., Vera Alvarez, R. & Madden, T. L. ElasticBLAST: accelerating sequence search via cloud computing. *BMC Bioinformatics* 24, 117 (2023).
8. Madeira, F. et al. The EMBL-EBI Job Dispatcher sequence analysis tools framework in 2024. *Nucleic Acids Res.* 52, W521–W525 (2024).
9. Letunic, I. & Bork, P. Interactive Tree of Life (iTOL) v6: recent updates to the phylogenetic tree display and annotation tool. *Nucleic Acids Res.* 52, W78–W82 (2024).

10. Abramson, J. et al. Accurate structure prediction of biomolecular interactions with AlphaFold 3. *Nature* 630, 493–500 (2024).
11. Phillips, J. C. et al. Scalable molecular dynamics with NAMD. *J. Comput. Chem.* 26, 1781–1802 (2005).
12. Best, R. B. et al. Optimization of the additive CHARMM all-atom protein force field targeting improved sampling of the backbone  $\phi$ ,  $\psi$  and side-chain  $\chi_1$  and  $\chi_2$  dihedral angles. *J. Chem. Theory Comput.* 8, 3257–3273 (2012).
13. Jo, S., Kim, T., Iyer, V. G. & Im, W. CHARMM-GUI: A web-based graphical user interface for CHARMM. *J. Comput. Chem.* 29, 1859–1865 (2008).
14. Michaud-Agrawal, N., Denning, E. J., Woolf, T. B. & Beckstein, O. MDAAnalysis: A toolkit for the analysis of molecular dynamics simulations. *J. Comput. Chem.* 32, 2319–2327 (2011).
15. Hunter, J. D. Matplotlib: A 2D graphics environment. *Comput. Sci. Eng.* 9, 90–95 (2007).
16. Waskom, M. L. Seaborn: Statistical data visualization. *J. Open Source Softw.* 6, 3021 (2021).
17. Schindelin, J. et al. Fiji: an open-source platform for biological-image analysis. *Nat. Methods* 9, 676–682 (2012).
18. Decaestecker, W. et al. CRISPR-TSKO: a technique for efficient mutagenesis in specific cell types, tissues, or organs in Arabidopsis. *Plant Cell* 31, 2868–2887 (2019).
19. Houbaert, A. et al. POLAR-guided signalling complex assembly and localization drive asymmetric cell division. *Nature* 563, 574–578 (2018).
20. Blomme, J., Liu, X., Jacobs, T. B. & De Clerck, O. A molecular toolkit for the green seaweed *Ulva mutabilis*. *Plant Physiol.* 186, 1442–1454 (2021).
21. Nallamsetty, S., Austin, B. P., Penrose, K. J. & Waugh, D. S. Gateway vectors for the production of combinatorially-tagged His6-MBP fusion proteins in the cytoplasm and periplasm of *Escherichia coli*. *Protein Sci.* 14, 2964–2971 (2005).
22. Grefen, C. & Blatt, M. R. A 2in1 cloning system enables ratiometric bimolecular fluorescence complementation (rBiFC). *BioTechniques* (2012) doi:10.2144/000113941.
23. Vyas, V. K. et al. New CRISPR mutagenesis strategies reveal variation in repair mechanisms among fungi. *mSphere* 3, 10.1128/msphere.00154-18 (2018).
24. Concordet, J.-P. & Haeussler, M. CRISPOR: intuitive guide selection for CRISPR/Cas9 genome editing experiments and screens. *Nucleic Acids Res.* 46, W242–W245 (2018).

25. Pan, X. et al. A robust toolkit for functional profiling of the yeast genome. *Mol. Cell* 16, 487–496 (2004).
26. Jinn, T.-L. Using silicon polymer impression technique and scanning electron microscopy to measure stomatal apertures. *BIO-Protoc.* 7, (2017).
27. Scarpeci, T., Zanol, M. & Valle, E. Estimation of stomatal aperture in *Arabidopsis thaliana* using silicone rubber imprints. *Bio-Protoc.* 7, (2017).
28. Silva, A., Dressano, K., Ceciliato, P., Guerrero-Abad, J. C. & Moura, D. Evaluation of root pH change through gel containing pH-sensitive indicator bromocresol purple. *Bio-Protoc.* 8, (2018).
