# Supplementary material for: Evolutionary tuning of molecular charge state of UBP24 shapes eukaryotic responses to high temperature
Source: Research Square preprint supplement (doi:10.21203/rs.3.rs-7157930/v1), 2025-11-11
Supplement: Supplementary file 2 [file 0e57febe65eec72b66f6a4ef.xlsx]

## Sheet: Sup. Data 1a
Supplementary Data 1a. 1657 high-quality phosphosites identified from 21°C and 35°C treated 14-day-old Arabidopsis seedlings.
Protein	Site	Residue	Scaled intensity.WT_21deg_rep1	Scaled intensity.WT_21deg_rep2	Scaled intensity.WT_21deg_rep3	Scaled intensity.WT_21deg_rep4	Scaled intensity.WT_35deg_rep1	Scaled intensity.WT_35deg_rep2	Scaled intensity.WT_35deg_rep3	Scaled intensity.WT_35deg_rep4	log Fold change (35deg-vs-21deg)	One-tailed Student's T-test -log10 p-value 21deg>35deg	One-tailed Student's T-test -log10 p-value 21deg<35deg	Proteins	Positions within proteins	Raw intensity.WT_21deg_rep1	Raw intensity.WT_21deg_rep2	Raw intensity.WT_21deg_rep3	Raw intensity.WT_21deg_rep4	Raw intensity.WT_35deg_rep1	Raw intensity.WT_35deg_rep2	Raw intensity.WT_35deg_rep3	Raw intensity.WT_35deg_rep4	Localization prob	Score diff	PEP	Score	Delta score	Score for localization	Number of Phospho (STY)	Phospho (STY) Probabilities	Phospho (STY) Score diffs	Charge	Mass error [ppm]
AT1G01050.2	24	S	25.0709	24.345	24.6188	24.6487	24.1381	23.8571	24.1961	24.3594	-0.533175	1.87423	0.00584084	AT1G01050.2;AT1G01050.1	24;24	30221000	40617000	24197000	24000000	47005000	23750000	20464000	16493000	0.995921	23.877	7.29806e-38	150.4	20.933	150.4	1	ILS(0.996)S(0.004)LSR	ILS(24)S(-24)LS(-64)R	2	0.031086
AT1G01100.3	86	S	23.8178	25.5046	23.9931	25.6199	26.9991	27.049	27.3965	26.2804	2.1974	0.00136322	2.50396	AT1G01100.3;AT1G01100.4;AT1G01100.2;AT1G01100.1;AT5G47700.2;AT5G47700.1;AT4G00810.2;AT4G00810.1	86;102;102;102;103;103;103;103	12679000	90736000	15682000	47053000	341500000	217040000	188100000	62455000	1	79.5108	0	316.58	307.05	79.511	1	KKDEPAEES(1)DGDLGFGLFD	KKDEPAEES(80)DGDLGFGLFD	2	0.072779
AT1G01320.2	1120	S	18.8627	20.1374	16.801	20.0812	20.0183	21.5874	20.2651	24.0951	2.5209	0.0185778	1.37804	AT1G01320.2;AT1G01320.3;AT1G01320.1	1120;1120;1128	408750	2198400	107240	1012200	0	4925100	1341600	0	0.970265	15.1365	2.89529e-16	115.42	108.91	115.42	1	GHLS(0.97)VS(0.03)DLLDYINPSHNAK	GHLS(15)VS(-15)DLLDY(-57)INPS(-110)HNAK	3	-0.1283
AT1G01790.2	120	S	19.4664	19.6183	19.1483	18.9973	19.8719	20.1265	20.5802	21.572	1.23008	0.00479624	1.95929	AT1G01790.2;AT1G01790.1	120;120	621120	1534000	0	477510	2442700	1789100	0	0	0.902752	9.68346	5.00975e-30	146.16	122.92	146.16	1	IGESSES(0.903)S(0.097)DETEATDLK	IGES(-63)S(-50)ES(9.7)S(-9.7)DET(-38)EAT(-66)DLK	2	0.49147
AT1G01960.1	588	S	20.8179	21.2442	21.1405	20.8338	20.903	20.9657	20.8909	20.9299	-0.086725	0.640945	0.112714	AT1G01960.1	588	1585000	4734500	2171100	1705400	4991900	3200800	2070200	1530800	0.999164	30.8518	0	301.82	289.05	290.42	1	S(0.001)DS(0.999)QSELSSGNSDALAIEQR	S(-31)DS(31)QS(-48)ELS(-170)S(-200)GNS(-230)DALAIEQR	2	0.22171
AT1G02080.2	923	S	16.0345	19.0567	17.8175	19.5579	18.4885	18.9547	19.3847	19.2983	0.9149	0.0711087	0.820931	AT1G02080.2;AT1G02080.3;AT1G02080.1	923;923;977	57553	1039400	216950	704250	936370	794120	728800	494040	1	82.1829	1.5629e-09	104.41	93.309	104.41	1	FGS(1)ALNIETLVAAAER	FGS(82)ALNIET(-82)LVAAAER	2	0.31277
AT1G02120.3	42	S	18.628	17.6617	17.4134	16.8608	15.9525	17.1382	16.955	17.563	-0.7388	1.01769	0.0438359	AT1G02120.3;AT1G02120.2;AT1G02120.1	42;42;42	347370	395230	163950	108600	0	225460	135270	148380	0.99781	26.6067	5.23876e-07	92.932	84.366	92.932	1	GS(0.998)PDRHDPS(0.002)TSSPSPSR	GS(27)PDRHDPS(-27)T(-50)S(-64)S(-78)PS(-87)PS(-92)R	3	0.11174
AT1G02840.5	131	S	17.6158	16.7166	18.6879	18.2772	20.3632	23.5294	21.606	21.0567	3.81445	0.000691948	2.79818	AT1G02840.5;AT1G02840.4;AT1G02840.3;AT1G02840.2;AT1G02840.1	131;131;131;131;131	172220	0	0	289880	0	18925000	3398600	1671400	0.984229	18.8915	1.5629e-09	104.41	86.308	101.42	1	VLVTGLPS(0.003)S(0.013)AS(0.984)WQDLK	VLVT(-74)GLPS(-25)S(-19)AS(19)WQDLK	2	-0.1802
AT1G02990.1	206	S	18.0054	16.8789	17.53	18.1972	17.6993	17.5848	18.5069	17.6781	0.2144	0.147842	0.539812	AT1G02990.1;AT1G02990.5;AT1G02990.2;AT1G02990.6;AT1G02990.4;AT1G02990.3	206;246;206;246;246;246	0	0	177750	274240	541820	307260	0	160710	0.991892	20.9465	0.000504286	54.234	40.572	51.774	1	DQLLS(0.992)PLS(0.008)DDLIQLGSK	DQLLS(21)PLS(-21)DDLIQLGS(-39)K	2	-0.30914
AT1G03350.1	64	S	18.6672	17.0814	17.5108	16.9413	17.1203	17.1483	16.7489	17.1941	-0.497275	0.877394	0.0617901	AT1G03350.1	64	0	264330	175400	114830	362730	227050	0	114900	0.99843	28.0672	0.000201148	71.349	44.02	71.349	1	S(0.002)ES(0.998)VIETYR	S(-28)ES(28)VIET(-51)Y(-54)R	2	-0.12729
AT1G03350.1	434	S	18.2033	16.3765	17.9545	17.1732	17.5716	13.6179	13.6395	14.0777	-2.7002	1.68993	0.00896053	AT1G03350.1	434	258790	162160	0	0	495940	0	0	0	0.997602	26.192	5.93105e-07	93.345	49.21	93.345	1	S(0.002)GGS(0.998)PNRAELR	S(-26)GGS(26)PNRAELR	2	0.77117
AT1G03530.1	235	S	17.2156	15.7642	17.9279	17.902	15.9635	17.4062	18.1078	17.7716	0.10985	0.251486	0.356962	AT1G03530.1	235	0	106080	234210	223490	0	271490	300770	171470	1	64.2291	0.000599544	75.669	55.355	75.669	1	VSLAVDDDEKS(1)DEAK	VS(-64)LAVDDDEKS(64)DEAK	2	0.34282
AT1G03590.1	448	S	19.5971	19.2817	19.3598	19.3241	18.6277	18.4612	18.8611	21.1166	-0.124025	0.371853	0.240153	AT1G03590.1;AT4G03415.3;AT4G03415.2;AT4G03415.1	448;454;454;454	680010	1214800	631880	598910	1031200	0	506980	0	1	72.6431	1.3726e-20	132.78	105.82	72.643	1	VNS(1)LVQLPR	VNS(73)LVQLPR	2	-0.75066
AT1G03910.1	406	S	20.1855	20.0943	20.758	20.1452	20.1071	19.8327	20.2112	19.8854	-0.28665	1.09419	0.0364492	AT1G03910.1;AT1G03910.2	406;450	1022500	2133700	1665500	1058100	2875300	1459500	1292400	742130	1	172.031	1.58791e-129	224.89	203.43	224.89	1	LEQLS(1)EGEDDVEVNPGLTR	LEQLS(170)EGEDDVEVNPGLT(-170)R	2	-0.1162
AT1G04530.1	88	S	21.5193	23.17	21.5268	23.2378	23.2599	22.9568	23.0421	23.0406	0.711375	0.0449302	1.00752	AT1G04530.1	88	2577300	17989000	2837800	9026200	25573000	12725000	9195900	6611300	1	48.0878	5.35433e-72	174.46	162.46	48.088	1	DELGFEIERPPS(1)PPMHLAAGLGIDK	DELGFEIERPPS(48)PPMHLAAGLGIDK	3	0.52768
AT1G04780.1	435	S	20.2954	19.9072	19.3929	19.6313	19.8198	19.5888	19.5713	19.237	-0.252475	0.809038	0.0732589	AT1G04780.1	435	1103400	1874100	646570	741010	2356100	1232500	829410	473490	0.900952	9.58856	1.04964e-28	139.58	124.71	107.14	1	VSDLLGDDDS(0.901)PS(0.099)R	VS(-98)DLLGDDDS(9.6)PS(-9.6)R	2	-1.4224
AT1G04920.1	156	S	16.1721	15.3045	16.7897	16.7318	18.6033	18.2545	19.2539	18.0501	2.29093	0.000404951	3.03049	AT1G04920.1	156	63314	0	106410	99310	1013900	0	0	207970	0.999964	44.4673	0.000359768	58.674	42.918	58.674	1	NLS(1)NLEIWSDDK	NLS(44)NLEIWS(-44)DDK	2	-0.029704
AT1G04950.3	434	S	14.9514	14.2097	11.1986	13.0984	16.2016	17.0726	17.716	17.6688	3.80023	0.00113978	2.58153	AT1G04950.3;AT1G04950.2;AT1G04950.1	434;434;434	0	0	0	0	0	215450	229230	159670	0.997596	26.3198	0.000394544	67.964	60.239	67.964	1	LSVDSS(0.002)ENQS(0.998)PQK	LS(-61)VDS(-41)S(-26)ENQS(26)PQK	2	-0.48952
AT1G05150.1	567	S	20.8656	21.1016	20.4606	19.8663	21.1149	20.7451	20.2523	19.9454	-0.0591	0.356688	0.251701	AT1G05150.1	567	1638300	4289000	1355300	872120	5781700	2747000	1329800	773670	0.967767	16.3273	5.64809e-21	132.81	127.2	121.79	1	DNDVPVSYS(0.968)GS(0.023)GGPT(0.009)K	DNDVPVS(-34)Y(-56)S(16)GS(-16)GGPT(-20)K	2	0.029391
AT1G05805.1	144	S	17.8532	18.5692	18.8979	19.0449	18.7107	19.5296	19.357	18.889	0.530275	0.035483	1.10539	AT1G05805.1	144	203030	741340	458790	493520	1092300	1182900	714940	372010	0.8728	8.38345	3.2004e-09	102.73	95.599	62.378	1	QRS(0.873)S(0.127)PADFFTYLASDK	QRS(8.4)S(-8.4)PADFFT(-33)Y(-41)LAS(-54)DK	2	-0.12285
AT1G05805.1	189	S	21.4343	21.6158	21.8454	21.618	21.6	21.5369	21.5248	21.4658	-0.0965	0.798917	0.0751446	AT1G05805.1	189	2429900	6125300	3539000	2936800	8092900	4755900	3212500	2219400	0.999999	59.4743	8.95809e-128	218.6	179.58	218.6	1	SQLS(1)FTNHDSLAR	S(-79)QLS(59)FT(-59)NHDS(-130)LAR	2	-0.28471
AT1G05805.1	28	S	21.5786	18.8725	21.3682	19.6413	19.7839	19.9491	19.9682	19.655	-0.5261	0.639613	0.11311	AT1G05805.1	28	0	914780	2542300	746150	2298200	0	1092100	632590	0.999105	30.4985	7.61441e-60	163.95	147.46	163.95	1	Y(0.001)GS(0.999)APGSFLNSVVDEVIGGGSSNAR	Y(-30)GS(30)APGS(-54)FLNS(-95)VVDEVIGGGS(-160)S(-160)NAR	2	-0.14909
AT1G05960.4	244	S	20.456	19.211	19.948	20.2847	19.7287	20.271	19.4927	19.8894	-0.129475	0.455809	0.187153	AT1G05960.4;AT1G05960.3;AT1G05960.1;AT1G05960.2	244;244;244;265	1233300	0	950000	0	2212000	1977600	785450	744190	0.999649	34.7652	0.00772432	52.887	25.238	52.254	1	KVS(1)FKPNPVTDYK	KVS(35)FKPNPVT(-35)DY(-48)K	3	0.90899
AT1G06070.1	413	S	19.9515	19.9973	19.2702	20.1768	19.7194	18.7324	18.8268	18.5995	-0.879425	1.76367	0.00754899	AT1G06070.1	413	869380	1994900	593830	0	2197700	680750	495080	304370	0.80863	6.3027	1.30377e-27	137.62	94.343	137.62	1	ES(0.001)VT(0.189)S(0.809)PDRET(0.001)PLTK	ES(-31)VT(-6.3)S(6.3)PDRET(-28)PLT(-100)K	2	-0.021495
AT1G06210.1	377	S	19.5629	19.6192	20.3067	19.9203	19.7779	19.6955	19.7501	20.0754	-0.02755	0.351765	0.255607	AT1G06210.1	377	664100	1535000	1218100	905400	2288700	1327100	938840	846600	0.936024	11.6527	2.74518e-39	153.38	138.23	134.08	1	IELGLS(0.936)S(0.064)DEDEK	IELGLS(12)S(-12)DEDEK	2	-0.76329
AT1G06410.3	5	S	20.8376	22.8506	20.6226	22.3735	23.6464	23.3443	23.0506	22.5105	1.46688	0.011289	1.59075	AT1G06410.3;AT1G06410.2;AT1G06410.1	5;5;5	1606800	14416000	1516300	4957900	33430000	16646000	9250200	4578500	0.998225	27.5012	0	302.34	264	301.04	1	S(0.998)YT(0.002)NLLDLASGNFPVMGR	S(28)Y(-160)T(-28)NLLDLAS(-270)GNFPVMGR	2	-0.048538
AT1G06680.1	147	S	19.3129	17.4923	20.1497	21.0009	18.201	18.0743	18.2997	18.0745	-1.32657	1.194	0.0287116	AT1G06680.1;AT1G06680.2	147;103	0	351430	1092500	1914800	767180	431390	343560	211520	0.991684	20.7668	1.26453e-54	159.81	128.7	159.81	1	S(0.992)IT(0.008)DYGSPEEFLSQVNYLLGK	S(21)IT(-21)DY(-54)GS(-68)PEEFLS(-130)QVNY(-150)LLGK	2	-0.14461
AT1G06680.1	159	S	21.7019	16.6461	19.8805	19.5947	18.7207	17.3675	19.0103	18.3116	-1.10328	0.748335	0.0853982	AT1G06680.1;AT1G06680.2	159;115	0	195490	906570	0	1099900	0	562230	249300	0.998662	28.8197	9.39637e-15	98.165	86.372	98.165	1	SITDYGSPEEFLS(0.999)QVNY(0.001)LLGK	S(-68)IT(-63)DY(-55)GS(-46)PEEFLS(29)QVNY(-29)LLGK	2	-0.39612
AT1G06840.1	783	S	19.5292	19.3003	19.1146	19.1146	19.1373	19.8928	19.2457	19.1875	0.10115	0.166014	0.498005	AT1G06840.1	783	648780	1230600	533120	517940	1468100	0	661870	457500	0.995207	26.1835	0.00246277	42.746	38.869	42.746	1	LAPVPDMEGIS(0.995)PQHVS(0.002)T(0.002)VVK	LAPVPDMEGIS(26)PQHVS(-26)T(-26)VVK	3	0.32042
AT1G07110.1	244	S	17.2646	17.6687	16.1171	17.4597	17.4893	18.0601	17.1012	17.6837	0.45605	0.0700368	0.827006	AT1G07110.1;AT3G30200.1	244;154	135010	397130	0	164480	468450	0	0	161330	0.897213	9.90829	9.47837e-05	70.281	59.019	46.3	1	NSEDSGVT(0.011)VDGS(0.897)PS(0.092)AK	NS(-41)EDS(-33)GVT(-19)VDGS(9.9)PS(-9.9)AK	2	-0.073179
AT1G07110.1	216	S	19.792	19.0675	19.5528	19.6474	18.4499	12.1411	12.306	13.5913	-5.39285	2.25942	0.00239652	AT1G07110.1	216	778410	1047200	722350	749330	911630	0	0	0	0.993498	23.0014	0.000347021	59.426	15.108	59.426	1	SLS(0.993)AS(0.005)GS(0.001)FR	S(-33)LS(23)AS(-23)GS(-30)FR	2	0.51895
AT1G07110.1	220	S	22.71	22.3225	22.7883	23.1339	22.4709	22.3561	22.8388	23.1541	-0.0337	0.34887	0.257941	AT1G07110.1	220	5883000	9997400	6803300	8399000	14800000	8391400	7987400	7152500	0.999974	45.8403	7.37467e-77	190.86	97.21	162.36	1	SLSASGS(1)FR	S(-140)LS(-100)AS(-46)GS(46)FR	2	-0.067002
AT1G07110.1	303	S	22.5257	24.3928	23.9966	24.1992	24.6125	24.7759	24.8042	25.32	1.09957	0.0112244	1.59322	AT1G07110.1	303	5177600	41986000	15720000	17575000	65303000	44901000	31191000	32098000	0.999992	53.1241	1.1318e-170	241.35	205.7	228.61	1	SLS(1)ASSFLIDTK	S(-56)LS(53)AS(-53)S(-73)FLIDT(-170)K	2	-0.23335
AT1G07110.1	271	S	17.5944	16.842	18.0244	17.3534	17.4856	17.5148	17.9609	17.3942	0.135325	0.16837	0.492989	AT1G07110.1	271	169690	0	250410	152800	467250	292720	0	132000	0.99834	27.8043	0.000294804	58.676	50.163	58.676	1	S(0.998)VET(0.002)LSPFQQK	S(28)VET(-28)LS(-53)PFQQK	2	-0.18378
AT1G07110.1	276	S	21.2142	21.0887	21.6088	21.1402	20.1521	20.1387	20.2229	19.9329	-1.15132	4.17312	2.90987e-05	AT1G07110.1	276	2086000	4250700	3003700	2108900	2966500	1804300	1303000	767000	1	87.7694	3.01793e-94	202.16	179.42	201.46	1	SVETLS(1)PFQQK	S(-150)VET(-88)LS(88)PFQQK	2	0.03654
AT1G07400.1	16	S	12.4995	14.2269	12.7293	13.6454	16.0163	16.1789	18.2384	15.7512	3.27092	0.000735449	2.77151	AT1G07400.1	16	0	0	0	0	168750	115960	329270	42263	0.889649	9.06442	5.26484e-10	103.61	87.21	103.61	1	S(0.11)NS(0.89)IFDPFSLDVWDPFK	S(-9.1)NS(9.1)IFDPFS(-67)LDVWDPFK	2	0.20614
AT1G07650.4	776	S	21.0739	20.3524	19.9573	19.9361	20.1945	20.2623	19.8912	19.7901	-0.2954	0.760756	0.0827456	AT1G07650.4;AT1G07650.3;AT1G07650.1;AT1G07650.2	776;963;989;995	1892700	2551600	956140	915310	3055000	1965800	1035300	694710	0.998844	32.5959	2.46021e-11	110.84	58.56	64.439	1	SLS(0.999)FS(0.001)TSGPR	S(-33)LS(33)FS(-33)T(-40)S(-46)GPR	2	0.025063
AT1G07990.2	7	S	15.9307	19.7327	17.2714	18.9218	20.0957	19.9499	19.9252	19.5702	1.9211	0.0146054	1.48055	AT1G07990.2;AT1G07990.1	7;7	53560	1660600	148590	453150	2852700	1583000	1060000	596510	0.996432	27.1922	2.57553e-14	118.33	102.71	104.41	1	LT(0.002)S(0.996)LS(0.002)ASSPVEIILDK	LT(-27)S(27)LS(-28)AS(-44)S(-52)PVEIILDK	2	0.13522
AT1G07990.2	508	S	18.9744	20.916	18.9953	20.2578	22.2747	21.5123	21.2961	20.5309	1.61763	0.00786065	1.74625	AT1G07990.2;AT1G07990.1	508;508	441640	3771200	490810	1144000	12918000	4675200	2741500	1160900	0.999448	32.5916	1.63661e-85	188.54	178.03	124.82	1	T(0.001)RDS(0.999)DEEDRDYDVAALANNLSQAFR	T(-33)RDS(33)DEEDRDY(-58)DVAALANNLS(-110)QAFR	3	-0.1696
AT1G08420.2	970	S	20.759	20.506	21.1848	20.8175	20.5088	20.6309	20.817	20.5771	-0.183375	0.852191	0.0657758	AT1G08420.2;AT1G08420.1	970;975	1521600	2838300	2238800	1686200	3798400	2537900	1966900	1198700	0.877112	8.53764	9.5078e-16	114.69	104.63	93.684	1	LIHPLPPALS(0.123)S(0.877)PETSPER	LIHPLPPALS(-8.5)S(8.5)PET(-42)S(-49)PER	3	0.29313
AT1G08420.2	622	S	20.4324	21.1017	21.3344	20.635	20.8158	20.5988	20.4627	20.3162	-0.3275	0.980028	0.0480343	AT1G08420.2;AT1G08420.1;AT2G27210.2;AT2G27210.1	622;627;611;616	1213300	4289300	2483500	1485800	4699100	2482200	1538600	1000400	1	84.2893	1.27526e-109	208.08	184.1	84.289	1	QLS(1)IDQFENEGR	QLS(84)IDQFENEGR	2	0.084843
AT1G08420.2	653	S	21.1114	20.7747	20.0983	19.935	20.5467	20.3948	19.9548	19.9428	-0.270075	0.66945	0.104614	AT1G08420.2;AT1G08420.1;AT2G27210.2;AT2G27210.1	653;658;642;647	1942500	3419300	1054300	914620	3899600	2154900	1082000	772290	1	64.3356	1.59187e-18	100.92	73.783	100.92	1	QMS(1)INSVPK	QMS(64)INS(-64)VPK	2	-0.46614
AT1G08680.5	219	S	13.6999	14.4323	13.92	13.9975	16.8983	17.5369	18.1522	18.045	3.64567	6.51447e-06	4.82309	AT1G08680.5;AT1G08680.2;AT1G08680.1;AT1G08680.4	219;219;219;219	0	0	0	0	0	0	310160	207240	0.947147	13.2081	0.000227073	70.622	51.351	61.212	1	AS(0.947)DY(0.045)S(0.007)VSSAGDPFR	AS(13)DY(-13)S(-21)VS(-36)S(-37)AGDPFR	2	-0.35161
AT1G08680.5	196	S	19.1374	18.5636	19.1019	18.9001	18.2501	17.7349	18.0835	17.619	-1.00388	2.94682	0.00049103	AT1G08680.5;AT1G08680.2;AT1G08680.1;AT1G08680.4	196;196;196;196	494480	738480	0	0	793750	340960	295730	154250	0.999828	39.026	0.000137879	60.49	43.714	60.49	1;2	ASSFVYS(1)PGR	AS(-51)S(-44)FVY(-39)S(39)PGR	2	-0.53141
AT1G08680.5	236	S	17.6553	16.8658	18.546	17.969	18.2597	18.514	18.5612	18.3644	0.6658	0.0249084	1.25384	AT1G08680.5;AT1G08680.2;AT1G08680.1;AT1G08680.4;AT1G08680.3	236;236;236;236;194	177010	0	359480	234120	799050	585110	411810	258590	0.997662	26.3014	6.42429e-14	114.74	88.307	114.74	1	S(0.002)DIQS(0.998)PNFQQEAEFR	S(-26)DIQS(26)PNFQQEAEFR	2	-0.04342
AT1G08720.2	114	S	19.2566	19.2618	19.0673	18.8627	18.7252	18.8067	18.4701	18.4191	-0.506825	2.3399	0.00199015	AT1G08720.2;AT1G08720.1	114;114	537060	1198200	515950	434980	1103300	716720	386620	268600	0.995488	23.4374	1.10335e-09	102.87	76.358	85.845	1	AATLLS(0.005)LGS(0.995)HQR	AAT(-63)LLS(-23)LGS(23)HQR	2	-0.32583
AT1G08800.4	825	S	19.077	19.024	19.3375	19.0832	18.1368	18.5025	18.469	20.1419	-0.317875	0.591728	0.128438	AT1G08800.4;AT1G08800.3;AT1G08800.2;AT1G08800.1	825;825;825;825	0	1016100	622190	506780	733800	580480	386320	0	0.855042	7.84156	1.07474e-06	85.958	43.563	55.401	1	ALLT(0.004)QIS(0.855)AS(0.141)R	ALLT(-23)QIS(7.8)AS(-7.8)R	2	-0.12721
AT1G08800.4	190	S	17.6626	14.7141	15.2413	13.6603	17.5465	19.945	21.024	19.1579	4.09877	0.00230133	2.27699	AT1G08800.4;AT1G08800.3;AT1G08800.2;AT1G08800.1	190;190;190;190	177900	0	0	0	0	1577700	0	448220	0.976203	16.1303	2.05075e-10	112.34	80.511	112.34	1	S(0.024)VS(0.976)FNHLPDVGYTELK	S(-16)VS(16)FNHLPDVGY(-89)T(-84)ELK	2	-0.70183
AT1G09060.2	695	S	17.8793	18.1221	18.0411	17.4996	18.022	18.1677	17.0033	17.5539	-0.1988	0.578403	0.13312	AT1G09060.2;AT1G09060.1;AT1G09060.4;AT1G09060.3	695;695;709;709	206740	543780	253320	169090	677650	460240	139870	147450	0.99429	22.4242	0.00161846	69.602	62.912	53.252	1	MSENES(0.006)LLS(0.994)PEQK	MS(-47)ENES(-22)LLS(22)PEQK	2	-0.45949
AT1G09140.3	87	S	17.7273	17.2458	17.1388	17.2197	18.042	18.7716	18.8658	19.1734	1.3803	0.000515814	2.92562	AT1G09140.3;AT1G09140.2;AT1G09140.1	87;87;87	186060	296240	135540	139270	0	699470	508640	453050	0.999889	39.5634	3.47592e-13	118.71	21.764	118.71	1	RFS(1)PSVDR	RFS(40)PS(-40)VDR	2	-0.29173
AT1G09730.2	921	S	18.6453	18.8563	18.7883	18.5456	18.2453	18.3879	17.9091	18.1327	-0.540125	2.63832	0.00100003	AT1G09730.2;AT1G09730.1	921;953	351560	904590	425220	349130	791090	536130	262070	220230	0.889689	9.20181	0.00332563	57.348	29.606	44.616	1	LS(0.107)S(0.89)PT(0.003)GEAEEMEK	LS(-9.2)S(9.2)PT(-24)GEAEEMEK	2	0.084937
AT1G09780.1	80	S	21.5893	21.7438	21.8611	21.7241	21.8252	21.871	21.7965	21.4332	0.0019	0.295557	0.306573	AT1G09780.1;AT3G08590.2;AT3G08590.1	80;82;82	2705500	6693800	3577900	3160900	9459900	5995200	3878200	2169900	1	66.0427	8.6837e-143	225.05	215.59	225.05	1	AHGTAVGLPSEDDMGNS(1)EVGHNALGAGR	AHGT(-160)AVGLPS(-66)EDDMGNS(66)EVGHNALGAGR	3	0.046345
AT1G10140.1	136	S	16.4116	16.9286	16.9612	16.909	15.8755	16.7989	17.141	17.4684	0.01835	0.284778	0.317914	AT1G10140.1	136	74745	237770	119840	112290	0	178210	153880	138960	0.980992	17.1273	0.000211566	58.487	46.873	57.679	1	IEEEEET(0.019)EEGS(0.981)VNPK	IEEEEET(-17)EEGS(17)VNPK	2	-0.146
AT1G10290.1	533	S	13	21.2705	13.0389	13.5055	22.0029	21.1753	20.8346	21.2186	6.10412	0.00530328	1.91588	AT1G10290.1	533	0	4821500	0	0	10700000	3701300	1991000	0	0.99309	21.5751	8.70755e-29	140.6	125.91	140.6	1	AT(0.007)S(0.993)PQPDGPTAGGSLK	AT(-22)S(22)PQPDGPT(-99)AGGS(-110)LK	2	-0.55663
AT1G10290.1	529	S	17.2847	16.8178	16.6944	16.8508	18.5599	16.6921	17.7929	19.9352	1.3331	0.0229462	1.28849	AT1G10290.1	529	136910	220190	99608	0	983880	0	241790	0	0.980825	17.0885	5.42486e-11	106.49	75.942	106.49	1	GQDAEQS(0.019)LLS(0.981)R	GQDAEQS(-17)LLS(17)R	2	0.40384
AT1G59610.1	823	S	17.9844	16.4908	18.281	17.8683	16.6453	17.3582	17.9068	18.3744	-0.08495	0.35596	0.252274	AT1G10290.1;AT1G59610.1	816;823	0	0	299160	218330	0	0	261650	260400	1	90.1504	5.19702e-05	90.15	24.845	90.15	1	QLS(1)IHDNR	QLS(90)IHDNR	2	-0.63662
AT1G59610.1	719	S	20.5774	19.1704	19.1307	18.9563	17.9459	19.0816	18.6253	18.5645	-0.904375	1.36203	0.0192914	AT1G10290.1;AT1G59610.1	712;719	1341600	0	539110	464130	0	867160	430540	297080	0.995799	24.2211	9.41618e-11	103.21	69.469	78.692	1	QSLS(0.996)EGS(0.004)LDK	QS(-34)LS(24)EGS(-24)LDK	2	-0.065656
AT1G10450.1	698	S	18.6858	12.6639	13.9775	13.8921	18.2991	16.9777	16.3049	17.3771	2.43487	0.0293742	1.18442	AT1G10450.1;AT1G10450.2;AT1G10450.3	698;698;749	361570	0	0	0	821140	0	0	130440	0.980931	19.0645	3.86101e-29	145.17	125.07	145.17	1	HELEEGELS(0.981)PT(0.007)AS(0.012)R	HELEEGELS(19)PT(-22)AS(-19)R	2	0.11338
AT1G10900.3	224	S	20.3617	20.0788	19.9602	19.687	19.8883	19.8917	19.8401	19.6249	-0.210675	0.960879	0.05033	AT1G10900.3;AT1G10900.2;AT1G10900.1	224;224;224	1155300	2110900	958070	770200	2470700	1520400	999320	619530	0.995476	23.4255	8.17912e-08	91.961	71.755	91.961	1	S(0.005)AS(0.995)VNVEELR	S(-23)AS(23)VNVEELR	2	-0.063477
AT3G50500.1	153	S	14.4793	16.5846	12.6379	13.135	17.2607	17.3779	16.172	15.6546	2.4071	0.0107465	1.61187	AT1G60940.2;AT1G60940.1;AT1G10940.1;AT1G10940.2;AT3G50500.1;AT3G50500.2;AT2G23030.1;AT4G33950.2;AT4G33950.1;AT5G66880.2;AT5G66880.1	134;134;134;142;153;153;134;151;151;152;152	0	187330	0	0	399780	266220	0	39526	0.999994	52.5477	0.000179951	70.412	57.534	70.412	1	LENTLLDGS(1)PAPR	LENT(-53)LLDGS(53)PAPR	2	0.28125
AT1G11310.3	450	S	19.2941	18.9331	19.6442	18.9631	19.608	18.6978	18.4863	20.4256	0.0958	0.239282	0.373036	AT1G11310.3;AT1G11310.1	450;512	551200	954030	0	0	2034400	664620	390980	0	0.994285	22.7799	2.37064e-39	154.1	126.95	154.1	1	SVENYPSS(0.005)PS(0.994)PR	S(-130)VENY(-80)PS(-33)S(-23)PS(23)PR	2	0.75613
AT1G11360.4	23	S	22.9579	22.738	22.6346	22.3429	20.2459	21.7756	22.192	21.7955	-1.1661	1.69286	0.00889936	AT1G11360.4;AT1G11360.3;AT1G11360.2;AT1G11360.1	23;23;23;23	6985900	13334000	6115900	4853900	0	5611600	0	2789200	0.928814	11.1553	2.74708e-219	261.02	191.57	255.08	1	SPTVVTVQPS(0.929)S(0.071)PR	S(-150)PT(-120)VVT(-91)VQPS(11)S(-11)PR	2	0.10388
AT1G11360.4	24	S	13.891	12.7123	12.5822	13.1226	22.6	21.9443	22.0116	23.2714	9.3798	0	6.53675	AT1G11360.4;AT1G11360.3;AT1G11360.2;AT1G11360.1	24;24;24;24	0	0	0	0	16185000	0	4501800	0	0.950607	12.8434	1.31529e-194	258.62	199.05	217.16	1	SPTVVTVQPS(0.049)S(0.951)PR	S(-120)PT(-84)VVT(-63)VQPS(-13)S(13)PR	2	0.021485
AT1G11480.2	485	S	20.0784	18.5077	18.4467	19.3557	18.8451	17.6038	18.3781	18.7302	-0.707825	1.02426	0.0431432	AT1G11480.2;AT1G11480.1	485;498	0	710390	335570	0	1198900	0	362740	333230	0.998732	31.2204	0.000197486	59.426	49.638	59.426	1	T(0.001)RHPS(0.999)PET(0.001)WR	T(-33)RHPS(31)PET(-31)WR	3	-0.038637
AT1G11700.1	167	S	18.2355	16.7436	18.1678	17.6668	18.3924	12.7693	12.5531	13.3393	-3.4399	1.57928	0.0115953	AT1G11700.1	167	264640	0	0	189870	876030	0	0	0	0.999999	60.1308	3.83033e-14	117.93	102.39	117.93	1	S(1)GGGGSVFEGVGR	S(60)GGGGS(-60)VFEGVGR	2	-0.020562
AT1G11700.1	172	S	17.7839	17.0767	17.3214	16.7886	17.7481	13.1599	12.4982	14.5143	-2.76253	1.53216	0.0129445	AT1G11700.1	172	193500	263480	153820	103300	560490	0	0	0	0.911439	10.1249	0.00224812	43.991	38.149	43.991	1	S(0.089)GGGGS(0.911)VFEGVGR	S(-10)GGGGS(10)VFEGVGR	2	-0.66174
AT1G12000.1	16	S	20.1364	19.4403	19.2245	19.3175	19.4675	19.1505	18.9083	21.9888	0.3491	0.172204	0.485001	AT1G12000.1	16	988240	1356000	575350	596180	1845600	909560	523850	0	1	70.2627	5.44713e-50	158.81	114.2	158.81	1	DLTAVGS(1)PENAPAK	DLT(-70)AVGS(70)PENAPAK	2	-0.26424
AT1G12360.1	588	S	17.4193	17.1343	16.9096	16.7322	17.6155	16.961	17.1202	16.8953	0.09915	0.176665	0.475975	AT1G12360.1	588	150290	274200	115630	99336	511250	199410	151680	93405	0.869706	8.88836	0.000310591	62.14	48.461	62.14	1	GS(0.001)DDGY(0.001)S(0.112)S(0.87)DS(0.015)VLR	GS(-28)DDGY(-29)S(-8.9)S(8.9)DS(-18)VLR	2	0.34226
AT1G12760.2	124	S	20.4736	20.8621	21.6276	20.2306	19.5565	20.5618	19.9774	21.2067	-0.472875	0.751627	0.0846862	AT1G12760.2;AT1G12760.1	124;195	1248500	3632800	0	1122600	0	2419200	1099100	0	0.999824	37.5557	2.23547e-06	84.948	76.239	84.948	1	RNS(1)GVQDLSLGHLDTESSSVAK	RNS(38)GVQDLS(-38)LGHLDT(-74)ES(-78)S(-78)S(-78)VAK	3	0.0073455
AT1G13020.1	508	S	20.3561	19.6547	20.7122	20.7115	18.4287	18.1754	18.4669	18.3494	-2.00352	3.92618	5.16841e-05	AT1G13020.1	508	1150800	1573200	0	0	898330	462710	385760	0	0.992682	21.3241	0.00114697	48.053	36.783	48.053	1	S(0.993)HGT(0.007)GDNWPRPVDDR	S(21)HGT(-21)GDNWPRPVDDR	3	0.56892
AT1G13030.1	321	S	14.9375	13.5508	12.8404	17.6636	14.8594	17.8474	18.3248	16.0805	2.02995	0.0406108	1.04929	AT1G13030.1	321	0	0	0	189450	75680	368600	0	0	0.998878	29.4947	8.3358e-05	44.743	39.531	44.743	1	HCET(0.001)LENQQAEEVS(0.999)DGFGDEVVPVEVRPGHIR	HCET(-29)LENQQAEEVS(29)DGFGDEVVPVEVRPGHIR	4	-0.045227
AT1G13030.1	187	S	20.0598	20.4167	20.5668	20.0577	20.5884	20.6031	20.1369	20.7546	0.2455	0.0539046	0.932832	AT1G13030.1	187	937170	2667900	1458800	995850	4014000	2489600	1227600	0	0.995273	26.3499	9.90214e-07	87.952	77.083	87.952	1	LDTT(0.002)EES(0.995)PDERENT(0.002)AVVSNVVK	LDT(-35)T(-26)EES(26)PDERENT(-27)AVVS(-44)NVVK	3	1.0732
AT1G13210.1	29	S	18.9705	17.9218	19.0421	18.4653	11.8039	12.4826	18.8724	14.0238	-4.30425	1.72901	0.00818183	AT1G13210.1	29	440450	0	507000	330240	0	0	510970	0	0.992406	21.5697	0.000819979	45.369	40.314	45.369	1	S(0.007)NFQEDHS(0.992)HIGGPGFS(0.001)R	S(-22)NFQEDHS(22)HIGGPGFS(-32)R	3	-0.45521
AT1G13360.3	31	S	15.7546	15.4968	17.2775	16.8532	17.8796	18.0145	18.1308	18.137	1.69495	0.00169096	2.41046	AT1G13360.3;AT1G13360.2;AT1G13360.1	31;31;31	47403	0	149210	108030	613970	413870	305600	220890	1	76.9753	2.07176e-07	101.36	79.894	101.36	1	DESFDEAVLDS(1)PEVK	DES(-77)FDEAVLDS(77)PEVK	2	-1.4986
AT1G13440.1	236	S	22.3278	21.4446	21.3773	21.4107	21.2121	21.0548	21.3756	21.677	-0.310225	0.843514	0.0672113	AT1G13440.1;AT1G13440.2;AT3G04120.1	236;208;236	4513800	5440100	2558400	2543700	6184800	3404700	2896900	2569400	1	63.6666	9.03559e-06	101.46	50.267	82.645	1	LTGMS(1)FR	LT(-64)GMS(64)FR	2	-0.31026
AT1G14280.1	239	S	17.4462	19.4064	17.551	18.2367	19.5079	19.4735	19.2637	18.9966	1.15035	0.0106748	1.61476	AT1G14280.1	239	153120	1324500	180360	281850	1898000	1137800	670190	400820	1	70.6057	4.21204e-05	78.324	63.122	74.76	1	S(1)LEIFGSPLIEK	S(71)LEIFGS(-71)PLIEK	2	-0.19309
AT1G14280.1	245	S	17.9505	18.8617	16.9715	18.0034	20.8264	20.5478	19.9007	19.7694	2.3143	0.000529728	2.91397	AT1G14280.1	245	0	907970	120700	239770	4733900	2395900	1042200	684800	1	91.6263	2.22133e-10	111.39	96.186	111.39	1	SLEIFGS(1)PLIEK	S(-92)LEIFGS(92)PLIEK	2	-0.12196
AT1G14580.1	72	S	18.7617	18.9567	19.1216	18.9018	19.0511	18.9941	19.0386	18.8107	0.038175	0.185595	0.458715	AT1G14580.1;AT1G14580.2;AT1G14580.3	72;72;86	381090	969800	535710	446910	1382900	816120	573350	352340	1	109.381	1.47352e-11	109.38	95.718	109.38	1	NQPGNPNPDAEVIALS(1)PK	NQPGNPNPDAEVIALS(110)PK	2	0.30257
AT1G14650.3	259	S	18.2524	16.3937	17.0965	16.7366	11.9537	10.902	12.749	15.2592	-4.40383	2.61783	0.00104835	AT1G14650.3;AT1G14650.2;AT1G14650.1	259;259;259	267750	164110	131620	99642	0	0	0	0	0.99994	43.5527	0.00144217	48.004	32.802	48.004	1	S(1)AADLTTVLER	S(44)AADLT(-44)T(-48)VLER	2	0.17896
AT1G15280.1	10	S	18.504	18.391	19.2558	18.9407	18.6988	18.8471	18.9837	19.1243	0.1406	0.138452	0.563872	AT1G15280.1;AT1G15280.2	10;10	318770	655230	587940	459140	1083300	737060	551950	437890	0.999871	38.9496	3.09347e-14	114.69	101.68	101.36	1	ATSEAEYES(1)DPEELNR	AT(-61)S(-59)EAEY(-39)ES(39)DPEELNR	2	-1.0254
AT1G15340.2	331	S	18.6446	19.1385	19.2297	18.9145	17.3492	17.7773	18.0361	17.8024	-1.24057	3.46735	0.00014812	AT1G15340.2;AT1G15340.1	331;383	351390	1100000	577390	450870	425090	351120	286190	175170	0.998465	28.1332	7.23995e-05	71.08	64.644	71.08	1	SLEANQVQQQQGAAAS(0.002)VS(0.998)C	S(-71)LEANQVQQQQGAAAS(-28)VS(28)C	2	0.53841
AT1G15400.2	16	S	17.9296	18.2779	17.6474	17.6064	18.5002	18.4631	17.6644	20.2625	0.857225	0.0417253	1.03808	AT1G15400.2;AT1G15400.1;AT1G15400.3	16;16;16	0	605820	192820	182090	943960	564830	221180	0	0.983717	17.8115	7.43398e-39	151.54	93.706	63.727	1	RQGS(0.984)S(0.016)GIVFDDR	RQGS(18)S(-18)GIVFDDR	2	-0.41359
AT1G15400.2	100	S	18.3591	18.1561	18.2729	18.345	16.757	18.0006	17.4117	18.3708	-0.64825	1.22716	0.026535	AT1G15400.2;AT1G15400.1;AT1G15400.3	100;100;100	0	556770	297480	303820	0	409900	0	259750	1	41.0916	0.000252407	73.464	44.488	41.092	2	VS(1)PAVDPPS(1)PR	VS(41)PAVDPPS(41)PR	2	0.74243
AT1G15400.2	107	S	19.8488	19.7876	18.2729	19.6822	19.8942	19.9829	19.4364	18.3708	0.0232	0.286664	0.315887	AT1G15400.2;AT1G15400.1;AT1G15400.3	107;107;107	809660	1725000	297480	767620	2480900	1619600	755390	259750	1	41.0916	5.2845e-22	125.53	104.9	41.092	1;2	VS(1)PAVDPPS(1)PR	VS(41)PAVDPPS(41)PR	2	0.74243
AT1G15750.4	214	S	20.8248	22.8791	22.5166	21.9026	22.3305	22.6954	22.6031	22.1682	0.418525	0.0978698	0.695152	AT1G15750.4;AT1G15750.3;AT1G15750.2;AT1G15750.1	214;214;214;214	1592600	14704000	5635400	3577400	13428000	10616000	6783300	3611500	1	154.812	7.16527e-109	211.09	177.86	154.81	1	APS(1)PVNNPLLGGIPK	APS(150)PVNNPLLGGIPK	2	-0.13595
AT1G15750.4	705	S	20.4737	19.6408	20.3746	20.192	18.5026	13.4964	14.8935	12.675	-5.2784	2.47666	0.00145166	AT1G15750.4;AT1G15750.3;AT1G15750.2;AT1G15750.1	705;705;705;705	0	1558100	1276800	1093000	945540	0	0	0	0.929505	11.2009	3.66385e-34	142.2	142.2	115.34	1	PAINSIAAAAAAAAT(0.07)S(0.93)AGHADR	PAINS(-93)IAAAAAAAAT(-11)S(11)AGHADR	3	0.28911
AT1G15940.1	290	S	18.4079	18.5905	18.6543	20.6428	17.9972	17.7297	17.5932	17.517	-1.3646	1.66003	0.00960608	AT1G15940.1	290	0	752400	387510	0	666120	339740	210530	143720	0.956976	13.4732	0.000825521	48.823	31.797	48.823	1	ISEGQVVPS(0.043)DS(0.957)LEDK	IS(-49)EGQVVPS(-13)DS(13)LEDK	2	1.0382
AT1G15940.1	768	S	19.9665	18.4012	19.7464	19.5376	19.0826	19.3783	19.0138	19.197	-0.245	0.586161	0.130371	AT1G15940.1	768	0	0	826060	694430	0	1065200	563570	460530	0.999986	48.5433	9.94042e-06	50.908	42.909	50.908	1	LGKES(1)DAEPDRMEDHQELPENHNVETK	LGKES(49)DAEPDRMEDHQELPENHNVET(-49)K	4	-1.0478
AT5G55910.2	345	S	17.9585	19.3952	18.6714	19.3849	19.1321	19.295	17.328	19.0123	-0.16065	0.404298	0.217661	AT5G55910.2;AT5G55910.1;AT1G16440.1;AT4G26610.1;AT3G27580.2;AT3G27580.1;AT5G47750.1;AT2G44830.3;AT2G44830.2;AT2G44830.1	345;345;335;355;415;415;426;596;596;596	218400	1314200	0	624660	1462800	1005400	0	405180	0.979805	16.874	1.53676e-14	123.36	106.14	110.38	1	S(0.02)MS(0.98)FVGTHEYLAPEIIK	S(-17)MS(17)FVGT(-41)HEY(-75)LAPEIIK	2	-0.16889
AT1G16520.1	191	S	19.2619	19.082	19.2902	19.1375	18.4987	18.9857	19.0668	18.8052	-0.3538	1.69964	0.00876019	AT1G16520.1	191	539030	1057800	602140	526240	942980	811410	584660	351010	0.985285	19.7236	0.00923795	52.247	39.62	52.247	1	FSMT(0.002)S(0.011)Y(0.002)IS(0.985)PR	FS(-43)MT(-27)S(-20)Y(-27)IS(20)PR	2	-0.79188
AT1G16610.4	77	S	17.4172	16.0274	17.0888	17.3397	16.9804	13.9438	15.4677	17.6542	-0.95675	0.792713	0.0763266	AT1G16610.4;AT1G16610.5;AT1G16610.7;AT1G16610.6;AT1G16610.2;AT1G16610.1;AT1G16610.3	77;77;77;77;77;77;77	150070	127310	0	0	329190	24630	48246	0	1	83.748	1.58219e-07	99.669	74.601	99.669	1	GRS(1)PPPPPSK	GRS(84)PPPPPS(-84)K	2	-0.1237
AT1G16610.4	183	S	21.0514	20.7438	20.4865	20.202	21.1787	20.4714	22.4489	20.1568	0.443025	0.108839	0.654283	AT1G16610.4;AT1G16610.5;AT1G16610.7;AT1G16610.6;AT1G16610.2;AT1G16610.1;AT1G16610.3	183;183;183;183;183;183;183	1863400	3346900	1379800	1100600	6043200	2272300	0	895760	0.994834	22.851	4.81848e-13	113.54	82.976	113.54	1	VS(0.005)S(0.995)PPKPVSAAPK	VS(-23)S(23)PPKPVS(-52)AAPK	2	-0.030678
AT1G16610.4	282	S	18.9641	17.68	17.5563	17.1649	18.5352	16.5812	17.2294	17.3393	-0.42005	0.615754	0.120468	AT1G16610.4;AT1G16610.5;AT1G16610.7;AT1G16610.6;AT1G16610.2;AT1G16610.1;AT1G16610.3	282;282;289;289;282;289;289	438510	400260	181020	134080	967150	153250	163610	127070	0.998888	29.5337	9.60508e-05	77.593	59.784	69.451	2	Y(0.001)RS(0.999)PPRGS(1)PR	Y(-30)RS(30)PPRGS(37)PR	2	-0.38555
AT1G16610.4	287	S	18.9641	17.68	17.5563	17.1649	18.5352	16.5812	17.2294	17.3393	-0.42005	0.615754	0.120468	AT1G16610.4;AT1G16610.5;AT1G16610.7;AT1G16610.6;AT1G16610.2;AT1G16610.1;AT1G16610.3	287;287;294;294;287;294;294	438510	400260	181020	134080	967150	153250	163610	127070	0.999967	44.7808	9.60508e-05	77.593	59.784	77.593	2	Y(0.002)RS(0.998)PPRGS(1)PR	Y(-27)RS(27)PPRGS(45)PR	2	-0.24683
AT1G16860.1	169	S	20.5975	20.6901	20.2597	19.7634	20.2839	20.5337	19.5217	20.5228	-0.11215	0.434217	0.199245	AT1G16860.1	169	1360400	3224500	1179100	812070	3250100	2372600	801380	0	1	74.9042	2.61374e-28	137.19	116.86	137.19	1	KVS(1)GPLDSSGLMK	KVS(75)GPLDS(-75)S(-88)GLMK	2	-0.38942
AT1G16860.1	105	S	18.4838	18.4655	18.8526	19.1643	18.1955	13.7711	12.7132	13.7291	-4.13932	2.11566	0.00334038	AT1G16860.1	105	314340	689930	0	0	764240	0	0	0	0.959326	13.7716	1.26631e-05	87.18	73.5	83.692	1	MSGSLASAGS(0.04)VS(0.959)MK	MS(-77)GS(-57)LAS(-34)AGS(-14)VS(14)MK	2	-0.65254
AT1G16860.1	64	S	18.1363	17.589	17.2662	18.2392	15.7864	16.489	17.1036	17.258	-1.14842	1.82207	0.00659199	AT1G16860.1	64	0	375790	148050	282340	0	0	149940	120110	0.999829	37.6722	0.00451271	40.352	31.669	40.352	1	S(1)GPIPGAPSR	S(38)GPIPGAPS(-38)R	2	0.49003
AT1G16970.1	553	S	16.9075	16.7502	17.2435	18.2784	16.2454	16.3121	15.4566	18.1729	-0.74815	0.81362	0.0724223	AT1G16970.1	553	105410	210110	0	0	197790	127170	47877	0	0.873477	8.39445	9.01804e-05	68.257	62.153	68.257	1	QSIYGDDPDEES(0.873)DS(0.126)GAK	QS(-51)IY(-39)GDDPDEES(8.4)DS(-8.4)GAK	2	-0.31699
AT1G17210.1	505	S	21.0055	13.977	15.1577	12.1388	20.7705	21.1482	20.9865	21.0207	5.41173	0.0066158	1.82051	AT1G17210.1	505	1805100	0	0	0	4554000	3632500	2212000	1630200	0.99997	45.2954	2.80202e-10	95.878	79.081	95.878	1	ADS(1)VEGTVVDRDGDEVNDDSAGPSK	ADS(45)VEGT(-45)VVDRDGDEVNDDS(-89)AGPS(-94)K	3	-2.2069
AT1G17210.1	322	S	19.0831	19.5899	19.5236	19.2497	18.729	18.846	18.716	18.5771	-0.64455	2.88243	0.000569734	AT1G17210.1	322	476190	1504100	707850	568780	1106200	736530	458460	299670	0.99971	35.3752	2.63903e-05	86.467	63.747	86.467	1	AS(1)GNYEVLGPEYK	AS(35)GNY(-35)EVLGPEY(-80)K	2	-0.67989
AT1G17210.1	554	S	19.7117	19.9818	20.1643	20.0485	18.9641	18.9624	20.1106	20.2214	-0.41195	0.827967	0.0698689	AT1G17210.1	554	736260	1973600	1103600	989530	1302000	798400	0	0	0.983694	17.8431	3.77685e-07	93.51	51.97	75.018	1	DLSVGGPS(0.016)HS(0.984)LDAENER	DLS(-38)VGGPS(-18)HS(18)LDAENER	2	0.56922
AT1G17370.1	241	S	22.0751	21.5727	21.9775	21.6415	12.2521	13.3703	20.865	13.6507	-6.78218	2.16192	0.00300177	AT1G17370.1	241	0	5945000	3878300	2985000	0	0	2033400	0	0.99287	21.5002	9.00513e-148	230.26	205.43	225.85	1	SVVELTS(0.007)GVS(0.993)EDGK	S(-100)VVELT(-40)S(-22)GVS(22)EDGK	2	0.10359
AT1G17745.1	71	S	20.5348	18.882	18.5086	19.0705	14.6034	19.5856	13.1478	12.7288	-4.23258	1.68379	0.00908912	AT1G17745.1;AT1G17745.2	71;71	0	920850	0	502370	0	1229800	0	0	0.838204	10.5036	2.02133e-07	97.579	90.85	54.7	1	FS(0.075)T(0.075)VGS(0.838)DS(0.009)DEY(0.003)NPTLPK	FS(-11)T(-11)VGS(11)DS(-20)DEY(-24)NPT(-37)LPK	2	0.35271
AT1G17840.1	688	S	19.273	19.4903	18.9722	18.1631	19.1948	19.2037	18.2738	18.2064	-0.254975	0.561431	0.139373	AT1G17840.1	688	543210	1403800	483010	267820	1527800	943770	337440	231780	0.963739	14.9864	4.56797e-24	128.38	107.72	99.021	1	NGTQNTTVAPDGLT(0.006)QS(0.031)PS(0.964)LR	NGT(-67)QNT(-49)T(-49)VAPDGLT(-22)QS(-15)PS(15)LR	2	-0.20973
AT1G17840.1	27	S	18.986	17.6211	17.843	16.4435	21.0176	20.606	20.8357	20.2634	2.95727	0.000355398	3.08745	AT1G17840.1	27	445220	0	0	81319	5404600	2494500	1992500	964460	0.96607	16.4529	4.43226e-08	63.848	51.293	63.848	1	QQT(0.009)T(0.003)VPVSVGGGNFPVGGLS(0.966)PLS(0.022)EAIWR	QQT(-20)T(-25)VPVS(-38)VGGGNFPVGGLS(16)PLS(-16)EAIWR	3	0.70395
AT1G18150.3	539	S	17.2313	17.7026	17.9776	17.6096	17.1813	17.0607	17.0889	17.4372	-0.43825	1.62378	0.0104523	AT1G18150.3;AT1G18150.2;AT1G18150.1	539;539;539	131930	406570	0	182490	378390	213670	148420	135990	0.999301	31.7257	1.83116e-07	85.927	73.567	78.088	1	AAAAVASTLES(0.001)EEADNGGGYS(0.999)AR	AAAAVAS(-52)T(-52)LES(-32)EEADNGGGY(-48)S(32)AR	2	0.62298
AT1G18160.2	462	S	17.2236	15.9319	16.4907	16.6195	16.9787	17.1285	18.3182	18.7475	1.2268	0.0117261	1.57448	AT1G18160.2;AT1G18160.1	462;462	131230	0	86491	0	328800	223950	0	0	0.868619	10.9808	0.00143689	45.359	38.153	45.359	1	S(0.062)PS(0.869)WT(0.069)EGVSSPAGR	S(-11)PS(11)WT(-11)EGVS(-39)S(-39)PAGR	2	0.28068
AT1G18210.2	54	S	18.5194	18.1291	18.489	18.1111	17.7553	18.1143	17.7603	18.1016	-0.379275	1.64781	0.00988323	AT1G18210.2;AT1G18210.1	54;54	0	546440	345550	258350	563280	443520	0	215530	0.876957	9.16537	0.000695248	74.46	63.631	72.089	1	AMGT(0.106)S(0.877)Y(0.002)T(0.014)ET(0.001)ELNR	AMGT(-9.2)S(9.2)Y(-25)T(-18)ET(-31)ELNR	2	0.87677
AT1G18740.1	205	S	20.2102	19.9279	20.0458	20.1395	20.0424	19.8003	20.0693	20.2351	-0.044075	0.456769	0.186637	AT1G18740.1;AT1G74450.1;AT1G43630.1	205;213;227	1040100	1901200	1016600	1053900	2749200	1427100	1171400	945690	0.998136	28.0672	0.000325831	82.749	35.552	71.349	1	SLS(0.998)WS(0.002)VSR	S(-36)LS(28)WS(-28)VS(-43)R	2	-0.12684
AT1G18840.3	75	S	17.4683	18.6726	17.1681	18.1778	12.9528	12.629	13.8381	18.0142	-3.51318	1.76239	0.00757153	AT1G18840.3;AT1G18840.2;AT1G18840.1	75;75;75	155490	796450	0	270580	0	0	0	202860	0.994678	24.3262	1.74364e-05	51.28	39.637	44.898	1	HEDVS(0.995)DDEIQVS(0.004)EVQPT(0.001)DS(0.001)QDVASVPDDSLSESEK	HEDVS(24)DDEIQVS(-24)EVQPT(-32)DS(-32)QDVAS(-37)VPDDS(-41)LS(-43)ES(-45)EK	3	0.24912
AT1G19000.2	39	S	17.1543	15.9826	17.0759	17.1388	15.0485	18.1288	18.0662	17.5628	0.363675	0.173474	0.482403	AT1G19000.2;AT1G19000.1	39;39	125070	0	0	131680	0	448010	0	148360	0.999343	31.9455	0.000728488	54.143	41.163	54.143	1	CVS(0.999)LNNLS(0.001)DYEK	CVS(32)LNNLS(-32)DY(-47)EK	2	-0.93437
AT1G19350.6	171	S	18.5475	18.1137	18.6127	18.4422	17.865	17.399	18.0523	17.8733	-0.631625	2.21542	0.0026525	AT1G19350.6;AT1G19350.5;AT1G19350.4;AT1G19350.1;AT1G19350.3	171;171;171;171;193	328530	540630	376490	324990	607790	0	289410	183990	0.836315	7.43962	0.000133387	71.558	64.15	40.844	2	IS(0.155)NS(0.836)APVT(0.18)PPVS(0.368)S(0.329)PT(0.069)S(0.062)R	IS(-7.4)NS(7.4)APVT(-3.3)PPVS(0.49)S(-0.49)PT(-7.4)S(-7.9)R	2	-0.51258
AT1G19450.1	2	S	18.084	16.8902	17.8317	18.0214	18.718	17.605	17.2157	17.374	0.02135	0.285139	0.317525	AT1G19450.1	2	0	0	219100	242770	1097800	311610	162060	130160	0.999653	34.5918	4.06644e-05	73.466	56.926	73.466	1	S(1)FRDDNTEEGR	S(35)FRDDNT(-35)EEGR	2	0.51402
AT1G19870.1	180	S	18.15	12.8566	14.6948	14.601	19.0286	19.119	18.6572	19.2024	3.9262	0.0027233	2.20408	AT1G19870.1	180	249400	0	0	0	1361500	889940	440150	0	0.971373	15.5358	0.000338609	83.499	63.49	83.499	1	IEEDVT(0.027)S(0.971)EVEMAS(0.001)K	IEEDVT(-16)S(16)EVEMAS(-28)K	2	-0.61028
AT1G19870.1	369	S	17.5449	16.6548	17.5252	17.7373	18.5595	18.4984	18.2248	18.5695	1.0975	0.00110059	2.59672	AT1G19870.1;AT1G19870.2	369;186	163960	0	177170	199380	983610	578830	326170	298110	0.999999	62.4214	1.24065e-05	79.633	66.205	79.633	1	IS(1)PQADFVNSDSTVENK	IS(62)PQADFVNS(-62)DS(-67)T(-72)VENK	2	-0.46692
AT1G19870.1	459	S	21.6107	21.1948	20.833	20.7168	21.1142	20.4868	20.392	20.4872	-0.468775	1.21145	0.0275444	AT1G19870.1;AT1G19870.2	459;276	2745800	4575200	1754400	1572500	5778900	2296800	1465000	1126300	1	84.7557	3.08514e-148	234.36	197.04	234.36	1	KVS(1)NPSFIAAQSK	KVS(85)NPS(-85)FIAAQS(-190)K	2	0.72036
AT1G19870.1	706	S	20.0201	20.3514	19.6319	19.6954	18.5203	19.8426	19.6805	19.5673	-0.522025	1.05044	0.0404983	AT1G19870.1;AT1G19870.2	706;523	911720	2549800	763070	774700	0	1469600	894660	595290	0.969096	15.1303	0.000168219	68.44	48.654	58.674	1	RT(0.03)S(0.969)FGY(0.001)DQEAR	RT(-15)S(15)FGY(-29)DQEAR	2	-1.3172
AT1G19870.1	502	S	17.7505	16.4052	17.4098	17.5588	18.2443	17.7048	17.2227	17.7709	0.4546	0.0605471	0.885613	AT1G19870.1;AT1G19870.2	502;319	0	0	163550	176180	790540	333930	162850	171380	0.99782	27.2814	2.26687e-05	87.18	69.514	87.18	1	TDIDS(0.998)PDT(0.002)TNTIK	T(-46)DIDS(27)PDT(-27)T(-36)NT(-44)IK	2	0.61181
AT1G19870.1	142	S	16.5224	18.2627	17.9281	17.7983	18.5891	15.9121	17.7081	17.758	-0.13605	0.372509	0.23967	AT1G19870.1	142	0	599470	234240	207990	1004000	0	227990	169860	0.999396	32.2132	2.18345e-05	77.593	65.746	76.522	1	T(0.001)EVS(0.999)PVIVESK	T(-32)EVS(32)PVIVES(-54)K	2	0.7503
AT1G19870.1	193	S	20.4799	20.7024	20.9057	20.7291	20.8947	21.1861	21.0636	20.9336	0.315225	0.00616934	1.85062	AT1G19870.1;AT1G19870.2	193;10	1253900	3252300	1845000	1586000	4963500	3729200	2333500	1534700	0.99629	24.2901	5.75026e-77	187.97	155.35	156.6	1	VEPEES(0.996)ES(0.004)DDVIIVR	VEPEES(24)ES(-24)DDVIIVR	2	0.35601
AT1G20110.1	530	S	18.5452	17.1022	18.3632	18.1653	18.1167	17.9066	17.7089	18.0151	-0.10715	0.420271	0.207575	AT1G20110.1	530	0	0	316690	268240	723640	384060	228110	202990	0.999873	38.9674	0.00014114	68.44	57.917	68.44	1	NVS(1)LQSHEDLAR	NVS(39)LQS(-39)HEDLAR	2	0.31101
AT1G20110.1	279	S	20.5597	19.6108	19.9502	19.7886	19.8371	19.6056	19.5682	20.8728	-0.0064	0.30681	0.295326	AT1G20110.1	279	1325200	1526100	0	826390	2384600	1246900	827680	0	0.999872	39.0498	4.86357e-14	121.5	110.63	121.5	1	SIS(1)FSSSGR	S(-39)IS(39)FS(-55)S(-61)S(-74)GR	2	0.0053881
AT1G20110.1	218	S	21.6075	21.2038	20.7686	20.6331	21.1121	20.5776	20.5239	20.37	-0.40735	1.02792	0.042763	AT1G20110.1	218	2739700	4603900	1677800	1483900	5770700	2446000	1605200	1038400	0.998657	28.7294	2.2039e-28	141.55	114.45	138.28	1	S(0.001)RS(0.999)DLGSDLYGK	S(-29)RS(29)DLGS(-53)DLY(-93)GK	2	0.22359
AT1G20220.1	147	S	21.5737	21.3371	21.5405	21.4273	21.573	21.3197	21.2825	21.3763	-0.081775	0.733354	0.088723	AT1G20220.1	147	2676400	5049300	2864900	2573300	7942500	4091000	2715800	2085900	1	163.365	0	328.56	308.72	266.71	1	PLAEIDYEGQDGS(1)PR	PLAEIDY(-160)EGQDGS(160)PR	2	-0.63019
AT1G20440.1	64	S	19.5847	19.6514	20.3249	20.2286	19.8541	20.0395	20.4005	20.1887	0.1733	0.11585	0.630526	AT1G20440.1	64	674190	1569600	1233600	1121100	2412800	1684400	1473700	915780	1	60.4741	1.65063e-14	120.66	109.02	60.474	1	AQIS(1)EPELAAEHEEVK	AQIS(60)EPELAAEHEEVK	2	0.75809
AT1G20440.1	22	S	17.9903	17.3493	17.9836	18.3181	18.9065	19.4088	18.646	19.5502	1.21755	0.00130223	2.52371	AT1G20440.1	22	223270	0	0	298200	1251000	1087900	436760	0	0.988804	25.2976	2.17556e-07	72.292	62.444	68.104	1	NNVPEHET(0.002)PT(0.003)VAT(0.003)EES(0.989)PAT(0.002)TTEVTDR	NNVPEHET(-27)PT(-25)VAT(-25)EES(25)PAT(-26)T(-33)T(-33)EVT(-41)DR	3	0.46833
AT1G20670.1	164	S	17.2648	17.3374	18.4727	17.8462	17.6911	17.4855	17.59	17.0914	-0.265775	0.675606	0.102953	AT1G20670.1	164	135030	315660	341660	215010	538770	286830	210060	107010	0.997701	26.5507	2.26069e-13	108.56	79.601	108.56	1	ATDILQGS(0.998)PVES(0.002)GPTTPLPDK	AT(-61)DILQGS(27)PVES(-27)GPT(-43)T(-43)PLPDK	2	0.39219
AT1G20670.1	279	S	18.3156	18.766	18.7157	18.6639	18.4304	18.7051	19.764	20.6838	0.780525	0.0430689	1.02498	AT1G20670.1	279	279730	849710	404340	378970	899420	668000	0	0	0.99931	31.6115	8.39307e-06	63.085	54.539	63.085	1	DFENLRQDS(0.999)DDEEPQS(0.001)QQQQQQQPK	DFENLRQDS(32)DDEEPQS(-32)QQQQQQQPK	3	0.1209
AT1G20760.1	741	S	19.7644	20.2005	20.3216	19.9139	20.1691	20.3468	20.1306	19.9521	0.09955	0.135306	0.572366	AT1G20760.1	741	0	2296700	1230800	901340	3001500	2084300	1222200	777290	0.95874	14.0801	4.84943e-45	142.56	130.82	116.94	1	ENGTVDDGS(0.004)GPPDS(0.959)PT(0.037)HVEDNYGPFSETSDR	ENGT(-45)VDDGS(-24)GPPDS(14)PT(-14)HVEDNY(-43)GPFS(-62)ET(-73)S(-72)DR	3	-0.67839
AT1G20760.1	900	S	18.2173	18.4186	18.7875	18.3735	19.0745	19.2229	19.265	19.0885	0.7135	0.000330624	3.11886	AT1G20760.1	900	261320	667850	424980	309890	1405500	956370	670770	427160	0.999907	40.8147	1.53808e-22	128.9	113.14	128.9	1	FDS(1)FNTSEAGAGFSSQPER	FDS(41)FNT(-41)S(-50)EAGAGFS(-110)S(-110)QPER	2	-1.0464
AT1G20760.1	939	S	18.2856	16.3998	17.8815	17.7572	14.2982	15.7569	15.6981	16.1359	-2.10875	2.28126	0.00227863	AT1G20760.1	939	273990	164800	0	0	0	86547	56603	55178	0.999909	41.3687	3.22794e-06	100.58	64.16	99.973	1	FDS(1)INSSR	FDS(41)INS(-41)S(-47)R	2	-0.26452
AT1G20760.1	878	S	18.4714	16.3086	17.8389	18.1518	17.0831	14.2752	14.6202	14.9356	-2.46415	1.97913	0.00458069	AT1G20760.1	878	311640	154710	0	0	353480	0	0	0	1	105.521	7.74472e-09	105.52	78.267	105.52	1	FGNS(1)PPR	FGNS(110)PPR	2	0.24079
AT1G20760.1	788	S	19.2749	18.8877	18.447	18.513	19.2439	18.4169	18.5256	18.6284	-0.07695	0.407699	0.215463	AT1G20760.1	788	543900	924470	335640	341350	1580700	547010	401790	310520	0.9991	30.5813	1.10834e-38	153.39	146.37	135.58	1	NATEVPS(0.999)PDYS(0.001)QGK	NAT(-65)EVPS(31)PDY(-46)S(-31)QGK	2	0.19833
AT1G20760.1	826	S	17.3606	17.2418	17.6048	17.1955	17.3996	17.6467	17.2777	17.1249	0.01155	0.275114	0.328591	AT1G20760.1	826	144300	295410	187220	136960	440190	320730	169180	109520	0.999888	39.592	3.66772e-06	84.829	70.671	65.716	1	S(1)QDGDYFGSGDDFGGNTAR	S(40)QDGDY(-40)FGS(-59)GDDFGGNT(-66)AR	2	-0.31431
AT1G20920.7	324	S	17.1663	18.0028	17.658	17.2047	17.5519	17.3501	17.2218	16.8968	-0.2528	0.774164	0.0799832	AT1G20920.7;AT1G20920.6;AT1G20920.5;AT1G20920.4;AT1G20920.3;AT1G20920.1	324;324;324;324;324;324	126120	500620	194250	137830	489210	261130	162750	93505	0.999645	34.4944	1.52032e-05	78.285	65.305	78.285	1	AWTLEGES(1)DDEEGHPEEK	AWT(-34)LEGES(34)DDEEGHPEEK	2	-0.27718
AT1G20970.1	199	S	19.6729	19.0998	20.0871	19.4024	18.9632	14.4854	12.8957	13.7588	-4.53978	2.09569	0.00349796	AT1G20970.1	199	0	1070900	0	632280	1301200	0	0	0	0.961104	16.5217	2.24678e-10	92.238	84.962	92.238	1	NNVEEPEVEIES(0.961)DS(0.017)ET(0.021)DVEGHQGDK	NNVEEPEVEIES(17)DS(-17)ET(-17)DVEGHQGDK	3	-0.71409
AT1G21170.1	179	S	18.6256	20.5135	20.1844	20.443	20.4537	21.8149	20.7669	20.385	0.9135	0.0338888	1.12456	AT1G21170.1;AT1G21170.2	179;179	346790	2853000	1119100	1300700	3656100	5766300	1899700	1049300	0.999975	46.1117	1.66767e-22	132.76	97.992	128.28	1	VVLTSLQS(1)FPR	VVLT(-63)S(-46)LQS(46)FPR	2	0.32927
AT1G21380.1	294	S	19.9219	20.6839	18.4649	20.3175	22.5007	21.5885	21.7133	24.1532	2.64187	0.00295542	2.16864	AT1G21380.1	294	0	3210700	339820	1192300	15109000	4928900	3660900	0	0.987322	18.9323	3.37289e-16	87.96	81.094	82.684	1	GNSVPATAPTPIPLVS(0.013)INHDDDDDES(0.987)DDDFLQLAHR	GNS(-56)VPAT(-51)APT(-44)PIPLVS(-19)INHDDDDDES(19)DDDFLQLAHR	4	-0.39085
AT1G21380.1	383	S	22.5828	21.9209	21.6304	21.6416	21.8176	21.2027	21.1165	21.308	-0.582725	1.416	0.0169924	AT1G21380.1	383	5386500	7568200	3049000	2985400	9410200	3772400	2420700	1989400	1	128.216	1.48865e-38	155	116.92	155	1	S(1)PEHALFTK	S(130)PEHALFT(-130)K	2	0.38841
AT1G21630.3	1083	S	18.2556	19.3683	19.6546	18.8579	19.7615	19.8661	19.3894	19.586	0.61665	0.0237138	1.27459	AT1G21630.3;AT1G21630.1;AT1G21630.4;AT1G21630.2	1083;1105;1112;1134	268350	1290000	775150	433530	2262900	1493700	731170	603060	1	69.9513	4.70035e-50	159.22	135.37	142.91	1	FDS(1)FNSNNNDAFSLSR	FDS(70)FNS(-70)NNNDAFS(-130)LS(-140)R	2	-0.46494
AT1G21630.3	1115	S	20.1936	19.3161	18.9951	19.0819	20.1896	19.7601	21.542	21.2989	1.30098	0.00949332	1.6651	AT1G21630.3;AT1G21630.1;AT1G21630.4;AT1G21630.2	1115;1137;1144;1166	1028200	1244100	490760	506330	3044600	1387900	0	0	1	75.672	1.33114e-13	120.12	115.76	120.12	1	FDS(1)FNYQR	FDS(76)FNY(-76)QR	2	0.096674
AT1G21630.3	1150	S	20.3129	18.3748	18.5118	18.5856	19.9039	10.395	12.7191	12.398	-5.09228	1.56831	0.0118965	AT1G21630.3;AT1G21630.1;AT1G21630.4;AT1G21630.2	1150;1172;1179;1201	1116900	0	351050	358960	2497500	0	0	0	0.999961	44.2826	1.23673e-13	120.45	81.148	120.45	1	FDS(1)IGSTR	FDS(44)IGS(-44)T(-59)R	2	0.58444
AT1G21630.3	1123	S	17.6997	16.6565	17.5056	17.7174	18.1553	18.1573	17.5518	17.9178	0.55075	0.0233969	1.28027	AT1G21630.3;AT1G21630.1;AT1G21630.4;AT1G21630.2	1123;1145;1152;1174	182530	0	174780	196650	743260	456940	204570	189750	0.999091	30.6142	3.9871e-09	95.094	85.931	92.993	1	Y(0.001)DS(0.999)FNAQSYDSSSNNNASETPK	Y(-31)DS(31)FNAQS(-47)Y(-47)DS(-66)S(-75)S(-75)NNNAS(-82)ET(-88)PK	2	1.1254
AT1G22060.2	261	S	17.9922	18.142	18.4515	18.8172	18.316	18.5867	18.2172	18.4602	0.0443	0.233538	0.380976	AT1G22060.2;AT1G22060.1	261;261	223570	551340	336690	0	830850	615340	324460	276360	0.999964	46.0999	3.57614e-14	115.82	98.007	115.82	1	SVVSGDLSGLAQS(1)PQK	S(-83)VVS(-46)GDLS(-50)GLAQS(46)PQK	2	0.52595
AT1G22280.2	118	S	19.4941	19.6487	19.5731	19.214	18.7207	18.9709	18.2822	18.6571	-0.82475	2.83306	0.000638448	AT1G22280.2;AT1G22280.1;AT1G22280.3	118;118;124	633170	1566700	732580	554880	1099900	803140	339400	316760	0.907193	10.9128	2.34561e-07	101.36	80.404	100.45	1	TDQAILS(0.019)NS(0.907)S(0.074)DLGR	T(-84)DQAILS(-17)NS(11)S(-11)DLGR	2	0.80794
AT1G22530.2	77	S	19.4966	23.0315	20.6286	25.5582	23.2095	23.5478	21.7637	21.961	0.441775	0.209675	0.416865	AT1G22530.2;AT1G22530.1	77;77	634280	16342000	0	0	24695000	19167000	3791100	3128400	0.939018	11.8748	2.24518e-82	181.85	166.93	181.85	1	EILQS(0.939)ES(0.061)FKEEGYLASELQEAEK	EILQS(12)ES(-12)FKEEGY(-80)LAS(-98)ELQEAEK	2	0.06178
AT1G22530.2	79	S	24.084	23.5105	23.6875	23.6508	23.5021	23.2672	23.663	23.4588	-0.260425	1.19442	0.0286833	AT1G22530.2;AT1G22530.1	79;79	15248000	22778000	12689000	12018000	30247000	15779000	14142000	8834700	0.999968	44.961	0	311.95	286.04	164.64	1	EILQSES(1)FK	EILQS(-45)ES(45)FK	2	0.039058
AT1G22620.1	472	S	15.951	20.0783	14.3205	13.746	17.0619	18.5091	18.7449	18.7013	2.23035	0.041863	1.03672	AT1G22620.1	472	0	2110100	0	0	0	0	467750	326620	1	64.0726	6.84312e-05	78.763	62.872	78.763	1	GES(1)ANDILSALANR	GES(64)ANDILS(-64)ALANR	2	0.12709
AT4G09800.1	2	S	14.6702	17.9313	16.4175	18.0567	18.6217	17.7653	16.8869	18.8642	1.2656	0.0491855	0.970308	AT4G09800.1;AT1G34030.1;AT1G22780.1	2;2;2	22355	476420	82210	248790	1026900	348230	0	0	1	93.9595	1.63005e-06	93.959	67.917	93.959	1	S(1)LVANEEFQHILR	S(94)LVANEEFQHILR	2	-1.1744
AT1G23080.2	357	S	13.9024	12.7598	14.8839	18.3747	16.0779	19.002	18.4643	18.2774	2.9752	0.016215	1.43594	AT1G23080.2;AT1G23080.4;AT1G23080.3;AT1G23080.1	357;357;357;357	0	0	0	310130	0	820640	385060	243460	0.942994	13.3411	0.000575455	71.344	53.855	49.089	0	ELHMFVWGS(0.044)NGS(0.943)PVS(0.013)DR	ELHMFVWGS(-13)NGS(13)PVS(-19)DR	3	-0.12311
AT1G23190.1	123	S	19.1563	21.4131	21.6785	21.0475	21.5405	21.3235	22.2871	21.1635	0.7548	0.0631903	0.868346	AT1G23190.1;AT1G70730.1;AT1G70730.2;AT1G70730.3	123;124;144;201	501000	5322500	3152400	1977700	7766000	4102000	5448900	1799900	0.999997	56.0313	0	315.3	284.19	280.59	1	ATGAFILTAS(1)HNPGGPTEDFGIK	AT(-160)GAFILT(-60)AS(56)HNPGGPT(-56)EDFGIK	2	-0.16675
AT1G23860.3	123	S	19.6711	18.2306	18.302	18.3556	18.5442	17.743	18.0796	18.062	-0.532625	0.973001	0.0488636	AT1G23860.3;AT1G23860.2;AT1G23860.1	123;123;123	715820	586250	303540	306060	973240	342870	294940	209700	0.999999	61.6925	9.38043e-09	107.57	14.99	107.57	1	S(1)PDYGYAR	S(62)PDY(-62)GY(-83)AR	2	-0.036452
AT1G70290.2	530	S	20.5599	20.248	20.0708	19.7807	21.1862	21.4537	20.284	20.6144	0.719725	0.0133451	1.51912	AT1G70290.2;AT1G70290.1;AT1G23870.1	530;568;573	1325400	2373500	1034400	821850	6074800	4489200	1359300	1230100	0.999745	35.9305	9.1645e-30	139.31	112.63	127.87	1	VLSLSPS(1)FRK	VLS(-71)LS(-36)PS(36)FRK	2	-0.1195
AT1G24160.2	40	S	19.6651	18.0202	19.2407	19.5596	17.3791	18.4198	18.1974	18.4191	-1.01755	1.48702	0.0143858	AT1G24160.2;AT1G24160.1	40;40	712840	506720	581820	0	433980	0	0	268600	0.982422	17.4735	4.49552e-21	127.75	109.49	96.163	1	AVASSNPSLQVS(0.018)VS(0.982)FGR	AVAS(-82)S(-74)NPS(-63)LQVS(-17)VS(17)FGR	2	0.487
AT1G24160.2	239	S	17.357	17.7244	18.1251	17.4669	17.3539	17.5545	17.8558	17.1115	-0.199425	0.674211	0.103327	AT1G24160.2;AT1G24160.1	239;239	143940	412780	268520	165300	426460	300880	252560	108510	0.99999	49.8839	1.83894e-07	90.694	82.74	90.694	1	EEVRDDIS(1)LQNDTVDANETTK	EEVRDDIS(50)LQNDT(-50)VDANET(-80)T(-84)K	3	-0.14952
AT1G24190.2	894	S	17.1257	12.5346	13.2214	13.6064	18.3114	17.5308	18.2583	18.3186	3.98275	0.00191162	2.35729	AT1G24190.2;AT1G24190.1;AT1G24190.3	894;898;894	122620	0	0	0	828160	0	333830	250520	0.999844	38.0749	0.000136546	52.483	45.494	52.483	1	VEREEGELS(1)PNGDFEEDNFAVYAK	VEREEGELS(38)PNGDFEEDNFAVY(-38)AK	3	-0.39915
AT1G24300.3	1234	S	17.4711	17.292	17.2357	17.1902	16.4471	16.7599	20.2886	16.1755	0.120525	0.261534	0.34448	AT1G24300.3;AT1G24300.2;AT1G24300.1	1234;1234;1239	155790	305870	144950	136450	227470	173460	0	56716	1	67.032	0.000237902	67.032	35.743	67.032	1	AFS(1)DEQINR	AFS(67)DEQINR	2	0.11197
AT1G24300.3	33	S	14.6932	19.0237	19.1428	18.2687	12.2847	19.3151	13.0597	13.2427	-3.30655	1.16023	0.0311184	AT1G24300.3;AT1G24300.2;AT1G24300.1;AT1G27430.2;AT1G27430.3;AT1G27430.1	33;33;33;33;33;33	22715	1015900	0	288170	0	1019500	0	0	0.802519	7.10459	0.00203462	43.297	33.016	43.297	1	ELAS(0.156)DNS(0.027)IPLS(0.803)PQWLY(0.001)T(0.013)K	ELAS(-7.1)DNS(-15)IPLS(7.1)PQWLY(-28)T(-18)K	2	-1.0688
AT1G24300.3	1256	S	21.3164	23.312	20.4959	21.2772	22.9581	22.496	22.8513	22.6983	1.15055	0.0240891	1.26795	AT1G24300.3;AT1G24300.2;AT1G24300.1	1256;1256;1261	2239100	19849000	1388800	2318900	20746000	9245400	8056500	5215000	1	117.034	1.63773e-94	203.76	172.94	203.76	1	NNS(1)LLSGIIDGGR	NNS(120)LLS(-120)GIIDGGR	2	-0.23855
AT1G24560.1	12	S	18.9185	16.8646	17.8032	19.316	20.4612	14.5412	12.3364	12.6963	-3.2168	1.11919	0.0343276	AT1G24560.1	12	0	0	214820	595560	3675300	0	0	0	0.978865	16.6573	1.1631e-05	59.356	56.594	43.497	1	ANGADEDAVLS(0.979)DVES(0.021)DEPAPVVLK	ANGADEDAVLS(17)DVES(-17)DEPAPVVLK	3	0.025879
AT1G24706.9	1458	S	22.3038	21.6275	21.9023	22.7969	21.5032	21.1945	21.2432	21.3583	-0.832825	2.01028	0.00426217	AT1G24706.9;AT1G24706.8;AT1G24706.3;AT1G24706.6;AT1G24706.5;AT1G24706.4;AT1G24706.1;AT1G24706.7;AT1G24706.2	1458;1557;1646;1646;1646;1646;1646;1647;1646	4439500	6175500	3681500	0	7567600	3751100	2642900	2060100	0.995891	24.35	0.00670577	50.843	33.142	46.663	1	RRS(0.996)EENLS(0.004)VSVDDAK	RRS(24)EENLS(-24)VS(-33)VDDAK	3	1.5687
AT1G24764.2	333	S	20.0213	19.5633	19.8332	21.4122	17.5183	18.0722	19.0644	19.0003	-1.7937	2.04166	0.0039636	AT1G24764.2;AT1G24764.1;AT1G24764.3	333;486;545	0	1476600	877290	0	0	0	583700	401830	0.999738	35.8236	0.00027016	64.55	23.961	64.55	1	ALLNGPGNYS(1)FNK	ALLNGPGNY(-36)S(36)FNK	2	0.63258
AT1G25260.1	230	S	19.4866	20.4509	18.5668	18.5996	21.7136	21.6902	21.3449	20.2308	1.9689	0.00286404	2.18224	AT1G25260.1	230	629890	2731900	364690	362450	8755800	5289100	2835900	942880	1	80.5717	1.09514e-92	203.2	188.52	203.2	1	EDLSELYREDLS(1)DVETS	EDLS(-82)ELY(-130)REDLS(81)DVET(-81)S(-81)	2	-0.17657
AT1G25570.1	606	S	18.7299	18.9509	20.4135	18.0191	18.6794	18.7437	18.0609	18.3115	-0.579475	0.803699	0.0742471	AT1G25570.1	606	372790	965860	0	242380	1068800	686110	291140	249290	1	72.2438	3.37944e-05	80.469	58.837	80.469	1	S(1)LMLLEMESQHAK	S(72)LMLLEMES(-72)QHAK	2	-0.37603
AT1G26110.2	382	S	19.0462	22.2728	19.9626	22.7017	23.1518	23.3122	22.9553	22.4403	1.96908	0.0160595	1.44005	AT1G26110.2;AT1G26110.1	382;382	464190	9658400	959610	6224500	23727000	16279000	8659100	4361200	0.998638	30.0944	4.60041e-78	172.28	162.31	172.28	1	PLLVTPGQLLQSGSSAVS(0.001)LS(0.999)PPSTNADK	PLLVT(-130)PGQLLQS(-99)GS(-91)S(-76)AVS(-30)LS(30)PPS(-35)T(-42)NADK	3	0.3139
AT1G26630.1	2	S	23.3348	23.5873	23.1218	22.8955	20.9151	20.67	20.842	20.4749	-2.50935	5.40931	1.73718e-06	AT1G26630.1;AT1G26630.2	2;2	9071800	24022000	8572500	7119600	5034200	2607700	2001300	1116700	1	160.866	0	295.37	225.45	281.07	1	S(1)DDEHHFEASESGASK	S(160)DDEHHFEAS(-160)ES(-210)GAS(-260)K	2	0.38534
AT1G27190.1	586	S	18.2742	18.9362	18.7476	17.7748	16.5785	16.441	18.0196	17.8572	-1.20913	1.61602	0.0106432	AT1G27190.1	586	271830	956090	0	0	0	0	282920	181950	0.998879	29.4976	9.33941e-05	65.943	47.579	65.943	1	HGVS(0.999)EHY(0.001)DEFPLVFNK	HGVS(29)EHY(-29)DEFPLVFNK	3	0.12858
AT1G27430.2	426	S	18.5768	18.9946	18.9792	18.8221	17.5021	18.3594	18.3448	18.387	-0.69485	1.88666	0.00567493	AT1G27430.2;AT1G27430.3;AT1G27430.1	426;426;426	335260	995560	485380	422910	0	525640	0	262680	0.927719	12.9175	2.37028e-08	66.479	50.78	58.137	1	LNSVASESY(0.002)GS(0.012)GGAGY(0.011)QLS(0.047)HGS(0.928)PEAVR	LNS(-44)VAS(-39)ES(-34)Y(-27)GS(-19)GGAGY(-19)QLS(-13)HGS(13)PEAVR	3	0.14395
AT1G27460.2	18	S	17.9761	17.8923	17.788	17.9342	17.7493	17.8279	17.6413	17.6122	-0.189975	1.90113	0.00548752	AT1G27460.2;AT1G27460.3;AT1G27460.1	18;18;18	221080	463720	0	228540	560940	0	217660	153530	0.979364	19.4319	0.00028154	60.628	33.007	49.12	1	FEDQPGS(0.979)PES(0.009)LAT(0.011)R	FEDQPGS(19)PES(-20)LAT(-19)R	2	-0.44393
AT1G27540.1	41	S	20.7122	20.7581	21.2388	20.9875	20.5728	20.7388	21.0507	21.0185	-0.07895	0.486581	0.171437	AT1G27540.1;AT1G27540.3;AT1G27540.2	41;41;11	1473000	3380300	2324200	1897100	3970800	2735000	2312700	1627700	0.999557	34.3207	1.98211e-92	196.84	154.37	99.5	1	TSS(1)IPDFEPVK	T(-41)S(-34)S(34)IPDFEPVK	2	0.080529
AT1G27595.1	640	S	19.5314	19.5454	20.2573	19.8702	20.0918	20.1608	19.7017	20.0176	0.1919	0.0892854	0.730882	AT1G27595.1	640	649770	1458400	1177100	874460	2845000	1832200	907920	813380	0.99982	38.5808	4.97044e-06	84.573	70.677	84.573	1	EISSLDVPLS(1)PCRDDEGIR	EIS(-44)S(-39)LDVPLS(39)PCRDDEGIR	3	0.47054
AT1G27600.2	9	S	18.3228	18.0669	17.231	17.2169	17.9046	17.6175	16.66	17.2512	-0.351075	0.694053	0.0981479	AT1G27600.2;AT1G27600.1	9;9	281140	523360	144480	139000	624710	314320	110250	119540	0.982981	17.8631	0.00781435	51.092	31.849	51.092	1	T(0.016)LS(0.983)PMY(0.001)HDR	T(-18)LS(18)PMY(-30)HDR	2	0.11807
AT1G27770.2	46	S	17.9009	17.4917	16.9494	17.241	17.8031	16.7652	16.3937	16.9061	-0.428725	0.85494	0.0653279	AT1G27770.2;AT4G37640.1;AT2G22950.1;AT1G27770.4;AT1G27770.1	46;45;45;46;46	0	351280	118860	141340	582240	174100	91670	94112	0.999994	52.0854	0.0020573	58.981	7.6349	58.981	1	FTANLS(1)K	FT(-52)ANLS(52)K	2	0.14881
AT1G27850.1	25	S	13.1811	14.9616	14.4996	17.1707	15.1666	17.9989	16.3731	17.2456	1.7428	0.0318132	1.15098	AT1G27850.1	25	0	0	0	134620	0	409440	0	119080	0.999991	50.6478	6.65666e-05	70.977	59.487	70.977	1	GHS(1)IEYGILFR	GHS(51)IEY(-51)GILFR	2	0.40219
AT1G28440.1	969	S	17.3655	17.1193	17.0023	16.2256	15.29	17.1278	16.5367	16.9619	-0.449075	0.711885	0.0937404	AT1G28440.1	969	144790	271360	123300	69921	0	223850	101220	0	1	50.5625	0.00594563	50.563	38.202	50.563	1	MLQEIGGGDEDS(1)LHK	MLQEIGGGDEDS(51)LHK	2	-0.71181
AT1G29400.3	53	S	16.3144	16.88	17.8533	17.7461	18.2255	19.0415	19.2461	19.1541	1.71835	0.0016382	2.42428	AT1G29400.3;AT1G29400.2;AT1G29400.1	53;53;53	69879	229890	222400	200600	0	0	662040	447050	1	68.7135	1.54973e-05	88.552	59.212	88.552	1	DGFS(1)LIDDTAVSR	DGFS(69)LIDDT(-69)AVS(-76)R	2	-1.9941
AT1G29400.3	34	S	17.6037	15.8405	16.5668	16.8387	14.1062	11.0991	14.6531	16.5197	-2.6179	1.46445	0.0151668	AT1G29400.3;AT1G29400.2;AT1G29400.1	34;34;34	170780	0	91172	0	0	0	0	71997	0.823332	7.44273	4.33554e-06	81.665	71.546	61.222	1	HHHPSSDATLFS(0.028)S(0.148)S(0.823)LPVFPR	HHHPS(-46)S(-46)DAT(-46)LFS(-15)S(-7.4)S(7.4)LPVFPR	3	0.48601
AT1G29400.3	792	S	20.2683	20.581	20.9016	20.5581	20.9357	20.9092	20.5528	20.7408	0.207375	0.054086	0.931462	AT1G29400.3;AT1G29400.2;AT1G29400.1	792;792;792	1082900	2989700	1839800	1408700	5106500	3077900	1637700	1342700	0.987365	18.929	1.63694e-28	139.98	113.78	117.74	1	NMDLLDS(0.013)QLS(0.987)DDDGRER	NMDLLDS(-19)QLS(19)DDDGRER	3	-0.064475
AT1G29400.3	384	S	19.2274	18.5686	19.3979	19.1041	18.7827	18.8261	19.1903	19.3364	-0.040625	0.365228	0.245111	AT1G29400.3;AT1G29400.2;AT1G29400.1	384;384;384	0	741060	648820	514190	1148200	726440	636920	507260	1	64.5504	0.000170849	64.55	42.505	64.55	2	S(1)PVFGLS(0.92)PT(0.08)R	S(65)PVFGLS(11)PT(-11)R	2	0.14025
AT1G29400.3	390	S	19.9175	20.2313	20.8147	20.5163	20.2953	20.3955	20.5311	20.716	0.114525	0.157881	0.516005	AT1G29400.3;AT1G29400.2;AT1G29400.1	390;390;390	849150	2346200	1732300	1368500	3276000	2155900	1613300	1319900	0.919608	10.5839	5.18915e-11	107.85	88.085	64.55	1;2	S(1)PVFGLS(0.92)PT(0.08)R	S(65)PVFGLS(11)PT(-11)R	2	0.14025
AT1G29530.1	202	S	18.7226	18.0839	17.5602	17.3913	18.1412	17.4071	17.9291	17.577	-0.1759	0.504261	0.163132	AT1G29530.1	202	370920	529580	181510	156860	736000	0	265730	149830	0.999991	50.3606	0.000112821	62.408	49.371	62.408	1	SEVPVS(1)PEEK	S(-50)EVPVS(50)PEEK	2	2.3964
AT2G34420.1	44	S	17.8945	15.9829	16.84	16.5389	17.6987	17.2327	19.589	16.8893	1.03835	0.0460906	0.997014	AT1G29930.1;AT1G29920.1;AT1G29910.1;AT2G34420.1	46;46;46;44	208930	0	110180	86883	541600	240730	839670	93020	0.998367	27.8619	1.96818e-05	83.314	72.163	83.314	1	GPS(0.998)GS(0.002)PWYGSDR	GPS(28)GS(-28)PWY(-73)GS(-75)DR	2	0.014092
AT2G34420.1	46	S	20.9933	21.1447	20.3589	20.2788	20.6392	20.3194	21.1253	21.6215	0.232425	0.13725	0.56709	AT1G29930.1;AT1G29920.1;AT1G29910.1;AT2G34420.1	48;48;48;46	1789900	4419100	1263000	1160800	4157900	2045100	0	0	0.999989	49.417	2.73919e-39	153.39	130.02	153.39	1	GPSGS(1)PWYGSDR	GPS(-49)GS(49)PWY(-85)GS(-82)DR	2	-1.5273
AT2G34420.1	51	S	18.9707	18.7477	18.0964	18.2855	19.0844	18.5109	19.0416	17.8873	0.105975	0.210895	0.414907	AT1G29930.1;AT1G29920.1;AT1G29910.1;AT2G34420.1	53;53;53;51	440510	839000	263230	0	1415200	583860	0	185780	0.999815	37.3677	6.67075e-10	107.09	77.748	107.09	1	GPSGSPWYGS(1)DR	GPS(-70)GS(-37)PWY(-59)GS(37)DR	2	0.073183
AT1G30440.1	279	S	18.7307	22.6106	19.5501	19.0281	20.0679	22.6552	20.3118	20.4099	0.881325	0.109177	0.6531	AT1G30440.1	279	373000	12207000	721020	487820	0	10324000	1385800	1067500	0.976327	19.4907	1.01097e-05	81.594	55.477	81.594	1	FS(0.002)T(0.011)PLGS(0.976)GNVLS(0.011)EEEQK	FS(-27)T(-20)PLGS(19)GNVLS(-19)EEEQK	2	1.829
AT1G30450.3	111	S	19.8372	19.618	18.494	19.1165	14.7565	19.1821	11.2175	14.9795	-4.23252	1.66578	0.00947823	AT1G30450.3;AT1G30450.2;AT1G30450.1	111;111;111	803160	1533700	0	518640	0	929730	0	0	0.787924	5.70317	1.25505e-19	130.24	109.65	52.5	1	SMTGEQIQAPS(0.212)S(0.788)PR	S(-46)MT(-38)GEQIQAPS(-5.7)S(5.7)PR	2	-0.76131
AT1G30470.3	696	S	19.5392	10.3509	13.9059	12.9034	19.5959	18.5915	18.9546	15.5307	3.99332	0.0248192	1.25534	AT1G30470.3;AT1G30470.2;AT1G30470.1	696;733;739	653290	0	0	0	2017500	0	540910	36274	0.971967	15.3998	3.58885e-63	174.62	154.61	174.62	1	LPDESGVEPT(0.028)ENS(0.972)PK	LPDES(-120)GVEPT(-15)ENS(15)PK	2	-0.34961
AT1G30690.2	53	S	19.2314	20.7617	20.8958	20.1149	21.6999	21.5203	20.9923	21.7476	1.23908	0.00547961	1.90175	AT1G30690.2;AT1G30690.1	53;53	527760	3388800	1832500	0	8673200	4701500	2221000	0	0.9921	20.9892	6.705e-76	185.61	162.62	185.61	1	S(0.008)AS(0.992)FKEESDFFADLK	S(-21)AS(21)FKEES(-90)DFFADLK	2	-0.20599
AT1G31440.1	264	S	18.7894	18.9223	19.1547	18.8378	16.9829	18.7919	18.4853	18.7789	-0.6663	1.04604	0.0409305	AT1G31440.1	264	388480	946910	548170	427510	0	709390	390730	344660	0.877773	8.56213	9.51343e-29	144.65	131.22	99.215	1	LHSEMIAEEEAIGS(0.122)S(0.878)PK	LHS(-82)EMIAEEEAIGS(-8.6)S(8.6)PK	2	0.39771
AT1G31460.1	84	S	18.0273	17.611	17.776	17.7711	17.1641	17.6482	17.687	17.8117	-0.2186	0.927155	0.0546604	AT1G31460.1	84	229070	381560	210800	204100	373890	321080	224670	176300	0.999951	43.1344	0.00141784	46.706	34.492	46.706	1	S(1)VNVNFSGNR	S(43)VNVNFS(-43)GNR	2	-0.54511
AT1G31870.2	244	S	17.2769	17.6353	16.7243	17.0497	16.1342	16.5957	16.4501	17.003	-0.6258	1.56116	0.0120965	AT1G31870.2;AT1G31870.1	244;244	136170	388050	101690	123790	0	154800	95328	0	0.995159	23.1298	0.000433216	61.641	43.897	61.641	1	RDLHGS(0.995)PVS(0.005)DVK	RDLHGS(23)PVS(-23)DVK	3	0.50065
AT1G31870.2	286	S	19.2535	19.3507	19.7251	19.5883	19.2462	19.3859	19.2833	19.2979	-0.176075	1.07896	0.0378083	AT1G31870.2;AT1G31870.1	286;286	535920	1274300	813980	719240	1583200	1070800	679340	493890	1	76.565	3.06097e-14	119.32	119.32	109.84	1	SFGSNADLS(1)PPGR	S(-100)FGS(-77)NADLS(77)PPGR	2	-0.2461
AT1G31870.2	204	S	19.2404	18.1347	18.5859	18.0631	18.473	18.8081	18.8004	18.893	0.2376	0.107395	0.659393	AT1G31870.2;AT1G31870.1	204;204	0	548580	369560	249890	926330	717420	486090	373040	0.999854	38.3528	1.8797e-06	81.865	49.259	81.865	1	YLSEDLS(1)PPR	Y(-70)LS(-38)EDLS(38)PPR	2	0.34703
AT1G32130.2	193	S	20.7151	20.5345	20.9142	20.3769	20.5354	20.2155	21.0023	19.7844	-0.250775	0.690278	0.0991104	AT1G32130.2;AT1G32130.1	193;193	0	2894900	1855900	1242400	3869100	1903000	0	691950	0.948589	12.864	1.14289e-31	126.56	109.76	91.976	1	Y(0.002)GGDAGDRS(0.949)PT(0.049)HYPQAEEGEDEDEVNNLFK	Y(-27)GGDAGDRS(13)PT(-13)HY(-34)PQAEEGEDEDEVNNLFK	3	-0.027187
AT1G32150.1	156	S	19.3833	20.2818	19.648	20.7707	19.5848	20.1709	19.5445	19.3354	-0.36205	0.75175	0.0846598	AT1G32150.1	156	586370	2429800	771640	0	2002000	1845100	814180	506890	0.999604	34.0168	8.49775e-09	103.88	89.878	103.88	1	GS(1)LGSLNMIIGK	GS(34)LGS(-34)LNMIIGK	2	0.40713
AT1G32400.3	196	S	21.0125	21.1975	21.0048	20.9928	21.3379	21.4664	20.9596	20.931	0.121825	0.10438	0.670311	AT1G32400.3;AT1G32400.2;AT1G32400.1	196;196;196	1813900	4583600	1976300	1904000	6748200	4529100	2171200	1532000	1	87.9637	1.75425e-194	250.27	234.09	250.27	1	AANTPAEYDS(1)DDEYLAPR	AANT(-120)PAEY(-88)DS(88)DDEY(-100)LAPR	2	-0.19588
AT1G32400.3	233	S	20.6936	20.6422	19.9494	20.0135	20.8978	20.9499	20.5496	20.5095	0.402025	0.0292873	1.18567	AT1G32400.3;AT1G32400.2;AT1G32400.1	233;233;233	1454100	3119300	950920	965760	4973900	3166100	1634100	1143800	0.995309	23.2677	1.71218e-17	114.88	102.03	88.222	1	QAAPVTGVPVAPT(0.005)LDQRPS(0.995)R	QAAPVT(-64)GVPVAPT(-23)LDQRPS(23)R	3	0.13569
AT1G32400.3	260	S	21.3494	21.5554	20.8744	21.2455	21.3918	22.0425	21.1316	21.3305	0.217925	0.0984038	0.693046	AT1G32400.3;AT1G32400.2;AT1G32400.1	260;260;260	2291000	5874500	1805500	2268600	7005100	6751600	2446100	2020700	0.99852	28.2908	0	386.69	349.11	155.88	1	YGLDTSEFTYNPS(0.001)ES(0.999)HR	Y(-150)GLDT(-130)S(-120)EFT(-88)Y(-89)NPS(-28)ES(28)HR	3	-0.01327
AT1G33240.1	650	S	18.3335	19.7313	20.3432	19.6125	19.4578	19.8962	20.1479	19.6648	0.28655	0.138335	0.564184	AT1G33240.1;AT1G33240.2	650;611	283230	1659000	1249300	731430	1833300	1525200	1237000	636930	1	117.672	2.10829e-50	165.64	139.1	137.8	1	SAAFEIAFQS(1)PANR	S(-120)AAFEIAFQS(120)PANR	2	-0.34285
AT1G33990.1	77	S	19.0732	16.4258	18.4514	18.0741	18.5283	18.1172	17.3565	18.1969	0.0436	0.278191	0.325137	AT1G33990.1	77	472940	0	0	251810	962530	0	0	230250	0.999629	35.0261	1.24207e-05	76.143	66.156	74.944	1	TLS(1)DPFSNGK	T(-35)LS(35)DPFS(-42)NGK	2	-0.0095016
AT1G34220.2	353	S	17.3323	19.8499	16.6755	19.1488	20.2931	12.7999	13.0497	16.5806	-2.5708	0.943198	0.052553	AT1G34220.2;AT1G34220.1	353;383	141500	1801200	98308	530360	3270900	0	0	0	1	80.9939	1.6129e-07	83.606	70.549	83.606	1	KIS(1)DGDLQDVLMAAQAAADSAER	KIS(81)DGDLQDVLMAAQAAADS(-81)AER	3	0.071523
AT1G34220.2	327	S	17.0851	17.8095	18.4627	18.6406	18.1751	18.7579	18.0561	17.8849	0.219025	0.156292	0.519652	AT1G34220.2;AT1G34220.1	327;357	119220	437850	339300	0	753540	692880	290180	185470	0.983304	17.7256	4.46711e-05	77.562	68.607	70.281	1	NY(0.017)S(0.983)PPSIDAVGPIPTK	NY(-18)S(18)PPS(-40)IDAVGPIPT(-64)K	2	0.61719
AT1G34220.2	469	S	19.8906	20.1253	19.7248	19.7051	20.2859	20.2806	19.7081	19.8861	0.178725	0.0823674	0.762562	AT1G34220.2;AT1G34220.1	469;499	833450	2180000	813830	779900	3254600	1990900	911920	742510	0.997538	26.0937	1.28489e-28	141	123.26	124.45	1	QNS(0.998)S(0.002)FSSYGDLTPQR	QNS(26)S(-26)FS(-51)S(-59)Y(-76)GDLT(-100)PQR	2	0.047107
AT1G34320.2	586	S	16.4361	14.8811	17.1405	14.2703	15.622	16.5351	16.5438	16.7314	0.676075	0.0911961	0.722609	AT1G34320.2;AT1G34320.1	586;586	0	0	135700	18031	0	148430	101720	83375	0.999994	51.8985	0.000251909	66.056	30.514	66.056	1	S(1)QEFETVAK	S(52)QEFET(-52)VAK	2	-0.089518
AT1G35160.1	248	S	17.163	17.909	17.049	17.1913	18.2816	18.377	18.0148	19.4357	1.1992	0.00380234	2.05964	AT1G35160.1	248	0	469130	127360	136560	811230	532090	281980	0	0.999906	40.4374	1.54732e-15	120.9	107.22	120.24	1	DNLTLWTSDMQDES(1)PEEIK	DNLT(-89)LWT(-55)S(-40)DMQDES(40)PEEIK	2	-1.5378
AT1G35220.7	232	S	19.8142	19.5336	19.4111	19.2573	19.5922	21.525	19.8038	18.8154	0.43005	0.121705	0.611908	AT1G35220.7;AT1G35220.4;AT1G35220.6;AT1G35220.5;AT1G35220.3;AT1G35220.2;AT1G35220.1	232;232;255;311;327;327;327	790430	1446600	654770	571810	2012300	0	0	353490	0.999977	46.4078	3.35991e-07	90.614	77.625	77.593	1	AILS(1)DDEDASR	AILS(46)DDEDAS(-46)R	2	-0.50178
AT1G35220.7	785	S	17.024	15.8792	16.8918	16.9325	16.2048	15.5361	15.8121	16.3895	-0.69625	1.39893	0.0176876	AT1G35220.7;AT1G35220.4;AT1G35220.6;AT1G35220.5;AT1G35220.3;AT1G35220.2;AT1G35220.1	785;785;808;864;880;880;880	114270	114880	0	0	192300	0	61256	65784	0.999665	34.7468	0.0204197	45.161	32.205	45.161	1	LMNYAS(1)GR	LMNY(-35)AS(35)GR	2	0.059899
AT1G35460.2	31	S	17.1465	19.9153	19.6112	20.1918	21.3387	20.5192	21.4245	20.5989	1.75412	0.0121957	1.55766	AT1G35460.2;AT1G35460.1	31;31	124400	1884700	0	1092800	6752100	2348900	2996700	1217000	0.997907	26.7834	1.78766e-43	151.47	87.837	84.874	1	S(0.998)APAT(0.002)WIETLLEEDEEEGLK	S(27)APAT(-27)WIET(-72)LLEEDEEEGLK	2	-0.11836
AT1G35580.2	11	S	20.2092	20.0465	20.2719	19.8873	20.0018	19.7056	19.6355	19.6272	-0.3612	1.87898	0.00577702	AT1G35580.2;AT1G35580.1;AT1G35580.3	11;11;11	1039400	2064100	1189100	884910	2673000	1336400	867200	620520	0.999807	37.2572	8.78643e-22	133.71	117.59	95.347	1;2	AVGS(1)HCSLSEMDDLDLTR	AVGS(37)HCS(-37)LS(-53)EMDDLDLT(-79)R	2	-0.26116
AT1G35580.2	14	S	19.3806	18.6358	18.3505	19.0675	17.4872	18.3791	17.6014	19.0217	-0.73625	1.17279	0.0301998	AT1G35580.2;AT1G35580.1;AT1G35580.3	14;14;14	585280	776400	313930	501300	467740	532870	211730	407850	0.979692	18.8078	4.20161e-06	83.063	76.172	54.281	1;2	AVGS(0.007)HCS(0.98)LS(0.013)EMDDLDLTR	AVGS(-21)HCS(19)LS(-19)EMDDLDLT(-39)R	2	-0.70734
AT1G35580.2	39	S	16.604	12.8292	13.4045	14.2935	15.8449	11.8937	12.038	13.1559	-1.04967	0.6694	0.104628	AT1G35580.2;AT1G35580.1;AT1G35580.3;AT4G09510.2;AT1G22650.2;AT1G22650.1;AT4G09510.1	39;39;39;45;32;32;45	85413	13871	0	0	149840	0	0	0	1	57.7081	0.0470276	57.708	23.787	57.708	0	KRS(1)FDER	KRS(58)FDER	2	0.19181
AT1G35580.2	547	S	22.3264	22.1436	22.4458	22.045	12.3584	21.8759	11.4669	13.775	-7.37115	1.97109	0.00466672	AT1G35580.2;AT1G35580.1	547;547	4509400	8831100	5365600	3948500	0	6015500	0	0	0.945109	12.3598	0.000987048	69.276	61.626	69.276	1	RS(0.055)AS(0.945)WPQL	RS(-12)AS(12)WPQL	2	-0.12277
AT1G35580.2	44	S	19.2289	18.8344	18.6876	18.8128	18.8158	18.3833	18.6571	18.7368	-0.242675	1.10382	0.0356164	AT1G35580.2;AT1G35580.1;AT1G35580.3	44;44;44	526840	890950	396550	420180	1174800	534440	440120	334750	0.998474	28.1574	2.26538e-10	110.08	92.268	110.08	1	S(0.998)MS(0.002)ELSTGYSR	S(28)MS(-28)ELS(-87)T(-92)GY(-99)S(-100)R	2	0.15995
AT1G35580.2	73	S	12.8724	20.0645	12.5469	13.4308	19.5427	19.8805	19.5932	19.6593	4.94028	0.00718678	1.78485	AT1G35580.2;AT1G35580.1;AT1G35580.3	73;73;73	0	2090000	0	0	1944400	0	842140	0	0.872704	8.45384	3.59973e-08	98.105	72.631	96.64	1	SVLDT(0.003)PLS(0.873)S(0.125)AR	S(-92)VLDT(-25)PLS(8.5)S(-8.5)AR	2	-0.1326
AT1G36310.2	45	S	17.2633	13.0554	12.7823	12.5334	15.9167	17.9429	18.3281	17.7593	3.57815	0.00618211	1.84973	AT1G36310.2;AT1G36310.1	45;45	134890	0	0	0	0	393840	0	170010	0.946868	12.556	1.85736e-20	125.28	106.07	125.28	1	EFLT(0.001)S(0.053)S(0.947)DEEEESVSIR	EFLT(-32)S(-13)S(13)DEEEES(-49)VS(-56)IR	2	-0.36189
AT1G36310.2	238	S	17.8643	18.0182	18.2524	17.9876	17.673	17.6264	17.8114	17.7325	-0.3198	2.21332	0.00266561	AT1G36310.2;AT1G36310.1	238;238	204590	506000	293280	237150	532030	316250	244900	166880	0.908894	9.98969	0.000228198	80.967	70.022	80.967	1	YVEEWVGPGS(0.091)PMNS(0.909)PR	Y(-75)VEEWVGPGS(-10)PMNS(10)PR	2	-0.074825
AT1G37130.1	534	S	23.6798	23.757	23.4686	23.0694	23.2439	23.1349	22.8368	22.7336	-0.5064	1.68515	0.00906074	AT1G37130.1	534	11522000	27022000	10902000	8031600	25290000	14397000	7976300	5344300	0.999186	31.038	5.41596e-29	137.95	125.33	118.76	1	SVS(0.999)T(0.001)PFMNTTAK	S(-46)VS(31)T(-31)PFMNT(-84)T(-89)AK	2	-0.29055
AT1G42550.1	455	S	18.6248	18.7139	18.9513	18.9379	19.4154	19.5761	18.9308	19.169	0.46585	0.00635351	1.83793	AT1G42550.1	455	346600	819550	476060	458230	1780200	1221700	532080	451680	1	85.1196	2.53621e-20	117.82	108.83	117.82	1	DES(1)DGGDGETESQRLDEEEQTVTK	DES(85)DGGDGET(-85)ES(-96)QRLDEEEQT(-100)VT(-110)K	3	-0.74752
AT1G42550.1	464	S	20.2653	20.2439	20.7924	20.5156	20.5788	20.6406	20.5823	20.9718	0.239075	0.04183	1.03704	AT1G42550.1	464	1080600	2366700	1705700	1367800	3987200	2555100	1671600	1575900	0.997431	25.9038	7.06351e-61	169.7	159.28	169.7	1	DESDGGDGET(0.003)ES(0.997)QRLDEEEQTVTK	DES(-120)DGGDGET(-26)ES(26)QRLDEEEQT(-52)VT(-60)K	3	-0.93821
AT1G42550.1	407	S	18.3366	16.3595	18.9604	18.6964	19.4042	19.2316	20.0173	20.6573	1.73937	0.00912416	1.68214	AT1G42550.1	407	283850	160260	479090	387620	1766400	962190	0	0	0.993836	25.085	1.48933e-12	103.29	83.748	87.85	1	GVEFDDDLET(0.003)EKS(0.994)DGT(0.003)IGER	GVEFDDDLET(-25)EKS(25)DGT(-25)IGER	2	-0.085545
AT1G42550.1	439	S	18.8086	18.8343	19.0548	18.7496	18.4222	17.8477	18.2919	18.6678	-0.554425	1.92424	0.00520174	AT1G42550.1	439	393690	890890	511490	402160	894290	368700	341710	319130	0.999995	52.6314	0.000331347	60.518	52.298	60.518	1	LTELDS(1)IAK	LT(-53)ELDS(53)IAK	2	-0.28273
AT1G42550.1	314	S	22.9595	22.2486	21.893	22.2496	22.7093	22.4064	22.326	22.5653	0.164075	0.130348	0.586224	AT1G42550.1	314	6993700	9498200	3657700	4550100	17459000	8689200	5597900	4755700	1	87.258	3.16175e-38	156.35	149.29	87.258	1	NFANS(1)FGR	NFANS(87)FGR	2	0.4809
AT1G42550.1	78	S	21.4339	20.8513	20.8943	20.8239	20.9529	21.554	20.9454	21.2641	0.17825	0.102034	0.679059	AT1G42550.1	78	2429200	3605800	1830500	1693700	5167700	4812600	2150000	1929800	0.97744	16.3675	2.6373e-08	105.2	35.384	71.349	1	RLS(0.977)LS(0.023)PWR	RLS(16)LS(-16)PWR	2	-0.1344
AT1G42550.1	41	S	20.0396	19.3651	18.3057	18.5432	19.4387	19.1967	18.7118	18.8103	-0.024025	0.319922	0.282926	AT1G42550.1	41	924120	1287100	304320	348550	1809200	939170	457140	352260	0.999975	45.9568	1.4554e-13	119.68	88.259	103.55	1	TNS(1)LALPR	T(-46)NS(46)LALPR	2	0.35592
AT1G42550.1	507	S	18.0758	18.9413	19.7873	19.2213	18.6587	18.1792	18.6211	18.0734	-0.623325	1.10159	0.0358073	AT1G42550.1	507	236900	959490	849870	557720	1053600	463940	429270	211360	0.991998	20.9332	4.32164e-52	167.71	159.2	167.71	1	S(0.008)GES(0.992)VDDESENYLSDLGK	S(-21)GES(21)VDDES(-110)ENY(-130)LS(-140)DLGK	2	-0.10619
AT1G42550.1	328	S	22.1163	21.9972	21.9157	21.5813	22.2442	21.9183	21.664	21.5602	-0.05595	0.409364	0.214396	AT1G42550.1	328	3898300	7979100	3715700	2863100	12648000	6195000	3537900	2369500	0.999923	41.1573	2.58755e-20	129.84	75.799	129.84	1;2	TSFSVPS(1)PK	T(-110)S(-96)FS(-41)VPS(41)PK	2	0.13016
AT1G43690.1	46	S	17.4545	16.021	17.4487	16.7156	15.7467	16.3589	17.1452	17.3776	-0.25285	0.497562	0.166221	AT1G43690.1	46	154010	0	168010	98202	0	0	154330	130490	0.962226	14.6268	3.52501e-13	105.77	92.793	104.61	1	PIEEEETGSGS(0.005)QS(0.033)GGES(0.962)PEAK	PIEEEET(-49)GS(-40)GS(-23)QS(-15)GGES(15)PEAK	2	0.4433
AT1G43700.1	115	S	15.7906	18.8014	18.649	19.1097	19.5184	20.1617	20.1643	19.2868	1.69512	0.0176053	1.40092	AT1G43700.1	115	48603	870780	386090	516180	1911900	1833300	1251100	490120	0.994243	22.3851	1.14726e-22	133.45	118.25	133.45	1	S(0.006)FS(0.994)VDSDFFDDLGVTEEK	S(-22)FS(22)VDS(-48)DFFDDLGVT(-110)EEK	2	-0.027668
AT1G44910.2	858	S	20.8197	19.9299	19.5629	19.3828	19.8453	19.5559	19.4408	19.004	-0.462325	0.900817	0.0583177	AT1G44910.2;AT1G44910.1	858;858	1586900	1903900	727420	623750	2398200	1204700	757720	0	0.999904	40.1615	1.97899e-15	122.18	117.79	81.574	1	REES(1)DGETAMDVSEGHK	REES(40)DGET(-40)AMDVS(-77)EGHK	3	-0.20752
AT1G45688.2	30	S	19.0895	19.0869	18.0018	17.5939	19.2335	19.0469	17.8799	17.8843	0.068125	0.260262	0.346026	AT1G45688.2;AT1G45688.1	30;30	478320	1061400	246510	180510	1569300	846570	256810	185400	0.999749	36.0083	8.0274e-11	108.35	76.019	108.35	1	RPVYYVQS(1)PSR	RPVY(-74)Y(-66)VQS(36)PS(-36)R	2	0.74869
AT1G47970.1	187	S	19.3858	18.6488	18.7375	18.7993	18.9025	18.0256	18.6518	19.9164	-0.018775	0.315873	0.286677	AT1G47970.1	187	587370	0	410490	0	1247600	417070	438520	0	1	57.4956	1.88706e-05	88.264	80.077	57.496	1	RAPEEDEEDS(1)GDEDDDRPPK	RAPEEDEEDS(57)GDEDDDRPPK	3	0.54385
AT1G48090.5	3169	S	19.9825	19.8125	19.3955	19.3617	19.3122	19.3471	19.1786	19.552	-0.290575	1.14725	0.0320984	AT1G48090.5;AT1G48090.6;AT1G48090.4;AT1G48090.1;AT1G48090.3;AT1G48090.2	3169;3196;3196;3210;3218;3237	888230	1755100	647750	614700	1657300	1042400	631790	589000	1	53.7564	0.00553561	60.518	40.672	53.756	1	NPVFS(1)MER	NPVFS(54)MER	2	-0.11073
AT1G48120.1	961	S	18.5038	19.002	19.288	18.9123	19.2935	19.5148	18.9089	20.9604	0.742875	0.0385922	1.07044	AT1G48120.1	961	318710	1000700	0	450190	1635900	1170900	524060	0	1	62.9238	0.000771919	72.496	58.238	62.924	1	FQPLEAVS(1)PRPK	FQPLEAVS(63)PRPK	2	0.082665
AT1G48210.7	353	S	17.0893	16.4323	17.2329	16.9103	16.6545	15.8113	15.7289	19.2349	-0.0588	0.324993	0.27832	AT1G48210.7;AT1G48210.3;AT1G48210.2;AT1G48210.1;AT3G17410.2;AT3G17410.1	353;353;353;353;354;354	119560	168560	0	0	262630	89873	0	0	1	74.7599	0.000146594	74.76	71.537	74.76	2	S(1)APQT(1)PHRNPY	S(75)APQT(60)PHRNPY(-60)	2	-0.19689
AT1G48620.1	334	S	20.3271	20.7998	20.6852	20.4695	18.6623	18.6017	19.746	20.7375	-1.13353	1.44834	0.0157505	AT1G48620.1	334	1127900	3479400	1583600	1324800	1056200	621800	0	0	0.820568	6.60216	7.57536e-11	78.913	66.947	69.885	1	RVDAGGASSVAPPPPPPT(0.179)NVES(0.821)GGEEVAVK	RVDAGGAS(-62)S(-62)VAPPPPPPT(-6.6)NVES(6.6)GGEEVAVK	3	-0.030341
AT1G48920.1	413	S	19.9627	19.9776	20.158	20.0768	19.8601	19.9123	19.9989	19.9067	-0.124275	1.51326	0.0135292	AT1G48920.1	413	876170	1967900	1098800	1009100	2422800	1542300	1115600	753180	0.999144	30.6734	5.80062e-21	128.54	111.87	109	1	GFDAS(0.001)LS(0.999)EDDIK	GFDAS(-31)LS(31)EDDIK	2	-0.089984
AT1G48920.1	270	S	18.3383	17.8405	18.0849	17.6881	18.3395	17.786	18.1176	19.5914	0.470675	0.071743	0.817383	AT1G48920.1	270	284180	447370	261130	192690	844500	353260	0	0	0.986471	18.6281	2.29165e-05	86.467	64.381	62.14	1	KS(0.014)S(0.986)DVEMVDAEK	KS(-19)S(19)DVEMVDAEK	2	0.91426
AT1G49040.4	770	S	17.65	17.9313	17.483	17.0524	17.6246	17.7273	16.715	17.0304	-0.25485	0.664157	0.106067	AT1G49040.4;AT1G49040.2;AT1G49040.3;AT1G49040.1	770;770;770;770	176360	476430	172060	124020	514490	339170	114540	102580	0.999774	36.4579	9.65802e-05	89.013	72.381	89.013	1	QQAISAGLPS(1)PRPK	QQAIS(-36)AGLPS(36)PRPK	2	0.63502
AT1G49340.4	1104	S	18.4242	21.6239	19.0919	20.0187	21.3168	20.1855	20.5276	20.0502	0.73035	0.0881183	0.736033	AT1G49340.4;AT1G49340.3;AT1G49340.2;AT1G49340.1	1104;1104;1111;1111	301600	6159800	524820	969250	6650500	0	1609400	831940	0.951769	12.9641	0.000455884	44.596	38.138	44.596	1	LIS(0.952)GAFS(0.048)QAPQPEDDSFNEMLIAR	LIS(13)GAFS(-13)QAPQPEDDS(-39)FNEMLIAR	3	1.0824
AT1G49730.4	475	S	19.0288	13.2932	13.7336	12.5735	18.8609	19.0605	17.9796	18.1481	3.855	0.0092945	1.6742	AT1G49730.4;AT1G49730.1	475;505	458610	0	0	0	1212100	0	275190	222590	0.893376	9.24312	8.21301e-11	102.87	60.129	66.262	1	LSDFGLAHS(0.893)S(0.106)R	LS(-35)DFGLAHS(9.2)S(-9.2)R	2	0.64215
AT1G50120.1	267	S	18.849	18.7932	19.0517	18.7981	18.7574	19.0273	18.6416	18.556	-0.127425	0.787118	0.07741	AT1G50120.1;AT1G50120.2	267;267	404870	865860	0	415910	1128200	835110	0	295320	0.996734	28.119	6.97509e-07	99.531	77.9	98.531	1	TFGSS(0.002)LS(0.997)LNS(0.002)GPR	T(-80)FGS(-37)S(-28)LS(28)LNS(-28)GPR	2	0.41208
AT1G50480.1	12	S	17.1932	21.6714	24.2466	20.6791	22.7726	22.2691	22.9257	21.9558	1.53322	0.0807263	0.770508	AT1G50480.1	12	128490	6366100	0	1532000	18242000	7900000	8483400	3117100	1	97.6719	1.74002e-64	160.43	153.78	147.3	1	LEVVS(1)PVPADIDIANSVEPLHISEIAK	LEVVS(98)PVPADIDIANS(-98)VEPLHIS(-130)EIAK	3	0.3093
AT1G51140.1	213	S	19.2268	19.5537	19.3188	19.1731	19.3515	19.6098	19.893	19.4068	0.247175	0.0332479	1.13254	AT1G51140.1	213	526090	1466900	614180	539390	1703000	1250600	0	532620	0.999902	40.1056	3.91226e-05	84.289	63.512	76.522	1	AMS(1)PISEVDVK	AMS(40)PIS(-40)EVDVK	2	0.20858
AT1G51140.1	290	S	18.3329	16.9558	18.1219	18.2927	17.2834	17.8321	17.0955	17.9704	-0.380475	0.738093	0.0876562	AT1G51140.1	290	0	242290	0	293000	406130	364730	149100	196800	0.990811	20.3278	4.72942e-10	110.77	93.493	85.42	1	S(0.009)LS(0.991)DIEQLLSDSIPCK	S(-20)LS(20)DIEQLLS(-62)DS(-62)IPCK	2	-0.57576
AT1G51140.1	234	S	17.7514	17.2969	16.854	17.1325	17.5428	16.9528	17.1544	17.4288	0.011	0.28546	0.317179	AT1G51140.1	234	189190	306920	111260	131100	486130	198270	155320	135200	0.99709	25.3483	0.00419891	41.502	25.348	41.502	1	T(0.003)LS(0.997)GGFNR	T(-25)LS(25)GGFNR	2	-0.13821
AT1G51140.1	259	S	16.7872	15.1936	15.5778	16.1452	16.8079	12.4615	13.6659	14.171	-1.64938	1.14424	0.0323299	AT1G51140.1	259	96975	0	0	66132	292100	0	0	0	0.975639	16.1241	0.00135945	47.198	29.83	47.198	1	T(0.024)QS(0.976)GGLDQY(0.001)K	T(-16)QS(16)GGLDQY(-33)K	2	0.92501
AT1G51500.1	684	S	20.237	18.6113	17.2143	18.0965	18.9453	18.7702	16.8459	18.1968	-0.350225	0.472172	0.178587	AT1G51500.1	684	0	763320	0	255750	1285100	698790	0	230230	0.994667	22.884	2.07077e-08	96.163	81.602	74.772	1	HQPLHSLSSQEGLT(0.005)S(0.995)PIN	HQPLHS(-41)LS(-41)S(-41)QEGLT(-23)S(23)PIN	2	-0.075079
AT1G51500.1	661	S	21.1342	20.8507	20.8788	20.6432	20.8752	21.131	20.633	20.8484	-0.004825	0.312424	0.289928	AT1G51500.1	661	1973500	3604400	1811000	1494300	4896800	3589500	1731300	1446700	0.999858	39.4403	1.35742e-08	100.55	83.08	96.604	1	VPS(1)LSSLSSR	VPS(39)LS(-39)S(-46)LS(-65)S(-64)R	2	-0.25351
AT1G51510.1	32	S	19.2242	20.7148	19.0588	20.5394	20.7905	21.4157	21.2704	20.9262	1.2164	0.00811633	1.73248	AT1G51510.1	32	525120	3280200	512890	1390600	4617500	4372600	2693100	1526900	1	67.3066	1.33142e-36	134.36	130.08	130.82	1	ANIESEAVDFEPEEDDLMDEEGTAIDGADVS(1)PR	ANIES(-110)EAVDFEPEEDDLMDEEGT(-67)AIDGADVS(67)PR	3	-0.44875
AT1G51600.2	125	S	18.9332	18.695	18.9451	18.5112	18.5506	18.92	18.4991	18.533	-0.14545	0.757369	0.0834597	AT1G51600.2;AT1G51600.1	125;125	429220	808870	474050	340910	977510	775300	394480	290660	1	40.81	0.00169359	41.912	32.97	40.81	1	ELPQAAPPGLGS(1)PHQNNR	ELPQAAPPGLGS(41)PHQNNR	3	-0.85788
AT1G51690.2	459	S	20.3158	19.0621	18.8739	18.7981	17.4139	18.7003	19.0258	19.1738	-0.684025	0.905337	0.0576719	AT1G51690.2;AT1G51690.4;AT1G51690.1;AT1G51690.3;AT1G51690.5	459;460;460;550;557	1119100	1043300	451200	415910	0	665750	0	453180	0.970239	15.1542	7.2214e-05	88.819	23.573	88.819	1	ALS(0.97)S(0.03)ITR	ALS(15)S(-15)IT(-38)R	2	0.19529
AT1G51805.2	528	S	13.4712	12.0247	20.9583	11.6434	18.2853	21.4481	19.9544	19.9728	5.39075	0.0122198	1.55682	AT1G51805.2;AT1G51805.1	528;552	0	0	1913500	0	0	4471800	1081700	788510	0.989626	23.9249	1.1922e-05	79.81	49.677	79.81	1	VEGTLPS(0.004)Y(0.002)MQAS(0.004)DGRS(0.99)PR	VEGT(-53)LPS(-24)Y(-26)MQAS(-24)DGRS(24)PR	2	0.28103
AT1G52380.4	114	S	21.5871	20.5584	21.0708	20.4188	20.4893	20.5664	20.4294	20.2994	-0.46265	1.1556	0.0314643	AT1G52380.4;AT1G52380.3;AT1G52380.2;AT1G52380.1	114;114;114;114	0	2943200	2068700	1279100	3747400	2427000	1503500	988830	0.999999	58.3196	1.22183e-08	88.688	73.409	85.866	1	LAPAEAVVEDNQKAS(1)DIEEGDEVDSK	LAPAEAVVEDNQKAS(58)DIEEGDEVDS(-58)K	3	-0.48662
AT1G52780.1	1041	S	19.6989	19.8041	19.3722	21.4688	19.1523	19.2018	19.4682	18.8492	-0.918125	1.26658	0.0241676	AT1G52780.1	1041	729760	1744900	637350	0	1483400	942530	0	361870	0.999478	32.8347	1.10909e-05	83.617	67.728	81.494	1	VMS(0.999)ES(0.001)EMVSGAR	VMS(33)ES(-33)EMVS(-59)GAR	2	-0.12862
AT1G53165.1	653	S	13.6778	18.7991	13.9016	14.7458	17.1004	19.0143	19.465	18.5864	3.26045	0.0101206	1.63763	AT1G53165.1;AT1G53165.2;AT1G53165.3	653;657;661	0	869390	0	0	0	827630	0	301610	0.924935	10.9068	2.41331e-09	104.87	73.994	104.87	1	EFS(0.925)S(0.075)NANFSPLAR	EFS(11)S(-11)NANFS(-67)PLAR	2	-0.86715
AT1G53165.1	654	S	15.8798	18.7991	13.3326	13.8305	18.7855	19.0143	17.993	18.5864	3.1343	0.0104265	1.62485	AT1G53165.1;AT1G53165.2;AT1G53165.3	654;658;662	0	869390	0	0	0	827630	0	301610	0.874846	8.45752	2.55694e-05	86.624	67.353	62.14	1	EFS(0.125)S(0.875)NANFSPLAR	EFS(-8.5)S(8.5)NANFS(-34)PLAR	2	-0.70498
AT1G53310.3	11	S	22.1339	22.0685	22.5545	22.612	21.7055	22.4427	22.5566	22.846	0.045475	0.250431	0.358311	AT1G53310.3;AT1G53310.2;AT1G53310.1	11;11;11	3946300	8383300	5785500	5849400	8706800	8910600	6568400	5777100	1	51.2675	3.77637e-37	147.73	122.11	51.268	1	MAS(1)IDVHLR	MAS(51)IDVHLR	2	-0.46129
AT1G53350.1	143	S	21.2142	20.109	19.9779	19.8305	16.6072	17.6254	17.9303	18.1786	-2.69753	3.22732	0.000257178	AT1G53350.1;AT5G48620.6;AT5G48620.5;AT5G48620.4;AT5G48620.3;AT5G48620.2;AT5G48620.1;AT5G43470.4;AT5G43470.3;AT5G43470.2;AT5G43470.1	143;142;142;142;142;142;142;142;142;142;142	2086000	2155500	969860	0	0	316040	265940	227350	0.999964	44.4695	6.41932e-06	97.431	16.134	77.732	1	SLS(1)LQER	S(-44)LS(44)LQER	2	0.36324
AT1G53430.2	787	S	12.546	13.6943	18.2886	12.5013	18.1779	18.497	18.3083	17.9995	3.98813	0.00598568	1.86366	AT1G53430.2;AT1G53430.1	787;828	0	0	300740	0	0	578270	345610	0	0.915138	10.7217	4.24918e-07	97.86	75.139	51.774	1	LNDDENT(0.007)HIS(0.915)T(0.078)R	LNDDENT(-21)HIS(11)T(-11)R	2	0.03225
AT1G53590.1	548	S	20.6245	19.4248	20.0763	19.5453	19.4776	20.2735	19.9564	19.3431	-0.155075	0.473361	0.177984	AT1G53590.1	548	1386100	1341500	1038300	698120	1858600	1981100	1083200	509610	0.99935	31.8712	4.10907e-40	150.09	141.9	150.09	1	KEEFLIGSIEEESQS(0.001)QS(0.999)PR	KEEFLIGS(-140)IEEES(-69)QS(-32)QS(32)PR	3	-1.2173
AT1G53590.1	483	S	19.1445	18.2359	17.2237	17.5782	18.4759	18.0447	17.4215	17.9064	-0.08345	0.363377	0.24652	AT1G53590.1	483	496910	588420	143750	178560	928230	422630	186910	188260	1	57.3483	0.00143314	57.348	33.599	57.348	1	RLDS(1)QIQR	RLDS(57)QIQR	2	0.42917
AT1G53720.2	180	S	16.4953	17.5474	17.0601	18.6185	12.6519	14.7691	15.3377	16.7574	-2.5513	1.7192	0.00837084	AT1G53720.2;AT1G53720.1	180;180	79213	0	0	367230	0	0	0	0	0.999982	47.3854	1.10113e-06	56.298	49.186	56.298	1	HTHILDDPFDDPPQLAEMMPDAS(1)PEGK	HT(-47)HILDDPFDDPPQLAEMMPDAS(47)PEGK	3	0.6459
AT1G53730.1	364	S	19.245	18.4466	18.3426	18.6143	18.832	18.6375	19.1168	19.0966	0.2586	0.072722	0.811972	AT1G53730.1;AT1G53730.2	364;364	532750	680950	0	366170	1188100	637400	605280	429580	0.940047	12.9211	0.00271058	52.784	42.15	52.784	1	LDT(0.012)S(0.048)LS(0.94)INLRPPPIDR	LDT(-19)S(-13)LS(13)INLRPPPIDR	3	0.065415
AT1G53840.1	6	S	21.0306	20.8256	20.6956	20.5914	20.4627	20.5325	20.2753	20.3739	-0.3747	2.14649	0.00311067	AT1G53840.1	6	1836700	3542200	1595000	1441600	3679100	2370700	1351200	1041200	0.99999	49.8008	1.57022e-13	117.7	81.141	117.7	1	MDSVNS(1)FK	MDS(-50)VNS(50)FK	2	0.069512
AT1G54270.2	4	S	12.5843	10.9761	12.6037	17.5633	15.9786	17.6296	17.6442	17.557	3.7705	0.00971799	1.65506	AT1G54270.2;AT1G54270.1	4;4	0	0	0	176720	0	0	218110	147770	0.999587	33.9307	0.000764549	50.563	45.779	50.563	1	AGS(1)APEGTQFDTR	AGS(34)APEGT(-34)QFDT(-51)R	2	0.17266
AT1G70320.1	1703	S	19.8138	18.4842	18.8515	18.2823	17.0728	17.2521	17.9477	18.0581	-1.27528	1.94244	0.00498686	AT1G55860.1;AT1G70320.1	1701;1703	790260	698950	444270	290900	0	0	269180	209130	0.899819	9.53526	5.41368e-09	98.796	85.117	98.796	1	VS(0.9)GS(0.1)EHGFSLNEPLGISENK	VS(9.5)GS(-9.5)EHGFS(-44)LNEPLGIS(-86)ENK	2	-0.30603
AT1G56070.3	486	S	18.5737	16.6367	18.1244	17.8618	16.6018	18.2398	18.3236	18.2526	0.0553	0.270907	0.333399	AT1G56070.3;AT1G56070.2;AT1G56070.1;AT3G12915.1	486;486;486;464	334530	0	268380	217350	0	483840	349280	239320	0.999442	32.5312	0.00190715	47.198	16.943	47.198	1	FS(0.001)VS(0.999)PVVR	FS(-33)VS(33)PVVR	2	-0.01841
AT3G12780.1	276	S	18.4861	18.2762	18.0963	18.2275	18.5615	18.3604	18.2429	18.2222	0.075225	0.133112	0.578426	AT1G56190.2;AT1G56190.1;AT3G12780.1	200;273;276	314840	605080	263210	280060	984940	526010	330280	234330	1	55.4006	0.00108151	55.401	36.158	55.401	1	RPFAAIVGGS(1)K	RPFAAIVGGS(55)K	2	-0.0007517
AT1G56290.1	305	S	15.4127	16.1977	16.0319	16.2215	15.565	16.521	16.8121	16.8912	0.481375	0.0525859	0.942943	AT1G56290.1	305	0	143260	62929	0	0	146990	122510	93141	0.827749	7.55819	0.00141784	46.706	37.118	46.706	1	NVS(0.145)VS(0.828)PVET(0.027)R	NVS(-7.6)VS(7.6)PVET(-15)R	2	0.82459
AT1G57990.1	25	S	20.8574	20.9799	20.5446	20.2638	21.389	21.2071	20.574	20.4465	0.242725	0.103215	0.674626	AT1G57990.1	25	1629000	3942100	1436500	1148800	6991600	3783800	1662000	1095000	1	162.686	0	405.76	389.99	354.04	1	QTTAEGSANPEPDQILS(1)PR	QT(-240)T(-230)AEGS(-160)ANPEPDQILS(160)PR	2	-0.12211
AT1G58025.6	59	S	17.546	22.303	18.0306	17.9226	18.9927	22.666	20.5107	19.929	1.57405	0.0688321	0.833955	AT1G58025.6;AT1G58025.1;AT1G58025.5;AT1G58025.4;AT1G58025.3;AT1G58025.2	59;59;59;59;59;59	164090	9863300	251490	226710	1328100	10402000	1590600	764910	0.999972	45.5886	1.16203e-18	121.26	109.64	121.26	1	MEVDAPS(1)PIAGSVDLADNIAAK	MEVDAPS(46)PIAGS(-46)VDLADNIAAK	2	1.0737
AT1G58025.6	415	S	19.8166	20.0891	20.1194	19.8634	19.7826	19.9516	19.8022	19.9208	-0.107825	0.876086	0.0619904	AT1G58025.6;AT1G58025.1;AT1G58025.5;AT1G58025.4;AT1G58025.3;AT1G58025.2	415;415;416;416;416;416	791760	2126000	1069800	870330	2296100	1584900	973370	760610	0.980561	17.028	5.9921e-40	157.52	134.6	119.69	1	TEIVELDS(0.981)PVS(0.019)K	T(-110)EIVELDS(17)PVS(-17)K	2	0.36559
AT1G58200.2	599	S	17.2047	14.3524	11.4222	14.9406	18.1635	19.1899	18.3115	19.1429	4.22198	0.00293749	2.17125	AT1G58200.2;AT1G58200.1	599;599	129520	0	0	0	747510	934790	346380	0	0.998301	28.5112	0.0015379	44.765	34.811	44.765	1	DEVS(0.998)DDEAT(0.001)IEQTLK	DEVS(29)DDEAT(-29)IEQT(-35)LK	2	-2.4793
AT1G58250.1	1605	S	17.6809	15.5659	17.354	16.7729	17.8033	18.1375	16.3365	16.3653	0.317225	0.17048	0.488566	AT1G58250.1;AT1G58250.2	1605;1605	180170	0	157340	102180	582330	450720	88106	64692	0.999996	56.648	0.00271114	56.648	45.818	56.648	1	STQDALIDRVPS(1)GK	S(-57)T(-57)QDALIDRVPS(57)GK	2	-0.13511
AT1G59610.1	533	S	20.4458	20.1889	19.9529	20.9793	21.1098	19.9715	19.9777	23.2503	0.6856	0.104009	0.67168	AT1G59610.1	533	1224600	2278200	953180	0	5761300	1606900	1099300	0	0.989195	19.6166	1.3489e-29	144.08	132.39	127.94	1	AT(0.011)S(0.989)PQPDGPSSTGGSLK	AT(-20)S(20)PQPDGPS(-89)S(-88)T(-88)GGS(-100)LK	2	0.14288
AT1G59710.1	204	S	24.0736	18.7419	13.7803	15.5618	18.9145	13.8418	15.4445	11.3935	-3.14083	0.827458	0.0699577	AT1G59710.1;AT1G59710.2	204;204	0	835640	0	44136	1258000	0	0	0	1	67.1875	1.35327e-28	139.6	112.2	139.6	1	QESTDSLAVGS(1)PPK	QES(-90)T(-78)DS(-67)LAVGS(67)PPK	2	-0.49004
AT1G59820.1	6	S	17.1296	16.9129	16.5161	17.759	17.0387	16.9194	16.7308	16.8201	-0.20215	0.620502	0.118961	AT1G59820.1	6	122950	235200	88028	0	342770	193740	115800	88666	0.868083	8.28511	0.000895391	49.929	37.051	49.929	1	S(0.129)GS(0.868)FS(0.003)VDSSATHQR	S(-8.3)GS(8.3)FS(-25)VDS(-43)S(-47)AT(-47)HQR	2	0.96809
AT1G59900.2	292	S	26.3696	25.3669	25.0515	25.1277	25.2481	25.0924	25.0126	25.0067	-0.388975	0.893435	0.0593889	AT1G59900.2;AT1G59900.1;AT1G24180.1	292;292;296	74346000	82475000	32660000	33452000	101460000	55914000	36040000	25832000	0.999659	34.6816	8.50024e-76	181.77	154.36	142.85	1	YHGHS(1)MSDPGSTYR	Y(-86)HGHS(35)MS(-35)DPGS(-64)T(-64)Y(-81)R	2	-0.2177
AT1G60140.3	5	S	19.294	17.7864	19.2704	18.4028	18.0885	17.6857	18.3102	18.6068	-0.5156	0.887797	0.0602212	AT1G60140.3;AT1G60140.6;AT1G60140.5;AT1G60140.4;AT1G60140.2;AT1G60140.1	5;5;5;5;5;5	0	430890	593920	316230	709600	329530	346050	0	1	90.4728	1.30526e-25	130	120.25	130	1	S(1)FGNLLDLASGDLLDIPQTPR	S(90)FGNLLDLAS(-90)GDLLDIPQT(-130)PR	2	0.13017
AT1G60200.4	448	S	21.9894	21.2934	21.4525	21.2817	19.8918	20.9469	20.9155	20.9102	-0.83815	1.76646	0.00749994	AT1G60200.4;AT1G60200.3;AT1G60200.2;AT1G60200.1	448;448;448;597	0	4898800	2695400	2326200	0	3159400	2105900	1510000	0.978221	16.5246	1.68431e-45	150.14	139.74	150.14	1	ILSGQAAIGSETVQT(0.022)S(0.978)PIENDHK	ILS(-99)GQAAIGS(-60)ET(-57)VQT(-17)S(17)PIENDHK	3	0.12259
AT1G60890.1	241	S	20.1511	18.7605	19.0089	18.6344	19.3599	19.9384	19.6606	18.9193	0.330825	0.11063	0.648053	AT1G60890.1;AT1G60890.2	241;253	998350	846450	495480	371300	1713000	1570500	882410	379890	0.999133	30.7215	3.5888e-14	118.37	97.51	99.531	1	S(0.001)LS(0.999)ELTTTSGLTR	S(-31)LS(31)ELT(-47)T(-64)T(-72)S(-79)GLT(-86)R	2	1.7315
AT1G61210.3	490	S	17.4153	17.29	17.6078	17.6278	16.9481	17.3106	16.9348	17.0382	-0.4273	2.24114	0.0024996	AT1G61210.3;AT1G61210.2;AT1G61210.1	490;490;492	149880	305450	187610	184810	321920	254090	133390	103130	0.907331	9.90829	0.00100898	46.3	23.421	46.3	1	FEQALLPES(0.907)PT(0.093)DEAK	FEQALLPES(9.9)PT(-9.9)DEAK	2	3.0424
AT1G61690.1	251	S	17.7386	17.4065	17.5319	17.2709	17.5313	16.9014	17.0731	17.237	-0.301275	1.21823	0.0271037	AT1G61690.1	251	187520	331150	177990	144300	482270	191330	146810	118370	1	56.3592	0.000271764	56.359	38.55	56.359	1	ELGWS(1)DDEDK	ELGWS(56)DDEDK	2	-0.10729
AT1G61730.1	49	S	13.3163	18.468	14.1387	14.3639	16.9033	17.6309	17.8007	18.2615	2.57737	0.0161821	1.43682	AT1G61730.1	49	0	691110	0	0	0	317240	243090	0	0.991703	20.7753	1.33429e-40	158.58	133.72	152.47	1	S(0.992)PS(0.008)ATTAAAPPAK	S(21)PS(-21)AT(-58)T(-76)AAAPPAK	2	0.35593
AT1G62630.1	704	S	18.0425	20.0614	19.5823	19.41	20.0165	19.9972	20.1399	19.621	0.6696	0.0421615	1.03378	AT1G62630.1	704	231500	2085500	737250	635650	2700300	1635800	1230100	617860	0.999983	47.7759	3.16129e-25	134.24	119.1	134.24	1	LLQIFGSNIFS(1)PDR	LLQIFGS(-48)NIFS(48)PDR	2	-0.28301
AT1G63010.2	484	S	19.4598	18.2523	19.587	19.4776	13.5809	13.7937	13.0108	17.9093	-4.6205	2.42765	0.00162513	AT1G63010.2;AT1G63010.7;AT1G63010.6;AT1G63010.4;AT1G63010.3;AT1G63010.1;AT1G63010.5	484;486;486;486;486;486;495	618310	0	739670	0	0	0	0	188640	0.938532	13.1325	9.21843e-10	73.492	63.07	63.63	1	LPLLIT(0.003)S(0.046)GIKPEDEEECDES(0.939)EES(0.013)PEDSHK	LPLLIT(-25)S(-13)GIKPEDEEECDES(13)EES(-19)PEDS(-34)HK	3	-0.4946
AT1G63680.3	194	S	18.9292	22.8657	18.8429	19.4001	22.8232	22.4732	22.2077	21.9862	2.3631	0.0114179	1.58589	AT1G63680.3;AT1G63680.2;AT1G63680.1	194;194;194	428030	14568000	441630	631270	18894000	9100800	5157300	3183400	1	73.4016	1.61055e-278	283.83	252.86	283.83	1	LTGLTEIS(1)DEEDWVDEEGNTR	LT(-130)GLT(-73)EIS(73)DEEDWVDEEGNT(-160)R	2	-0.18058
AT1G63850.1	130	S	17.5075	11.3271	13.3608	14.4899	17.5496	16.8343	16.4517	16.6278	2.69453	0.0190667	1.36701	AT1G63850.1	130	159770	0	0	0	488430	182640	95428	77601	0.99997	48.2043	0.00022209	57.159	47.101	57.159	1	S(1)PGNQFNDPNSSDVK	S(48)PGNQFNDPNS(-48)S(-48)DVK	2	-1.3421
AT1G64500.1	115	S	21.672	21.5414	22.1224	21.6357	21.0268	21.514	21.4009	21.1353	-0.473625	1.7805	0.00725964	AT1G64500.1	115	2865000	5817500	4288200	2973100	5439400	4680900	2948100	1765000	0.998458	28.1133	2.09285e-170	243.88	215.6	200.21	1	S(0.002)AS(0.998)FHTLDELEVR	S(-28)AS(28)FHT(-75)LDELEVR	2	0.40774
AT1G64650.2	403	S	19.8152	18.92	18.6496	17.5094	19.1616	17.4122	17.399	17.3787	-0.885675	0.956626	0.0508555	AT1G64650.2;AT1G64650.1	403;444	791010	945400	0	170250	1493000	272630	184010	130590	0.982177	17.4191	2.59448e-30	146.79	106.87	146.79	1	S(0.018)RS(0.982)QEWSAEK	S(-17)RS(17)QEWS(-45)AEK	2	0.65474
AT1G64790.1	1801	S	22.1981	22.3588	22.3304	22.132	22.2353	22.2617	22.0139	22.004	-0.1261	0.997566	0.0460288	AT1G64790.1;AT1G64790.3;AT1G64790.2	1801;1872;1887	4125700	10252000	4953100	4193900	12570000	7859500	4509000	3223000	1	137.643	0	324.45	311.02	310.98	1	ALLEGGS(1)DDEGASTEAQGR	ALLEGGS(140)DDEGAS(-140)T(-160)EAQGR	2	-0.12117
AT1G65320.1	337	S	21.3956	20.3436	20.3782	20.6533	19.9109	10.7454	12.8622	13.326	-6.48155	2.05716	0.00382425	AT1G65320.1	337	0	2536200	1280000	0	2509700	0	0	0	0.78354	7.49134	3.59973e-08	98.105	85.052	98.105	1	SIGFNPT(0.14)S(0.784)PT(0.077)R	S(-84)IGFNPT(-7.5)S(7.5)PT(-10)R	2	-0.077454
AT1G66680.1	35	S	18.6422	18.5975	18.8593	18.9786	18.9018	18.5338	18.9162	19.0744	0.08715	0.146248	0.543768	AT1G66680.1	35	350810	756060	446680	471360	1247000	593180	526710	423020	0.999794	36.9352	4.05127e-41	157.42	138.8	138.08	1	AAAAVTTTTTDSLAS(1)DDDR	AAAAVT(-88)T(-82)T(-77)T(-63)T(-55)DS(-37)LAS(37)DDDR	2	0.64763
AT1G66940.1	321	S	18.5669	18.269	18.2764	17.8721	17.7112	18.4852	18.4233	18.075	-0.072425	0.419012	0.208348	AT1G66940.1;AT1G66940.4	321;350	332960	602070	298200	218910	0	573560	374270	211590	0.819948	7.35066	1.42409e-05	76.704	68.992	69.152	1	SSDALEVPPRPIKES(0.82)PT(0.151)LS(0.029)EDIK	S(-56)S(-56)DALEVPPRPIKES(7.4)PT(-7.4)LS(-14)EDIK	3	0.078433
AT1G67090.1	113	S	17.2797	18.74	20.2596	17.8043	19.3418	17.821	18.3106	20.9532	0.58575	0.142961	0.552089	AT1G67090.1	113	136430	834500	0	0	1691700	361920	0	0	1	73.1013	1.37587e-48	141.73	100.04	141.73	1	EHGNS(1)PGYYDGR	EHGNS(73)PGY(-73)Y(-78)DGR	2	1.8061
AT1G67090.1	79	S	19.5038	23.2911	19.7724	22.3835	23.4442	22.4468	23.0249	22.4975	1.61565	0.0333341	1.13145	AT1G67090.1;AT1G67090.2	79;79	637420	19564000	841130	4992400	29058000	8935800	9086700	4537600	0.999052	30.2288	0	298.1	255.89	130.27	1	FETLSYLPDLT(0.001)DS(0.999)ELAK	FET(-89)LS(-68)Y(-80)LPDLT(-30)DS(30)ELAK	2	-0.41269
AT1G67120.1	5048	S	18.7399	17.796	18.868	18.5997	18.3526	17.2097	17.7043	20.0224	-0.17865	0.400471	0.22017	AT1G67120.1;AT1G67120.2	5048;5055	375390	433780	0	0	852170	236920	227390	0	0.981536	17.4026	0.00161914	42.338	33.737	41.202	1	T(0.018)HQENS(0.982)PIHNFGDGNS(0.001)R	T(-17)HQENS(17)PIHNFGDGNS(-32)R	3	-0.16265
AT1G67140.1	2065	S	17.8462	18.2496	17.165	17.8499	18.7976	18.8681	19.296	20.7094	1.6401	0.00361224	2.08181	AT1G67140.1;AT1G67140.3;AT1G67140.2	2065;2066;2066	202050	594040	0	215560	1160100	747870	0	0	0.97762	20.5695	5.15496e-10	76.198	69.694	76.198	1	S(0.009)S(0.009)IQDDES(0.978)NAEET(0.005)DDQHLASDHATDITR	S(-21)S(-21)IQDDES(21)NAEET(-23)DDQHLAS(-51)DHAT(-67)DIT(-70)R	3	0.13375
AT1G67140.1	2046	S	18.6134	18.8623	19.1037	18.7853	18.065	17.5768	17.6751	17.6513	-1.09913	3.78835	7.07958e-05	AT1G67140.1;AT1G67140.3;AT1G67140.2	2046;2047;2047	343870	908370	529110	412260	698140	305570	222830	157750	0.915045	10.3226	0.000174149	71.016	55.445	68.809	1	T(0.085)ES(0.915)VAEEEPDLPGR	T(-10)ES(10)VAEEEPDLPGR	2	-0.26038
AT1G67230.1	883	S	19.1833	19.369	19.5397	19.51	18.951	19.1326	19.0133	19.1846	-0.330125	2.13342	0.00320604	AT1G67230.1	883	510460	1290600	715810	681270	1290200	898360	563370	456580	0.992355	21.133	1.4335e-30	139.9	129	129.11	1	AQEVAADS(0.992)LS(0.008)NLDVDGQSR	AQEVAADS(21)LS(-21)NLDVDGQS(-61)R	2	-0.18987
AT1G67230.1	885	S	18.7436	19.1962	19.2932	18.9783	19.0908	19.4212	19.2814	19.3354	0.229375	0.0349644	1.11152	AT1G67230.1	885	376340	1144900	603400	471240	1421500	1097300	678460	506910	0.998244	27.6456	6.41135e-43	158.65	147.59	136.2	1	AQEVAADS(0.002)LS(0.998)NLDVDGQSR	AQEVAADS(-28)LS(28)NLDVDGQS(-44)R	2	0.27579
AT1G67230.1	774	S	17.0816	18.2159	18.5066	22.0585	18.3465	19.4301	19.3283	19.9522	0.298625	0.221801	0.398012	AT1G67230.1	774	118930	580340	349790	0	848580	1104100	700850	0	0.985551	18.3383	3.60294e-06	87.932	74.952	87.932	1	DIS(0.986)PT(0.014)AAGLGLPVTGGK	DIS(18)PT(-18)AAGLGLPVT(-77)GGK	2	-0.076518
AT1G67230.1	865	S	18.5811	18.8846	18.847	18.2752	18.4815	18.5892	18.1868	18.1356	-0.2987	1.13378	0.033149	AT1G67230.1	865	336250	922490	442870	289460	931790	616430	317700	220670	0.999946	43.3024	5.12369e-52	164.57	144.73	164.57	1	EVEVTNVNS(1)DGDQSDINSK	EVEVT(-51)NVNS(43)DGDQS(-43)DINS(-69)K	2	0.49704
AT1G67230.1	1001	S	17.1462	17.1875	16.9593	16.4152	16.6449	16.2222	16.5069	16.5163	-0.454475	1.50641	0.0137475	AT1G67230.1	1001	124370	284510	119680	79740	260900	119490	99152	71828	1	53.6827	0.000708872	53.683	42.193	53.683	1	VAS(1)EQQGEVVGQR	VAS(54)EQQGEVVGQR	2	-0.073643
AT1G67580.2	152	S	17.9877	17.6104	18.3453	18.156	16.9723	17.6736	18.3674	18.3422	-0.185975	0.502281	0.164038	AT1G67580.2;AT1G67580.1	152;152	222870	381410	312780	0	0	326770	360050	254650	1	42.7433	0.00572669	42.743	30.116	42.743	1	KFS(1)PIVWDR	KFS(43)PIVWDR	2	0.27765
AT1G67580.2	728	S	17.8369	16.7225	17.7515	17.634	18.1912	18.0766	17.6115	17.6326	0.39175	0.054759	0.926421	AT1G67580.2;AT1G67580.1	728;728	0	0	207250	185600	761970	0	0	155720	1	85.9581	7.23958e-05	85.958	73.002	85.958	1	S(1)PDPLEEQR	S(86)PDPLEEQR	2	-0.21884
AT1G67900.6	384	S	16.5597	16.9312	17.6536	16.8438	16.6206	16.877	17.2755	17.595	0.09495	0.212722	0.412	AT1G67900.6;AT1G67900.5;AT1G67900.4;AT1G67900.3;AT1G67900.2;AT1G67900.1	384;384;384;384;384;384	82827	238190	193650	107330	256540	188130	168920	151710	1	91.4197	1.10039e-06	97.953	60.797	97.953	1	S(1)AENIDLEFQESR	S(91)AENIDLEFQES(-91)R	2	-1.0605
AT1G67910.2	70	S	17.9815	18.9705	20.041	19.2407	18.7955	19.3424	19.3314	18.8346	0.01755	0.28828	0.314166	AT1G67910.2;AT1G67910.1	70;70	221910	979110	1013200	565260	1158400	1039000	702360	358230	1	64.2104	8.47789e-07	98.942	80.317	96.734	1	S(1)IEAASLLDSPPK	S(64)IEAAS(-64)LLDS(-89)PPK	2	0.3311
AT1G67950.4	207	S	19.9249	20.3865	20.7328	20.3569	19.4399	19.5752	19.6266	19.7159	-0.760875	2.61384	0.00105793	AT1G67950.4;AT1G67950.1;AT1G67950.3;AT1G67950.2	207;266;267;267	853500	2612700	1636700	1225300	1810700	1220900	861820	659870	0.992999	21.5188	5.55857e-23	134.99	114.09	97.214	1	EIITLDPS(0.007)S(0.993)PK	EIIT(-57)LDPS(-22)S(22)PK	2	0.18616
AT1G68020.1	5	S	17.1205	20.1274	18.3057	19.9137	20.5445	20.5207	20.6171	19.9337	1.53718	0.0175049	1.40335	AT1G68020.1;AT1G68020.3;AT1G68020.2	5;5;5	122180	2183100	0	901210	3893600	2351300	1712400	767440	0.998583	28.4794	3.70477e-93	194.37	176.46	194.37	1	S(0.999)YS(0.001)NLLELASGDSPTFGR	S(28)Y(-89)S(-28)NLLELAS(-170)GDS(-180)PT(-190)FGR	2	-0.34274
AT1G68060.1	475	S	20.0629	19.5018	20.4433	20.4231	19.456	19.6407	18.4225	19.5158	-0.849025	1.56045	0.0121166	AT1G68060.1	475	939170	1415000	0	0	1831000	0	0	574440	0.999998	57.6613	4.29922e-09	107.79	90.402	107.79	1	GPGNYS(1)FNK	GPGNY(-58)S(58)FNK	2	0.15518
AT1G68060.1	49	S	17.0398	18.6002	17.0676	17.5795	19.0027	19.0196	19.1084	20.8316	1.9188	0.00347257	2.09884	AT1G68060.1	49	115530	757460	129010	0	1337300	0	601780	0	0.993471	22.1386	0.000262802	42.59	33.046	42.59	1	RPVRPS(0.993)FDAAADNEFIT(0.006)LLHGSDPVK	RPVRPS(22)FDAAADNEFIT(-22)LLHGS(-33)DPVK	4	-0.10759
AT1G68670.1	327	S	16.7512	16.9108	17.3364	17.2859	17.8386	17.853	16.1672	17.6875	0.3155	0.122958	0.608056	AT1G68670.1	327	94588	234850	0	0	596740	370050	0	161760	0.999875	39.0256	0.00258326	42.789	34.484	42.789	1	GGVYAPVAVAQS(1)PK	GGVY(-39)APVAVAQS(39)PK	2	1.0359
AT1G68790.1	843	S	18.5431	18.8905	20.7008	18.9174	18.6624	18.9759	18.1099	18.8756	-0.607	0.837767	0.0681807	AT1G68790.1	843	327510	926310	0	451770	1056300	805930	0	368560	0.980328	16.9752	0.00163421	67.275	25.631	59.185	1	IQEGPEGS(0.98)LQS(0.02)EMK	IQEGPEGS(17)LQS(-17)EMK	2	1.8495
AT1G68790.1	1037	S	17.9613	17.8864	18.5756	18.2365	17.5801	17.4807	18.1407	18.0046	-0.363425	1.10915	0.0351641	AT1G68790.1	1037	218820	461840	366920	281800	498850	285880	307710	201520	1	76.8502	2.2743e-07	96.993	78.536	76.85	1	NPVEDPQLEVGGS(1)GEIR	NPVEDPQLEVGGS(77)GEIR	2	0.51647
AT1G69030.1	304	S	18.4594	18.345	18.5868	18.3198	19.2402	17.4726	18.1971	18.0872	-0.178475	0.489287	0.170134	AT1G69030.1	304	0	634630	369790	298550	1576600	284270	319970	213400	1	55.4006	5.85644e-40	151.16	100.1	55.401	1	IGNS(1)DVEEEK	IGNS(55)DVEEEK	2	0.60851
AT1G69040.1	440	S	18.0671	19.1988	17.3076	19.1805	13.1693	13.441	13.038	12.5926	-5.37828	4.75246	7.81737e-06	AT1G69040.1;AT1G69040.2	440;444	235480	1147000	0	0	0	0	0	0	1	45.161	0.00057094	54.982	42.405	45.161	1	S(1)FVNFGLVR	S(45)FVNFGLVR	2	-0.24617
AT1G69200.1	131	S	17.6765	17.2272	17.0188	16.8282	18.0824	17.257	17.8655	17.2771	0.432825	0.0384256	1.07224	AT1G69200.1	131	179620	292440	124720	106170	706620	244810	254270	121710	0.85952	7.86643	0.000297814	61.435	48.035	61.435	1	AAAAS(0.14)S(0.86)DVEEVK	AAAAS(-7.9)S(7.9)DVEEVK	2	0.12261
AT1G69340.2	318	S	18.2948	20.5891	17.8429	19.5563	20.3603	21.8595	21.3622	21.5965	2.22385	0.0042626	2.01023	AT1G69340.2;AT1G69340.1	318;318	275730	3006500	220810	703480	3426900	5947500	0	0	0.9997	35.8192	0.000135181	64.152	54.988	64.152	1	RNS(1)NHLDSYLDPAFMSLIK	RNS(36)NHLDS(-36)Y(-44)LDPAFMS(-61)LIK	3	-0.32618
AT1G69410.1	2	S	19.2043	19.2899	18.8837	18.6123	16.9924	16.4246	17.0171	17.1894	-2.09167	4.33033	2.04123e-05	AT1G69410.1	2	517940	1221700	454290	365660	331940	137490	141220	114530	0.999999	63.8735	3.81287e-07	98.694	86.117	98.694	1	S(1)DDEHHFESSDAGASK	S(64)DDEHHFES(-64)S(-64)DAGAS(-95)K	2	-0.43947
AT1G69510.3	56	S	17.9771	19.69	19.5408	19.3863	19.4223	19.8919	20.1959	19.5235	0.60985	0.0479237	0.980975	AT1G69510.3;AT1G69510.2;AT1G69510.1	56;56;56	221230	1612200	716370	625270	1788700	1520600	1278800	577500	1	85.845	7.7896e-07	94.191	78.054	85.845	1	AFFDS(1)ADWALGK	AFFDS(86)ADWALGK	2	-0.086713
AT1G69870.1	38	S	17.679	16.5492	17.6368	17.4711	17.5262	17.704	17.7589	17.7188	0.34295	0.0583962	0.900271	AT1G69870.1	38	179930	0	191420	165780	480580	0	236160	165300	0.835895	7.25843	0.00134434	48.659	32.127	48.659	1	IS(0.157)S(0.836)PGS(0.007)ILDAEK	IS(-7.3)S(7.3)PGS(-21)ILDAEK	2	-0.037169
AT1G70100.5	99	S	20.7853	20.6646	20.0686	19.9672	17.7515	19.6128	19.7097	19.4368	-1.24373	1.60774	0.0108506	AT1G70100.5;AT1G70100.2;AT1G70100.1;AT1G70100.4;AT1G70100.6;AT1G70100.3	99;99;99;99;99;99	1549600	3168200	1032800	935310	0	1253200	912950	543830	1	47.559	1.83551e-11	113.22	81.627	47.559	1	NAS(1)FRPNIQNR	NAS(48)FRPNIQNR	2	0.76926
AT1G70180.6	26	S	17.3891	17.0163	17.4318	17.3423	17.5767	14.6113	17.1163	17.5019	-0.593325	0.66199	0.106669	AT1G70180.6;AT1G70180.5;AT1G70180.3;AT1G70180.4;AT1G70180.1;AT1G70180.2	26;26;26;26;26;26	147180	252670	166060	151620	497680	0	0	142230	0.999973	45.6077	0.000147783	72.937	50.058	72.937	1	AAS(1)DIDDGYELPR	AAS(46)DIDDGY(-46)ELPR	2	0.22213
AT1G70320.1	2333	S	14.3798	10.7038	14.2725	13.4543	16.2953	17.467	18.5952	17.4683	4.25385	0.00105009	2.61707	AT1G70320.1	2333	0	0	0	0	0	283170	421640	138950	0.829955	7.41082	0.000396249	41.209	34.549	41.209	1	HS(0.006)EAGS(0.006)Y(0.006)DVAQFY(0.151)MFDS(0.83)PVLPFDQVPVDPFS(0.001)DR	HS(-21)EAGS(-21)Y(-21)DVAQFY(-7.4)MFDS(7.4)PVLPFDQVPVDPFS(-32)DR	3	-0.4012
AT1G70320.1	2582	S	17.2001	21.2848	20.0499	19.6728	21.3775	20.8306	22.6403	19.0949	1.43392	0.0582308	0.901422	AT1G70320.1	2582	129110	4869700	1019500	762620	6936300	2914800	0	429060	1	49.9289	4.43428e-19	101.86	92.289	49.929	1	NDEQVDEGS(1)LDGR	NDEQVDEGS(50)LDGR	2	-0.61171
AT1G70770.2	87	S	23.3201	23.2804	22.3219	21.9516	22.9061	22.6195	22.0778	21.9518	-0.3297	0.644443	0.111683	AT1G70770.2;AT1G70770.1	87;87	8979800	19419000	4924000	3701000	20011000	10072000	4713200	3108400	1	134.969	2.6138e-169	241.51	211.71	174.39	1	MTAIDS(1)DDDGVVR	MT(-130)AIDS(130)DDDGVVR	2	-0.20496
AT1G70770.2	112	S	16.8031	18.1101	18.5366	18.2242	20.1497	15.8583	18.4781	17.3845	0.04915	0.284713	0.317984	AT1G70770.2;AT1G70770.1	112;112	98052	539280	0	279420	2961400	0	388780	131110	0.999586	37.843	4.77302e-09	93.684	80.703	93.684	1	SNGYGDDGYDFDGS(1)DDEIATLK	S(-54)NGY(-38)GDDGY(-38)DFDGS(38)DDEIAT(-41)LK	2	-0.78439
AT1G70940.1	427	S	19.6161	19.5022	18.9456	19.3047	13.6527	13.9536	14.4206	13.6308	-5.42773	6.65949	0	AT1G70940.1	427	0	1415400	0	590910	0	0	0	0	0.999761	36.2216	0.000440995	50.531	44.871	50.531	1	AVAHPASGDFGGEQQFS(1)FAGK	AVAHPAS(-36)GDFGGEQQFS(36)FAGK	3	0.5204
AT1G70940.1	174	S	17.6297	20.8352	23.5699	18.6415	20.0776	20.1344	22.3466	17.6071	-0.12765	0.327776	0.275836	AT1G70940.1	174	173890	3565900	0	0	2817100	1799000	0	152990	0.973973	16.4017	1.52613e-06	85.619	63.086	61.732	1	MLIMEQFPET(0.004)AAS(0.022)IVS(0.974)FK	MLIMEQFPET(-24)AAS(-16)IVS(16)FK	2	-1.1591
AT1G71010.1	1184	S	14.6293	12.3667	18.2165	13.2435	18.1875	18.179	17.9541	18.1262	3.4977	0.00765727	1.75752	AT1G71010.1	1184	0	0	286070	0	760040	0	270360	219240	0.998998	29.9887	0.000227951	67.726	38.999	50.292	1	VQS(0.999)FDS(0.001)AIR	VQS(30)FDS(-30)AIR	2	-0.90477
AT1G71080.1	183	S	19.0473	19.355	18.7524	19.4437	15.1903	14.2287	10.797	13.5794	-5.70075	3.30058	0.000217636	AT1G71080.1	183	464540	1278100	0	0	0	0	0	0	0.815661	6.46685	1.21567e-06	56.728	46.58	56.728	1	IEIGKPENSAEPANTGNVPAT(0.184)S(0.816)PVEDK	IEIGKPENS(-49)AEPANT(-34)GNVPAT(-6.5)S(6.5)PVEDK	3	-0.65302
AT1G71710.2	282	S	21.743	20.9898	21.7555	22.1663	20.7914	20.382	21.7778	21.2959	-0.601875	1.0615	0.0394317	AT1G71710.2;AT1G71710.1	282;291	3009500	3969200	0	0	4620500	2135800	0	0	1	40.0015	0.00655489	52.716	8.608	40.002	1	RQFS(1)IPK	RQFS(40)IPK	2	0.76345
AT1G72150.1	45	S	17.5834	17.0708	17.1554	16.9961	17.8811	17.1442	16.852	20.6297	0.925325	0.0781622	0.783283	AT1G72150.1	45	0	262400	137110	119280	614600	226410	125950	0	1	114.721	1.46917e-15	114.72	105.13	114.72	1	EEVAAPVS(1)DEK	EEVAAPVS(110)DEK	2	-1.2556
AT1G72160.1	18	S	12.7823	13.4363	12.0106	20.9084	22.0882	18.2996	21.6515	21.4262	6.08197	0.00759716	1.76094	AT1G72160.1	18	0	0	0	1795900	11352000	504300	3507500	2159400	0.875796	8.49509	7.47353e-65	164.05	153.72	164.05	1	LPS(0.876)PS(0.124)LTPSEVSESTQDALPTETETLEK	LPS(8.5)PS(-8.5)LT(-34)PS(-50)EVS(-72)ES(-110)T(-120)QDALPT(-160)ET(-160)ET(-160)LEK	3	0.23986
AT1G72160.1	108	S	24.1471	24.3868	24.4782	24.2487	24.2879	24.6573	24.2911	24.3887	0.09105	0.111714	0.644338	AT1G72160.1	108	15930000	41810000	21950000	18189000	52147000	41358000	21856000	16831000	1	166.125	2.31548e-78	191.23	183.4	175.48	1	SMIPQNLGS(1)FK	S(-170)MIPQNLGS(170)FK	2	-0.43276
AT1G72340.3	7	S	21.7121	21.8316	22.0881	21.7142	21.7749	21.9276	21.6584	21.9218	-0.015825	0.351674	0.25568	AT1G72340.3;AT1G72340.1;AT1G72340.2	7;7;34	2945700	7113800	4187300	3139300	9135600	6234900	3524100	3044500	0.999978	46.619	3.73018e-64	170	118.73	164.48	1	RSPS(1)FILDER	RS(-47)PS(47)FILDER	2	-0.11723
AT1G72410.2	649	S	18.7665	19.4189	19.7282	19.024	18.9366	19.3741	19.202	19.0924	-0.083125	0.436603	0.197862	AT1G72410.2;AT1G72410.1	649;649	382370	1336000	815710	486410	1277400	1062100	642110	428320	0.999998	58.3025	5.11187e-10	108.59	92.062	108.59	1	NLS(1)DLSLTDDSK	NLS(58)DLS(-58)LT(-74)DDS(-94)K	2	0.26202
AT1G72410.2	477	S	13.8878	12.4961	18.0507	13.5909	18.1783	17.7694	18.2	18.2361	3.58958	0.00571981	1.88327	AT1G72410.2;AT1G72410.1	477;477	0	0	255010	0	755200	0	320620	236590	0.977677	16.4512	0.00203275	45.257	38.362	45.257	1	S(0.022)QS(0.978)AHIEASFK	S(-16)QS(16)AHIEAS(-37)FK	2	0.21102
AT1G72416.1	58	S	16.9933	16.4621	17.5038	16.9949	13.104	12.0548	13.9084	13.0961	-3.9477	4.2969	2.17153e-05	AT1G72416.1;AT1G72416.4;AT1G72416.2;AT1G72416.3	58;58;58;58	111870	172080	0	0	0	0	0	0	0.999931	42.8059	7.14989e-08	93.258	74.99	93.258	1	AYS(1)VLSDSNK	AY(-48)S(43)VLS(-43)DS(-61)NK	2	0.59847
AT1G72430.1	19	S	19.3193	18.8448	18.6336	18.642	17.1305	19.1107	19.203	19.2381	-0.18935	0.433429	0.199704	AT1G72430.1	19	0	897390	381970	373260	0	884860	642560	473850	1	50.0403	0.00763832	50.04	39.903	50.04	1	KWPS(1)FAK	KWPS(50)FAK	2	0.17016
AT1G72640.4	84	S	17.4984	17.5161	17.2246	16.8649	18.156	17.6256	17.7819	17.2985	0.4395	0.0245323	1.26025	AT1G72640.4;AT1G72640.3;AT1G72640.2	84;84;84	158760	357270	143840	108910	743600	316080	239950	123530	0.998824	29.2917	1.69978e-05	87.363	69.554	87.363	1	DGS(0.001)LS(0.999)GDDDEFEEEK	DGS(-29)LS(29)GDDDEFEEEK	2	-0.073782
AT1G72930.1	53	S	17.5195	17.9335	17.6461	17.4994	17.6985	17.7375	17.2899	17.4243	-0.112075	0.624051	0.117849	AT1G72930.1;AT1G72930.2	53;53	161100	477160	0	169070	541530	341570	170610	134780	1	40.1131	0.0273353	41.052	19.179	40.113	1	ELENGQRFS(1)PELK	ELENGQRFS(40)PELK	2	-0.29652
AT1G73020.3	645	S	17.3377	12.6028	12.3264	14.1287	17.0933	19.2125	18.197	18.2142	4.08035	0.00348658	2.09711	AT1G73020.3;AT1G73020.2;AT1G73020.1	645;645;645	142030	0	0	0	0	949510	319940	233030	0.996199	24.2884	0.000294856	58.674	35.757	58.674	1	S(0.004)IS(0.996)GEFNSLTK	S(-24)IS(24)GEFNS(-44)LT(-43)K	2	-0.0028337
AT1G73170.4	273	S	18.0168	18.5881	18.8626	17.6976	20.7655	19.2645	19.5529	18.316	1.18345	0.0184614	1.38072	AT1G73170.4;AT1G73170.2;AT1G73170.1;AT1G73170.3	273;419;547;547	227410	751110	0	0	4538300	984370	818950	0	0.999999	60.0248	9.808e-06	80.224	60.686	80.224	1	ALLTDYEDGLGEFGS(1)EDRLK	ALLT(-60)DY(-65)EDGLGEFGS(60)EDRLK	3	0.264
AT1G73600.2	11	S	17.4524	16.5719	17.4869	17.4123	15.6244	17.0078	16.9753	17.0472	-0.5672	0.965436	0.0497734	AT1G73600.2	11	0	0	172520	159160	0	205980	137190	103780	0.94475	15.97	0.00010913	67.275	54.139	48.704	1	AHS(0.004)HT(0.024)NGAIS(0.945)PS(0.024)FS(0.003)K	AHS(-24)HT(-16)NGAIS(16)PS(-16)FS(-24)K	2	-0.29222
AT1G73660.1	492	S	17.2113	17.2244	17.3758	16.9575	15.7352	17.5	17.2141	17.0967	-0.30575	0.623242	0.118101	AT1G73660.1	492	130110	291870	159740	116130	0	289730	161880	107400	0.915135	10.3551	0.000127659	69.108	55.391	69.108	1	S(0.084)PS(0.915)WT(0.001)EGVSSPAAQR	S(-10)PS(10)WT(-32)EGVS(-57)S(-61)PAAQR	2	-0.70019
AT1G73670.1	511	S	17.5376	17.8145	18.4816	17.9351	12.8449	14.3195	13.185	15.826	-3.89835	3.1451	0.000311066	AT1G73670.1	511	163140	439380	0	228680	0	0	0	0	0.836753	7.78786	0.000165476	71.548	46.162	71.548	1	TTAAVAS(0.024)T(0.139)LDS(0.837)PK	T(-64)T(-64)AAVAS(-15)T(-7.8)LDS(7.8)PK	2	-0.75833
AT1G73980.3	10	S	19.3526	19.6563	20.4706	19.8706	19.2369	19.5394	19.4623	19.5695	-0.3855	1.06807	0.038813	AT1G73980.3;AT1G73980.2;AT1G73980.1	10;10;10	574020	1575000	1364700	874710	1573000	1191000	769090	596220	0.999992	51.1809	2.78318e-30	136.24	107.54	110.38	1	ALDSSVALS(1)PR	ALDS(-65)S(-51)VALS(51)PR	2	-0.16035
AT1G73980.3	490	S	19.4893	20.6538	19.0602	20.5385	13.7457	11.5547	12.8102	20.6136	-5.2544	1.65916	0.00962562	AT1G73980.3;AT1G73980.2;AT1G73980.1	490;490;490	631070	3144400	0	1389700	0	0	0	1229400	0.903065	9.70984	2.07987e-12	90.869	77.681	87.155	1	APAS(0.903)PAT(0.097)LPNQGFITQLSDQISTLNER	APAS(9.7)PAT(-9.7)LPNQGFIT(-34)QLS(-57)DQIS(-76)T(-76)LNER	3	0.70211
AT1G73980.3	437	S	19.9509	19.9015	19.3389	19.7809	20.2883	19.856	21.5258	22.2635	1.24035	0.0161577	1.43745	AT1G73980.3;AT1G73980.2;AT1G73980.1	437;437;437	0	1866700	0	821980	3260200	1483300	0	0	0.973581	15.6662	4.86867e-41	158.58	139.48	158.58	1	LSLDDDTVS(0.026)S(0.974)PK	LS(-140)LDDDT(-50)VS(-16)S(16)PK	2	0.43361
AT1G74250.1	292	S	19.4637	17.9349	18.3101	18.4011	16.3671	17.93	18.5166	17.8117	-0.8711	1.06493	0.039108	AT1G74250.1	292	0	477620	305240	315870	0	390340	399300	176300	1	41.9124	0.000339893	48.229	41.354	41.912	1	AHEGEDEGAGLS(1)ELEEEDDDAK	AHEGEDEGAGLS(42)ELEEEDDDAK	3	0.21501
AT1G74690.1	79	S	22.3226	22.9654	24.335	21.1558	21.9645	24.0053	23.7049	23.6868	0.645675	0.112197	0.642696	AT1G74690.1	79	4497700	15610000	0	2131800	10419000	26320000	14559000	10347000	1	73.8851	5.21567e-15	104.84	94.232	104.84	1	SGGMLETQNVGPEEIS(1)DDEIELPEGK	S(-81)GGMLET(-74)QNVGPEEIS(74)DDEIELPEGK	3	-3.3489
AT1G74690.1	356	S	22.0372	22.149	22.3988	22.14	22.1166	22.2234	21.8958	21.9579	-0.132825	0.884489	0.0607154	AT1G74690.1	356	3690400	8864500	5193800	4217200	11577000	7653600	4154700	3121500	0.999981	47.3765	3.54152e-30	146.72	128.26	146.72	1	VHNPVVESSIQPQRS(1)PR	VHNPVVES(-64)S(-47)IQPQRS(47)PR	3	-0.37484
AT1G74910.3	217	S	24.302	23.8744	24.9965	24.5346	23.9486	24.3509	24.1687	24.6917	-0.1369	0.491904	0.168884	AT1G74910.3;AT1G74910.2;AT1G74910.1	217;217;217	17735000	29313000	31439000	22175000	41219000	33443000	20079000	20765000	0.974761	15.8683	5.79531e-219	260.5	210.18	253.46	1	RVS(0.975)S(0.025)FEALQPATR	RVS(16)S(-16)FEALQPAT(-160)R	2	-0.19245
AT1G74910.3	218	S	23.13	23.5508	23.9941	23.5472	23.5322	23.5334	23.8141	23.796	0.1134	0.148312	0.538656	AT1G74910.3;AT1G74910.2;AT1G74910.1	218;218;218	7870900	23423000	15693000	11185000	30885000	18977000	15703000	11161000	0.999987	48.9694	2.85321e-247	282.09	250.43	169.98	1	VSS(1)FEALQPATR	VS(-49)S(49)FEALQPAT(-130)R	2	0.26043
AT1G75100.1	169	S	18.9596	18.0865	19.1642	18.7171	13.117	15.2691	11.4123	18.8513	-4.06942	1.63969	0.0100721	AT1G75100.1	169	0	0	551790	393220	0	0	0	362400	0.995872	24.2211	5.13952e-06	78.692	24.221	78.692	1	ETVSSS(0.004)PLS(0.996)R	ET(-42)VS(-37)S(-40)S(-24)PLS(24)R	2	0.85486
AT1G75100.1	23	S	17.1704	16.8262	16.9944	16.8697	18.4533	18.4412	18.6146	20.0302	1.91965	0.000587129	2.86937	AT1G75100.1	23	0	221480	0	109270	913810	556320	427360	0	1	84.8736	2.75873e-13	111.06	84.035	84.874	1	S(1)PGGDDVDIDFGDVFGGPPK	S(85)PGGDDVDIDFGDVFGGPPK	2	-0.71095
AT1G75190.2	20	S	17.4787	17.7829	17.7737	17.3334	16.2552	16.8463	16.9409	17.2003	-0.7815	2.14867	0.00309493	AT1G75190.2;AT1G75190.1	20;20	0	429870	210470	150690	0	184160	133950	115400	0.752521	6.59751	3.55959e-11	103.5	89.081	80.738	1	ETSSVAEAS(0.037)S(0.753)PT(0.165)ES(0.037)QAT(0.008)R	ET(-44)S(-36)S(-36)VAEAS(-13)S(6.6)PT(-6.6)ES(-13)QAT(-19)R	2	0.062601
AT1G75220.1	2	S	20.0103	19.6035	19.49	19.2617	19.5179	18.1857	18.8447	19.3939	-0.605825	1.19735	0.0284834	AT1G75220.1	2	905570	1518400	0	573540	1911200	0	501260	0	1	78.692	4.16545e-22	129.34	87.342	78.692	1	S(1)FRDDNEEAR	S(79)FRDDNEEAR	2	-0.97431
AT1G75240.1	60	S	20.5111	20.2404	20.545	20.3664	19.8634	20.2194	20.1033	14.5404	-1.7341	0.891269	0.0597072	AT1G75240.1	60	1281300	2361000	1436900	1233400	2428400	1908200	1199300	18260	0.980178	17.1198	4.24812e-21	130.56	117.16	83.617	1	S(0.98)PS(0.019)S(0.001)FSISAAAK	S(17)PS(-17)S(-31)FS(-44)IS(-56)AAAK	2	-0.2508
AT1G75660.1	479	S	24.9981	21.7716	17.4742	20.9966	21.3832	21.0135	21.4654	20.0752	-0.3258	0.375117	0.237759	AT1G75660.1	479	0	6824000	171010	1909100	6963600	3308700	3082900	846520	0.963304	17.2017	2.16124e-73	180.66	163.06	107.83	1	RLS(0.963)PGS(0.018)S(0.018)VGAAIVDVENSLESDERENK	RLS(17)PGS(-17)S(-17)VGAAIVDVENS(-91)LES(-110)DERENK	3	0.32142
AT1G76180.2	59	S	21.1851	21.2391	21.1297	21.1108	21.8291	21.5158	21.2814	21.4237	0.346325	0.00600946	1.86193	AT1G76180.2;AT1G76180.1	59;59	2044400	4717700	2155000	2066400	9485500	4686700	2713700	2155600	1	116.539	3.09297e-65	176.87	155.62	116.54	1	VHIS(1)EPEPEVK	VHIS(120)EPEPEVK	2	0.92116
AT1G76380.3	248	S	18.3711	18.5165	18.6672	18.8208	16.7385	17.3848	18.0031	18.3037	-0.986375	1.77126	0.00741688	AT1G76380.3;AT1G76380.1;AT1G76380.2	248;248;249	290720	714740	390970	0	0	0	279710	247940	0.999998	58.5028	9.06131e-05	65.779	57.787	65.779	1	DFGNLRQES(1)DGEEPVSLSQQPK	DFGNLRQES(59)DGEEPVS(-59)LS(-63)QQPK	3	0.3492
AT1G76510.4	112	S	20.9991	20.7379	20.5269	20.2007	20.8244	20.3489	20.323	22.0691	0.2752	0.141747	0.555218	AT1G76510.4;AT1G76510.2;AT1G76510.1;AT1G76510.3	112;112;112;112	1797100	3333200	1419000	1099600	4727400	2087400	1396600	0	0.982797	17.5686	4.3417e-14	117.92	88.94	116.51	1	GDPS(0.017)S(0.983)PHVPEESVK	GDPS(-18)S(18)PHVPEES(-84)VK	2	-0.79873
AT1G76810.1	641	S	13.7063	13.634	13.5594	16.3029	17.5185	19.6708	18.1117	16.3142	3.60315	0.00211931	2.31268	AT1G76810.1	641	0	0	0	73768	478010	0	0	62437	1	104.066	3.14438e-15	124.43	104.72	124.43	1	AHDS(1)EPEAEKPTAK	AHDS(100)EPEAEKPT(-100)AK	3	0.29657
AT1G76810.1	131	S	19.2005	17.348	19.6677	19.4038	19.3458	19.2278	19.2858	19.0808	0.33005	0.141737	0.555243	AT1G76810.1	131	516560	317980	782220	632900	1696300	959660	680500	424900	1	126.709	8.06409e-42	157.51	137.42	153.25	1	EDNES(1)DGDKDDEPVISFTGK	EDNES(130)DGDKDDEPVIS(-130)FT(-140)GK	2	-0.47853
AT1G76810.1	604	S	21.4446	20.6851	21.031	21.1083	21.2004	21.7045	21.3922	21.1981	0.30655	0.0383976	1.07253	AT1G76810.1	604	0	3213500	2012400	2062700	6135000	5341700	2930500	1843500	1	69.279	4.55991e-16	122.52	102.73	122.52	1	S(1)WGTVDLNLK	S(69)WGT(-69)VDLNLK	2	-0.025127
AT1G76850.1	210	S	17.3559	16.6801	16.2465	18.2833	18.026	15.6101	20.0439	19.5725	1.17168	0.0769944	0.789254	AT1G76850.1	210	0	200150	73021	0	679540	78174	0	0	0.832407	7.67146	3.76181e-40	148.96	99.608	122.39	1	LITES(0.001)S(0.025)GS(0.832)PS(0.142)K	LIT(-77)ES(-30)S(-15)GS(7.7)PS(-7.7)K	2	0.12134
AT1G76850.1	180	S	22.729	22.719	23.4978	22.9557	23.0104	23.1704	22.9474	23.424	0.162675	0.116436	0.628616	AT1G76850.1	180	5960800	13159000	11125000	7423000	21511000	14755000	8611800	8624000	0.999999	62.7108	1.45473e-194	252.37	208.41	232.6	1	VALTSLQS(1)LPR	VALT(-63)S(-78)LQS(63)LPR	2	0.22141
AT1G76880.1	365	S	16.9252	18.7576	19.514	19.1916	19.1036	19.5835	20.0224	19.8545	1.0439	0.0313023	1.15777	AT1G76880.1	365	106710	844760	703200	546350	1434200	0	1133900	726430	1	70.8006	5.88306e-07	73.771	71.122	73.771	1	S(1)PPPQPPAPLPQPIQAVVSTLDTTK	S(71)PPPQPPAPLPQPIQAVVS(-71)T(-72)LDT(-73)T(-73)K	3	0.064466
AT1G76970.5	203	S	17.6118	18.2596	17.7236	17.1588	13.913	12.2617	13.4062	14.1469	-4.2565	4.25957	2.38869e-05	AT1G76970.5;AT1G76970.7;AT1G76970.4;AT1G76970.6;AT1G76970.3;AT1G76970.2;AT1G76970.1	203;265;265;291;291;291;291	171750	598170	0	0	0	0	0	0	1	51.8437	4.75702e-05	51.844	38.252	51.844	1	APPPVQIVDINHDDEDDES(1)DDEFAR	APPPVQIVDINHDDEDDES(52)DDEFAR	3	-0.48304
AT1G77120.1	229	S	18.7716	17.7148	18.3318	18.3564	17.0714	18.1533	17.9019	18.2791	-0.442225	0.901394	0.0582347	AT1G77120.1	229	383720	0	309880	306220	0	455680	260760	243750	1	41.3995	0.00348566	41.399	17.369	41.399	1	IIGVDFNS(1)K	IIGVDFNS(41)K	2	0.26189
AT1G77180.3	235	S	22.2643	22.6736	22.7827	22.4179	22.4324	22.4831	22.3645	22.293	-0.141375	0.821371	0.0710304	AT1G77180.3;AT1G77180.2;AT1G77180.1	235;235;235	4319500	12752000	6777300	5113000	14410000	9163200	5749300	3937700	0.991469	20.718	2.69977e-08	90.968	83.691	73.109	1;2	AS(0.009)GS(0.991)PPVPVMHS(0.976)PPRPVT(0.024)VK	AS(-21)GS(21)PPVPVMHS(16)PPRPVT(-16)VK	3	-0.038822
AT1G77180.3	243	S	22.3529	22.7599	22.8805	22.5082	22.3595	22.6514	22.5065	22.48	-0.126025	0.718946	0.0920563	AT1G77180.3;AT1G77180.2;AT1G77180.1	243;243;243	4592900	13538000	7252500	5443200	13700000	10297000	6343900	4482700	0.996321	24.4176	2.69977e-08	90.968	83.691	89.197	1;2	AS(0.035)GS(0.965)PPVPVMHS(0.996)PPRPVT(0.004)VK	AS(-14)GS(14)PPVPVMHS(24)PPRPVT(-24)VK	3	-0.024201
AT1G77760.1	537	S	19.673	19.3196	19.181	18.7695	18.5369	18.3082	17.926	17.7944	-1.0944	2.60411	0.00108187	AT1G77760.1	537	716770	1247100	0	407770	968320	507340	265150	174190	0.973091	16.1394	0.00101465	70.622	50.835	65.563	1	S(0.003)VS(0.973)S(0.024)PFMNTASK	S(-25)VS(16)S(-16)PFMNT(-44)AS(-51)K	2	-0.72843
AT1G78020.1	80	S	20.982	20.7947	21.3636	21.0358	20.7103	20.753	20.7979	21.0225	-0.2231	1.10981	0.035108	AT1G78020.1	80	1775900	3467100	2534200	0	4367900	2762100	1941000	1632300	0.99932	31.6746	1.35784e-06	98.507	81.628	83.37	1	RHS(0.999)GDFS(0.001)DAGHFLR	RHS(32)GDFS(-32)DAGHFLR	4	-0.25621
AT1G78020.1	16	S	18.892	17.7394	18.762	18.8075	19.2083	18.3729	18.5791	18.939	0.2246	0.13089	0.584681	AT1G78020.1;AT1G22160.1	16;16	0	0	417530	418640	1542100	530590	416970	385130	0.998601	30.5161	0.000419016	80.231	58.145	80.231	1	TTS(0.999)LS(0.001)EIK	T(-48)T(-33)S(31)LS(-31)EIK	2	0.42567
AT1G78150.1	117	S	17.9826	20.9624	18.2402	21.7647	20.6437	14.115	11.8077	16.4216	-3.99047	1.26846	0.0240597	AT1G78150.1;AT1G78150.2;AT1G78150.3	117;117;146	222080	3894400	0	0	4170700	0	0	0	0.999092	32.1381	2.86275e-15	82.789	74.591	51.544	1	DDASEPLPVYQQAVNGISQIS(0.001)FGEEENLS(0.999)PK	DDAS(-39)EPLPVY(-42)QQAVNGIS(-39)QIS(-32)FGEEENLS(32)PK	3	0.35791
AT1G78150.1	80	S	20.4261	19.2516	19.7846	19.4925	18.5891	19.542	19.2441	19.5928	-0.4967	1.0049	0.0452159	AT1G78150.1;AT1G78150.2;AT1G78150.3	80;80;109	0	1189700	848240	673050	1004000	0	661110	0	0.97013	15.8627	0.000271764	56.359	30.622	56.359	1	EIT(0.025)GS(0.97)GIFS(0.005)R	EIT(-16)GS(16)GIFS(-23)R	2	-0.14897
AT1G78280.1	397	S	18.7523	20.8147	17.3902	20.1652	16.6912	17.7458	19.5457	19.9187	-0.80525	0.61697	0.12008	AT1G78280.1	397	378620	3515600	161340	1072900	0	343550	814830	0	0.965949	14.5892	3.69488e-16	88.987	79.19	88.987	1	AGLLALDDENS(0.966)EDLEEET(0.034)HDEEDNTLSYSDLTR	AGLLALDDENS(15)EDLEEET(-15)HDEEDNT(-33)LS(-45)Y(-60)S(-57)DLT(-61)R	3	-0.43165
AT1G78880.1	163	S	18.7489	18.9985	18.4496	18.1258	16.8843	18.9968	17.9561	17.805	-0.67015	0.98826	0.0470817	AT1G78880.1	163	377730	998260	336240	260990	0	817680	270740	175480	0.997819	29.2841	0.00225023	48.527	34.174	48.527	1	KIS(0.998)GPLDY(0.001)S(0.001)GS(0.001)MK	KIS(29)GPLDY(-29)S(-33)GS(-33)MK	2	-1.6439
AT1G78880.1	171	S	19.5868	19.4182	18.9829	18.779	19.9382	20.1726	19.3125	19.5701	0.556625	0.0183408	1.3835	AT1G78880.1	171	675190	1335400	486620	410450	2557700	1847200	693240	596440	0.879562	8.63605	5.42803e-06	95.651	65.319	53.252	1	ISGPLDYS(0.12)GS(0.88)MK	IS(-49)GPLDY(-47)S(-8.6)GS(8.6)MK	2	-0.12887
AT1G78880.1	131	S	19.8202	19.2129	18.2464	17.9906	21.0845	20.8368	21.0194	19.4094	1.77	0.00494952	1.94571	AT1G78880.1	131	0	1158200	292060	237640	5661100	2927400	0	533580	0.999156	33.9154	1.62668e-11	73.602	67.572	73.602	1	QNS(0.999)GPIPILPTTGLITSGPITSGPLNSSGAPR	QNS(34)GPIPILPT(-34)T(-34)GLIT(-46)S(-51)GPIT(-60)S(-63)GPLNS(-69)S(-68)GAPR	3	-0.061403
AT1G78880.1	78	S	16.6845	16.2729	15.9021	16.3715	16.3155	13.5851	13.6172	14.7501	-1.74077	1.70766	0.00859847	AT1G78880.1	78	90309	150930	57515	0	207630	0	0	0	0.99592	24.1456	0.000994271	48.704	43.739	48.704	1	S(0.004)GAQS(0.996)GPVPNATGR	S(-24)GAQS(24)GPVPNAT(-36)GR	2	0.0029498
AT1G79040.1	58	S	19.0038	19.2698	18.6598	18.3963	20.2871	20.314	19.5346	19.6345	1.11013	0.00168267	2.41264	AT1G79040.1	58	450750	1204800	388980	314820	3257400	2037400	808600	623680	1	42.0009	0.000239676	76.655	56.869	42.001	1	PFGINGS(1)MDLR	PFGINGS(42)MDLR	2	-1.2105
AT1G79090.3	208	S	16.9495	17.3894	17.7551	17.9328	12.9116	11.9477	12.643	17.6444	-3.72002	1.81793	0.00665549	AT1G79090.3;AT1G79090.2;AT1G79090.1	208;208;208	108520	327240	0	228310	0	0	0	156990	0.824189	6.90274	0.000530702	53.828	35.233	53.828	1	SSFVS(0.004)Y(0.003)PPPGS(0.168)IS(0.824)PDQR	S(-36)S(-36)FVS(-23)Y(-24)PPPGS(-6.9)IS(6.9)PDQR	2	0.22464
AT1G79280.1	2022	S	22.1732	21.8802	22.2148	22.0946	22.1728	22.4443	22.2369	22.4605	0.237925	0.0137399	1.50665	AT1G79280.1;AT1G79280.3;AT1G79280.2	2022;2023;2044	4055200	7357800	4571700	4086500	12037000	8920300	5262700	4422700	0.999999	62.293	1.32439e-64	175.93	164.01	175.93	1	RAPS(1)PGGGSSTIVTLADR	RAPS(62)PGGGS(-62)S(-93)T(-110)IVT(-150)LADR	3	0.039854
AT1G79280.1	1928	S	18.9518	18.2885	18.6803	19.2117	18.7863	18.8335	18.7323	18.7051	-0.018775	0.333484	0.270834	AT1G79280.1;AT1G79280.3;AT1G79280.2	1928;1929;1950	0	610270	394540	554000	1151000	730140	463680	327480	0.904716	10.7763	1.50848e-19	131.48	114.41	111.92	1;2	EEVQPET(0.001)LAT(0.978)PT(0.041)QS(0.905)PS(0.076)R	EEVQPET(-32)LAT(17)PT(-17)QS(11)PS(-11)R	2	-0.69623
AT1G79280.1	663	S	18.4117	18.0584	18.2745	19.2214	17.6528	17.1772	18.6026	17.1046	-0.8572	1.33606	0.0205085	AT1G79280.1;AT1G79280.3;AT1G79280.2	663;663;663	299000	520290	0	0	524650	231640	0	107990	0.988833	22.4821	0.000113262	71.223	39.851	71.223	1	S(0.006)S(0.006)DLS(0.989)PAVVPGR	S(-22)S(-22)DLS(22)PAVVPGR	2	-0.43608
AT1G79570.3	155	S	17.1369	17.678	17.3087	19.9679	17.4754	18.244	16.7484	17.8466	-0.444275	0.548516	0.144362	AT1G79570.3;AT1G79570.5;AT1G79570.4;AT1G79570.2;AT1G79570.1	155;155;155;155;155	0	399710	152480	0	463930	0	117220	0	0.98149	17.245	7.33137e-05	69.979	64.153	66.595	1	DS(0.019)S(0.981)VGNLHGYK	DS(-17)S(17)VGNLHGY(-58)K	2	-0.52977
AT1G79570.3	867	S	18.0007	17.0503	18.1712	18.3743	16.7956	16.9856	17.7708	18.182	-0.465625	0.783064	0.0782054	AT1G79570.3;AT1G79570.5;AT1G79570.4;AT1G79570.2;AT1G79570.1	867;867;867;867;867	224890	0	0	310050	289610	202840	238110	0	0.853984	7.67413	0.00301477	42.395	29.439	42.395	1	LPYVS(0.146)PLS(0.854)R	LPY(-38)VS(-7.7)PLS(7.7)R	2	1.006
AT1G79570.3	323	S	17.6909	16.1833	17.2327	19.4053	19.3946	21.0895	22.2001	19.9056	3.0194	0.00364115	2.07834	AT1G79570.3;AT1G79570.5;AT1G79570.4;AT1G79570.2;AT1G79570.1	323;323;323;323;323	181430	0	144650	633580	0	3487600	0	752610	0.808899	7.05579	2.02129e-82	191.95	164.46	137.61	1	NSTLLGLDS(0.032)S(0.159)S(0.809)ANNLAELDVR	NS(-67)T(-59)LLGLDS(-14)S(-7.1)S(7.1)ANNLAELDVR	2	-0.16356
AT1G79770.1	32	S	18.9626	18.6249	18.807	18.7033	13.6964	14.5645	13.6854	12.526	-5.15637	5.0237	3.90867e-06	AT1G79770.1	32	438060	770540	430770	389460	0	0	0	0	0.993394	23.0629	0.000802314	51.695	35.93	51.695	1	S(0.005)LS(0.993)DIS(0.002)LDYHREEEK	S(-23)LS(23)DIS(-28)LDY(-41)HREEEK	3	-0.2916
AT1G80120.1	105	S	18.3033	15.9844	14.253	15.3627	17.6504	14.681	18.178	21.268	1.9685	0.0614217	0.879811	AT1G80120.1;AT3G15810.1	105;118	277360	123570	18338	0	523770	41058	0	0	0.965179	14.4277	5.12005e-07	102.07	27.147	102.07	1	RS(0.035)S(0.965)IIGR	RS(-14)S(14)IIGR	2	0.054264
AT1G80180.1	98	S	18.0396	18.1561	18.2729	18.345	16.9641	18.0006	18.7492	18.3708	-0.182225	0.483644	0.172866	AT1G80180.1	98	0	556770	297480	303820	0	409900	0	259750	1	41.0916	0.000116975	80.638	52.669	41.092	2	VS(1)PAVDPPS(1)PR	VS(41)PAVDPPS(41)PR	2	0.74243
AT1G80180.1	105	S	19.8488	19.7876	18.2729	19.6822	19.8942	19.9829	19.4364	18.3708	0.0232	0.286664	0.315887	AT1G80180.1	105	809660	1725000	297480	767620	2480900	1619600	755390	259750	1	41.0916	5.2845e-22	125.53	104.9	41.092	1;2	VS(1)PAVDPPS(1)PR	VS(41)PAVDPPS(41)PR	2	0.74243
AT1G80180.1	16	S	18.9634	19.1578	18.0387	19.7845	19.2464	20.2559	20.339	18.5216	0.604625	0.0771734	0.788332	AT1G80180.1	16	0	1114800	252910	0	1583400	0	0	288360	0.983402	17.7268	8.53822e-07	97.86	45.167	69.602	1	RQGS(0.983)S(0.017)GIVWDDR	RQGS(18)S(-18)GIVWDDR	2	0.88604
AT3G06820.1	81	S	19.1532	17.8092	19.0881	18.8849	18.2728	18.526	18.4454	18.6068	-0.2711	0.66616	0.105515	AT3G06820.1;AT1G80210.2;AT3G06820.3;AT3G06820.2;AT1G80210.1	81;162;162;162;162	0	0	523440	441700	806310	589990	380070	305910	0.9723	15.4532	0.00626932	53.756	42.388	53.756	1	S(0.028)MS(0.972)LVLANK	S(-15)MS(15)LVLANK	2	-0.057839
AT1G80270.5	70	S	17.5965	20.6802	18.4481	18.812	20.7678	19.6224	19.8402	19.3841	1.01943	0.047028	0.98873	AT1G80270.5;AT1G80270.4;AT1G80270.3;AT1G80270.2;AT1G80270.1	70;70;70;70;70	169940	3202600	335900	419960	4545500	1261500	999360	524300	1	145.937	1.86976e-52	167.99	153.57	167.99	1	S(1)DQEEDDLEDGFSELEGSK	S(150)DQEEDDLEDGFS(-150)ELEGS(-160)K	2	-0.21812
AT1G80490.1	214	S	19.392	21.4066	20.9637	20.3253	20.8714	22.2865	21.4935	21.0956	0.91485	0.031299	1.15781	AT1G80490.1;AT1G80490.3;AT1G80490.2	214;214;214	589910	5298700	1920800	1198800	4884000	7996200	3143500	1717100	1	100.857	2.00669e-20	128.74	103.42	119.69	1	APS(1)PVNNPLLGSLPK	APS(100)PVNNPLLGS(-100)LPK	2	-0.11976
AT1G80680.1	523	S	17.8982	16.4704	18.1629	17.4636	17.7887	17.7271	17.4732	17.4556	0.112375	0.21406	0.409891	AT1G80680.1	523	209460	0	275640	164920	576460	0	193730	137740	0.999747	35.9715	1.92984e-05	76.548	49.819	76.548	1	LMYAAS(1)DNEEDVMQDVK	LMY(-36)AAS(36)DNEEDVMQDVK	2	-0.38217
AT1G80810.5	530	S	16.566	16.2991	16.5629	17.8558	16.0325	15.4177	16.3699	17.0037	-0.615	0.904343	0.0578133	AT1G80810.5;AT1G80810.1;AT1G80810.4;AT1G80810.2;AT1G80810.3	530;478;478;478;530	83192	153690	0	0	170650	68416	0	0	0.836772	7.09812	0.00295746	43.382	33.151	43.382	1	QLANES(0.837)EEET(0.163)PK	QLANES(7.1)EEET(-7.1)PK	2	-0.25543
AT1G80930.1	213	S	17.0407	12.0255	12.1543	14.5514	15.4186	16.2744	16.3787	17.0935	2.34832	0.0235556	1.27742	AT1G80930.1	213	115600	0	0	0	0	123890	90719	0	1	58.6706	2.49792e-28	136.35	123.58	58.671	1	DHRAS(1)DDDEEGEIR	DHRAS(59)DDDEEGEIR	3	0.0332
AT1G80930.1	112	S	19.472	18.3249	18.6609	18.2932	18.6073	17.9083	18.2465	18.3356	-0.413325	0.938092	0.0532143	AT1G80930.1	112	623540	625870	389280	293110	1016700	384510	331110	253480	1	44.2941	2.72532e-92	194.23	155.45	44.294	1	RIEVDS(1)DGDGERR	RIEVDS(44)DGDGERR	3	-0.15208
AT1G80930.1	187	S	18.3828	18.52	18.1433	17.7016	18.7765	17.6041	17.4021	17.5287	-0.359075	0.739404	0.0873635	AT1G80930.1	187	293070	716510	271920	194500	1143200	311400	184410	144900	1	78.2344	4.79814e-28	144.97	129.72	78.234	1	VIADKPS(1)DEEDDRQR	VIADKPS(78)DEEDDRQR	3	0.21701
AT2G01070.1	484	S	17.1811	15.3011	16.5584	16.4911	16.4039	16.8996	16.734	16.6817	0.296875	0.122673	0.608929	AT2G01070.1	484	127420	0	90645	84051	0	191100	0	80553	1	110.293	7.37222e-09	110.29	75.089	110.29	1	NAES(1)DREEDVEEDK	NAES(110)DREEDVEEDK	2	-0.25159
AT2G01420.1	395	S	18.6121	18.9106	18.3217	17.9762	19.2707	19.2457	18.0767	18.0732	0.211425	0.158774	0.513976	AT2G01420.1	395	343560	939260	307710	235290	1610300	971600	294340	211330	1	109.061	2.95685e-14	117.37	96.912	117.37	1	S(1)GGDDIGGLDSGEGER	S(110)GGDDIGGLDS(-110)GEGER	2	-0.55551
AT2G01910.1	6	S	17.4324	17.0028	18.999	16.9118	18.2119	16.4146	16.2771	17.928	-0.3786	0.517987	0.157015	AT2G01910.1	6	0	250320	0	112510	772980	136540	84551	0	1	41.0524	0.0302746	41.052	24.828	41.052	1	MLEIGS(1)PNALFFR	MLEIGS(41)PNALFFR	2	0.20921
AT2G01980.1	1054	S	19.0179	19.2081	19.2411	19.4098	19.4283	19.4614	19.2339	19.0935	0.08505	0.124386	0.603724	AT2G01980.1	1054	455160	1154400	581990	635550	1796200	1128300	656450	428640	0.999786	37.2678	4.69461e-22	126.71	111.17	94.616	1	SVS(1)FGGIYNNK	S(-37)VS(37)FGGIY(-46)NNK	2	0.10277
AT2G02070.2	71	S	21.4966	21.5084	21.7667	21.4367	21.3422	21.4387	21.2023	21.2351	-0.247525	1.76381	0.00754634	AT2G02070.2;AT2G02070.1	71;71	2537100	5686000	3351200	2590000	6768500	4442900	2568900	1891400	1	168.273	7.33583e-278	294.05	282.61	233.49	1;2	TPNSDAEVIALS(1)PK	T(-230)PNS(-170)DAEVIALS(170)PK	2	-0.13952
AT2G02080.5	73	S	19.1268	19.5994	19.7339	19.4146	19.5184	19.2635	19.1547	19.2791	-0.16475	0.795332	0.0758252	AT2G02080.5;AT2G02080.4;AT2G02080.3;AT2G02080.1	73;73;73;73	490840	1514100	818970	637690	1911900	983700	621420	487490	1	82.4822	1.21044e-11	110.12	95.379	82.482	1	NQPGNPNPDAEVVALS(1)PK	NQPGNPNPDAEVVALS(82)PK	2	0.27131
AT2G02170.5	19	S	17.9503	17.9207	17.2348	17.2119	18.2525	17.397	16.9074	17.2	-0.1402	0.451944	0.189249	AT2G02170.5;AT2G02170.4;AT2G02170.2;AT2G02170.1	19;19;19;19	217160	472950	144860	138520	795070	269760	130880	115370	0.873342	8.99002	0.000213988	65.472	55.684	65.472	1	TQVTS(0.016)S(0.11)GGGFS(0.873)PGK	T(-62)QVT(-33)S(-17)S(-9)GGGFS(9)PGK	2	0.20623
AT2G02950.1	244	S	17.2078	16.5243	18.1706	16.6131	16.7895	18.846	18.44	18.2688	0.957125	0.0348741	1.1126	AT2G02950.1	244	129800	0	277110	0	0	736520	0	242020	0.999999	63.0011	6.52342e-06	79.633	58.002	79.633	1	SLEVFGS(1)PVAIEK	S(-63)LEVFGS(63)PVAIEK	2	0.79212
AT2G03150.2	132	S	19.597	19.5334	19.5151	19.5624	19.2453	19.3401	19.1988	19.2996	-0.281025	3.95326	4.82094e-05	AT2G03150.2;AT2G03150.1	132;132	0	1446400	703720	706470	1582200	1037300	640690	494490	0.996703	25.8417	4.39743e-51	166.92	148.46	136.81	1	FASGSYLS(0.997)PS(0.003)SHGYGQK	FAS(-44)GS(-38)Y(-68)LS(26)PS(-26)S(-33)HGY(-90)GQK	2	0.8407
AT2G03150.2	122	S	21.0448	21.1944	21.3805	21.1586	20.8868	21.1752	21.1103	21.108	-0.1245	0.932739	0.0539168	AT2G03150.2;AT2G03150.1	122;122	1854900	4573800	2564100	2136000	4936300	3701200	2410300	1731900	0.999999	58.4768	1.96893e-07	100.22	89.071	88.021	1	SGYVPTLPDS(1)PK	S(-79)GY(-80)VPT(-58)LPDS(58)PK	2	-0.69889
AT2G04880.2	260	S	18.7164	17.4972	18.259	18.2009	18.8053	18.5072	18.9837	18.7927	0.60385	0.0147685	1.47581	AT2G04880.2;AT2G04880.1	260;284	369310	0	0	274930	1166300	0	551930	347970	1	48.7409	5.49139e-10	83.182	62.325	48.741	1	GGNIELS(1)PVER	GGNIELS(49)PVER	2	-0.81437
AT2G04880.2	76	S	17.3383	17.1586	17.0764	17.3582	17.3675	17.2185	17.3381	17.1917	0.046075	0.152325	0.528952	AT2G04880.2;AT2G04880.1	76;76	142090	278860	129800	153300	430510	238370	176410	114710	0.969455	15.0163	1.09112e-05	77.693	66.55	77.693	1	LVPHTVASQSEVDVAS(0.969)PVS(0.031)EK	LVPHT(-60)VAS(-60)QS(-60)EVDVAS(15)PVS(-15)EK	3	0.38877
AT2G05990.2	314	S	17.9149	17.468	17.9047	17.7444	17.5864	14.5555	17.316	17.2082	-1.09147	1.05027	0.0405145	AT2G05990.2;AT2G05990.1	314;314	0	345570	0	200360	501040	0	173730	116030	0.979259	16.8556	0.027058	46.159	20.6	46.159	0	VNT(0.001)IS(0.02)AGPLGS(0.979)R	VNT(-33)IS(-17)AGPLGS(17)R	2	2.3929
AT2G07360.1	1125	S	18.3667	17.1955	16.8929	16.5758	18.0906	16.5493	16.918	16.3071	-0.291475	0.509511	0.16076	AT2G07360.1;AT2G07360.2	1125;1127	289820	286080	114300	89129	710640	149900	131840	62131	1	73.4073	3.38945e-30	142.19	134.65	142.19	1	SYES(1)DDEEPRK	S(-73)Y(-87)ES(73)DDEEPRK	2	-0.68878
AT2G07360.1	1090	S	20.6629	21.1574	21.2455	20.8294	21.359	21.1688	20.8562	20.6609	0.037425	0.245214	0.365093	AT2G07360.1;AT2G07360.2	1090;1092	1423500	4458200	2335000	1700200	6847900	3684800	2021100	1270400	0.999855	41.0781	3.23526e-92	186.23	172.39	186.23	1	YQSTYEGYGS(1)PIREEPPPPYSYSEPQSR	Y(-120)QS(-56)T(-41)Y(-56)EGY(-42)GS(41)PIREEPPPPY(-120)S(-110)Y(-130)S(-120)EPQS(-130)R	3	-0.26332
AT2G16070.2	64	S	18.2209	18.0488	18.4716	18.1444	18.3208	18.1916	18.2158	18.3835	0.0565	0.153732	0.525622	AT2G16070.2	64	261970	516860	0	264370	833610	467930	324150	0	0.903858	9.79176	3.60006e-29	138.57	132.34	103.75	1	DFDS(0.001)IS(0.904)S(0.095)EDVDEAEAER	DFDS(-28)IS(9.8)S(-9.8)EDVDEAEAER	2	-0.41793
AT2G16485.2	1266	S	20.3111	20.1893	20.4513	20.1962	20.218	20.2042	20.0576	19.8944	-0.193425	1.32603	0.0209996	AT2G16485.2;AT2G16485.1	1266;1281	1115500	2278900	1346500	1096200	3105000	1888100	1161900	746780	1	46.7296	1.33035e-06	84.658	63.788	46.73	1	AIAPPELS(1)PR	AIAPPELS(47)PR	2	0.028453
AT2G16940.1	143	S	19.4872	18.0901	19.2265	19.0631	19.2366	18.5807	18.7703	18.8581	-0.1053	0.418104	0.208908	AT2G16940.1;AT2G16940.3;AT2G16940.2	143;143;143	0	0	576140	499790	1572700	0	476040	364130	1	97.4306	1.02213e-13	118.5	7.3278	97.431	1	S(1)LEIEPK	S(97)LEIEPK	2	0.16552
AT2G17290.2	540	S	22.0085	20.6231	20.8623	21.0419	21.0157	21.0776	20.9803	21.2912	-0.04275	0.349012	0.257826	AT2G17290.2;AT2G17290.1	540;540	3617700	3078300	1790400	1970000	5397500	3459100	2202600	1966500	1	86.3267	5.50486e-07	101.97	74.645	98.943	1	NSLNIS(1)MR	NS(-86)LNIS(86)MR	2	-0.27969
AT2G17390.1	77	S	15.0289	18.136	11.5387	15.3959	15.3955	15.4782	17.2988	16.8344	1.22685	0.103921	0.672006	AT2G17390.1	77	0	549040	0	0	0	0	171670	89547	1	52.5549	0.00081203	52.555	43.122	52.555	1	DPS(1)FNQLAEQLQR	DPS(53)FNQLAEQLQR	2	0.29209
AT2G17410.2	241	S	19.0913	17.9782	17.9652	17.7941	15.4009	17.1466	17.3523	17.4784	-1.36265	1.5689	0.01188	AT2G17410.2;AT2G17410.3;AT2G17410.1	241;241;241	0	492180	240340	207390	0	226780	178160	139930	1	67.7257	0.000227951	67.726	37.039	67.726	1	EIIS(1)PGEHK	EIIS(68)PGEHK	2	0.014919
AT2G17410.2	219	S	20.6706	20.5109	20.9453	20.0317	20.7793	20.7161	19.8595	21.1386	0.08375	0.225229	0.392918	AT2G17410.2;AT2G17410.3;AT2G17410.1	219;219;219	1431100	2847900	1896400	978060	4581700	2692300	1012800	0	0.990582	20.2194	5.95025e-15	107.74	100.53	92.822	1	HS(0.009)EENQS(0.991)PHHHANNVMEQDQAAEER	HS(-20)EENQS(20)PHHHANNVMEQDQAAEER	4	0.050431
AT2G17410.2	176	S	21.2917	21.6925	22.27	21.3606	21.6654	21.7072	21.3155	21.7457	-0.04525	0.366993	0.243777	AT2G17410.2;AT2G17410.3;AT2G17410.1	176;176;176	2201200	6460100	0	2457000	8468300	5351700	2778700	2694600	0.964385	14.3263	2.14446e-53	162.65	139.35	115.11	1	LSEDT(0.036)GS(0.964)PHHHADILMVQEK	LS(-66)EDT(-14)GS(14)PHHHADILMVQEK	3	-0.10568
AT2G17410.2	491	S	16.9552	15.9213	16.6587	17.1481	11.3365	13.2478	14.1447	18.4076	-2.38668	1.07838	0.0378618	AT2G17410.2;AT2G17410.3;AT2G17410.1	491;491;491	108950	0	0	132530	0	0	0	266460	0.803909	8.03913	1.18975e-05	74.364	67.325	74.364	1	SFLLDDAS(0.069)DGNES(0.804)GT(0.126)EEDQS(0.001)AFMK	S(-45)FLLDDAS(-11)DGNES(8)GT(-8)EEDQS(-31)AFMK	2	-0.4833
AT2G17410.2	64	S	14.9156	13.1498	14.5256	19.1216	17.4889	19.3842	19.985	21.3931	4.13465	0.00760954	1.76022	AT2G17410.2;AT2G17410.3;AT2G17410.1	64;64;64	0	0	0	520470	468320	0	1104900	0	0.99466	27.2675	9.93635e-07	62.942	58.07	49.806	1	VGEEAPVREHEDS(0.995)PCLIVIEEGT(0.002)S(0.002)LAS(0.002)LEEVTNADDLPK	VGEEAPVREHEDS(27)PCLIVIEEGT(-28)S(-28)LAS(-27)LEEVT(-38)NADDLPK	4	-0.15094
AT2G17980.1	478	S	19.8154	19.5646	19.7653	19.7934	18.9576	19.4437	19.478	18.8139	-0.561375	2.00325	0.00433234	AT2G17980.1	478	791110	1478000	837000	0	1296100	1114600	0	353130	0.768368	5.22135	1.39806e-29	146.3	135.08	137.73	1	SLNASFAATS(0.001)ANS(0.768)AS(0.231)R	S(-120)LNAS(-83)FAAT(-45)S(-30)ANS(5.2)AS(-5.2)R	2	1.3392
AT2G19385.1	185	S	19.109	19.101	18.9367	18.6729	18.9322	18.3189	18.6119	18.146	-0.45265	1.48976	0.0142938	AT2G19385.1	185	484830	1071800	471280	381340	1273500	511100	426560	222270	0.997788	26.5425	7.53095e-39	155.08	131.97	155.08	1	LETLDET(0.002)S(0.998)EGEEAK	LET(-120)LDET(-27)S(27)EGEEAK	2	-0.38288
AT2G19460.1	44	S	19.2448	19.4213	19.4139	18.9503	19.0063	19.4348	19.2292	19.2252	-0.0337	0.387951	0.228638	AT2G19460.1;AT2G19460.2	44;96	532690	1338200	656040	462190	1340600	1107700	654320	469610	0.99224	21.1299	2.01709e-15	123.84	91.339	117.23	1	SYS(0.992)T(0.008)SYTDYPTR	S(-44)Y(-56)S(21)T(-21)S(-42)Y(-63)T(-60)DY(-88)PT(-86)R	2	-0.88793
AT2G19480.3	113	S	17.7189	16.1703	17.3642	17.0743	19.0631	19.3027	19.9104	18.9953	2.23595	0.000270215	3.20653	AT2G19480.3;AT2G19480.2;AT2G19480.1	113;113;113	184980	0	158460	125920	1394500	1010800	1049200	400450	1	119.444	6.49978e-28	127.95	116.95	127.95	1	RYEIVNGVVEVEGAAEEVKS(1)EQGEDK	RY(-120)EIVNGVVEVEGAAEEVKS(120)EQGEDK	3	-0.38044
AT2G19520.1	10	S	20.4701	20.5327	20.3261	20.205	20.5215	20.6867	20.4023	20.4767	0.138325	0.044754	1.00914	AT2G19520.1	10	1245400	2891400	1234600	1102900	3832200	2638100	1475500	1118100	0.997653	27.63	1.6874e-08	82.126	78.791	79.898	1	MESDEAAAVS(0.998)PQAT(0.002)TPSGGTGASGPK	MES(-40)DEAAAVS(28)PQAT(-28)T(-33)PS(-44)GGT(-51)GAS(-57)GPK	3	-0.087463
AT2G19600.1	577	S	16.7328	15.1681	16.409	16.816	15.8963	14.1783	13.0762	13.0709	-2.22605	1.86352	0.00598788	AT2G19600.1	577	93387	70175	0	0	155280	0	0	0	0.858625	7.84156	0.000385572	55.401	33.408	55.401	1	GELYHS(0.141)ES(0.859)AK	GELY(-36)HS(-7.8)ES(7.8)AK	2	0.82015
AT2G19810.1	233	S	15.688	19.4221	17.2214	23.4788	18.4673	19.6035	19.6678	18.842	0.192575	0.265348	0.339908	AT2G19810.1	233	45265	1339000	143520	0	922720	1245100	886790	360090	0.991785	20.8183	5.73981e-14	115.82	94.844	67.136	1	S(0.992)LGS(0.008)NLGNDVVASLR	S(21)LGS(-21)NLGNDVVAS(-67)LR	2	0.40483
AT2G20010.2	46	S	18.382	18.3285	19.6209	18.1491	18.1855	13.4669	12.5018	14.1639	-4.0406	1.98881	0.00447932	AT2G20010.2	46	292920	627420	0	265250	758960	0	0	0	0.998126	28.1465	0.000385572	55.401	35.097	55.401	1	PLTY(0.002)IPQS(0.998)PK	PLT(-35)Y(-28)IPQS(28)PK	2	-0.061824
AT2G20050.2	86	S	19.689	19.8046	19.3805	18.9131	19.5835	19.6233	21.2104	21.0227	0.913175	0.023828	1.27255	AT2G20050.2;AT2G20050.1	86;86	0	1745500	641040	450440	2000200	1262300	0	0	0.921777	10.7132	0.000111999	71.349	55.593	64.04	1	VS(0.078)S(0.922)QFLPPDGSR	VS(-11)S(11)QFLPPDGS(-54)R	2	0.14868
AT2G20190.1	259	S	18.4912	18.9789	18.9545	18.5606	18.3658	18.8291	18.6003	18.4529	-0.184275	0.820442	0.0711957	AT2G20190.1	259	315940	984810	477150	352780	859980	727940	423130	274960	1	73.2275	2.27931e-05	86.944	76.991	86.944	1	ENS(1)LFGGDADITEK	ENS(73)LFGGDADIT(-73)EK	2	-0.07759
AT2G20190.1	613	S	20.6896	20.6814	20.9107	20.7627	20.7806	20.8783	20.5493	21.901	0.2662	0.100949	0.683179	AT2G20190.1	613	1450100	3205300	1851400	1623400	4586000	3012800	1633800	0	0.980597	20.0465	2.52691e-09	105	83.701	101.36	1	S(0.01)S(0.01)S(0.981)LDLGVDPPSSR	S(-20)S(-20)S(20)LDLGVDPPS(-95)S(-95)R	2	0.55545
AT2G20190.1	1051	S	18.5902	17.1644	18.827	18.5833	13.1913	14.2376	12.9566	18.7712	-3.50205	1.62538	0.0104136	AT2G20190.1	1051	338380	0	436770	0	0	0	0	342840	0.855301	8.53987	1.61718e-33	139.9	126.92	87.85	1	SYDPSDAIGT(0.017)S(0.12)S(0.855)EEGY(0.007)AGASK	S(-69)Y(-70)DPS(-55)DAIGT(-17)S(-8.5)S(8.5)EEGY(-21)AGAS(-34)K	2	0.66201
AT4G28750.1	102	S	18.0672	18.0183	17.3971	17.132	17.9901	17.3611	17.3506	16.8137	-0.274775	0.655899	0.10838	AT2G20260.1;AT4G28750.1	105;102	0	506040	162110	131060	662820	263140	177940	88269	1	53.6827	0.00016939	71.241	61.009	53.683	1	NVGS(1)VVAVDQDPK	NVGS(54)VVAVDQDPK	2	-0.067415
AT2G20950.1	26	S	17.6897	17.0528	17.0173	16.8129	15.6079	16.527	16.7328	16.9716	-0.68335	1.29539	0.0225755	AT2G20950.1;AT2G20950.4;AT2G20950.8;AT2G20950.7;AT2G20950.2;AT2G20950.3	26;26;53;26;26;26	181280	259150	124590	105050	0	147600	115960	98479	0.973532	14.7493	0.00103019	55.841	48.802	55.841	2	S(0.974)NPS(0.21)S(0.817)PPHLAEGR	S(15)NPS(-6.3)S(6.3)PPHLAEGR	2	-0.82406
AT2G20950.1	30	S	17.6897	17.0528	17.0173	16.8129	15.2568	16.527	16.7328	16.9716	-0.771125	1.21812	0.0271115	AT2G20950.1;AT2G20950.4;AT2G20950.8;AT2G20950.7;AT2G20950.2;AT2G20950.3	30;30;57;30;30;30	181280	259150	124590	105050	0	147600	115960	98479	0.868896	8.28511	0.000636777	55.841	48.802	49.929	1;2	S(0.002)NPS(0.129)S(0.869)PPHLAEGR	S(-26)NPS(-8.3)S(8.3)PPHLAEGR	2	-0.046705
AT2G20960.4	146	S	19.8883	18.7838	19.6571	19.1344	19.5269	19.1187	18.8854	19.1641	-0.192125	0.582969	0.131494	AT2G20960.4;AT2G20960.1;AT2G20960.2;AT2G20960.3	146;146;146;146	832100	0	776530	525120	1923200	889760	515590	450150	0.999601	33.9913	0.000164259	78.285	64.623	78.285	1	GDEDDDVS(1)PRPFGTQPK	GDEDDDVS(34)PRPFGT(-34)QPK	2	-0.16296
AT2G20960.4	302	S	18.6408	17.4557	18.4795	18.3556	16.6533	17.7251	17.871	18.1082	-0.6435	1.0605	0.0395273	AT2G20960.4;AT2G20960.1;AT2G20960.2;AT2G20960.3	302;302;267;232	0	0	343270	306050	0	338660	255240	216520	1	41.3995	0.00769966	41.399	27.242	41.399	1	GRS(1)PEFMER	GRS(41)PEFMER	2	-0.62111
AT2G20960.4	66	S	18.2034	19.1877	18.749	17.5279	18.2343	18.7537	18.2004	18.1009	-0.094675	0.389944	0.227263	AT2G20960.4;AT2G20960.1;AT2G20960.2;AT2G20960.3	66;66;66;66	258810	1138200	413790	0	785060	0	320690	215430	0.99287	24.1543	9.13941e-06	90.926	64.987	41.54	1	S(0.993)PLAS(0.004)Y(0.003)FAK	S(24)PLAS(-24)Y(-25)FAK	2	0.00574
AT2G20960.4	119	S	13.4186	13.8243	16.1191	13.1513	19.3896	20.7691	20.6671	21.3204	6.40822	4.12599e-05	4.02189	AT2G20960.4;AT2G20960.1;AT2G20960.2;AT2G20960.3	119;119;119;119	0	0	66848	0	0	2793100	1772800	0	0.810891	6.91301	7.88319e-08	61.602	55.983	54.658	1	IEPS(0.007)S(0.007)NVDS(0.007)LPVS(0.811)PS(0.165)LALY(0.002)S(0.001)GGDYFAR	IEPS(-21)S(-21)NVDS(-21)LPVS(6.9)PS(-6.9)LALY(-26)S(-32)GGDY(-42)FAR	3	0.48056
AT2G20960.4	447	S	19.5707	22.0963	23.2406	22.4602	23.2805	22.2619	22.2245	21.7046	0.525925	0.143597	0.550461	AT2G20960.4;AT2G20960.1;AT2G20960.2;AT2G20960.3	447;447;412;377	667680	8546500	9308900	5265100	25941000	7860900	5217700	2619000	0.999658	34.653	2.17157e-96	193.47	182.17	161.25	1	NEESVLLFPELILS(1)PQERPPSR	NEES(-84)VLLFPELILS(35)PQERPPS(-35)R	3	-0.027431
AT2G20960.4	400	S	19.6844	17.7074	17.663	17.7345	18.0579	16.7996	17.0525	17.3044	-0.893725	1.08332	0.0374143	AT2G20960.4;AT2G20960.1;AT2G20960.2;AT2G20960.3	400;400;365;330	722440	407940	194920	198990	694740	178300	144730	124030	0.999336	31.78	5.26934e-05	78.486	70.876	78.486	1	TAVY(0.001)GGRS(0.999)PDHR	T(-63)AVY(-32)GGRS(32)PDHR	3	0.2814
AT2G21150.1	132	S	17.4499	17.9353	18.5683	17.8313	18.3616	17.9168	17.8419	17.88	0.053875	0.238056	0.37471	AT2G21150.1	132	153520	477740	365070	212800	857500	386770	250130	184840	1	87.6376	2.87234e-12	111.92	96.533	111.92	1	LSFAEDFENGS(1)DEDDGENK	LS(-88)FAEDFENGS(88)DEDDGENK	2	-0.081977
AT2G21230.2	176	S	16.0313	17.9995	17.9956	18.4722	17.0758	17.1534	17.3253	17.945	-0.249775	0.468233	0.180605	AT2G21230.2;AT2G21230.4;AT2G21230.1;AT2G21230.3	176;176;176;176	57427	499480	245460	331810	351690	227860	0	193360	0.866958	8.90985	0.00298524	41.644	29.851	41.644	1	S(0.111)IS(0.867)GEDT(0.016)S(0.003)DWS(0.003)NLVK	S(-8.9)IS(8.9)GEDT(-17)S(-25)DWS(-25)NLVK	2	0.26006
AT2G21620.1	33	S	19.5236	18.3845	16.7384	18.6003	18.9141	19.7095	19.8963	20.6646	1.48442	0.016018	1.44115	AT2G21620.1;AT2G21620.2	33;33	0	652270	102690	362640	0	1340000	1039000	0	0.999584	33.8103	0.00047554	45.596	40.221	45.596	1	EVVLPSLIPVVPEPELERES(1)GER	EVVLPS(-34)LIPVVPEPELERES(34)GER	3	0.40134
AT2G21660.1	105	S	17.8236	17.9165	16.64	15.6125	15.6168	15.6211	16.8455	16.3959	-0.878325	0.980668	0.0479596	AT2G21660.1	105	198900	471560	0	45714	127930	78775	0	0	0.999512	33.3484	8.01404e-05	70.942	59.68	70.942	1	S(1)GGGGGYSGGGGSYGGGGGR	S(33)GGGGGY(-33)S(-46)GGGGS(-64)Y(-64)GGGGGR	2	0.14429
AT2G22300.2	8	S	20.2737	21.5551	19.545	19.7914	22.3433	21.9534	21.6152	21.0174	1.44102	0.00752027	1.7653	AT2G22300.2;AT2G22300.1	8;8	1086900	5873200	718440	827960	13547000	6347300	3420200	1626500	1	131.803	7.61457e-31	146.06	137.11	146.06	1	RFS(1)PVHELDVGQILSEAR	RFS(130)PVHELDVGQILS(-130)EAR	3	0.57911
AT2G22300.2	964	S	20.2832	19.8891	19.6668	19.5602	19.1322	19.5763	19.2322	19.4392	-0.50485	1.73584	0.00805306	AT2G22300.2;AT2G22300.1;AT5G09410.4;AT2G22300.3;AT5G09410.1;AT5G09410.2;AT5G09410.3	964;964;821;906;924;942;1001	1094100	1850800	781750	705370	1462900	1221900	655700	544730	1	74.1718	7.82371e-06	94.692	47.494	94.692	1	S(1)MVQYPEAR	S(74)MVQY(-74)PEAR	2	-0.14173
AT2G22560.1	896	S	19.3578	18.4636	18.7984	19.2194	18.0706	18.3009	18.2118	18.4993	-0.68915	1.97404	0.00463512	AT2G22560.1	896	0	689020	428210	0	700870	0	323250	0	0.890341	9.09511	0.000313025	57.836	32.981	57.836	1	LIDEFALS(0.11)GS(0.89)K	LIDEFALS(-9.1)GS(9.1)K	2	0.26193
AT2G23140.5	252	S	16.8784	17.1369	17.4651	17.5204	18.0188	18.0456	18.3985	17.7951	0.8143	0.00127392	2.5333	AT2G23140.5;AT2G23140.3;AT2G23140.4;AT2G23140.2;AT2G23140.1	252;252;441;441;444	103300	274700	169940	171550	676160	422900	0	174280	0.876147	9.23195	0.000132151	68.513	53.541	48.741	1	S(0.876)PS(0.105)AT(0.015)S(0.003)T(0.001)VSNEEFPR	S(9.2)PS(-9.2)AT(-18)S(-24)T(-31)VS(-42)NEEFPR	2	-0.86674
AT2G23200.1	465	S	19.8868	19.065	18.804	18.5653	18.8229	19.2944	18.8367	18.6641	-0.17575	0.522615	0.155015	AT2G23200.1	465	831270	1045400	429880	353950	0	1005000	498470	318310	0.997269	28.3081	1.88176e-06	88.036	71.351	88.036	1	GGSSDNRPIS(0.001)QY(0.001)HNS(0.997)PLR	GGS(-57)S(-48)DNRPIS(-28)QY(-29)HNS(28)PLR	3	0.58522
AT2G24590.1	168	S	20.3333	19.061	16.7288	19.8901	12.5681	13.234	17.2872	13.2579	-4.9165	2.27476	0.00231312	AT2G24590.1	168	1132800	1042500	102010	0	0	0	170290	0	0.985599	21.0777	0.00066449	56.548	40.886	41.979	2	NY(0.013)S(0.986)RS(0.986)PPPY(0.015)R	NY(-22)S(21)RS(21)PPPY(-21)R	2	0.024328
AT2G24590.1	170	S	20.3333	19.061	16.7288	19.0946	11.7753	14.5301	17.2872	14.2504	-4.34368	2.03412	0.00403329	AT2G24590.1	170	1132800	1042500	102010	0	0	0	170290	0	0.985599	21.0777	0.00066449	56.548	40.886	41.979	2	NY(0.013)S(0.986)RS(0.986)PPPY(0.015)R	NY(-22)S(21)RS(21)PPPY(-21)R	2	0.024328
AT2G24590.1	48	S	19.0199	18.5672	19.5619	19.2583	20.2395	20.4094	20.3617	20.1113	1.17865	0.00037887	3.05959	AT2G24590.1	48	455800	740320	726940	572200	3151700	2176700	1434600	867920	0.999999	61.533	0.000326381	76.539	61.925	74.698	1	RPPGYAFLDFEDS(1)RDAR	RPPGY(-62)AFLDFEDS(62)RDAR	3	-0.21916
AT2G24940.1	67	S	17.3531	16.6638	17.5577	18.0574	17.92	17.7402	17.9013	17.7483	0.41945	0.046236	0.995717	AT2G24940.1	67	143550	197900	181200	248910	631400	342210	260650	168720	0.981879	17.3659	8.28478e-06	89.541	73.287	89.541	1	NEEDVS(0.982)PS(0.018)LEGLTEK	NEEDVS(17)PS(-17)LEGLT(-39)EK	2	-1.0901
AT2G25170.4	23	S	18.2141	19.8636	16.1799	20.9846	12.6893	12.7909	19.2948	14.6531	-3.95352	1.40611	0.0173914	AT2G25170.4;AT2G25170.1;AT2G25170.2;AT2G25170.3	23;23;40;49	260740	1818400	0	0	0	0	684790	0	0.999451	32.601	0.000671361	51.092	37.429	48.14	1	PVY(0.001)NLDDS(0.999)DDDDFVPK	PVY(-33)NLDDS(33)DDDDFVPK	2	-0.73738
AT2G25430.1	187	S	19.4749	18.2063	19.1637	18.2159	18.1969	13.8332	12.895	14.3215	-3.95355	2.06637	0.00374364	AT2G25430.1	187	624790	576490	0	277820	764990	0	0	0	1	46.4809	0.0160904	46.481	28.672	46.481	1	GRDDFRS(1)PPPR	GRDDFRS(46)PPPR	3	-0.27116
AT2G25650.1	198	S	18.0069	17.9598	17.8185	17.8604	17.7512	17.7043	17.6895	17.303	-0.2994	1.72638	0.00823228	AT2G25650.1	198	225860	485930	217110	217130	561700	333800	225060	123910	1	41.0524	0.0302746	41.052	28.492	41.052	1	IAQENES(1)GEEMLK	IAQENES(41)GEEMLK	2	0.34979
AT2G25720.1	55	S	17.4317	17.7831	18.0546	17.5098	17.8182	16.853	17.6649	17.5238	-0.229825	0.695671	0.0977387	AT2G25720.1	55	151590	429930	255700	170290	588390	0	221260	144400	0.977112	16.3035	2.37006e-07	78.987	53.479	78.987	1	T(0.023)APDGS(0.977)PPPAAAAGDEDIYSIDAAK	T(-16)APDGS(16)PPPAAAAGDEDIY(-63)S(-68)IDAAK	2	-0.08529
AT2G25800.1	9	S	19.3114	17.7899	18.9261	19.068	18.2426	13.657	11.9803	13.7298	-4.37143	2.00862	0.00427839	AT2G25800.1	9	557860	431940	0	0	789630	0	0	0	0.998088	27.1771	0.0334531	54.066	30.036	54.066	0	ELS(0.998)LGHS(0.002)K	ELS(27)LGHS(-27)K	2	1.0314
AT2G26110.1	95	S	19.4838	19.069	19.109	18.585	18.7699	19.6526	18.8942	20.694	0.440975	0.0950298	0.706573	AT2G26110.1	95	0	1048300	531070	358800	1138000	1288200	518730	0	0.999999	59.8759	6.60656e-07	95.417	72.839	95.417	1	S(1)INFSSFTSPDK	S(60)INFS(-60)S(-66)FT(-79)S(-84)PDK	2	-0.39249
AT2G26110.1	142	S	17.7194	16.1119	15.7419	15.6948	16.644	14.2084	12.7696	13.188	-2.1145	1.41639	0.0169766	AT2G26110.1	142	185050	134990	51470	48398	260730	0	0	0	0.997165	25.462	0.00326215	52.716	32.93	52.716	1	S(0.003)PS(0.997)VLHR	S(-25)PS(25)VLHR	2	0.0029303
AT2G26570.2	148	S	19.784	18.9657	18.975	18.9988	19.5299	18.7901	18.9783	18.751	-0.16855	0.55684	0.141122	AT2G26570.2;AT2G26570.1	148;148	774060	975870	483950	477990	1927200	708520	549870	338060	0.99121	21.5713	0.000104584	72.089	54.878	65.563	1	FS(0.007)GS(0.991)PVS(0.001)T(0.001)GTPK	FS(-22)GS(22)PVS(-31)T(-31)GT(-38)PK	2	-0.92508
NA	NA	S	17.6533	17.1939	16.1985	19.588	14.8357	16.6012	16.3257	16.5472	-1.58098	1.28475	0.0231504	AT2G26730.1;AT3G02880.1;AT5G53320.1;AT4G23740.2;AT4G23740.1;AT5G05160.1;AT5G58300.3;AT5G58300.2;AT5G58300.1;AT3G08680.2;AT3G08680.1;AT5G16590.1	353;347;310;339;339;349;360;360;360;343;343;345	0	285770	70632	0	0	155390	87451	73384	1	61.5599	0.000612497	62.463	28.725	61.56	1	AS(1)AEVLGK	AS(62)AEVLGK	2	0.46152
AT2G26890.1	1512	S	19.8515	20.9926	19.263	19.0256	21.7456	21.3029	21.0025	16.9063	0.45615	0.193103	0.444976	AT2G26890.1	1512	0	3976800	590900	486960	8952100	4043800	2236800	94122	0.906737	9.8777	2.61437e-77	189.37	162.4	144.12	1	ILEISLNNVS(0.907)S(0.093)DDLNR	ILEIS(-87)LNNVS(9.9)S(-9.9)DDLNR	2	0.18019
AT2G26910.1	798	S	19.5208	18.4007	19.4068	19.4027	17.7199	18.6266	19.2398	19.4016	-0.435775	0.718585	0.0921417	AT2G26910.1	798	0	0	652830	632450	0	0	659180	530710	0.896668	9.38399	4.56328e-05	75.669	70.671	75.669	1	EYLQHS(0.103)GS(0.897)IHGK	EY(-68)LQHS(-9.4)GS(9.4)IHGK	3	0.28868
AT2G27100.1	76	S	18.9287	17.7439	17.5431	17.9606	13.6123	12.4722	13.4199	12.5004	-5.04288	4.94069	4.77727e-06	AT2G27100.1	76	427870	0	179380	232750	0	0	0	0	1	78.3239	3.5153e-05	96.015	74.551	78.324	1	ERDRS(1)PLPPPR	ERDRS(78)PLPPPR	3	0.5523
AT2G27100.1	90	S	19.2343	19.7086	20.7317	19.3942	19.5449	19.6017	19.2874	19.3627	-0.318025	0.708474	0.0945663	AT2G27100.1	90	528810	1633100	0	628730	1947300	1243600	0	516570	0.999992	50.8067	0.00195533	60.196	52.472	58.268	2	RRPS(1)LS(1)PPPPYR	RRPS(51)LS(48)PPPPY(-48)R	3	-0.34314
AT2G27100.1	92	S	19.2343	19.7086	19.2224	19.3942	19.5449	19.6017	18.2904	19.3627	-0.18995	0.53528	0.149694	AT2G27100.1	92	528810	1633100	0	628730	1947300	1243600	0	516570	0.999984	47.8773	0.00195533	60.196	52.472	51.546	2	RRPS(1)LS(1)PPPPYR	RRPS(48)LS(48)PPPPY(-48)R	3	-0.042815
AT2G27100.1	299	S	16.5645	15.916	17.3986	16.7505	16.0675	15.7809	17.716	17.5569	0.122925	0.236747	0.37651	AT2G27100.1	299	83106	117850	0	0	174840	88003	0	0	0.990124	20.7065	0.00637366	42.338	36.492	42.338	2	S(0.261)GRT(0.354)S(0.394)EPNS(0.99)EDEAAGVGK	S(-1.8)GRT(-0.47)S(0.47)EPNS(21)EDEAAGVGK	2	-0.79745
AT2G27210.2	959	S	20.6906	19.7607	20.7181	20.6598	19.8191	20.163	19.9528	20.2198	-0.418625	1.13784	0.0328289	AT2G27210.2;AT2G27210.1	959;964	1451100	0	1620100	1511600	2355000	1835000	1080500	935760	0.855971	7.75406	1.13445e-06	87.49	74.035	65.25	1	LIHPLPPAIT(0.144)S(0.856)PETSPER	LIHPLPPAIT(-7.8)S(7.8)PET(-35)S(-36)PER	3	0.25378
AT2G27285.1	240	S	17.357	17.0527	16.6935	16.9359	17.1211	16.428	16.3015	16.5361	-0.4131	1.22348	0.0267682	AT2G27285.1	240	143940	259130	99546	114400	362920	137810	85998	72818	0.997663	26.3381	0.00035418	59.542	44.666	59.542	1	EVS(0.998)PDS(0.002)GEFGSSR	EVS(26)PDS(-26)GEFGS(-49)S(-52)R	2	-0.45291
AT2G27285.1	253	S	19.1143	19.7035	20.3443	19.7153	18.9241	19.5379	19.2121	18.9771	-0.55655	1.29672	0.0225046	AT2G27285.1	253	486600	1627400	1250300	785440	1266400	1189800	646640	395430	1	92.8339	2.26948e-06	93.494	77.738	93.494	1	S(1)LEPLEAEQAVSEK	S(93)LEPLEAEQAVS(-93)EK	2	-0.40149
AT2G27710.3	105	S	20.3809	21.4041	21.9492	21.9118	21.8907	21.286	22.2718	21.2404	0.260725	0.14776	0.540015	AT2G27710.3;AT2G27710.2;AT2G27710.1;AT2G27710.4;AT3G44590.2;AT3G44590.1;AT2G27720.1;AT2G27720.4;AT2G27720.3;AT2G27720.2	105;105;105;88;101;101;105;81;117;120	1170800	5289600	3803000	3600100	9899300	3996700	5391500	1898400	1	156.714	3.25819e-106	189.57	184.77	189.57	1	EES(1)DDDMGFSLFE	EES(160)DDDMGFS(-160)LFE	2	0.047812
AT2G28000.1	90	S	19.5798	19.7923	20.3436	19.8967	19.909	20.0291	19.9144	19.8131	0.0133	0.275321	0.328357	AT2G28000.1	90	671920	1730700	1249700	890670	2506500	1672400	1052100	705890	1	132.473	2.43641e-30	139.89	128.02	132.47	1	NVVLDEFGS(1)PK	NVVLDEFGS(130)PK	2	0.040735
AT2G28290.2	3437	S	17.5442	17.1059	17.0877	17.8222	13.2835	17.3954	13.3895	14.2361	-2.81387	1.84799	0.00620722	AT2G28290.2;AT2G28290.4;AT2G28290.3;AT2G28290.6;AT2G28290.1;AT2G28290.5	3437;3451;3451;3452;3482;3483	163890	268860	0	0	0	269470	0	0	0.92775	14.1321	5.39815e-05	53.779	42.468	53.779	1	DHIET(0.001)AECELVDVS(0.928)PGCS(0.036)S(0.036)QPEVK	DHIET(-32)AECELVDVS(14)PGCS(-14)S(-14)QPEVK	3	-0.89042
AT2G28290.2	1906	S	19.7889	20.1052	19.9485	19.839	19.8681	19.8853	20.4991	20.2888	0.214925	0.0590231	0.89594	AT2G28290.2;AT2G28290.4;AT2G28290.3;AT2G28290.6;AT2G28290.1;AT2G28290.5	1906;1906;1906;1907;1906;1907	776700	2149900	950300	855750	2436400	1513700	0	0	0.995321	24.5108	0.000271869	60.943	49.202	55.469	1	TNVPDAQS(0.995)PGEMNLHT(0.004)VET(0.001)HK	T(-33)NVPDAQS(25)PGEMNLHT(-25)VET(-32)HK	3	0.033177
AT2G28360.1	7	S	15.4459	18.3769	16.4957	18.4077	13.9903	13.4189	13.9991	18.2898	-2.25703	1.14102	0.0325803	AT2G28360.1	7	38273	648850	86790	317320	0	0	0	245560	0.997031	25.3891	0.000161405	64.394	44.816	64.394	1	LAS(0.997)LS(0.003)ASSPVESILDK	LAS(25)LS(-25)AS(-42)S(-49)PVES(-50)ILDK	2	0.60951
AT2G29190.2	202	S	20.4283	20.3904	21.5408	19.8092	19.6534	19.712	21.4564	22.6099	0.31575	0.189825	0.450892	AT2G29190.2;AT2G29190.1	202;202	1209900	2619700	0	838240	2099500	1342400	0	0	1	76.1356	3.26921e-05	76.186	53.312	76.186	1	S(1)FADIFQADMGHGHPVTK	S(76)FADIFQADMGHGHPVT(-76)K	3	-0.086172
AT2G29190.2	280	S	19.7528	19.6132	19.9166	19.6113	19.5626	19.663	19.3432	19.5586	-0.191625	1.29794	0.0224396	AT2G29190.2;AT2G29190.1;AT2G29140.2;AT2G29140.1;AT2G29200.2;AT2G29200.1	280;280;268;268;272;272	757520	1528600	929550	730820	1971400	1297500	708120	591700	0.999998	57.3285	0.000141035	73.466	64.737	73.466	1	VPS(1)PCLTPIGSGR	VPS(57)PCLT(-57)PIGS(-66)GR	2	0.4057
AT2G29210.1	453	S	21.206	20.5595	20.5497	20.552	20.6409	20.3651	20.2137	20.4066	-0.310225	1.13826	0.0327961	AT2G29210.1;AT2G29210.2	453;453	2074200	2945500	1441600	1402800	4162600	2110900	1294700	1065100	1	70.1001	1.47044e-07	102.06	61.71	70.1	1	LPS(1)PPVAQR	LPS(70)PPVAQR	2	-0.30056
AT2G29210.1	444	S	22.4505	21.7784	21.6445	21.7947	21.763	21.3706	21.4986	21.5447	-0.3728	1.26132	0.0244703	AT2G29210.1;AT2G29210.2	444;444	4914500	6856300	3078900	3319500	9061000	4238000	3154700	2344200	0.999998	57.0044	3.0881e-28	136.96	92.641	128.03	1	LPS(1)PSIEQR	LPS(57)PS(-57)IEQR	2	-0.17497
AT2G29210.1	472	S	18.3655	17.2047	18.55	18.2776	16.8998	17.7587	18.2782	18.4112	-0.262475	0.532244	0.150949	AT2G29210.1	472	0	0	360480	289950	0	0	338460	267120	1	57.0193	0.000814888	57.019	37.233	57.019	1	RAGLPS(1)PPPAQR	RAGLPS(57)PPPAQR	2	-0.25461
AT2G29210.1	523	S	20.2873	19.6466	20.0721	20.0725	19.491	12.5207	15.0649	14.8552	-4.53667	1.97895	0.00458288	AT2G29210.1;AT2G29210.2	523;504	1097200	1564400	0	0	1875900	0	0	0	1	47.6028	0.00185858	47.603	25.517	47.603	1	VLPS(1)PPVR	VLPS(48)PPVR	2	0.34811
AT2G30530.1	131	S	18.8761	19.1213	19.3752	19.236	18.8577	18.981	18.7263	18.884	-0.2899	1.60799	0.0108444	AT2G30530.1	131	412540	1087000	638680	563400	1209400	808770	461770	370720	1	90.4441	3.57614e-14	115.82	101.13	90.444	1	AFLDEDDPNQLPQS(1)PK	AFLDEDDPNQLPQS(90)PK	2	-0.55854
AT2G30620.2	2	S	18.475	19.2152	19.4186	18.9705	18.4328	18.146	18.2262	18.2618	-0.753125	2.21899	0.00263109	AT2G30620.2;AT2G30620.1	2;2	312420	1160100	658190	468720	900860	453370	326480	240850	1	72.5967	1.23078e-07	90.654	69.354	90.654	1	S(1)IEEENVPTTVDSGAADTTVK	S(73)IEEENVPT(-73)T(-73)VDS(-83)GAADT(-89)T(-89)VK	2	0.45767
AT2G30620.2	14	S	19.756	20.2235	20.0209	19.6089	18.3946	18.3172	19.9257	18.2344	-1.18435	1.79434	0.00703006	AT2G30620.2;AT2G30620.1	14;14	759200	2333600	999210	729600	877360	510500	0	236310	0.981799	21.8279	1.02531e-25	131.31	122.14	127.22	1	SIEEENVPT(0.001)T(0.004)VDS(0.982)GAADT(0.006)T(0.006)VK	S(-110)IEEENVPT(-29)T(-24)VDS(22)GAADT(-22)T(-22)VK	2	-0.10204
AT2G30710.1	50	S	18.022	18.1965	17.8449	17.6131	17.7335	18.0554	17.2541	17.1956	-0.359475	1.03594	0.0419414	AT2G30710.1	50	228230	572560	0	182930	554840	425770	0	115020	0.95484	13.4826	0.000288273	60.564	54.402	60.564	1	RSDPPPY(0.001)PIS(0.955)PT(0.043)Y(0.001)QR	RS(-49)DPPPY(-30)PIS(13)PT(-13)Y(-28)QR	3	0.3066
AT2G30710.1	58	S	21.4798	20.6468	20.4661	19.397	20.7208	20.8948	20.165	20.1273	-0.02045	0.315701	0.286838	AT2G30710.1	58	0	3129200	1360400	0	4399800	3047500	1251700	877650	0.987678	19.0395	1.49819e-48	149.14	125.39	135.49	1	S(0.012)LS(0.988)ENDAGRNELFESPVEVEDHNSSK	S(-19)LS(19)ENDAGRNELFES(-67)PVEVEDHNS(-130)S(-130)K	3	-0.12776
AT2G30860.1	12	S	20.3784	19.3526	19.1088	19.3561	19.4244	14.2852	14.0037	13.7883	-4.17357	1.93104	0.00512043	AT2G30860.1;AT2G30860.2	12;12	1168700	1276000	530990	612320	1791300	0	0	0	1	109.755	1.35557e-15	117.98	109.56	117.98	1	VYGPHFAS(1)PK	VY(-110)GPHFAS(110)PK	2	-0.27858
AT2G31070.1	108	S	18.7052	17.7897	19.0036	18.7574	19.0195	18.1085	18.6825	18.6552	0.05245	0.250851	0.357774	AT2G31070.1	108	366470	0	493650	404350	1353000	0	447950	316350	0.846059	8.24237	0.00177318	45.047	29.455	45.047	1	QEPVNT(0.027)KPES(0.846)PT(0.127)LVFQR	QEPVNT(-15)KPES(8.2)PT(-8.2)LVFQR	3	0.12115
AT2G31820.1	135	S	18.5651	17.6638	18.2677	17.8659	15.7043	16.8166	17.9658	17.8572	-1.00465	1.20046	0.0282739	AT2G31820.1	135	0	0	296400	217960	0	0	272570	181940	1	44.2031	0.00287142	44.203	26.818	44.203	1	QLS(1)FIGER	QLS(44)FIGER	2	-0.057761
AT2G32040.1	67	S	20.316	19.7755	19.3115	19.1542	19.9502	20.0734	19.4493	19.2876	0.050825	0.25191	0.356423	AT2G32040.1	67	1119300	1710600	611100	532360	2579000	1724500	762160	490390	0.985054	18.2046	0.0082963	52.254	43	47.545	1	RRDS(0.985)EES(0.015)LLLDSR	RRDS(18)EES(-18)LLLDS(-43)R	3	0.15885
AT2G32060.3	2	S	20.2698	18.1116	19.8548	19.8704	18.133	17.8989	19.1282	19.0736	-0.968225	1.14274	0.0324464	AT2G32060.3;AT2G32060.2;AT2G32060.1	2;2;2	0	539860	890550	874610	731830	382000	0	422770	0.999974	50.535	1.2976e-05	50.94	45.728	50.94	1	S(1)GDEAVAAPVVPPVAEAAVIPEDMDVSTALELTVR	S(51)GDEAVAAPVVPPVAEAAVIPEDMDVS(-51)T(-51)ALELT(-51)VR	3	-0.53809
AT2G32080.2	206	S	19.3103	19.3716	19.6131	19.2989	19.9685	19.7683	19.6068	19.7198	0.367375	0.00282645	2.18793	AT2G32080.2;AT2G32080.1	206;207	557440	1292900	753160	588510	2611900	1395800	850100	661680	0.99197	21.3712	0.000568231	66.989	59.102	66.989	1	T(0.007)IDS(0.992)PGQEET(0.001)GMTGVSK	T(-21)IDS(21)PGQEET(-31)GMT(-43)GVS(-57)K	2	1.1019
AT2G32120.2	10	S	18.1885	18.4045	19.4736	17.1121	21.5608	21.1476	21.3901	21.6052	3.13125	0.000158546	3.43776	AT2G32120.2;AT2G32120.1	10;10	256140	661360	0	0	7875900	3631100	2926100	2444500	0.995099	23.0767	0	307.21	275.68	283.31	1	AEAAYTVAS(0.995)DS(0.005)ENTGEEK	AEAAY(-180)T(-120)VAS(23)DS(-23)ENT(-60)GEEK	2	-0.14106
AT2G32240.1	1274	S	19.9589	19.5321	20.6509	20.0861	14.2812	12.4537	19.1361	14.6755	-4.92037	2.15274	0.00306606	AT2G32240.1	1274	873840	1445100	1546400	1015600	0	0	613430	0	0.848703	7.82574	3.62545e-22	128.85	86.846	128.85	1	DIDLSFS(0.14)S(0.849)PT(0.011)K	DIDLS(-48)FS(-7.8)S(7.8)PT(-19)K	2	0.18461
AT2G32450.1	562	S	13.8013	15.137	14.6522	12.6096	19.6985	19.9728	19.4068	20.5385	5.85413	1.52006e-05	4.46098	AT2G32450.1	562	0	0	0	0	2166200	1608400	740040	0	0.902525	11.6805	4.50464e-06	89.805	72.603	75.574	1	DNNVPVS(0.031)Y(0.005)S(0.903)GNGIPT(0.061)K	DNNVPVS(-15)Y(-22)S(12)GNGIPT(-12)K	2	-2.6322
AT2G32730.1	896	S	20.2699	19.8756	19.6786	19.4159	20.0388	19.2059	19.5157	19.3986	-0.27025	0.786607	0.0775097	AT2G32730.1	896	1084100	1833500	0	638260	2742400	945210	798100	529610	1	67.7083	2.14742e-37	149.3	128.83	143.38	1	EGDSMQVDS(1)PAAVEK	EGDS(-68)MQVDS(68)PAAVEK	2	-0.16892
AT2G32910.1	599	S	18.3541	18.6167	18.6624	18.5634	17.9887	18.0589	18.1881	18.0786	-0.470575	3.2822	0.000226761	AT2G32910.1	599	287310	766140	389680	353480	662180	426810	317980	212130	0.999995	52.8848	2.54966e-05	81.494	70.884	75.463	1	NS(1)PDPPDSAVTLDSYR	NS(53)PDPPDS(-53)AVT(-67)LDS(-74)Y(-74)R	2	-0.39306
AT2G32910.1	635	S	18.8552	17.8417	18.9223	19.2299	18.5281	18.6074	18.2647	18.2529	-0.299	0.722542	0.0912116	AT2G32910.1	635	406610	0	466610	561060	962390	624240	335320	239370	0.977934	17.0556	0.00418381	49.606	41.708	49.606	1	TYMVS(0.978)PGRQDDDLY(0.003)S(0.019)R	T(-40)Y(-40)MVS(17)PGRQDDDLY(-26)S(-17)R	3	0.080911
AT2G33700.1	365	S	16.9268	13.803	12.5676	13.8037	20.935	18.9867	19.3431	18.8386	5.25057	0.000527119	2.91624	AT2G33700.1	365	106830	0	0	0	5103900	0	708080	359240	0.998307	27.7055	0.000310342	57.96	24.731	57.96	1	S(0.002)IS(0.998)AEGLNLLK	S(-28)IS(28)AEGLNLLK	2	0.2511
AT2G33830.1	45	S	21.7535	21.7585	21.7559	21.3425	20.4231	20.4465	20.1137	19.8806	-1.43662	4.12355	3.25733e-05	AT2G33830.1;AT2G33830.2	45;47	3031500	6762200	3326200	2426300	3579400	2233500	1208000	739660	0.999993	51.2863	4.94528e-171	239.86	221.47	239.86	1	TVAAVAGS(1)PGTPTTPGSAR	T(-130)VAAVAGS(51)PGT(-51)PT(-74)T(-81)PGS(-99)AR	2	-0.045814
AT2G33830.1	54	S	18.0746	17.1918	18.0582	18.2552	14.149	15.2614	15.2686	16.2448	-2.664	3.09387	0.000350182	AT2G33830.1;AT2G33830.2	54;56	236700	0	0	285490	0	0	0	0	0.890032	12.2819	6.76886e-05	71.697	60.91	64.454	1	TVAAVAGSPGT(0.004)PT(0.053)T(0.053)PGS(0.89)AR	T(-54)VAAVAGS(-35)PGT(-23)PT(-12)T(-12)PGS(12)AR	2	0.10082
AT2G34310.5	59	S	19.4605	19.435	20.0801	19.8086	19.3088	19.705	19.6118	19.9365	-0.055525	0.402314	0.218957	AT2G34310.5;AT2G34310.7;AT2G34310.6;AT2G34310.4;AT2G34310.3;AT2G34310.2;AT2G34310.1	59;67;67;67;67;67;67	618600	1351000	1041100	837890	1653400	1335900	853060	768900	0.999908	43.3851	0.000162707	67.456	56.551	67.456	1	DPS(1)PPPLSSLGK	DPS(43)PPPLS(-43)S(-43)LGK	2	0.17862
AT2G34310.5	179	S	20.1906	18.8286	18.689	18.8537	19.1551	18.3655	19.5472	18.1725	-0.3304	0.588293	0.129627	AT2G34310.5;AT2G34310.7;AT2G34310.6;AT2G34310.4;AT2G34310.3;AT2G34310.2;AT2G34310.1	179;187;187;187;187;187;187	1026100	887350	396920	432260	1486300	527870	0	0	1	48.7942	7.74472e-09	105.52	43.558	48.794	1	EEILS(1)PR	EEILS(49)PR	2	-0.25981
AT2G34357.1	1130	S	18.4862	18.3538	18.7885	18.529	17.5467	17.9351	17.7973	17.7883	-0.772525	3.44705	0.000155071	AT2G34357.1	1130	314850	638550	425260	345140	487460	391720	242530	173460	1	88.5523	1.8937e-09	107.14	96.616	88.552	1	ADS(1)DEEAEFDVEGR	ADS(89)DEEAEFDVEGR	2	-0.052494
AT2G34357.1	1101	S	18.6084	19.3992	21.3864	19.0639	18.6999	18.6042	18.7777	20.2768	-0.524825	0.602733	0.124715	AT2G34357.1	1101	0	1317900	0	500060	1084100	622880	478500	0	0.999102	30.4628	2.23319e-06	82.849	76.622	74.763	1	NQS(0.001)HLEVDES(0.999)DDEPLDLMDQHK	NQS(-30)HLEVDES(30)DDEPLDLMDQHK	3	-0.43159
AT2G34410.3	44	S	20.0078	20.3571	20.0473	19.4577	19.9633	20.1285	19.398	19.2532	-0.281725	0.746892	0.0857124	AT2G34410.3;AT2G34410.2;AT2G34410.1	44;44;44	903970	2560000	1017700	657020	2602500	1791600	735530	478820	1	74.7687	8.68754e-29	142.39	132.5	74.769	1	VHS(1)DNNLVELGEVK	VHS(75)DNNLVELGEVK	2	-0.19107
AT2G34680.1	230	S	14.4494	15.2303	17.153	16.9282	15.0261	16.9556	16.9876	17.178	0.5966	0.124575	0.603152	AT2G34680.1;AT2G34680.2	230;290	0	0	136880	0	0	198660	0	113630	0.804577	6.97335	0.00281518	44.318	26.932	44.318	1	S(0.805)FS(0.162)S(0.034)PLDR	S(7)FS(-7)S(-14)PLDR	2	-0.4606
AT2G35050.2	777	S	19.5209	18.3567	19.3859	19.4031	19.5677	19.1149	19.0643	19.0377	0.0295	0.269473	0.335061	AT2G35050.2;AT2G35050.1	777;777	0	0	643450	632590	1978400	887420	583660	412380	0.873463	8.54536	4.28171e-30	136.35	115.25	76.151	1	NVET(0.001)NT(0.001)PEHVS(0.873)QT(0.122)ET(0.003)SAK	NVET(-32)NT(-32)PEHVS(8.5)QT(-8.5)ET(-25)S(-33)AK	2	0.52185
AT2G35050.2	313	S	19.4723	13.7726	13.3859	13.2374	22.8736	21.6348	21.7333	23.0362	7.35242	0.000692383	2.79789	AT2G35050.2;AT2G35050.1	313;313	623690	0	0	0	19565000	0	3712000	0	0.842956	7.845	7.7764e-10	96.44	84.36	96.44	1	RS(0.138)S(0.843)LGLS(0.019)PPGNNLDELLHGNFDR	RS(-7.8)S(7.8)LGLS(-17)PPGNNLDELLHGNFDR	3	0.20424
AT2G35050.2	317	S	11.9859	13.2453	16.8122	14.9212	20.4382	20.2833	17.0436	20.5166	5.32927	0.00161423	2.43066	AT2G35050.2;AT2G35050.1	317;317	0	0	108080	0	3617100	1994600	143840	1149500	0.927071	14.0524	1.07731e-09	94.201	79.431	68.689	1	S(0.036)S(0.036)LGLS(0.927)PPGNNLDELLHGNFDR	S(-14)S(-14)LGLS(14)PPGNNLDELLHGNFDR	3	-0.45196
AT2G35050.2	555	S	18.1271	17.57	17.2744	16.9176	16.4682	17.049	17.1295	17.4022	-0.46005	0.992133	0.0466405	AT2G35050.2;AT2G35050.1	555;555	245480	370870	148890	112960	0	211940	152660	132730	1	82.3339	5.47336e-07	96.591	76.495	96.591	1	S(1)EDHVENNLSAK	S(82)EDHVENNLS(-82)AK	2	0.3919
AT2G35110.2	781	S	26.0168	28.4701	25.7453	29.6688	29.0076	28.5569	26.7165	26.7891	0.292275	0.2231	0.39607	AT2G35110.2;AT2G35110.1	781;810	58218000	708760000	52830000	0	1374100000	617230000	117410000	88859000	1	40.8832	0.00112197	55.649	24.119	40.883	1	S(1)IKMLEAAIQR	S(41)IKMLEAAIQR	2	-3.9912
AT2G35230.3	65	S	17.687	16.4983	17.7617	17.6964	12.7935	14.1451	12.9165	17.2156	-3.14317	1.8808	0.00575238	AT2G35230.3;AT2G35230.1	65;65	180940	0	208730	193810	0	0	0	116630	0.804908	9.16537	0.000104584	72.089	50.86	72.089	1	SIVQQLT(0.098)GS(0.805)PS(0.098)R	S(-68)IVQQLT(-9.2)GS(9.2)PS(-9.2)R	2	0.14219
AT2G35530.1	152	S	19.5103	19.7074	19.7643	19.6712	19.1038	19.3542	19.2736	19.1831	-0.434625	3.17983	0.000287164	AT2G35530.1	152	640300	1631700	836400	761780	1434400	1047500	674800	456120	0.999705	35.2944	0.000138411	84.718	72.504	84.718	1	GS(1)LGSLNMITGK	GS(35)LGS(-35)LNMIT(-75)GK	2	-0.40796
AT2G35630.2	728	S	20.4702	19.3461	19.499	19.6537	11.6135	18.3848	15.13	15.9321	-4.47715	2.00256	0.00433892	AT2G35630.2;AT2G35630.1	728;838	0	1270300	695890	0	0	534970	0	0	0.865267	8.64524	1.27882e-63	170.49	131.06	170.49	1	TSVSTST(0.016)S(0.865)S(0.118)GGLDSLPR	T(-120)S(-120)VS(-72)T(-54)S(-37)T(-17)S(8.6)S(-8.6)GGLDS(-43)LPR	2	-0.19175
AT2G35830.1	4	S	18.0086	19.9998	19.3379	21.1153	21.1829	21.0391	20.8893	21.6633	1.57825	0.0124982	1.54717	AT2G35830.1;AT2G35830.2	4;4	226120	0	0	2072800	6061000	3367900	2067900	0	0.999929	41.5104	2.17279e-23	114.08	106.42	90.955	1	S(1)PVEVNLIPIEATPENFAEYGQVIEASR	S(42)PVEVNLIPIEAT(-42)PENFAEY(-76)GQVIEAS(-88)R	3	-0.040176
AT2G35880.3	242	S	13.4207	19.006	12.4553	13.4358	17.2526	19.0768	17.9565	19.042	3.75253	0.0115878	1.57956	AT2G35880.3;AT2G35880.2;AT2G35880.1	242;242;242	0	1003500	0	0	0	864300	0	413610	0.908561	14.8219	0.00327153	42.789	33.431	42.789	1	S(0.029)S(0.029)VGS(0.909)AS(0.03)GFS(0.003)FR	S(-15)S(-15)VGS(15)AS(-15)GFS(-25)FR	2	0.72937
AT3G53020.1	84	S	16.8597	16.7446	18.3095	17.8647	19.2287	18.9766	18.1259	18.2104	1.19078	0.00985791	1.64891	AT3G53020.1;AT2G36620.1	84;84	101970	0	0	217790	1564100	806280	0	232420	0.999956	43.5834	0.000348002	59.198	48.293	59.198	1	S(1)IVGATLEVIQK	S(44)IVGAT(-44)LEVIQK	2	-0.2443
AT2G36910.1	634	S	18.4342	18.0059	17.5224	17.2098	15.2568	17.8757	17.0974	17.387	-0.88885	0.979983	0.0480397	AT2G36910.1	634	303700	501700	176820	138320	0	375920	149300	131340	0.803526	6.39723	0.000298641	68.355	53.686	68.355	1	NSVS(0.184)S(0.804)PIMT(0.012)R	NS(-50)VS(-6.4)S(6.4)PIMT(-18)R	2	-2.4038
AT2G37050.2	580	S	14.3662	10.6417	14.0212	16.6425	22.0035	22.0044	19.572	20.4128	7.08028	0.000464074	2.97147	AT2G37050.2;AT2G37050.4;AT2G37050.1;AT2G37050.3	580;581;580;581	0	0	0	93351	10704000	0	0	1069700	0.807113	7.79295	6.73828e-22	122.77	107.84	72.707	1	VS(0.054)S(0.807)T(0.134)LS(0.005)EAHGDAAHCFTLYEIEEATK	VS(-12)S(7.8)T(-7.8)LS(-22)EAHGDAAHCFT(-55)LY(-60)EIEEAT(-71)K	3	0.17678
AT2G37080.3	535	S	19.7565	19.1305	19.891	20.3088	19.2642	18.9143	18.8026	20.3356	-0.442525	0.770485	0.080731	AT2G37080.3;AT2G37080.2;AT2G37080.1	535;537;537	759440	1093900	0	0	1603000	772210	486830	0	0.991686	20.7751	9.91444e-05	83.869	52.579	74.841	1	T(0.008)GS(0.992)LESPLR	T(-21)GS(21)LES(-47)PLR	2	0.068034
AT2G37080.3	538	S	17.7296	16.7	16.8731	17.1854	16.5409	16.6526	16.0097	17.346	-0.484725	0.954716	0.0510934	AT2G37080.3;AT2G37080.2;AT2G37080.1	538;540;540	186360	202920	112740	136000	242740	161030	70246	0	0.981863	17.4721	0.00301477	42.395	25.619	42.395	1	T(0.001)GS(0.018)LES(0.982)PLR	T(-32)GS(-17)LES(17)PLR	2	-0.21694
AT3G53420.1	280	S	24.6901	24.7444	24.936	24.5098	23.2311	23.7988	23.0728	22.8651	-1.47812	3.59352	0.000110759	AT2G37170.1;AT2G37170.2;AT3G53420.1;AT3G53420.2;AT2G37180.1	278;321;280;280;278	23210000	53573000	30147000	21798000	25067000	22810000	9393600	5854400	0.999811	37.2395	1.75121e-07	94.673	87.453	94.507	2	SLGS(1)FRS(1)AANV	S(-37)LGS(37)FRS(55)AANV	2	-0.029247
AT3G53420.1	283	S	24.6901	24.7444	24.936	24.5098	23.2311	23.7988	23.0728	22.8651	-1.47812	3.59352	0.000110759	AT2G37170.1;AT2G37170.2;AT3G53420.1;AT3G53420.2;AT2G37180.1	281;324;283;283;281	23210000	53573000	30147000	21798000	25067000	22810000	9393600	5854400	0.999997	54.6285	1.75121e-07	94.673	87.453	94.507	2	SLGS(1)FRS(1)AANV	S(-37)LGS(37)FRS(55)AANV	2	-0.029247
AT2G37340.5	170	S	19.9846	18.5088	18.5015	18.9955	19.484	19.057	19.2119	19.1341	0.22415	0.141862	0.554919	AT2G37340.5;AT2G37340.3;AT2G37340.6;AT2G37340.4;AT2G37340.2;AT2G37340.1	170;170;181;181;181;211	889530	710960	348550	476900	1866900	852490	646530	440900	1	61.6409	1.42359e-76	183.22	170.66	61.641	1;2	DRS(1)PVLDDEGS(1)PK	DRS(62)PVLDDEGS(62)PK	2	0.14179
AT2G37340.5	178	S	19.3866	18.5088	18.5015	18.2796	18.7493	18.6171	18.5376	18.5103	-0.06555	0.396533	0.222789	AT2G37340.5;AT2G37340.3;AT2G37340.6;AT2G37340.4;AT2G37340.2;AT2G37340.1	178;178;189;189;189;219	587690	710960	348550	290360	1121900	628460	405150	286120	1	61.6409	1.42359e-76	183.22	170.66	61.641	2	DRS(1)PVLDDEGS(1)PK	DRS(62)PVLDDEGS(62)PK	2	0.14179
AT2G37340.5	230	S	19.7758	20.1127	16.7847	20.1178	18.0803	19.7629	19.8447	20.0131	0.2275	0.226968	0.390373	AT2G37340.5;AT2G37340.3;AT2G37340.6;AT2G37340.4;AT2G37340.2;AT2G37340.1	230;230;241;241;241;271	769670	2161000	106040	1038200	0	1390600	1002500	810840	0.999995	53.3863	0.00120675	70.412	50.834	70.412	1;2	EDRS(1)PVDDDYEPNR	EDRS(53)PVDDDY(-53)EPNR	2	-0.46844
AT2G37340.5	185	S	20.0662	19.679	19.6402	19.528	20.2073	19.1631	19.3976	19.6491	-0.124075	0.494035	0.167875	AT2G37340.5;AT2G37340.3;AT2G37340.6;AT2G37340.4;AT2G37340.2;AT2G37340.1	185;185;196;196;196;226	941330	1599900	767450	689790	3082100	917590	735340	630030	1	62.0879	2.50177e-30	143.56	85.291	62.088	2	IIDGS(1)PPPS(1)PK	IIDGS(62)PPPS(62)PK	2	0.012647
AT2G37340.5	189	S	20.2985	19.8855	19.8786	19.528	20.3392	19.3679	19.3976	19.8824	-0.150875	0.517248	0.157338	AT2G37340.5;AT2G37340.3;AT2G37340.6;AT2G37340.4;AT2G37340.2;AT2G37340.1	189;189;200;200;200;230	1105800	1846200	905370	689790	3377100	1057500	735340	740620	1	62.0879	2.50177e-30	143.56	85.291	62.088	1;2	IIDGS(1)PPPS(1)PK	IIDGS(62)PPPS(62)PK	2	0.012647
AT2G37340.5	215	S	22.7565	22.3501	21.9876	21.9032	22.6685	22.0003	22.0874	21.9488	-0.0731	0.406091	0.216499	AT2G37340.5;AT2G37340.3;AT2G37340.6;AT2G37340.4;AT2G37340.2;AT2G37340.1	215;215;226;226;226;256	6075700	10190000	3905600	3578900	16972000	6557400	4744600	3102000	1	89.8964	5.06985e-128	224.67	211.24	181.51	1;2	NSVVS(1)PVVGAGGDSSK	NS(-90)VVS(90)PVVGAGGDS(-94)S(-92)K	2	0.37903
AT2G37340.5	224	S	20.4121	20.3729	19.4666	19.1603	19.9816	19.545	18.8923	19.0202	-0.4932	0.871543	0.0626918	AT2G37340.5;AT2G37340.3;AT2G37340.6;AT2G37340.4;AT2G37340.2;AT2G37340.1	224;224;235;235;235;265	1196400	2588100	680440	534620	2635700	1195600	0	407410	0.832727	6.97078	2.54365e-20	128.74	117.13	128.74	1;2	NSVVS(1)PVVGAGGDS(0.833)S(0.167)K	NS(-67)VVS(67)PVVGAGGDS(7)S(-7)K	2	-0.42809
AT2G37550.2	191	S	17.2202	15.7319	16.6386	16.7912	15.5745	13.192	14.2913	13.3462	-2.49448	2.42507	0.00163515	AT2G37550.2;AT2G37550.1	191;191	130920	103730	0	0	124230	0	0	0	0.873868	8.40641	0.000441965	79.148	64.991	62.823	1	S(0.874)S(0.126)EDIYSR	S(8.4)S(-8.4)EDIY(-53)S(-58)R	2	-1.7063
AT2G37790.1	295	S	18.6664	18.8952	19.1006	18.6809	19.7808	19.9533	19.5345	19.6264	0.887975	0.000143341	3.48206	AT2G37790.1	295	356750	929330	527990	383470	2293300	1586800	808540	620190	1	72.2611	1.7484e-13	114.82	91.581	114.82	1	GMS(1)FVHETSPYK	GMS(72)FVHET(-72)S(-83)PY(-110)K	2	-0.12521
AT2G37970.1	136	S	21.1326	20.5105	20.0046	19.9594	20.5271	20.1802	19.9167	20.315	-0.167025	0.522612	0.155016	AT2G37970.1	136	1971300	2847100	987980	930270	3847100	1857000	1053800	999550	0.982989	17.894	7.39634e-23	135.99	82.82	133.07	1	IEMT(0.016)S(0.983)PVVT(0.001)K	IEMT(-18)S(18)PVVT(-30)K	2	-0.19749
AT2G38040.2	741	S	19.754	19.1291	19.1297	18.7549	19.8739	19.0342	19.351	19.3674	0.2147	0.112744	0.640844	AT2G38040.2;AT2G38040.1	741;741	758170	1092900	538760	403660	2446100	839130	711990	518270	0.982606	17.5198	1.46563e-51	168.61	116.61	119.45	1	ELAAEES(0.983)DGS(0.017)VK	ELAAEES(18)DGS(-18)VK	2	0.54172
AT2G38280.2	203	S	20.078	21.4954	21.8465	21.1897	21.1461	22.3203	21.8522	21.3356	0.51115	0.0741812	0.804053	AT2G38280.2;AT2G38280.1	203;203	949030	5635100	3541800	2182500	5908400	8185300	4030800	2027900	0.999926	43.8121	8.65793e-114	211.49	203.49	211.49	1	SHS(1)VSGDLHGVQPDPIAADILR	S(-45)HS(44)VS(-44)GDLHGVQPDPIAADILR	3	0.16776
AT2G38280.2	134	S	19.5399	20.917	17.9122	20.2041	21.0307	19.9176	20.4145	20.1712	0.7402	0.0760341	0.794238	AT2G38280.2;AT2G38280.1	134;134	653600	3773700	231670	1102200	5454000	1548000	1488000	904720	0.990809	20.3303	1.44927e-21	125.22	115.43	81.565	1;2	T(0.009)GS(0.991)FVRPISPK	T(-20)GS(20)FVRPIS(-51)PK	2	0.21612
AT2G38280.2	140	S	22.6688	20.535	21.1576	19.8887	20.3467	19.9176	19.9911	19.7217	-1.06825	1.18735	0.0291703	AT2G38280.2;AT2G38280.1	140;140	0	2895900	0	885780	3394800	1548000	1109600	662550	1	119.498	1.44927e-21	125.22	115.43	125.22	2	T(0.018)GS(0.982)FVRPIS(1)PK	T(-17)GS(17)FVRPIS(120)PK	2	-0.6895
AT2G38410.1	328	S	20.6672	20.7222	20.5928	20.4834	20.5918	20.0183	20.0728	20.0813	-0.42535	1.896	0.0055535	AT2G38410.1	328	1427800	3297200	1485300	1337600	4023300	1659900	1174200	850060	0.919534	11.5612	5.71513e-39	146.53	141.32	50.144	1	HDAIAS(0.001)GS(0.001)PLPVQAS(0.064)GS(0.92)PLS(0.011)VQAS(0.004)K	HDAIAS(-30)GS(-30)PLPVQAS(-12)GS(12)PLS(-19)VQAS(-24)K	3	0.15197
AT2G38410.1	147	S	21.5138	21.656	21.8411	21.525	21.3261	21.3949	21.3801	21.2901	-0.286175	2.23375	0.00254284	AT2G38410.1	147	2567400	6298400	3528500	2753600	6693400	4310100	2905900	1965000	0.998776	29.1161	3.9797e-40	150.36	143.17	150.36	1	RS(0.999)PDAS(0.001)PIITPPVSHPPLR	RS(29)PDAS(-29)PIIT(-110)PPVS(-140)HPPLR	3	-0.093034
AT2G38410.1	596	S	19.5013	17.7873	18.9484	19.1237	19.2615	19.0206	18.6639	18.8733	0.11465	0.214232	0.409622	AT2G38410.1	596	636320	0	0	521240	1600100	831270	442200	367980	0.995158	23.4739	3.4717e-30	136.7	117.6	136.7	1	SLQQS(0.004)NS(0.995)FPTR	S(-110)LQQS(-23)NS(23)FPT(-34)R	2	0.25685
AT2G38770.1	1477	S	20.6827	21.0449	20.8633	20.5157	20.9322	21.0434	20.497	20.8828	0.0622	0.193397	0.44445	AT2G38770.1	1477	1443200	4123600	1791600	1367900	5094000	3378100	1575600	1481600	1	88.8859	0	299.65	280.2	254.23	1	NMQQLNQS(1)PDIDGELSK	NMQQLNQS(89)PDIDGELS(-89)K	2	-0.15946
AT2G39010.1	279	S	13.1932	11.834	13.6475	13.184	21.9644	22.1776	20.1702	20.3974	8.21273	3.47437e-06	5.11879	AT2G39010.1	279	0	0	0	0	10418000	0	1256200	1058300	0.98222	17.3435	7.55073e-05	79.81	63.066	62.357	1;2	AY(0.036)GS(0.982)VRS(0.982)QLHELHA	AY(-17)GS(17)VRS(17)QLHELHA	2	-0.47221
AT2G39010.1	282	S	24.5194	23.6071	23.0055	22.9882	23.3721	22.8718	22.6931	22.8845	-0.574675	1.02403	0.0431677	AT2G39010.1	282	20619000	24354000	7908900	7591900	27641000	11997000	7219800	5933400	1	103.7	6.86227e-20	128.27	120.05	103.7	1;2	S(1)QLHELHA	S(100)QLHELHA	2	0.75565
AT2G39010.1	11	S	24.3003	23.6384	23.3536	23.3754	23.112	23.0115	22.5165	22.2977	-0.9325	2.01137	0.00425164	AT2G39010.1;AT2G39010.2	11;11	17715000	24889000	10067000	9929200	23081000	13217000	6388200	3950600	0.999952	43.2283	1.51001e-192	251.02	227.27	251.02	1;2	TKDELTEEES(1)LSGK	T(-210)KDELT(-78)EEES(43)LS(-43)GK	2	0.26347
AT2G39010.1	13	S	20.6056	20.5703	20.4094	20.1389	21.2321	21.1834	20.7869	20.5112	0.49735	0.0106695	1.61496	AT2G39010.1;AT2G39010.2	13;13	1368100	2967700	1308000	1053500	6271300	3722300	1926300	1145200	0.999749	36.0021	1.24096e-109	208.27	151.71	206.18	1	DELTEEESLS(1)GK	DELT(-160)EEES(-36)LS(36)GK	2	0.53712
AT2G39130.3	132	S	19.1563	18.7205	19.037	18.6754	18.5372	19.1316	20.0357	18.6513	0.19165	0.159346	0.512683	AT2G39130.3;AT2G39130.2;AT2G39130.1	132;132;132	0	823330	505200	382020	968480	897760	0	315500	0.997193	26.4496	0.000190274	69.602	57.074	60.628	1	LSSQGLLS(0.997)PIPS(0.002)R	LS(-41)S(-33)QGLLS(26)PIPS(-26)R	2	0.2222
AT2G39130.3	136	S	19.5085	18.6368	18.0572	17.8597	18.9451	19.2434	18.4515	18.3985	0.244075	0.149906	0.534764	AT2G39130.3;AT2G39130.2;AT2G39130.1	136;136;136	0	776900	256160	217030	1285000	970060	381670	264790	0.998684	30.0491	5.93018e-05	77.527	68.664	49.627	1	LSSQGLLS(0.001)PIPS(0.999)RR	LS(-38)S(-38)QGLLS(-30)PIPS(30)RR	2	0.12409
AT2G39130.3	14	S	13.6881	12.8805	12.7409	17.5921	16.9162	17.0217	17.7872	17.8406	3.16602	0.0076723	1.75668	AT2G39130.3;AT2G39130.2;AT2G39130.1	14;14;14	0	0	0	180290	0	0	240840	179870	0.979723	18.7866	0.00111077	41.423	33.431	41.423	1	MNHVPS(0.004)DQS(0.004)FY(0.013)IES(0.98)EDEDDRK	MNHVPS(-24)DQS(-24)FY(-19)IES(19)EDEDDRK	3	-0.10132
AT2G39480.2	505	S	17.9965	16.5761	17.7118	17.8911	17.3065	14.6379	12.3143	14.4552	-2.8654	1.73157	0.00813359	AT2G39480.2;AT2G39480.1	505;685	224230	186230	0	0	412690	0	0	0	0.83281	6.97335	0.000173296	76.143	60.511	44.318	1	GFQEPS(0.167)S(0.833)PK	GFQEPS(-7)S(7)PK	2	-0.36756
AT2G39730.1	79	S	18.0731	17.7751	18.6962	17.8265	18.3316	16.721	18.3025	18.3718	-0.161	0.434142	0.199289	AT2G39730.1;AT2G39730.3;AT2G39730.2	79;79;79	236450	427550	0	212090	839870	0	344220	259930	0.916862	10.6121	2.06443e-09	106.13	94.264	58.752	1	GLAY(0.003)DT(0.08)S(0.917)DDQQDIT(0.001)R	GLAY(-25)DT(-11)S(11)DDQQDIT(-30)R	2	0.060952
AT2G39800.3	79	S	24.6603	24.9454	24.7297	24.5909	23.9946	24.3001	23.6662	23.6545	-0.827725	2.83053	0.000641927	AT2G39800.3;AT2G39800.4;AT2G39800.1;AT3G55610.2;AT3G55610.1	79;79;79;79;79	22735000	61581000	26131000	23057000	42555000	32288000	14173000	10118000	0.998543	28.3577	1.25034e-92	194.98	161.7	194.98	1	QLVNS(0.001)S(0.999)FADLQK	QLVNS(-28)S(28)FADLQK	2	-0.064374
AT2G39900.1	96	S	19.1116	19.5746	18.8793	18.4182	19.0208	17.4898	18.4424	18.5804	-0.612575	1.04879	0.0406595	AT2G39900.1	96	485720	1488300	452890	319620	1354200	0	379280	300370	0.838819	7.95951	0.00212212	46.964	32.757	46.964	1	T(0.134)PS(0.839)RLAGMFS(0.026)GT(0.001)QDK	T(-8)PS(8)RLAGMFS(-15)GT(-28)QDK	2	1.8808
AT2G39970.1	155	S	15.9124	17.0477	18.7468	16.6008	16.7065	16.7058	16.6117	16.4142	-0.467375	0.628099	0.116595	AT2G39970.1	155	52882	258230	0	90688	272270	0	106620	66918	0.771079	10.0453	0.000549929	47.201	39.999	47.201	1	DQT(0.076)AAPES(0.771)PS(0.076)S(0.076)NAEALVAVEPR	DQT(-10)AAPES(10)PS(-10)S(-10)NAEALVAVEPR	2	0.6505
AT2G40000.1	18	S	18.4257	18.0064	18.1059	18.2504	18.6037	18.2175	18.4436	20.9104	0.8467	0.0530641	0.939246	AT2G40000.1	18	301930	501890	264970	284540	1014200	476420	379590	0	0.999223	34.102	3.66669e-05	84.718	79.559	57.019	1	MVSSDLPNS(0.999)PK	MVS(-34)S(-34)DLPNS(34)PK	2	-0.26056
AT2G40070.3	280	S	19.8783	20.2944	19.7488	19.3116	19.788	19.5964	19.0718	19.1839	-0.39825	1.04158	0.0413735	AT2G40070.3;AT2G40070.2;AT2G40070.1	280;357;397	826350	2451100	827450	593740	2304700	1239000	586720	456370	0.954423	14.3638	0.0189884	44.299	32.074	44.299	1	T(0.005)T(0.005)LPERPLS(0.954)AT(0.035)R	T(-23)T(-23)LPERPLS(14)AT(-14)R	2	0.042097
AT2G40080.1	45	S	19.4446	17.7988	18.5616	18.551	17.5774	18.7441	18.7908	18.717	-0.131675	0.410006	0.213987	AT2G40080.1	45	611790	0	363380	350450	0	686270	482860	330200	1	98.8624	3.1345e-09	104.89	92.609	104.89	1	NRS(1)LIQQVNDNHQSR	NRS(99)LIQQVNDNHQS(-99)R	3	-1.1457
AT2G40620.1	120	S	17.7503	16.5363	17.6463	17.6369	18.4159	19.6957	19.7547	18.2682	1.64118	0.00343711	2.10334	AT2G40620.1	120	0	0	192680	185970	890400	0	0	241910	0.999648	34.7151	8.97494e-16	124.09	106.18	119.56	1	HSLS(1)VDGSSTLESIEAK	HS(-35)LS(35)VDGS(-50)S(-57)T(-57)LES(-71)IEAK	2	0.74759
AT2G40650.1	204	S	17.3831	18.8122	17.2885	16.9472	17.9631	17.7987	16.9243	16.8741	-0.2177	0.468921	0.18025	AT2G40650.1	204	146570	877340	150360	115300	650550	356370	132420	92045	1	62.3783	0.000879748	67.605	61.634	62.378	1	EENEGIADGS(1)EDEMDQR	EENEGIADGS(62)EDEMDQR	2	-0.10159
AT2G40980.1	283	S	17.8316	16.5034	17.3304	17.333	15.8016	17.9449	17.4182	17.9072	0.018375	0.290517	0.311804	AT2G40980.1	283	200010	0	0	150650	0	394390	186480	188360	0.9215	13.7066	1.38071e-10	104.44	91.38	104.44	1	FQQS(0.039)T(0.039)MS(0.922)PEIVEVQEESTK	FQQS(-14)T(-14)MS(14)PEIVEVQEES(-78)T(-78)K	2	-0.11774
AT2G40980.1	95	S	18.4003	17.725	18.1483	18.438	17.8994	18.4644	18.1945	18.2713	0.0295	0.255137	0.352352	AT2G40980.1	95	296650	412950	272860	324050	622450	565330	319390	242430	0.999729	36.2235	0.00135504	64.55	53.763	64.55	1	MPS(1)PVYASSSNALEAK	MPS(36)PVY(-36)AS(-48)S(-48)S(-54)NALEAK	2	-0.20967
AT2G41140.1	333	S	13.7297	14.072	12.8437	12.936	18.8057	18.0503	19.1572	21.1551	5.89673	4.12599e-05	4.02382	AT2G41140.1;AT2G46700.3;AT2G46700.2;AT2G46700.1;AT3G19100.1;AT3G50530.1;AT1G49580.1;AT3G50530.2	333;172;172;353;354;358;360;389	0	0	0	0	1166600	424270	0	0	0.999976	46.1908	0.000272537	81.296	63.53	81.296	1	TES(1)GIFR	T(-46)ES(46)GIFR	2	0.85812
AT2G41740.2	857	S	20.882	20.8289	21.1167	20.8681	21.1368	21.176	21.0825	22.7849	0.621125	0.0430247	1.0254	AT2G41740.2;AT2G41740.1	857;857	0	3550300	2135700	1746400	5870200	3703100	2364200	0	0.898177	9.54781	2.69212e-50	163.8	146.18	139.6	1	S(0.001)T(0.001)S(0.898)S(0.1)NPADDIPLTEAK	S(-29)T(-29)S(9.5)S(-9.5)NPADDIPLT(-100)EAK	2	0.022451
AT2G41840.1	273	S	22.2454	22.6878	22.5883	22.3208	22.3765	22.2406	22.0075	23.6639	0.11155	0.215573	0.407527	AT2G41840.1	273	4263200	12878000	5922900	4780100	13863000	7745800	4489100	0	0.985693	18.668	3.25372e-126	216.77	204.6	150.92	1	ALS(0.986)T(0.013)S(0.001)KPDPVVEDQA	ALS(19)T(-19)S(-30)KPDPVVEDQA	2	-0.18985
AT2G41900.1	510	S	18.8284	19.4586	20.1938	19.7599	19.211	19.2407	19.2003	19.2443	-0.3361	0.844737	0.067007	AT2G41900.1	510	399150	1373300	1126400	810110	1545000	968250	641340	475900	0.959727	13.7717	2.86226e-92	199.65	184.45	179.81	1	FTDSALASAVFS(0.96)PT(0.04)HK	FT(-160)DS(-130)ALAS(-55)AVFS(14)PT(-14)HK	2	0.087557
AT2G41900.1	566	S	20.1579	20.4426	20.4946	20.3057	20.278	20.4876	20.1449	20.3116	-0.044675	0.468142	0.180652	AT2G41900.1	566	1003100	2716200	1387600	1182600	3236900	2298000	1234400	997230	0.98425	17.9583	2.77734e-09	110.38	94.623	64.55	1	NVVEPIS(0.984)PMS(0.016)AR	NVVEPIS(18)PMS(-18)AR	2	-0.35982
AT2G42320.2	630	S	21.6371	21.6127	23.0252	20.877	22.4072	22.5895	20.9469	20.9323	-0.069025	0.338583	0.266467	AT2G42320.2;AT2G42320.1	630;630	0	6112200	0	1757200	14161000	0	0	1533300	0.893378	9.28111	9.45344e-55	162.37	146.98	162.37	1	GY(0.001)T(0.105)S(0.893)DEELEELDSPLTSIVDK	GY(-29)T(-9.3)S(9.3)DEELEELDS(-110)PLT(-120)S(-130)IVDK	2	-0.78383
AT2G42320.2	621	S	16.9726	16.2749	16.142	16.3418	16.7039	13.108	14.0795	13.1255	-2.1786	1.64014	0.0100614	AT2G42320.2;AT2G42320.1;AT3G57780.4;AT3G57780.3;AT3G57780.2;AT3G57780.1	621;621;607;607;607;607	110270	151140	67920	75784	271790	0	0	0	1	43.0002	0.00625767	43	23.906	43	1	NVS(1)MIQR	NVS(43)MIQR	2	-0.2368
AT2G42590.3	239	S	17.9371	19.3262	19.8919	19.2813	19.1071	19.0788	18.7244	18.7396	-0.19665	0.480336	0.174493	AT2G42590.3;AT2G42590.1	239;239	215190	1252900	913760	581410	1437700	865500	461160	335400	0.999991	50.5609	1.74031e-172	238.94	205.24	177.91	1	DNLTLWTSDIS(1)EEGGDDAHK	DNLT(-120)LWT(-74)S(-51)DIS(51)EEGGDDAHK	3	-0.13701
AT2G42600.3	11	S	22.6228	22.151	22.2769	22.4257	23.1951	23.1959	23.1198	23.767	0.95035	0.000420601	3.01415	AT2G42600.3;AT2G42600.2;AT2G42600.1;AT3G42628.1	11;11;11;11	5538000	8876600	4772900	5140800	24450000	15019000	9704900	10939000	1	60.5185	1.69018e-20	132.25	101.68	60.518	1	MAS(1)IDAQLR	MAS(61)IDAQLR	2	-0.3154
AT2G42670.1	55	S	17.0124	15.6383	16.4578	16.7449	16.3866	13.8759	12.2633	14.6076	-2.18	1.57896	0.0116043	AT2G42670.1;AT2G42670.2	55;55	113360	97213	0	0	218120	0	0	0	0.990732	20.2897	0.0300511	40.496	11.77	40.496	1	S(0.009)RS(0.991)GPLNER	S(-20)RS(20)GPLNER	2	1.1409
AT2G42975.1	92	S	15.2336	19.1683	18.92	19.2356	19.6443	19.8457	19.543	18.7551	1.30765	0.0552346	0.922897	AT2G42975.1	92	33035	1123000	465860	563260	2086200	1472700	813310	339030	0.99339	21.9249	7.04401e-118	212.01	193.18	115.66	1	TQLDLLEQLTSTSDGYLS(0.993)DGGGS(0.006)R	T(-100)QLDLLEQLT(-57)S(-51)T(-44)S(-37)DGY(-63)LS(22)DGGGS(-22)R	2	-1.1977
AT2G43130.1	2	S	19.1163	19.3581	19.8387	19.4734	19.3099	19.3463	19.4386	19.0789	-0.1532	0.700231	0.0965953	AT2G43130.1	2	487280	1280900	880650	664180	1654600	1041800	756530	424350	1	78.1941	2.20374e-09	103.85	84.778	103.85	1	S(1)DDDERGEEYLFK	S(78)DDDERGEEY(-78)LFK	2	-0.46459
AT2G43160.4	282	S	18.0779	18.3998	19.1951	18.5755	18.6143	19.2195	18.915	18.5305	0.25775	0.0959383	0.702879	AT2G43160.4;AT2G43160.5;AT2G43160.3;AT2G43160.2;AT2G43160.1	282;282;282;282;282	237250	659200	563710	356460	1021700	954150	526270	290150	1	116.696	3.91563e-32	140.06	111.1	140.06	1	FS(1)EQNIGAPPSYEEAVSDSR	FS(120)EQNIGAPPS(-120)Y(-120)EEAVS(-130)DS(-140)R	2	0.4652
AT2G43410.5	268	S	17.1282	17.6974	17.7576	17.2725	16.581	16.8098	16.8338	17.462	-0.542275	1.46502	0.0151465	AT2G43410.5;AT2G43410.6;AT2G43410.1;AT2G43410.4;AT2G43410.3;AT2G43410.2	268;364;364;407;407;407	122830	405130	0	144460	249590	179560	0	138350	0.999509	33.0835	0.00830638	46.746	41.852	46.746	1	DGS(1)VDGFTPMGVDER	DGS(33)VDGFT(-33)PMGVDER	2	-0.48448
AT2G43650.1	359	S	12.9791	12.8764	12.5329	13.4699	18.1734	18.5981	18.4808	18.6169	5.50273	0	6.88297	AT2G43650.1	359	0	0	0	0	0	620220	389510	0	0.889968	9.16141	2.63974e-06	92.063	78.346	78.763	1	EDQLT(0.108)S(0.89)PVS(0.002)DSVDR	EDQLT(-9.2)S(9.2)PVS(-27)DS(-35)VDR	2	-2.6043
AT2G43650.1	577	S	19.5929	19.8744	19.7272	19.6818	19.5125	20.2173	19.6901	19.7403	0.070975	0.179101	0.471164	AT2G43650.1	577	0	1832000	815140	767420	1904100	1905400	900610	671160	0.866272	8.11431	0.000316937	59.261	46.701	59.261	1	PHLMPS(0.134)S(0.866)PEHVDGK	PHLMPS(-8.1)S(8.1)PEHVDGK	3	-0.62407
AT2G43680.5	231	S	12.6898	13.8772	14.1507	15.4518	18.9377	19.1244	18.6395	18.9714	4.87588	3.2139e-05	4.13015	AT2G43680.5;AT2G43680.4;AT2G43680.3;AT2G43680.2;AT2G43680.1	231;231;231;231;232	0	0	0	0	1278400	893270	0	393880	0.983794	18.5678	0.000599544	75.669	41.283	50.843	1	AEPPT(0.003)LDT(0.014)PRPPS(0.984)PR	AEPPT(-26)LDT(-19)PRPPS(19)PR	2	-0.14424
AT2G43680.5	629	S	20.4159	19.6577	20.3622	19.5907	19.4986	19.4379	19.4888	20.9549	-0.161575	0.443179	0.194112	AT2G43680.5;AT2G43680.4;AT2G43680.3;AT2G43680.2;AT2G43680.1	629;629;629;629;630	1199500	1576500	0	720470	1885800	1110100	783350	0	1	43.5437	8.10173e-21	125.54	104.17	43.544	1	GPGS(1)PGGVVLEK	GPGS(44)PGGVVLEK	2	1.0928
AT2G43680.5	276	S	19.1185	20.8109	18.7279	21.0407	20.2114	21.0713	18.2872	20.9722	0.211025	0.227945	0.388954	AT2G43680.5;AT2G43680.4;AT2G43680.3;AT2G43680.2;AT2G43680.1	276;276;276;276;277	488040	3506200	407780	1968400	3090900	3443900	340590	1576300	1	61.2382	5.24041e-05	83.776	77.813	83.776	1;2	LDAPRPT(0.541)T(0.459)PKPPS(1)PR	LDAPRPT(0.71)T(-0.71)PKPPS(61)PR	3	-0.24822
AT2G43680.5	476	S	17.0546	16.9367	16.8141	17.3423	17.1431	17.3979	17.0825	17.2961	0.192975	0.0456673	1.00081	AT2G43680.5;AT2G43680.4;AT2G43680.3;AT2G43680.2;AT2G43680.1	476;476;476;476;477	116720	239110	108220	151630	368490	269940	147770	123320	0.9865	19.4107	0.000520166	53.3	41.86	46.746	1	QNPLAS(0.986)PAPS(0.011)Y(0.001)S(0.002)QPQR	QNPLAS(19)PAPS(-19)Y(-32)S(-28)QPQR	2	0.5042
AT2G43680.5	147	S	17.3172	17.0612	17.6126	16.7509	16.8451	16.6264	16.8182	17.7561	-0.174025	0.524489	0.154214	AT2G43680.5;AT2G43680.4;AT2G43680.3;AT2G43680.2;AT2G43680.1	147;147;147;147;148	140020	260660	0	100630	299730	158130	0	0	0.971606	15.4459	0.00620689	51.841	31.321	51.841	1	S(0.001)LS(0.028)PKPPS(0.972)PR	S(-32)LS(-15)PKPPS(15)PR	2	0.18908
AT2G43680.5	127	S	17.7948	17.7356	17.8799	17.2632	17.881	17.6372	17.6225	18.0397	0.126725	0.121155	0.613613	AT2G43680.5;AT2G43680.4;AT2G43680.3;AT2G43680.2;AT2G43680.1	127;127;127;127;128	194970	415980	226550	143540	614580	318630	214850	206480	0.90154	9.61424	0.00844979	42.809	20.089	42.809	2	T(0.099)LS(0.902)PKPPS(0.999)PR	T(-9.6)LS(9.6)PKPPS(32)PR	2	-1.1923
AT2G43680.5	132	S	17.7948	17.7356	17.8799	17.2632	17.881	17.6372	17.6225	18.0397	0.126725	0.121155	0.613613	AT2G43680.5;AT2G43680.4;AT2G43680.3;AT2G43680.2;AT2G43680.1	132;132;132;132;133	194970	415980	226550	143540	614580	318630	214850	206480	0.999376	31.5966	0.00844979	42.809	20.089	42.809	2	T(0.099)LS(0.902)PKPPS(0.999)PR	T(-9.6)LS(9.6)PKPPS(32)PR	2	-1.1923
AT2G43750.2	367	S	16.1735	16.6539	17.8237	19.3634	17.5164	19.5175	19.7365	19.2923	1.51205	0.0301253	1.17383	AT2G43750.2;AT2G43750.1;AT3G59760.3;AT3G59760.1	367;367;405;405	63373	0	217890	615450	0	1173100	930090	491970	1	48.0038	3.84097e-06	75.695	9.4329	48.004	1	LIAVVFPS(1)FGER	LIAVVFPS(48)FGER	2	-0.21659
AT2G44160.1	361	S	18.759	18.8888	17.3165	18.7556	17.3644	18.1134	17.9272	19.0054	-0.327375	0.568247	0.136821	AT2G44160.1	361	380390	925180	0	403850	0	443260	265370	0	0.914488	10.4079	3.45389e-05	84.566	73.093	69.714	1	S(0.083)AS(0.914)Y(0.002)GALSDHQFSR	S(-10)AS(10)Y(-26)GALS(-50)DHQFS(-65)R	2	-0.43268
AT2G44440.1	419	S	20.5721	18.7938	19.1205	19.0455	18.7913	18.9434	18.9206	18.9152	-0.49035	0.869081	0.0630753	AT2G44440.1	419	0	866260	535300	493730	1155000	787940	528310	378820	1	60.4007	2.51497e-05	86.467	65.627	60.401	1	LGDIS(1)DGENEGAFR	LGDIS(60)DGENEGAFR	2	-0.84323
AT2G45010.2	188	S	18.3469	18.738	19.0288	18.3898	18.0753	18.4127	17.8053	18.3196	-0.47265	1.48388	0.0144922	AT2G45010.2;AT2G45010.1	188;234	285870	833370	502360	313410	703150	545430	243880	250690	1	56.2251	0.00186878	62.14	57.175	56.225	1	S(1)QHNDLEMVPL	S(56)QHNDLEMVPL	2	0.011047
AT2G45140.1	164	S	20.1833	20.8763	19.9339	20.4433	19.0064	20.1911	20.01	19.2568	-0.743125	1.40805	0.0173128	AT2G45140.1	164	1020900	3668800	940750	0	0	1871100	1124200	480030	0.999987	51.7755	0.00104902	66.246	45.865	63.037	1	FS(1)ADRVDAQDNSSEAR	FS(52)ADRVDAQDNS(-52)S(-52)EAR	2	-0.12387
AT2G45140.1	132	S	21.7071	21.9168	20.8962	21.7471	21.9413	22.2867	21.816	21.9517	0.432125	0.0300723	1.17457	AT2G45140.1;AT2G45140.2	132;132	2935600	7546400	1832900	3211900	10253000	7996900	3931100	3108300	1	102.695	3.62585e-14	124.07	107.4	124.07	1;2	VVYVAPPRPPS(1)PVR	VVY(-100)VAPPRPPS(100)PVR	2	0.086085
AT2G45200.1	51	S	20.4299	20.5417	20.3899	21.2512	19.7105	19.9175	19.6717	19.5225	-0.947625	2.61883	0.00104574	AT2G45200.1	51	1211200	2909500	1290400	0	2184200	1547900	889230	577080	0.985912	20.0545	9.94599e-129	221.79	202.02	182.82	1	FTQGGYVDT(0.004)GS(0.986)PT(0.01)VGSGR	FT(-150)QGGY(-110)VDT(-24)GS(20)PT(-20)VGS(-49)GR	2	-0.10053
AT2G45520.1	76	S	19.4422	18.5366	18.7519	19.7802	18.2976	18.3853	18.0598	18.3079	-0.865075	1.85895	0.0060513	AT2G45520.1	76	0	724770	414630	0	820280	535190	290930	248670	0.896812	9.86277	6.76886e-05	71.697	50.637	52.887	1	AEVVVPAT(0.093)ES(0.897)DGDDS(0.011)VVEK	AEVVVPAT(-9.9)ES(9.9)DGDDS(-19)VVEK	2	-0.12994
AT2G45540.6	1794	S	23.0462	22.8986	22.8674	22.6349	22.7188	22.51	22.5774	22.5817	-0.2648	1.78849	0.00712629	AT2G45540.6;AT2G45540.5;AT2G45540.4;AT2G45540.3;AT2G45540.1;AT2G45540.2;AT3G60920.1;AT3G60920.2	1794;1794;1794;1794;1794;1849;1381;1432	7426700	14904000	7186800	5943000	17575000	9335700	6663400	4810300	0.998481	28.1789	5.71284e-29	145.46	127.98	143.96	1	LQTFS(0.002)S(0.998)FQK	LQT(-91)FS(-28)S(28)FQK	2	-0.23238
AT2G45710.1	80	S	18.0219	17.0766	16.9085	16.6456	18.9877	17.9107	19.3954	18.2698	1.47775	0.00367662	2.07419	AT2G45710.1;AT3G61110.1	80;80	228220	263460	115540	93547	1323500	385140	0	242180	0.999925	41.2563	0.000630285	61.56	46.893	61.56	1	LTEGCS(1)FR	LT(-41)EGCS(41)FR	2	-0.090484
AT2G45710.1	29	S	19.5518	18.0567	18.9119	19.4252	19.4783	19.0177	18.5929	18.1127	-0.186	0.460734	0.184523	AT2G45710.1;AT3G61110.1;AT5G47930.1	29;29;29	0	0	463240	642360	1859500	829600	420980	217200	0.993458	21.8143	0.00928346	49.5	38.01	46.606	1	LVQS(0.993)PNS(0.007)FFMDVK	LVQS(22)PNS(-22)FFMDVK	2	0.011648
AT2G45820.1	64	S	18.6787	16.7631	18.737	17.9632	19.6049	19.6862	20.5502	18.986	1.67133	0.00537539	1.91006	AT2G45820.1	64	0	0	410350	233180	2030000	1318600	0	397860	0.75759	6.5213	0.00050178	71.692	30.048	48.216	1	AS(0.169)S(0.758)GS(0.074)ADRDVILADLEK	AS(-6.5)S(6.5)GS(-10)ADRDVILADLEK	3	0.45532
AT2G45820.1	14	S	19.0963	19.1656	19.4129	19.2039	19.563	19.8091	19.5275	19.4412	0.365525	0.0027705	2.19658	AT2G45820.1	14	480570	1120900	655570	551020	1972000	1435800	804630	545490	1	82.5431	2.98605e-29	145.17	134.01	82.543	1	VDVES(1)PAVLAPAK	VDVES(83)PAVLAPAK	2	-0.0092053
AT2G46020.6	1640	S	18.6461	18.2782	19.1789	17.861	18.3001	18.916	17.722	16.5588	-0.616825	0.790193	0.0768125	AT2G46020.6;AT2G46020.5;AT2G46020.1;AT2G46020.4;AT2G46020.3;AT2G46020.2	1640;1640;1640;1641;1641;1641	351750	605930	0	217220	821740	0	230190	0	1	62.2584	6.24693e-05	79.633	51.306	62.258	1	NIDS(1)GNEEEGDIR	NIDS(62)GNEEEGDIR	2	-0.33898
AT2G46240.1	388	S	13.5386	12.0198	14.2961	14.0187	18.9406	18.8209	19.0367	19.027	5.488	8.25167e-06	4.72044	AT2G46240.1	388	0	0	0	0	1281000	723820	572610	409330	1	56.1471	5.42295e-50	161.84	142.6	56.147	1	EGNFECNVLS(1)DAEEK	EGNFECNVLS(56)DAEEK	2	-0.47013
AT2G46240.1	363	S	13.3814	12.9323	14.086	14.2171	17.0463	17.4578	17.3264	17.3453	3.63975	5.64586e-06	4.89838	AT2G46240.1	363	0	0	0	0	344580	281380	174990	127600	0.878233	8.58079	0.0046732	40.589	16.246	40.589	1	NLES(0.122)CPS(0.878)DLHR	NLES(-8.6)CPS(8.6)DLHR	2	0.67868
AT2G47000.7	642	S	19.934	18.7703	18.1656	18.0586	19.2071	19.3258	18.4245	18.8211	0.2125	0.177514	0.474289	AT2G47000.7;AT2G47000.3;AT2G47000.4;AT2G47000.2;AT2G47000.6;AT2G47000.5;AT2G47000.1	642;642;642;642;642;642;642	858880	852210	276150	249110	1540800	1027100	374590	354890	0.99986	38.5329	0.00183318	85.731	64.267	85.731	1	MSSIES(1)FK	MS(-65)S(-39)IES(39)FK	2	0.4333
AT2G47330.1	160	S	17.3645	17.7852	18.1205	17.959	17.5323	17.7921	18.0347	17.4983	-0.09295	0.477087	0.176109	AT2G47330.1	160	144690	430540	267650	232500	482600	354750	285900	141870	0.999525	33.2279	4.60484e-08	98.796	84.539	71.594	1	AVDAGMLDYDS(1)DDNPIVVDK	AVDAGMLDY(-33)DS(33)DDNPIVVDK	2	-0.48224
AT2G47330.1	140	S	19.0427	19.5035	18.5714	22.9274	19.266	18.5383	18.9172	19.8544	-0.867275	0.665834	0.105605	AT2G47330.1	140	0	1416700	365870	0	1605100	595060	527080	0	0.973641	15.8489	7.30413e-11	95.195	83.895	95.195	1	DLGLTLAADALNAGY(0.025)NS(0.974)DEEVY(0.001)AAAK	DLGLT(-72)LAADALNAGY(-16)NS(16)DEEVY(-30)AAAK	2	-0.067122
AT2G47970.2	104	S	19.3037	19.4725	19.9056	19.5696	19.3566	19.04	19.0979	19.2073	-0.3874	1.73744	0.00802298	AT2G47970.2;AT2G47970.1	104;104	0	1386600	922470	710010	1709100	0	597430	463820	0.982017	17.3726	3.46224e-05	79.022	69.589	71.354	1	SIPGAPPVT(0.018)PAGS(0.982)FGR	S(-68)IPGAPPVT(-17)PAGS(17)FGR	2	0.20653
AT3G01090.3	364	S	21.6441	20.6015	21.5315	21.6734	20.628	20.4486	20.5515	20.5079	-0.828625	2.0357	0.00401882	AT3G01090.3;AT3G01090.1;AT3G01090.2	364;364;387	2810100	3032500	0	0	4125600	2236700	1636300	1142600	0.995246	24.4869	2.48617e-06	93.495	82.451	82.007	1	MHPAES(0.004)VAS(0.995)PVS(0.001)HR	MHPAES(-24)VAS(24)PVS(-29)HR	3	0.07066
AT3G01160.1	441	S	19.3047	19.6664	20.1671	19.4277	19.035	19.0297	19.3373	19.099	-0.516225	1.65181	0.00979172	AT3G01160.1	441	555260	1586000	0	643500	1367600	836540	705260	430300	1	57.0193	4.47956e-15	122.64	114.11	57.019	1	ALIEAEDVDS(1)DK	ALIEAEDVDS(57)DK	2	0.16556
AT3G01310.3	323	S	20.5954	21.6959	21.721	21.1167	23.2333	22.7477	22.2612	21.0976	1.0527	0.0210042	1.32593	AT3G01310.3;AT3G01310.2;AT3G01310.1;AT5G15070.7;AT5G15070.6;AT5G15070.3;AT5G15070.4;AT5G15070.1;AT5G15070.5;AT5G15070.2	323;352;358;110;110;351;351;351;357;351	1358400	6475100	3246700	2074800	25105000	11008000	5352200	1719500	1	168.976	6.85824e-128	224.07	192.55	224.07	1	QGS(1)GIIGTFGQSEELR	QGS(170)GIIGT(-170)FGQS(-190)EELR	2	0.79924
AT3G01390.4	3	S	16.5826	18.9672	20.8592	20.6521	20.0225	21.1213	20.2628	20.0491	1.09865	0.0767456	0.790539	AT3G01390.4;AT3G01390.3;AT3G01390.2;AT3G01390.1	3;3;3;3	84152	976870	1786500	1503600	0	3565400	1339500	831350	0.965629	14.4862	1.61334e-42	147.28	123.89	114	1	MES(0.966)NRGQGS(0.034)IQQLLAAEVEAQHIVNAAR	MES(14)NRGQGS(-14)IQQLLAAEVEAQHIVNAAR	3	-0.13908
AT3G01390.4	9	S	17.7062	20.1162	16.4557	17.2933	20.8269	18.8081	20.9	20.0491	2.25317	0.0111032	1.59788	AT3G01390.4;AT3G01390.3;AT3G01390.2;AT3G01390.1	9;9;9;9	0	2166300	0	146560	4735600	0	2083400	831350	0.84933	7.51048	3.37038e-31	128.35	117.74	69.094	1	MES(0.151)NRGQGS(0.849)IQQLLAAEVEAQHIVNAAR	MES(-7.5)NRGQGS(7.5)IQQLLAAEVEAQHIVNAAR	3	0.17327
AT3G01490.2	45	S	18.0297	17.1519	17.6314	16.4543	18.0589	16.1403	16.749	16.8772	-0.360475	0.586638	0.130203	AT3G01490.2;AT3G01490.1	45;45	229450	277570	0	81931	695220	0	117270	92244	0.952137	12.987	5.61868e-05	80.763	61.492	80.763	1	S(0.048)LS(0.952)DGEDNVNNTR	S(-13)LS(13)DGEDNVNNT(-70)R	2	-0.83858
AT3G01540.1	136	S	18.1491	18.4449	18.7272	16.95	16.3814	18.1675	17.8619	19.4086	-0.11295	0.355138	0.252922	AT3G01540.1;AT3G01540.4;AT3G01540.3;AT3G01540.2	136;136;136;136	249240	680170	0	0	0	460170	253630	0	0.959741	14.035	1.59513e-08	95.767	83.974	85.636	1	VPLPS(0.001)S(0.001)APAS(0.038)ELS(0.96)PEAYS(0.001)R	VPLPS(-33)S(-33)APAS(-14)ELS(14)PEAY(-44)S(-29)R	2	0.3591
AT3G02180.3	73	S	19.6235	19.0033	19.4128	18.6919	18.9986	18.1361	20.8898	20.8201	0.528275	0.121374	0.612932	AT3G02180.3;AT3G02180.2;AT3G02180.1	73;73;73	692590	1001600	0	386390	1333500	450290	0	0	1	74.8032	1.32978e-05	95.358	77.323	95.358	1	GS(1)PNNYFR	GS(75)PNNY(-75)FR	2	0.31674
AT3G02260.2	502	S	16.8918	19.276	19.9257	21.5202	19.2534	19.9135	21.6246	22.009	1.2967	0.072948	0.810734	AT3G02260.2;AT3G02260.3;AT3G02260.4;AT3G02260.1	502;503;512;512	104270	1210000	935390	2744400	1591100	0	3442700	3234200	0.990042	19.9747	3.33608e-93	191.25	185.09	191.25	1	S(0.01)NS(0.99)FAEVESQISHDDEALFGNLFSEGSR	S(-20)NS(20)FAEVES(-100)QIS(-110)HDDEALFGNLFS(-190)EGS(-190)R	3	0.032223
AT3G02830.2	164	S	19.4382	18.0245	18.5921	19.0794	12.8454	13.8343	14.6832	18.0022	-3.94227	2.13921	0.0031636	AT3G02830.2;AT3G02830.1	164;184	609080	0	371150	0	0	0	0	201190	0.999357	31.9137	0.00152872	50.353	25.355	50.353	1	AS(0.001)FIAS(0.999)PR	AS(-32)FIAS(32)PR	2	0.45232
AT3G02830.2	337	S	19.5831	19.6163	19.9095	19.7677	19.5931	19.3489	19.4784	19.287	-0.2923	1.85291	0.00613674	AT3G02830.2;AT3G02830.1	337;357	673450	1531900	924990	814510	2013500	1043700	777720	490170	0.988172	20.1234	2.64195e-113	211.49	189.62	141.86	1	VFTYDNT(0.002)AS(0.988)ET(0.01)DEVVETSTGK	VFT(-56)Y(-47)DNT(-27)AS(20)ET(-20)DEVVET(-59)S(-66)T(-73)GK	2	0.15856
AT3G02880.1	621	S	20.5021	20.7249	20.4896	20.2333	20.9507	20.9524	20.4676	20.395	0.20395	0.0715079	0.818694	AT3G02880.1	621	1273400	3303400	1382800	1124700	5160000	3171600	1543800	1056600	0.99179	21.4103	1.19272e-63	171.21	159.95	105.14	1	LIEEVSHS(0.001)S(0.007)GS(0.992)PNPVSD	LIEEVS(-39)HS(-30)S(-21)GS(21)PNPVS(-57)D	2	-0.035669
AT3G02880.1	626	S	19.1961	19.5768	18.4927	18.8833	19.3931	19.26	18.9638	18.7271	0.048775	0.245946	0.364129	AT3G02880.1	626	515010	1490500	0	441210	1752900	981330	544380	332520	1	69.0719	3.78379e-07	93.494	79.336	86.291	1	LIEEVSHSSGSPNPVS(1)D	LIEEVS(-80)HS(-69)S(-69)GS(-69)PNPVS(69)D	2	-0.093957
AT3G03250.3	412	S	18.2821	20.9828	14.5895	20.0553	21.7561	21.6011	21.0738	21.1608	2.92052	0.0190245	1.36795	AT3G03250.3;AT3G03250.1;AT3G03250.2;AT5G17310.6;AT5G17310.4;AT5G17310.3;AT5G17310.5;AT5G17310.1;AT5G17310.2	412;412;412;279;279;328;333;333;413	273320	3949900	23155	0	9017700	0	2350000	1796500	0.988192	19.2287	0.000235227	64.224	53.005	60.628	1	S(0.988)IPS(0.012)IVELDSLK	S(19)IPS(-19)IVELDS(-53)LK	2	0.28195
AT5G17920.1	702	S	17.6007	17.8308	19.0372	17.4295	17.7418	17.916	17.6294	17.4264	-0.29615	0.63547	0.11435	AT3G03780.3;AT3G03780.2;AT3G03780.1;AT5G20980.2;AT5G20980.1;AT5G17920.1;AT5G17920.2	702;702;702;750;750;702;702	170430	444370	0	161070	558040	386560	215880	134980	0.999503	33.1057	0.000246122	58.071	42.806	56.482	1	YGAGIGPGVYDIHS(1)PR	Y(-51)GAGIGPGVY(-33)DIHS(33)PR	2	-0.12778
AT3G04580.2	635	S	19.9824	19.2896	16.9344	17.7611	18.8394	19.0443	18.7078	18.4504	0.2686	0.192885	0.445364	AT3G04580.2;AT3G04580.1	635;635	0	1221500	0	202700	1194200	845020	455860	274480	0.839674	7.19207	0.000637285	49.638	39.789	44.816	1	SILAGNAPELQHPNS(0.84)NS(0.16)ILR	S(-44)ILAGNAPELQHPNS(7.2)NS(-7.2)ILR	3	0.35376
AT3G04740.1	799	S	17.9235	19.9407	18.68	18.474	19.6765	20.3734	20.905	21.3933	1.8325	0.00379402	2.06058	AT3G04740.1	799	213170	1918100	394470	0	0	2123100	2090600	0	1	81.4746	1.91191e-09	102.38	81.127	98.694	1	LIPSLQVVEGVAS(1)PNK	LIPS(-81)LQVVEGVAS(81)PNK	2	-0.21819
AT3G04840.1	236	S	17.8578	18.32	18.371	18.8025	16.3524	17.8282	17.2949	17.9992	-0.96915	1.52674	0.0131092	AT3G04840.1	236	203680	623750	318410	0	0	363730	0	200760	0.989135	19.5923	0.00121204	65.805	49.173	65.472	1	LMDVHGDY(0.011)S(0.989)AEDVGVK	LMDVHGDY(-20)S(20)AEDVGVK	2	-1.1452
AT3G05090.3	393	S	19.7945	20.1627	20.452	19.7939	19.9067	19.6582	19.4241	19.6209	-0.3983	1.40812	0.0173096	AT3G05090.3;AT3G05090.2;AT3G05090.1	393;393;393	779720	2237300	1347200	829400	2502500	1293200	748980	617830	1	123.146	1.40713e-19	129.38	110.3	129.38	1	ARVS(1)LEGLNPAPAYK	ARVS(120)LEGLNPAPAY(-120)K	2	0.33439
AT3G05090.3	379	S	19.1655	21.0859	19.1646	15.924	21.3522	21.6617	21.0117	20.4027	2.27207	0.0189365	1.36992	AT3G05090.3;AT3G05090.2;AT3G05090.1	379;379;379	504190	4242400	0	0	6815400	5185600	2251000	1062200	1	56.5991	4.01192e-06	94.461	81.583	56.599	2	GGS(1)FLAGNLS(1)FNR	GGS(57)FLAGNLS(57)FNR	2	-1.2078
AT3G05090.3	386	S	19.8982	21.5611	20.8239	20.087	22.1322	22.3743	22.3734	21.1884	1.42453	0.00516262	1.9275	AT3G05090.3;AT3G05090.2;AT3G05090.1	386;386;386	837860	5897700	1743300	1016300	11703000	8497900	5785000	1831200	1	56.5991	1.63954e-09	107.65	92.746	56.599	1;2	GGS(1)FLAGNLS(1)FNR	GGS(57)FLAGNLS(57)FNR	2	-1.2078
AT3G05090.3	190	S	21.163	21.516	21.8044	21.5688	21.4151	21.4977	21.2666	21.2614	-0.15285	0.780984	0.0786169	AT3G05090.3;AT3G05090.2;AT3G05090.1	190;190;190	2013300	5716200	3439900	2838400	7119400	4628200	2686000	1926200	0.997789	27.2659	8.81446e-49	156.73	136.43	142.45	1	TVGS(0.998)S(0.002)NNISVQSSPSHGYTPTIAK	T(-35)VGS(27)S(-27)NNIS(-73)VQS(-100)S(-110)PS(-110)HGY(-130)T(-120)PT(-130)IAK	3	-0.14295
AT3G05200.1	357	S	18.1936	18.6089	18.9548	18.3781	17.6836	16.8044	17.4869	17.8591	-1.07535	2.34665	0.00195917	AT3G05200.1	357	257050	762030	477220	310870	535980	0	195580	182180	1	42.5986	0.00178265	60.59	28.629	42.599	1	NAS(1)FLWR	NAS(43)FLWR	2	0.20535
AT3G05200.1	278	S	20.2211	20.7023	20.5743	20.0381	19.4657	19.8608	19.2833	19.3412	-0.8962	2.66482	0.000940832	AT3G05200.1	278	1048000	3252100	1466400	982430	1843400	1488200	679350	508940	0.999992	50.9663	5.8899e-21	134.68	107.71	130.94	1	TNS(1)LLVLPR	T(-51)NS(51)LLVLPR	2	-0.071537
AT3G05420.1	515	S	21.4898	21.4129	21.858	21.5426	21.5277	21.6701	21.8814	21.9678	0.185925	0.0535453	0.935561	AT3G05420.1;AT3G05420.2	515;516	2525200	5322000	3570100	2787300	7697200	5215600	4113300	3143100	1	42.2093	9.11627e-247	278.27	257.97	42.209	1;2	DIES(1)EVEVS(1)QEGR	DIES(42)EVEVS(42)QEGR	2	0.18578
AT3G05420.1	520	S	16.3917	17.9575	18.8479	18.3831	17.9089	18.1012	18.5398	17.1545	0.03105	0.284344	0.318383	AT3G05420.1;AT3G05420.2	520;521	73722	485170	443140	311950	626580	439500	405760	111790	1	42.2093	0.000156346	72.265	52.158	42.209	1;2	DIES(1)EVEVS(1)QEGR	DIES(42)EVEVS(42)QEGR	2	0.18578
AT3G05420.1	501	S	17.8177	19.4045	19.6247	18.8005	18.8602	19.2273	18.491	17.9246	-0.286075	0.536912	0.149024	AT3G05420.1;AT3G05420.2	501;502	198100	1322700	759280	416620	1211500	959290	392260	190650	0.985485	18.3381	5.16404e-16	113.69	98.809	113.69	1	TLEAPLPGS(0.985)LS(0.014)AVNNATTR	T(-74)LEAPLPGS(18)LS(-18)AVNNAT(-45)T(-45)R	2	0.77416
AT3G05420.1	503	S	20.9768	19.9054	19.8044	20.3566	20.4994	21.5463	22.1417	19.8068	0.73775	0.0593416	0.893758	AT3G05420.1;AT3G05420.2	503;504	0	1871800	859980	1225100	3773800	4786700	0	702790	0.993817	22.1396	5.16051e-52	164.53	146.83	164.53	1	TLEAPLPGS(0.006)LS(0.994)AVNNATTR	T(-120)LEAPLPGS(-22)LS(22)AVNNAT(-44)T(-42)R	2	0.44383
AT3G05900.1	456	S	19.3883	19.1124	19.638	19.2244	19.5249	19.6265	19.9705	19.8785	0.409325	0.00838943	1.71823	AT3G05900.1;AT3G05900.2	456;429	0	1080300	766270	558890	1920600	1265100	1093800	738620	0.966526	14.6061	8.59761e-30	146.96	119.48	115.91	1	ETEEDVS(0.033)S(0.967)PADIIEK	ET(-51)EEDVS(-15)S(15)PADIIEK	2	-0.28596
AT3G05900.1	514	S	14.6431	19.1133	12.7696	14.5929	19.7717	19.8178	19.8567	19.6989	4.50655	0.00341697	2.10585	AT3G05900.1;AT3G05900.2	514;487	0	1081000	0	0	2278900	1444500	1010900	652140	0.999893	39.6864	2.28335e-06	92.265	82.261	69.01	1	ETEGDVPS(1)PADVIEK	ET(-40)EGDVPS(40)PADVIEK	2	0.31208
AT3G05900.1	22	S	18.9925	18.6686	18.6036	18.2181	19.0372	18.3795	18.4706	19.2982	0.175675	0.13765	0.566017	AT3G05900.1	22	447210	794240	374120	278240	1369700	533040	386770	0	1	110.379	1.86664e-10	110.38	87.262	110.38	1	PLENKVS(1)EEAK	PLENKVS(110)EEAK	2	-0.32866
AT3G05900.1	373	S	17.8735	17.395	17.6718	18.8771	18.4135	16.9618	17.4418	17.4121	-0.39705	0.692196	0.0986202	AT3G05900.1;AT3G05900.2	373;346	0	328520	196120	0	888940	199510	189560	133650	1	67.1369	4.71546e-149	234.85	205.31	234.85	1	PSESSAALS(1)PEK	PS(-180)ES(-93)S(-67)AALS(67)PEK	2	0.03938
AT3G05900.1	500	S	20.3432	19.2581	19.2349	19.0185	19.8662	19.186	19.0662	20.6899	0.2384	0.166104	0.497813	AT3G05900.1;AT3G05900.2	500;473	1140600	1195100	579510	484560	2433100	932220	584410	0	0.973156	15.5934	1.29451e-38	149.57	132.13	149.57	1	VVPTNQDS(0.973)DT(0.027)EPK	VVPT(-67)NQDS(16)DT(-16)EPK	2	0.026096
AT3G06380.1	5	S	19.4369	19.9049	19.0163	19.0023	19.9274	19.0228	19.3062	18.8376	-0.0666	0.375738	0.237307	AT3G06380.1	5	608550	1871200	498030	479150	2538500	832530	690210	358980	1	43.0266	0.00981191	43.027	22.125	43.027	2	S(1)LLQEMRS(1)R	S(43)LLQEMRS(43)R	2	-0.5464
AT3G06380.1	12	S	19.4369	19.9049	19.0163	19.0023	19.9274	19.0228	19.3062	18.8376	-0.0666	0.375738	0.237307	AT3G06380.1	12	608550	1871200	498030	479150	2538500	832530	690210	358980	1	43.0266	0.00981191	43.027	22.125	43.027	2	S(1)LLQEMRS(1)R	S(43)LLQEMRS(43)R	2	-0.5464
AT3G06450.4	675	S	18.6553	16.554	17.8266	17.5867	16.2099	16.6961	17.2891	17.3342	-0.773325	1.04778	0.0407592	AT3G06450.4;AT3G06450.3;AT3G06450.2;AT3G06450.1	675;675;675;675	354000	0	218320	179620	0	0	170520	126620	1	48.283	0.000556526	65.305	44.435	48.283	1	VVS(1)FQNPR	VVS(48)FQNPR	2	0.2156
AT3G06550.3	75	S	20.4951	20.6321	20.8935	20.458	19.883	20.0902	21.7647	19.5342	-0.30165	0.543294	0.146438	AT3G06550.3;AT3G06550.1;AT3G06550.2	75;76;76	1267200	3097600	1829500	1314300	2461700	1744700	0	581790	0.998487	28.1946	9.42896e-148	230.82	217.73	230.82	1	ALLIEDGGGLQS(0.002)AS(0.998)PR	ALLIEDGGGLQS(-28)AS(28)PR	2	-0.022243
AT5G49460.2	324	S	16.9119	16.7224	16.3832	16.437	16.8438	16.5603	16.2619	16.3645	-0.106	0.542112	0.146913	AT5G49460.2;AT5G49460.1;AT3G06650.2;AT3G06650.1	324;324;324;324	105730	206100	80277	80956	299450	151050	83666	64653	1	41.2833	0.0328749	41.283	13.954	41.283	1	LVEEGKVS(1)PIK	LVEEGKVS(41)PIK	2	-0.32212
AT3G07030.1	14	S	18.7703	19.0814	20.2459	18.1076	19.1945	18.54	18.3909	18.6379	-0.360475	0.618681	0.119537	AT3G07030.1;AT3G07030.3;AT3G07030.2;AT3G07030.4;AT3G07030.5	14;14;14;14;14	383370	1057300	0	0	1527400	595760	365980	312580	1	43.9912	0.000867642	75.669	53.796	43.991	1	PKPES(1)PINENEIR	PKPES(44)PINENEIR	2	-2.2752
AT3G07330.2	608	S	19.4447	19.1107	18.6345	17.7888	19.2942	15.1782	17.7592	17.9833	-1.19095	0.904796	0.0577488	AT3G07330.2;AT3G07330.1	608;608	611840	1079000	0	206630	1636700	0	236200	198560	0.998345	28.4133	3.81832e-10	109.84	79.514	109.84	1	SSS(0.998)DS(0.001)GLTELSK	S(-45)S(-37)S(28)DS(-28)GLT(-56)ELS(-82)K	2	0.38203
AT3G07360.9	90	S	18.9094	19.014	19.3411	18.4094	18.6411	18.6586	18.9162	19.9272	0.1173	0.20604	0.422787	AT3G07360.9;AT3G07360.8;AT3G07360.7;AT3G07360.6;AT3G07360.5;AT3G07360.4;AT3G07360.3;AT3G07360.2;AT3G07360.10;AT3G07360.1	90;90;90;90;90;90;90;90;90;225	422180	1009100	0	0	1040800	0	526730	0	1	50.1551	4.45529e-07	100.54	84.404	50.155	1	LVNPLLHGS(1)NPDEK	LVNPLLHGS(50)NPDEK	2	-2.5249
AT3G07660.1	554	S	17.814	18.0047	18.125	17.6452	18.2405	18.0069	19.0983	17.9795	0.434075	0.0399214	1.05639	AT3G07660.1	554	197590	501290	268490	187050	788460	411710	0	198040	0.986888	21.6442	1.5908e-08	94.449	84.919	94.449	1	SGPDS(0.007)DGRVS(0.987)PFVS(0.006)PGVASK	S(-68)GPDS(-22)DGRVS(22)PFVS(-22)PGVAS(-52)K	3	-0.19914
AT3G08510.4	280	S	24.2705	23.9084	23.6939	23.4628	23.3587	23.487	23.1144	23.308	-0.516875	1.77612	0.00733384	AT3G08510.4;AT3G08510.3;AT3G08510.2;AT3G08510.1	280;280;280;280	17352000	30011000	12745000	10549000	27386000	18376000	9668400	7958000	1	76.8267	9.64665e-05	88.948	49.405	76.827	1	EVPS(1)FIQR	EVPS(77)FIQR	2	0.047937
AT3G08510.4	346	S	18.2638	18.4372	18.2496	17.99	16.2852	18.6703	18.2257	18.2516	-0.37695	0.591102	0.128654	AT3G08510.4;AT3G08510.3;AT3G08510.2;AT3G08510.1;AT3G55940.1	346;346;346;346;352	269870	676530	292720	237550	0	652050	326370	239150	0.870973	8.29326	1.60997e-07	93.011	26.748	93.011	1	RLS(0.871)LS(0.129)EEQLEK	RLS(8.3)LS(-8.3)EEQLEK	2	0.60434
AT3G08710.3	14	S	21.6016	21.5896	21.8667	21.6622	21.7968	21.8117	21.7248	21.5881	0.050325	0.1434	0.550963	AT3G08710.3;AT3G08710.2;AT3G08710.1	14;14;14	2728600	6015100	3591800	3028300	9275200	5753600	3690300	2415700	1	90.8469	1.54309e-56	169.57	160.97	168.72	1	GDDDS(1)VHNVEFSGGNVHLITTK	GDDDS(91)VHNVEFS(-91)GGNVHLIT(-150)T(-160)K	3	0.168
AT3G08710.3	136	S	21.615	20.5127	21.8139	21.6615	21.7854	21.9041	23.0051	21.5648	0.664075	0.0412049	1.04328	AT3G08710.3;AT3G08710.2;AT3G08710.1	136;136;136	2754100	0	3462700	3026700	9202400	6134000	0	2377000	0.999887	39.4664	1.51039e-127	224.67	174.74	217.39	1	VTSIIDSVPES(1)PQRP	VT(-140)S(-100)IIDS(-39)VPES(39)PQRP	2	0.12348
AT3G08850.1	748	S	16.4884	19.3738	16.7938	17.8263	14.5501	13.7097	18.1556	13.811	-2.56398	1.38084	0.0184564	AT3G08850.1	748	78833	1294900	106710	0	0	0	310890	0	0.945183	15.7045	0.000919409	47.532	33.853	47.532	1	PQSS(0.002)S(0.002)LLT(0.025)S(0.025)LPS(0.945)IAK	PQS(-33)S(-27)S(-27)LLT(-16)S(-16)LPS(16)IAK	2	0.26556
AT3G09200.1	305	S	18.4331	16.9149	20.0348	20.4467	20.7207	20.0328	19.7678	19.0992	0.94775	0.075729	0.795837	AT3G09200.1;AT3G09200.2	305;272	303470	235520	1008900	1304000	4399500	1676700	950450	430360	1	162.178	9.63122e-197	253.99	238.57	253.99	1	VEEKEES(1)DEEDYGGDFGLFDEE	VEEKEES(160)DEEDY(-160)GGDFGLFDEE	2	0.24376
AT3G09560.4	162	S	17.573	18.1876	18.6468	18.0002	18.0093	18.1206	18.1409	18.1124	-0.0061	0.310109	0.292137	AT3G09560.4;AT3G09560.3;AT3G09560.2;AT3G09560.1	162;162;162;162	167190	569030	385490	239230	671720	445460	307750	217160	0.88474	9.34212	8.30601e-17	123.03	113.47	123.03	1	FYDFQDDPPS(0.885)PT(0.103)S(0.012)EYGSAR	FY(-71)DFQDDPPS(9.3)PT(-9.3)S(-19)EY(-59)GS(-45)AR	2	-0.1376
AT3G09560.4	125	S	17.8627	18.0461	18.7654	18.155	16.4045	17.4591	17.431	17.6022	-0.9831	1.86866	0.00591656	AT3G09560.4;AT3G09560.3;AT3G09560.2;AT3G09560.1	125;125;125;125	204370	515880	0	266320	0	281640	188140	152470	0.868594	11.2266	0.00013745	72.265	56.693	72.265	1	LEHSLS(0.869)DS(0.065)GT(0.065)GELR	LEHS(-33)LS(11)DS(-11)GT(-11)GELR	2	0.13692
AT3G09670.2	522	S	17.1208	17.1324	17.1181	16.697	17.2761	16.8918	16.1302	17.0657	-0.176125	0.568281	0.136809	AT3G09670.2;AT3G09670.1	522;522	122200	273850	133610	96946	404070	190070	76367	105120	0.97792	17.1273	0.000217964	57.679	47.156	57.679	1	ANLQT(0.003)EDPGS(0.978)PVS(0.019)PK	ANLQT(-25)EDPGS(17)PVS(-17)PK	2	0.86155
AT3G09670.2	525	S	18.1211	18.3088	17.7511	17.1652	16.2268	17.3394	17.3685	17.2061	-0.80135	1.43268	0.0163399	AT3G09670.2;AT3G09670.1	525;525	244450	618930	207190	134110	0	259210	180160	115860	0.991722	20.94	0.000205075	59.306	51.66	59.306	1	ANLQTEDPGS(0.008)PVS(0.992)PK	ANLQT(-35)EDPGS(-21)PVS(21)PK	2	-0.44567
AT3G10360.1	225	S	18.8819	21.1297	19.4456	20.7594	21.3075	21.6295	21.0035	20.6569	1.0952	0.0231349	1.28504	AT3G10360.1	225	414220	4373400	670600	1619700	6607400	5070900	2238300	1266900	1	84.2893	2.23836e-39	154.36	125.59	84.289	1	S(1)FADILQEGLER	S(84)FADILQEGLER	2	0.31061
AT3G10360.1	60	S	19.3689	19.0327	19.5641	19.7295	18.3953	19.1044	19.6205	20.1108	-0.11605	0.409194	0.214505	AT3G10360.1	60	0	1022200	728040	0	0	880990	858190	0	0.882401	8.75333	0.00016939	71.241	64.346	60.628	1	S(0.118)GS(0.882)APPTVEGLLR	S(-8.8)GS(8.8)APPT(-47)VEGLLR	2	0.40688
AT3G10420.1	447	S	19.5555	15.5588	19.3592	18.9771	16.5993	16.7379	17.2047	18.4218	-1.12173	0.799062	0.0751173	AT3G10420.1;AT3G10420.2	447;447	0	92004	631620	470850	0	170830	160830	269100	0.995031	23.0153	1.14981e-08	97.579	87.527	59.862	1	DFVS(0.005)ELLS(0.995)DDEDEDFLLIR	DFVS(-23)ELLS(23)DDEDEDFLLIR	2	0.62223
AT3G10480.2	382	S	18.8208	18.8644	18.4802	18.2803	18.6639	18.0376	18.0438	17.7076	-0.4982	1.36167	0.0193082	AT3G10480.2;AT3G10480.1;AT3G10480.3	382;383;462	397030	909660	343460	290500	1057400	420570	287710	164030	0.997921	30.1876	2.37146e-09	105.03	92.646	105.03	1	EET(0.001)S(0.001)PPS(0.998)PIASPEEK	EET(-30)S(-30)PPS(30)PIAS(-38)PEEK	2	-0.050501
AT3G10530.1	22	S	19.0399	18.9514	19.4009	19.91	18.9447	18.7279	18.8365	18.9255	-0.4669	1.39012	0.0180578	AT3G10530.1	22	462170	966240	650180	898900	1284600	678630	498400	381530	0.999984	47.959	1.17221e-06	93.823	66.413	93.823	1	VLPPVEQES(1)DVELETK	VLPPVEQES(48)DVELET(-48)K	2	0.65958
AT5G04510.2	382	S	22.2867	22.1308	22.3948	22.1265	22.0202	22.2104	22.2082	22.0986	-0.10035	0.894432	0.059243	AT5G04510.2;AT3G10540.1;AT5G04510.1	382;377;382	4387200	8753000	5179500	4178000	10829000	7584900	5158900	3441300	1	78.7731	9.49853e-65	175.49	144.19	172.21	1	LAS(1)IDSFDSR	LAS(79)IDS(-79)FDS(-130)R	2	0.11586
AT3G10980.1	512	S	17.1466	17.2395	16.926	17.0923	17.813	16.8865	16.9594	16.8321	0.02165	0.272152	0.331966	AT3G10980.1	512	0	294950	116950	127500	586280	189370	135680	89405	0.848472	7.48145	0.000612497	62.463	43.369	62.463	1	FGLGS(0.152)S(0.848)PK	FGLGS(-7.5)S(7.5)PK	2	0.37672
AT3G10980.1	489	S	17.6117	18.1016	17.5006	17.231	18.021	18.512	17.6547	17.6335	0.344075	0.0597311	0.891107	AT3G10980.1	489	171740	536130	174170	140370	677190	584290	219700	155810	0.999996	54.5396	8.10427e-06	98.531	85.764	98.531	1	NMVS(1)PNLVSPLPR	NMVS(55)PNLVS(-55)PLPR	2	0.42045
AT3G10980.1	555	S	17.9397	18.2997	18.594	17.8586	17.709	18.8502	18.1433	17.7037	-0.07145	0.381822	0.232936	AT3G10980.1	555	215580	615010	371630	216870	0	738670	308260	163580	0.984081	18.0337	2.19356e-07	101.3	64.327	84.566	1	SDVALTPPS(0.984)PLS(0.015)IHR	S(-61)DVALT(-33)PPS(18)PLS(-18)IHR	2	0.55181
AT3G11250.1	308	S	18.6998	20.1849	19.9473	19.4553	21.7006	20.7478	21.189	20.2711	1.4053	0.00440385	1.99615	AT3G11250.1	308	365090	2271900	949490	655920	8677400	2752200	2545400	969600	1	134.818	1.07068e-128	221.41	213.09	206.7	1	KEES(1)DEEDYEGGFGLFDEE	KEES(130)DEEDY(-130)EGGFGLFDEE	2	0.046774
AT3G11330.1	22	S	22.7943	21.5699	22.4938	22.0079	13.0321	21.4857	13.0363	14.1687	-6.78578	2.08822	0.00355926	AT3G11330.1;AT5G05850.1	22;22	6237200	5933700	0	3848300	0	4589800	0	0	0.972782	15.5316	0.000813104	66.27	40.711	48.794	1	LPS(0.973)FT(0.027)AK	LPS(16)FT(-16)AK	1	-0.15253
AT3G11820.1	8	S	20.1118	21.4603	21.3179	20.5651	21.3114	21.7103	21.3029	21.1125	0.4955	0.0452554	1.00454	AT3G11820.1	8	971550	5499500	2455200	1415600	6625400	5363100	2754500	1737400	0.992669	24.3355	2.10987e-110	206.32	192.86	206.32	1	MNDLFSS(0.004)S(0.993)FS(0.004)R	MNDLFS(-48)S(-24)S(24)FS(-24)R	2	-0.45661
AT3G12020.4	501	S	19.7278	19.721	20.6542	19.9927	19.8762	20.1256	20.3198	19.8053	0.0078	0.290751	0.311558	AT3G12020.4;AT3G12020.1;AT3G12020.3;AT3G12020.2	501;501;501;501	744510	1647200	1549900	951940	2450000	1788000	1393500	702080	1	89.5975	5.09029e-10	112.3	102.88	106.67	1	RHS(1)FGEEELAYLPYK	RHS(90)FGEEELAY(-90)LPY(-100)K	3	-0.3543
AT3G12100.2	6	S	19.2344	17.5033	17.2726	17.6291	17.9171	17.6561	17.2576	17.5708	-0.30945	0.574384	0.13457	AT3G12100.2;AT3G12100.1	6;6	528850	354120	148710	184970	630150	322830	166830	149190	0.983297	17.6989	0.00579894	43.808	30.771	43.808	1	S(0.017)IS(0.983)FNPR	S(-18)IS(18)FNPR	2	0.77242
AT3G12200.3	362	S	17.5164	16.5691	17.1707	16.2815	15.1031	16.9622	17.1927	16.295	-0.496175	0.700329	0.0965709	AT3G12200.3;AT3G12200.4;AT3G12200.1;AT3G12200.2	362;368;434;444	0	185330	0	72682	0	0	159500	61612	0.848113	7.46932	0.000763456	51.013	35.257	51.013	1	DVDVGVVS(0.152)AQEVACS(0.848)PPR	DVDVGVVS(-7.5)AQEVACS(7.5)PPR	2	0.99453
AT3G12280.2	375	S	17.8818	17.121	16.8919	17.4319	15.8398	16.651	16.9059	17.5251	-0.6012	1.01677	0.0439329	AT3G12280.2;AT3G12280.1	375;375	207100	271690	114220	161340	0	160850	130740	144530	0.887825	8.9843	9.40897e-14	118.4	71.206	118.4	1	IDALS(0.112)S(0.888)PAR	IDALS(-9)S(9)PAR	2	-0.11581
AT3G12280.2	385	S	19.0225	18.8452	18.9144	19.6291	18.8805	19.0517	18.4968	18.5309	-0.362825	1.10434	0.0355721	AT3G12280.2;AT3G12280.1	385;385	456630	897640	464040	0	1228700	849400	393840	290230	0.999939	42.1658	7.14989e-08	93.258	77.876	93.258	1	TFISPLS(1)PHK	T(-88)FIS(-42)PLS(42)PHK	2	0.95386
AT3G12280.2	911	S	18.534	18.8003	18.6248	18.7293	18.4188	18.4653	18.6551	19.9377	0.197125	0.157438	0.517018	AT3G12280.2;AT3G12280.1	911;911	325470	870150	379660	396540	892210	565690	439510	0	0.999798	36.9849	0.000153399	72.496	60.282	72.496	1	VSAVHNVYVS(1)PLR	VS(-58)AVHNVY(-37)VS(37)PLR	2	-0.078823
AT3G12280.2	898	S	17.1268	17.9966	18.343	17.7099	16.2628	17.4811	17.5622	17.9658	-0.4761	0.783433	0.0781326	AT3G12280.2;AT3G12280.1	898;898	122710	498490	312300	195630	0	285950	206060	196170	0.996778	24.925	0.00636482	53.252	45.148	53.252	1	VSVFPS(0.003)VPDMS(0.997)PK	VS(-48)VFPS(-25)VPDMS(25)PK	2	-0.26219
AT3G12480.1	122	S	18.8846	18.7675	19.0386	18.832	11.25	12.501	18.3824	12.9586	-5.10767	2.05008	0.00388734	AT3G12480.1	122	414990	850560	0	425820	0	0	363830	0	0.99996	44.1313	2.51497e-05	86.467	62.042	86.467	1	PISDEVNDS(1)DEEYK	PIS(-58)DEVNDS(44)DEEY(-44)K	2	0.24852
AT3G12580.1	141	S	15.3864	13.4997	11.7512	15.9117	15.9958	16.4173	17.0979	17.3203	2.57058	0.00918626	1.67922	AT3G12580.1	141	0	0	0	0	0	0	149350	125410	1	44.6158	0.00230502	44.616	29.076	44.616	1	EIAEAFLGS(1)PVK	EIAEAFLGS(45)PVK	2	-0.045155
AT3G12590.2	123	S	15.9196	15.5455	19.5395	10.6944	19.7715	11.7258	13.3726	15.1565	-0.41815	0.359883	0.249209	AT3G12590.2;AT3G12590.1	123;212	53148	0	715720	0	2278500	0	0	0	0.811094	7.23021	1.66336e-06	90.731	28.323	85.554	1	QLLPS(0.006)LS(0.811)S(0.153)LLS(0.03)K	QLLPS(-21)LS(7.2)S(-7.2)LLS(-14)K	2	-0.091814
AT3G12590.2	129	S	17.8482	17.9842	18.2114	17.9028	17.9851	18.1132	17.783	18.1124	0.011775	0.267428	0.337452	AT3G12590.2;AT3G12590.1	129;218	202320	494230	285070	223620	660520	443180	240140	217150	0.996413	24.4377	3.97914e-06	87.566	62.63	87.566	1	S(0.996)FNS(0.004)QLSPANAAESPQK	S(24)FNS(-24)QLS(-65)PANAAES(-82)PQK	2	-2.1636
AT3G12640.4	309	S	20.4443	20.133	20.092	19.9244	20.0208	19.9285	20.1642	20.1843	-0.073975	0.542651	0.146696	AT3G12640.4;AT3G12640.1;AT3G12640.3;AT3G12640.2	309;285;309;309	0	2191700	1049700	907960	2708300	1559700	1251000	912970	1	89.4036	2.29368e-13	105.03	96.318	96.679	1	ISHSTGSETLDQNMVLGEVS(1)PK	IS(-92)HS(-92)T(-92)GS(-92)ET(-89)LDQNMVLGEVS(89)PK	3	0.18636
AT3G12780.1	81	S	18.3662	18.2082	17.9413	17.617	16.6157	17.3577	17.6047	17.6864	-0.71705	1.59834	0.0110912	AT3G12780.1	81	289720	577250	236400	183430	0	262520	212220	161630	0.999795	38.6031	0.00300189	43.544	16.871	43.544	1	S(1)VGDLTSADLK	S(39)VGDLT(-39)S(-42)ADLK	2	1.4073
AT3G12780.1	87	S	18.3186	17.9109	18.0099	17.8184	18.358	18.0255	17.8641	17.8896	0.01985	0.261067	0.345046	AT3G12780.1	87	280330	469730	247910	210900	855370	417060	254010	186080	0.850697	7.55819	0.00160078	46.706	42.111	46.706	1	SVGDLT(0.149)S(0.851)ADLK	S(-43)VGDLT(-7.6)S(7.6)ADLK	2	0.63911
AT3G12810.2	905	S	13.7394	12.8337	14.2527	17.869	17.6458	17.9059	18.1838	17.8917	3.2331	0.00588222	1.87118	AT3G12810.2;AT3G12810.1	905;909	0	0	0	218440	522110	383860	0	186350	1	56.2251	2.90738e-05	76.522	62.365	56.225	1	DDLEAIPLS(1)PK	DDLEAIPLS(56)PK	2	-0.52488
AT3G13200.1	113	S	17.7295	18.1224	16.9203	17.098	17.8672	17.0152	17.3521	17.618	-0.004425	0.305477	0.296628	AT3G13200.1	113	186340	543910	116490	128010	608700	0	178130	154150	1	71.1997	2.42555e-05	81.431	70.28	81.431	1	SVDADDS(1)DVDIK	S(-71)VDADDS(71)DVDIK	2	0.042165
AT3G13222.1	161	S	14.178	13.3794	13.4884	14.5254	18.0945	18.8807	17.8465	17.3867	4.1593	1.25947e-05	4.53456	AT3G13222.1	161	0	0	0	0	712570	0	250930	0	1	46.5921	0.00161469	46.592	30.702	46.592	1	IQDAIIS(1)PVDK	IQDAIIS(47)PVDK	2	0.11704
AT3G13224.3	185	S	20.8605	20.2073	20.0581	19.8722	19.9048	19.504	19.6883	19.5367	-0.591075	1.65158	0.00979705	AT3G13224.3;AT3G13224.2	185;194	1632500	2307500	1025300	875680	2499100	1162100	899530	582810	0.999137	31.6217	3.86639e-09	103.5	89.873	103.5	1	S(0.001)LNRS(0.999)PPSYGSHPR	S(-32)LNRS(32)PPS(-38)Y(-66)GS(-72)HPR	3	-0.19662
AT3G13290.1	91	S	13.6769	12.474	13.637	12.1694	16.9422	17.19	17.5748	15.8551	3.9012	7.51394e-05	3.76115	AT3G13290.1	91	0	0	0	0	320590	0	0	45421	0.975265	16.7383	0.0466623	40.589	31.157	40.589	0	TLSY(0.003)PT(0.021)PPLNPQS(0.975)PR	T(-34)LS(-34)Y(-25)PT(-17)PPLNPQS(17)PR	2	-0.011741
AT3G13300.3	1193	S	19.0939	14.9863	19.2356	19.7234	13.3641	15.5877	16.9637	17.6971	-2.35665	1.1069	0.0353543	AT3G13300.3;AT3G13300.1;AT3G13300.2	1193;1193;1158	0	61869	0	789890	0	76974	0	162840	0.947695	15.0462	4.49967e-06	55.3	50.034	55.3	1	NLLALAAAGANS(0.008)GGS(0.008)NS(0.008)LVT(0.03)QLS(0.948)GGPLGALLEK	NLLALAAAGANS(-21)GGS(-21)NS(-21)LVT(-15)QLS(15)GGPLGALLEK	3	0.018726
AT3G13300.3	98	S	17.8151	17.257	19.974	19.1438	16.4056	19.7111	19.4687	19.0917	0.1218	0.261832	0.344119	AT3G13300.3;AT3G13300.1;AT3G13300.2	98;98;63	197740	0	967250	528540	0	1341500	772480	428110	0.997759	26.7008	6.11123e-05	77.912	58.334	77.912	1	TLSYPT(0.002)PPLNLQS(0.998)PR	T(-63)LS(-45)Y(-41)PT(-27)PPLNLQS(27)PR	2	0.67173
AT3G13300.3	660	S	25.8572	22.7227	18.2957	18.2473	22.3308	20.8898	23.5167	22.3022	0.97915	0.164201	0.501925	AT3G13300.3;AT3G13300.1;AT3G13300.2	660;660;625	0	13193000	302220	283930	13430000	3036800	0	0	0.999993	51.6828	3.63433e-11	98.74	84.127	98.74	1	TSGLPSQTSGAGSAYATLPQLPLS(1)PR	T(-90)S(-90)GLPS(-90)QT(-82)S(-80)GAGS(-71)AY(-69)AT(-52)LPQLPLS(52)PR	2	-0.49956
AT3G13300.3	827	S	19.6166	20.1356	19.823	19.4801	19.9033	19.4339	19.3791	19.4484	-0.22265	0.854446	0.0654081	AT3G13300.3;AT3G13300.1;AT3G13300.2	827;827;792	689270	2195600	871160	667300	2496500	1107000	725980	548210	0.994361	25.7985	6.76476e-05	89.624	71.528	73.91	1	VFCS(0.003)QVS(0.994)NLS(0.003)TEMAR	VFCS(-26)QVS(26)NLS(-26)T(-34)EMAR	2	-0.7205
AT3G13530.1	776	S	18.2499	17.1782	18.2828	18.1556	18.1463	18.091	17.8532	18.0365	0.065125	0.228617	0.387982	AT3G13530.1	776	267280	0	299530	266430	738630	436420	252100	206020	0.997872	26.7113	1.71504e-05	88.087	59.281	88.087	1	LAS(0.002)IS(0.998)GGLDGQAPR	LAS(-27)IS(27)GGLDGQAPR	2	1.4196
AT3G13530.1	788	S	17.1834	21.6424	18.0615	19.6697	21.743	21.5358	20.6844	20.3257	1.93298	0.0249424	1.25325	AT3G13530.1	788	127620	6239300	256940	761030	8935900	4752100	1794100	1007000	0.999997	57.9322	8.73467e-17	93.505	85.325	93.505	1	VRS(1)GQLDPNNPIFGQNETSSLSMIDQPDVLK	VRS(58)GQLDPNNPIFGQNET(-58)S(-62)S(-62)LS(-66)MIDQPDVLK	3	-0.044781
AT3G13810.6	70	S	16.6985	16.671	17.1518	16.9104	16.3395	16.8301	16.4477	16.2922	-0.38055	1.51602	0.0134423	AT3G13810.6;AT3G13810.5;AT3G13810.4;AT3G13810.1	70;84;89;89	91194	198890	136760	112400	211120	182110	95166	61493	0.859046	7.84941	0.000755001	51.147	37.241	51.147	1	NQPGNPDPES(0.141)EVIALS(0.859)PK	NQPGNPDPES(-7.8)EVIALS(7.8)PK	2	0.39816
AT3G13910.1	60	S	19.2861	19.3321	19.3861	19.4704	18.9815	19.1426	19.1117	19.1972	-0.260425	2.595	0.00110495	AT3G13910.1;AT3G13910.2	60;60	548160	1258000	643540	662820	1317800	904630	603160	460600	0.988522	19.9035	3.07632e-05	69.721	44.866	60.255	1	S(0.001)WS(0.989)FS(0.01)DPESR	S(-29)WS(20)FS(-20)DPES(-36)R	2	0.056843
AT3G14100.1	237	S	18.0231	18.4931	18.437	17.542	18.4859	17.9551	17.7702	17.9251	-0.089725	0.425449	0.204432	AT3G14100.1	237	228410	703280	0	174140	934640	397180	0	190720	0.999999	60.3518	4.44991e-05	82.55	52.491	82.55	1	S(1)VVELTTGSSEDGK	S(60)VVELT(-60)T(-69)GS(-75)S(-79)EDGK	2	-0.30377
AT3G14100.1	246	S	21.8052	21.664	21.7123	21.521	21.2165	20.9474	21.0467	21.1061	-0.59645	3.77215	7.3402e-05	AT3G14100.1	246	3142100	6333500	3227200	2745900	6203800	3160500	2306300	1729700	0.987086	18.833	1.66103e-219	268.9	244.87	225.32	1	SVVELTTGS(0.013)S(0.987)EDGK	S(-200)VVELT(-87)T(-63)GS(-19)S(19)EDGK	2	0.92992
AT3G14172.2	15	S	17.9084	20.5538	17.006	21.9394	13.7527	11.2152	20.2044	13.7835	-4.61295	1.37414	0.0187492	AT3G14172.2;AT3G14172.1	15;15	210950	2934000	123620	0	0	0	1286400	0	0.998137	27.2903	0.000129756	68.83	54.411	68.83	1	PAIPLDY(0.002)AVFQLS(0.998)PK	PAIPLDY(-27)AVFQLS(27)PK	2	3.8219
AT3G14350.2	329	S	18.8576	18.1418	18.1069	18.227	18.248	18.5882	18.1779	18.2246	-0.02365	0.34207	0.263536	AT3G14350.2;AT3G14350.3;AT3G14350.1	329;366;366	407300	551260	265150	279950	792590	616010	315730	234720	0.813027	9.42655	0.00418381	49.606	28.372	49.606	1	LDT(0.093)S(0.093)LS(0.813)MNLRPPPS(0.001)ER	LDT(-9.4)S(-9.4)LS(9.4)MNLRPPPS(-28)ER	3	-0.33902
AT3G14840.2	831	S	19.6876	19.8003	19.5461	19.8276	19.4781	19.5772	19.8919	19.3032	-0.1528	0.803918	0.0742064	AT3G14840.2;AT1G53440.1	831;826	724070	1740300	0	0	1859300	1222600	0	495710	0.97245	15.4812	4.17622e-40	157.86	110.58	157.86	1	LDEEENTHIS(0.972)T(0.028)R	LDEEENT(-46)HIS(15)T(-15)R	2	-0.012136
AT3G14840.2	1013	S	17.4602	16.5069	17.2467	17.2037	17.7603	18.7192	17.27	17.4329	0.691225	0.027444	1.21299	AT3G14840.2	1013	154610	0	0	137740	565220	0	168280	135590	0.999931	41.8903	0.00020331	70.977	38.969	70.977	1	LDS(1)AYWNTR	LDS(42)AY(-42)WNT(-54)R	2	-2.0319
AT3G15040.1	147	S	22.072	20.5296	20.9383	20.3637	20.781	20.3544	20.789	20.412	-0.3918	0.735846	0.0881603	AT3G15040.1	147	0	2885200	1887200	1231100	4587100	2095300	1929000	1069100	0.999461	32.678	1.76344e-14	116.24	78.894	89.629	1	LPFS(0.001)AS(0.999)FVGGGK	LPFS(-33)AS(33)FVGGGK	2	0.34385
AT3G15040.1	214	S	17.1684	19.4583	17.7464	16.9408	13.5063	20.7833	12.8815	13.3984	-2.6861	0.955625	0.05098	AT3G15040.1	214	126300	1373000	206520	114790	0	2820700	0	0	0.983563	17.7856	1.13716e-11	95.347	63.958	95.347	1	SLAQSSLLS(0.016)CS(0.984)VLEGAGR	S(-74)LAQS(-49)S(-43)LLS(-18)CS(18)VLEGAGR	2	-2.5755
AT3G15450.1	218	S	21.8254	22.1548	22.8077	22.1519	20.4241	20.6443	20.6605	20.135	-1.76897	3.79826	6.90583e-05	AT3G15450.1	218	3186400	8900000	6895700	4252000	3582000	2561600	1764700	882330	1	125.65	9.25666e-64	177.38	158.75	177.38	1	IDS(1)EGVLCGASFK	IDS(130)EGVLCGAS(-130)FK	2	-0.43631
AT3G15450.1	243	S	20.5615	18.2995	19.9659	19.7405	18.334	18.911	17.965	17.9122	-1.3613	1.66746	0.00944139	AT3G15450.1	243	1326900	0	0	799270	841260	770440	272410	189020	0.999942	42.3818	0.00403245	42.913	21.04	42.382	1	RGS(1)EANWALANSR	RGS(42)EANWALANS(-42)R	3	0.26946
AT3G15570.1	6	S	17.3172	17.9067	18.5229	18.468	15.9609	16.9788	17.5719	17.6743	-1.00722	1.38437	0.0183037	AT3G15570.1	6	140020	468380	0	0	0	0	207450	160280	0.985958	19.4548	0.00074828	53.252	32.022	44.309	1	T(0.011)LS(0.986)PEPVT(0.002)IYGNR	T(-19)LS(19)PEPVT(-26)IY(-34)GNR	2	2.5401
AT3G15770.2	114	S	17.9092	19.6125	17.4151	16.8777	19.6899	19.9831	18.8302	19.835	1.63093	0.00986813	1.64847	AT3G15770.2;AT3G15770.1	114;115	211060	1527900	164150	0	2153300	0	0	716650	0.993942	22.8705	0.000573654	50.144	41.956	50.144	1	S(0.994)VGREPILNENVT(0.005)Y(0.001)ESLLGSNK	S(23)VGREPILNENVT(-23)Y(-31)ES(-43)LLGS(-50)NK	3	-0.047087
AT3G15880.3	288	S	19.5828	19.6316	19.5554	19.4047	19.5326	19.5361	19.2949	19.6255	-0.04635	0.515855	0.157947	AT3G15880.3;AT3G15880.4;AT3G15880.1;AT3G15880.2	288;288;288;288	673300	1548200	723660	633290	1930800	1188300	684840	619810	0.932467	12.3791	5.1571e-09	91.729	77.875	88.872	1	PRS(0.932)PPT(0.054)NS(0.013)LSMDYQTADSESVLK	PRS(12)PPT(-12)NS(-18)LS(-37)MDY(-65)QT(-77)ADS(-85)ES(-85)VLK	3	0.96091
AT3G16060.1	594	S	18.7537	22.4719	19.836	22.1448	23.0643	22.8839	22.7812	22.4005	1.98087	0.0160545	1.44019	AT3G16060.1	594	379000	11088000	879030	4231100	22330000	12098000	7674800	4242400	0.997807	26.5801	4.77509e-152	229.67	221.07	180.42	1	S(0.002)NS(0.998)DDNLNALLQEEEDLVNAHR	S(-27)NS(27)DDNLNALLQEEEDLVNAHR	3	-0.29288
AT3G16310.1	80	S	18.172	17.3386	17.878	18.7035	17.6338	16.5338	18.1335	18.0826	-0.4271	0.702485	0.0960358	AT3G16310.1	80	253240	0	0	389510	517780	0	306160	212710	0.996907	25.085	1.22222e-08	97.284	83.027	87.85	1	SDFSPESGIADYS(0.003)AS(0.997)PDAK	S(-85)DFS(-75)PES(-61)GIADY(-62)S(-25)AS(25)PDAK	2	-0.36792
AT3G16810.1	460	S	14.3945	20.8153	14.7939	12.5904	20.5118	18.2706	20.4719	20.3911	4.26282	0.0138555	1.50308	AT3G16810.1	460	0	3516900	0	0	3806400	0	1548400	1053700	0.938205	12.6041	2.52777e-06	74.206	64.985	74.206	1	DEQEDT(0.01)VAEHS(0.938)DHEENVT(0.052)AMGGK	DEQEDT(-20)VAEHS(13)DHEENVT(-13)AMGGK	3	0.0138
AT3G17160.1	20	S	17.9342	18.2059	18.8474	18.3274	17.6692	18.0938	17.9779	19.2609	-0.078275	0.371421	0.240473	AT3G17160.1	20	214760	576310	443010	300130	530640	437250	274870	0	0.986096	18.5076	5.00231e-05	81.431	74.458	81.431	1	PLVQVLS(0.986)DDDS(0.014)EVK	PLVQVLS(19)DDDS(-19)EVK	2	0.19286
AT3G17650.2	25	S	18.7322	18.0035	17.5521	16.9265	18.1087	17.6306	17.4227	17.0536	-0.249675	0.529881	0.151935	AT3G17650.2;AT3G17650.1	25;25	0	500890	180500	113660	719640	317180	187060	104240	0.959029	13.9059	1.76349e-06	85.518	72.963	81.574	1	QIVEHELQET(0.002)GFS(0.959)PET(0.039)EK	QIVEHELQET(-27)GFS(14)PET(-14)EK	3	-0.1098
AT3G17750.1	1137	S	16.3367	15.5589	15.8879	16.5427	12.704	12.6675	12.6903	13.7916	-3.1182	4.22618	2.56241e-05	AT3G17750.1	1137	70965	0	0	87109	0	0	0	0	0.998891	31.7163	0.00129379	47.288	47.288	47.288	1	HPWLTYPY(0.001)EPIS(0.999)A	HPWLT(-35)Y(-41)PY(-32)EPIS(32)A	2	-0.34206
AT3G17750.1	664	S	16.7626	18.3446	18.4483	17.8183	19.0359	18.2193	18.2415	17.9625	0.52135	0.0683062	0.83703	AT3G17750.1	664	95332	634490	335940	210890	1368400	477020	329970	195720	0.998762	29.0663	2.57488e-07	100.41	86.694	100.41	1	NFADGGFS(0.001)FPS(0.999)PVADR	NFADGGFS(-29)FPS(29)PVADR	2	-0.82531
AT3G17750.1	240	S	18.6363	18.5999	20.0382	18.1252	18.5032	17.8878	17.692	17.7029	-0.903425	1.32688	0.0209577	AT3G17750.1	240	349370	757310	0	0	945910	379090	225460	163490	0.999998	58.0885	6.86447e-05	79.148	66.381	79.148	1	SEENIGAS(1)PDHWK	S(-58)EENIGAS(58)PDHWK	2	-1.3936
AT3G17840.1	367	S	16.7449	19.7828	20.742	21.3912	20.2644	21.2424	20.4445	20.0943	0.846175	0.112007	0.643339	AT3G17840.1;AT1G48480.1	367;373	94175	1719300	1647100	2509700	3206600	3877700	1519300	857810	1	99.4509	1.19103e-76	186.97	165.13	99.451	1	VFDLEDLLRAS(1)AEVLGK	VFDLEDLLRAS(99)AEVLGK	2	0.11661
AT3G17840.1	331	S	19.4942	19.5125	19.3132	19.0179	19.024	19.2536	18.8002	18.3598	-0.47505	1.41712	0.0169477	AT3G17840.1	331	633190	1425600	611800	484380	1357200	976950	486010	257780	0.898996	9.49428	1.19001e-06	90.926	68.451	90.926	1	SYVNEYS(0.899)PS(0.101)AVK	S(-87)Y(-87)VNEY(-58)S(9.5)PS(-9.5)AVK	2	1.5374
AT3G17850.1	663	S	19.9005	19.2943	19.1836	18.7517	18.7439	18.6538	18.5167	18.3889	-0.7067	1.82668	0.00652144	AT3G17850.1	663	839190	1225500	559240	402770	1117700	644650	399320	263020	1	103.903	3.25805e-13	117.93	104.25	117.93	1	DSLAAAES(1)PDGMK	DS(-100)LAAAES(100)PDGMK	2	-0.095593
AT3G17850.1	219	S	13.9855	13.6815	12.7149	11.9958	16.5127	19.2565	18.5731	17.5175	4.87052	0.000142472	3.48385	AT3G17850.1	219	0	0	0	0	0	0	415240	143770	0.98246	18.0266	0.000185638	66.435	45.533	55.452	1	S(0.002)LS(0.982)PT(0.015)LPPSGSR	S(-27)LS(18)PT(-18)LPPS(-41)GS(-41)R	2	0.85152
AT3G17850.1	744	S	18.1153	17.4956	18.6108	18.6741	20.5543	19.8765	21.6817	22.4258	2.91063	0.000792876	2.73896	AT3G17850.1	744	243470	0	0	381670	3920200	1504500	0	0	0.999053	30.2323	0.00100409	50.883	47.103	50.883	1	S(0.999)PIPT(0.001)PRPDPIEQILGGK	S(30)PIPT(-30)PRPDPIEQILGGK	3	0.16857
AT3G17850.1	682	S	19.1109	19.5927	19.4846	19.5543	19.8558	19.7527	19.4293	19.7452	0.260125	0.0270704	1.21875	AT3G17850.1	682	485480	1507000	689010	702510	2415700	1380800	751710	673440	1	73.4127	2.36477e-63	174.59	154.48	124.35	1	VSNSHLTEESDVLS(1)PR	VS(-120)NS(-110)HLT(-100)EES(-73)DVLS(73)PR	3	0.061369
AT3G17900.2	209	S	19.2495	18.539	18.8709	18.9428	18.5331	18.718	18.7361	20.4445	0.207375	0.178859	0.471639	AT3G17900.2;AT3G17900.1	209;209	0	726010	450260	0	965760	673970	464900	0	0.999655	34.6232	5.7767e-05	66.621	31.11	55.401	1	DLS(1)DGESILR	DLS(35)DGES(-35)ILR	2	-0.34872
AT3G18230.1	41	S	20.3326	19.9741	19.7584	19.7294	19.8993	19.2908	19.3413	19.1553	-0.52695	1.60401	0.0109455	AT3G18230.1	41	1132200	1963100	832990	793140	2489600	1002500	707220	447420	1	196.907	4.70122e-128	222.29	173.72	222.29	1	SVAVQQPIDGS(1)PR	S(-200)VAVQQPIDGS(200)PR	2	0.90759
AT3G18370.1	806	S	18.402	18.2404	17.631	17.4611	15.1915	16.7942	17.2014	16.7701	-1.44432	1.86018	0.00603412	AT3G18370.1	806	0	590250	190650	164640	0	177630	0	85646	0.880804	8.70148	0.000335957	60.628	45.962	60.628	1	EILNS(0.119)S(0.881)PAQAPSR	EILNS(-8.7)S(8.7)PAQAPS(-33)R	2	-0.86086
AT3G18640.3	118	S	19.8863	18.423	18.7495	19.2041	17.4608	18.3383	18.6624	18.6461	-0.788825	1.25045	0.025109	AT3G18640.3;AT3G18640.2;AT3G18640.1	118;118;118	830960	0	413930	551110	0	0	441740	314350	0.999226	31.4416	4.46257e-06	96.171	71.277	96.171	1	TQVS(0.999)PT(0.001)PIR	T(-42)QVS(31)PT(-31)PIR	2	-0.15991
AT3G19240.1	625	S	17.0971	18.1735	18.6962	18.3621	17.6385	17.8455	18.8212	17.7777	-0.0615	0.350108	0.25694	AT3G19240.1	625	120210	563500	398930	307450	519480	368130	0	172190	1	64.5596	0.00020037	68.809	53.549	68.809	1	S(1)PEAPLVVATPLK	S(65)PEAPLVVAT(-65)PLK	2	0.57338
AT3G19420.1	509	S	21.8488	21.914	20.9344	20.8824	21.9322	21.0775	21.2395	20.8716	-0.1147	0.418476	0.208679	AT3G19420.1	509	3238500	7531700	1882100	1763800	10188000	3458900	2636100	1470200	1	141.568	6.48338e-194	257.54	239.73	251.05	1	DDVFS(1)DNEGDSTGPTK	DDVFS(140)DNEGDS(-140)T(-150)GPT(-170)K	2	-0.43522
AT3G19770.2	194	S	20.1987	19.8269	19.7012	20.7646	19.8766	19.1384	19.2633	20.9173	-0.32395	0.587249	0.12999	AT3G19770.2;AT3G19770.1	194;330	1031900	1772700	800580	0	2450800	902010	669970	0	0.999952	43.2174	9.74005e-65	174.39	111.3	93.258	1	AES(1)ISDLENK	AES(43)IS(-43)DLENK	2	0.18826
AT3G19820.3	2	S	20.7331	20.2339	17.849	19.0041	19.7556	19.2571	19.674	21.5069	0.593375	0.123436	0.606599	AT3G19820.3;AT3G19820.2;AT3G19820.1	2;2;2	1494500	2350400	0	479750	2253600	979330	0	0	1	84.7937	1.41578e-29	141.71	129.44	138.99	1	S(1)DLQTPLVRPK	S(85)DLQT(-85)PLVRPK	2	-0.19837
AT3G19960.5	14	S	17.2185	16.0929	15.8388	16.1553	15.9042	14.0175	15.5193	13.9545	-1.4775	1.63679	0.0101406	AT3G19960.5;AT3G19960.4;AT3G19960.1;AT3G19960.2;AT3G19960.3	14;14;14;14;14	130770	133220	0	66594	156130	0	0	0	0.999977	46.4284	0.00380133	50.04	16.131	50.04	1	S(1)LPADYR	S(46)LPADY(-46)R	2	0.39836
AT3G19960.5	1018	S	19.7311	19.6427	20.8399	19.5729	19.7292	19.9854	20.9215	21.4384	0.571975	0.0694687	0.830267	AT3G19960.5;AT3G19960.4;AT3G19960.1;AT3G19960.2;AT1G50360.1	1018;1018;1018;1028;1010	746230	1560200	0	711630	2212800	1622500	0	0	0.994549	22.7511	4.53487e-11	108.56	48.309	108.56	1	SLQSS(0.005)LS(0.995)IAK	S(-80)LQS(-38)S(-23)LS(23)IAK	2	0.046584
AT3G20250.1	98	S	16.8928	16.3447	17.4297	16.021	17.3649	17.2187	17.829	17.6249	0.837325	0.0105947	1.61799	AT3G20250.1;AT3G20250.3;AT3G20250.2	98;98;98	104340	158630	0	60678	429740	238400	247910	154890	0.99942	32.36	0.000264411	62.924	48.257	62.924	1	AIENY(0.001)DS(0.999)EEEIR	AIENY(-32)DS(32)EEEIR	2	0.48899
AT3G20250.1	62	S	17.9943	18.0115	18.5758	18.0372	17.964	18.1758	17.8897	18.0491	-0.13505	0.685431	0.100362	AT3G20250.1;AT3G20250.3;AT3G20250.2	62;62;62	223890	503670	0	245440	650940	462840	258560	207830	0.96617	14.6325	0.00142989	63.894	53.54	56.599	1	S(0.033)ES(0.966)APPS(0.001)MEGSFAALR	S(-15)ES(15)APPS(-32)MEGS(-48)FAALR	2	-0.18684
AT3G20550.1	133	S	20.8703	20.5421	20.4116	20.2173	20.9341	20.1411	20.0855	20.1024	-0.19455	0.635993	0.114192	AT3G20550.1	133	1643600	2910300	1310000	1112300	5100700	1807300	1184600	862610	1	186.131	5.53132e-93	203.27	189.04	203.27	1	GGS(1)EEPNVEEDSVAR	GGS(190)EEPNVEEDS(-190)VAR	2	0.0098803
AT3G20740.1	273	S	14.0049	13.1553	14.9147	10.6491	17.6467	17.9861	18.8314	19.1447	5.22123	0.000391476	3.04535	AT3G20740.1	273	0	0	0	0	522440	405810	0	0	0.999994	52.5286	6.96042e-05	78.653	58.866	78.653	1	ENS(1)PGEGASDVLLR	ENS(53)PGEGAS(-53)DVLLR	2	0.29681
AT3G21670.1	581	S	19.8694	19.5904	20.6164	20.7828	19.5716	12.925	14.7326	15.6159	-4.50348	2.00056	0.0043591	AT3G21670.1	581	821260	1504600	0	0	1983800	0	0	0	0.991852	20.8541	4.273e-50	168.02	99.359	132.79	1	KES(0.992)S(0.008)EFELK	KES(21)S(-21)EFELK	2	0.64909
AT3G21810.2	235	S	16.9797	17.0394	17.493	15.8952	16.6347	16.6133	16.8311	16.978	-0.08755	0.392143	0.225757	AT3G21810.2;AT3G21810.1	235;259	110820	256740	173250	0	259060	156700	124140	98921	0.913908	10.2594	0.000222271	57.136	43.708	48.625	1	DVGLDIVS(0.914)DEET(0.086)NGR	DVGLDIVS(10)DEET(-10)NGR	2	-1.4009
AT3G22190.4	42	S	21.2898	21.1992	21.4594	21.2638	20.9437	21.2378	21.1637	21.2074	-0.1649	1.27656	0.0236032	AT3G22190.4;AT3G22190.3;AT3G22190.2;AT3G22190.1	42;42;42;42	2198200	4589100	2708200	2297600	5135000	3865300	2501200	1855500	1	79.8202	4.11891e-06	96.64	96.64	79.82	1	NS(1)VDFDFEK	NS(80)VDFDFEK	2	0.15368
AT3G22380.1	32	S	17.9634	18.0931	18.204	17.7872	17.8667	17.8959	18.2507	18.1258	0.02285	0.246036	0.364011	AT3G22380.1;AT3G22380.3;AT3G22380.2	32;32;32	219150	532980	283600	206400	608490	381220	332080	219180	0.888186	9.00008	0.00261166	57.136	42.675	40.515	1	AGS(0.112)FRDS(0.888)PEEEGPVELPEAAR	AGS(-9)FRDS(9)PEEEGPVELPEAAR	2	1.2346
AT3G22850.1	215	S	22.0519	22.3686	22.3806	21.9238	21.6117	21.8606	21.5271	21.4651	-0.5651	2.41291	0.00168136	AT3G22850.1	215	3728100	10322000	5128600	3630400	8158600	5952000	3217600	2218400	0.999428	32.426	8.09654e-128	219.35	197.32	151.44	1	VDS(0.999)S(0.001)GEVCGVTFK	VDS(32)S(-32)GEVCGVT(-110)FK	2	-0.037678
AT3G22850.1	240	S	20.9493	19.404	19.0472	19.3053	18.8989	18.4825	18.3951	18.6674	-1.06548	1.57073	0.0118291	AT3G22850.1	240	0	1322300	508810	0	1244500	572480	367040	319030	1	82.4448	1.41435e-13	115.18	101.41	115.18	1	VGS(1)VQNWSK	VGS(82)VQNWS(-82)K	2	0.31401
AT3G23310.1	285	S	19.8937	19.2388	19.8172	20.051	18.5382	18.0937	19.767	18.1988	-1.10075	1.69197	0.00891797	AT3G23310.1	285	835230	1179200	867640	0	969190	0	0	230560	0.895005	9.30656	0.00029201	55.985	47.697	55.985	1	DFVVAHNLS(0.895)GALQS(0.105)DGRPVAPR	DFVVAHNLS(9.3)GALQS(-9.3)DGRPVAPR	3	0.44966
AT3G23310.1	320	S	17.9836	19.219	18.5478	20.56	13.3788	11.782	20.464	12.6906	-4.49875	1.44263	0.0159631	AT3G23310.1;AT1G03920.2;AT4G14350.3;AT4G14350.4;AT4G14350.2;AT4G14350.1;AT1G03920.3;AT1G03920.1	320;221;317;317;317;317;334;334	222240	1163100	0	0	0	0	1540000	0	0.916237	10.3896	1.02385e-65	176.21	155.37	171.71	1	MLAYS(0.916)T(0.084)VGTPDYIAPEVLLK	MLAY(-66)S(10)T(-10)VGT(-61)PDY(-110)IAPEVLLK	2	-0.12381
AT3G23900.2	747	S	18.801	18.3705	18.4037	18.2111	18.3043	18.0738	17.9565	18.0586	-0.348275	1.57247	0.0117814	AT3G23900.2;AT3G23900.4;AT3G23900.3;AT3G23900.1	747;747;747;747	391620	645980	325710	276890	824130	431230	270810	209200	0.999593	33.9048	0.038055	50.108	29.319	50.108	0	S(1)LDEDYDMK	S(34)LDEDY(-34)DMK	2	0.5075
AT3G23920.1	55	S	18.5795	18.6455	18.9996	18.6719	18.4855	18.6893	18.6055	18.7647	-0.087875	0.638406	0.113469	AT3G23920.1	55	335900	781610	492290	381080	934400	660710	424670	341290	0.999852	38.3887	4.95765e-08	96.163	83.603	95.347	2	AHGTDPS(1)PPMS(0.999)PILGAT(0.001)R	AHGT(-38)DPS(38)PPMS(30)PILGAT(-30)R	2	-1.5397
AT3G23920.1	59	S	18.5795	18.6455	18.9996	18.6719	18.4855	18.6893	18.6055	18.7647	-0.087875	0.638406	0.113469	AT3G23920.1	59	335900	781610	492290	381080	934400	660710	424670	341290	0.999879	39.2046	4.95765e-08	96.163	83.603	96.163	2	AHGT(0.001)DPS(0.999)PPMS(1)PILGATR	AHGT(-30)DPS(30)PPMS(39)PILGAT(-39)R	2	-1.3547
AT3G23920.1	31	S	19.2939	18.3461	18.7257	18.1057	19.0569	18.5757	18.5097	18.6131	0.071	0.226604	0.390903	AT3G23920.1	31	551140	635130	407160	257390	1388500	610690	397390	307260	0.981187	17.7311	6.36542e-22	134.37	116.45	101.15	1	SGEMTDSSLLS(0.002)IS(0.981)PPS(0.017)AR	S(-91)GEMT(-79)DS(-66)S(-58)LLS(-26)IS(18)PPS(-18)AR	2	-0.94067
AT3G24080.4	178	S	18.531	18.4195	18.4245	18.0814	18.5734	17.7657	17.8711	17.765	-0.3703	1.15436	0.0315577	AT3G24080.4;AT3G24080.3;AT3G24080.2;AT3G24080.1	178;178;178;178	324790	668290	330440	253090	993120	348320	255260	170680	1	52.2654	7.90205e-06	89.959	71.179	52.265	1	AEGNES(1)GEDDDFLR	AEGNES(52)GEDDDFLR	2	0.29744
AT3G24550.1	223	S	20.7481	21.1812	21.0985	20.7308	20.9333	21.312	20.7833	20.7439	0.003475	0.294429	0.307733	AT3G24550.1	223	1510100	4532300	2108800	1587900	5098100	4069400	1921500	1345600	1	73.9612	8.22147e-13	107.88	98.935	105.32	1	PSDNHVVTSLPPPKPPS(1)PPR	PS(-96)DNHVVT(-79)S(-74)LPPPKPPS(74)PPR	3	-0.10743
AT3G25150.1	204	S	21.3175	21.2037	22.0392	20.8749	19.8201	20.9764	20.2314	20.8099	-0.899375	1.62371	0.0104541	AT3G25150.1;AT3G25150.2	204;303	0	4603400	0	1754700	0	3224700	0	1408600	0.843168	7.47698	1.13678e-27	113.65	108.38	113.65	1	VFT(0.151)PS(0.843)EDEQVS(0.006)AAEEALVTETVNEAPIEVQK	VFT(-7.5)PS(7.5)EDEQVS(-21)AAEEALVT(-71)ET(-78)VNEAPIEVQK	3	-0.38933
AT3G25690.3	258	S	18.7297	18.9509	19.2997	19.1879	19.3849	19.6389	19.8054	20.139	0.7	0.0029611	2.16783	AT3G25690.3;AT3G25690.6;AT3G25690.4;AT3G25690.2;AT3G25690.1;AT3G25690.5	258;399;399;399;399;401	372740	965860	606100	544960	1743000	1276000	975580	884770	1	63.3402	2.07805e-10	110.86	78.131	103.34	1	LMLEYAGS(1)ER	LMLEY(-63)AGS(63)ER	2	-0.24589
AT3G25690.3	331	S	20.583	18.48	18.8932	19.2688	18.169	19.1151	19.3255	19.6513	-0.241025	0.468862	0.18028	AT3G25690.3;AT3G25690.6;AT3G25690.4;AT3G25690.2;AT3G25690.1;AT3G25690.5	331;472;472;472;472;474	1346800	0	0	576380	0	887540	699480	0	1	69.7489	4.71535e-14	121.6	30.516	121.6	1	SFYGGS(1)PGR	S(-78)FY(-70)GGS(70)PGR	2	-0.099947
AT3G26560.1	411	S	21.4442	21.1522	20.8153	20.8397	20.7171	20.4924	20.6508	20.6998	-0.422825	1.74569	0.00787082	AT3G26560.1	411	2446600	4442000	1733000	1712400	4388400	2305600	1752900	1305100	1	77.9104	2.18305e-06	99.283	88.409	99.283	1	YSVDMS(1)PVK	Y(-90)S(-78)VDMS(78)PVK	2	-0.21139
AT3G26910.1	267	S	19.3602	19.2085	19.7739	19.6326	18.9006	19.2762	19.3259	19.8405	-0.158	0.584357	0.131004	AT3G26910.1;AT3G26910.2;AT3G26910.3	267;267;267	577060	1154700	841990	741710	1245900	992400	699690	0	0.999963	44.2643	0.000149003	79.974	61.938	61.65	1	EGELS(1)FDYR	EGELS(44)FDY(-44)R	2	0.2949
AT3G26910.1	558	S	18.9365	17.7034	18.4755	18.7603	18.272	17.7163	17.9626	18.2246	-0.42505	0.983384	0.0476435	AT3G26910.1;AT3G26910.2;AT3G26910.3;AT5G41100.2;AT5G41100.1	558;558;558;519;519	0	0	342330	405170	805870	336600	271970	234710	0.994134	24.9619	0.00300991	53.968	31.346	51.346	1	S(0.003)Y(0.002)S(0.994)IPS(0.001)R	S(-25)Y(-27)S(25)IPS(-32)R	2	0.021006
AT3G26935.1	377	S	20.29	20.587	20.7471	20.0093	20.3153	20.4346	20.082	19.9156	-0.221475	0.807466	0.0735485	AT3G26935.1	377	1099300	3002300	1653000	962950	3321600	2215100	1181700	757840	1	113.649	2.24109e-29	142.83	127.95	113.65	1	DGELGELS(1)PDIR	DGELGELS(110)PDIR	2	0.42518
AT3G27210.1	40	S	19.7176	17.8678	18.4487	17.9609	18.1101	17.6045	17.7399	18.2457	-0.5737	0.901045	0.0582849	AT3G27210.1	40	0	455910	0	232810	720350	0	233060	238180	0.890264	9.16537	0.000104584	72.089	58.953	72.089	1	NDNVS(0.002)ILS(0.89)PS(0.108)VK	NDNVS(-27)ILS(9.2)PS(-9.2)VK	2	1.1899
AT3G27320.1	115	S	19.948	18.7374	18.9645	18.7982	16.5431	18.3453	18.8151	18.5641	-1.04513	1.19913	0.0283638	AT3G27320.1	115	867270	833050	480440	415950	0	520530	491060	296980	0.994509	23.8625	0.00154673	48.053	42.774	48.053	1	RNS(0.995)LGS(0.004)S(0.001)NSLLSHK	RNS(24)LGS(-24)S(-30)NS(-35)LLS(-44)HK	3	0.62199
AT3G27350.1	36	S	14.941	13.1946	13.2335	20.0851	19.933	20.4749	20.1577	20.3288	4.86005	0.00536923	1.91056	AT3G27350.1;AT3G27350.2	36;36	0	0	0	1014900	2548500	2277900	1245400	0	0.955594	14.0054	9.8547e-18	113.6	105.52	93.767	1	NDSHEENTIHALS(0.006)QS(0.038)IS(0.956)FGK	NDS(-80)HEENT(-69)IHALS(-22)QS(-14)IS(14)FGK	3	-0.63253
AT3G27390.2	486	S	18.7083	18.6516	19.6613	18.4032	18.7378	18.5724	20.3638	17.629	-0.03035	0.317298	0.285349	AT3G27390.2;AT3G27390.1	486;486	367250	784910	0	316330	1113000	609260	0	155330	0.970989	18.2569	2.60201e-05	86.291	73.311	86.291	1	SSNAIS(0.015)AS(0.971)PPLT(0.015)ER	S(-70)S(-70)NAIS(-18)AS(18)PPLT(-18)ER	2	-0.17776
AT3G28180.1	581	S	21.1316	20.9867	20.2652	20.0441	20.724	20.6409	19.6747	19.6347	-0.438325	0.8035	0.0742842	AT3G28180.1	581	1970000	3960700	1183600	986470	4409600	2555600	891050	623750	0.998023	27.0323	1.6514e-50	162.41	122.78	150.05	1	RNS(0.998)ES(0.002)GLELLSK	RNS(27)ES(-27)GLELLS(-94)K	2	0.59872
AT3G28860.1	628	S	20.0453	18.0513	16.3538	15.7672	18.6951	15.8601	15.6124	15.496	-1.1385	0.710572	0.0940574	AT3G28860.1	628	927790	517760	78658	50889	1080500	92965	53336	35411	0.828744	6.94282	9.04457e-09	107.79	74.525	78.556	1	LSHS(0.004)LS(0.829)T(0.168)K	LS(-62)HS(-23)LS(6.9)T(-6.9)K	2	0.16582
AT3G28860.1	647	S	21.5457	21.8234	21.191	20.9179	21.3116	21.3718	20.6634	20.3108	-0.4551	0.976945	0.0483964	AT3G28860.1	647	2624800	7073600	2248500	1807700	6626200	4241500	1768200	996680	0.935096	11.6187	2.84557e-77	187.57	89.657	154.47	1	NLSYSYS(0.935)T(0.064)GADGR	NLS(-40)Y(-67)S(-34)Y(-77)S(12)T(-12)GADGR	2	0.49654
AT3G28920.1	273	S	17.2893	16.6438	15.3547	19.166	16.6804	15.0056	13.1968	15.7922	-1.9447	1.20946	0.0276749	AT3G28920.1	273	137340	195170	39354	0	267400	0	0	43482	1	61.7317	0.000197074	61.732	51.778	61.732	1	NDNGIGGENS(1)NDDGVR	NDNGIGGENS(62)NDDGVR	2	0.51943
AT3G28920.1	13	S	18.3164	16.211	17.1146	17.0016	18.0345	15.5919	16.0899	16.5238	-0.600875	0.68521	0.100419	AT3G28920.1;AT5G39760.1	13;18	279890	0	133280	119730	683530	77197	74266	72200	1	76.7882	5.76477e-24	135.99	128.23	135.99	1	S(1)PEPESETPTR	S(77)PEPES(-77)ET(-97)PT(-110)R	2	-0.0701
AT3G29360.2	393	S	23.3877	24.4329	25.0341	24.4286	23.7867	24.2531	23.8408	23.6287	-0.4435	0.865868	0.0635798	AT3G29360.2;AT3G29360.1	393;393	9410200	43169000	32268000	20604000	36843000	31253000	15997000	9938800	0.996293	25.0117	2.39484e-78	183.86	164.53	112.3	1	FDWDHPLHLQPMS(0.996)PT(0.003)T(0.001)VK	FDWDHPLHLQPMS(25)PT(-25)T(-32)VK	2	0.49758
AT3G42170.1	12	S	22.9802	23.3043	22.3065	23.0262	23.1871	23.3878	23.013	24.1924	0.540775	0.035838	1.10123	AT3G42170.1	12	7094600	19744000	0	7794800	24314000	17155000	9012600	0	0.97198	17.3208	4.71671e-41	155.93	141.69	76.151	1	MEVY(0.002)NDDT(0.018)EMRS(0.972)PET(0.008)QPIK	MEVY(-27)NDDT(-17)EMRS(17)PET(-21)QPIK	2	-0.7754
AT3G42170.1	560	S	19.7172	20.6438	18.6888	19.4422	22.857	21.9325	21.0784	20.3961	1.943	0.00592756	1.86786	AT3G42170.1;AT3G42170.2	560;538	739050	3122800	396870	649980	19342000	6256200	2357600	1057400	0.986988	19.7698	4.91682e-31	128.29	114.55	112.86	1	TVDDGIHELFTEYMALPS(0.987)PQNT(0.01)T(0.002)SEGGK	T(-84)VDDGIHELFT(-66)EY(-47)MALPS(20)PQNT(-20)T(-27)S(-33)EGGK	3	-0.49614
AT3G43300.2	1406	S	18.2367	18.7	18.8622	18.3997	17.5126	17.926	17.5936	17.1636	-1.0007	2.79733	0.000693253	AT3G43300.2;AT3G43300.3;AT3G43300.1	1406;1418;1437	264850	811700	447570	315550	476050	389250	210590	112500	0.858641	7.83488	4.32047e-10	105.39	87.581	100.41	1	NLVLAGDIEADAS(0.141)DS(0.859)PR	NLVLAGDIEADAS(-7.8)DS(7.8)PR	2	1.0867
AT3G43300.2	1502	S	22.321	22.5758	22.8063	22.4263	22.1598	22.4086	22.1224	22.2293	-0.302325	1.60953	0.0108057	AT3G43300.2;AT3G43300.3;AT3G43300.1	1502;1514;1533	4492500	11916000	6889000	5143000	11929000	8702400	4861100	3767800	0.97384	15.7958	3.35764e-148	234.9	219.93	207.97	1	SSVAEVT(0.001)VPS(0.026)S(0.974)PYK	S(-160)S(-160)VAEVT(-33)VPS(-16)S(16)PY(-53)K	2	0.11149
AT3G44750.1	103	S	21.5607	21.54	21.9453	21.5173	21.765	21.3979	21.6295	21.4405	-0.0826	0.555005	0.141829	AT3G44750.1	103	2652400	5811800	3792800	2738800	9073100	4319000	3454400	2180900	0.999922	42.4093	3.1736e-31	130.33	123.9	121.39	1	TPNIEPQGYS(1)EEEEEEEEEVPAGNAAK	T(-47)PNIEPQGY(-42)S(42)EEEEEEEEEVPAGNAAK	3	-0.12937
AT3G45190.2	674	S	20.3831	19.5167	20.4033	20.0524	18.4639	19.5985	18.7295	20.1647	-0.849725	1.28459	0.0231591	AT3G45190.2;AT3G45190.1	674;712	0	1429700	1302500	992160	920510	0	462770	0	0.999997	54.8434	2.23901e-05	72.652	66.993	72.652	1	S(1)PPVPSLFGK	S(55)PPVPS(-55)LFGK	2	0.19465
AT3G45190.2	470	S	17.4376	16.9032	18.8629	16.5145	23.8703	22.3042	20.606	18.6326	3.92373	0.00420822	2.01577	AT3G45190.2;AT3G45190.1	470;508	0	0	447790	85425	39041000	0	1699200	311420	0.981994	17.3837	3.18643e-23	116.49	106.25	65.587	1	T(0.018)RDS(0.982)DDDEVHDRDYDLAGLANNLNQFR	T(-17)RDS(17)DDDEVHDRDY(-41)DLAGLANNLNQFR	3	-2.4526
AT3G45780.2	350	S	18.4875	19.5993	19.3569	21.4291	19.7602	19.6135	21.3867	19.0539	0.235375	0.213745	0.410387	AT3G45780.2;AT3G45780.1	350;350	315140	1514000	630610	0	2260800	1253800	0	417050	0.9861	21.5295	0.00014588	88.087	67.423	51.218	1	ALS(0.986)ES(0.007)T(0.007)NLHPFMTK	ALS(22)ES(-22)T(-22)NLHPFMT(-45)K	2	0.41133
AT3G45780.2	58	S	20.939	20.688	20.4169	19.7542	18.0747	20.9293	19.4261	21.9905	-0.344375	0.447652	0.191611	AT3G45780.2;AT3G45780.1	58;58	1723700	3219900	0	806910	0	3121100	750010	0	0.976794	16.242	3.41301e-08	91.583	81.662	83.606	1	GT(0.023)S(0.977)PQPRPQQEPAPSNPVR	GT(-16)S(16)PQPRPQQEPAPS(-62)NPVR	3	0.035907
AT3G45780.2	185	S	19.0437	20.0713	19.8757	18.6958	20.4981	18.6586	19.4074	19.5327	0.102575	0.238241	0.374456	AT3G45780.2;AT3G45780.1	185;185	463360	2099900	903530	387460	3770500	0	740360	581190	0.999321	31.6778	0.000167691	77.593	38.959	77.593	1	S(0.001)GIPRVS(0.999)EDLK	S(-32)GIPRVS(32)EDLK	2	-0.23223
AT3G45780.2	170	S	17.4994	16.3136	17.2272	17.3166	17.8226	15.7642	14.3819	16.4912	-0.974225	0.903052	0.0579974	AT3G45780.2;AT3G45780.1	170;170	158870	0	144100	0	590190	0	0	0	0.994631	25.6878	3.15745e-09	102.87	91.382	102.87	1	S(0.003)S(0.003)GEMS(0.995)DGDVPGGR	S(-26)S(-26)GEMS(26)DGDVPGGR	2	-1.1556
AT3G46510.1	344	S	17.7494	17.7108	17.2279	17.578	17.6637	16.7044	17.0505	17.0803	-0.4418	1.27946	0.0234419	AT3G46510.1	344	188930	408910	144170	178530	528630	166910	144530	106190	0.974365	17.1097	0.00165245	45.915	31.952	45.915	1	VS(0.019)S(0.974)FS(0.005)S(0.001)PAEANK	VS(-17)S(17)FS(-23)S(-29)PAEANK	2	-0.064118
AT3G46780.1	395	S	18.4536	18.4679	18.172	18.7175	18.4637	17.8748	17.822	17.7805	-0.4675	1.5689	0.0118796	AT3G46780.1	395	307820	691060	277380	0	920380	375670	246710	172530	1	56.9514	9.52935e-06	89.629	74.479	56.951	1	EAEAAS(1)LAEDAQQK	EAEAAS(57)LAEDAQQK	2	0.48759
AT3G47470.1	70	S	18.9187	21.2264	21.2858	23.8088	22.8412	14.0403	13.7156	13.0498	-5.3982	1.41813	0.0169076	AT3G47470.1	70	424920	4676500	0	0	19131000	0	0	0	0.811755	6.5802	1.34687e-41	129.5	123.3	69.523	1	KGEWLPGLAS(0.001)PDY(0.009)LT(0.178)GS(0.812)LAGDNGFDPLGLAEDPENLK	KGEWLPGLAS(-31)PDY(-19)LT(-6.6)GS(6.6)LAGDNGFDPLGLAEDPENLK	3	-0.42338
AT3G48050.2	705	S	18.1566	17.4204	17.4365	18.4872	17.7244	17.5546	17.9974	17.4422	-0.195525	0.577612	0.133404	AT3G48050.2;AT3G48050.1	705;705	0	334340	166600	0	551340	300900	278600	136460	0.998885	30.1064	3.71714e-09	81.317	72.363	81.317	1	DILTGS(0.001)QEAAGS(0.999)PLVAGDER	DILT(-39)GS(-30)QEAAGS(30)PLVAGDER	2	-0.304
AT3G48050.2	1065	S	19.2678	18.3837	18.278	17.716	18.8391	18.628	19.0891	18.4606	0.342825	0.0870413	0.740853	AT3G48050.2;AT3G48050.1	1065;1065	0	651890	298530	196460	1193900	633230	0	276420	1	45.1154	3.01374e-05	85.457	72.366	45.115	1	VEPVEGNLENS(1)EVK	VEPVEGNLENS(45)EVK	2	-0.83402
AT3G48050.2	653	S	18.4438	16.0189	18.4992	17.201	16.904	15.5155	14.4496	14.0591	-2.30868	1.7276	0.00820882	AT3G48050.2;AT3G48050.1	653;653	305730	126560	0	0	312210	0	0	0	0.854088	7.67413	0.00301477	42.395	23.152	42.395	1	VS(0.146)S(0.854)PVHAVK	VS(-7.7)S(7.7)PVHAVK	2	-0.31927
AT3G48200.1	808	S	18.0872	16.7282	17.8612	17.7574	18.1795	18.1316	17.8147	17.8156	0.37685	0.0653985	0.854505	AT3G48200.1	808	0	0	223620	202170	755850	448870	245470	176780	1	51.841	2.25583e-11	107.18	93.513	51.841	1	IIAS(1)DDENEDAEAPCIQK	IIAS(52)DDENEDAEAPCIQK	2	-0.071409
AT3G48440.1	240	S	18.6239	18.2865	18.1474	18.2698	17.6608	17.6234	17.8492	17.5893	-0.651225	3.1378	0.000316282	AT3G48440.1	240	0	609440	272690	288390	0	315600	251410	151110	0.821762	7.50545	0.000137868	66.335	52.429	66.335	1	FNHPDPT(0.001)T(0.001)IGGT(0.03)DS(0.822)PS(0.146)FR	FNHPDPT(-28)T(-28)IGGT(-14)DS(7.5)PS(-7.5)FR	2	1.0527
AT3G48440.1	4	S	17.048	16.5187	17.5073	17.3757	14.7849	14.646	14.367	17.2372	-1.85365	1.7183	0.00838811	AT3G48440.1	4	116190	0	0	155180	0	0	0	118390	1	42.7886	0.00278463	42.789	35.244	42.789	1	VNS(1)EEIADGFEPK	VNS(43)EEIADGFEPK	2	-0.6243
AT3G48500.1	434	S	20.5827	20.8308	20.8774	20.6675	20.4572	20.4783	20.2976	20.3374	-0.346975	2.56098	0.00119508	AT3G48500.1;AT3G48500.2	434;463	1346500	3554900	1809200	1519700	3665000	2283200	1372200	1015200	1	90.4889	6.11063e-77	185.95	153.67	170.79	1	LSELS(1)DDEDFDEQK	LS(-90)ELS(90)DDEDFDEQK	2	-0.26864
AT3G48710.1	52	S	20.1057	19.9422	19.3829	19.4142	20.0452	19.3842	19.2571	19.0147	-0.28595	0.747892	0.0854945	AT3G48710.1	52	967460	1920200	642080	637500	2754500	1069500	667120	405870	0.999992	50.9505	5.05387e-09	107.18	67.91	107.18	1	S(1)PVTPVSERPIR	S(51)PVT(-51)PVS(-77)ERPIR	2	-0.23172
AT3G48740.1	248	S	22.0079	22.3472	21.9247	21.6764	21.8325	22.4063	21.6541	21.3734	-0.172475	0.577259	0.133531	AT3G48740.1	248	3616100	10170000	3739000	3058100	9508000	0	3513600	2081800	0.991975	21.5376	3.65387e-50	162.48	114.48	119.17	1	LGTVS(0.007)S(0.992)PEPIS(0.001)VVR	LGT(-56)VS(-22)S(22)PEPIS(-30)VVR	2	0.0073467
AT3G48800.1	156	S	19.7473	19.2932	19.8081	19.7869	18.2564	18.4133	19.5377	19.2866	-0.785375	1.52222	0.0132484	AT3G48800.1	156	0	1224500	862200	825410	797200	545670	0	0	1	43.5122	0.00246716	44.309	31.683	43.512	1	IS(1)GGEELEGGFR	IS(44)GGEELEGGFR	2	-0.87939
AT3G48860.1	128	S	17.9836	16.1631	15.7401	15.4842	16.9326	12.4837	15.41	11.6819	-2.2157	1.11622	0.034573	AT3G48860.1;AT3G48860.2	128;128	222230	139870	0	41823	318470	0	0	0	0.981331	19.4519	0.0108891	46.706	26.944	46.706	1	T(0.008)RS(0.981)PS(0.011)PALGR	T(-21)RS(19)PS(-19)PALGR	2	-0.20161
AT3G48890.1	186	S	18.725	19.0116	19.2054	18.338	17.0038	18.9817	20.881	18.8036	0.097525	0.263059	0.342642	AT3G48890.1	186	371520	1007400	567780	0	0	809140	0	350610	0.972206	15.4703	2.50138e-15	111.43	102.59	110.08	1	T(0.028)AS(0.972)AEGLSTNTGEEASAITHDETSR	T(-15)AS(15)AEGLS(-38)T(-45)NT(-53)GEEAS(-73)AIT(-91)HDET(-110)S(-110)R	3	0.71799
AT5G24430.1	353	S	19.3796	18.1248	17.459	17.8309	15.6822	17.7311	17.4552	17.5637	-1.09053	1.16593	0.0306978	AT5G24430.1;AT3G49370.1	353;352	584860	544810	169220	212740	0	340060	191330	148450	0.999979	46.8109	0.00022168	83.206	21.244	83.206	1	TES(1)AIFR	T(-47)ES(47)AIFR	2	-0.39299
AT3G49590.1	248	S	19.1608	19.3984	19.4244	19.395	19.6131	19.6009	19.3309	19.4023	0.14215	0.041236	1.04296	AT3G49590.1;AT3G49590.2;AT3G49590.3	248;248;248	502540	1317200	660840	629070	2041700	1242900	702140	530970	0.99355	23.9737	5.24117e-06	99.566	72.597	91.937	1	IIT(0.001)DY(0.002)VGS(0.994)PAT(0.004)DPMR	IIT(-32)DY(-27)VGS(24)PAT(-24)DPMR	2	1.2029
AT3G49590.1	397	S	18.9286	18.752	19.1992	18.7461	18.3764	18.5881	19.4627	20.1732	0.243625	0.151692	0.530462	AT3G49590.1;AT3G49590.2;AT3G49590.3	397;397;397	427830	841500	0	401200	866340	615930	0	0	1	43.2819	0.000280823	64.04	59.684	43.282	1	NPLPPFS(1)PK	NPLPPFS(43)PK	2	-0.10824
AT3G49590.1	382	S	17.249	16.1572	16.8524	17.3243	15.8817	16.4183	17.1028	17.1522	-0.256975	0.56224	0.139067	AT3G49590.1;AT3G49590.2;AT3G49590.3	382;382;382	0	0	111130	149740	0	136890	149860	111610	0.849448	9.09511	0.000313025	57.836	45.988	57.836	1	Y(0.046)VS(0.849)S(0.105)NFSEPGR	Y(-13)VS(9.1)S(-9.1)NFS(-34)EPGR	2	-0.16098
AT3G49590.1	386	S	17.7379	16.8623	17.2479	16.9529	17.8142	17.2645	17.6708	17.5959	0.3861	0.0321783	1.14621	AT3G49590.1;AT3G49590.2;AT3G49590.3	386;386;386	187440	227090	146180	115760	586770	246090	222170	151800	0.985128	18.7266	7.9865e-05	69.01	60.497	69.01	1	YVS(0.002)S(0.013)NFS(0.985)EPGR	Y(-58)VS(-28)S(-19)NFS(19)EPGR	2	-0.33073
AT3G50370.1	187	S	12.6974	10.9973	12.9096	19.5833	18.2515	19.306	18.7103	18.6854	4.6914	0.0107932	1.61001	AT3G50370.1;AT3G50370.2	187;191	0	0	0	716760	794480	0	0	323050	0.859649	11.8016	9.5049e-05	60.139	47.584	60.139	1	LGNELS(0.036)ES(0.057)PS(0.86)FS(0.047)DGLHSSEHVR	LGNELS(-14)ES(-12)PS(12)FS(-13)DGLHS(-38)S(-42)EHVR	3	1.1435
AT3G50370.1	1406	S	19.7901	19.0126	18.945	18.7794	18.6441	12.7201	14.5755	13.1764	-4.35275	2.02398	0.0041293	AT3G50370.1;AT3G50370.2	1406;1410	777340	1008100	474010	410560	1043000	0	0	0	0.99991	40.4684	8.58103e-07	98.902	84.34	98.902	1	NPLS(1)PNSGQANLK	NPLS(40)PNS(-40)GQANLK	2	-0.21635
AT3G50370.1	289	S	20.8142	19.8423	19.2725	19.2485	18.7339	18.6508	18.3634	18.9926	-1.1092	1.83738	0.00636188	AT3G50370.1;AT3G50370.2	289;293	1580900	1791700	594780	568310	1110000	643290	359070	0	0.991978	21.1044	0.00362296	42.338	30.898	42.338	1	SSLT(0.008)QVRPVS(0.992)GGGR	S(-38)S(-38)LT(-21)QVRPVS(21)GGGR	3	-0.69504
AT3G51470.2	303	S	21.5613	20.7193	19.1176	18.9485	18.3172	20.8531	20.1257	18.9983	-0.5131	0.546705	0.145078	AT3G51470.2;AT3G51470.1	303;347	0	3290500	0	461630	0	2960500	1218100	401280	0.999557	33.531	6.17579e-16	120.57	54.732	78.692	1	SIS(1)AEGLDLLK	S(-34)IS(34)AEGLDLLK	2	-0.22929
AT3G51470.2	15	S	16.5278	17.4536	16.3883	17.4343	16.3957	15.8316	16.2107	18.0562	-0.32745	0.533254	0.15053	AT3G51470.2;AT3G51470.1	15;59	81014	342140	0	161610	219510	91150	0	0	0.997312	26.3564	0.000791906	51.211	30.83	51.211	1	S(0.997)PEGVNS(0.002)TFQPVFR	S(26)PEGVNS(-26)T(-34)FQPVFR	2	-0.38578
AT3G51670.1	6	S	15.2988	18.0971	13.4574	15.0764	18.4146	18.6353	18.5066	18.6431	3.06748	0.00416657	2.02008	AT3G51670.1	6	0	534440	0	0	889580	636410	396540	313700	0.998605	28.5483	0.000162676	65.395	49.824	65.395	1	MDAS(0.001)LS(0.999)PFDHQK	MDAS(-29)LS(29)PFDHQK	2	-0.32217
AT3G51800.3	16	S	18.2987	18.0087	18.9657	18.1979	17.5234	18.2565	17.83	17.7794	-0.520425	1.34674	0.0199989	AT3G51800.3;AT3G51800.1;AT3G51800.2	16;16;16	276490	502690	0	274360	479630	0	248080	172390	0.760097	6.3387	0.00163519	46.069	26.798	46.069	1	ELS(0.004)LT(0.177)S(0.76)PEVVT(0.059)K	ELS(-22)LT(-6.3)S(6.3)PEVVT(-11)K	2	-3.2426
AT3G51880.5	146	S	19.9045	20.1921	20.5458	20.3977	20.4702	20.0429	20.3824	20.1485	0.000975	0.299085	0.302983	AT3G51880.5;AT3G51880.3;AT3G51880.1	146;146;146	841490	2283300	1437700	1260500	3698300	1688400	1455300	890650	1	196.608	1.45498e-220	269.16	249.05	249.16	1	SEINDEDEAS(1)GEEELLEK	S(-200)EINDEDEAS(200)GEEELLEK	2	-0.054008
AT3G51950.4	352	S	19.1018	18.5389	19.4327	18.0764	14.7024	11.5008	13.4058	17.4032	-4.5344	2.22293	0.00260706	AT3G51950.4;AT3G51950.3;AT3G51950.2;AT3G51950.1	352;352;352;352	482410	725960	0	252200	0	0	0	132820	0.995404	23.4059	0.00033209	59.908	40.121	51.268	1	ELS(0.995)PT(0.005)GLDSSPR	ELS(23)PT(-23)GLDS(-46)S(-46)PR	2	0.17123
AT3G52250.2	1503	S	17.6919	17.4335	17.5024	17.0753	17.6451	17.2788	17.1158	17.2613	-0.100525	0.538619	0.148327	AT3G52250.2;AT3G52250.1	1503;1503	181550	337400	174390	0	521860	248550	151220	120380	0.998022	27.8875	0.000111013	67.153	54.527	67.153	1	S(0.002)HS(0.998)FSLSDTER	S(-28)HS(28)FS(-38)LS(-38)DT(-46)ER	2	0.50583
AT3G52290.1	48	S	18.2217	17.9983	17.8644	18.3081	17.6207	17.3446	17.553	17.125	-0.6873	2.70887	0.000849877	AT3G52290.1	48	262120	499060	224120	0	513120	260140	204740	109530	0.999478	33.3173	0.000190274	69.602	50.822	69.602	1	LDVTNSGAAYS(0.999)PR	LDVT(-49)NS(-33)GAAY(-44)S(33)PR	2	-1.2084
AT3G52400.1	8	S	18.1891	17.0157	19.3222	18.507	19.0906	19.5681	21.8909	18.8736	1.5973	0.0238257	1.2726	AT3G52400.1	8	256250	0	615630	339920	1421300	1214900	0	368050	0.949683	12.7586	6.21589e-07	87.363	63.512	58.674	1	MNDLLS(0.05)GS(0.95)FK	MNDLLS(-13)GS(13)FK	2	-0.50499
AT3G52870.1	373	S	18.5546	14.7617	16.7087	17.5842	15.9012	16.9297	16.7788	17.2365	-0.19075	0.38137	0.233257	AT3G52870.1	373	330150	0	100600	179300	0	195130	119720	118330	0.989643	22.166	0.00131136	47.603	26.139	47.603	1	T(0.004)LS(0.99)GGLGS(0.006)PK	T(-24)LS(22)GGLGS(-22)PK	2	-0.59009
AT3G52880.1	416	S	19.7364	19.7776	19.8742	19.5587	19.5873	19.4428	19.4292	19.6434	-0.21105	1.62813	0.0103469	AT3G52880.1;AT3G52880.2	416;448	748940	1713100	902620	704660	2005500	1113900	751630	627560	0.999356	31.9079	5.45183e-09	110.98	70.396	101.62	1	ARPS(0.999)AES(0.001)LDELVK	ARPS(32)AES(-32)LDELVK	2	-0.29896
AT3G52930.1	42	S	16.6289	15.7159	16.674	16.9809	17.3343	16.6084	17.6529	17.6304	0.806575	0.0153935	1.45812	AT3G52930.1	42	86898	0	98204	118030	420720	0	219420	155480	0.999989	49.627	0.00107984	49.627	37.066	49.627	1	LAS(1)INVENVETNR	LAS(50)INVENVET(-50)NR	2	0.9737
AT3G52930.1	350	S	18.6174	19.0635	18.5721	18.6041	18.2114	18.3369	18.3036	18.5172	-0.372	1.80315	0.00688796	AT3G52930.1	350	344820	1044300	366040	363600	772700	517500	344490	287490	1	96.7337	5.33604e-07	96.734	74.259	96.734	1	LGDGAAES(1)LHVK	LGDGAAES(97)LHVK	2	-0.10455
AT3G52950.2	410	S	19.0508	19.7169	17.4673	18.9191	12.6385	14.0859	13.3961	18.499	-4.13365	1.89669	0.0055447	AT3G52950.2;AT3G52950.1	410;410	0	1642500	170190	0	0	0	0	283890	0.924091	14.0307	0.00023102	59.198	47.053	56.599	1	LS(0.003)S(0.016)Y(0.013)PS(0.924)LGLGNS(0.037)FS(0.008)FK	LS(-25)S(-18)Y(-19)PS(14)LGLGNS(-14)FS(-21)FK	2	-0.38104
AT3G53180.1	404	S	17.403	16.7948	18.2324	17.6703	18.2882	18.33	17.6583	17.5215	0.424375	0.0677663	0.840213	AT3G53180.1	404	148610	0	289250	190330	814970	515040	220240	144170	0.999845	38.4553	4.72274e-07	91.317	65.335	91.317	1	LNIDTDSSSPQNIIS(1)PK	LNIDT(-66)DS(-56)S(-50)S(-38)PQNIIS(38)PK	2	1.3784
AT3G53500.3	236	S	17.5577	17.4424	18.08	17.5576	17.7768	18.4092	17.8315	17.8011	0.295225	0.0473272	0.986123	AT3G53500.3;AT3G53500.1;AT3G53500.2	236;236;277	165420	339490	260240	176030	571730	0	248350	175010	0.994619	22.6679	0.000242203	83.729	72.196	75.669	1	SPIDDEAELS(0.005)RPS(0.995)PK	S(-69)PIDDEAELS(-23)RPS(23)PK	2	0.68631
AT3G53520.3	26	S	17.9164	18.6497	19.9046	19.0437	16.0319	16.4818	17.2457	17.406	-2.08725	2.43436	0.00160028	AT3G53520.3;AT3G53520.2;AT3G53520.1;AT3G53520.4	26;26;26;26	212120	783900	0	0	0	0	165470	133080	0.99013	22.9497	0.000287482	58.671	37.42	53.777	1	RDEETIPMS(0.002)QS(0.002)S(0.002)PY(0.005)S(0.99)PK	RDEET(-43)IPMS(-28)QS(-28)S(-28)PY(-23)S(23)PK	2	-0.13529
AT3G53870.1	212	S	14.1251	12.4706	14.1007	17.8136	17.2977	11.814	18.7035	15.1665	1.11792	0.146682	0.542687	AT3G53870.1	212	0	0	0	210210	410170	0	0	28181	0.999999	62.1402	0.000310591	62.14	55.287	62.14	1	TPLPDVVIIHS(1)PK	T(-62)PLPDVVIIHS(62)PK	2	0.30487
AT3G53930.5	265	S	19.1234	19.0742	19.0628	19.0121	19.1096	15.1327	13.1157	14.6523	-3.56555	1.80266	0.00689546	AT3G53930.5;AT3G53930.3;AT3G53930.4;AT3G53930.1;AT3G53930.2	265;265;266;450;451	489710	1052100	0	0	1440200	0	0	0	0.999466	32.7201	8.8897e-06	77.379	58.634	66.595	1	S(0.001)HS(0.999)PPVEFIK	S(-33)HS(33)PPVEFIK	2	-0.26291
AT3G53930.5	212	S	13.9453	11.5278	17.0801	13.1677	16.076	16.1866	17.1579	17.0433	2.68573	0.0146198	1.48014	AT3G53930.5;AT3G53930.3;AT3G53930.4;AT3G53930.1;AT3G53930.2	212;212;212;397;397	0	0	130130	0	0	0	155700	103500	0.865214	8.25445	0.0150982	45.257	26.945	43.991	1	S(0.001)QFKPS(0.865)S(0.129)LPDS(0.005)R	S(-30)QFKPS(8.3)S(-8.3)LPDS(-23)R	2	-0.86129
AT3G54610.1	84	S	17.7443	17.9369	18.4516	18.1686	17.9306	17.9393	18.0727	18.3736	0.0037	0.294406	0.307757	AT3G54610.1	84	188270	478280	336710	268850	636040	392870	293530	260260	0.99665	24.7366	1.31611e-05	86.378	73.586	86.378	1	DGALTSNDELES(0.003)IS(0.997)AR	DGALT(-64)S(-64)NDELES(-25)IS(25)AR	2	-0.48092
AT3G54760.2	467	S	18.3507	18.2248	17.738	17.4054	16.6508	17.6173	17.5163	17.7978	-0.534175	1.08836	0.0369634	AT3G54760.2;AT3G54760.1	467;498	286630	583930	205320	158400	0	314270	199600	174610	0.999815	37.3207	4.40614e-09	106.13	91.44	106.13	1	ADVLSEDS(1)PGEGRK	ADVLS(-37)EDS(37)PGEGRK	2	-0.23794
AT3G54760.2	369	S	20.8553	20.8069	20.402	20.3006	21.2066	20.2682	20.4621	20.3994	-0.007125	0.31044	0.29182	AT3G54760.2;AT3G54760.1	369;400	1626600	3496500	1301300	1178400	6161400	1973800	1537900	1059800	1	81.1751	1.91797e-109	213.49	200.61	197.17	1	VGVGAES(1)PAAATDCSK	VGVGAES(81)PAAAT(-81)DCS(-110)K	2	-0.19918
AT3G54760.2	487	S	18.9793	19.4556	20.147	19.5744	19.0864	19.2078	19.4778	19.694	-0.172575	0.556862	0.141114	AT3G54760.2;AT3G54760.1	487;518	443150	1370400	1090500	712350	1417200	946430	777370	649920	0.999965	44.5646	0.00124086	58.676	53.311	53.569	1	VSFAERPS(1)FK	VS(-45)FAERPS(45)FK	2	-0.20294
AT3G55020.2	178	S	13.1537	11.3937	18.3377	14.1183	16.4807	17.6253	17.8515	17.9504	3.22612	0.017039	1.41483	AT3G55020.2;AT3G55020.3;AT3G55020.1	178;178;178	0	0	311140	0	0	316010	251810	194090	0.997906	26.7816	0.00120461	47.894	28.257	47.559	1	IS(0.002)PS(0.998)FDDAK	IS(-27)PS(27)FDDAK	2	-0.068217
AT3G55020.2	121	S	18.8803	18.6822	18.5549	18.3278	17.6405	18.5386	18.4541	17.89	-0.4805	1.30388	0.0221269	AT3G55020.2;AT3G55020.3;AT3G55020.1	121;121;121	0	801750	361690	300220	0	595160	382370	186130	0.999468	32.8845	2.99739e-05	72.532	58.425	56.215	1	LGSDVT(0.001)PDNAS(0.999)EEEGHPDAEK	LGS(-48)DVT(-33)PDNAS(33)EEEGHPDAEK	2	0.84507
AT3G55270.1	295	S	18.6409	21.331	20.784	19.6972	19.1059	20.5451	20.326	20.3571	-0.02975	0.315768	0.286776	AT3G55270.1	295	350490	5028300	0	775640	0	2391400	1399500	1029200	0.845792	10.4019	0.000297446	62.924	52.4	42.041	1	VHAFPLS(0.846)PT(0.077)S(0.077)LLR	VHAFPLS(10)PT(-10)S(-10)LLR	2	4.2152
AT3G55320.1	791	S	18.8112	17.6858	18.735	18.732	16.9744	17.8039	18.5219	18.6067	-0.514275	0.807801	0.0734868	AT3G55320.1	791	0	0	409790	397290	0	0	400750	305900	0.772068	8.64695	0.000984422	50.358	32.202	50.358	1	S(0.04)HS(0.772)QT(0.027)FS(0.105)RPLS(0.027)S(0.027)PDDTK	S(-13)HS(8.6)QT(-15)FS(-8.6)RPLS(-15)S(-15)PDDT(-34)K	3	0.63752
AT3G55460.1	22	S	18.3092	16.9007	16.5299	17.1609	17.6393	16.3775	16.7489	16.7962	-0.3347	0.601364	0.125171	AT3G55460.1	22	0	233210	88869	0	519760	0	117260	87208	1	108.47	3.5487e-10	108.47	98.483	108.47	1	GRS(1)PPPPPPR	GRS(110)PPPPPPR	2	-0.30586
AT3G55460.1	5	S	19.9383	20.5088	20.9963	20.8051	20.4957	20.5191	20.8287	20.623	0.0545	0.232818	0.381989	AT3G55460.1	5	861450	2843800	1964600	1671800	3764200	2348700	1982900	1237500	0.99992	41.0834	6.20277e-15	113.54	98.873	104.17	1;2	RYS(1)PPYYS(1)PPR	RY(-41)S(41)PPY(-51)Y(-38)S(38)PPR	2	-0.041198
AT3G55460.1	10	S	19.9383	20.5088	20.7046	20.4943	20.4957	20.2882	20.5749	20.623	0.08395	0.173439	0.482476	AT3G55460.1	10	861450	2843800	1605000	1347800	3764200	2001400	1663000	1237500	0.999966	45.9007	6.20277e-15	113.54	98.873	104.17	1;2	RYS(1)PPYYS(1)PPR	RY(-34)S(34)PPY(-51)Y(-46)S(46)PPR	2	-0.5262
AT3G55460.1	206	S	19.9728	19.6384	20.5077	19.6485	20.3156	20.4349	20.1437	20.2367	0.340875	0.0363963	1.0948	AT3G55460.1	206	882310	1555500	1400200	749920	3322400	2215500	1233400	946780	0.988339	21.9559	4.38998e-14	113.77	100.65	103.39	1	S(0.006)Y(0.005)S(0.988)PGYEGAAAAAPDR	S(-22)Y(-23)S(22)PGY(-36)EGAAAAAPDR	2	-1.0282
AT3G55980.1	517	S	17.6146	16.4988	17.6626	17.6475	17.6423	16.4906	17.4377	17.3531	-0.12495	0.42305	0.205881	AT3G55980.1;AT3G55980.2	517;584	172080	0	194870	187350	520860	0	0	128290	0.912585	10.1869	0.000873445	48.14	32.875	48.14	1	S(0.087)VS(0.913)FGIHGNNNNNAAR	S(-10)VS(10)FGIHGNNNNNAAR	2	0.062951
AT3G56240.1	12	S	17.042	16.4286	17.2851	16.9486	17.4031	17.2819	18.0845	17.5041	0.642325	0.00973931	1.65412	AT3G56240.1;AT3G56240.3	12;12	115710	168130	150000	115410	441260	0	0	142450	1	65.3469	0.00183302	65.347	54.589	65.347	1	VGMS(1)CQGCVGAVNR	VGMS(65)CQGCVGAVNR	2	-0.72879
AT3G56410.3	1270	S	13.5771	17.8862	13.4559	14.9596	17.6175	17.6743	19.2528	18.4049	3.26768	0.00543299	1.90545	AT3G56410.3;AT3G56410.1;AT3G56410.2	1270;1359;1406	0	461760	0	0	511950	326930	0	0	0.997813	28.8466	0.000255558	62.042	48.95	62.042	1	DS(0.001)DVFS(0.998)EGHEFPS(0.001)K	DS(-31)DVFS(29)EGHEFPS(-29)K	2	0.77597
AT3G57150.1	539	S	18.8118	19.2116	18.8648	18.8397	18.6097	17.9029	18.1012	18.3024	-0.702925	2.42742	0.001626	AT3G57150.1	539	394570	1157200	448380	428090	1018400	383070	299390	247720	1	117.856	1.03743e-20	130.06	116.29	130.06	1	DTEAAVDAEDES(1)AAEK	DT(-120)EAAVDAEDES(120)AAEK	2	-0.022808
AT3G57150.1	515	S	20.4687	20.4904	20.7112	20.2759	20.6332	20.5155	20.3335	20.3429	-0.030275	0.397453	0.222174	AT3G57150.1	515	1244200	2807800	1612400	1158400	4140700	2342900	1406800	1019100	1	43.3824	2.59438e-110	206.69	199.63	43.382	1	KEEVIEEVAS(1)PK	KEEVIEEVAS(43)PK	2	-0.028769
AT3G57300.3	228	S	14.1513	12.6783	12.7074	13.1484	18.0918	19.3736	19.98	19.4711	6.05778	5.64586e-06	4.87665	AT3G57300.3;AT3G57300.4;AT3G57300.1;AT3G57300.2	228;228;228;228	0	0	0	0	0	0	1101100	556890	0.999611	34.102	0.00065572	57.019	24.073	57.019	2	GT(1)LDLRS(1)LAELMAS(0.001)DK	GT(34)LDLRS(34)LAELMAS(-34)DK	2	-0.50984
AT3G57410.9	880	S	16.88	17.5743	17.2796	17.0304	17.8454	17.7412	17.4321	17.3123	0.391675	0.0209937	1.32615	AT3G57410.9;AT3G57410.8;AT3G57410.7;AT3G57410.5;AT3G57410.4;AT3G57410.3;AT3G57410.2;AT3G57410.1	880;880;880;880;880;880;880;880	103420	371980	149430	122150	599590	342450	188280	124710	0.999986	48.4207	2.63664e-10	108.56	77.142	106.49	1	EEEEVS(1)PAAEASAEEAK	EEEEVS(48)PAAEAS(-48)AEEAK	2	0.23846
AT3G57890.1	11	S	11.5477	13.0632	13.3755	13.5515	17.9927	18.0207	18.3944	18.1429	5.2532	6.51447e-06	4.83668	AT3G57890.1;AT3G57890.2	11;11	0	0	0	0	0	415650	0	221800	0.811186	7.61796	2.5582e-05	46.783	41.353	41.434	1	T(0.028)EEQDLIDQS(0.811)PPPS(0.14)APDPEPNS(0.006)S(0.006)T(0.006)NPNS(0.002)VIHPR	T(-15)EEQDLIDQS(7.6)PPPS(-7.6)APDPEPNS(-21)S(-21)T(-21)NPNS(-27)VIHPR	3	-0.38829
AT3G58170.1	56	S	19.1742	19.2292	19.6421	19.4617	19.1064	19.3046	19.1885	19.3413	-0.1416	0.845068	0.0669518	AT3G58170.1	56	507230	1171400	768490	658840	1437000	1012100	636130	508970	1	66.3856	0.000143925	73.11	61.496	72.417	1	RLS(1)GDINEEVDTHNR	RLS(66)GDINEEVDT(-66)HNR	3	-0.066794
AT3G58600.1	238	S	13.1096	13.5767	10.9352	21.3757	21.2057	21.2017	21.3008	21.2564	6.49185	0.00643416	1.8325	AT3G58600.1	238	0	0	0	2482800	6157400	3769800	2750600	1919600	0.818654	9.51792	7.74442e-08	61.725	51.325	54.867	1	SIET(0.005)T(0.005)IPS(0.002)IILPPPPPGPLS(0.819)PVT(0.076)T(0.091)AQK	S(-33)IET(-22)T(-22)IPS(-25)IILPPPPPGPLS(9.5)PVT(-10)T(-9.5)AQK	3	0.23083
AT3G58600.1	248	S	14.3781	14.5099	13.1306	17.724	17.5202	17.8419	18.0123	17.3785	2.75258	0.00701903	1.795	AT3G58600.1	248	0	0	0	197550	478580	367220	0	130570	0.901608	10.1339	0.000226496	67.153	55.663	67.153	1	S(0.087)PS(0.902)S(0.011)LPPSLSLQR	S(-10)PS(10)S(-19)LPPS(-60)LS(-60)LQR	2	-0.080727
AT3G58640.2	500	S	17.8739	17.9321	18.7338	18.2853	17.4314	17.7719	17.9212	18.6684	-0.25805	0.637497	0.113741	AT3G58640.2;AT3G58640.1	500;500	205960	476690	409440	291510	450020	349810	264270	0	0.999966	43.5484	0.000420871	65.395	51.138	54.7	2	AIS(1)LPS(0.542)S(0.458)PQNYR	AIS(44)LPS(0.73)S(-0.73)PQNY(-32)R	2	-0.31211
AT3G58640.2	320	S	16.8942	15.9938	16.8396	17.1292	16.796	16.952	18.5813	15.882	0.338625	0.155258	0.522049	AT3G58640.2;AT3G58640.1	320;320	104440	124380	0	0	289700	0	0	46276	0.963492	14.9761	0.000297999	62.891	37.968	62.891	1	LDGSPNT(0.006)S(0.031)GPPS(0.963)R	LDGS(-47)PNT(-22)S(-15)GPPS(15)R	2	0.19476
AT3G58640.2	418	S	19.9158	20.6442	20.7279	20.0205	21.9069	22.0518	21.7928	20.9722	1.35382	0.00119247	2.56194	AT3G58640.2;AT3G58640.1	418;418	848100	3123600	1631100	970490	10011000	6795300	3868300	1576400	0.999994	53.1505	2.98375e-63	173.68	120.11	173.68	1	SIS(1)ITPEIGDDIVR	S(-53)IS(53)IT(-59)PEIGDDIVR	2	0.3738
AT3G58640.2	371	S	19.148	18.6863	19.3834	18.112	18.9377	18.0786	18.6212	18.1995	-0.373175	0.798212	0.0752779	AT3G58640.2;AT3G58640.1	371;371	498100	804020	0	258500	1278400	432690	0	230660	0.99915	32.468	9.01179e-07	92.925	75.983	54.7	1	TASSS(0.001)PEHLS(0.999)FR	T(-53)AS(-39)S(-39)S(-32)PEHLS(32)FR	2	0.49457
AT3G58730.1	241	S	20.0567	19.4097	19.7777	20.5098	19.2036	19.1273	19.064	19.6056	-0.68835	1.70747	0.00860201	AT3G58730.1	241	935150	1327500	844230	0	1537100	0	583520	611300	1	52.255	0.000325792	82.75	38.373	52.255	1	GIS(1)INAAR	GIS(52)INAAR	2	-0.11629
AT3G59290.1	285	S	19.1798	18.9875	19.279	18.98	18.9137	18.9618	19.5929	19.041	0.020775	0.263017	0.342692	AT3G59290.1	285	509200	990700	597470	471800	1257300	798090	0	413340	0.999973	48.6472	3.71558e-05	71.974	49.539	68.369	1	KFS(1)EQNIGAAPPSYEEAVSESR	KFS(49)EQNIGAAPPS(-49)Y(-49)EEAVS(-66)ES(-68)R	3	0.82698
AT3G59350.5	95	S	18.9106	18.7129	19.235	17.3986	18.7582	12.1173	13.2313	14.4111	-3.9348	1.69665	0.00882134	AT3G59350.5;AT3G59350.4;AT3G59350.2;AT3G59350.3;AT3G59350.1;AT3G59350.6	95;95;53;95;95;110	0	818970	0	157660	1128800	0	0	0	0.993555	21.8796	0.00265794	42.083	32.651	42.083	1	EPPS(0.994)IDVPALS(0.006)LDELK	EPPS(22)IDVPALS(-22)LDELK	2	0.79426
AT3G59770.2	1184	S	21.5717	21.3559	21.7103	21.7536	20.798	21.392	21.1526	20.7568	-0.573025	2.06474	0.00375766	AT3G59770.2;AT3G59770.4;AT3G59770.1;AT3G59770.3	1184;1206;1409;1425	2672600	5115500	3222700	3226400	4641700	4301200	2482000	1357700	0.999546	33.4314	7.23452e-21	127.01	119.21	94.707	1	RAS(1)FGATIENDPCIHAK	RAS(33)FGAT(-33)IENDPCIHAK	3	-0.16253
AT3G60240.2	981	S	18.7229	17.5009	16.6061	16.1983	17.7015	17.276	15.7223	19.1765	0.212025	0.230034	0.385944	AT3G60240.2;AT3G60240.3;AT3G60240.4	981;983;985	371000	353530	93691	68612	542670	248070	57558	0	1	43.0241	0.0264793	43.024	21.467	43.024	1	LDRRPS(1)NVAGDDR	LDRRPS(43)NVAGDDR	3	-0.16928
AT3G60240.2	1525	S	19.8923	20.0796	19.4683	19.2297	19.2794	20.5445	18.5735	20.4174	0.036225	0.278062	0.325281	AT3G60240.2;AT3G60240.3;AT3G60240.4	1525;1527;1529	834400	2112000	0	560970	1620000	0	415360	0	0.996733	24.8606	2.4191e-20	126.48	74.938	126.48	1	QVLQGPSAT(0.003)VNS(0.997)PR	QVLQGPS(-49)AT(-25)VNS(25)PR	2	0.43689
AT3G60600.2	149	S	21.9208	22.3114	22.4873	22.3336	22.4956	22.5763	22.1951	22.0693	0.0708	0.184515	0.460749	AT3G60600.2;AT3G60600.3;AT3G60600.1	149;149;149	3404200	9920700	5522300	4822800	15056000	9775200	5112400	3372300	0.999996	52.1871	6.29399e-48	154.4	140.53	154.4	2	VTYVAPPRPPS(1)PVHEGS(0.345)EEGS(0.362)S(0.293)PR	VT(-90)Y(-63)VAPPRPPS(52)PVHEGS(-0.21)EEGS(0.21)S(-0.92)PR	3	-0.032868
AT3G60600.2	155	S	21.9208	22.3114	23.2215	22.0501	22.4956	11.7834	13.372	14.3103	-6.88563	1.8396	0.00632927	AT3G60600.2;AT3G60600.3;AT3G60600.1	155;155;155	3404200	9920700	0	0	15056000	0	0	0	0.906998	12.6282	1.78186e-37	142.59	132.07	114.63	1;2	VTYVAPPRPPS(1)PVHEGS(0.907)EEGS(0.05)S(0.044)PR	VT(-70)Y(-62)VAPPRPPS(43)PVHEGS(13)EEGS(-13)S(-13)PR	3	0.054221
AT3G60750.2	427	S	19.4406	19.3603	19.8087	19.6494	19.5564	19.6905	19.5546	19.7513	0.07345	0.136555	0.568968	AT3G60750.2;AT3G60750.1	427;428	610130	1282800	862560	750380	1963000	1322500	819900	676290	0.985355	18.352	1.0432e-09	109.79	95.973	100.45	1	ALPTYTPES(0.985)PGDAT(0.014)R	ALPT(-71)Y(-70)T(-36)PES(18)PGDAT(-18)R	2	-0.10058
AT4G00100.1	22	S	19.3068	18.7762	17.9705	18.2938	13.1875	14.2545	14.9885	13.3762	-4.63515	4.3104	2.1281e-05	AT3G60770.1;AT4G00100.1	22;22	556090	855700	0	293230	0	0	0	0	0.866717	8.24014	1.04212e-05	99.568	36.493	60.518	1	RS(0.13)S(0.867)PS(0.003)WLK	RS(-8.2)S(8.2)PS(-24)WLK	2	-1.6888
AT3G61050.2	492	S	13.4376	16.3101	14.1719	14.0704	17.7435	16.9469	18.1702	20.2053	3.76897	0.00149175	2.46487	AT3G61050.2;AT3G61050.1	492;492	0	154870	0	0	558700	197460	0	0	0.785693	6.03877	7.17054e-06	83.617	58.764	45.723	1;2	RS(0.786)GS(0.437)S(0.408)T(0.367)PVNT(0.002)VPENDGAK	RS(6)GS(0.58)S(-0.58)T(-1.2)PVNT(-26)VPENDGAK	2	0.04771
AT3G61130.1	8	S	18.9638	17.0529	17.8034	15.9665	17.7034	11.4109	11.0554	11.9103	-4.42665	1.70051	0.00874246	AT3G61130.1	8	438420	259160	0	58426	543380	0	0	0	1	73.985	0.000939836	73.985	26.382	73.985	1	RGLS(1)GVNR	RGLS(74)GVNR	2	0.014798
AT3G61260.1	13	S	21.9215	21.2267	20.9955	20.9485	21.7537	21.235	21.1193	21.0861	0.025475	0.271112	0.333162	AT3G61260.1	13	3405900	4677400	1963500	1846500	9002200	0	2425400	1705800	1	71.9222	3.4154e-147	201.46	162.89	193.28	1	IALESES(1)PAK	IALES(-72)ES(72)PAK	2	0.35972
AT3G61470.1	164	S	17.1811	17.8858	17.0761	16.9598	17.2904	19.5257	17.1956	16.5354	0.361075	0.160075	0.511043	AT3G61470.1;AT5G28450.1	164;80	127420	461650	129770	116310	408120	0	0	72784	0.998636	28.6473	5.45148e-05	80.522	64.631	80.522	1	PGS(0.999)VNT(0.001)DPVFPNNK	PGS(29)VNT(-29)DPVFPNNK	2	-1.4534
AT3G61690.2	773	S	17.3007	17.1275	16.9708	16.5487	16.7035	15.4858	12.8568	12.7309	-2.54268	1.66115	0.00958122	AT3G61690.2;AT3G61690.3;AT3G61690.1	773;773;773	138430	272920	120640	87473	271700	0	0	0	0.875976	8.48987	0.00105779	51.211	39.363	45.915	1	GDDLENS(0.124)HS(0.876)PVR	GDDLENS(-8.5)HS(8.5)PVR	2	0.14233
AT3G61690.2	498	S	12.897	21.0729	13.4968	13.9374	21.0822	21.6894	20.8729	20.477	5.67935	0.00571717	1.88347	AT3G61690.2;AT3G61690.3;AT3G61690.1	498;498;498	0	4204600	0	0	5652200	0	2044500	0	0.922156	11.9143	2.98215e-16	119.88	103.75	81.553	1	T(0.059)RS(0.922)S(0.018)PELTETHGEALLQSR	T(-12)RS(12)S(-17)PELT(-39)ET(-52)HGEALLQS(-78)R	3	-0.0094691
AT3G61860.1	191	S	13.0731	13.7625	14.4227	15.0313	18.058	16.7737	17.5474	16.3593	3.1122	0.000337578	3.1094	AT3G61860.1	191	0	0	0	30556	694770	0	0	64421	1	95.3255	1.18532e-20	135.43	95.077	135.43	1	RPS(1)PDYGR	RPS(95)PDY(-95)GR	2	-0.076361
AT3G61860.1	181	S	18.8024	18.0526	18.0447	17.8875	18.0116	17.188	17.3726	17.8589	-0.589025	1.38235	0.0183907	AT3G61860.1	181	392000	518230	253960	221260	672780	233380	0	182160	0.999958	43.8061	0.00476959	52.579	31.279	52.579	2	RS(1)LS(1)PVYR	RS(44)LS(36)PVY(-36)R	2	-0.25456
AT3G61860.1	183	S	18.8024	18.0526	18.0447	17.8875	18.0116	17.188	17.0948	17.8589	-0.658475	1.41028	0.0172219	AT3G61860.1	183	392000	518230	253960	221260	672780	233380	0	182160	0.999743	35.9076	0.00476959	52.579	31.279	52.579	2	RS(1)LS(1)PVYR	RS(44)LS(36)PVY(-36)R	2	-0.25456
AT3G61860.1	255	S	17.4963	16.4154	19.0588	15.345	16.9298	13.778	18.8448	19.2266	0.115925	0.275706	0.327922	AT3G61860.1	255	158530	166600	0	37978	317860	21956	0	0	0.969252	14.8461	0.00623998	55.353	21.681	47.067	2	Y(0.061)RS(0.969)RS(0.969)PVPR	Y(-15)RS(15)RS(15)PVPR	2	0.23598
AT3G61860.1	257	S	17.4963	16.4154	17.6718	15.345	16.9298	13.778	12.7189	17.8913	-1.40263	0.771448	0.0805344	AT3G61860.1	257	158530	166600	0	37978	317860	21956	0	0	0.99181	20.6603	0.00623998	55.353	21.681	55.353	2	Y(0.047)RS(0.962)RS(0.992)PVPR	Y(-14)RS(14)RS(21)PVPR	2	0.19028
AT3G62240.1	526	S	20.4421	20.6663	20.3453	19.9634	20.2416	18.6724	19.7327	19.7776	-0.7482	1.3729	0.0188041	AT3G62240.1	526	1221500	3171900	1251200	932830	3156300	0	927630	0	0.955214	13.6763	2.09352e-38	148.7	128.69	148.7	1	IPHSS(0.041)S(0.955)APNLS(0.004)DTR	IPHS(-45)S(-14)S(14)APNLS(-24)DT(-38)R	2	0.2472
AT3G62240.1	397	S	20.3026	20.6092	20.6437	20.3682	20.6789	20.594	20.3924	20.3823	0.030975	0.21938	0.40167	AT3G62240.1	397	1108900	3048700	1538700	1235000	4273900	2473900	1465400	1047300	0.999588	33.8465	8.16163e-21	132.86	94.668	132.86	1	YLQAVGS(1)FGGGGSR	Y(-94)LQAVGS(34)FGGGGS(-34)R	2	2.2012
AT3G62700.1	894	S	22.1645	21.4612	20.7951	20.8124	21.453	21.0353	20.4847	20.6467	-0.403375	0.768214	0.0811962	AT3G62700.1	894	4030800	5503000	1708900	1680200	7308800	3359100	1562200	1258000	0.99999	50.1959	3.2844e-28	143.03	75.137	143.03	1	SIS(1)IESPR	S(-50)IS(50)IES(-66)PR	2	0.64403
AT3G62700.1	897	S	14.004	17.2638	14.2043	12.8676	15.3044	16.105	15.9057	16.3914	1.3417	0.0493971	0.968547	AT3G62700.1	897	0	299960	0	0	0	110170	65362	0	0.97364	15.6879	0.00240065	45.161	16.434	45.161	1	SIS(0.026)IES(0.974)PR	S(-41)IS(-16)IES(16)PR	2	-0.21836
AT3G62900.3	1091	S	17.7363	17.6846	18.1591	17.4324	17.628	17.7804	17.5881	17.8433	-0.04315	0.398247	0.221644	AT3G62900.3;AT3G62900.2;AT3G62900.1	1091;1091;1091	187220	401550	274920	161400	515710	351890	209780	180200	0.915296	10.7793	0.0138651	44.188	29.769	44.188	1	S(0.007)NIADLAS(0.915)PS(0.076)RPPS(0.001)R	S(-21)NIADLAS(11)PS(-11)RPPS(-30)R	2	-0.34877
AT3G63000.1	104	S	20.2446	19.8499	19.6352	19.5475	19.976	19.3686	19.6086	19.4662	-0.21445	0.775946	0.0796236	AT3G63000.1	104	1065200	1801100	764810	699190	2625600	1058000	851160	555020	0.999999	58.4754	2.88461e-10	112.5	103.54	112.5	1	GGPAVTPAGS(1)FGR	GGPAVT(-58)PAGS(58)FGR	2	1.0056
AT3G63400.4	538	S	20.7961	20.2069	19.982	19.7851	20.3447	19.418	19.5668	19.8009	-0.409925	0.960459	0.0503817	AT3G63400.4;AT3G63400.3;AT3G63400.1;AT3G63400.2	538;538;538;355	1561200	2306800	972630	824380	3390200	1094900	826830	699940	1	80.2397	0.00111822	80.24	35.793	80.24	1	LGPQRS(1)PIR	LGPQRS(80)PIR	2	-0.11864
AT3G63400.4	199	S	18.7013	17.5352	17.669	17.8786	16.9644	17.8199	18.3483	18.7631	0.0279	0.281661	0.321303	AT3G63400.4;AT3G63400.3;AT3G63400.1;AT3G63400.2	199;199;199;199	0	362040	195730	219890	325560	0	355310	0	1	50.0878	5.17802e-05	67.08	61.766	50.088	1;2	NFS(1)PGDVS(1)DREAK	NFS(50)PGDVS(50)DREAK	2	0.47287
AT3G63400.4	204	S	17.1146	16.1156	16.3874	17.5021	17.8349	15.9191	17.8569	17.1493	0.410125	0.12159	0.612265	AT3G63400.4;AT3G63400.3;AT3G63400.1;AT3G63400.2	204;204;204;204	121680	0	80514	169390	595240	96849	252760	111390	1	50.0878	1.48527e-05	94.688	84.907	50.088	1;2	NFS(1)PGDVS(1)DREAK	NFS(50)PGDVS(50)DREAK	2	0.47287
AT3G63400.4	403	S	18.2689	17.9194	17.7557	17.5454	17.9764	17.7127	18.7453	17.016	-0.00975	0.309435	0.292784	AT3G63400.4;AT3G63400.3;AT3G63400.1	403;403;403	270830	472500	0	174540	656550	335750	0	101560	0.893178	9.36854	0.0028185	51.211	29.165	41.644	2	S(0.107)FRS(0.893)PS(0.859)PS(0.141)GVPK	S(-9.4)FRS(9.4)PS(8)PS(-8)GVPK	2	0.41161
AT3G63400.4	405	S	18.2689	17.9194	18.0482	17.5454	17.9764	17.7127	17.2999	17.016	-0.444225	1.15295	0.0316646	AT3G63400.4;AT3G63400.3;AT3G63400.1	405;405;405	270830	472500	0	174540	656550	335750	0	101560	0.970376	17.0324	0.0028185	51.211	29.165	51.211	2	S(0.4)FRS(0.612)PS(0.97)PS(0.018)GVPK	S(-1.9)FRS(1.9)PS(17)PS(-18)GVPK	2	0.85386
AT3G63460.3	471	S	20.1434	18.7658	19.5944	18.9995	19.0494	19.2928	19.2387	19.7758	-0.0366	0.337601	0.267301	AT3G63460.3;AT3G63460.2;AT3G63460.1	471;479;481	993060	849610	743460	478240	1381300	1003900	0	687860	0.984269	17.9635	1.60636e-50	167.55	156.72	94.551	1	DQAVDGLS(0.984)S(0.016)DLNGIR	DQAVDGLS(18)S(-18)DLNGIR	2	-0.61888
AT3G63460.3	954	S	21.6769	21.1204	21.4185	21.4603	11.4654	19.8943	13.4869	13.6285	-6.80025	2.30524	0.00215597	AT3G63460.3;AT3G63460.2;AT3G63460.1	954;962;964	0	4345100	2632500	2632800	0	1523200	0	0	0.790731	5.96687	1.24455e-35	117.01	111.21	117.01	1	S(0.009)VQPAS(0.791)PPT(0.2)QQAAAQAAPAPATPPPTVQTADTSNVPAHQK	S(-19)VQPAS(6)PPT(-6)QQAAAQAAPAPAT(-72)PPPT(-83)VQT(-95)ADT(-110)S(-110)NVPAHQK	4	0.39033
AT4G00355.4	150	S	17.8978	16.7938	18.0541	18.0951	20.6913	20.2875	19.8269	19.7568	2.43042	0.000144644	3.47749	AT4G00355.4;AT4G00355.3;AT4G00355.2;AT4G00355.1	150;150;150;150	209400	0	255610	0	4310700	2000400	990230	678870	0.899392	13.9352	3.70668e-18	99.226	91.095	65.155	1	AIGGSHVYEPVEEPT(0.033)EPVS(0.899)PS(0.031)DVT(0.036)LDLNPIK	AIGGS(-50)HVY(-44)EPVEEPT(-14)EPVS(14)PS(-15)DVT(-14)LDLNPIK	3	0.30329
AT4G00752.1	224	S	18.2272	18.6373	19.2674	19.0344	18.7703	18.3092	18.8449	18.6013	-0.16015	0.554988	0.141836	AT4G00752.1	224	263110	777170	592680	489950	1138300	507660	501320	304750	0.999328	32.4556	4.08827e-10	112.15	93.842	92.063	1	YSLDNNPSS(0.001)VLS(0.999)PR	Y(-86)S(-86)LDNNPS(-40)S(-32)VLS(32)PR	2	-0.071707
AT4G01290.2	359	S	18.4949	17.1954	18.7703	18.4031	17.3185	18.0615	18.2246	18.3576	-0.225375	0.5156	0.158059	AT4G01290.2;AT4G01290.1	359;360	316750	0	419930	316300	0	427590	326120	257380	0.939962	11.9468	5.2797e-05	88.087	63.295	70.17	1	IGS(0.94)S(0.06)EMLIEGEDVR	IGS(12)S(-12)EMLIEGEDVR	2	-0.064192
AT4G01290.2	704	S	12.0058	14.4184	17.8013	14.4775	16.5946	15.8414	16.6118	16.947	1.82295	0.0418147	1.03719	AT4G01290.2;AT4G01290.1	704;705	0	0	214530	0	251960	91768	106630	96818	0.99999	50.193	0.00102555	54.549	33.679	54.549	1	S(1)IGELSQR	S(50)IGELS(-50)QR	2	0.51848
AT4G01290.2	431	S	19.5255	19.9097	19.9069	19.4272	19.3269	19.2776	18.9247	20.4527	-0.19685	0.52367	0.154563	AT4G01290.2;AT4G01290.1	431;432	647100	1877400	923300	643240	1674300	993330	529820	0	0.999929	41.5217	4.99384e-21	133.71	95.078	133.71	1	S(1)LEHSDGPSILDK	S(42)LEHS(-42)DGPS(-67)ILDK	2	-2.7686
AT4G01290.2	472	S	19.138	18.7947	18.9311	18.8391	18.7086	18.3527	18.3444	18.0517	-0.561375	2.26233	0.00238037	AT4G01290.2;AT4G01290.1	472;473	494660	866780	469450	427900	1090700	523210	354360	208200	0.999967	44.8311	2.02497e-06	99.531	72.227	99.531	1	VEEIRS(1)PQTINK	VEEIRS(45)PQT(-45)INK	2	0.38802
AT4G01480.2	28	S	20.8646	19.7428	19.6794	20.3781	19.9474	19.8275	20.6498	20.4484	0.05205	0.253566	0.354325	AT4G01480.2;AT4G01480.1	28;28	0	1672300	788610	1243500	2574000	0	0	1096400	0.857561	7.8623	4.21326e-05	78.516	8.6915	69.825	1	ILS(0.858)S(0.14)LS(0.002)K	ILS(7.9)S(-7.9)LS(-26)K	2	-0.41024
AT4G02480.1	302	S	21.0682	19.8869	20.6477	20.5989	18.4308	18.7781	19.1318	18.6755	-1.79638	3.4303	0.000161153	AT4G02480.1	302	0	1847900	1542900	0	0	702650	611610	320820	1	48.4048	0.00178637	48.405	41.203	48.405	1	LRS(1)FHLLPPIAK	LRS(48)FHLLPPIAK	3	-0.23639
AT4G02510.4	665	S	21.0681	21.2187	21.0693	21.9155	20.5896	20.9322	21.4883	21.9498	-0.077925	0.378408	0.235376	AT4G02510.4;AT4G02510.3;AT4G02510.2;AT4G02510.1	665;665;665;665	1885100	4651500	2066600	0	4017200	3127400	0	0	0.992332	21.9363	7.478e-19	115.57	98.548	115.57	1	AS(0.001)S(0.006)GIEAHS(0.992)DEANISNNMSDR	AS(-29)S(-22)GIEAHS(22)DEANIS(-82)NNMS(-96)DR	3	-0.22694
AT4G02510.4	448	S	17.6864	17.8003	18.3073	17.7653	16.0143	17.9388	17.7121	17.4741	-0.605	0.933309	0.0538416	AT4G02510.4;AT4G02510.3;AT4G02510.2;AT4G02510.1	448;448;448;448	180860	0	304660	203280	0	392730	228610	139510	1	68.2567	2.88864e-08	93.754	76.473	68.257	1	FDPIGQGEGGEVELES(1)DK	FDPIGQGEGGEVELES(68)DK	2	-0.55318
AT4G02510.4	281	S	18.6006	19.1077	19.2493	18.8462	19.0426	16.6291	18.519	18.6418	-0.742825	0.938061	0.0532182	AT4G02510.4;AT4G02510.3;AT4G02510.2;AT4G02510.1	281;281;281;281	340830	1076800	585290	430020	1374800	0	399960	313420	0.999462	32.6887	5.06021e-05	73.208	64.387	73.208	1	FDQIGDDDS(0.999)GEFEPVS(0.001)DK	FDQIGDDDS(33)GEFEPVS(-33)DK	2	-0.33148
AT4G02510.4	301	S	14.6828	15.7087	14.3766	14.2794	16.5332	15.8782	17.899	17.7708	2.25842	0.00187324	2.36616	AT4G02510.4;AT4G02510.3;AT4G02510.2;AT4G02510.1	301;301;301;301	0	102080	0	0	241450	94140	0	0	0.756327	8.06581	0.00376592	40.589	34.153	40.589	1	FT(0.101)S(0.756)ES(0.118)DS(0.024)IADSSK	FT(-8.7)S(8.1)ES(-8.1)DS(-15)IADS(-35)S(-35)K	2	2.5084
AT4G02510.4	210	S	20.2386	18.0904	19.7108	19.0549	20.4706	20.1233	20.2684	19.6374	0.85125	0.0307472	1.16526	AT4G02510.4;AT4G02510.3;AT4G02510.2;AT4G02510.1	210;210;210;210	1060800	531960	805940	496960	3699100	1785200	1344700	624950	1	86.1862	3.73452e-06	88.311	81.927	88.311	1	S(1)DNVIEEEGVELTDK	S(86)DNVIEEEGVELT(-86)DK	2	-0.58641
AT4G02510.4	71	S	21.3519	20.4259	19.9306	19.3386	20.8905	19.1149	19.4704	19.4834	-0.52195	0.696264	0.0975891	AT4G02510.4;AT4G02510.3;AT4G02510.2;AT4G02510.1	71;71;71;71	2294900	2685000	938560	604940	4949100	887400	773420	561650	0.994536	22.6014	1.34417e-78	186.17	115.23	182.1	1	VGADDLS(0.995)DS(0.005)EK	VGADDLS(23)DS(-23)EK	2	0.31498
AT4G02510.4	589	S	21.923	21.2815	21.9888	21.5871	21.905	23.3045	22.9592	21.367	0.688825	0.0460302	0.997553	AT4G02510.4;AT4G02510.3;AT4G02510.2;AT4G02510.1	589;589;589;589	3409400	4858700	3908900	2874600	9998100	16193000	0	2072500	1	41.0524	3.30743e-83	183.25	175.62	41.052	1	VVEGDS(1)AEEDENK	VVEGDS(41)AEEDENK	2	-2.3644
AT4G02770.1	84	S	21.748	21.7544	21.3698	21.9339	22.691	22.6185	22.085	21.8417	0.607525	0.00949998	1.6648	AT4G02770.1;AT1G03130.1	84;80	0	6743300	2545100	3655700	17239000	10065000	4736800	2880100	0.819843	6.58115	5.51587e-52	147.76	138.38	122.35	1	EAPVGFTPPQLDPNTPSPIFAGS(0.82)T(0.18)GGLLR	EAPVGFT(-110)PPQLDPNT(-70)PS(-47)PIFAGS(6.6)T(-6.6)GGLLR	3	0.60682
AT4G03080.1	491	S	20.2428	20.1943	20.4384	19.671	19.8622	20.2663	19.4793	19.5638	-0.343725	0.988903	0.0470081	AT4G03080.1	491	1063900	2286800	1334600	761670	2426400	1971200	778180	593860	1	146.741	1.36061e-64	179.67	149.67	179.67	1	QLS(1)LDQFQNESR	QLS(150)LDQFQNES(-150)R	2	0.1197
AT4G03260.4	91	S	11.4353	12.6409	14.3879	13.3873	18.3533	17.7167	17.6533	17.7313	4.9008	5.81994e-05	3.87393	AT4G03260.4;AT4G03260.3;AT4G03260.2;AT4G03260.1	91;91;91;91	0	0	0	0	852610	336690	219490	166740	0.958832	13.6865	0.000654635	54.276	42.11	54.276	1	S(0.041)QS(0.959)HGNELYLDGR	S(-14)QS(14)HGNELY(-38)LDGR	2	1.4819
AT4G03390.2	452	S	17.5925	17.4534	17.0436	17.2325	17.4671	16.9961	17.0958	17.4316	-0.08285	0.493519	0.168119	AT4G03390.2;AT4G03390.1	452;452	169460	342090	126880	140510	461270	0	149140	135460	0.999691	35.0987	0.0018053	50.897	40.609	50.897	1	VTVMPIIS(1)PERPVK	VT(-35)VMPIIS(35)PERPVK	2	0.30843
AT4G03550.1	1053	S	18.011	16.6483	17.8617	17.7207	16.1987	17.9645	17.3313	17.9763	-0.192725	0.441453	0.195087	AT4G03550.1	1053	0	0	223710	197100	0	399790	175580	197610	0.843304	8.00762	9.97475e-05	63.408	43.201	63.408	1	AS(0.018)S(0.843)S(0.133)VS(0.004)T(0.001)LYK	AS(-17)S(8)S(-8)VS(-23)T(-30)LY(-55)K	2	0.5344
AT4G04210.1	181	S	20.6813	20.8218	20.7924	20.7109	21.3253	20.3893	20.843	21.0959	0.161775	0.112471	0.641766	AT4G04210.1	181	1441800	3532800	1705700	1566100	6689800	2146700	2002700	1717500	1	67.7257	1.40186e-13	120.06	97.322	67.726	1	RVS(1)FQGVGR	RVS(68)FQGVGR	2	-0.0077022
AT4G04210.1	22	S	21.9769	20.8502	20.631	20.4546	20.892	20.3718	20.1819	20.4885	-0.494625	0.931488	0.0540826	AT4G04210.1;AT4G22150.1	22;23	0	3603100	1525200	1311200	4954000	2120700	1266500	1127300	1	65.2028	6.32485e-13	113.71	57.275	113.71	1	TLS(1)DLNRR	T(-65)LS(65)DLNRR	2	0.11939
AT4G04720.2	19	S	17.0986	17.3991	17.5789	17.4109	17.0725	17.5128	17.4283	17.0189	-0.11375	0.599897	0.125662	AT4G04720.2;AT4G04720.1	19;19	120340	329450	183880	159010	350890	292320	187790	101760	0.99864	28.6586	0.00112803	44.294	33.955	44.294	1	S(0.999)IPINPVQT(0.001)HVVPEHR	S(29)IPINPVQT(-29)HVVPEHR	3	-0.44133
AT4G04810.2	20	S	13.2145	12.8933	11.8026	12.3884	18.6169	18.3289	19.9684	19.4327	6.51203	2.17148e-06	5.27194	AT4G04810.2;AT4G04830.1;AT4G04810.1;AT4G21830.2;AT4G21840.1;AT4G21830.1	20;20;20;24;26;27	0	0	0	0	1023500	0	0	542260	1	43.3077	0.00258296	43.308	20.666	43.308	1	AVLS(1)PEQFR	AVLS(43)PEQFR	2	0.06666
AT4G05150.1	277	S	19.2306	19.5374	19.6737	19.5427	19.7266	20.0822	19.7471	19.8736	0.361275	0.00596059	1.86546	AT4G05150.1	277	527460	1450400	785480	696890	2208800	1735100	936910	736130	0.977779	17.5151	0.000900177	68.676	49.601	53.252	1	DVPS(0.978)PY(0.017)GS(0.004)T(0.001)SSAPVMR	DVPS(18)PY(-18)GS(-24)T(-32)S(-39)S(-38)APVMR	2	0.81911
AT4G05150.1	263	S	12.9113	14.5029	13.6841	14.3732	17.5515	15.6946	17.1116	18.9635	3.46242	0.000875116	2.69624	AT4G05150.1	263	0	0	0	0	489080	0	150780	0	0.818016	7.39897	0.0021155	55.314	42.759	55.314	2	EVS(0.818)T(0.149)LS(0.035)DPGS(0.998)PRR	EVS(7.4)T(-7.4)LS(-14)DPGS(27)PRR	2	-0.48887
AT4G05150.1	270	S	20.0619	19.5451	20.1365	19.5583	20.4263	19.2166	19.8555	19.7385	-0.016225	0.319704	0.283126	AT4G05150.1	270	938490	1458100	0	704470	3587400	952230	1010000	670310	0.999902	42.2804	1.62281e-38	152.99	123.69	106.01	1;2	EVSTLSDPGS(1)PRR	EVS(-54)T(-45)LS(-42)DPGS(42)PRR	2	-0.052219
AT4G05150.1	221	S	19.2415	17.7538	23.6308	22.6182	19.3059	19.8207	23.1403	21.9599	0.245625	0.254422	0.353247	AT4G05150.1	221	531470	421260	0	5874600	0	1447400	9843900	3126000	0.949147	13.7126	1.42056e-169	230.26	215.45	222.25	1	VRS(0.949)EVS(0.04)S(0.01)IVSEVPDYLFGLDNFDETAPPHELR	VRS(14)EVS(-14)S(-20)IVS(-54)EVPDY(-130)LFGLDNFDET(-210)APPHELR	3	0.13346
AT4G05180.2	125	S	19.6791	20.5815	21.0855	20.6713	20.9198	20.9412	20.7242	20.7008	0.31715	0.0797185	0.775475	AT4G05180.2;AT4G05180.1	125;125	719810	2990700	2090000	1523700	5050400	3146900	1844300	1306000	0.995414	23.3662	7.72419e-77	184.21	171.25	126.1	1	FYIQPLS(0.995)PT(0.005)EAAAR	FY(-78)IQPLS(23)PT(-23)EAAAR	2	0.51715
AT4G08310.1	145	S	18.0241	18.1188	17.7944	18.1383	17.8818	18.122	18.3268	18.2117	0.116675	0.0914217	0.721644	AT4G08310.1	145	228560	542550	213510	263270	614900	445880	350070	232620	1	70.2183	0.000210701	85.42	67.914	85.42	1	DS(1)PVMGLLTEENTSK	DS(70)PVMGLLT(-70)EENT(-85)S(-85)K	2	-0.58433
AT4G09150.1	43	S	15.5904	15.8813	15.96	16.4387	17.9856	17.4712	17.4012	18.9622	1.98745	0.000555383	2.89342	AT4G09150.1;AT4G09150.2	43;43	0	115050	59870	0	660770	284010	184290	0	0.998045	27.0815	0.000220837	62.088	40.716	62.088	1	S(0.998)PVS(0.002)AAEIDSK	S(27)PVS(-27)AAEIDS(-60)K	2	0.19305
AT4G09180.1	34	S	19.4531	18.7468	19.4408	19.2982	19.1115	13.8864	12.2129	14.535	-4.29827	1.86172	0.00601254	AT4G09180.1	34	0	838470	0	588230	1442100	0	0	0	0.953806	13.1487	4.58755e-19	115.63	71.329	115.63	1	IRS(0.954)APAT(0.046)WLEALLEEDEEESLK	IRS(13)APAT(-13)WLEALLEEDEEES(-110)LK	3	-0.08778
AT4G09320.1	117	S	18.9019	18.8609	18.6006	18.7477	19.1263	18.1674	18.7599	19.4454	0.096975	0.201684	0.43006	AT4G09320.1	117	0	907450	0	401630	1456900	0	472620	0	0.99877	29.7877	9.82542e-29	140.08	124.54	140.08	1	NVIHGS(0.999)DS(0.001)VESAR	NVIHGS(30)DS(-30)VES(-37)AR	2	-0.068011
AT4G09320.1	122	S	19.4274	18.5878	18.5166	18.1199	17.1606	17.7115	17.9886	18.3037	-0.871825	1.56167	0.0120818	AT4G09320.1	122	604540	750960	352220	259920	0	335480	276920	247940	0.998094	28.1423	0.000320588	65.225	49.283	65.225	1	NVIHGSDS(0.002)VES(0.998)ARK	NVIHGS(-34)DS(-28)VES(28)ARK	3	-0.18487
AT4G09580.1	37	S	17.608	17.0629	16.3611	16.3465	17.4256	17.0925	16.3223	16.9134	0.093825	0.22706	0.390238	AT4G09580.1	37	171300	260960	79056	76031	448200	218430	87242	94586	0.863615	8.01552	7.68869e-05	69.451	56.097	69.451	1	GLLNDDS(0.864)PT(0.136)GK	GLLNDDS(8)PT(-8)GK	2	0.68395
AT4G10120.3	148	S	20.7211	22.1346	20.0832	21.6197	23.2112	22.4262	22.8581	22.8317	1.69215	0.00282819	2.1877	AT4G10120.3;AT4G10120.2;AT4G10120.1	148;148;148	1482100	8776100	1043300	2940400	24724000	8808700	8094700	5720100	1	71.6498	0	358.85	287.58	322.17	1	NDAEEDLLSELS(1)EGEK	NDAEEDLLS(-72)ELS(72)EGEK	2	-0.36138
AT4G10120.3	180	S	20.6929	20.8212	20.8457	20.5358	20.5946	20.7414	20.6338	20.6149	-0.077725	0.745982	0.0859114	AT4G10120.3;AT4G10120.2;AT4G10120.1;AT4G10120.4	180;180;180;6	1453400	3531400	1769900	1387100	4031200	2740000	1732300	1230500	1	82.699	3.17266e-38	148.57	134.14	147.35	1	IRS(1)EMQIWSEDDK	IRS(83)EMQIWS(-83)EDDK	2	-1.7025
AT4G10120.3	717	S	18.784	17.7477	17.4892	17.1867	18.6888	19.6628	19.2446	16.8601	0.812175	0.069379	0.830784	AT4G10120.3;AT4G10120.2;AT4G10120.1;AT4G10120.4;AT4G10120.5	717;717;717;543;516	0	419490	172800	0	0	1297400	661360	91154	0.962778	14.7741	2.0236e-16	121.47	105.77	121.47	1	VPEELT(0.004)S(0.032)DS(0.963)LRDVDDIS(0.001)LR	VPEELT(-23)S(-15)DS(15)LRDVDDIS(-31)LR	3	-0.10691
AT4G10730.2	511	S	20.2689	18.893	18.7226	18.8006	19.1546	18.5915	18.3208	18.566	-0.51305	0.894507	0.0592321	AT4G10730.2;AT4G10730.1	511;531	0	927860	406280	416630	1485800	617420	348620	297380	0.999679	34.9325	1.15178e-06	89.403	69.197	89.403	1	ASANSLS(1)APIK	AS(-70)ANS(-35)LS(35)APIK	2	0.0081058
AT4G10730.2	346	S	16.6802	14.8924	16.5317	18.3649	12.3194	11.1758	18.9067	14.7648	-2.32563	0.892943	0.0594611	AT4G10730.2;AT4G10730.1	346;366	90042	0	88983	308030	0	0	523260	0	1	44.6158	0.000485719	56.122	47.072	44.616	1	GVS(1)AWNFNIEDLK	GVS(45)AWNFNIEDLK	2	0.37846
AT4G10730.2	494	S	19.9615	20.3791	20.4907	20.067	20.3828	20.5618	20.2981	20.1437	0.122025	0.112024	0.643282	AT4G10730.2;AT4G10730.1	494;514	875430	2599300	1383800	1002300	3480700	2419200	1372700	887690	0.999829	37.6641	2.06934e-28	141.46	104.04	114.74	1	RAPS(1)FSGPLNLPNR	RAPS(38)FS(-38)GPLNLPNR	2	0.30961
AT4G10730.2	559	S	21.1913	20.3634	20.6272	21.3329	20.5682	17.9223	20.1649	21.6184	-0.81025	0.748914	0.0852724	AT4G10730.2;AT4G10730.1	559;579	0	2571100	1521100	0	3958100	0	1251600	0	0.87413	8.41652	5.47336e-07	96.591	82.334	87.18	1	S(0.126)AS(0.874)VGNWILDSK	S(-8.4)AS(8.4)VGNWILDS(-82)K	2	-0.039053
AT4G10750.1	338	S	21.0602	20.7142	20.2686	19.9101	20.6484	19.8963	19.7522	19.7438	-0.4781	1.0015	0.0455915	AT4G10750.1	338	1874800	3278900	1186400	898970	4184400	1525300	940240	672790	0.999536	33.3335	7.12824e-193	250.52	236.57	139.11	1	MGLVNES(1)DSEDSSEHDK	MGLVNES(33)DS(-33)EDS(-66)S(-73)EHDK	3	0.17471
AT4G10840.1	581	S	18.2816	16.874	18.1847	17.8203	15.8598	16.2185	17.7015	17.4634	-0.97935	1.19131	0.0288963	AT4G10840.1	581	0	0	279840	211190	0	0	226950	138480	1	58.4867	0.0022174	59.306	43.734	58.487	1	S(1)LQNLIDPNARPPK	S(58)LQNLIDPNARPPK	2	-0.78544
AT4G11010.1	204	S	12.4184	13.2504	15.4394	15.2227	16.5213	17.4979	17.7353	17.7509	3.29362	0.00133098	2.51421	AT4G11010.1;AT4G23900.1;AT4G23895.3	204;203;433	0	0	0	0	0	289300	0	169020	0.976358	16.1592	0.00021172	68.034	28.768	68.034	1	NIIHGS(0.976)DGPET(0.024)AK	NIIHGS(16)DGPET(-16)AK	2	0.76807
AT4G11270.2	506	S	16.4169	16.1512	17.8721	17.2114	18.9528	18.9812	18.6926	18.1181	1.77327	0.00148609	2.46651	AT4G11270.2;AT4G11270.1	506;506	75021	0	225320	138470	1291800	808860	0	218010	0.96807	15.5747	9.70556e-05	73.156	59.251	46.964	1	FDFLHGIDS(0.968)PAS(0.027)S(0.005)PR	FDFLHGIDS(16)PAS(-16)S(-23)PR	2	-0.75732
AT4G11270.2	1002	S	20.7967	19.9089	20.9641	20.6325	20.4398	20.7191	20.5066	20.7912	0.038625	0.25215	0.356117	AT4G11270.2;AT4G11270.1	1002;1002	1561800	0	1921300	1483300	0	2698000	1586100	1390500	0.999614	34.3552	4.59944e-06	84.289	58.351	84.289	1	SLS(1)GISLNEPK	S(-34)LS(34)GIS(-47)LNEPK	2	0.87856
AT4G11680.1	48	S	17.4924	18.0896	17.5148	17.3436	17.3259	17.0438	17.1188	17.4586	-0.373325	1.31554	0.0215259	AT4G11680.1;AT4G11680.2	48;48	158110	531670	175890	151760	418280	211180	151530	138020	0.909634	10.1706	0.000615856	54.7	42.723	53.683	1	T(0.087)IS(0.91)VDEES(0.003)NPIHR	T(-10)IS(10)VDEES(-25)NPIHR	2	2.717
AT4G11740.2	324	S	18.5523	17.1517	17.969	17.965	17.6815	16.7831	17.6282	17.6852	-0.465	0.907894	0.05731	AT4G11740.2;AT4G11740.1	324;324	329610	277530	240970	233460	535180	176270	215700	161500	0.999999	60.297	0.000360624	79.875	66.471	79.875	1	AASGSLAPPNADRS(1)R	AAS(-69)GS(-60)LAPPNADRS(60)R	2	0.020369
AT4G11740.2	394	S	20.5418	20.78	20.6978	20.0989	21.3681	20.8716	20.5	20.6125	0.308425	0.0594496	0.893021	AT4G11740.2;AT4G11740.1	394;394	1308900	3432000	1597400	1024700	6890900	2998800	1578900	1228500	0.995806	24.093	7.78064e-14	115.82	95.389	95.651	1	AQPRPPS(0.996)PS(0.004)LTAQR	AQPRPPS(24)PS(-24)LT(-35)AQR	2	-0.28549
AT4G11740.2	295	S	16.2667	17.4534	17.3895	17.2146	18.6777	18.7023	18.4927	17.6695	1.3045	0.0026442	2.21682	AT4G11740.2;AT4G11740.1	295;295	67606	342080	161260	138780	1067600	666690	392720	159750	0.977264	19.3433	3.47619e-05	68.653	55.673	68.653	1	LAAPS(0.011)S(0.011)PFDDDS(0.977)DDVDEQPLVR	LAAPS(-19)S(-19)PFDDDS(19)DDVDEQPLVR	2	-0.15548
AT4G11740.2	328	S	19.236	18.7719	18.8905	18.2149	19.3759	18.5348	18.7282	18.5407	0.016575	0.282508	0.320378	AT4G11740.2;AT4G11740.1	328;328	529460	853210	456430	277620	1732100	593600	462360	292220	0.984946	18.1577	1.68719e-38	149	134.58	113.59	1	S(0.015)GS(0.985)PEEEHASINPAER	S(-18)GS(18)PEEEHAS(-75)INPAER	2	0.75527
AT4G11850.1	680	S	18.7221	19.0928	19.6549	19.088	18.6844	18.4111	18.4715	17.9178	-0.76825	1.95015	0.00489857	AT4G11850.1	680	370790	1065700	775340	508500	1072500	544830	387010	0	0.999225	31.4981	2.99615e-05	85.493	68.057	85.493	1	EVPVGTVS(0.001)VYNS(0.999)PR	EVPVGT(-54)VS(-31)VY(-42)NS(31)PR	2	-0.038439
AT4G11860.1	234	S	20.8175	21.0474	21.5015	21.0702	21.0215	21.2385	21.2761	21.2832	0.095675	0.142998	0.551993	AT4G11860.1	234	1584500	4130800	2788500	2009000	5419400	3867200	2703800	1955500	0.999999	59.9892	1.2937e-107	205.68	176.77	101.39	1	S(1)FDDSPPAAAELR	S(60)FDDS(-60)PPAAAELR	2	-0.33541
AT4G12340.1	143	S	18.275	17.0823	17.1916	16.9056	17.7101	16.5363	16.7974	17.1375	-0.3183	0.64153	0.112541	AT4G12340.1	143	271980	264490	140590	112020	545920	148560	121270	110480	1	62.8229	0.000605412	62.823	33.35	62.823	1	ENIGS(1)PLK	ENIGS(63)PLK	2	0.73833
AT4G12610.1	237	S	18.9555	18.9968	19.0714	18.7656	19.1464	18.8814	18.1055	18.3429	-0.328275	0.932171	0.0539921	AT4G12610.1;AT4G12610.2	237;237	435880	997110	517410	406650	1477400	754830	300280	254770	0.995133	23.3025	3.70138e-05	57.262	45.877	52.92	1	SSGGDEEEGNVS(0.995)DRGDEDEEEEAS(0.005)RK	S(-40)S(-40)GGDEEEGNVS(23)DRGDEDEEEEAS(-23)RK	3	-0.22223
AT4G12640.4	124	S	12.6007	18.8522	13.1608	15.1724	16.3737	16.364	17.5485	17.1278	1.90698	0.0542351	0.930339	AT4G12640.4;AT4G12640.3;AT4G12640.2;AT4G12640.1	124;124;124;252	0	902030	0	0	0	0	204100	109740	0.8613	7.93907	0.000885991	52.555	36.022	52.555	1	LGS(0.861)S(0.138)EGYLQDR	LGS(7.9)S(-7.9)EGY(-35)LQDR	2	-0.26359
AT4G12780.6	155	S	20.6574	22.3973	22.36	21.8275	22.0272	22.2972	22.2747	22.2046	0.390375	0.0910332	0.723306	AT4G12770.1;AT4G12770.2;AT4G12780.6;AT4G12780.4;AT4G12780.5;AT4G12780.3;AT4G12780.2;AT4G12780.1	153;153;155;155;155;155;155;155	1418100	10529000	5056000	3395800	10882000	8055400	5402400	3703800	0.97271	16.5256	1.52951e-193	253.06	224.89	237.05	1	FENVFSSISS(0.006)S(0.973)PT(0.022)K	FENVFS(-110)S(-86)IS(-45)S(-22)S(17)PT(-17)K	2	0.071035
AT4G12780.6	285	S	19.8797	17.0057	18.5636	18.6647	15.536	13.6289	15.4273	13.5507	-3.9927	2.89735	0.0005506	AT4G12780.6;AT4G12780.4;AT4G12780.5;AT4G12780.3;AT4G12780.2;AT4G12780.1	285;285;312;285;285;312	827140	0	0	379180	0	0	0	0	0.929605	11.8003	6.43269e-11	93.767	83.885	93.767	1;2	SHLRPPGNIS(0.001)GS(0.007)QS(0.93)PPVES(0.061)PGS(0.001)YHSK	S(-62)HLRPPGNIS(-28)GS(-22)QS(12)PPVES(-12)PGS(-31)Y(-39)HS(-42)K	4	0.034103
AT4G12780.6	290	S	18.6182	18.4151	18.6587	19.893	19.024	19.1174	20.0789	18.9701	0.40135	0.0923447	0.717727	AT4G12780.6;AT4G12780.4;AT4G12780.5;AT4G12780.3;AT4G12780.2;AT4G12780.1	290;290;317;290;290;317	345010	666250	388690	888380	1357200	888940	0	393520	0.929076	14.272	4.25979e-08	79.365	70.516	79.365	1;2	SHLRPPGNISGSQS(0.001)PPVES(0.929)PGS(0.035)YHS(0.035)K	S(-70)HLRPPGNIS(-47)GS(-37)QS(-31)PPVES(14)PGS(-14)Y(-33)HS(-14)K	4	-0.013495
AT4G13010.1	197	S	21.801	23.3523	20.0141	22.8962	23.6668	24.4523	24.2575	23.5673	1.97007	0.00959365	1.6606	AT4G13010.1	197	3133100	20411000	994530	7122800	33906000	35880000	21354000	9524700	1	43.7983	1.26447e-05	63.037	36.008	43.798	3	NIEFVKS(1)LGADEVLDY(1)KT(1)PEGAALK	NIEFVKS(44)LGADEVLDY(44)KT(44)PEGAALK	2	-1.4057
AT4G13350.2	219	S	21.143	20.5719	20.5141	20.5305	20.1796	19.7804	19.7839	20.083	-0.73315	2.45123	0.00153926	AT4G13350.2;AT4G13350.1	219;219	1985500	2970900	1406500	1382000	3023500	1407500	961120	851070	0.999999	60.6887	1.23537e-40	155.48	123.26	153.95	1	DLGSAS(1)PPVAR	DLGS(-61)AS(61)PPVAR	2	0.10473
AT4G13350.2	407	S	16.9515	17.2423	17.561	16.8093	15.3407	17.3486	16.3142	16.9159	-0.661175	0.98821	0.0470875	AT4G13350.2;AT4G13350.1	407;407	108670	295520	181620	104790	0	260870	86756	0	0.827536	7.81327	2.65624e-06	69.578	63.611	51.348	1	S(0.137)MS(0.828)APS(0.035)LQPLQGVPSGGLQSSEVK	S(-7.8)MS(7.8)APS(-14)LQPLQGVPS(-47)GGLQS(-47)S(-47)EVK	2	1.1108
AT4G13350.2	180	S	20.8103	19.9117	20.5616	20.2224	20.0305	19.7219	19.9854	20.152	-0.40405	1.25642	0.0247562	AT4G13350.2;AT4G13350.1	180;180	0	1880000	1453500	1116300	2726700	1351600	1105200	892800	1	45.9965	2.87332e-28	139.78	80.713	45.997	1	S(1)PARPEILNDWR	S(46)PARPEILNDWR	2	-0.045498
AT4G13510.1	475	S	19.4242	19.3604	19.3554	18.9423	19.2589	19.7977	20.2344	20.8842	0.773225	0.0168443	1.41973	AT4G13510.1	475	603220	1282900	629960	459630	1597200	1424500	0	0	0.999942	42.3782	1.51495e-06	92.307	84.503	92.307	1	HGGFAYMYFDDDES(1)HK	HGGFAY(-74)MY(-42)FDDDES(42)HK	3	-0.11295
AT4G14200.1	753	S	18.4177	17.9781	18.7388	18.2249	14.9362	13.333	13.375	13.7118	-4.50088	4.78056	7.38307e-06	AT4G14200.1	753	0	0	410860	279550	0	0	0	0	0.999999	60.2749	2.00685e-06	91.914	58.229	91.914	1	REVSEEWNS(1)PAK	REVS(-60)EEWNS(60)PAK	2	0.96629
AT4G14200.1	639	S	19.3091	18.262	17.3076	14.9248	12.9054	10.2827	12.3971	13.6998	-5.12963	2.60378	0.00108274	AT4G14200.1	639	0	599150	0	28381	0	0	0	0	0.999947	42.2648	0.000277709	60.49	19.9	60.49	2	S(1)LVS(0.166)S(0.817)PLVT(0.017)R	S(42)LVS(-6.9)S(6.9)PLVT(-17)R	2	0.096555
AT4G14200.1	643	S	14.0193	11.3076	14.1684	14.9248	19.2341	22.3841	20.8821	19.0137	6.77348	0.000197649	3.34206	AT4G14200.1	643	0	0	0	28381	1570000	0	0	405600	0.875428	8.4823	1.51381e-07	90.653	41.303	90.653	1;2	SLVS(0.124)S(0.875)PLVTR	S(-67)LVS(-8.5)S(8.5)PLVT(-33)R	2	-0.41294
AT4G14270.2	31	S	16.8517	15.6124	16.8737	16.8415	12.3608	13.1587	12.6466	13.9348	-3.5196	3.86199	5.95024e-05	AT4G14270.2;AT4G14270.1	31;31	101410	0	112790	0	0	0	0	0	1	46.1582	0.00203181	46.158	24.072	46.158	1	EVEDFS(1)PK	EVEDFS(46)PK	2	3.4897
AT4G15020.2	122	S	18.2068	18.7011	19.1127	18.5042	18.4722	18.4349	18.4732	18.4535	-0.17275	0.700386	0.0965567	AT4G15020.2;AT4G15020.1	122;122	259410	812330	532430	339270	925830	553890	387460	275070	0.998985	29.9883	1.20365e-51	163.7	149.8	134.44	1	S(0.999)PGS(0.001)SDVVVQNESLLSGR	S(30)PGS(-30)S(-49)DVVVQNES(-120)LLS(-130)GR	2	-0.11324
AT4G15240.1	19	S	13.6242	12.2708	13.8344	16.9794	18.5555	19.9719	17.4828	17.8844	4.29645	0.00199451	2.33898	AT4G15240.1	19	0	0	0	117900	980830	0	195020	185410	0.881912	8.73218	0.014319	45.257	28.231	45.257	1	LDS(0.882)LS(0.118)PEMLFPAK	LDS(8.7)LS(-8.7)PEMLFPAK	2	1.1528
AT4G15545.1	217	S	19.7432	20.8764	20.845	20.2288	21.2806	21.3525	21.0044	20.237	0.545275	0.0442021	1.01426	AT4G15545.1	217	752490	3669200	1769000	1121200	6485400	4185100	2239700	946960	0.99981	40.2009	1.94625e-10	100.41	79.825	100.41	1;2	LTPPGS(1)PPILSASGTPK	LT(-42)PPGS(40)PPILS(-40)AS(-49)GT(-49)PK	2	0.39963
AT4G15545.1	240	S	19.0704	17.4124	18.5392	18.2822	18.3796	17.8595	17.3935	18.0761	-0.398875	0.74365	0.086423	AT4G15545.1	240	472040	0	0	290870	868250	371730	183310	211750	0.950004	12.8033	0.00201022	47.189	38.868	47.189	1	RHS(0.95)VS(0.05)FATTR	RHS(13)VS(-13)FAT(-40)T(-40)R	3	0.14838
AT4G15545.1	2	S	18.0694	18.626	19.3753	18.9074	18.3088	18.493	18.7178	18.3152	-0.285825	0.742828	0.0866042	AT4G15545.1	2	235850	771120	638710	448670	826720	576660	459030	249920	1	107.321	9.21732e-32	146.76	133.78	142.01	1	S(1)EIEEEEEEGSASAITGSR	S(110)EIEEEEEEGS(-110)AS(-120)AIT(-130)GS(-140)R	2	-0.72799
AT4G15545.1	12	S	17.2095	17.2027	18.0992	17.661	17.7722	17.9712	18.0885	18.4094	0.517225	0.019143	1.36532	AT4G15545.1	12	129950	287510	263730	189110	569910	401640	296770	266790	0.986874	18.8633	4.35675e-23	133.45	119.41	133.45	1	SEIEEEEEEGS(0.987)AS(0.013)AITGSR	S(-100)EIEEEEEEGS(19)AS(-19)AIT(-36)GS(-45)R	2	-0.14657
AT4G15545.1	235	S	20.6654	18.5424	18.2807	17.6645	19.9876	17.3284	18.7032	18.1726	-0.2403	0.404093	0.217795	AT4G15545.1	235	1426000	727700	299100	189570	2646700	257230	454430	226400	0.999645	37.7191	1.12878e-06	102.06	65.476	54.683	1;2	T(0.132)T(0.169)S(0.699)RPIS(1)PR	T(-7.3)T(-6.2)S(6.2)RPIS(38)PR	2	-0.037264
AT4G15930.2	33	S	19.7582	19.9653	19.9665	19.5202	19.3219	19.2779	19.0085	19.1186	-0.620825	2.83881	0.000629749	AT4G15930.2;AT4G15930.1	33;33	760340	1951100	962220	686110	1668500	993570	561520	436190	1	74.879	3.01374e-05	85.457	63.371	84.566	1	SSLPEVEAS(1)PPAGK	S(-75)S(-75)LPEVEAS(75)PPAGK	2	0.40346
AT4G16146.1	48	S	15.3599	21.9085	20.884	23.4806	22.8012	22.3392	22.5097	22.0101	2.0068	0.0708187	0.822565	AT4G16146.1	48	36057	7503400	1817500	10680000	18608000	8293200	6358100	3236700	1	113.767	7.32198e-27	116.01	93.29	113.77	1	AFFDS(1)ADWALLK	AFFDS(110)ADWALLK	2	-0.45072
AT4G16340.2	1095	S	18.3588	18.6075	18.5794	19.5156	19.0454	19.2954	18.6719	20.853	0.7011	0.0566885	0.912325	AT4G16340.2;AT4G16340.1	1095;1095	0	761300	367890	0	1377500	1005700	444660	0	0.959919	16.7447	9.80692e-05	73.022	57.483	63.709	1	VNS(0.019)QLAS(0.96)PS(0.02)QPYS(0.001)LR	VNS(-17)QLAS(17)PS(-17)QPY(-42)S(-32)LR	2	0.57699
AT4G16630.1	11	S	16.2054	16.9441	16.0124	17.4019	17.2996	17.4084	17.7196	17.0761	0.734975	0.01785	1.39504	AT4G16630.1	11	0	240340	62084	158020	410710	271910	229810	105880	1	71.7027	8.74749e-16	115.5	93.455	115.5	1	PSSFFFEDAS(1)DDELELIR	PS(-72)S(-72)FFFEDAS(72)DDELELIR	2	-0.5295
AT4G17060.1	77	S	18.0573	17.0762	18.3139	18.4717	17.9245	18.1157	19.5929	17.4642	0.29455	0.159804	0.511651	AT4G17060.1	77	233880	0	0	331710	633390	443960	0	138560	0.980769	19.3208	0.000136063	66.285	44.728	66.285	1	S(0.011)EFDS(0.981)DHDS(0.006)GS(0.001)GFGLK	S(-19)EFDS(19)DHDS(-22)GS(-29)GFGLK	2	-0.41214
AT4G17330.3	191	S	19.4291	19.4916	19.714	19.4505	19.8711	19.7755	19.6362	19.73	0.2319	0.00648794	1.82892	AT4G17330.3;AT4G17330.2;AT4G17330.1	191;191;191	605250	1405100	807720	653750	2441500	1402800	867600	666360	0.999769	36.3645	1.0824e-38	154.65	138.76	147.35	1	DDS(1)PTAVEEASVEEK	DDS(36)PT(-36)AVEEAS(-110)VEEK	2	0.10396
AT4G17330.3	1461	S	18.9509	19.3668	18.7348	20.2919	19.4208	18.9432	18.7836	18.7992	-0.3494	0.712272	0.0936472	AT4G17330.3;AT4G17330.2;AT4G17330.1	1461;1496;1496	434510	1288600	0	0	1786800	787850	480470	349560	0.968994	15.8455	2.51497e-05	86.467	68.802	86.467	1	ETVS(0.001)T(0.025)S(0.969)EGT(0.004)FAGPK	ET(-43)VS(-28)T(-16)S(16)EGT(-24)FAGPK	2	0.7326
AT4G17330.3	760	S	19.5968	19.7898	19.8556	19.6116	19.921	19.7648	19.4259	19.5445	-0.0494	0.447743	0.191561	AT4G17330.3;AT4G17330.2;AT4G17330.1	760;795;795	679880	1727700	891020	730950	2527300	1392400	749920	585980	0.991597	20.7305	2.08186e-05	76.471	68.667	69.981	1	KPEDQNISGFMS(0.008)AGS(0.992)PVLNR	KPEDQNIS(-47)GFMS(-21)AGS(21)PVLNR	3	0.049091
AT4G17410.5	800	S	17.326	17.7031	17.8924	17.5181	17.8651	17.2172	17.317	17.5049	-0.13385	0.600165	0.125572	AT4G17410.5;AT4G17410.1;AT4G17410.3;AT4G17410.2	800;800;801;801	0	406730	228520	171270	607820	238160	173850	142520	0.866136	8.11431	0.000340104	59.261	41.772	59.261	1	RS(0.866)PS(0.134)VAPSDAGDEHFR	RS(8.1)PS(-8.1)VAPS(-37)DAGDEHFR	3	0.14579
AT5G47210.1	301	S	17.7235	22.1363	20.4746	21.0916	21.7444	22.3916	21.6753	21.5758	1.49027	0.0389721	1.06637	AT4G17520.1;AT5G47210.1	287;301	0	8786700	1368500	2039000	8944700	8600500	3565700	2395200	0.999954	43.3734	1.3559e-13	115.57	74.85	115.57	1	SLS(1)INEFLK	S(-43)LS(43)INEFLK	2	-0.32999
AT4G17620.3	119	S	19.1324	19.0617	19.7008	19.306	19.3522	19.4163	19.5665	19.3567	0.1227	0.110469	0.64861	AT4G17620.3;AT4G17620.2;AT4G17620.1	119;119;119	492760	1043000	800400	591450	1703900	1093600	826660	514430	0.999992	50.7797	1.1294e-09	102.62	85.678	102.62	1	DLFGS(1)DNEEYTK	DLFGS(51)DNEEY(-75)T(-51)K	2	0.22127
AT4G17620.3	530	S	21.1122	20.9092	16.3846	22.4952	11.5682	12.5123	20.483	15.5098	-5.20697	1.43403	0.0162885	AT4G17620.3;AT4G17620.2;AT4G17620.1	530;538;538	0	3753500	80354	0	0	0	1560400	0	0.989626	22.8057	7.29053e-06	53.408	45.666	53.408	1	LELLQAQS(0.005)CPDAIT(0.005)NHVHLLQNPAS(0.99)PPPPPQ	LELLQAQS(-23)CPDAIT(-23)NHVHLLQNPAS(23)PPPPPQ	3	0.15728
AT4G17720.1	260	S	21.5876	19.8488	19.3025	19.1388	20.3671	18.2513	18.6376	18.9115	-0.92755	0.905267	0.0576818	AT4G17720.1	260	2702300	1799800	607290	526700	3443200	487690	434220	377860	0.995903	23.8576	1.31249e-08	105.2	80.357	105.2	1	VHLS(0.004)ES(0.996)PK	VHLS(-24)ES(24)PK	2	0.45677
AT4G17770.2	5	S	18.2717	20.2087	19.2404	19.7173	21.8564	21.3612	21.7816	20.1783	1.93485	0.00309755	2.14829	AT4G17770.2;AT4G17770.1	5;5	271360	2309800	0	786550	9666900	4210500	3838300	909230	0.980113	16.9273	4.01977e-164	223.97	194.63	189.9	1	S(0.98)YS(0.02)NLLDLASGNFHSFSR	S(17)Y(-61)S(-17)NLLDLAS(-160)GNFHS(-180)FS(-180)R	2	0.28836
AT4G17890.1	402	S	17.8851	20.6825	18.2755	20.466	21.2895	21.8174	21.6942	21.0456	2.1344	0.00633412	1.83927	AT4G17890.1	402	207570	3207600	298010	1321600	6525700	5776400	3612700	1658600	0.999996	53.8141	1.18549e-108	208.47	157.62	208.47	1	LGTLAS(1)GIFSDIQDR	LGT(-54)LAS(54)GIFS(-100)DIQDR	2	0.29616
AT4G17890.1	318	S	19.5957	19.5201	20.3866	19.1642	19.5607	19.234	20.9611	21.1241	0.553325	0.0834355	0.757483	AT4G17890.1;AT4G17890.2	318;318	679370	1433100	0	0	1968800	963780	0	0	0.990087	20.0906	1.44368e-63	175.21	144.65	139.48	1	S(0.99)IS(0.01)SAQYFGDQNK	S(20)IS(-20)S(-37)AQY(-95)FGDQNK	2	-0.62899
AT4G18010.2	314	S	15.9453	15.527	16.8583	17.2978	19.9133	16.3994	19.1185	19.0862	2.22225	0.00943917	1.66756	AT4G18010.2;AT4G18010.1	314;314	54102	0	111590	147020	2513900	135110	606020	426500	0.999772	36.4268	5.29973e-07	100.19	86.281	100.19	1	S(1)FETLNLSWNDIK	S(36)FET(-36)LNLS(-74)WNDIK	2	0.62192
AT4G18010.2	283	S	17.2437	18.1332	18.8745	18.5292	15.6746	12.1566	14.6003	18.6532	-2.92398	1.39619	0.0178016	AT4G18010.2;AT4G18010.1	283;283	133070	547990	451410	345190	0	0	0	315910	0.897094	9.46834	7.9865e-05	69.01	64.398	69.01	1	VFS(0.897)S(0.101)NAT(0.002)LGFK	VFS(9.5)S(-9.5)NAT(-28)LGFK	2	0.41785
AT4G18905.1	44	S	17.3896	15.3108	18.6752	18.3612	18.9602	18.7518	18.9043	18.3663	1.31145	0.0314409	1.15592	AT4G18905.1;AT4G18905.2	44;44	147230	0	0	307240	1298500	689960	522390	258930	0.999994	52.4063	7.65811e-08	61.801	56.267	61.801	1	NVEGS(1)NEDEEEEIEEDGEEISEVDHAK	NVEGS(52)NEDEEEEIEEDGEEIS(-52)EVDHAK	3	-0.17164
AT4G18950.2	27	S	18.7654	19.3683	20.2374	20.6043	19.4288	19.9765	19.5848	19.5573	-0.107	0.39091	0.2266	AT4G18950.2;AT4G18950.1	27;27	382070	1290000	1161000	1454600	1796800	1612500	0	591190	0.83812	7.14112	1.02725e-06	73.672	66.197	56.247	1	IPEPS(0.838)VHS(0.162)EEEVFEDGEEIDGGVR	IPEPS(7.1)VHS(-7.1)EEEVFEDGEEIDGGVR	3	-4.2931
AT4G19150.2	169	S	17.7222	17.4645	17.2447	16.9998	17.1761	16.6116	16.6002	16.6302	-0.603275	1.85908	0.00604953	AT4G19150.2;AT4G19150.1	169;192	185400	344720	145860	119580	377030	156520	105780	77726	0.917781	10.478	0.00131009	63.709	49.551	57.679	1	TEIVKPES(0.082)CS(0.918)NEGDVK	T(-52)EIVKPES(-10)CS(10)NEGDVK	2	0.30204
AT4G19450.2	274	S	23.9124	19.5641	16.6647	21.644	17.8519	18.7703	17.9378	16.3203	-2.72622	1.14193	0.0325096	AT4G19450.2;AT4G19450.1	274;274	0	1477500	97575	0	602300	698840	267340	62705	1	46.3186	0.00106005	46.319	29.634	46.319	1	LEGS(1)GFILVDPDELELHK	LEGS(46)GFILVDPDELELHK	2	1.0582
AT4G20300.1	214	S	17.6806	17.5308	17.6507	17.4618	17.8604	17.0626	17.4794	17.7178	-0.050925	0.40399	0.217861	AT4G20300.1;AT4G20300.2	214;214	180130	360950	193260	164720	605840	213960	194560	165190	0.884945	8.86009	0.00106883	55.452	31.161	55.452	1	RS(0.115)PPS(0.885)PDQIEK	RS(-8.9)PPS(8.9)PDQIEK	2	-2.05
AT5G44460.1	23	S	20.5766	19.6508	19.7764	19.8566	19.3359	19.1739	19.389	20.0469	-0.478675	1.14807	0.0320357	AT5G44460.1;AT4G20780.1	23;24	1340900	1569000	843420	866290	1684700	924430	731000	0	0.999374	32.0305	0.000325831	82.749	46.805	57.59	1	S(0.001)PS(0.999)LNALR	S(-32)PS(32)LNALR	2	0.14319
AT4G20940.1	688	S	16.5248	16.7836	17.0717	17.1075	16.8483	16.1517	15.8205	17.8746	-0.198125	0.461865	0.183925	AT4G20940.1	688	80850	215030	0	0	300400	113790	0	0	0.995901	28.5311	0.00327153	42.789	37.63	42.789	1	GS(0.001)S(0.001)S(0.001)EILS(0.996)PDEK	GS(-29)S(-29)S(-29)EILS(29)PDEK	2	2.4019
AT4G20940.1	700	S	20.5306	20.5429	20.5989	20.2562	20.1985	20.5392	20.2038	20.2202	-0.191725	1.15189	0.031745	AT4G20940.1	700	1298800	2911900	1491600	1142700	3063400	2381700	1285800	935970	0.97993	17.2528	1.47983e-30	142.83	120.74	127.56	1	LAVAT(0.002)GFS(0.98)PS(0.018)K	LAVAT(-28)GFS(17)PS(-17)K	2	0.33337
AT4G20940.1	730	S	17.8019	16.4584	17.3703	17.7234	16.8048	15.6092	18.3207	18.9733	0.0885	0.26652	0.33852	AT4G20940.1	730	195930	171640	0	0	291470	78129	0	0	1	43.2819	0.02553	43.282	22.412	43.282	1	LDVRS(1)PDR	LDVRS(43)PDR	2	-0.81356
AT4G21160.4	153	S	22.7752	21.5775	22.5766	22.6159	21.1036	21.6859	22.4772	22.6841	-0.3986	0.682651	0.101087	AT4G21160.4;AT4G21160.3;AT4G21160.2;AT4G21160.1	153;153;153;153	6155000	0	0	5865000	0	0	6216300	5164000	0.790197	8.54193	4.36342e-79	190.46	129.94	169.23	1	TPAFLS(0.002)S(0.098)S(0.79)LS(0.111)K	T(-160)PAFLS(-27)S(-9.1)S(8.5)LS(-8.5)K	2	0.41834
AT4G21160.4	155	S	22.5411	22.5851	22.8077	23.0793	22.3794	22.6117	24.4983	24.1215	0.649425	0.0652254	0.855572	AT4G21160.4;AT4G21160.3;AT4G21160.2;AT4G21160.1	155;155;155;155	0	11993000	6895400	0	13890000	10018000	0	0	0.978468	17.4782	3.17509e-149	230.06	170.99	166.7	1	TPAFLS(0.001)S(0.003)S(0.017)LS(0.978)K	T(-160)PAFLS(-32)S(-25)S(-17)LS(17)K	2	0.55697
AT4G21450.1	294	S	13.4308	14.4132	14.2809	18.2375	17.4065	17.8847	17.9914	18.5827	2.87572	0.00869904	1.70265	AT4G21450.1;AT4G21450.3	294;313	0	0	0	282000	0	378280	277450	0	0.999974	45.8792	0.00142263	45.879	35.356	45.879	1	YLAQQQGEGADS(1)V	Y(-46)LAQQQGEGADS(46)V	2	0.27776
AT4G22140.2	210	S	17.9556	17.5684	17.2356	17.3666	17.7635	17.4349	17.0975	17.2573	-0.14325	0.580957	0.132207	AT4G22140.2;AT4G22140.3;AT4G22140.1	210;210;210	217970	370470	144940	154200	566480	276950	149310	120050	0.952814	16.1059	0.000312697	57.328	42.641	49.31	1	SQNGFT(0.023)S(0.023)S(0.953)PADDVK	S(-33)QNGFT(-16)S(-16)S(16)PADDVK	2	-0.81822
AT4G22290.1	150	S	19.6458	19.652	19.3439	19.0385	19.8698	19.8751	19.259	19.1141	0.10945	0.17857	0.472205	AT4G22290.1	150	703360	1570300	624960	491340	2439200	1503000	667970	434830	0.999999	62.0639	2.34452e-38	149.97	117.34	148.44	1	SGQLDHQLS(1)NLASSK	S(-85)GQLDHQLS(62)NLAS(-62)S(-79)K	2	-0.28057
AT4G22670.1	63	S	20.8069	21.3232	20.9112	20.831	20.9362	21.0872	21.5517	21.1363	0.209775	0.0666013	0.847177	AT4G22670.1	63	1572900	5001000	1852100	1702100	5108400	3482100	3272900	1766200	1	91.4383	1.20715e-150	234.57	218.04	234.38	1	SFVVEES(1)DDDMDETEEVKPK	S(-130)FVVEES(91)DDDMDET(-91)EEVKPK	2	-0.02185
AT4G22670.1	89	S	21.4072	22.0676	21.5548	22.4983	22.716	23.4831	25.0855	22.5404	1.57428	0.0103349	1.62863	AT4G22670.1	89	2384600	8378300	2893400	5406200	17540000	18327000	37906000	4674400	1	68.0507	1.13885e-45	146.25	139.17	143.75	1	VEEEEEEDEIVES(1)DVELEGDTVEPDNDPPQK	VEEEEEEDEIVES(68)DVELEGDT(-68)VEPDNDPPQK	3	-0.035025
AT4G22740.2	115	S	19.1366	18.7947	19.1237	19.1484	19.6106	19.8119	19.9702	20.0832	0.818125	0.000187656	3.36468	AT4G22740.2;AT4G22740.1	115;115	0	866760	536490	530210	2038100	1438600	1093600	851220	1	126.948	1.06962e-50	166.38	150.75	126.95	1	GPVIEEIDS(1)DDEK	GPVIEEIDS(130)DDEK	2	0.2866
AT4G22740.2	312	S	17.7859	15.7147	17.3073	18.9323	19.8114	19.0261	20.2846	21.2715	2.66335	0.00373707	2.06713	AT4G22740.2;AT4G22740.1	312;312	0	0	152330	456460	2342500	834420	0	0	0.99459	22.6447	6.47112e-11	105.13	92.042	105.13	1	S(0.005)GS(0.995)FGSGLVNR	S(-23)GS(23)FGS(-65)GLVNR	2	1.0445
AT4G23040.1	362	S	18.8943	18.6753	18.2981	17.9594	18.7638	18.2503	18.5674	18.1865	-0.014775	0.321382	0.281589	AT4G23040.1	362	417800	797930	302720	232560	1133200	487360	413610	228590	0.99557	24.4657	2.43795e-05	87.932	62.215	68.257	1	TQRPPS(0.996)PS(0.004)LT(0.001)AQR	T(-40)QRPPS(24)PS(-24)LT(-31)AQR	3	0.59407
AT4G23640.1	647	S	20.465	20.1995	19.3717	19.4417	20.3649	19.7945	19.2549	19.4991	-0.141125	0.449257	0.190724	AT4G23640.1	647	1241000	2295100	637130	649750	3437800	1421400	666100	567820	0.999954	43.4056	1.19941e-111	215.02	151.84	215.02	1	SIS(1)EANIAGSSR	S(-43)IS(43)EANIAGS(-170)S(-180)R	2	-0.013438
AT4G23800.2	32	S	15.1038	12.5433	13.3859	14.6292	17.0256	17.3236	17.4465	17.2756	3.35227	0.000278472	3.19305	AT4G23800.2;AT4G23800.1	32;32	30193	0	0	0	0	256390	190170	121580	0.874048	11.4236	0.000164518	69.716	49.412	56.783	1	NELVET(0.063)PPS(0.874)PVS(0.063)VK	NELVET(-11)PPS(11)PVS(-11)VK	2	0.052393
AT4G24100.1	499	S	18.6986	18.952	18.9033	18.832	18.9481	18.907	18.8707	18.5769	-0.0208	0.375056	0.237803	AT4G24100.1;AT4G24100.4;AT4G24100.2;AT4G24100.3	499;515;499;515	364800	966620	460490	425810	1287600	768310	510380	299630	0.962571	14.1536	0.000361508	62.94	50.775	40.962	1	RAPS(0.963)FS(0.037)GPLNLSTR	RAPS(14)FS(-14)GPLNLS(-36)T(-36)R	3	0.15259
AT4G24100.1	576	S	20.2559	18.6463	19.0081	19.372	14.9291	19.2394	20.3121	15.2606	-1.88527	0.938103	0.0532128	AT4G24100.1;AT4G24100.4	576;592	0	782050	495190	0	0	967420	0	30080	0.855108	7.70978	0.000581522	55.452	35.666	42.095	1	S(0.145)AS(0.855)VGNWILEPK	S(-7.7)AS(7.7)VGNWILEPK	2	0.47837
AT4G24275.1	44	S	18.3247	18.4371	18.7068	18.5176	17.0251	18.4541	18.642	19.1682	-0.1742	0.443149	0.194129	AT4G24275.1	44	281510	676460	401860	342420	0	561330	435540	0	0.938222	11.9822	0.000223647	64.675	50.468	64.675	1	S(0.938)VS(0.059)AS(0.002)AQAVPSPIK	S(12)VS(-12)AS(-26)AQAVPS(-58)PIK	2	-0.36464
AT4G24290.2	253	S	20.1878	19.0516	19.2645	18.9509	13.3097	13.4912	18.0647	13.0994	-4.87245	2.43461	0.00159941	AT4G24290.2;AT4G24290.3;AT4G24290.1	253;253;253	0	1035700	591490	462390	0	0	291910	0	0.981919	17.9889	0.00016939	71.241	61.883	71.241	1	FADTS(0.002)S(0.016)LGS(0.982)YANK	FADT(-35)S(-27)S(-18)LGS(18)Y(-45)ANK	2	0.50998
AT4G24290.2	504	S	11.2731	21.4621	12.9797	13.1791	22.2156	21.9345	21.1692	21.3578	6.94577	0.00510725	1.93215	AT4G24290.2;AT4G24290.3	504;504	0	5506300	0	0	12400000	6264700	2510800	0	0.994055	23.0991	5.38687e-06	83.54	73.201	56.407	1	S(0.994)GLIS(0.005)T(0.001)LISHHFTAAQK	S(23)GLIS(-23)T(-30)LIS(-42)HHFT(-53)AAQK	3	-0.0089782
AT4G24620.1	595	S	17.945	16.8736	16.9782	16.9347	17.6305	18.3717	17.0869	16.6175	0.243775	0.158476	0.514652	AT4G24620.1	595	216370	228880	121260	114310	516600	0	148220	77045	1	53.2519	0.000104584	72.089	47.746	53.252	1	VLIAEGNCGS(1)PR	VLIAEGNCGS(53)PR	2	0.61715
AT4G24680.5	224	S	17.5452	17.743	17.5814	17.9107	17.1315	17.029	17.0808	17.8483	-0.422675	1.34007	0.020316	AT4G24680.5;AT4G24680.3;AT4G24680.2;AT4G24680.1	224;224;225;239	164000	418140	184200	224840	365550	0	147590	0	0.999999	60.3502	1.31611e-05	86.378	71.112	77.562	1	S(1)VEGQGVDCTEEANDR	S(60)VEGQGVDCT(-60)EEANDR	2	-0.81017
AT4G24760.1	287	S	18.9878	18.6989	18.6719	18.2071	18.5954	18.5215	18.1601	18.267	-0.255425	0.9379	0.0532393	AT4G24760.1	287	445760	811070	392250	276130	1008400	588140	311870	241720	0.999914	40.6626	0.00513716	47.397	32.783	44.382	1	SMEGCEQPPRHS(1)VDAPR	S(-41)MEGCEQPPRHS(41)VDAPR	3	-0.26292
AT4G24800.4	98	S	20.2899	22.2795	22.6244	23.0732	22.76	23.6472	23.6831	23.2758	1.27477	0.0217651	1.31086	AT4G24800.4;AT4G24800.3;AT4G24800.2;AT4G24800.1	98;98;98;98	1099200	9703400	6072700	8052500	18084000	20534000	14340000	7782100	0.999319	31.681	8.86327e-52	141.25	132.64	136.03	1	LIDTDGDYHIDPNDPNY(0.001)DS(0.999)GEEPFELVGATLSDPLDDYK	LIDT(-56)DGDY(-72)HIDPNDPNY(-32)DS(32)GEEPFELVGAT(-83)LS(-95)DPLDDY(-120)K	3	-0.67197
AT4G25200.1	12	S	12.3375	13.6343	13.7573	13.1275	16.4394	17.084	17.1647	17.6295	3.86525	1.65035e-05	4.42362	AT4G25200.1	12	0	0	0	0	0	217150	156430	155380	0.775999	8.40641	0.000298288	62.823	24.737	62.823	1	LLS(0.776)S(0.112)S(0.112)IAPR	LLS(8.4)S(-8.4)S(-8.4)IAPR	2	0.092378
AT4G25340.2	209	S	21.6355	17.3139	19.776	21.5395	23.2918	23.8122	22.6205	21.7156	2.7938	0.00995122	1.64487	AT4G25340.2;AT4G25340.1	209;209	2793500	0	843230	2781300	26144000	23022000	6865800	2638900	1	50.2611	4.15445e-92	181.56	171.41	50.261	1	QIVAIEGAHVPVLES(1)EDEDEDGLPIPK	QIVAIEGAHVPVLES(50)EDEDEDGLPIPK	3	0.55169
AT4G25500.6	178	S	20.2881	17.8487	18.5881	18.6649	16.9301	17.539	17.7203	18.2391	-1.24033	1.41657	0.0169694	AT4G25500.6;AT4G25500.3;AT4G25500.8;AT4G25500.7;AT4G25500.5;AT4G25500.2;AT4G25500.4;AT4G25500.1	178;178;190;190;190;190;211;211	1097800	0	370130	0	0	297660	0	237090	0.999998	57.0709	0.000340111	59.908	38.444	59.908	1	GAS(1)PVAAYR	GAS(57)PVAAY(-57)R	2	0.17074
AT4G25500.6	265	S	21.7969	21.4925	20.9873	21.2516	21.1967	14.2168	15.7041	13.6552	-5.18888	1.91881	0.00526767	AT4G25500.6;AT4G25500.3;AT4G25500.8;AT4G25500.7;AT4G25500.5;AT4G25500.2;AT4G25500.4;AT4G25500.1	265;265;277;277;277;277;298;298	3124200	5623700	0	2278200	6119000	0	0	0	1	179.673	1.10731e-148	231.06	197.27	179.67	1	NGVGEVES(1)PIER	NGVGEVES(180)PIER	2	-0.37176
AT4G25730.1	509	S	17.3813	17.3522	17.1114	17.122	17.3722	16.8944	17.0328	17.2361	-0.10785	0.664366	0.10601	AT4G25730.1	509	146390	318910	132990	130150	431930	190410	142760	118300	0.995003	22.9914	0.0181541	45.077	28.94	45.077	1	IDY(0.005)DS(0.995)DMNEEK	IDY(-23)DS(23)DMNEEK	2	0.38185
AT4G25770.1	195	S	13.6119	13.2654	19.9283	13.0672	19.5411	19.9319	18.6287	19.6877	4.47915	0.00818271	1.72897	AT4G25770.1;AT4G25770.2	195;195	0	0	937080	0	1942300	0	0	647120	0.81662	7.49349	2.82861e-07	100.23	89.122	77.222	1	LYEQPGEVDS(0.038)LDS(0.817)PS(0.145)K	LY(-74)EQPGEVDS(-13)LDS(7.5)PS(-7.5)K	2	-0.2623
AT4G25880.2	83	S	12.8142	12.6755	17.031	13.2555	16.984	17.1467	17.7639	18.2359	3.58858	0.00342135	2.10532	AT4G25880.2;AT4G25880.3;AT4G25880.5;AT4G25880.1;AT4G25880.4	83;83;83;83;83	0	0	125780	0	330010	226790	236980	0	0.994257	23.7589	0.000623777	48.229	43.019	44.616	1	IPS(0.994)PPIY(0.004)Y(0.001)PTEYQFIDNR	IPS(24)PPIY(-24)Y(-30)PT(-35)EY(-39)QFIDNR	2	1.1742
AT4G25880.2	154	S	20.5726	18.6691	17.7914	18.4666	17.8737	15.2552	13.4965	13.957	-3.72933	2.05595	0.00383476	AT4G25880.2;AT4G25880.3;AT4G25880.5;AT4G25880.1;AT4G25880.4	154;154;154;154;154	0	794480	0	330540	611460	0	0	0	0.977083	16.3153	0.000318383	60.518	47.465	60.518	1	LS(0.977)PGS(0.023)QSLADFR	LS(16)PGS(-16)QS(-40)LADFR	2	1.9952
AT4G25880.2	30	S	19.7273	19.9109	16.9635	19.0385	20.7861	20.4996	20.86	18.5817	1.2718	0.0437139	1.01884	AT4G25880.2;AT4G25880.3;AT4G25880.5;AT4G25880.1;AT4G25880.4	30;30;30;30;30	0	1878900	120030	491320	4603600	2317200	2026400	300630	0.870651	8.28393	6.47372e-15	100.45	91.404	78.021	1	S(0.129)GS(0.871)APPNMEGSFLAVDNLLSR	S(-8.3)GS(8.3)APPNMEGS(-40)FLAVDNLLS(-70)R	2	-0.19633
AT5G57290.1	107	S	17.8595	23.1648	23.5504	24.0443	23.6652	24.0388	24.3457	23.6654	1.77403	0.0624109	0.873356	AT4G25890.1;AT5G57290.1;AT5G57290.3	106;107;106	203910	17924000	11538000	15786000	33868000	26938000	22699000	10195000	1	77.5617	0	306.4	293.44	77.562	1	KKEES(1)EEEEGDFGFDLFG	KKEES(78)EEEEGDFGFDLFG	2	-0.11151
AT4G25960.1	655	S	19.5358	19.0407	18.4278	18.2743	18.6977	18.5157	19.7933	18.1667	-0.0263	0.320655	0.282254	AT4G25960.1	655	651750	1027900	331200	289280	0	585800	0	225480	0.906761	9.8782	0.00328944	47.559	29.291	47.559	2	T(0.093)LS(0.907)RPHS(1)IK	T(-9.9)LS(9.9)RPHS(38)IK	2	0.57829
AT4G25960.1	659	S	19.5358	19.0407	18.4278	18.2743	18.2033	18.5157	17.8248	18.1667	-0.642025	1.32764	0.0209203	AT4G25960.1	659	651750	1027900	331200	289280	0	585800	0	225480	0.999841	37.5721	0.00328944	47.559	29.291	47.559	2	T(0.093)LS(0.907)RPHS(1)IK	T(-9.9)LS(9.9)RPHS(38)IK	2	0.57829
AT4G25970.1	35	S	18.8336	19.4857	20.2503	19.2015	18.9908	18.6646	15.1011	19.1962	-1.4546	0.996841	0.0461099	AT4G25970.1	35	400580	1399300	0	550100	1326300	649470	37421	460290	0.96293	19.1339	0.00161571	45.863	21.481	45.863	1	LS(0.012)RPGS(0.963)GS(0.012)VS(0.012)GLAS(0.002)QR	LS(-19)RPGS(19)GS(-19)VS(-19)GLAS(-27)QR	2	-0.54442
AT4G26130.1	64	S	21.6109	21.5464	21.2827	21.1377	21.5785	21.7501	21.0717	21.4159	0.059625	0.205791	0.423198	AT4G26130.1	64	2746300	5837700	2396000	2105300	7973200	5513200	2346700	2143900	1	82.1708	3.20675e-21	130.56	81.262	82.171	1	FGRPPS(1)LIDR	FGRPPS(82)LIDR	2	0.26228
AT4G26130.1	107	S	21.2225	20.748	20.7834	20.9043	20.4271	21.0381	20.7574	20.9768	-0.1147	0.570879	0.13585	AT4G26130.1	107	2098000	3356600	1695100	1790800	3589300	3365700	1887300	1581400	1	83.6226	0.000124031	94.692	71.372	94.692	1	S(1)INMPYFK	S(84)INMPY(-84)FK	2	-0.25559
AT4G26130.1	244	S	19.5639	18.3452	19.2344	19.2972	19.246	16.3339	17.8736	19.0027	-0.996125	0.972365	0.0489395	AT4G26130.1	244	664560	0	0	587820	1583000	0	0	402510	0.999972	48.5848	2.78588e-29	146	125.58	146	1	TTS(1)IGDGGEEGVDDK	T(-49)T(-49)S(49)IGDGGEEGVDDK	2	-0.29252
AT4G26160.1	204	S	18.849	17.8074	17.7586	17.1321	18.0329	19.1267	17.7055	17.5183	0.209075	0.185006	0.459823	AT4G26160.1	204	0	437220	208270	131070	682800	0	0	143850	0.962596	16.5146	0.000188411	62.378	47.177	62.378	1	HNVGS(0.963)IS(0.021)NIS(0.004)S(0.004)S(0.004)AS(0.003)EK	HNVGS(17)IS(-17)NIS(-23)S(-23)S(-23)AS(-26)EK	2	-0.017047
AT4G26630.2	747	S	19.0461	17.6259	18.0931	17.5966	19.1403	17.636	17.7335	17.7217	-0.03255	0.323454	0.279708	AT4G26630.2;AT4G26630.1	747;747	464160	385540	262620	180850	1471100	318360	232030	165640	1	121.26	9.66144e-17	121.26	113.23	121.26	1	LADEEEEEEKKEEDS(1)EK	LADEEEEEEKKEEDS(120)EK	3	-0.042199
AT4G26630.2	523	S	18.7043	17.5289	18.5566	18.6246	18.589	17.5387	18.5174	18.5266	-0.060675	0.358327	0.250419	AT4G26630.2;AT4G26630.1	523;523	0	0	362130	368780	1003900	297600	399500	289360	0.834212	7.01768	0.000373597	60.602	44.096	60.602	1	SLAHS(0.166)DDES(0.834)EEEKEEEEK	S(-47)LAHS(-7)DDES(7)EEEKEEEEK	3	0.98865
AT4G27060.1	579	S	19.9176	19.1532	18.7524	18.5924	18.8173	10.0882	13.7526	12.4483	-5.3273	1.83787	0.00635439	AT4G27060.1	579	849160	1111300	414760	0	1176000	0	0	0	0.99946	33.2147	7.02581e-06	80.69	57.464	76.522	1	YNS(0.999)FANYPTGK	Y(-33)NS(33)FANY(-44)PT(-46)GK	2	1.6156
AT4G27430.2	477	S	20.7547	20.9564	20.9008	20.5911	20.861	20.7934	20.7518	20.5979	-0.049725	0.499353	0.165388	AT4G27430.2;AT4G27430.1	477;477	1517000	3878400	1838800	1441300	4848800	2840600	1879900	1216100	1	69.4507	2.15214e-78	182.35	163.57	69.451	1	DNDS(1)EPEELLR	DNDS(69)EPEELLR	2	0.17432
AT4G27430.2	915	S	21.2829	19.0726	19.042	18.1537	19.2677	19.9251	19.1883	17.8241	-0.3365	0.463144	0.183252	AT4G27430.2;AT4G27430.1	915;915	0	1050900	506980	266080	1607000	1556000	636050	177820	1	42.3359	1.94557e-20	128.96	109.22	42.336	1	QVDALPAVAS(1)VDDFK	QVDALPAVAS(42)VDDFK	2	-1.1514
AT4G27430.2	887	S	18.1763	18.6334	18.6143	18.6263	18.6004	18.5475	18.1013	18.0329	-0.19205	0.769899	0.0808508	AT4G27430.2;AT4G27430.1	887;887	253990	775090	376910	369220	1011900	598840	299410	205510	0.993956	22.2862	0.000367386	82.362	35.77	51.013	1	SVELS(0.006)RDPS(0.994)LEIK	S(-38)VELS(-22)RDPS(22)LEIK	2	0.2927
AT4G27450.1	244	S	21.7589	20.8995	21.0302	21.1871	21.0959	20.8078	20.9765	20.8723	-0.2808	0.980813	0.0479427	AT4G27450.1	244	3042900	3728300	2011400	2178500	5706100	2869000	2196800	1470900	0.999999	58.495	0.000312172	79.23	66.994	72.652	1	RGS(1)EANWSL	RGS(58)EANWS(-58)L	2	-0.048347
AT4G27450.1	219	S	22.5186	22.3554	22.4566	22.417	22.453	22.3112	22.3481	22.2687	-0.09165	1.18798	0.0291262	AT4G27450.1	219	5152100	10228000	5406000	5109900	14617000	8134100	5684500	3872000	1	146.503	1.86263e-194	257.95	240.36	146.5	1	VDS(1)EGVLCGANFK	VDS(150)EGVLCGANFK	2	-0.49407
AT4G27500.1	540	S	21.7562	22.2291	22.1484	21.6451	22.1682	22.2144	22.03	21.6271	0.065225	0.204374	0.425545	AT4G27500.1	540	3037200	9370200	4366100	2992500	11999000	7606000	4559500	2481900	1	64.471	5.47531e-41	143.37	133.09	143.37	1	TGGNTETETEEVPEAS(1)EEEIEAPVQEEK	T(-89)GGNT(-86)ET(-76)ET(-64)EEVPEAS(64)EEEIEAPVQEEK	3	-0.04777
AT4G27870.1	254	S	20.6182	20.8966	19.2713	20.4989	21.4297	21.2671	21.1962	20.9326	0.88515	0.0123221	1.55324	AT4G27870.1;AT4G27870.2	254;274	0	3720800	0	1352100	7191600	3944500	2558100	1533700	0.902536	12.7218	1.88566e-07	61.28	50.764	53.266	1	RPHLT(0.048)EPLFHS(0.903)EDNLPS(0.048)LDGGENS(0.001)ANESFVFK	RPHLT(-13)EPLFHS(13)EDNLPS(-13)LDGGENS(-30)ANES(-43)FVFK	4	2.513
AT4G27900.2	183	S	22.1599	21.433	18.9922	21.5242	21.6027	18.1255	20.8	22.0422	-0.384725	0.429965	0.20174	AT4G27900.2;AT4G27900.1	183;183	0	5396400	489770	0	8107800	0	1943800	0	0.973904	15.7196	2.22408e-28	131.18	113.78	131.18	1	AFS(0.974)ES(0.026)DIQTLGTGNTGLVQSQLDR	AFS(16)ES(-16)DIQT(-59)LGT(-87)GNT(-96)GLVQS(-120)QLDR	2	0.36467
AT4G27900.2	148	S	17.978	16.0423	16.8394	17.3508	12.4767	14.0896	12.5836	17.7675	-2.82327	1.43678	0.0161834	AT4G27900.2;AT4G27900.1	148;148	221370	0	0	152520	0	0	0	170980	0.764005	7.80888	0.000345992	52.265	44.885	52.265	1	S(0.109)VS(0.764)S(0.127)GNLSSMDMVEHK	S(-8.5)VS(7.8)S(-7.8)GNLS(-35)S(-38)MDMVEHK	2	-0.50921
AT4G28080.1	165	S	17.2608	16.0334	17.0858	17.194	17.2074	12.0795	15.0923	12.8925	-2.57558	1.43395	0.0162912	AT4G28080.1	165	134660	127840	0	0	385300	0	0	0	0.999972	45.499	1.10844e-62	177.58	155.95	177.58	1	DAGDSNSGLS(1)PKPK	DAGDS(-85)NS(-45)GLS(45)PKPK	2	-0.20052
AT4G28080.1	1244	S	17.1485	16.7844	18.008	17.4844	17.8314	17.1689	17.5076	17.0351	0.029425	0.271132	0.33314	AT4G28080.1	1244	124570	0	247580	167320	593800	230320	198400	102910	0.999942	42.373	7.10882e-09	92.01	87.982	92.01	1	PEATVHEDDDS(1)DEGWQEAVPK	PEAT(-42)VHEDDDS(42)DEGWQEAVPK	3	0.18344
AT4G28080.1	1360	S	20.8504	21.2313	21.7248	21.0288	20.6728	20.7552	20.8237	20.8704	-0.4283	1.46275	0.0152275	AT4G28080.1	1360	1621100	4692500	3255200	1952200	4255800	2766400	1976000	1468900	0.992788	22.3378	0.000185723	77.593	43.718	46.592	1	PT(0.001)PMLS(0.993)PVS(0.006)VK	PT(-28)PMLS(22)PVS(-22)VK	2	2.3498
AT4G28080.1	1293	S	17.9367	16.6212	17.6669	17.6693	17.2654	14.3096	20.3426	18.8329	0.2141	0.250513	0.358207	AT4G28080.1	1293	215120	192140	0	0	401090	31738	0	0	0.996416	24.4403	1.31249e-08	105.2	76.499	105.2	1	STNFT(0.004)S(0.996)PR	S(-96)T(-96)NFT(-24)S(24)PR	2	-0.21716
AT4G28080.1	1542	S	12.901	21.6442	13.9039	14.4543	21.5686	20.7537	20.3318	20.633	5.09592	0.00984547	1.64945	AT4G28080.1	1542	0	6247100	0	0	7918600	2763400	0	1246100	0.931869	11.3601	0	341.69	309.62	304.24	1	TVDGETENLPNGDS(0.932)S(0.068)PK	T(-270)VDGET(-150)ENLPNGDS(11)S(-11)PK	2	0.074977
AT4G28080.1	1543	S	21.695	20.2095	21.0449	20.7887	14.4424	14.5788	20.8093	14.0864	-4.9553	1.93017	0.00513054	AT4G28080.1	1543	2911100	0	2032000	1652900	0	0	1956400	0	0.904669	9.77256	0	330.85	298.78	265.73	1	TVDGETENLPNGDS(0.095)S(0.905)PK	T(-240)VDGET(-160)ENLPNGDS(-9.8)S(9.8)PK	2	0.13537
AT4G28080.1	1453	S	23.5819	23.0492	22.7719	22.6173	23.5786	23.022	23.1121	22.7896	0.1205	0.17716	0.474991	AT4G28080.1	1453	10766000	16544000	6726600	5871000	31895000	13313000	9652900	5555700	0.98301	17.6992	5.40708e-109	204.35	165.71	173.68	1	VVVGGSELTS(0.017)S(0.983)PK	VVVGGS(-78)ELT(-35)S(-18)S(18)PK	2	0.50276
AT4G28610.1	291	S	20.2979	19.3098	19.3201	19.2849	19.6706	18.8989	19.3595	19.4652	-0.204625	0.587692	0.129836	AT4G28610.1	291	1105300	1238700	614740	582840	2124700	764000	716170	554610	0.962097	14.0466	0.000703744	78.501	71.772	78.501	1	YRPEPSET(0.038)GS(0.962)PERK	Y(-76)RPEPS(-50)ET(-14)GS(14)PERK	3	-0.1616
AT4G28980.3	208	S	17.3522	16.548	17.7593	17.8322	15.9885	16.8415	17.7133	17.8946	-0.26345	0.497653	0.166178	AT4G28980.3;AT4G28980.2;AT4G28980.1	208;208;208	143460	0	0	212930	0	0	228810	186730	0.965986	14.9015	0.000845991	50.608	38.816	41.871	1	DGET(0.002)S(0.001)EPPEVIPDY(0.031)ENS(0.966)PR	DGET(-26)S(-32)EPPEVIPDY(-15)ENS(15)PR	2	-0.49281
AT4G28980.3	443	S	18.981	20.8478	19.5143	22.321	20.5424	22.0163	20.9511	23.2519	1.2744	0.0538726	0.933074	AT4G28980.3;AT4G28980.2;AT4G28980.1	443;443;443	443680	3597200	0	0	0	6630400	2158400	0	0.909103	14.598	1.4796e-10	71.903	61.098	49.814	1	YLSEEPLPVPVS(0.015)ELY(0.013)VPPT(0.032)MS(0.032)GPDEDS(0.909)PRK	Y(-45)LS(-40)EEPLPVPVS(-18)ELY(-18)VPPT(-15)MS(-15)GPDEDS(15)PRK	3	0.089234
AT4G28990.1	114	S	18.0558	16.9054	17.9308	17.9666	11.8822	13.6182	14.4345	14.3279	-4.14895	3.46241	0.000149857	AT4G28990.1;AT4G28990.2	114;162	0	0	234680	233720	0	0	0	0	0.968655	14.9001	0.00196695	45.915	33.77	41.502	1	DY(0.031)S(0.969)PPLAR	DY(-15)S(15)PPLAR	2	0.23287
AT4G28990.1	203	S	19.1913	19.0136	18.9587	18.7651	18.7422	18.5344	18.5771	18.2981	-0.444225	2.19344	0.00279104	AT4G28990.1;AT4G28990.2	203;251	513280	1008800	478540	406510	1116400	593440	416390	0	1	40.5891	0.00554448	54.471	45.183	40.589	1	LLPPPMNHS(1)PR	LLPPPMNHS(41)PR	2	-0.77579
AT4G28990.1	189	S	20.729	20.7401	20.1862	20.1742	20.3583	19.9783	19.9535	19.7691	-0.442575	1.44817	0.0157568	AT4G28990.1;AT4G28990.2	189;237	1490200	3338400	1120500	1079600	3422300	1614500	1081000	684680	1	68.3957	5.2897e-11	106.67	84.431	96.604	1	YAPANS(1)PPLPR	Y(-68)APANS(68)PPLPR	2	0.30357
AT4G29190.1	271	S	19.5915	18.4811	19.241	18.6184	18.1776	18.4366	18.727	19.8918	-0.17475	0.445506	0.192806	AT4G29190.1	271	0	697440	581930	367220	754820	554540	461970	0	1	56.2251	7.61224e-06	79.82	72.996	56.225	1	NNPLFGFGS(1)PR	NNPLFGFGS(56)PR	2	-0.29967
AT4G29220.1	71	S	14.8733	18.2624	13.4795	13.9701	18.7485	17.7173	19.1454	20.3123	3.83455	0.00413719	2.02316	AT4G29220.1	71	0	599310	0	0	1121300	336820	0	0	1	54.4164	1.92677e-05	90.108	76.383	54.416	1	IVVHPDS(1)PR	IVVHPDS(54)PR	2	-0.846
AT4G29440.2	855	S	17.7975	17.2707	16.8162	16.9653	17.918	17.3345	16.1985	17.4616	0.015725	0.288899	0.313509	AT4G29440.2;AT4G29440.1	855;883	195340	301390	108380	116760	630540	258330	0	138310	1	63.2534	9.79384e-06	77.062	64.054	77.062	1	VSFDEES(1)PPK	VS(-63)FDEES(63)PPK	2	0.41621
AT4G29810.1	56	S	23.4354	25.1378	24.387	26.0851	25.4893	25.9878	25.8095	26.7291	1.2426	0.0204789	1.33668	AT4G29810.1;AT4G29810.3;AT4G29810.2	56;65;65	9726400	70367000	20606000	0	119920000	104010000	62613000	85242000	1	174.586	1.20969e-193	254.56	215.76	254.56	1	IISQLEPEVLS(1)PIK	IIS(-170)QLEPEVLS(170)PIK	2	0.22939
AT4G29860.1	206	S	18.0714	18.02	18.4926	18.2061	18.4781	18.2166	18.1454	17.999	0.01225	0.273999	0.329855	AT4G29860.1	206	236180	506630	346410	275940	929600	476120	308710	200740	0.959209	17.0876	1.11298e-06	88.73	76.516	77.562	1	IIQLPQSS(0.003)PDES(0.959)PNAS(0.019)T(0.019)K	IIQLPQS(-33)S(-25)PDES(17)PNAS(-17)T(-17)K	2	0.051506
AT4G29900.2	8	S	17.1413	16.3849	16.665	17.2796	16.6192	14.9209	11.0544	15.087	-2.44732	1.35548	0.0195912	AT4G29900.2;AT4G29900.1	8;8	123950	163110	0	0	256290	0	0	0	0.999999	61.7311	1.85338e-05	87.18	66.227	87.18	1	SGQFNNS(1)PRGEDK	S(-62)GQFNNS(62)PRGEDK	2	-0.14527
AT4G30160.4	787	S	19.8396	20.5811	20.8648	20.0261	21.1756	21.6917	20.9645	21.1671	0.921825	0.00385448	2.05372	AT4G30160.4;AT4G30160.3;AT4G30160.1;AT4G30160.2	787;787;787;796	804480	2990000	1793500	974280	6030100	5294300	2178600	1804300	1	100.441	4.01488e-23	134.66	123.28	134.66	1	GRS(1)PAFNALAATFESQNAR	GRS(100)PAFNALAAT(-100)FES(-120)QNAR	3	0.12703
AT4G30160.4	806	S	20.3164	19.6875	19.1985	19.2249	19.9615	19.6905	19.7207	19.4614	0.1017	0.197221	0.437717	AT4G30160.4;AT4G30160.3;AT4G30160.1;AT4G30160.2	806;806;806;815	1119600	1609400	565070	559090	2599300	1322500	919910	553150	0.999823	37.5181	6.36875e-16	121.6	106.01	85.958	1	NLS(1)TPPPVVR	NLS(38)T(-38)PPPVVR	2	0.44432
AT4G30160.4	777	S	17.9951	16.836	17.2467	17.1059	17.3194	16.9273	17.7401	17.6788	0.120475	0.191068	0.448633	AT4G30160.4;AT4G30160.3;AT4G30160.1;AT4G30160.2	777;777;777;786	224010	222980	146060	128710	416400	194800	233100	160780	0.999966	44.6621	1.56422e-21	126.71	109.77	110.38	1	SMSFS(1)PDRVR	S(-68)MS(-45)FS(45)PDRVR	2	-1.4823
AT4G30780.1	558	S	16.8837	15.3897	15.7998	15.4887	18.5608	19.3407	18.6457	19.4607	3.1115	6.21086e-05	3.84462	AT4G30780.1	558	103680	0	53576	41956	984470	1037800	436670	0	0.977308	16.3415	3.77283e-07	98.353	76.156	68.069	1	DS(0.977)FS(0.023)DLLLHLPR	DS(16)FS(-16)DLLLHLPR	2	0.57841
AT4G30780.1	81	S	16.8119	18.9934	15.8682	18.2194	20.0271	19.7588	19.3103	18.736	1.98483	0.00857411	1.70888	AT4G30780.1	81	98646	994730	0	278480	2720300	1386600	692180	334560	0.992131	21.0064	0.000679326	69.01	57.163	69.01	1	S(0.008)PS(0.992)LLELIQMK	S(-21)PS(21)LLELIQMK	2	-0.48205
AT4G30780.1	495	S	18.7023	18.3754	16.5588	17.7403	18.0498	17.6657	18.4741	18.3308	0.2859	0.152401	0.528771	AT4G30780.1	495	0	648150	90667	199790	690860	0	387700	252650	0.999997	55.8029	2.42367e-05	72.006	59.78	72.006	1	VNS(1)LFNLLYK	VNS(56)LFNLLY(-56)K	2	-0.23472
AT4G30890.3	143	S	17.3128	16.1252	17.6833	17.634	14.0292	11.4509	12.9195	18.1469	-3.0522	1.37051	0.0189102	AT4G30890.3;AT4G30890.2;AT4G30890.1	143;143;143	139600	0	0	185600	0	0	0	222410	0.848426	8.13254	4.62355e-06	89.846	75.076	70.335	1	TDPIGLDNLS(0.13)MS(0.848)DGES(0.021)DPVYK	T(-41)DPIGLDNLS(-8.1)MS(8.1)DGES(-16)DPVY(-52)K	2	-1.1579
AT4G30890.3	360	S	13.9397	19.6442	13.7135	11.7103	18.4382	19.0503	20.2117	18.0426	4.18378	0.0123422	1.55255	AT4G30890.3;AT4G30890.2;AT4G30890.1	360;360;360	0	1561800	0	0	904240	848540	0	206890	0.914245	10.3028	0.000208273	63.631	52.111	63.631	1	T(0.085)QS(0.914)FVPSELSEIFGGQLK	T(-10)QS(10)FVPS(-33)ELS(-43)EIFGGQLK	2	0.027995
AT4G31160.1	1243	S	20.2619	19.3063	20.3997	18.7175	18.9584	18.8219	20.407	20.529	0.007725	0.296817	0.305284	AT4G31160.1	1243	0	1235700	0	393330	1296900	724310	0	0	0.994616	25.2914	2.87089e-15	124.3	104.52	124.3	1	QLTFS(0.003)PS(0.995)FS(0.002)SQSR	QLT(-74)FS(-25)PS(25)FS(-28)S(-36)QS(-34)R	2	-0.23059
AT4G31160.1	349	S	17.7664	18.4025	18.6394	18.3611	18.4637	18.4317	18.4186	18.5862	0.1827	0.0895031	0.729929	AT4G31160.1	349	191170	660450	383520	307230	920420	552660	373070	301580	0.999996	53.6694	1.76874e-09	103.21	92.108	70.335	1	VHEGAPDTEVLLAS(1)PR	VHEGAPDT(-54)EVLLAS(54)PR	3	0.32646
AT4G31580.2	160	S	18.4696	15.6748	14.3772	18.8184	16.5468	14.3594	18.5699	15.2824	-0.645375	0.47891	0.175199	AT4G31580.2;AT4G31580.1	160;160	311260	0	19986	0	243740	32854	0	30538	1	48.6592	0.00712166	48.659	44.896	48.659	2	RRS(1)PS(1)PPPAR	RRS(49)PS(49)PPPAR	3	0.087915
AT4G31580.2	162	S	18.4696	19.2033	14.3772	21.9066	16.5468	14.3594	14.9654	15.2824	-3.20067	1.31769	0.0214169	AT4G31580.2;AT4G31580.1	162;162	311260	0	19986	0	243740	32854	0	30538	1	48.6592	0.00712166	48.659	44.896	48.659	2	RRS(1)PS(1)PPPAR	RRS(49)PS(49)PPPAR	3	0.087915
AT4G31590.1	614	S	16.2433	20.4683	16.7468	15.0077	20.5831	21.4759	19.8484	17.4586	2.72497	0.0247236	1.25698	AT4G31590.1	614	66518	2765100	103290	30059	3999100	0	1005100	138020	0.990203	20.0465	7.69236e-51	164.65	147.57	101.36	1	GVS(0.99)DS(0.01)ELLELSQLEEQK	GVS(20)DS(-20)ELLELS(-80)QLEEQK	2	-1.6982
AT4G31800.3	89	S	12.6371	12.8437	18.0716	11.7058	16.1483	17.4466	17.1187	17.6273	3.27068	0.0152072	1.46332	AT4G31800.3;AT4G31800.2;AT4G31800.1	89;24;89	0	0	258740	0	0	279200	151520	155140	0.998852	29.3964	0.00129628	47.261	36.737	47.261	1	QS(0.999)PEIEQT(0.001)DIPIK	QS(29)PEIEQT(-29)DIPIK	2	0.67628
AT4G31880.1	666	S	19.7293	18.0592	18.9526	18.7703	22.9325	13.7945	13.3748	13.3773	-3.00808	0.897292	0.0588266	AT4G31880.1;AT4G31880.2	666;665	745290	0	476520	407970	20381000	0	0	0	0.81627	8.6606	1.21533e-11	75.14	68.487	75.14	1	WS(0.039)PLDES(0.034)ELS(0.816)QDEEAADQT(0.111)GQEEDASTVPLTK	WS(-13)PLDES(-14)ELS(8.7)QDEEAADQT(-8.7)GQEEDAS(-53)T(-57)VPLT(-70)K	3	-1.2376
AT4G32140.1	87	S	13.1922	19.8242	19.0662	17.1628	14.869	13.5581	18.2337	15.4211	-1.79088	0.752936	0.084405	AT4G32140.1	87	0	1769300	0	133890	0	0	328190	0	0.998485	28.6672	9.34667e-30	145.1	112.36	145.1	1	IPALTDDSS(0.001)VELGS(0.998)PLR	IPALT(-91)DDS(-38)S(-29)VELGS(29)PLR	2	-0.29157
AT4G32180.3	286	S	17.7291	19.8114	18.5406	19.2337	20.2817	20.5187	14.6157	19.5128	-0.096475	0.32356	0.279612	AT4G32180.3;AT4G32180.2;AT4G32180.1	286;286;286	186290	1753700	358130	562510	3245200	2348000	26729	573220	1	91.4904	5.33394e-08	96.103	75.774	96.103	1	S(1)FDELLELSQK	S(91)FDELLELS(-91)QK	2	0.033597
AT4G32180.3	46	S	20.4549	18.7853	18.2774	18.27	17.9983	17.9288	18.5297	18.7697	-0.640275	0.833759	0.0688657	AT4G32180.3;AT4G32180.2;AT4G32180.1	46;46;46	1232400	861160	298400	288420	666620	390000	402940	342480	0.997893	26.7582	9.58815e-15	116.24	83.009	75.462	1	S(0.002)GS(0.998)RPQLDLSK	S(-27)GS(27)RPQLDLS(-56)K	3	-0.10128
AT4G32285.2	207	S	23.4521	23.5792	23.6638	23.173	23.3264	23.3754	23.1808	23.1648	-0.205175	1.16611	0.0306852	AT4G32285.2;AT4G32285.1	207;207	9840300	23888000	12482000	8629600	26779000	17008000	10124000	7206000	1	188.27	2.89403e-171	241.39	206.58	188.27	1	S(1)FGDVNEIGAR	S(190)FGDVNEIGAR	2	-0.10963
AT4G32285.2	185	S	19.0111	18.0591	17.8293	17.7157	16.1588	17.4496	17.7595	17.7276	-0.879925	1.23627	0.025968	AT4G32285.2;AT4G32285.1	185;185	453030	520540	218730	196410	0	279790	236260	166310	0.966117	14.5505	0.0433714	41.092	33.721	41.092	1	S(0.034)RDDFRS(0.966)PPPR	S(-15)RDDFRS(15)PPPR	3	0.074808
AT4G32330.2	414	S	20.7302	19.8565	20.3982	20.1331	19.6088	19.5383	20.985	21.7101	0.18105	0.207417	0.420529	AT4G32330.2;AT4G32330.4;AT4G32330.3;AT4G32330.1	414;415;415;415	0	1809400	0	1049300	2035600	1190100	0	0	0.958479	14.019	4.26033e-42	132.43	120.19	101.26	1	DAETVNQTSHPTEEEAQVTVSSNADVEDS(0.003)HET(0.038)VS(0.958)PR	DAET(-91)VNQT(-84)S(-84)HPT(-85)EEEAQVT(-52)VS(-41)S(-41)NADVEDS(-25)HET(-14)VS(14)PR	4	-0.74816
AT4G33050.6	45	S	21.1289	20.2452	20.6371	20.1048	20.0966	20.737	20.9909	20.2175	-0.0185	0.32114	0.28181	AT4G33050.6;AT4G33050.4;AT4G33050.1;AT4G33050.3;AT4G33050.2;AT4G33050.5	45;45;45;45;45;117	0	2368900	1531600	1028900	2854500	2731700	2218900	934230	0.999811	37.9917	6.37449e-52	162.31	122.15	123.84	1	SLS(1)FNSWEVPK	S(-38)LS(38)FNS(-45)WEVPK	2	0.17083
AT4G33400.1	58	S	20.2593	20.0185	19.8137	19.4788	19.9325	19.4184	19.2217	21.4751	0.11935	0.23332	0.381282	AT4G33400.1	58	1076100	2024400	865520	666690	2547500	1095200	650920	0	0.988162	19.2912	1.13817e-92	195.77	174.9	81.431	1	S(0.988)PS(0.012)SSLDDVEAK	S(19)PS(-19)S(-37)S(-46)LDDVEAK	2	-0.75904
AT4G33530.1	766	S	17.9127	20.3489	17.7321	19.2147	21.6844	21.6529	20.1562	19.6676	1.98817	0.0104892	1.62227	AT4G33530.1;AT4G33530.2	766;538	211580	2545400	204490	555180	8580100	5154000	1244100	638150	0.999999	60.3966	9.38942e-09	93.269	84.173	92.31	1	AS(1)IDFGAGPSSALDVEQSLEK	AS(60)IDFGAGPS(-60)S(-65)ALDVEQS(-89)LEK	2	-0.21189
AT4G33530.1	81	S	16.968	19.6919	20.4613	17.6611	18.2079	21.7726	19.5588	19.4752	1.05805	0.0906291	0.725044	AT4G33530.1	81	109920	1614300	0	189120	0	5600000	0	558490	0.970388	18.1897	0.000401626	59.898	47.131	51.875	1	T(0.015)S(0.015)PAVDS(0.97)FDVDALEIPGTQK	T(-18)S(-18)PAVDS(18)FDVDALEIPGT(-38)QK	2	-0.50691
AT4G34860.3	83	S	18.3022	18.3971	18.4184	18.4004	18.6444	18.9443	18.6204	18.7277	0.354675	0.000861626	2.70292	AT4G34860.3;AT4G34860.2;AT4G34860.1	83;83;83	277160	658000	329050	315720	1043200	788470	429070	332640	0.986951	18.7899	2.0063e-06	93.478	84.156	91.207	1	APDHADYVIS(0.987)PS(0.013)FGR	APDHADY(-51)VIS(19)PS(-19)FGR	2	0.46858
AT4G34860.3	85	S	18.1289	18.1424	18.6118	18.4105	17.0033	17.5868	17.409	17.6878	-0.901675	2.79614	0.000694993	AT4G34860.3;AT4G34860.2;AT4G34860.1	85;85;85	245790	551490	376260	317940	0	307690	185300	161790	0.867252	8.152	0.000678595	50.843	38.867	48.704	1	APDHADYVIS(0.133)PS(0.867)FGR	APDHADY(-45)VIS(-8.2)PS(8.2)FGR	2	0.60481
AT4G34860.3	50	S	19.876	18.5285	18.2612	18.8093	16.6286	17.189	18.1007	17.9657	-1.39775	1.82282	0.00658008	AT4G34860.3;AT4G34860.2;AT4G34860.1	50;50;50	825040	720730	295070	0	0	233540	299280	196160	1	99.815	2.49536e-05	99.815	20.667	99.815	1	LRS(1)LDER	LRS(100)LDER	2	-0.22273
AT4G34860.3	62	S	19.6536	19.8224	19.8885	19.8445	19.7078	20.1071	20.0706	19.954	0.157625	0.0408417	1.04694	AT4G34860.3;AT4G34860.2;AT4G34860.1	62;62;62	707170	1767100	911580	859020	2180200	1765200	1172400	778290	0.999569	33.6556	2.74518e-39	153.38	122.83	152.14	1	SLTELTGS(1)PQLR	S(-130)LT(-100)ELT(-34)GS(34)PQLR	2	0.22764
AT4G35100.2	273	S	23.2871	21.9971	21.4218	22.2901	20.3815	20.917	20.0329	20.0009	-1.91595	2.59913	0.0010945	AT4G35100.2;AT4G35100.1	273;273	8776300	7978800	2638600	0	0	3094600	0	804000	0.999502	32.9686	2.6863e-05	85.924	45.572	62.232	1;2	ALGS(1)FRS(0.987)NAT(0.013)N	ALGS(33)FRS(19)NAT(-19)N	2	0.38519
AT4G35100.2	276	S	22.8007	22.5895	21.4218	19.9515	20.6897	20.917	20.1667	20.7287	-1.06535	1.08381	0.0373703	AT4G35100.2;AT4G35100.1	276;276	6264700	12030000	2638600	925180	0	3094600	0	1331500	0.996952	25.1402	7.50161e-06	89.663	58.241	46.796	1;2	ALGS(0.998)FRS(0.997)NAT(0.005)N	ALGS(28)FRS(25)NAT(-25)N	2	0.40467
AT4G35110.6	173	S	16.2588	18.7764	17.8114	18.6847	18.7949	19.4238	18.6561	19.2315	1.14375	0.0246174	1.25879	AT4G35110.6;AT4G35110.5;AT4G35110.2;AT4G35110.1;AT4G35110.4;AT4G35110.3	173;173;173;173;185;188	67236	855860	216040	0	1157900	0	0	471680	0.995296	23.2546	0.000902989	51.268	23.939	51.268	1	LFS(0.005)FLS(0.995)LPR	LFS(-23)FLS(23)LPR	2	-0.27824
AT4G35240.4	73	S	19.0312	19.1176	19.0614	19.2391	19.0027	18.9751	18.999	18.923	-0.137375	1.79553	0.00701064	AT4G35240.4;AT4G35240.3;AT4G35240.2;AT4G35240.1	73;73;73;73	459390	1084200	513820	564630	1337300	805460	557830	380880	1	63.5748	2.69968e-14	120.53	107.65	120.53	1	FVASGGANVGDS(1)PR	FVAS(-64)GGANVGDS(64)PR	2	-0.59498
AT4G35310.2	552	S	22.0085	20.6231	20.8623	21.0419	21.0157	21.0776	20.9803	21.2912	-0.04275	0.349012	0.257826	AT4G35310.2;AT4G35310.1	552;552	3617700	3078300	1790400	1970000	5397500	3459100	2202600	1966500	1	93.1837	5.87402e-09	101.97	74.645	101.93	1	NSLNIS(1)MRDA	NS(-93)LNIS(93)MRDA	2	-2.4339
AT4G35470.2	167	S	19.1945	19.1638	18.1626	17.5233	19.1031	14.0934	17.8455	17.9104	-1.27295	0.802728	0.0744285	AT4G35470.2;AT4G35470.1	167;167	514430	1119500	0	171890	1433700	0	250770	188780	0.880954	8.70955	0.00128455	55.452	32.535	53.967	1	DMVS(0.119)RDDS(0.881)FVTK	DMVS(-8.7)RDDS(8.7)FVT(-33)K	2	-0.82952
AT4G35470.2	144	S	19.1398	17.7717	18.074	18.5549	18.9043	18.7065	18.855	20.2726	0.7995	0.0317702	1.15155	AT4G35470.2;AT4G35470.1	144;144	495290	0	0	351410	1249100	668640	0	0	0.998714	32.1595	7.78945e-10	106.01	85.167	106.01	1	S(0.001)DS(0.999)QS(0.001)SLNFSER	S(-32)DS(32)QS(-32)S(-41)LNFS(-76)ER	2	0.17928
AT4G36500.1	39	S	19.6453	19.747	20.0295	19.7923	19.9599	20.0467	19.7755	19.8867	0.113675	0.0698674	0.827975	AT4G36500.1	39	703130	1677200	1005200	828500	2596500	1692900	955540	742830	0.990197	23.0806	4.32744e-07	97.779	87.982	97.779	1	S(0.005)T(0.005)S(0.99)VPYYAPSIK	S(-23)T(-23)S(23)VPY(-43)Y(-49)APS(-68)IK	2	-0.1078
AT4G36630.2	806	S	17.9495	16.7676	18.077	17.9182	16.9228	17.6765	17.7362	17.6454	-0.18285	0.501512	0.164391	AT4G36630.2;AT4G36630.1	806;806	0	0	259700	226020	0	327430	232470	157100	0.986607	24.6932	0.000738313	52.555	33.284	52.555	1	IVALGS(0.987)FES(0.003)S(0.003)DT(0.003)T(0.003)K	IVALGS(25)FES(-25)S(-25)DT(-25)T(-25)K	2	0.17384
AT4G36970.1	219	S	17.1875	15.8874	17.5042	16.9757	16.9007	15.264	16.8527	17.158	-0.34485	0.554221	0.142132	AT4G36970.1	219	127990	0	174610	117600	311510	0	126010	112060	0.794968	8.98455	0.00166355	42.209	26.319	42.209	1	AEMT(0.1)T(0.1)AMQS(0.795)PVVS(0.004)R	AEMT(-9)T(-9)AMQS(9)PVVS(-23)R	2	-0.26641
AT4G36980.2	294	S	18.561	18.0571	17.8599	17.4095	18.2851	17.7488	17.6661	17.876	-0.077875	0.405139	0.217115	AT4G36980.2;AT4G36980.3;AT4G36980.1;AT4G36980.4	294;293;294;294	331600	519820	223420	158850	813200	344270	221440	184330	0.970181	16.7383	0.00880722	40.589	18.958	40.589	1	RS(0.97)PT(0.021)Y(0.008)EAY(0.001)PR	RS(17)PT(-17)Y(-21)EAY(-29)PR	2	-0.45935
AT4G37040.1	49	S	15.63	19.3183	16.8492	20.8986	19.7516	18.4612	19.5693	22.5606	1.91165	0.0561436	0.916254	AT4G37040.1	49	43481	1246000	0	1783700	2247400	0	828290	0	0.999777	36.73	8.65549e-10	105.17	93.123	105.17	1	TFS(1)GLTDLLFNR	T(-37)FS(37)GLT(-50)DLLFNR	2	0.12264
AT4G37100.1	653	S	13.2515	18.4136	14.1237	13.6714	15.6771	16.7746	17.4129	17.2948	1.9248	0.0403539	1.05192	AT4G37100.1	653	0	665530	0	0	0	0	185800	123210	1	41.2833	6.65666e-05	70.977	39.546	41.283	1	LLGVEDEHPS(1)K	LLGVEDEHPS(41)K	2	-0.99733
AT4G37300.1	13	S	17.5178	16.434	17.4236	17.3034	12.9279	14.4502	12.4068	17.1097	-2.94605	1.7599	0.00761528	AT4G37300.1	13	0	0	165120	147590	0	0	0	108370	0.999486	32.889	0.00364454	42.083	26.202	42.083	1	S(0.001)DEIS(0.999)DPEQQIK	S(-33)DEIS(33)DPEQQIK	2	-3.9413
AT4G37870.1	62	S	18.3857	20.0585	18.1796	17.9618	20.6761	20.6871	19.5399	19.0411	1.33965	0.0174294	1.40519	AT4G37870.1	62	293660	2081300	278850	232950	4265400	2638800	811580	413350	0.918549	7.51177	1.02148e-09	90.972	78.827	71.54	1;2	KRS(0.919)APT(0.541)T(0.541)PINQNAAAAFAAVSEEER	KRS(7.5)APT(0)T(0)PINQNAAAAFAAVS(-66)EEER	3	0.63241
AT4G37980.2	22	S	16.4383	18.4527	17.5492	16.759	19.1704	19.0346	19.6955	20.3056	2.25172	0.0012186	2.55247	AT4G37980.2;AT4G37980.1	22;22	76144	683860	180140	101200	1502100	839390	0	0	0.970071	18.1227	0.000158581	72.089	60.938	72.089	1	DESGILS(0.97)PFS(0.015)FS(0.015)R	DES(-44)GILS(18)PFS(-18)FS(-18)R	2	-0.57955
AT4G38130.2	416	S	19.296	18.0582	19.6185	19.2126	18.1708	19.5872	18.8798	19.5624	0.003725	0.298451	0.303624	AT4G38130.2;AT4G38130.1	416;416	0	0	755990	554370	0	1231100	513590	593270	1	44.3823	0.00130415	54.805	47.574	44.382	1	RWDPDS(1)DMDVDDDRK	RWDPDS(44)DMDVDDDRK	3	0.025803
AT4G38470.3	259	S	17.0843	17.6999	17.7766	17.203	16.3085	17.6271	17.7047	17.2644	-0.214775	0.539486	0.147975	AT4G38470.3;AT4G38470.2;AT4G38470.1	259;259;259	119150	405810	210890	137670	0	316410	227440	120640	0.909289	10.0384	0.00476277	54.234	44.829	54.234	1	IELQSQSWPMQQS(0.09)FS(0.909)PEK	IELQS(-40)QS(-33)WPMQQS(-10)FS(10)PEK	2	-2.665
AT4G38550.3	363	S	19.5863	18.6956	20.1494	19.5552	17.6409	18.5157	18.8009	19.3205	-0.927125	1.33918	0.0203583	AT4G38550.3;AT4G38550.1;AT4G38550.2;AT4G38550.5;AT4G38550.4	363;363;400;262;304	0	809250	1092300	702930	0	585810	486250	0	0.997793	29.1383	7.39575e-08	85	70.947	82.62	1;2	IVS(0.998)ENS(0.001)T(0.001)PVHHNYQIVAAETYEQDK	IVS(29)ENS(-29)T(-30)PVHHNY(-42)QIVAAET(-71)Y(-71)EQDK	3	3.2715
AT4G38550.3	240	S	20.5798	18.9793	19.4226	18.9632	18.4938	18.5374	18.4318	17.555	-1.23173	1.78489	0.0071859	AT4G38550.3;AT4G38550.1;AT4G38550.2;AT4G38550.5;AT4G38550.4	240;240;240;139;181	1343800	985080	659990	466350	939790	594690	376500	0	0.999272	31.6948	5.91923e-05	79.633	68.019	79.633	1	NSS(0.001)PPS(0.999)PFHPAAYK	NS(-43)S(-32)PPS(32)PFHPAAY(-56)K	2	0.33364
AT4G38550.3	153	S	19.0925	18.654	18.7418	18.4318	18.5587	17.7596	20.5965	18.2865	0.0703	0.265852	0.339311	AT4G38550.3;AT4G38550.1;AT4G38550.2;AT4G38550.5;AT4G38550.4	153;153;153;52;94	479320	786210	0	322650	983040	346850	0	245000	0.988456	19.3262	0.000125526	61.435	31.626	61.435	1	S(0.012)NAS(0.988)PFHPFR	S(-19)NAS(19)PFHPFR	2	-0.5145
AT4G38710.1	234	S	20.7569	19.9698	19.8728	19.9455	19.3949	18.6844	18.9908	19.3511	-1.03095	2.38165	0.00180738	AT4G38710.1;AT4G38710.2	234;234	1519400	1957200	901700	921320	1755100	658460	554670	512460	0.954156	13.4266	0.000611346	62.408	35.735	62.408	1	RGS(0.954)FES(0.043)LS(0.002)R	RGS(13)FES(-13)LS(-26)R	2	0.20626
AT4G38710.1	300	S	13.4478	13.7016	15.9132	13.8562	19.5138	19.2216	21.5344	19.9726	5.8309	5.81994e-05	3.87226	AT4G38710.1;AT4G38710.2	300;300	0	0	57959	0	1905800	955560	0	0	0.999992	51.2007	0.000126032	63.69	59.05	55.063	1	TLPVAVVEVVKPES(1)PVLVIVEK	T(-51)LPVAVVEVVKPES(51)PVLVIVEK	3	-0.069025
AT4G38900.3	321	S	18.0759	18.0726	18.2836	17.9437	17.9249	18.5615	18.3408	18.3806	0.208	0.050527	0.959279	AT4G38900.3;AT4G38900.2;AT4G38900.1	321;321;321	236920	525440	299700	230040	633560	604680	353490	261520	0.985287	18.4827	0.0418439	40.154	35.37	40.154	1	S(0.014)VS(0.985)VDS(0.001)CFMEK	S(-18)VS(18)VDS(-31)CFMEK	2	0.079927
AT4G39330.2	26	S	16.897	16.4582	18.9219	18.6228	14.9242	18.137	20.6064	15.1113	-0.53025	0.435508	0.198495	AT4G39330.2;AT4G39330.1	26;26	104640	0	466460	0	0	450570	0	27123	0.989659	20.0779	0.00161469	46.592	35.102	46.592	1	S(0.01)GVLS(0.99)PFHFS(0.001)R	S(-20)GVLS(20)PFHFS(-32)R	2	-0.14788
AT4G39490.1	253	S	21.3431	18.8612	19.3835	17.6525	21.2173	20.2181	19.2547	18.5597	0.502375	0.161221	0.508483	AT4G39490.1	253	2280900	0	642380	0	6207200	1906400	666010	296090	0.999999	59.7724	0.00244716	62.546	42.905	62.546	2	ARS(0.5)T(0.5)LDRVCS(1)K	ARS(0)T(0)LDRVCS(60)K	2	-0.27439
AT4G39680.2	311	S	13.0254	13.4912	12.8416	16.9093	17.7639	16.957	17.005	17.3066	3.19125	0.00370159	2.07123	AT4G39680.2;AT4G39680.1	311;311	0	0	0	112310	566640	198860	140040	124220	1	43.9912	2.90059e-05	79.633	68.143	43.991	1	ENNIIDAGDS(1)EK	ENNIIDAGDS(44)EK	2	0.56349
AT5G01400.2	1275	S	19.2918	19.4618	19.6201	19.3116	19.2558	19.9185	19.4349	19.0847	0.00215	0.297408	0.304682	AT5G01400.2;AT5G01400.3;AT5G01400.1	1275;1441;1442	550320	1376300	756860	593720	1593700	0	754610	426040	0.975554	16.0866	1.77248e-10	112.5	81.285	112.5	1	IDDTAT(0.024)S(0.976)ENEVTEIEK	IDDT(-35)AT(-16)S(16)ENEVT(-39)EIEK	2	-0.169
AT5G01400.2	471	S	18.1393	17.8033	17.8141	17.6096	17.4116	17.0448	16.7621	17.254	-0.72345	2.47724	0.00144949	AT5G01400.2;AT5G01400.3;AT5G01400.1	471;637;631	0	435970	216450	182490	443880	211330	118340	119770	1	58.9807	0.0020573	58.981	38.46	58.981	1	LEEFS(1)PK	LEEFS(59)PK	2	-0.66519
AT5G01400.2	1170	S	17.9738	16.9584	17.1782	16.5074	17.8024	18.7152	16.8494	16.7698	0.37975	0.129822	0.587731	AT5G01400.2;AT5G01400.3;AT5G01400.1	1170;1336;1337	220730	0	139290	85007	581990	0	125720	85625	0.998428	28.5162	1.34462e-13	122.34	108.43	122.34	1	SEMSQSQNS(0.998)PIDT(0.001)GR	S(-89)EMS(-66)QS(-38)QNS(29)PIDT(-29)GR	2	-0.48283
AT5G02770.1	76	S	20.2326	20.4549	20.468	20.5086	20.7241	20.5583	20.4335	20.6056	0.16435	0.0236688	1.27539	AT5G02770.1	76	1056400	2739500	1362200	1361200	4409800	2413500	1507800	1222600	0.999991	50.3872	4.67887e-78	177.14	165.62	177.14	1	KEETDSNGIGSTAGVDSGDIS(1)PVDDIQK	KEET(-140)DS(-140)NGIGS(-120)T(-110)AGVDS(-50)GDIS(50)PVDDIQK	3	0.4189
AT5G02850.1	20	S	18.8778	19.1964	19.2923	19.0582	19.0813	19.0087	18.8885	18.8871	-0.139775	0.960098	0.0504261	AT5G02850.1	20	413030	1145100	603030	498090	1412200	824430	516710	371500	0.9981	28.2116	3.40806e-16	121.19	106.31	121.19	1	LGLTGPGS(0.998)PS(0.002)VQNPTPTR	LGLT(-34)GPGS(28)PS(-28)VQNPT(-71)PT(-78)R	2	0.071621
AT5G02850.1	9	S	18.6269	18.7968	18.9563	18.866	18.8027	18.7836	18.7317	18.5426	-0.09635	0.778124	0.0791866	AT5G02850.1	9	347100	868020	477730	435970	1164200	705340	463490	292590	1	63.7269	5.49838e-05	75.479	67.568	63.727	1	MLQHQIVQS(1)PAR	MLQHQIVQS(64)PAR	2	0.70771
AT5G03040.3	433	S	19.9232	19.895	20.5921	20.6497	19.8762	20.099	20.5401	20.7717	0.05675	0.240752	0.371043	AT5G03040.3;AT5G03040.2;AT5G03040.1	433;433;433	852470	1858300	1484600	1501100	2450100	1755400	1623400	1371800	0.900538	9.57168	7.61224e-06	95.401	51.857	77.64	1	LSYPT(0.099)S(0.901)PALPK	LS(-58)Y(-41)PT(-9.6)S(9.6)PALPK	2	0.26035
AT5G03040.3	406	S	20.1588	18.9298	19.0586	18.6126	18.7186	19.0223	18.827	18.3406	-0.462825	0.89892	0.0585909	AT5G03040.3;AT5G03040.2;AT5G03040.1	406;406;406	0	951870	512840	365730	1098300	832230	495130	254370	0.999992	53.9287	5.01329e-06	80.609	68.033	74.786	1	PQS(1)PLGGTTQENEGFTDK	PQS(54)PLGGT(-54)T(-54)QENEGFT(-65)DK	2	-1.7023
AT5G03040.3	360	S	17.9965	17.8468	17.7147	17.4997	17.5816	17.1686	17.5664	17.4117	-0.33235	1.5347	0.012868	AT5G03040.3;AT5G03040.2;AT5G03040.1	360;360;360	224230	449330	202030	169100	499390	230270	206660	133610	0.920474	14.6847	0.00380359	40.727	28.371	40.727	1	S(0.031)T(0.031)IS(0.92)VLS(0.017)ER	S(-15)T(-15)IS(15)VLS(-17)ER	2	0.96989
AT5G03040.3	363	S	20.0616	19.3268	19.3378	19.2024	19.2418	12.7886	28.0241	15.2841	-0.6475	0.370144	0.24142	AT5G03040.3;AT5G03040.2;AT5G03040.1	363;363;363	938320	1253400	0	550430	1578400	0	0	30574	0.999201	30.9714	0.000117732	82.417	65.453	82.417	1	STIS(0.001)VLS(0.999)ER	S(-67)T(-67)IS(-31)VLS(31)ER	2	1.3036
AT5G03280.1	645	S	19.2677	19.8196	19.7729	19.1908	19.9275	19.5652	19.3935	19.3959	0.057775	0.218141	0.403561	AT5G03280.1	645	541220	1763700	841400	546030	2538700	1212500	733240	528610	0.999969	45.0312	7.48351e-23	134.37	116.97	133.16	1	AAPTSNFTVGSDGPPS(1)FR	AAPT(-120)S(-110)NFT(-88)VGS(-45)DGPPS(45)FR	2	-0.22337
AT5G03280.1	655	S	16.007	17.9216	21.3242	17.0607	14.8812	17.9685	13.3315	12.9527	-3.2949	1.35547	0.0195916	AT5G03280.1	655	0	473220	0	124740	0	400890	0	0	0.884292	8.99765	3.48223e-05	82.908	51.477	82.908	1	SLS(0.002)GEGGS(0.884)GT(0.111)GS(0.002)LSR	S(-59)LS(-26)GEGGS(9)GT(-9)GS(-26)LS(-35)R	2	-0.84887
AT5G03280.1	659	S	17.7956	16.652	17.5897	17.8246	15.1477	17.5367	17.1759	17.0379	-0.740925	0.877525	0.0617701	AT5G03280.1	659	0	0	185270	211820	0	297190	157650	103110	0.836272	8.11151	1.27682e-06	96.673	69.887	96.673	1	SLSGEGGS(0.001)GT(0.033)GS(0.836)LS(0.129)R	S(-94)LS(-72)GEGGS(-28)GT(-14)GS(8.1)LS(-8.1)R	2	-0.39374
AT5G03280.1	757	S	17.1735	17.9302	18.5645	15.8594	18.3832	18.7926	18.1076	20.1196	1.46885	0.0204234	1.33782	AT5G03280.1	757	126750	476070	0	0	870430	709760	300720	0	0.99937	34.0543	4.36827e-07	100.55	85.521	100.55	1	TPGS(0.999)IDSLYGLQR	T(-36)PGS(34)IDS(-34)LY(-65)GLQR	2	0.6053
AT5G03630.1	417	S	19.7951	19.28	19.963	19.1412	20.0972	19.2332	19.4496	19.2844	-0.028725	0.33639	0.268333	AT5G03630.1	417	780080	1213400	959900	527580	2855600	963260	762320	489300	0.998312	27.7269	0.000197809	69.01	54.657	69.01	1	AQPS(0.998)VES(0.002)LEVLSK	AQPS(28)VES(-28)LEVLS(-55)K	2	-0.34612
AT5G03660.2	27	S	20.4177	20.809	20.2235	20.1285	20.1133	20.395	19.9978	20.0823	-0.247575	0.992171	0.0466361	AT5G03660.2;AT5G03660.3;AT5G03660.1	27;27;27	1201000	3501700	1149900	1045900	2887800	2155200	1114700	850650	0.984626	20.2501	8.74529e-39	151.56	129.56	132.08	1	DQLSES(0.009)MS(0.985)FS(0.005)S(0.001)QMK	DQLS(-42)ES(-20)MS(20)FS(-23)S(-30)QMK	2	-0.6942
AT5G04280.1	15	S	16.4499	17.5134	18.4116	17.9334	17.9532	18.1904	18.8447	18.362	0.7605	0.0334856	1.12956	AT5G04280.1	15	76755	356600	327490	228400	646090	0	501240	258170	0.984826	18.1227	0.000158581	72.089	48.103	72.089	1	IFVGGLS(0.985)PEVT(0.015)DR	IFVGGLS(18)PEVT(-18)DR	2	0.53034
AT5G04280.1	295	S	17.7232	17.8868	17.6685	17.5598	17.5213	16.7819	17.3674	17.4161	-0.4379	1.5952	0.0111727	AT5G04280.1;AT5G04280.5;AT5G04280.4;AT5G04280.3;AT5G04280.2	295;257;257;257;257	185530	461940	195660	0	478950	0	0	134020	0.99972	39.3611	0.00182036	47.666	36.052	47.666	1	S(1)GGGGAYPSSSTFDRY	S(39)GGGGAY(-39)PS(-44)S(-44)S(-44)T(-44)FDRY(-48)	2	-1.753
AT5G04430.1	11	S	21.9701	22.0797	22.3376	22.2067	22.0959	22.2746	22.0047	22.2298	0.002725	0.292147	0.310098	AT5G04430.1;AT5G04430.2	11;11	3522700	8448600	4977900	4416800	11412000	7930100	4480400	3769100	1	95.6855	0	294.14	283.23	284.15	1	MESTESYAAGS(1)PEELAK	MES(-180)T(-150)ES(-96)Y(-140)AAGS(96)PEELAK	2	-0.34744
AT5G04430.1	19	S	20.9844	15.0415	14.9597	19.2575	20.5265	18.101	19.075	18.7492	1.55215	0.0889858	0.732197	AT5G04430.1;AT5G04430.2	19;19	1778800	64281	0	571880	3845300	439450	588010	337640	0.999982	47.7144	1.40277e-92	202.43	149.91	101.94	1;2	RS(1)PEPHDSSEADSAEK	RS(48)PEPHDS(-48)S(-59)EADS(-86)AEK	3	-0.036224
AT5G04870.1	605	S	21.9079	20.6978	21.0092	20.7832	20.3495	20.7348	20.6404	21.0581	-0.403825	0.911743	0.0567697	AT5G04870.1	605	3374100	3241800	0	1646600	3401500	2727500	0	1673000	0.99992	40.9695	0.000479699	68.224	18.183	68.224	1	SFS(1)IALK	S(-41)FS(41)IALK	2	-0.18728
AT5G04870.1	52	S	21.511	20.7126	20.8826	20.5285	20.7239	20.7905	20.4462	22.9836	0.327375	0.160871	0.509262	AT5G04870.1	52	0	3275300	1815700	0	4409100	2834900	1521100	0	0.915289	10.3362	6.33469e-07	90.694	81.875	62.193	1	S(0.085)RLS(0.915)DEVQNKPPEQVTMPK	S(-10)RLS(10)DEVQNKPPEQVT(-58)MPK	3	-0.27502
AT5G04930.1	40	S	20.4662	19.7311	20.7176	20.6706	19.5453	19.422	20.4418	21.0156	-0.2902	0.571783	0.135519	AT5G04930.1	40	1242100	1658800	0	0	1947900	1097900	0	0	1	64.3863	4.49292e-08	96.604	51.741	96.604	1	EVTFGDLGS(1)K	EVT(-64)FGDLGS(64)K	2	-0.20851
AT5G04930.1	6	S	20.1749	19.3617	18.6721	18.436	19.1381	20.3588	18.8479	20.0473	0.43685	0.108579	0.655197	AT5G04930.1	6	1015000	1284100	392300	323610	1468900	2101700	502370	830310	1	67.0215	0.00014396	67.251	51.308	67.251	1;2	S(1)IDKPPHHDPILGVSSR	S(67)IDKPPHHDPILGVS(-67)S(-67)R	3	-0.12106
AT5G04990.1	63	S	18.877	17.2543	18.7094	18.2411	18.3614	18.0487	17.895	18.0843	-0.1731	0.479869	0.174724	AT5G04990.1	63	412820	0	402580	282710	857380	0	259520	212970	0.997811	26.6262	4.56591e-07	90.316	74.22	90.316	1	GEAT(0.002)LDRS(0.998)QGQDLGPVTR	GEAT(-27)LDRS(27)QGQDLGPVT(-47)R	3	0.17896
AT5G04990.1	77	S	17.8573	16.4359	17.2391	17.2505	15.0249	16.588	16.2661	16.5532	-1.08765	1.5245	0.0131781	AT5G04990.1	77	203600	0	145300	142280	0	153980	83908	73689	0.981001	18.2949	0.000196398	60.401	42.263	57.804	1	S(0.015)VS(0.981)AAT(0.004)GTNTTATQR	S(-18)VS(18)AAT(-24)GT(-34)NT(-42)T(-48)AT(-48)QR	2	0.25666
AT5G05040.1	3	S	19.3192	19.2768	19.4173	19.2593	18.2322	18.5665	18.4758	18.9581	-0.76	2.87034	0.000585824	AT5G05040.1;AT5G05060.1	3;3	560880	1210700	657580	572590	783970	606810	388150	390250	1	50.3534	0.00837591	50.353	43.133	50.353	1	MLS(1)PIENER	MLS(50)PIENER	2	-0.44599
AT5G05170.1	176	S	21.0121	20.6658	19.903	19.349	19.0367	19.1541	17.7045	18.0227	-1.75298	2.12026	0.00330493	AT5G05170.1	176	1813400	3170800	920830	609340	1369200	911840	227410	204060	0.999931	43.0582	0.000579797	78.234	59.78	78.234	1	RLPYSSDVNQS(1)PNRR	RLPY(-60)S(-47)S(-43)DVNQS(43)PNRR	3	0.19321
AT5G05170.1	151	S	18.1704	16.9587	17.8131	17.7278	17.4041	17.2044	17.4856	18.8467	0.0677	0.254224	0.353497	AT5G05170.1	151	252950	0	216290	198070	441580	236060	0	0	0.980342	16.9807	0.000213988	65.472	54.642	65.092	1	QDTSGEFS(0.02)AAS(0.98)PER	QDT(-53)S(-52)GEFS(-17)AAS(17)PER	2	-0.76695
AT5G05600.1	29	S	16.8404	16.6768	16.5201	16.6064	16.3876	16.7463	16.2442	16.3724	-0.2233	1.18669	0.0292163	AT5G05600.1;AT5G05600.2	29;29	100620	199690	88269	91042	218270	171830	82644	65008	0.999499	34.1789	7.96269e-05	75.462	55.081	75.462	1	VQS(0.999)LAESNLSSLPDR	VQS(34)LAES(-34)NLS(-42)S(-42)LPDR	2	0.49782
AT5G06140.1	19	S	17.4515	17.84	19.2467	17.9004	15.0675	16.974	17.5985	17.2367	-1.39048	1.34824	0.0199284	AT5G06140.1	19	153690	447200	0	0	0	201210	211310	118350	0.759483	8.02275	0.000940533	47.532	35.149	47.532	1	S(0.759)PS(0.12)S(0.12)HPYLSVSVT(0.001)DPVK	S(8)PS(-8)S(-8)HPY(-39)LS(-37)VS(-37)VT(-31)DPVK	2	0.70634
AT5G06160.1	373	S	18.1872	17.1551	18.2291	18.3177	17.516	18.4702	20.3289	19.7688	1.0487	0.0409954	1.04538	AT5G06160.1	373	255920	0	288590	298130	0	0	1402300	684510	0.911334	10.1582	0.000242472	48.848	41.401	48.112	1	EGEEANT(0.088)ELES(0.911)DDEDGLIY(0.001)NPLK	EGEEANT(-10)ELES(10)DDEDGLIY(-31)NPLK	2	0.11422
AT5G06440.6	320	S	20.3693	20.568	20.6391	20.4505	20.3366	20.6544	19.9741	20.4872	-0.14365	0.704121	0.0956318	AT5G06440.6;AT5G06440.5;AT5G06440.3;AT5G06440.2;AT5G06440.4	320;335;409;409;416	1161400	2963000	1533800	1307500	3371200	2579600	1096600	0	0.998521	28.2962	3.89523e-09	99.387	77.377	99.387	1	NITPVPET(0.001)EELS(0.999)PNRADDQAK	NIT(-62)PVPET(-28)EELS(28)PNRADDQAK	3	0.14965
AT5G06560.1	257	S	18.5931	18.6826	18.8287	18.4747	17.1566	18.5564	18.1385	18.2463	-0.620325	1.32958	0.0208246	AT5G06560.1	257	339060	801990	437280	332390	0	602580	307230	238270	0.999937	42.6022	0.00015922	73.91	55.13	57.804	1	NPS(1)FTQPTGDVSGGR	NPS(43)FT(-43)QPT(-52)GDVS(-58)GGR	2	-2.2261
AT5G06560.1	238	S	18.2848	18.1359	20.0853	17.4107	17.164	17.5875	16.6982	16.6065	-1.46512	1.57085	0.0118256	AT5G06560.1	238	0	549000	0	158990	373880	307840	113210	76464	0.999864	38.6619	0.00122105	49.813	18.441	49.813	1	YPLADS(1)PHPLK	Y(-39)PLADS(39)PHPLK	2	-1.1703
AT5G06660.1	85	S	20.3743	19.6586	20.3759	18.8067	13.9292	12.9343	12.3788	15.7879	-6.04632	3.74978	7.73113e-05	AT5G06660.1	85	1165400	0	0	418420	0	0	0	43352	0.938826	11.8602	0.000838835	83.081	26.722	83.081	1	IDRVES(0.939)S(0.061)LK	IDRVES(12)S(-12)LK	2	0.25154
AT5G07120.3	135	S	20.318	20.5226	20.2594	20.0597	20.662	20.4871	20.2573	20.0011	0.06195	0.197614	0.437034	AT5G07120.3;AT5G07120.2;AT5G07120.1	135;135;135	1120800	2871100	1178800	997230	4223900	2297200	1334400	804120	0.999712	35.4291	1.71813e-30	142.1	80.281	142.1	1	SPS(1)SLSSDYIK	S(-63)PS(35)S(-35)LS(-60)S(-67)DY(-100)IK	2	0.43098
AT5G07350.1	975	S	20.0039	21.5112	21.448	20.9637	22.0904	22.3205	22.4072	21.1171	1.0021	0.0156838	1.45015	AT5G07350.1;AT5G07350.2	975;975	901550	5696900	2687000	1866100	11369000	8186800	5921900	1742900	0.999994	52.0755	0	294.22	281.76	243.29	1	IGIWQYGDIES(1)DDEDTGPAR	IGIWQY(-150)GDIES(52)DDEDT(-52)GPAR	2	-2.2141
AT5G07890.2	24	S	21.1477	23.5976	19.3496	21.9234	25.0224	24.6357	23.6541	22.4179	2.42795	0.0134889	1.51453	AT5G07890.2;AT5G07890.5;AT5G07890.4;AT5G07890.3;AT5G07890.1	24;105;105;105;105	1992100	24195000	627430	3629200	86763000	40743000	14055000	4294000	1	81.106	1.2406e-07	105.2	77.767	105.2	1	EIDYLRDQLIFRS(1)K	EIDY(-81)LRDQLIFRS(81)K	2	-1.094
AT5G08610.1	110	S	19.4328	17.9786	19.2001	18.9139	18.3177	18.7024	18.6464	18.612	-0.311725	0.719019	0.0920391	AT5G08610.1	110	606830	0	0	450690	0	666730	436870	307010	0.982783	17.565	1.21943e-06	97.551	75.678	93.345	1	FT(0.017)S(0.983)DEDNADPEVVR	FT(-18)S(18)DEDNADPEVVR	2	-0.54682
AT5G08610.1	93	S	12.7223	14.6756	14.91	11.2278	18.5557	16.6321	18.9517	17.5064	4.52755	0.000933868	2.66795	AT5G08610.1	93	0	0	0	0	980990	158750	539820	142670	0.989687	19.8424	1.00389e-06	78.373	59.778	65.172	1	SLIEDEAELS(0.99)DWVS(0.01)DLR	S(-43)LIEDEAELS(20)DWVS(-20)DLR	2	-1.7398
AT5G08660.4	572	S	18.057	13.0181	16.0556	12.8226	18.0618	17.3407	15.7525	16.9599	2.0404	0.0414146	1.04117	AT5G08660.4;AT5G08660.3;AT5G08660.1	572;572;572	233830	0	0	0	696630	259450	0	97685	0.999999	61.7467	2.05389e-06	80.979	71.692	72.652	1	S(1)QDFDSEYSR	S(62)QDFDS(-62)EY(-68)S(-70)R	2	0.1641
AT5G09250.5	15	S	17.156	17.8591	17.4587	18.2209	18.0783	16.9987	16.6552	16.8753	-0.5218	0.9346	0.0536716	AT5G09250.5;AT5G09250.2;AT5G09250.1;AT5G09250.4	15;15;15;15	125220	453170	169180	0	704630	204680	109890	92119	0.999878	39.1577	3.00011e-11	107.03	92.575	107.03	1	DEDVRAS(1)DDESETHAPAK	DEDVRAS(39)DDES(-39)ET(-60)HAPAK	3	-0.227
AT5G09400.1	80	S	15.2417	17.8761	14.9523	16.8219	18.7304	17.2695	17.3422	17.7243	1.5436	0.0200539	1.34557	AT5G09400.1	80	33222	458530	0	105710	1107300	246940	176910	165940	1	93.8227	1.17221e-06	93.823	78.557	93.823	1	VDS(1)FDVEALEVPGAPR	VDS(94)FDVEALEVPGAPR	2	-0.45729
AT5G09620.2	15	S	15.3954	19.9734	11.1261	20.7716	12.3769	14.5642	20.1168	12.1736	-2.00875	0.589408	0.129239	AT5G09620.2;AT5G09620.1	15;15	36957	1962100	0	0	0	0	1210600	0	0.795708	6.40773	4.3604e-63	173.19	159.84	138.81	1	FSYNSYPDS(0.022)AES(0.796)S(0.182)PR	FS(-100)Y(-110)NS(-52)Y(-70)PDS(-16)AES(6.4)S(-6.4)PR	2	-0.34729
AT5G09620.2	148	S	16.9229	16.5156	17.3016	17.1071	15.7629	16.7046	17.1603	16.9127	-0.326675	0.716192	0.0927091	AT5G09620.2;AT5G09620.1	148;148	0	178580	0	128820	0	0	155950	94544	0.879304	10.2475	0.000287242	63.134	38.753	63.134	1	LFLFPS(0.083)S(0.879)PIS(0.009)GGFGS(0.009)EGS(0.01)T(0.01)K	LFLFPS(-10)S(10)PIS(-20)GGFGS(-20)EGS(-19)T(-19)K	2	1.5071
AT5G09620.2	156	S	18.0868	19.7517	19.8626	20.5291	17.8276	20.2079	20.0109	19.8389	-0.086225	0.340441	0.2649	AT5G09620.2;AT5G09620.1	156;156	238720	1682600	0	0	0	1893000	0	718620	0.758633	7.98413	3.54585e-24	130.11	107.19	127.22	1	LFLFPSSPISGGFGS(0.759)EGS(0.121)T(0.121)K	LFLFPS(-90)S(-83)PIS(-47)GGFGS(8)EGS(-8)T(-8)K	2	1.0949
AT5G09620.2	162	S	20.8686	20.8678	19.8949	19.7899	19.6072	20.4338	19.3743	20.3248	-0.420275	0.783465	0.0781263	AT5G09620.2;AT5G09620.1	162;162	0	3647200	915630	827100	2033300	0	723560	0	0.766069	5.15186	0.00150873	65.184	50.094	65.184	1	S(0.766)DRDT(0.234)LNPIPSRPESEK	S(5.2)DRDT(-5.2)LNPIPS(-55)RPES(-61)EK	3	0.15092
AT5G09850.3	283	S	19.158	17.5047	18.6124	18.5681	17.3618	18.2996	19.0303	18.8787	-0.0682	0.347532	0.259029	AT5G09850.3;AT5G09850.5;AT5G09850.4;AT5G09850.2;AT5G09850.1	283;283;283;283;283	501570	0	376410	354620	0	0	570080	369350	0.968322	19.6239	0.000232208	70.529	58.146	40.577	1	PS(0.011)RPS(0.968)PS(0.011)QQT(0.011)IPR	PS(-20)RPS(20)PS(-20)QQT(-20)IPR	2	0.38625
AT5G09850.3	104	S	18.354	16.9789	18.8223	16.9142	16.0815	17.2025	17.2516	17.5479	-0.746475	0.90946	0.0570896	AT5G09850.3;AT5G09850.5;AT5G09850.4;AT5G09850.2;AT5G09850.1	104;104;104;104;104	0	246200	0	112690	0	235740	166140	146840	1	69.7372	3.1623e-05	69.737	57.945	69.737	1	S(1)VNVEDDDDFDPFAGLFDDEQK	S(70)VNVEDDDDFDPFAGLFDDEQK	2	-0.20814
AT5G09870.1	126	S	18.3326	17.0543	17.2133	17.4886	17.8943	16.9847	17.4749	17.3031	-0.10795	0.418586	0.20861	AT5G09870.1	126	283050	0	142720	167810	620230	202710	193950	123920	0.864265	8.15211	7.24115e-05	65.5	39.764	65.5	1	SGLES(0.003)ET(0.132)FS(0.864)R	S(-62)GLES(-24)ET(-8.2)FS(8.2)R	2	0.88831
AT5G09890.1	303	S	17.3247	15.0013	17.9172	19.3886	20.2844	19.8511	20.5267	21.3366	3.09175	0.00401926	2.03562	AT5G09890.1;AT5G09890.2	303;303	140750	0	232480	626280	3251300	1478200	0	0	0.982119	17.4547	2.98892e-31	140.81	116.77	134.85	1	ALAYS(0.982)T(0.018)VGTLDYMAPEVLLK	ALAY(-36)S(17)T(-17)VGT(-54)LDY(-82)MAPEVLLK	2	0.12163
AT5G09960.2	26	S	17.3234	18.3766	19.4666	18.3548	19.1868	19.0756	20.0638	18.862	0.9167	0.0275912	1.21074	AT5G09960.2;AT5G09960.3;AT5G09960.1	26;52;54	140630	648690	680450	305890	1519300	863560	1166900	365110	0.993842	28.1034	2.28568e-16	90.672	84.705	62.942	1	AS(0.994)LGNEEELIKPPES(0.002)AT(0.002)S(0.002)T(0.001)AELTTVQSENQR	AS(28)LGNEEELIKPPES(-28)AT(-28)S(-28)T(-28)AELT(-42)T(-48)VQS(-61)ENQR	3	0.27073
AT5G09960.2	58	S	19.5459	18.1927	19.319	19.1657	19.734	21.3301	19.2943	19.2153	0.8376	0.0447482	1.00919	AT5G09960.2;AT5G09960.3;AT5G09960.1	58;84;86	0	0	614280	536640	2220100	0	684520	466430	0.995366	23.4386	4.93529e-14	116.94	105.8	101.29	2	EFS(0.995)PS(0.005)HHHQPHS(0.847)PS(0.071)T(0.082)R	EFS(23)PS(-23)HHHQPHS(10)PS(-11)T(-10)R	3	-0.095734
AT5G09960.2	67	S	19.4253	18.2862	19.319	19.1657	19.734	20.1465	19.2943	19.2153	0.548475	0.0351316	1.10953	AT5G09960.2;AT5G09960.3;AT5G09960.1	67;93;95	0	0	614280	536640	2220100	0	684520	466430	0.908651	12.9	4.93529e-14	116.94	105.8	49.577	2	EFS(0.923)PS(0.077)HHHQPHS(0.909)PS(0.044)T(0.048)R	EFS(11)PS(-11)HHHQPHS(13)PS(-13)T(-13)R	4	-0.077529
AT5G10010.1	73	S	20.3209	20.0194	20.0284	19.7437	20.3876	20.0251	20.0322	19.4564	-0.052775	0.38562	0.230261	AT5G10010.1	73	0	2025700	1004400	801030	3492400	1667700	1141600	551270	1	91.407	3.41329e-38	138.84	124.03	91.407	1	GDQEEEEDAKPDS(1)LEEDEENQEDEVK	GDQEEEEDAKPDS(91)LEEDEENQEDEVK	3	-0.87233
AT5G10020.2	696	S	13.6968	17.5986	15.2744	13.7253	17.3317	17.5426	17.6599	17.4861	2.4313	0.00846205	1.71454	AT5G10020.2;AT5G10020.1	696;744	0	378310	0	0	419960	298420	220490	140680	0.999009	30.3027	0.00135431	65.092	55.139	48.112	1	FSDQPVMLDVY(0.001)S(0.999)PDR	FS(-42)DQPVMLDVY(-30)S(30)PDR	2	-0.25396
AT5G10470.1	674	S	17.8786	18.0705	17.4678	17.3399	16.2187	17.8931	17.2787	18.0751	-0.3228	0.60001	0.125624	AT5G10470.1	674	206640	524680	170260	151370	0	380470	0	211610	1	45.9154	0.000405542	57.019	34.102	45.915	1	AS(1)PNIQPANVNR	AS(46)PNIQPANVNR	2	-0.2699
AT5G10470.1	46	S	19.7398	19.5899	18.8458	18.9581	19.5829	19.4656	18.7271	18.8684	-0.1224	0.452465	0.188965	AT5G10470.1;AT5G10470.2	46;46	750740	1504100	442490	464700	1999400	1131600	462010	366740	0.968024	18.1073	1.82412e-06	92.856	84.931	65.395	1	RNS(0.968)IS(0.015)T(0.015)PS(0.002)LPPK	RNS(18)IS(-18)T(-18)PS(-27)LPPK	2	0.35244
AT5G10470.1	1050	S	18.7121	18.9566	17.4524	20.5766	18.9602	21.2524	19.7012	23.2062	1.85558	0.0347908	1.1136	AT5G10470.1;AT5G10470.2	1050;1051	0	969730	168450	0	0	3904700	907560	0	0.96483	14.4716	4.52283e-73	171.06	150.62	141.1	1	SDAALLNLEEGS(0.034)S(0.965)PIPNPS(0.001)TAAEDSR	S(-91)DAALLNLEEGS(-14)S(14)PIPNPS(-32)T(-39)AAEDS(-74)R	2	0.59448
AT5G10470.1	668	S	18.6121	18.5819	19.1652	18.9856	20.1116	19.8817	19.794	19.9336	1.09402	9.72929e-05	3.64967	AT5G10470.1;AT5G10470.2	668;668	343560	747920	552180	473630	2884300	1509900	967870	767380	0.968118	14.8253	1.68432e-63	180.74	158.16	121.13	1	SMAVSTQVLS(0.968)PS(0.032)LR	S(-99)MAVS(-64)T(-50)QVLS(15)PS(-15)LR	2	0.083856
AT5G10540.1	686	S	14.5439	12.1823	13.189	18.5725	18.9936	18.3918	18.2691	18.2825	3.86233	0.0074615	1.76869	AT5G10540.1;AT5G65620.1;AT5G65620.2	686;774;788	0	0	0	355710	1328900	537600	336350	244330	1	66.2625	0.00100092	66.262	44.026	66.262	1	GREPS(1)PEPLLR	GREPS(66)PEPLLR	2	0.072522
AT5G10940.2	506	S	18.6806	20.2606	20.8351	19.7925	20.4456	20.8744	21.0003	19.6872	0.609675	0.0720053	0.815925	AT5G10940.2;AT5G10940.1	506;509	360270	2394300	0	828600	3635600	3004700	2233400	646900	0.999959	43.8338	9.42284e-16	120.06	99.284	120.06	1	VLS(1)LSDILYR	VLS(44)LS(-44)DILY(-96)R	2	0.0025125
AT5G10950.1	346	S	17.8802	20.9903	18.5925	20.1085	21.4226	20.8091	20.5157	19.989	1.29123	0.0323131	1.14446	AT5G10950.1	346	206860	3970500	371240	1031500	7156200	2871600	1596100	797400	0.999999	62.6633	4.02281e-09	110.77	92.637	110.77	1	AVDEMS(1)DGEPLVSFLK	AVDEMS(63)DGEPLVS(-63)FLK	2	0.073531
AT5G11110.1	159	S	16.5932	17.3424	17.9451	18.0891	19.1032	19.0326	19.0664	18.2416	1.3685	0.00302976	2.15791	AT5G11110.1	159	84774	0	237010	254430	1433800	838210	584510	237500	0.987389	18.9373	1.32452e-06	96.464	78.664	96.464	1	IS(0.013)S(0.987)VDVFENWFAQHK	IS(-19)S(19)VDVFENWFAQHK	2	-1.2769
AT5G11260.1	36	S	19.2955	18.8727	18.8637	18.5189	18.9733	18.898	18.7911	20.1768	0.3221	0.0988317	0.691367	AT5G11260.1;AT5G11260.2	36;36	551750	914950	448020	342740	1310300	763520	482970	0	1	40.7149	2.36665e-08	99.283	83.145	40.715	1	EGIES(1)DEEIR	EGIES(41)DEEIR	2	-0.46984
AT5G11270.1	114	S	22.7631	18.4413	15.8637	18.8731	16.1793	17.6913	18.1113	17.6525	-1.5767	0.783496	0.0781201	AT5G11270.1	114	0	678470	56003	438120	0	330800	301500	157880	0.998858	29.4181	4.76242e-10	96.993	78.628	56.147	1	NDNS(0.999)DDEEIS(0.001)EEELEALADELAR	NDNS(29)DDEEIS(-29)EEELEALADELAR	2	-0.24274
AT5G11710.3	234	S	17.0672	16.4675	17.4719	17.3349	16.3947	17.3367	15.7294	16.9841	-0.47415	0.825972	0.070218	AT5G11710.3;AT5G11710.2;AT5G11710.1	234;234;234	117750	172720	0	0	219360	0	57844	0	0.970653	16.2518	0.000312243	62.042	40.283	62.042	1	Y(0.006)GS(0.971)T(0.023)DHDNLSSGK	Y(-22)GS(16)T(-16)DHDNLS(-35)S(-41)GK	2	0.067227
AT5G11970.1	56	S	19.7223	19.5212	20.3921	19.9769	19.304	19.6608	19.7479	19.8278	-0.268	0.870036	0.0629262	AT5G11970.1	56	0	1434200	1292400	941610	1647900	1295600	937450	713110	0.999999	60.3988	3.0931e-07	90.653	80.421	90.653	1	S(1)WGITDPELQR	S(60)WGIT(-60)DPELQR	2	0.028367
AT5G12080.3	57	S	17.8829	16.9836	16.3062	15.9149	17.3023	15.8968	15.8911	15.8645	-0.533225	0.72542	0.0905419	AT5G12080.3;AT5G12080.2;AT5G12080.1	57;57;57	207250	247000	76105	56376	411480	95365	64706	0	1	51.2675	0.0067298	51.268	23.255	51.268	1	LVGS(1)PNKPPR	LVGS(51)PNKPPR	2	-0.17383
AT5G12350.1	820	S	19.3498	19.2244	21.2742	19.0476	19.0346	19.2505	20.2075	21.0487	0.161325	0.230889	0.384723	AT5G12350.1;AT5G19420.3;AT5G19420.1;AT5G19420.2	820;824;824;858	572900	1167500	0	494460	1367200	974870	0	0	0.977144	16.7168	8.8897e-06	77.379	70.251	76.143	1	FFS(0.021)AS(0.977)VPGS(0.002)R	FFS(-17)AS(17)VPGS(-27)R	2	0.113
AT5G12350.1	736	S	17.7227	16.0026	17.2673	16.8351	15.7554	16.8296	16.5175	16.9415	-0.445925	0.740784	0.0870567	AT5G12350.1	736	185470	0	148160	106680	0	182050	99881	96445	0.831818	6.94248	0.00744571	40.725	20.298	40.725	1	RGS(0.832)INQGS(0.168)DPIDK	RGS(6.9)INQGS(-6.9)DPIDK	2	0.32705
AT5G12850.1	18	S	13.9945	13.4407	17.7364	15.2593	19.6494	19.2328	17.9415	18.3054	3.67455	0.00262235	2.22044	AT5G12850.1	18	0	0	205100	0	2093600	0	0	248240	0.974221	16.224	8.31229e-05	70.533	55.763	70.449	1	KLDIEDTLT(0.001)S(0.023)LS(0.974)DQENES(0.001)LAK	KLDIEDT(-39)LT(-28)S(-16)LS(16)DQENES(-30)LAK	3	-0.092079
AT5G12850.1	502	S	15.1433	18.4726	19.6783	19.0755	19.2025	18.5557	18.7432	18.0433	0.54375	0.161242	0.508437	AT5G12850.1	502	31032	693340	788000	504100	1535900	602280	467180	207000	0.999977	46.7075	3.50665e-16	117.26	95.104	67.364	1	TLNPSNLEELFSAEVAS(1)PR	T(-64)LNPS(-59)NLEELFS(-47)AEVAS(47)PR	3	0.26729
AT5G13010.1	307	S	18.8358	19.3292	19.1548	21.4648	19.454	18.9491	18.0917	20.6554	-0.4086	0.502343	0.164009	AT5G13010.1	307	401190	1255500	548210	0	1828500	791080	297430	0	0.84738	8.58481	0.00249051	40.404	24.638	40.404	1	EGDLT(0.035)NEGHS(0.847)DEDRS(0.117)QGAEEFK	EGDLT(-14)NEGHS(8.6)DEDRS(-8.6)QGAEEFK	3	0.44796
AT5G13020.1	136	S	18.7832	17.9058	18.7304	18.4377	18.9985	19.1572	19.571	19.8209	0.922625	0.00336751	2.11218	AT5G13020.1;AT5G13020.3;AT5G13020.2	136;136;136	0	0	408480	323990	1333400	913810	0	0	0.937529	15.086	2.1518e-05	56.46	49.532	44.05	1	ANS(0.001)LQS(0.003)S(0.003)VPQLVHDAPS(0.938)PAVS(0.027)GS(0.029)R	ANS(-29)LQS(-25)S(-25)VPQLVHDAPS(15)PAVS(-15)GS(-15)R	3	-0.084766
AT5G13020.1	390	S	16.2242	15.218	16.204	16.0276	13.8502	12.6809	14.0321	11.8013	-2.82733	2.87442	0.00058017	AT5G13020.1	390	0	72645	0	60953	0	0	0	0	0.854716	7.69605	0.0015482	46.844	34.618	46.844	1	LEEIS(0.855)DGES(0.145)GNI	LEEIS(7.7)DGES(-7.7)GNI	2	0.064949
AT5G13160.1	405	S	17.4436	17.038	16.8316	16.9018	16.1852	16.4175	16.2792	16.4657	-0.71685	2.79837	0.000691513	AT5G13160.1	405	152850	256500	109540	111730	189710	136810	84676	69352	1	46.1582	0.00203181	46.158	31.951	46.158	1	FDLEGS(1)EK	FDLEGS(46)EK	2	0.24131
AT5G13160.1	21	S	17.1887	16.6273	15.9535	16.6195	17.3507	15.1673	16.0342	17.1938	-0.16075	0.404134	0.217768	AT5G13160.1	21	0	192950	59599	0	425520	57516	71451	0	1	61.1103	0.000305104	61.11	42.974	61.11	1	LNPVDES(1)NHGQK	LNPVDES(61)NHGQK	2	0.25886
AT5G13200.2	33	S	16.761	16.3139	15.9869	16.2479	15.1609	16.1991	16.6785	16.3495	-0.230425	0.55976	0.140007	AT5G13200.2;AT5G13200.1	33;33	95232	155280	60998	71010	0	117590	111680	63986	0.764478	9.8853	2.52094e-05	76.85	60.544	76.85	1	TLETEHQPEPS(0.078)S(0.078)S(0.078)S(0.764)PDQK	T(-55)LET(-43)EHQPEPS(-9.9)S(-9.9)S(-9.9)S(9.9)PDQK	2	0.72865
AT5G13240.1	66	S	17.6957	18.4722	17.1233	16.6709	12.3467	12.6995	14.0058	18.1381	-3.193	1.51855	0.0133631	AT5G13240.1;AT5G13240.2;AT5G13240.3	66;66;86	0	693130	134090	95206	0	0	0	221060	0.886914	9.05591	3.08513e-06	90.367	75.947	90.367	1	SSDTDS(0.002)S(0.11)S(0.887)PVDLLLSR	S(-37)S(-37)DT(-37)DS(-26)S(-9.1)S(9.1)PVDLLLS(-51)R	2	-0.13446
AT5G13530.2	973	S	19.7803	18.6009	18.6991	18.8417	18.9973	18.2923	18.5679	19.0189	-0.2614	0.648119	0.110611	AT5G13530.2;AT5G13530.1	973;974	772070	757810	399730	428690	1332300	501750	413750	407060	1	45.368	0.00229891	45.368	30.745	45.368	1	VGFPGAS(1)R	VGFPGAS(45)R	2	0.070224
AT5G13560.1	585	S	21.6252	20.2628	19.5362	20.9223	19.7524	19.9566	21.1385	20.2677	-0.307825	0.529865	0.151942	AT5G13560.1	585	0	2398000	714070	1813300	2248600	1590400	2457900	967360	1	150.517	5.84062e-65	172.99	157.73	172.99	1	PTLEIEIPS(1)PR	PT(-150)LEIEIPS(150)PR	2	1.0699
AT5G13850.1	36	S	16.213	19.3494	18.7672	18.0115	19.7529	23.2043	17.8231	19.1415	1.89517	0.0470715	0.988349	AT5G13850.1	36	65133	1273200	419030	0	2249400	0	0	443160	1	51.5663	1.68126e-52	147.16	141.95	51.566	1	IDLDKPEVEDDDDNDEDDS(1)EDDDEAEGHDGEAGGR	IDLDKPEVEDDDDNDEDDS(52)EDDDEAEGHDGEAGGR	4	-2.1358
AT5G14120.1	301	S	20.0167	22.2781	19.5745	21.6877	22.7031	22.3837	22.5299	21.3884	1.36203	0.0233438	1.28124	AT5G14120.1	301	909540	9694200	733290	3082200	17384000	8553100	6447700	2103500	1	89.1488	2.35758e-81	183.44	166.78	89.149	1;2	REDQEPGLQT(1)PDLILS(1)EVEDEKPK	REDQEPGLQT(89)PDLILS(89)EVEDEKPK	3	-0.33118
AT5G14200.2	74	S	17.2592	20.0379	13.4291	18.5906	19.2304	19.0647	20.6469	18.6693	2.07362	0.0485173	0.975921	AT5G14200.2;AT5G14200.3;AT5G14200.1	74;74;74	134510	2051900	0	0	1565900	0	0	319460	1	45.9965	0.000210042	65.347	53.857	45.997	1	AGS(1)LEGLEFDFK	AGS(46)LEGLEFDFK	2	-0.83902
AT5G14270.3	478	S	20.3028	19.7972	19.6654	15.5427	18.2791	18.9146	19.5147	19.8982	0.324625	0.217806	0.404076	AT5G14270.3;AT5G14270.1	478;478	0	1736500	780960	43555	0	0	797520	748770	0.992993	21.514	1.65362e-05	79.013	62.79	79.013	1	GSSVGGLDQLES(0.007)AS(0.993)PEK	GS(-68)S(-68)VGGLDQLES(-22)AS(22)PEK	2	-1.5178
AT5G14540.1	104	S	19.8181	18.6044	19.5181	19.4745	20.1335	20.0953	19.6678	19.8578	0.584825	0.0186998	1.37526	AT5G14540.1	104	792580	0	705160	664680	2928400	1750900	886800	728070	0.999693	37.4803	6.04931e-20	126.83	101.4	125.82	1	SYGS(1)MDSLEPSK	S(-39)Y(-66)GS(37)MDS(-37)LEPS(-86)K	2	0.29873
AT5G14720.2	333	S	17.3211	19.817	20.2164	20.5013	21.1682	21.1792	20.8351	20.4273	1.4385	0.0230227	1.28709	AT5G14720.2;AT5G14720.1	333;333	140400	1760500	1144200	1354300	5999600	3711500	1991700	1080500	1	79.6329	1.20266e-38	150.21	115.53	79.633	1	GIS(1)AWNFNLEDLK	GIS(80)AWNFNLEDLK	2	0.18165
AT5G14720.2	515	S	20.6748	19.6822	20.6514	19.5604	20.0179	13.2384	14.5323	15.0486	-4.4329	1.87779	0.00579286	AT5G14720.2;AT5G14720.1	515;515	1435300	1603500	0	705490	2702900	0	0	0	0.99044	20.1736	4.17422e-09	110.88	78.922	110.88	1	SYS(0.99)GS(0.01)LYR	S(-46)Y(-47)S(20)GS(-20)LY(-84)R	2	0.33136
AT5G14720.2	549	S	15.9793	17.447	17.0458	16.7716	18.2367	16.3114	16.6891	16.8307	0.20605	0.189498	0.451489	AT5G14720.2;AT5G14720.1	549;549	0	340570	127080	102090	786400	127110	112500	89317	0.999908	40.3804	1.94707e-09	110.93	49.339	110.93	1	VTSADLS(1)PK	VT(-75)S(-40)ADLS(40)PK	2	0.26642
AT5G14740.9	43	S	20.3892	20.5218	20.8679	21.1682	20.2449	11.941	14.0953	14.1978	-5.61702	1.9931	0.004435	AT5G14740.9;AT5G14740.8;AT5G14740.7;AT5G14740.6;AT5G14740.2;AT5G14740.1;AT5G14740.5;AT5G14740.4;AT5G14740.3	43;43;43;43;43;115;115;115;115	1177500	2869600	1797300	0	3163600	0	0	0	0.788996	7.14639	6.43475e-109	209.39	187.16	209.39	1	ITAELQAAS(0.029)S(0.789)S(0.152)DS(0.029)K	IT(-200)AELQAAS(-14)S(7.1)S(-7.1)DS(-14)K	2	0.41866
AT5G14740.9	193	S	20.4672	17.3935	17.6173	17.4212	18.21	18.0703	17.9551	18.1955	-0.117075	0.355905	0.252317	AT5G14740.9;AT5G14740.8;AT5G14740.7;AT5G14740.6;AT5G14740.2;AT5G14740.1;AT5G14740.5;AT5G14740.4;AT5G14740.3	193;193;193;193;193;265;265;265;265	1242900	328170	188850	160150	771970	430210	0	230030	0.890186	9.5562	9.00962e-80	192.51	171.51	113.72	1	VLAES(0.011)ES(0.89)S(0.099)AFEDQCGR	VLAES(-19)ES(9.6)S(-9.6)AFEDQCGR	2	-0.61797
AT5G14740.9	194	S	21.5339	20.465	20.6448	20.3194	20.904	20.5758	20.5094	20.6062	-0.091925	0.420771	0.207269	AT5G14740.9;AT5G14740.8;AT5G14740.7;AT5G14740.6;AT5G14740.2;AT5G14740.1;AT5G14740.5;AT5G14740.4;AT5G14740.3	194;194;194;194;194;266;266;266;266	0	2758800	1539800	1193900	4995600	2442800	1589200	1223100	0.984738	18.0971	2.90729e-246	275.23	250.67	230.97	1	VLAESES(0.015)S(0.985)AFEDQCGR	VLAES(-73)ES(-18)S(18)AFEDQCGR	2	-0.46769
AT5G14880.1	637	S	19.1464	17.4186	17.0111	17.5399	17.3329	17.3423	17.6323	17.0832	-0.431325	0.692388	0.0985711	AT5G14880.1	637	0	333940	124060	0	420320	259730	0	106400	0.958993	13.7949	0.00120901	45.434	34.949	45.434	1	PLNY(0.04)S(0.959)PDPENES(0.001)GINER	PLNY(-14)S(14)PDPENES(-30)GINER	2	2.1705
AT5G15020.2	1023	S	17.9939	18.7737	18.8078	18.5674	18.4258	18.6281	18.3665	18.6509	-0.017875	0.33154	0.272523	AT5G15020.2;AT5G15020.1	1023;1023	223830	854260	431000	354460	896550	633260	359840	315410	1	78.0527	3.39341e-21	126.88	110.48	123.97	1	AES(1)EGEAEGMESHLIEDK	AES(78)EGEAEGMES(-78)HLIEDK	2	0.16656
AT5G15020.2	939	S	17.526	17.0064	17.261	17.3514	16.7976	16.36	17.0896	16.4562	-0.61035	1.95905	0.00479888	AT5G15020.2;AT5G15020.1	939;939	0	250950	147520	152580	0	0	148500	68898	0.991822	20.9267	0.000728358	49.224	31.942	49.224	1	EEGELS(0.992)PVGDS(0.008)EDNFVVYEDR	EEGELS(21)PVGDS(-21)EDNFVVY(-38)EDR	2	-0.42878
AT5G15020.2	416	S	17.4535	17.0996	17.0457	16.7085	14.4788	16.5339	16.741	16.657	-0.97415	1.17118	0.0303162	AT5G15020.2;AT5G15020.1	416;416	153900	267680	127070	97718	0	148310	116620	79185	0.992898	21.8525	0.00141784	46.706	26.944	46.706	1	S(0.001)LGS(0.993)EENLS(0.006)R	S(-32)LGS(22)EENLS(-22)R	2	-0.77295
AT5G15025.1	22	S	16.9869	17.1824	18.5938	16.2819	17.1724	16.1802	19.2892	18.7048	0.5754	0.133159	0.578294	AT5G15025.1	22	111370	283510	0	72705	376050	116060	0	0	0.99978	39.5756	0.000209729	62.378	46.489	62.378	1	EIDGSGSQNQHPVGS(1)PR	EIDGS(-40)GS(-40)QNQHPVGS(40)PR	2	1.0159
AT5G15680.1	1478	S	14.6266	20.0587	16.7657	19.2863	21.4234	20.3499	19.4629	19.0683	2.3918	0.0281362	1.20251	AT5G15680.1	1478	21689	2081600	104650	583410	7160100	2088800	769420	421240	0.999999	59.4344	2.71253e-06	89.982	79.93	73.464	1	S(1)GQLLPSLVNASGPLMGVR	S(59)GQLLPS(-59)LVNAS(-72)GPLMGVR	2	0.89448
AT5G15680.1	2080	S	21.7865	21.6516	21.5957	21.3305	21.39	21.6176	21.2614	21.211	-0.221075	1.14079	0.0325981	AT5G15680.1	2080	3101700	6279200	2976600	2406200	6996600	5029400	2676500	1860100	0.915847	10.3675	5.60201e-06	94.616	67.287	77.288	1	TLVPQT(0.084)S(0.916)FK	T(-64)LVPQT(-10)S(10)FK	2	-0.13915
AT5G15680.1	1075	S	18.6371	18.4779	18.3457	18.2597	18.8283	19.0041	18.5441	19.8442	0.625075	0.0167464	1.42221	AT5G15680.1	1075	349580	695870	312880	286370	1185000	821820	406960	0	0.993925	22.1381	9.86012e-05	67.726	41.053	55.401	1	VPFGY(0.006)S(0.994)PADPR	VPFGY(-22)S(22)PADPR	2	-0.33996
AT5G16260.1	156	S	18.6074	18.927	18.7559	18.4295	19.1295	18.4898	18.5968	18.1411	-0.09065	0.451165	0.189675	AT5G16260.1	156	342440	950030	415770	322140	1460200	575360	422120	221510	0.771881	5.29389	4.83504e-22	124.92	116.19	90.714	1	AS(0.228)S(0.772)PPEGEDEFTDDDGTK	AS(-5.3)S(5.3)PPEGEDEFT(-70)DDDGT(-87)K	2	-0.23083
AT5G16270.1	189	S	17.2674	21.1914	20.2403	19.5263	22.2905	21.9559	21.5614	19.6949	1.81932	0.027768	1.20805	AT5G16270.1	189	135270	4564400	1163300	688990	13060000	6358600	3295000	650340	1	73.4778	4.44459e-13	92.865	86.071	92.865	1	DVIGS(1)DDEGVPGIDHNAYLDAAAPGIK	DVIGS(73)DDEGVPGIDHNAY(-73)LDAAAPGIK	3	-0.92615
AT5G16680.2	415	S	17.2034	15.6039	17.1977	17.7715	15.8203	16.7457	17.366	17.066	-0.194625	0.428171	0.202804	AT5G16680.2;AT5G16680.1	415;415	129400	0	0	204160	0	171760	179860	105140	0.85743	8.43172	0.000222271	57.136	31.012	57.136	1	LNHQT(0.123)S(0.857)FS(0.019)DDT(0.001)ESAR	LNHQT(-8.4)S(8.4)FS(-17)DDT(-32)ES(-38)AR	2	0.47958
AT5G16730.1	679	S	17.0596	16.8767	16.933	16.1683	17.3382	16.0928	16.3891	16.8217	-0.09895	0.409449	0.214342	AT5G16730.1	679	117130	229370	117520	67198	421870	109240	91381	88759	0.978175	16.5146	0.000363148	62.378	55.995	62.378	1	KQPEEENGELS(0.978)ES(0.022)EK	KQPEEENGELS(17)ES(-17)EK	2	0.21613
AT5G16730.1	344	S	13.5383	14.064	11.7115	11.5429	16.6658	17.7848	17.6266	18.4398	4.91508	0.000118144	3.56601	AT5G16730.1	344	0	0	0	0	0	352970	215460	272470	0.967948	15.5376	0.0038649	56.087	45.898	51.841	1	S(0.027)AS(0.968)VS(0.005)LESVMK	S(-16)AS(16)VS(-23)LES(-37)VMK	2	0.51979
AT5G16780.3	22	S	17.7585	15.8849	17.4998	16.4833	16.788	12.6671	15.3996	13.7343	-2.25937	1.47948	0.0146418	AT5G16780.3;AT5G16780.2;AT5G16780.1	22;22;22	190130	115340	0	0	288090	0	0	0	0.999991	50.6256	7.6254e-09	103.34	83.06	103.34	1	ADYEGS(1)PVR	ADY(-51)EGS(51)PVR	2	0.18365
AT5G16840.3	247	S	19.3261	19.0224	19.4217	18.7124	12.5472	14.5239	13.2065	13.5606	-5.6611	5.15523	3.04007e-06	AT5G16840.3;AT5G16840.1;AT5G16840.2	247;249;250	0	0	659610	391920	0	0	0	0	0.853497	9.66696	2.29904e-11	79.515	69.093	75.248	1	VEAEQPS(0.001)QPAQS(0.041)QQQLPEGY(0.092)S(0.853)PIHS(0.008)S(0.002)EYS(0.002)K	VEAEQPS(-30)QPAQS(-13)QQQLPEGY(-9.7)S(9.7)PIHS(-20)S(-27)EY(-37)S(-27)K	3	0.038497
AT5G16880.4	35	S	20.1115	20.2621	20.4361	20.5029	20.8379	20.291	20.6814	20.3811	0.2197	0.0473838	0.985631	AT5G16880.4;AT5G16880.2;AT5G16880.1;AT5G16880.3	35;35;35;35	971340	2396800	1332400	1355800	4771700	2005300	1790400	1046400	0.995419	24.0477	3.76181e-40	148.96	75.459	83.617	1	ISAGVS(0.001)S(0.004)MS(0.995)FK	IS(-73)AGVS(-32)S(-24)MS(24)FK	2	-0.39507
AT5G16880.4	337	S	21.1343	22.0191	21.8408	21.4407	21.9799	22.0522	21.5589	21.6879	0.211	0.0959215	0.702947	AT5G16880.4;AT5G16880.2;AT5G16880.1	337;337;337	1973600	8101400	3527700	2597200	10531000	6797400	3289300	2588800	1	132.391	1.02861e-51	153.77	138.84	149.54	1	PSAPLTSHEPAMIPVAEEPDDS(1)PIHGR	PS(-140)APLT(-130)S(-130)HEPAMIPVAEEPDDS(130)PIHGR	3	-0.19775
AT5G17010.4	26	S	20.7975	21.0671	20.4213	19.9937	20.9295	21.0605	19.855	19.9629	-0.117925	0.412337	0.212509	AT5G17010.4;AT5G17010.3;AT5G17010.1	26;26;26	1562700	4187500	1318800	952610	5084600	3418200	1009700	783100	1	67.4782	9.73229e-63	178.03	148.05	178.03	1	SSGEIS(1)PEREPLIK	S(-67)S(-67)GEIS(67)PEREPLIK	2	0.8839
AT5G17330.1	8	S	20.7425	20.0519	20.8407	20.7928	14.0854	15.1661	11.2493	15.562	-6.59127	3.55402	0.000121185	AT5G17330.1	8	1504300	2071800	0	0	0	0	0	0	0.820901	7.61986	5.99209e-05	69.72	64.292	50.426	1	VLS(0.024)HAVS(0.821)ES(0.142)DVS(0.013)VHSTFASR	VLS(-15)HAVS(7.6)ES(-7.6)DVS(-18)VHS(-37)T(-41)FAS(-41)R	3	-0.34773
AT5G17523.1	76	S	19.7787	20.1215	20.8971	20.1416	12.6158	20.0494	13.6625	15.152	-4.8648	1.88045	0.00575722	AT5G17523.1;AT5G17520.1	76;76	771250	2174300	0	0	0	1696100	0	0	0.85637	8.03718	2.77133e-15	111.2	98.411	111.2	1	SINS(0.006)ES(0.856)DS(0.135)DS(0.003)DFPHENQQGNPGLGK	S(-52)INS(-21)ES(8)DS(-8)DS(-25)DFPHENQQGNPGLGK	3	0.92307
AT5G18230.3	50	S	16.9331	15.835	16.7383	15.9357	16.5138	17.6085	17.112	17.4102	0.8006	0.0158216	1.44642	AT5G18230.3;AT5G18230.1;AT5G18230.2;AT5G18230.4	50;77;79;77	0	0	102680	57193	0	312350	0	133470	0.896987	9.78373	0.000179951	70.412	55.44	70.412	1	VS(0.897)AS(0.094)Y(0.009)EQSLVDAR	VS(9.8)AS(-9.8)Y(-20)EQS(-46)LVDAR	2	1.2077
AT5G18570.1	189	S	16.7237	16.417	18.0222	17.7353	17.2775	17.2927	18.7803	18.4489	0.7253	0.054272	0.930062	AT5G18570.1	189	92798	0	250030	199100	0	0	479380	274190	1	76.8502	1.18477e-22	130.56	120.07	76.85	1	DGEVLCFS(1)GEEEEDEIGVK	DGEVLCFS(77)GEEEEDEIGVK	2	-0.55955
AT5G18590.2	446	S	17.8721	18.0645	18.134	18.0837	17.1793	18.3993	18.2398	18.2313	-0.02615	0.332463	0.271719	AT5G18590.2;AT5G18590.1	446;446	0	522510	270180	253480	0	540410	329570	235800	0.991242	20.5377	1.0544e-06	89.548	72.522	89.548	1	S(0.991)LS(0.009)EIAFGDHR	S(21)LS(-21)EIAFGDHR	2	-0.062233
AT5G18590.2	448	S	14.1664	18.0645	13.7381	12.353	18.2062	18.3993	19.6083	19.867	4.4397	0.00304026	2.15638	AT5G18590.2;AT5G18590.1	448;448	0	522510	0	0	769950	540410	0	0	0.852476	7.61821	7.69797e-06	79.693	63.803	56.359	1	S(0.148)LS(0.852)EIAFGDHR	S(-7.6)LS(7.6)EIAFGDHR	2	-0.014452
AT5G18590.2	126	S	18.6684	18.9056	19.0346	18.998	19.4876	19.4712	19.1971	18.7703	0.3299	0.0286518	1.19488	AT5G18590.2;AT5G18590.1	126;126	0	936050	0	477730	1871600	1136000	639940	342610	0.993526	22.3376	3.22893e-06	99.531	84.836	70.963	1	VYLS(0.994)PS(0.006)S(0.001)LPLMIPAWK	VY(-39)LS(22)PS(-22)S(-33)LPLMIPAWK	2	0.21165
AT5G18760.2	167	S	16.1772	15.6771	16.7398	15.5103	15.8715	14.5289	14.3538	12.8045	-1.63642	1.56547	0.0119755	AT5G18760.2;AT5G18760.1	167;167	63537	99867	0	0	152630	0	0	0	1	45.161	0.00240065	45.161	37.49	45.161	1	AVS(1)FDDNK	AVS(45)FDDNK	2	0.50598
AT5G18760.2	114	S	17.0435	17.3394	14.3305	15.6239	17.0239	16.5769	18.5475	17.293	1.276	0.0379647	1.07725	AT5G18760.2;AT5G18760.1	114;114	115830	316100	0	46078	339280	152800	0	0	0.99207	25.7439	0.00428053	41.283	19.135	41.283	1	CLS(0.992)LPS(0.003)S(0.003)NS(0.003)AK	CLS(26)LPS(-26)S(-26)NS(-26)AK	2	0.34333
AT5G19050.1	58	S	19.4195	19.5339	19.2384	20.3056	19.524	12.7047	13.1897	12.3922	-5.1717	1.92981	0.00513493	AT5G19050.1	58	0	1446900	580900	0	1919300	0	0	0	0.95526	16.3046	1.38071e-10	104.44	96.213	104.44	1	S(0.022)S(0.022)S(0.955)MAGGGSGSGDYGGPIK	S(-16)S(-16)S(16)MAGGGS(-63)GS(-75)GDY(-98)GGPIK	2	-0.092456
AT5G19390.4	447	S	17.0553	16.6623	16.813	17.8215	16.7551	16.639	16.5047	16.6443	-0.45225	1.1681	0.0305394	AT5G19390.4;AT5G19390.3;AT5G19390.2;AT5G19390.1	447;447;447;447	116780	197690	0	0	281610	159520	99005	78490	0.949609	12.7519	0.00125498	47.712	29.4	47.712	1	GFVADDS(0.95)DIES(0.05)PR	GFVADDS(13)DIES(-13)PR	2	-0.71552
AT5G20170.1	348	S	19.4318	19.5935	19.9413	19.6561	19.5145	19.7207	19.8157	19.7743	0.050625	0.18732	0.455499	AT5G20170.1	348	606390	1507900	945570	753860	1906800	1350500	982520	687140	0.999726	38.0133	9.79919e-39	151.78	128.03	151.78	1	SES(1)ATLLIESSGR	S(-39)ES(38)AT(-38)LLIES(-130)S(-130)GR	2	0.86435
AT5G20280.1	700	S	17.4024	18.0368	19.8685	18.7734	20.0126	20.3771	20.3829	20.3457	1.7593	0.00368713	2.07292	AT5G20280.1	700	148540	0	899040	408870	2693100	2128600	1455800	1021100	1	73.0666	1.41605e-16	124.1	73.811	73.067	1	DIQDIS(1)LNLK	DIQDIS(73)LNLK	2	0.24593
AT5G20280.1	121	S	19.3061	19.3428	19.6058	19.4336	19.0727	19.282	19.4702	19.3759	-0.121875	0.820043	0.0712668	AT5G20280.1	121	555790	1267400	749380	646140	1403800	996360	773300	521320	0.999874	39.0162	6.16867e-38	155.98	134.23	155.98	1	EATADMS(1)EEFSEGEK	EAT(-69)ADMS(39)EEFS(-39)EGEK	2	0.25707
AT5G20280.1	125	S	19.8338	20.092	20.3802	20.3266	20.2768	20.5501	20.6976	20.7879	0.41995	0.0101463	1.63654	AT5G20280.1	125	801290	2130200	1281800	1199900	3234200	2399800	1810700	1387300	1	105.808	7.66305e-127	224.33	181.55	224.33	1	EATADMSEEFS(1)EGEK	EAT(-170)ADMS(-110)EEFS(110)EGEK	2	0.094205
AT5G20280.1	684	S	20.1327	20.1598	19.9984	20.129	18.9952	19.0153	18.7706	20.6333	-0.751375	1.17914	0.0297466	AT5G20280.1	684	985710	2232800	983720	1046300	1330400	0	476140	0	0.999929	41.4932	2.83613e-70	177.3	164.05	177.3	1	HPQWQSDDGGDNS(1)EPESPSDSLR	HPQWQS(-41)DDGGDNS(41)EPES(-73)PS(-99)DS(-110)LR	3	0.20499
AT5G20280.1	152	S	21.3905	21.7177	21.888	21.6478	22.1277	21.9518	21.7506	21.9385	0.28115	0.0159049	1.44419	AT5G20280.1	152	2357100	6573900	3645000	2998100	11667000	6340400	3756700	3079800	1	99.6514	1.17731e-246	280.7	239.32	228.8	1	INS(1)AESMELWASQQK	INS(100)AES(-100)MELWAS(-180)QQK	2	-0.12789
AT5G20280.1	155	S	20.0167	19.2778	19.6325	20.3932	19.1664	19.8848	20.4457	20.9016	0.269575	0.144703	0.547651	AT5G20280.1	155	0	1211500	763370	0	0	1513200	0	1501100	0.840558	7.22721	0.00104254	47.09	42.242	47.09	1	INS(0.159)AES(0.841)MELWASQQK	INS(-7.2)AES(7.2)MELWAS(-35)QQK	3	-0.13182
AT5G20490.3	1451	S	19.603	21.9964	21.2729	21.3039	21.5066	21.6354	22.0273	21.2825	0.5689	0.0772834	0.787767	AT5G20490.3;AT5G20490.1;AT5G20490.2	1451;1516;1517	682800	7974900	2379800	2362200	7585300	5091700	4551000	1954600	1	92.402	5.25308e-16	121.21	106.33	121.21	1	ENS(1)GFGFLLTR	ENS(92)GFGFLLT(-92)R	2	-0.048801
AT5G20490.3	1168	S	14.7886	19.8685	20.5367	19.6746	20.02	20.2832	19.8888	19.8924	1.304	0.0870545	0.740793	AT5G20490.3;AT5G20490.1;AT5G20490.2	1168;1233;1234	24267	1824500	1428700	763600	2706900	1994500	1033600	745770	1	66.2196	7.50695e-39	153.39	134.29	152.99	1	GSPQSAGLS(1)FLNR	GS(-120)PQS(-66)AGLS(66)FLNR	2	0.069795
AT5G20490.3	990	S	14.6002	15.8857	18.1003	12.5403	17.9222	15.5334	17.1375	16.8812	1.58695	0.0597017	0.891306	AT5G20490.3;AT5G20490.1;AT5G20490.2	990;1055;1056	0	0	263930	0	632370	0	153510	92500	0.857008	8.41002	0.000149129	65.395	53.812	45.257	1	QQALAIS(0.857)PT(0.124)S(0.019)R	QQALAIS(8.4)PT(-8.4)S(-16)R	2	-0.65051
AT5G20635.1	37	S	13.602	12.7132	14.6299	16.889	15.6024	16.3028	17.0072	17.0983	2.04415	0.0173864	1.40623	AT5G20635.1	37	0	0	0	110740	0	0	140250	107520	0.99999	50.0915	6.26587e-05	71.555	63.042	71.555	1	S(1)PPEYPDLYGK	S(50)PPEY(-50)PDLY(-67)GK	2	-0.4854
AT5G20900.1	97	S	17.9968	17.9258	17.7732	18.0162	16.6702	18.0748	17.6218	17.7517	-0.398375	0.917505	0.0559711	AT5G20900.1	97	224280	474610	210400	241900	0	431530	214740	169110	0.944328	17.3156	9.70556e-05	73.156	53.552	73.156	1	NS(0.001)T(0.018)S(0.018)IS(0.944)PVS(0.018)S(0.003)PALNR	NS(-33)T(-17)S(-17)IS(17)PVS(-17)S(-26)PALNR	2	0.097024
AT5G21160.1	454	S	20.2225	19.9241	20.2947	21.2353	19.5929	20.3656	20.9477	20.3199	-0.112625	0.405561	0.216841	AT5G21160.1;AT5G21160.2;AT5G21160.3	454;454;454	1049000	0	0	2252600	2013200	2111600	2153300	1003000	1	85.8173	7.41566e-108	201.7	187.01	194.34	1	RNVEDLSNDFSNTFLLDEELDLEHRS(1)PR	RNVEDLS(-170)NDFS(-130)NT(-86)FLLDEELDLEHRS(86)PR	4	-0.68889
AT5G21160.1	381	S	19.886	19.489	19.2717	19.2577	19.7336	18.8562	19.0791	20.0863	-0.0373	0.341439	0.264063	AT5G21160.1;AT5G21160.2;AT5G21160.3	381;381;381	830800	1402500	594470	571960	2219500	741760	589660	0	0.99825	27.6036	3.22835e-109	208.68	194.56	124.07	1	S(0.998)IT(0.002)SGDNFGNPSK	S(28)IT(-28)S(-48)GDNFGNPS(-120)K	2	0.75695
AT5G21160.1	378	S	16.9254	16.1501	16.3522	15.3936	16.7704	17.0316	15.5937	15.5104	0.0212	0.287284	0.315226	AT5G21160.1;AT5G21160.2;AT5G21160.3	378;378;378	106720	138610	78573	39278	284610	0	52651	0	1	67.2355	2.45943e-62	172.24	158.33	172.24	1	STSAETIGDGDKDS(1)PK	S(-110)T(-110)S(-92)AET(-67)IGDGDKDS(67)PK	2	0.64353
AT5G21940.1	244	S	19.3983	18.5646	19.2492	18.6711	17.8434	18.3042	18.0107	18.393	-0.832975	2.15184	0.00307218	AT5G21940.1	244	0	738980	585250	380870	598740	505930	281180	0	0.999428	32.42	0.000149003	79.974	63.82	76.228	1	S(0.001)FS(0.999)VADFPR	S(-32)FS(32)VADFPR	2	0.060064
AT5G22030.1	263	S	21.0649	20.5464	20.1814	20.0781	20.3192	20.0795	20.2056	19.9082	-0.339575	0.986207	0.0473175	AT5G22030.1;AT5G22030.2	263;305	1881000	2918800	1116800	1010000	3330700	1731800	1287400	753950	0.999786	39.6969	2.0009e-05	90.05	37.472	90.05	1	SNS(1)LSFLGK	S(-40)NS(40)LS(-40)FLGK	2	-0.08373
AT5G23080.2	3	S	16.8327	17.4974	18.1259	17.4281	17.5433	16.5169	17.4702	17.351	-0.250675	0.595784	0.127051	AT5G23080.2;AT5G23080.1	3;3	100080	352680	268660	160920	486290	0	193330	128100	0.999996	54.5027	8.76721e-05	67.93	54.268	67.93	1	GS(1)DEEDFVFHGTPIER	GS(55)DEEDFVFHGT(-55)PIER	2	-0.61115
AT5G23890.2	264	S	16.5929	17.4785	17.4686	17.19	17.6446	17.6141	17.0188	16.8491	0.09915	0.202325	0.428977	AT5G23890.2;AT5G23890.1	264;388	84753	348080	170350	136430	521690	313570	141380	90463	0.997423	25.8782	2.38683e-06	91.812	75.283	85.42	1	DELNIY(0.003)S(0.997)QDELDDNR	DELNIY(-26)S(26)QDELDDNR	2	-0.38184
AT5G24030.1	601	S	17.325	16.8862	17.8044	17.9883	18.1546	17.3469	17.5494	17.4353	0.120575	0.190102	0.450387	AT5G24030.1	601	140780	0	215000	237270	742880	0	204230	135810	0.996731	25.316	0.000189499	66.262	51.596	41.54	1	NVS(0.997)S(0.003)ENIENYLK	NVS(25)S(-25)ENIENY(-35)LK	2	0.42275
[truncated: 391 more rows]

## Sheet: Sup. Data 1b
Supplementary Data 1b. Re-analysis of heat-treated wheat phosphoproteome data from Cassio.
[truncated: 210 more rows]

## Sheet: Sup. Data 1c
Supplementary Data 1c. Coregulated phosphoproteins between Arabidopsis and wheat.
[truncated: 340 more rows]
