# Supplementary material for: Evolutionary tuning of molecular charge state of UBP24 shapes eukaryotic responses to high temperature
Source: Research Square preprint supplement (doi:10.21203/rs.3.rs-7157930/v1), 2025-11-11
Supplement: Supplementary file 3 [file 81ea8c3392a539ce0f62ba98.xlsx]

## Sheet: Sup. Data 4a
Supplementary Data 4a. UBP24 phosphosites identified by in planta kinase assay (If the phosphosite has no intensity motre than 50% in all groups are filtered out).
Protein	Site	Site of UBP24	Residue	Normalized intensity.HA+GFP-UBP24_group1_rep1	Normalized intensity.HA+GFP-UBP24_group1_rep2	Normalized intensity.HA+GFP-UBP24_group1_rep3	Normalized intensity.HA+GFP-UBP24_group1_rep4	Normalized intensity.HA-OST1+GFP-UBP24_group2_rep1	Normalized intensity.HA-OST1+GFP-UBP24_group2_rep2	Normalized intensity.HA-OST1+GFP-UBP24_group2_rep3	Normalized intensity.HA-OST1+GFP-UBP24_group2_rep4	Normalized intensity.HA-OST1+GFP-UBP24+ABA_group3_rep1	Normalized intensity.HA-OST1+GFP-UBP24+ABA_group3_rep2	Normalized intensity.HA-OST1+GFP-UBP24+ABA_group3_rep3	Normalized intensity.HA-OST1+GFP-UBP24+ABA_group3_rep4	One-way ANOVA p-value	Tukey HSD significant pairs	Raw intensity.HA+GFP-UBP24_group1_rep1	Raw intensity.HA+GFP-UBP24_group1_rep2	Raw intensity.HA+GFP-UBP24_group1_rep3	Raw intensity.HA+GFP-UBP24_group1_rep4	Raw intensity.HA-OST1+GFP-UBP24_group2_rep1	Raw intensity.HA-OST1+GFP-UBP24_group2_rep2	Raw intensity.HA-OST1+GFP-UBP24_group2_rep3	Raw intensity.HA-OST1+GFP-UBP24_group2_rep4	Raw intensity.HA-OST1+GFP-UBP24+ABA_group3_rep1	Raw intensity.HA-OST1+GFP-UBP24+ABA_group3_rep2	Raw intensity.HA-OST1+GFP-UBP24+ABA_group3_rep3	Raw intensity.HA-OST1+GFP-UBP24+ABA_group3_rep4	Localization prob	Score diff	PEP	Score	Delta score	Score for localization	Number of Phospho (STY)	Phospho (STY) Probabilities	Phospho (STY) Score diffs	Charge	Mass error [ppm]
GFP-AtUBP24	409	155	S	NA	1.855	0.588666	0.556333	NA	1.80128	0.888239	0.127673	NA	1.81683	2.52612	0.805647	0.4764		0	4.56456e+08	1.44852e+08	1.36896e+08	0	4.43236e+08	2.18567e+08	3.14161e+07	0	4.47062e+08	6.21595e+08	1.98244e+08	0.85825	8.28362	2.88541e-185	313.29	276.84	161.16	1	AS(0.014)S(0.858)S(0.127)KFQALDNEDFSSDSSSGSIQR	AS(-18)S(8.3)S(-8.3)KFQALDNEDFS(-110)S(-120)DS(-130)S(-130)S(-140)GS(-140)IQR	2	0.87323
GFP-AtUBP24	422	168	S	0.980021	1.82612	0.537667	0.656189	1.96766	1.50158	1.00806	0.000913115	1.15371	1.64614	0.0150675	0.836237	0.919		5.60319e+09	1.04407e+10	3.07406e+09	3.75171e+09	1.125e+10	8.58517e+09	5.76351e+09	5.22066e+06	6.59625e+09	9.41165e+09	8.61472e+07	4.78112e+09	0.97395	16.0929	2.68066e-168	309.83	281.74	181.4	1;2	FQALDNEDFS(0.024)S(0.974)DS(0.023)S(0.861)S(0.115)GS(0.002)IQR	FQALDNEDFS(-16)S(16)DS(-16)S(8.7)S(-8.7)GS(-26)IQR	2	0.072869
GFP-AtUBP24	374	120	S	0.286235	2.59777	0.505917	0.610081	1.37313	1.48326	0.835188	0.273189	NA	1.42481	1.45435	0.320873	0.9915		7.333e+07	6.65517e+08	1.2961e+08	1.56295e+08	3.5178e+08	3.79994e+08	2.13965e+08	6.99878e+07	0	3.6502e+08	3.72586e+08	8.22037e+07	0.998985	30.9456	2.54507e-11	160.81	118.02	121.31	1	EIS(0.001)ES(0.999)NKSLNNGVAVK	EIS(-31)ES(31)NKS(-37)LNNGVAVK	2	0.43472
GFP-AtUBP24	355	101	S	0.428929	3.13467	0.231954	0.204449	0.855128	1.18938	0.540068	0.172984	0.497895	2.57168	2.33094	0.308601	0.6496		3.80461e+09	2.78045e+10	2.05744e+09	1.81346e+09	7.58499e+09	1.05498e+10	4.7904e+09	1.53437e+09	4.41633e+09	2.28108e+10	2.06755e+10	2.73729e+09	1	136.391	3.92267e-14	162.41	121.61	136.39	1	NS(1)LRVPEHVVQNGIIK	NS(140)LRVPEHVVQNGIIK	2	0.4921
GFP-AtUBP24	265	11	S	0.821469	1.84763	0.575935	0.754963	0.554546	0.734217	1.43175	0.6363	0.521225	0.645943	0.950974	0.312944	0.4672		1.00223e+10	2.25421e+10	7.0267e+09	9.21093e+09	6.76574e+09	8.95782e+09	1.74681e+10	7.76318e+09	6.35921e+09	7.88083e+09	1.16024e+10	3.81808e+09	0.999883	39.3395	7.1795e-13	162.26	146.67	110.12	1	KVFVFGS(1)FTEHETR	KVFVFGS(39)FT(-39)EHET(-64)R	3	0.072818
GFP-AtUBP24	739	485	S	NA	2.45267	0.36007	0.187265	0.819406	1.0701	1.71945	0.440084	0.324109	1.12027	1.46596	NA	0.9977		0	2.16546e+08	3.17907e+07	1.65336e+07	7.23455e+07	9.44796e+07	1.51811e+08	3.88551e+07	2.86156e+07	9.89091e+07	1.2943e+08	0	0.994033	23.4431	0.0004319	109	84.222	109	1	SHLVS(0.994)LS(0.004)NES(0.001)LR	S(-60)HLVS(23)LS(-23)NES(-28)LR	2	-0.8075
GFP-AtUBP24	741	487	S	0.746925	2.25704	0.470979	0.525053	1.16033	1.68802	NA	0.0826543	0.95385	1.79481	2.39834	0.428401	0.7576		1.57361e+08	4.7551e+08	9.9225e+07	1.10617e+08	2.44456e+08	3.5563e+08	0	1.74135e+07	2.00955e+08	3.78128e+08	5.05277e+08	9.02548e+07	0.868189	8.57192	0.0005278	106.32	85.453	98.531	1	SHLVS(0.121)LS(0.868)NES(0.011)LR	S(-62)HLVS(-8.6)LS(8.6)NES(-19)LR	2	-0.71887
GFP-AtUBP24	397	143	S	1.84144	1.40457	0.33843	0.415561	1.26508	1.32715	0.504537	0.359567	1.49581	1.69764	1.88561	0.237802	0.6194		7.02913e+09	5.36154e+09	1.29186e+09	1.58628e+09	4.82908e+09	5.066e+09	1.92592e+09	1.37254e+09	5.70983e+09	6.48024e+09	7.19776e+09	9.07738e+08	0.999245	33.2408	4.39947e-87	245.66	232.48	203.77	1;2	TDPIGLDNLSMS(0.999)DGESDPVYK	T(-160)DPIGLDNLS(-35)MS(33)DGES(-33)DPVY(-100)K	2	-0.119
GFP-AtUBP24	614	360	S	1.01682	1.14239	0.944918	0.89587	0.971955	0.872883	0.84239	0.694603	1.40918	1.2011	1.4484	1.18835	0.00117	group1-group3;group2-group3	1.38436e+10	1.55533e+10	1.28647e+10	1.21969e+10	1.32328e+10	1.1884e+10	1.14688e+10	9.45677e+09	1.91855e+10	1.63526e+10	1.97194e+10	1.6179e+10	0.999396	32.1897	1.23767e-17	167.92	144.69	122.84	1	T(0.001)QS(0.999)FVPSELSEIFGGQLK	T(-32)QS(32)FVPS(-62)ELS(-81)EIFGGQLK	2	0.36745
GFP-AtUBP24	449	195	T	0.925741	1.93091	0.630724	0.512627	0.930695	0.840419	0.419976	0.226735	1.24356	1.26469	1.62088	0.536548	0.3044		6.46479e+07	1.34842e+08	4.40458e+07	3.57986e+07	6.49939e+07	5.86895e+07	2.93285e+07	1.58338e+07	8.68426e+07	8.83177e+07	1.13192e+08	3.74692e+07	1	75.2153	9.41e-09	153.7	94.87	153.7	1	VPTESVPPVKDFT(1)PR	VPT(-85)ES(-75)VPPVKDFT(75)PR	2	-0.81369
GFP-AtUBP24	421	167	S	0.149105	2.93183	0.872364	0.0466979	0.62829	1.47009	0.037235	NA	1.78881	0.120116	3.26776	NA	0.6215		3.97624e+07	7.81841e+08	2.32636e+08	1.24531e+07	1.67548e+08	3.92033e+08	9.92957e+06	0	4.77028e+08	3.20318e+07	8.71424e+08	0	0.964521	16.8979	4.23326e-95	256.25	235	66.606	1;2	FQALDNEDFS(0.965)S(0.92)DS(0.079)S(0.027)S(0.009)GS(0.001)IQR	FQALDNEDFS(17)S(12)DS(-12)S(-18)S(-24)GS(-34)IQR	2	0.73651
GFP-AtUBP24	425	171	S	1.14207	1.68827	0.502344	0.667318	0.0772483	0.846538	0.640578	0.214678	1.03007	1.16251	NA	0.657584	0.1826		5.28893e+08	7.81841e+08	2.32636e+08	3.09036e+08	3.57738e+07	3.92033e+08	2.96653e+08	9.94177e+07	4.77028e+08	5.38361e+08	0	3.04528e+08	0.861309	8.73723	2.49167e-169	314.58	277.94	181.4	1;2	FQALDNEDFS(0.024)S(0.974)DS(0.023)S(0.861)S(0.115)GS(0.002)IQR	FQALDNEDFS(-16)S(16)DS(-16)S(8.7)S(-8.7)GS(-26)IQR	2	0.072869

## Sheet: Sup. Data 4b
Supplementary Data 4b. All detected proteins by in planta kinase assay.
Proteins	Fasta headers	Peptides	Razor + unique peptides	Unique peptides	Sequence coverage [%]	Unique + razor sequence coverage [%]	Unique sequence coverage [%]	Score	Raw intensity.HA+GFP-UBP24_group1_rep1	Raw intensity.HA+GFP-UBP24_group1_rep2	Raw intensity.HA+GFP-UBP24_group1_rep3	Raw intensity.HA+GFP-UBP24_group1_rep4	Raw intensity.HA-OST1+GFP-UBP24_group2_rep1	Raw intensity.HA-OST1+GFP-UBP24_group2_rep2	Raw intensity.HA-OST1+GFP-UBP24_group2_rep3	Raw intensity.HA-OST1+GFP-UBP24_group2_rep4	Raw intensity.HA-OST1+GFP-UBP24+ABA_group3_rep1	Raw intensity.HA-OST1+GFP-UBP24+ABA_group3_rep2	Raw intensity.HA-OST1+GFP-UBP24+ABA_group3_rep3	Raw intensity.HA-OST1+GFP-UBP24+ABA_group3_rep4	LFQ intensity.HA+GFP-UBP24_group1_rep1	LFQ intensity.HA+GFP-UBP24_group1_rep2	LFQ intensity.HA+GFP-UBP24_group1_rep3	LFQ intensity.HA+GFP-UBP24_group1_rep4	LFQ intensity.HA-OST1+GFP-UBP24_group2_rep1	LFQ intensity.HA-OST1+GFP-UBP24_group2_rep2	LFQ intensity.HA-OST1+GFP-UBP24_group2_rep3	LFQ intensity.HA-OST1+GFP-UBP24_group2_rep4	LFQ intensity.HA-OST1+GFP-UBP24+ABA_group3_rep1	LFQ intensity.HA-OST1+GFP-UBP24+ABA_group3_rep2	LFQ intensity.HA-OST1+GFP-UBP24+ABA_group3_rep3	LFQ intensity.HA-OST1+GFP-UBP24+ABA_group3_rep4	MS/MS count
3xHA-OST1;tr|A0A1S4BFJ5|A0A1S4BFJ5_TOBAC;tr|A0A1S3XVK4|A0A1S3XVK4_TOBAC;tr|A0A1S4BFC2|A0A1S4BFC2_TOBAC;tr|A0A1S3ZVH6|A0A1S3ZVH6_TOBAC;tr|A0A1S4D097|A0A1S4D097_TOBAC;tr|A0A1S3ZVL4|A0A1S3ZVL4_TOBAC	3xHA-OST1;tr|A0A1S4BFJ5|A0A1S4BFJ5_TOBAC serine/threonine-protein kinase SRK2E-like isoform X1 OS=Nicotiana tabacum OX=4097 GN=LOC107807681 PE=3 SV=1;tr|A0A1S3XVK4|A0A1S3XVK4_TOBAC serine/threonine-protein kinase SRK2E-like OS=Nicotiana tabacum OX=4097 GN=	12	12	12	30.2	30.2	30.2	113.87	6003000	40861000	7795100	3568600	2197400000	3196600000	1634100000	1014300000	2085400000	3005400000	2274500000	1142000000	0	0	9466900	7498500	368870000	471800000	165410000	174650000	387060000	415030000	504680000	209350000	56
GFP-AtUBP24	GFP-AtUBP24	77	77	77	85.7	85.7	85.7	323.31	2404400000000	4154800000000	1622000000000	1697400000000	2939100000000	3435600000000	1924000000000	1065000000000	2533300000000	2994200000000	3948600000000	1276000000000	133510000000	122390000000	122500000000	120800000000	114250000000	97721000000	110850000000	104200000000	87100000000	99134000000	111530000000	113540000000	26796
sp|A0A1S3XQD6|SCI1B_TOBAC;tr|A0A7F0J2T3|A0A7F0J2T3_TOBAC;tr|A0A7F0M921|A0A7F0M921_TOBAC;sp|A0A1S4AX27|SCI1A_TOBAC	sp|A0A1S3XQD6|SCI1B_TOBAC Style cell-cycle inhibitor 1-B OS=Nicotiana tabacum OX=4097 GN=SCI1B PE=2 SV=2;tr|A0A7F0J2T3|A0A7F0J2T3_TOBAC uncharacterized protein PFB0765w-like OS=Nicotiana tabacum OX=4097 GN=LOC107767402 PE=4 SV=1;tr|A0A7F0M921|A0A7F0M921_TO	3	3	3	25.9	25.9	25.9	14.794	198060000	442930000	197060000	170200000	186260000	244150000	235810000	107920000	230200000	192040000	376120000	119210000	129930000	150270000	182850000	163440000	82928000	84107000	111220000	123210000	91241000	70457000	120910000	140450000	31
tr|A0A1S4D5L1|A0A1S4D5L1_TOBAC;sp|A0A1S4A695|PMM_TOBAC	tr|A0A1S4D5L1|A0A1S4D5L1_TOBAC Phosphomannomutase OS=Nicotiana tabacum OX=4097 GN=LOC107826247 PE=3 SV=1;sp|A0A1S4A695|PMM_TOBAC Phosphomannomutase OS=Nicotiana tabacum OX=4097 GN=PMM PE=3 SV=1	1	1	1	5.6	5.6	5.6	3.8323	0	0	0	0	0	0	0	0	35527000	40923000	41019000	0	0	0	0	0	0	0	0	0	0	0	0	0	2
tr|A0A1S3ZDP1|A0A1S3ZDP1_TOBAC;tr|A0A1S3YU06|A0A1S3YU06_TOBAC;tr|A0A1S4CYM9|A0A1S4CYM9_TOBAC;tr|A0A1S4CYM5|A0A1S4CYM5_TOBAC;tr|A0A1S4A2L0|A0A1S4A2L0_TOBAC;tr|A0A1S3ZD49|A0A1S3ZD49_TOBAC;sp|Q9XGH7|PP2A_TOBAC;tr|A0A1S4BXI0|A0A1S4BXI0_TOBAC;tr|A0A1S3YZY5|A0A1S3YZY5_TOBAC;sp|O04860|PP2A5_TOBAC	tr|A0A1S3ZDP1|A0A1S3ZDP1_TOBAC Serine/threonine-protein phosphatase OS=Nicotiana tabacum OX=4097 GN=LOC107785560 PE=3 SV=1;tr|A0A1S3YU06|A0A1S3YU06_TOBAC Serine/threonine-protein phosphatase OS=Nicotiana tabacum OX=4097 GN=LOC107779504 PE=3 SV=1;tr|A0A1S4C	1	1	1	9	9	9	16.79	181770000	226190000	75592000	70903000	104720000	161140000	80117000	55857000	191980000	216830000	170750000	30187000	0	0	0	0	0	0	0	0	0	0	0	0	5
sp|O04977|FENR1_TOBAC	sp|O04977|FENR1_TOBAC Ferredoxin--NADP reductase, leaf-type isozyme, chloroplastic OS=Nicotiana tabacum OX=4097 GN=PETH PE=2 SV=1	5	1	1	18.5	5.2	5.2	16.991	0	0	0	0	0	0	0	108090000	0	0	0	0	0	0	0	0	0	0	0	0	0	0	0	0	2
tr|Q9FES7|Q9FES7_TOBAC;tr|A0A1S3XEV7|A0A1S3XEV7_TOBAC;sp|O22436|CHLI_TOBAC;tr|A0A1S3Z7S1|A0A1S3Z7S1_TOBAC	tr|Q9FES7|Q9FES7_TOBAC Mg-protoporphyrin IX chelatase OS=Nicotiana tabacum OX=4097 GN=Su-s PE=2 SV=1;tr|A0A1S3XEV7|A0A1S3XEV7_TOBAC Mg-protoporphyrin IX chelatase OS=Nicotiana tabacum OX=4097 GN=LOC107764312 PE=3 SV=1;sp|O22436|CHLI_TOBAC Magnesium-chelata	2	2	2	12.5	12.5	12.5	72.14	453550000	295870000	141200000	111280000	122800000	235130000	163460000	133320000	166310000	184700000	277180000	130930000	229310000	129430000	173130000	133440000	73925000	99827000	124120000	153580000	93084000	93631000	99542000	130330000	14
tr|A0A1S3ZD42|A0A1S3ZD42_TOBAC;sp|O24144|CAMT1_TOBAC;tr|A0A1S3ZCS2|A0A1S3ZCS2_TOBAC;sp|O24151|CAMT4_TOBAC;tr|A0A1S3ZQL5|A0A1S3ZQL5_TOBAC;tr|A0A1S3ZQE5|A0A1S3ZQE5_TOBAC;sp|O24150|CAMT3_TOBAC;sp|O24149|CAMT2_TOBAC;tr|J9XVA1|J9XVA1_TOBAC	tr|A0A1S3ZD42|A0A1S3ZD42_TOBAC caffeoyl-CoA O-methyltransferase OS=Nicotiana tabacum OX=4097 GN=LOC107785450 PE=3 SV=1;sp|O24144|CAMT1_TOBAC Caffeoyl-CoA O-methyltransferase 1 OS=Nicotiana tabacum OX=4097 GN=CCOAOMT1 PE=1 SV=1;tr|A0A1S3ZCS2|A0A1S3ZCS2_TOBA	5	5	2	29.3	29.3	14.2	97.065	626670000	900700000	498940000	446860000	1903800000	1172300000	520910000	297460000	858230000	473690000	1040600000	364020000	211620000	197390000	290310000	269960000	424040000	222110000	210020000	312110000	209430000	123580000	206850000	233490000	59
tr|A0A1S3WZS6|A0A1S3WZS6_TOBAC;tr|O49158|O49158_TOBAC;tr|A0A1S4DN74|A0A1S4DN74_TOBAC;tr|B2MUK2|B2MUK2_TOBAC;tr|A0A1S4AN78|A0A1S4AN78_TOBAC;tr|A0A1S3ZAM5|A0A1S3ZAM5_TOBAC;sp|O48929|ETR1_TOBAC	tr|A0A1S3WZS6|A0A1S3WZS6_TOBAC ethylene receptor-like OS=Nicotiana tabacum OX=4097 GN=LOC107759663 PE=3 SV=1;tr|O49158|O49158_TOBAC Ethylene receptor ERS homolog OS=Nicotiana tabacum OX=4097 GN=ERS PE=2 SV=2;tr|A0A1S4DN74|A0A1S4DN74_TOBAC probable ethylene	1	1	1	3.1	3.1	3.1	2.7086	6756800	5454900	0	0	0	2750400	3036000	7302400	6239200	0	7442300	0	0	0	0	0	0	0	0	0	0	0	0	0	1
tr|Q948K4|Q948K4_TOBAC;tr|Q5KTN6|Q5KTN6_TOBAC;sp|O49995|1433B_TOBAC	tr|Q948K4|Q948K4_TOBAC 14-3-3 b-2 protein OS=Nicotiana tabacum OX=4097 GN=D31 PE=2 SV=1;tr|Q5KTN6|Q5KTN6_TOBAC 14-3-3 b-1 protein OS=Nicotiana tabacum OX=4097 GN=14-3-3 b-1 PE=2 SV=1;sp|O49995|1433B_TOBAC 14-3-3-like protein B OS=Nicotiana tabacum OX=4097	5	1	1	21.2	6.7	6.7	3.0624	34571000	137470000	25849000	16753000	32553000	41948000	25684000	14765000	67643000	80434000	70037000	18202000	0	0	0	0	0	0	0	0	0	0	0	0	4
tr|Q75ZE0|Q75ZE0_TOBAC;tr|Q75ZD9|Q75ZD9_TOBAC;tr|A0A1S4DHA0|A0A1S4DHA0_TOBAC;sp|O49997|1433E_TOBAC	tr|Q75ZE0|Q75ZE0_TOBAC 14-3-3 e-1 protein OS=Nicotiana tabacum OX=4097 GN=14-3-3 e-1 PE=2 SV=1;tr|Q75ZD9|Q75ZD9_TOBAC 14-3-3 e-2 protein OS=Nicotiana tabacum OX=4097 GN=14-3-3 e-2 PE=2 SV=1;tr|A0A1S4DHA0|A0A1S4DHA0_TOBAC 14-3-3-like protein E isoform X1 OS	5	2	2	24.2	13.5	13.5	9.7268	99285000	210290000	75395000	0	83768000	198960000	0	146900000	128780000	89955000	91704000	0	54710000	62765000	0	0	43195000	76117000	0	0	0	0	0	0	7
sp|O80360|RK3_TOBAC;tr|A0A1S4D263|A0A1S4D263_TOBAC;tr|A0A1S4ATF8|A0A1S4ATF8_TOBAC	sp|O80360|RK3_TOBAC 50S ribosomal protein L3, chloroplastic (Fragment) OS=Nicotiana tabacum OX=4097 GN=RPL3 PE=2 SV=1;tr|A0A1S4D263|A0A1S4D263_TOBAC 50S ribosomal protein L3, chloroplastic-like OS=Nicotiana tabacum OX=4097 GN=LOC107825047 PE=3 SV=1;tr|A0A1	8	8	8	40.2	40.2	40.2	188.92	1182000000	3583300000	612350000	626070000	1685500000	2505400000	1153600000	772230000	1392100000	1383000000	1315700000	483420000	275800000	355300000	274850000	281200000	302920000	353280000	327150000	394080000	192020000	223900000	189500000	186000000	80
sp|O80361|RK4_TOBAC;tr|A0A1S4CCG1|A0A1S4CCG1_TOBAC;tr|A0A1S4DD77|A0A1S4DD77_TOBAC	sp|O80361|RK4_TOBAC 50S ribosomal protein L4, chloroplastic OS=Nicotiana tabacum OX=4097 GN=RPL4 PE=2 SV=1;tr|A0A1S4CCG1|A0A1S4CCG1_TOBAC 50S ribosomal protein L4, chloroplastic OS=Nicotiana tabacum OX=4097 GN=LOC107817573 PE=3 SV=1;tr|A0A1S4DD77|A0A1S4DD7	5	5	5	24.8	24.8	24.8	26.134	827910000	1593300000	734280000	1709100000	1084800000	1928300000	1411200000	706580000	1312400000	967720000	898500000	405720000	654850000	897410000	782830000	1294800000	659620000	772010000	1380300000	1520200000	579040000	465340000	418350000	539210000	34
tr|A0A1S3XBY2|A0A1S3XBY2_TOBAC;sp|O80362|RK10_TOBAC	tr|A0A1S3XBY2|A0A1S3XBY2_TOBAC 50S ribosomal protein L10, chloroplastic OS=Nicotiana tabacum OX=4097 GN=LOC107763454 PE=3 SV=1;sp|O80362|RK10_TOBAC 50S ribosomal protein L10, chloroplastic OS=Nicotiana tabacum OX=4097 GN=RPL10 PE=2 SV=1	6	1	1	31.3	5.3	5.3	3.6603	28691000	0	22219000	22508000	47194000	72223000	63763000	27686000	48390000	65965000	42711000	0	0	0	0	0	0	0	0	0	0	0	0	0	3
tr|A0A1S4CX32|A0A1S4CX32_TOBAC;tr|A0A1S4BH30|A0A1S4BH30_TOBAC;sp|O82030|HIS8_TOBAC	tr|A0A1S4CX32|A0A1S4CX32_TOBAC Imidazole acetol-phosphate transaminase OS=Nicotiana tabacum OX=4097 GN=LOC107823535 PE=3 SV=1;tr|A0A1S4BH30|A0A1S4BH30_TOBAC Imidazole acetol-phosphate transaminase OS=Nicotiana tabacum OX=4097 GN=LOC107808211 PE=3 SV=1;sp|O	1	1	1	1.9	1.9	1.9	3.5939	28216000	0	15948000	0	18704000	24060000	34536000	9832700	19200000	17938000	25047000	21878000	0	0	0	0	0	0	0	0	0	0	0	0	3
sp|O82161|PHI1_TOBAC;tr|A0A1S4ASN6|A0A1S4ASN6_TOBAC;tr|A0A1S3YSE5|A0A1S3YSE5_TOBAC;tr|A0A1S4DE71|A0A1S4DE71_TOBAC;tr|A0A1S4CUI9|A0A1S4CUI9_TOBAC;tr|A0A1S4AT66|A0A1S4AT66_TOBAC	sp|O82161|PHI1_TOBAC Protein PHOSPHATE-INDUCED 1 OS=Nicotiana tabacum OX=4097 GN=PHI-1 PE=2 SV=1;tr|A0A1S4ASN6|A0A1S4ASN6_TOBAC protein EXORDIUM-like OS=Nicotiana tabacum OX=4097 GN=LOC107800943 PE=3 SV=1;tr|A0A1S3YSE5|A0A1S3YSE5_TOBAC protein EXORDIUM-lik	3	3	3	11.2	11.2	11.2	29.927	175180000	270150000	90150000	92443000	281680000	293090000	133840000	93042000	212760000	415560000	320860000	107800000	0	88895000	98307000	112830000	126910000	105100000	108470000	133230000	110310000	142990000	122800000	121820000	15
sp|P00823|ATPA_TOBAC	sp|P00823|ATPA_TOBAC ATP synthase subunit alpha, chloroplastic OS=Nicotiana tabacum OX=4097 GN=atpA PE=2 SV=2	22	22	1	59	59	2.2	323.31	43054000000	85096000000	28565000000	32872000000	84013000000	104520000000	49934000000	23576000000	75493000000	78801000000	119700000000	31715000000	6921000000	5393100000	7585000000	8635000000	7573100000	8814500000	8037800000	7945000000	7080700000	7141500000	8518100000	7753500000	1136
tr|A0A140G1S1|A0A140G1S1_TOBAC;sp|P00834|ATPE_TOBAC	tr|A0A140G1S1|A0A140G1S1_TOBAC ATP synthase CF1 epsilon subunit OS=Nicotiana tabacum OX=4097 GN=atpE PE=3 SV=1;sp|P00834|ATPE_TOBAC ATP synthase epsilon chain, chloroplastic OS=Nicotiana tabacum OX=4097 GN=atpE PE=3 SV=1	7	7	5	83.5	83.5	75.9	244.35	6569100000	10149000000	4847200000	5288000000	9127700000	16699000000	9341800000	6117700000	12118000000	12367000000	13481000000	6856500000	2533600000	1664800000	2499900000	2776400000	2206800000	2758200000	3102600000	2391100000	2130700000	2404300000	2211100000	3256700000	152
tr|A0A140G1S3|A0A140G1S3_TOBAC;sp|P00876|RBL_TOBAC;tr|A0A1C3HPR1|A0A1C3HPR1_TOBAC;tr|A0A075M4T0|A0A075M4T0_TOBAC;tr|S4X189|S4X189_TOBAC	tr|A0A140G1S3|A0A140G1S3_TOBAC Ribulose bisphosphate carboxylase large chain OS=Nicotiana tabacum OX=4097 GN=rbcL PE=3 SV=1;sp|P00876|RBL_TOBAC Ribulose bisphosphate carboxylase large chain OS=Nicotiana tabacum OX=4097 GN=rbcL PE=1 SV=2;tr|A0A1C3HPR1|A0A1C	29	29	16	65.2	65.2	40.9	323.31	161400000000	198300000000	92745000000	79299000000	198000000000	266690000000	154770000000	126110000000	253680000000	274470000000	251430000000	165670000000	22227000000	17118000000	15306000000	14851000000	18758000000	22440000000	21481000000	30479000000	24782000000	24837000000	23141000000	30451000000	2176
tr|A0A140G1V7|A0A140G1V7_TOBAC;sp|P02376|RR19_TOBAC	tr|A0A140G1V7|A0A140G1V7_TOBAC ribosomal protein S19 OS=Nicotiana tabacum OX=4097 GN=rps19 PE=3 SV=1;sp|P02376|RR19_TOBAC 30S ribosomal protein S19, chloroplastic OS=Nicotiana tabacum OX=4097 GN=rps19 PE=3 SV=3	2	2	2	20.7	20.7	20.7	8.279	125840000	330860000	0	0	342430000	736360000	193390000	79738000	212240000	315150000	270920000	102790000	0	86322000	0	0	0	322390000	105190000	96225000	0	0	0	0	10
tr|A0A140G1U8|A0A140G1U8_TOBAC;sp|P06249|PETD_TOBAC	tr|A0A140G1U8|A0A140G1U8_TOBAC Cytochrome b6-f complex subunit 4 OS=Nicotiana tabacum OX=4097 GN=petD PE=3 SV=1;sp|P06249|PETD_TOBAC Cytochrome b6-f complex subunit 4 OS=Nicotiana tabacum OX=4097 GN=petD PE=3 SV=2	2	2	2	20	20	20	5.6061	185520000	247500000	84902000	73191000	67203000	226020000	84161000	151590000	324830000	226140000	269140000	88351000	0	0	0	0	0	69509000	0	212370000	0	110680000	116290000	0	5
tr|A0A140G1X3|A0A140G1X3_TOBAC;sp|P06252|NDHI_TOBAC	tr|A0A140G1X3|A0A140G1X3_TOBAC NADH-quinone oxidoreductase subunit I OS=Nicotiana tabacum OX=4097 GN=ndhI PE=3 SV=1;sp|P06252|NDHI_TOBAC NAD(P)H-quinone oxidoreductase subunit I, chloroplastic OS=Nicotiana tabacum OX=4097 GN=ndhI PE=1 SV=1	1	1	1	7.2	7.2	7.2	4.0257	65829000	72497000	44042000	38678000	0	67579000	0	28063000	49779000	82612000	103680000	30722000	0	0	0	0	0	0	0	0	0	0	0	0	8
tr|A0A140G1P9|A0A140G1P9_TOBAC;sp|P06286|ATPH_TOBAC	tr|A0A140G1P9|A0A140G1P9_TOBAC ATP synthase subunit C, plastid OS=Nicotiana tabacum OX=4097 GN=atpH PE=3 SV=1;sp|P06286|ATPH_TOBAC ATP synthase subunit c, chloroplastic OS=Nicotiana tabacum OX=4097 GN=atpH PE=3 SV=1	2	2	2	50.6	50.6	50.6	42.355	106110000	206190000	105890000	137460000	70837000	236650000	112150000	214140000	241320000	200410000	183360000	123890000	52445000	38327000	64255000	103870000	17700000	47406000	50747000	178870000	65000000	50083000	59933000	95551000	46
sp|P06290|ATPF_TOBAC;tr|A0A140G1P8|A0A140G1P8_TOBAC;tr|Q36600|Q36600_TOBAC	sp|P06290|ATPF_TOBAC ATP synthase subunit b, chloroplastic OS=Nicotiana tabacum OX=4097 GN=atpF PE=2 SV=3;tr|A0A140G1P8|A0A140G1P8_TOBAC ATP synthase CF0 B subunit OS=Nicotiana tabacum OX=4097 GN=atpF PE=3 SV=1;tr|Q36600|Q36600_TOBAC ATPase subunit I OS=Ni	10	10	10	51.6	51.6	51.6	251.27	1118000000	11054000000	804750000	510750000	2023000000	6179600000	3972400000	361600000	6937600000	3786400000	3962800000	486560000	628100000	1348800000	595440000	473190000	1270000000	1367700000	1173800000	495570000	1484900000	1500800000	1227600000	713740000	98
tr|A0A140G1Q1|A0A140G1Q1_TOBAC;sp|P06355|RR2_TOBAC	tr|A0A140G1Q1|A0A140G1Q1_TOBAC ribosomal protein S2 OS=Nicotiana tabacum OX=4097 GN=rps2 PE=3 SV=1;sp|P06355|RR2_TOBAC 30S ribosomal protein S2, chloroplastic OS=Nicotiana tabacum OX=4097 GN=rps2 PE=3 SV=1	8	8	8	45.3	45.3	45.3	101.82	1864500000	3117900000	682570000	709760000	2985700000	3513300000	1402000000	1313500000	2309600000	2611800000	1133800000	753690000	533160000	306590000	617180000	675510000	521790000	514030000	533870000	552840000	369640000	357880000	339010000	545840000	80
tr|A0A140G1V5|A0A140G1V5_TOBAC;sp|P06357|RR3_TOBAC	tr|A0A140G1V5|A0A140G1V5_TOBAC ribosomal protein S3 OS=Nicotiana tabacum OX=4097 GN=rps3 PE=3 SV=1;sp|P06357|RR3_TOBAC 30S ribosomal protein S3, chloroplastic OS=Nicotiana tabacum OX=4097 GN=rps3 PE=3 SV=1	13	13	13	55.5	55.5	55.5	199.04	3021700000	7475000000	3256100000	2792600000	9396800000	11592000000	3398600000	2459800000	3713600000	5996100000	5915400000	2250100000	1283600000	1523300000	1909800000	1554300000	2075100000	1476500000	1530900000	1526100000	802730000	1056100000	999490000	1205900000	162
tr|A0A140G1R6|A0A140G1R6_TOBAC;sp|P06359|RR4_TOBAC	tr|A0A140G1R6|A0A140G1R6_TOBAC ribosomal protein S4 OS=Nicotiana tabacum OX=4097 GN=rps4 PE=3 SV=1;sp|P06359|RR4_TOBAC 30S ribosomal protein S4, chloroplastic OS=Nicotiana tabacum OX=4097 GN=rps4 PE=3 SV=1	10	10	10	53.7	53.7	53.7	203.05	2895500000	9315100000	2493600000	1953600000	8529100000	10557000000	7401300000	1683300000	5586200000	7032200000	8806900000	1934400000	878660000	1199000000	1223000000	1016500000	1462100000	1453100000	1529800000	867860000	864130000	1155700000	1170700000	857270000	123
tr|A0A140G1V2|A0A140G1V2_TOBAC;sp|P06363|RR8_TOBAC	tr|A0A140G1V2|A0A140G1V2_TOBAC ribosomal protein S8 OS=Nicotiana tabacum OX=4097 GN=rps8 PE=3 SV=1;sp|P06363|RR8_TOBAC 30S ribosomal protein S8, chloroplastic OS=Nicotiana tabacum OX=4097 GN=rps8 PE=3 SV=1	7	7	7	53.7	53.7	53.7	112.32	3363300000	4796800000	2730700000	2093500000	5853700000	5321200000	2598800000	860860000	2607200000	3011300000	4307900000	1820500000	1084500000	748170000	1147100000	1071300000	1238700000	889790000	1532000000	824620000	525910000	688160000	692700000	728900000	96
tr|A0A2H4MYF9|A0A2H4MYF9_TOBAC;tr|A0A140G1R1|A0A140G1R1_TOBAC;sp|P06371|RR14_TOBAC	tr|A0A2H4MYF9|A0A2H4MYF9_TOBAC 30S ribosomal protein S14, chloroplastic OS=Nicotiana tabacum OX=4097 GN=rps14 PE=3 SV=1;tr|A0A140G1R1|A0A140G1R1_TOBAC ribosomal protein S14 OS=Nicotiana tabacum OX=4097 GN=rps14 PE=3 SV=1;sp|P06371|RR14_TOBAC 30S ribosomal	3	3	3	36	36	36	15.557	539620000	837130000	276130000	237130000	599230000	913430000	444480000	248660000	320340000	361310000	560550000	165300000	209460000	238470000	219920000	196980000	179330000	189260000	250370000	158680000	102080000	109350000	152130000	137790000	28
tr|A0A140G1X6|A0A140G1X6_TOBAC;sp|P06373|RR15_TOBAC	tr|A0A140G1X6|A0A140G1X6_TOBAC 30S ribosomal protein S15 OS=Nicotiana tabacum OX=4097 GN=rps15 PE=3 SV=1;sp|P06373|RR15_TOBAC 30S ribosomal protein S15, chloroplastic OS=Nicotiana tabacum OX=4097 GN=rps15 PE=3 SV=1	9	9	9	63.2	63.2	63.2	45.449	826180000	2091800000	800110000	734870000	2213900000	4319600000	1375700000	509380000	1627500000	2345500000	3748300000	639020000	231610000	320130000	277500000	297800000	411620000	536630000	335560000	259920000	252510000	415370000	509350000	268630000	85
tr|A0A140G1P4|A0A140G1P4_TOBAC;sp|P06374|RR16_TOBAC	tr|A0A140G1P4|A0A140G1P4_TOBAC ribosomal protein S16 OS=Nicotiana tabacum OX=4097 GN=rps16 PE=3 SV=1;sp|P06374|RR16_TOBAC 30S ribosomal protein S16, chloroplastic OS=Nicotiana tabacum OX=4097 GN=rps16 PE=3 SV=1	3	3	3	44.7	44.7	44.7	10.343	93828000	499710000	89516000	74219000	402250000	1039900000	405830000	246110000	337150000	342650000	346860000	86384000	0	0	85182000	66734000	142770000	395290000	292970000	275090000	120140000	111900000	0	84011000	26
sp|P06379|RK2_TOBAC;tr|A0A140G1Y4|A0A140G1Y4_TOBAC;tr|Q5MA56|Q5MA56_TOBAC	sp|P06379|RK2_TOBAC 50S ribosomal protein L2, chloroplastic OS=Nicotiana tabacum OX=4097 GN=rpl2-B PE=3 SV=1;tr|A0A140G1Y4|A0A140G1Y4_TOBAC ribosomal protein L2 OS=Nicotiana tabacum OX=4097 GN=rpl2 PE=3 SV=1;tr|Q5MA56|Q5MA56_TOBAC Ribosomal_L2 domain-conta	8	8	8	35.8	35.8	35.8	79.465	1833300000	2607700000	844190000	716650000	1936600000	2664800000	1351200000	732990000	969570000	1181400000	1797600000	443750000	479780000	615400000	418470000	430670000	644490000	664510000	614690000	532630000	282180000	325710000	424570000	288410000	63
tr|A0A140G1V3|A0A140G1V3_TOBAC;sp|P06382|RK14_TOBAC	tr|A0A140G1V3|A0A140G1V3_TOBAC ribosomal protein L14 OS=Nicotiana tabacum OX=4097 GN=rpl14 PE=3 SV=1;sp|P06382|RK14_TOBAC 50S ribosomal protein L14, chloroplastic OS=Nicotiana tabacum OX=4097 GN=rpl14 PE=3 SV=2	3	3	3	37.7	37.7	37.7	26.145	388890000	1610900000	350210000	274620000	1396500000	1247400000	556650000	326290000	810450000	600250000	862410000	220580000	165980000	420550000	269910000	206740000	415450000	244230000	216170000	223830000	238120000	147070000	181650000	143640000	42
tr|A0A140G1V4|A0A140G1V4_TOBAC;sp|P06384|RK16_TOBAC	tr|A0A140G1V4|A0A140G1V4_TOBAC ribosomal protein L16 OS=Nicotiana tabacum OX=4097 GN=rpl16 PE=3 SV=1;sp|P06384|RK16_TOBAC 50S ribosomal protein L16, chloroplastic OS=Nicotiana tabacum OX=4097 GN=rpl16 PE=3 SV=1	4	4	4	42.5	42.5	42.5	29.307	613500000	803660000	451120000	427310000	891380000	1302800000	753120000	407550000	748850000	1084100000	1152200000	372570000	280580000	143980000	215030000	176530000	289510000	299910000	359360000	298740000	179700000	197150000	174340000	191110000	66
tr|A0A140G1U0|A0A140G1U0_TOBAC;sp|P06386|RK20_TOBAC	tr|A0A140G1U0|A0A140G1U0_TOBAC 50S ribosomal protein L20 OS=Nicotiana tabacum OX=4097 GN=rpl20 PE=3 SV=1;sp|P06386|RK20_TOBAC 50S ribosomal protein L20, chloroplastic OS=Nicotiana tabacum OX=4097 GN=rpl20 PE=3 SV=3	2	2	2	14.8	14.8	14.8	10.42	186830000	262940000	127040000	102210000	160280000	191260000	110220000	50945000	170420000	109850000	233890000	73435000	88491000	0	93781000	120270000	0	64414000	68192000	64272000	67696000	0	69112000	68227000	10
tr|A0A140G1V6|A0A140G1V6_TOBAC;sp|P06389|RK22_TOBAC	tr|A0A140G1V6|A0A140G1V6_TOBAC 50S ribosomal protein L22, chloroplastic OS=Nicotiana tabacum OX=4097 GN=rpl22 PE=3 SV=1;sp|P06389|RK22_TOBAC 50S ribosomal protein L22, chloroplastic OS=Nicotiana tabacum OX=4097 GN=rpl22 PE=3 SV=1	1	1	1	9.7	9.7	9.7	53.614	0	0	0	0	70123000	105080000	0	61709000	0	0	49682000	50142000	0	0	0	0	0	0	0	0	0	0	0	0	1
tr|A0A140G1Y3|A0A140G1Y3_TOBAC;sp|P06391|RK23_TOBAC	tr|A0A140G1Y3|A0A140G1Y3_TOBAC ribosomal protein L23 OS=Nicotiana tabacum OX=4097 GN=rpl23 PE=3 SV=1;sp|P06391|RK23_TOBAC 50S ribosomal protein L23, chloroplastic OS=Nicotiana tabacum OX=4097 GN=rpl23-B PE=1 SV=1	2	2	2	23.7	23.7	23.7	4.6604	76680000	89785000	57707000	40927000	152730000	179120000	89500000	31445000	53276000	62232000	27766000	13058000	0	0	0	0	0	0	0	0	0	0	0	0	6
tr|A0A140G1R3|A0A140G1R3_TOBAC;sp|P06405|PSAA_TOBAC	tr|A0A140G1R3|A0A140G1R3_TOBAC Photosystem I P700 chlorophyll a apoprotein A1 OS=Nicotiana tabacum OX=4097 GN=psaA PE=3 SV=1;sp|P06405|PSAA_TOBAC Photosystem I P700 chlorophyll a apoprotein A1 OS=Nicotiana tabacum OX=4097 GN=psaA PE=3 SV=2	11	11	11	21.3	21.3	21.3	94.099	2402800000	6059200000	907490000	885380000	1325700000	4431300000	2065000000	1801800000	3749900000	3120000000	3819600000	1568500000	880990000	1206100000	632600000	621320000	401510000	1093500000	827290000	1135100000	1277800000	822750000	1026900000	1125500000	123
tr|A0A140G1R2|A0A140G1R2_TOBAC;sp|P06407|PSAB_TOBAC;tr|Q15B79|Q15B79_TOBAC	tr|A0A140G1R2|A0A140G1R2_TOBAC Photosystem I P700 chlorophyll a apoprotein A2 OS=Nicotiana tabacum OX=4097 GN=psaB PE=3 SV=1;sp|P06407|PSAB_TOBAC Photosystem I P700 chlorophyll a apoprotein A2 OS=Nicotiana tabacum OX=4097 GN=psaB PE=3 SV=1;tr|Q15B79|Q15B79	11	11	11	21.9	21.9	21.9	227.33	1512100000	4218500000	509510000	549410000	1041700000	3613100000	1332500000	1197800000	4245200000	3325200000	4955900000	1372900000	520060000	500840000	288680000	401590000	214830000	516910000	423470000	816800000	746090000	478550000	672700000	663890000	106
sp|P06409|NDHK_TOBAC;tr|A0A140G1R9|A0A140G1R9_TOBAC;tr|A0A6J3ZY62|A0A6J3ZY62_TOBAC	sp|P06409|NDHK_TOBAC NAD(P)H-quinone oxidoreductase subunit K, chloroplastic OS=Nicotiana tabacum OX=4097 GN=ndhK PE=3 SV=2;tr|A0A140G1R9|A0A140G1R9_TOBAC NADH-quinone oxidoreductase subunit B OS=Nicotiana tabacum OX=4097 GN=ndhK PE=3 SV=1;tr|A0A6J3ZY62|A0	1	1	1	8	8	8	4.0524	71871000	86403000	44681000	67562000	78218000	71702000	42411000	27595000	71417000	50851000	76124000	43116000	0	0	0	0	0	0	0	0	0	0	0	0	8
tr|A0A140G1U3|A0A140G1U3_TOBAC;sp|P06411|PSBB_TOBAC	tr|A0A140G1U3|A0A140G1U3_TOBAC Photosystem II CP47 reaction center protein OS=Nicotiana tabacum OX=4097 GN=psbB PE=3 SV=1;sp|P06411|PSBB_TOBAC Photosystem II CP47 reaction center protein OS=Nicotiana tabacum OX=4097 GN=psbB PE=3 SV=1	12	12	12	28	28	28	263.98	11482000000	22354000000	4753900000	5521200000	6049100000	21195000000	6919900000	9799500000	20840000000	22853000000	23499000000	5890400000	3082100000	2485400000	1852300000	2373100000	953340000	2414500000	1682900000	4673500000	3018500000	2578500000	2632200000	2155700000	362
tr|A0A140G1Q8|A0A140G1Q8_TOBAC;sp|P06413|PSBC_TOBAC	tr|A0A140G1Q8|A0A140G1Q8_TOBAC Photosystem II CP43 reaction center protein OS=Nicotiana tabacum OX=4097 GN=psbC PE=3 SV=1;sp|P06413|PSBC_TOBAC Photosystem II CP43 reaction center protein OS=Nicotiana tabacum OX=4097 GN=psbC PE=3 SV=1	11	11	11	26.5	26.5	26.5	252.11	7481000000	11284000000	2692200000	3190100000	4616500000	10109000000	5343800000	4840900000	12476000000	12708000000	16124000000	3993700000	2045600000	1484000000	1110200000	1482000000	784800000	1353800000	1170100000	2115800000	1880000000	1600500000	1430200000	1406400000	288
tr|A0A140G1S8|A0A140G1S8_TOBAC;sp|P06449|CYF_TOBAC	tr|A0A140G1S8|A0A140G1S8_TOBAC Cytochrome f OS=Nicotiana tabacum OX=4097 GN=petA PE=3 SV=1;sp|P06449|CYF_TOBAC Cytochrome f OS=Nicotiana tabacum OX=4097 GN=petA PE=3 SV=1	1	1	1	5	5	5	2.3589	24429000	0	8464800	9665800	0	7222700	10617000	7210900	29806000	53834000	0	0	0	0	0	0	0	0	0	0	0	0	0	0	1
tr|Q6LBV6|Q6LBV6_TOBAC;tr|Q53WU3|Q53WU3_TOBAC;tr|Q40557|Q40557_TOBAC;tr|A0A1S4BFY9|A0A1S4BFY9_TOBAC;sp|P08299|PR1A_TOBAC;sp|P07053|PR1B_TOBAC;tr|A0A1S4BFU2|A0A1S4BFU2_TOBAC	tr|Q6LBV6|Q6LBV6_TOBAC PR-1b protein (Fragment) OS=Nicotiana tabacum OX=4097 PE=2 SV=1;tr|Q53WU3|Q53WU3_TOBAC Tobacco PR-1a pathogenesis-related protein 1a OS=Nicotiana tabacum OX=4097 PE=4 SV=1;tr|Q40557|Q40557_TOBAC PR1a protein OS=Nicotiana tabacum OX=4	1	1	1	5.5	5.5	5.5	2.3087	14486000	60039000	12336000	10230000	53091000	72637000	17648000	15631000	79750000	160180000	155610000	36459000	0	0	0	0	0	0	0	0	0	0	0	0	5
tr|A0A1S4D7J1|A0A1S4D7J1_TOBAC;sp|P24091|CHI2_TOBAC;tr|A0A1S3WXF3|A0A1S3WXF3_TOBAC;sp|P08252|CHI1_TOBAC	tr|A0A1S4D7J1|A0A1S4D7J1_TOBAC endochitinase B OS=Nicotiana tabacum OX=4097 GN=LOC107826794 PE=3 SV=1;sp|P24091|CHI2_TOBAC Endochitinase B OS=Nicotiana tabacum OX=4097 GN=CHN50 PE=1 SV=1;tr|A0A1S3WXF3|A0A1S3WXF3_TOBAC endochitinase A OS=Nicotiana tabacum O	1	1	1	4.9	4.9	4.9	7.0337	0	0	0	0	0	40135000	0	11766000	23930000	25696000	28527000	0	0	0	0	0	0	0	0	0	0	0	0	0	3
tr|A0A1S4APB5|A0A1S4APB5_TOBAC;tr|C0L093|C0L093_TOBAC;sp|P09114|ILVB2_TOBAC;sp|P09342|ILVB1_TOBAC;tr|A0A1S4C1K3|A0A1S4C1K3_TOBAC	tr|A0A1S4APB5|A0A1S4APB5_TOBAC Acetolactate synthase OS=Nicotiana tabacum OX=4097 GN=LOC107799742 PE=3 SV=1;tr|C0L093|C0L093_TOBAC Acetolactate synthase OS=Nicotiana tabacum OX=4097 PE=3 SV=1;sp|P09114|ILVB2_TOBAC Acetolactate synthase 2, chloroplastic OS=	6	6	6	14.8	14.8	14.8	47.074	745190000	1076800000	435770000	400750000	383140000	567490000	595950000	435870000	853520000	834020000	828550000	464270000	231510000	220590000	352610000	306040000	116140000	161770000	307810000	396940000	237260000	216020000	234370000	333660000	47
tr|A0A140G1Y2|A0A140G1Y2_TOBAC;sp|P09976|YCF2_TOBAC	tr|A0A140G1Y2|A0A140G1Y2_TOBAC Protein Ycf2 OS=Nicotiana tabacum OX=4097 GN=ycf2 PE=3 SV=1;sp|P09976|YCF2_TOBAC Protein Ycf2 OS=Nicotiana tabacum OX=4097 GN=ycf2-B PE=3 SV=2	1	1	1	0.8	0.8	0.8	23.61	18053000	33226000	0	0	23174000	15098000	22472000	21064000	33002000	0	19775000	16177000	0	0	0	0	0	0	0	0	0	0	0	0	6
tr|A0A140G1X5|A0A140G1X5_TOBAC;sp|P12133|NDHH_TOBAC	tr|A0A140G1X5|A0A140G1X5_TOBAC NADH-quinone oxidoreductase subunit D OS=Nicotiana tabacum OX=4097 GN=ndhH PE=3 SV=1;sp|P12133|NDHH_TOBAC NAD(P)H-quinone oxidoreductase subunit H, chloroplastic OS=Nicotiana tabacum OX=4097 GN=ndhH PE=3 SV=1	6	6	6	22.6	22.6	22.6	59.532	331890000	496720000	312150000	243330000	575000000	455640000	261700000	239080000	406680000	493490000	469830000	295910000	161820000	103910000	178510000	183030000	105600000	156960000	146950000	285460000	106890000	104370000	108830000	208300000	38
tr|A0A140G1T7|A0A140G1T7_TOBAC;sp|P12193|PSAJ_TOBAC	tr|A0A140G1T7|A0A140G1T7_TOBAC Photosystem I reaction center subunit IX OS=Nicotiana tabacum OX=4097 GN=psaJ PE=3 SV=1;sp|P12193|PSAJ_TOBAC Photosystem I reaction center subunit IX OS=Nicotiana tabacum OX=4097 GN=psaJ PE=3 SV=1	1	1	1	29.5	29.5	29.5	4.6145	57464000	42110000	20589000	24986000	14993000	48517000	30482000	88620000	86934000	58782000	58337000	34632000	0	0	0	0	0	0	0	0	0	0	0	0	23
sp|P12201|NDHJ_TOBAC;tr|A0A140G1R8|A0A140G1R8_TOBAC;tr|B0FFR6|B0FFR6_TOBAC	sp|P12201|NDHJ_TOBAC NAD(P)H-quinone oxidoreductase subunit J, chloroplastic OS=Nicotiana tabacum OX=4097 GN=ndhJ PE=3 SV=1;tr|A0A140G1R8|A0A140G1R8_TOBAC NADH-quinone oxidoreductase subunit C OS=Nicotiana tabacum OX=4097 GN=ndhJ PE=3 SV=1;tr|B0FFR6|B0FFR6	3	3	3	31	31	31	23.055	116630000	260770000	63057000	61152000	247480000	139630000	144930000	51598000	227640000	242010000	161300000	94600000	67961000	75367000	61706000	62097000	64263000	40779000	65710000	36023000	53918000	56404000	51901000	56361000	16
tr|A0A140G1S6|A0A140G1S6_TOBAC;sp|P12207|YCF4_TOBAC	tr|A0A140G1S6|A0A140G1S6_TOBAC Photosystem I assembly protein Ycf4 OS=Nicotiana tabacum OX=4097 GN=ycf4 PE=3 SV=1;sp|P12207|YCF4_TOBAC Photosystem I assembly protein Ycf4 OS=Nicotiana tabacum OX=4097 GN=ycf4 PE=3 SV=1	1	1	1	4.9	4.9	4.9	18.983	73012000	229890000	49070000	40095000	109730000	163680000	87105000	50399000	110940000	110070000	106600000	52273000	0	0	0	0	0	0	0	0	0	0	0	0	12
tr|A0A140G1U2|A0A140G1U2_TOBAC;sp|P12210|CLPP_TOBAC	tr|A0A140G1U2|A0A140G1U2_TOBAC ATP-dependent Clp protease proteolytic subunit OS=Nicotiana tabacum OX=4097 GN=clpP PE=3 SV=1;sp|P12210|CLPP_TOBAC ATP-dependent Clp protease proteolytic subunit OS=Nicotiana tabacum OX=4097 GN=clpP PE=2 SV=1	4	4	4	28.6	28.6	28.6	195.55	1072300000	1197200000	934990000	996610000	1329100000	1073800000	611100000	372480000	772890000	1254700000	1135500000	450660000	441450000	450610000	542740000	567620000	486970000	318030000	428520000	448160000	316510000	349310000	342370000	375650000	53
tr|A0A140G1S4|A0A140G1S4_TOBAC;sp|P12219|ACCD_TOBAC	tr|A0A140G1S4|A0A140G1S4_TOBAC Acetyl-coenzyme A carboxylase carboxyl transferase subunit beta OS=Nicotiana tabacum OX=4097 GN=accD PE=3 SV=1;sp|P12219|ACCD_TOBAC Acetyl-coenzyme A carboxylase carboxyl transferase subunit beta, chloroplastic OS=Nicotiana t	7	7	7	15.2	15.2	15.2	21.494	441260000	505270000	193740000	186430000	502770000	562340000	308730000	208650000	584200000	376640000	480170000	291860000	156990000	86261000	124340000	140260000	98596000	94157000	91889000	131020000	96343000	98380000	101520000	162970000	41
sp|P17514|CHIQ_TOBAC;tr|A0A1S3Y236|A0A1S3Y236_TOBAC;sp|P17513|CHIP_TOBAC	sp|P17514|CHIQ_TOBAC Acidic endochitinase Q OS=Nicotiana tabacum OX=4097 PE=1 SV=1;tr|A0A1S3Y236|A0A1S3Y236_TOBAC acidic endochitinase P OS=Nicotiana tabacum OX=4097 GN=LOC107771200 PE=4 SV=1;sp|P17513|CHIP_TOBAC Acidic endochitinase P OS=Nicotiana tabacum	2	2	2	15.4	15.4	15.4	47.548	42187000	0	25906000	25098000	30223000	276080000	87301000	78250000	311840000	347010000	300100000	57660000	0	0	0	0	0	97375000	47796000	0	124220000	132490000	101180000	46139000	12
tr|A0A1S4BMY9|A0A1S4BMY9_TOBAC;sp|P18212|PSBP2_TOBAC;tr|Q40458|Q40458_TOBAC;tr|A0A1S4DII2|A0A1S4DII2_TOBAC;sp|Q04127|PSBP3_TOBAC	tr|A0A1S4BMY9|A0A1S4BMY9_TOBAC 23 kDa subunit of oxygen evolving system of photosystem II OS=Nicotiana tabacum OX=4097 GN=LOC107810044 PE=3 SV=1;sp|P18212|PSBP2_TOBAC Oxygen-evolving enhancer protein 2-2, chloroplastic OS=Nicotiana tabacum OX=4097 GN=PSBP2	8	8	8	48.7	48.7	48.7	270.14	4106700000	4843600000	2579500000	2168800000	4275200000	7937400000	3931200000	2488800000	8359000000	7237900000	8142400000	2717800000	1037400000	648980000	1001100000	1025900000	743180000	1104800000	910560000	1019400000	1474600000	1260700000	1157700000	1057000000	157
tr|A0A1S3XCS8|A0A1S3XCS8_TOBAC;sp|P23432|E13C_TOBAC;tr|A0A1S3YM68|A0A1S3YM68_TOBAC;sp|P23433|E13D_TOBAC	tr|A0A1S3XCS8|A0A1S3XCS8_TOBAC glucan endo-1,3-beta-glucosidase OS=Nicotiana tabacum OX=4097 GN=LOC107763655 PE=3 SV=1;sp|P23432|E13C_TOBAC Glucan endo-1,3-beta-glucosidase OS=Nicotiana tabacum OX=4097 GN=SP41A PE=1 SV=1;tr|A0A1S3YM68|A0A1S3YM68_TOBAC gluc	2	2	2	6	6	6	15.855	69457000	474140000	45057000	15299000	19787000	409700000	112260000	119230000	271700000	325450000	257580000	67919000	80029000	140730000	72854000	0	0	136080000	107430000	217770000	150710000	160360000	113580000	111750000	13
sp|P23547|E13G_TOBAC;sp|P52396|E13I_TOBAC;tr|A0A1S3XBH4|A0A1S3XBH4_TOBAC	sp|P23547|E13G_TOBAC Glucan endo-1,3-beta-glucosidase, acidic isoform GI9 OS=Nicotiana tabacum OX=4097 GN=PR2 PE=1 SV=1;sp|P52396|E13I_TOBAC Glucan endo-1,3-beta-glucosidase, acidic isoform PR-N (Fragment) OS=Nicotiana tabacum OX=4097 GN=PRN PE=1 SV=1;tr|A	3	3	3	19.8	19.8	19.8	12.522	87237000	298370000	85872000	65757000	115670000	927140000	207410000	291030000	791730000	764900000	542480000	183130000	49030000	93991000	93971000	68256000	0	248370000	102960000	265320000	260390000	233730000	152530000	123580000	26
tr|A9ZMJ1|A9ZMJ1_TOBAC;tr|A0A1S4A1B2|A0A1S4A1B2_TOBAC;tr|A0A1S3ZH48|A0A1S3ZH48_TOBAC;sp|P45733|PAL3_TOBAC;sp|P35513|PAL2_TOBAC;tr|A0A1S3X5R5|A0A1S3X5R5_TOBAC;sp|P25872|PAL1_TOBAC;tr|A0A1S4CMI5|A0A1S4CMI5_TOBAC;tr|A0A1S4AWI6|A0A1S4AWI6_TOBAC;tr|A0A1S4DM00|A0A1S4DM00_TOBAC;tr|C6ZIA5|C6ZIA5_TOBAC	tr|A9ZMJ1|A9ZMJ1_TOBAC Phenylalanine ammonia-lyase (Fragment) OS=Nicotiana tabacum OX=4097 GN=NtPAL PE=2 SV=1;tr|A0A1S4A1B2|A0A1S4A1B2_TOBAC Phenylalanine ammonia-lyase OS=Nicotiana tabacum OX=4097 GN=LOC107792668 PE=3 SV=1;tr|A0A1S3ZH48|A0A1S3ZH48_TOBAC P	4	4	4	14.1	14.1	14.1	10.106	218270000	180170000	123700000	131870000	274650000	306560000	147230000	65867000	186990000	358840000	362400000	92695000	75213000	106450000	78073000	82504000	76616000	69044000	0	0	65280000	112930000	76248000	73235000	6
sp|P27491|CB27_TOBAC;tr|A0A1S3ZYV8|A0A1S3ZYV8_TOBAC	sp|P27491|CB27_TOBAC Chlorophyll a-b binding protein 7, chloroplastic OS=Nicotiana tabacum OX=4097 GN=CAB7 PE=3 SV=1;tr|A0A1S3ZYV8|A0A1S3ZYV8_TOBAC Chlorophyll a-b binding protein, chloroplastic OS=Nicotiana tabacum OX=4097 GN=LOC107791896 PE=3 SV=1	9	1	1	52.4	13.1	13.1	24.413	3042700000	5142200000	2256300000	320130000	2659700000	3958700000	1655400000	2922600000	4503200000	2009500000	1231800000	1812300000	2345000000	2480600000	2858800000	0	1474400000	1836900000	1378700000	3871900000	2704600000	1161600000	272350000	2263600000	24
sp|P27493|CB22_TOBAC;tr|A0A1S3YD73|A0A1S3YD73_TOBAC;tr|A0A1S4BG25|A0A1S4BG25_TOBAC	sp|P27493|CB22_TOBAC Chlorophyll a-b binding protein 21, chloroplastic OS=Nicotiana tabacum OX=4097 GN=CAB21 PE=2 SV=1;tr|A0A1S3YD73|A0A1S3YD73_TOBAC Chlorophyll a-b binding protein, chloroplastic OS=Nicotiana tabacum OX=4097 GN=LOC107775016 PE=3 SV=1;tr|A	11	3	0	64.9	6.8	0	24.858	1450200000	5246800000	1396100000	1110000000	1970400000	3399100000	1132400000	1985000000	3184800000	8765300000	7959700000	1194300000	576790000	1613400000	1081700000	886600000	580750000	548950000	358370000	1600500000	1287800000	1863300000	1855300000	1057000000	141
tr|A0A3G1CIK9|A0A3G1CIK9_TOBAC;tr|A0A1S3XQ77|A0A1S3XQ77_TOBAC;sp|P29130|PHYB_TOBAC;tr|A0A1S3YRG4|A0A1S3YRG4_TOBAC;tr|A0A1S3YXR1|A0A1S3YXR1_TOBAC;tr|A0A1S3Z2V6|A0A1S3Z2V6_TOBAC	tr|A0A3G1CIK9|A0A3G1CIK9_TOBAC Phytochrome OS=Nicotiana tabacum OX=4097 PE=2 SV=1;tr|A0A1S3XQ77|A0A1S3XQ77_TOBAC Phytochrome OS=Nicotiana tabacum OX=4097 GN=LOC107767359 PE=3 SV=1;sp|P29130|PHYB_TOBAC Phytochrome B OS=Nicotiana tabacum OX=4097 GN=PHYB PE=2	1	1	1	1.2	1.2	1.2	3.0926	0	5205200	0	0	4043000	0	0	0	2709600	5660900	5365500	0	0	0	0	0	0	0	0	0	0	0	0	0	1
sp|P30155|RK27_TOBAC;tr|A0A1S3ZSC3|A0A1S3ZSC3_TOBAC	sp|P30155|RK27_TOBAC 50S ribosomal protein L27, chloroplastic OS=Nicotiana tabacum OX=4097 GN=RPL27 PE=1 SV=1;tr|A0A1S3ZSC3|A0A1S3ZSC3_TOBAC 50S ribosomal protein L27, chloroplastic OS=Nicotiana tabacum OX=4097 GN=LOC107789945 PE=3 SV=1	4	4	4	21.8	21.8	21.8	47.662	442050000	1257100000	417900000	224990000	416470000	598010000	348990000	273070000	629360000	744610000	560760000	305740000	261300000	301540000	348700000	278950000	200560000	186400000	192470000	213110000	153510000	147050000	157040000	138510000	38
tr|A0A1S4B832|A0A1S4B832_TOBAC;tr|A0A1S3XHZ1|A0A1S3XHZ1_TOBAC;sp|Q02585|UCRIB_TOBAC;sp|P30361|UCRIA_TOBAC	tr|A0A1S4B832|A0A1S4B832_TOBAC plastoquinol--plastocyanin reductase OS=Nicotiana tabacum OX=4097 GN=LOC107805497 PE=3 SV=1;tr|A0A1S3XHZ1|A0A1S3XHZ1_TOBAC plastoquinol--plastocyanin reductase OS=Nicotiana tabacum OX=4097 GN=LOC107765416 PE=3 SV=1;sp|Q02585|	5	5	5	36	36	36	64.444	1659200000	3726300000	1419300000	1292700000	1385500000	1824900000	734420000	966040000	2703800000	2696600000	2493800000	910870000	934520000	929410000	1089600000	981040000	471900000	630620000	536240000	1157100000	905980000	842180000	786100000	787270000	49
tr|A0A1S4BC81|A0A1S4BC81_TOBAC;tr|A0A1S3WXY7|A0A1S3WXY7_TOBAC;sp|P30956|RK28_TOBAC	tr|A0A1S4BC81|A0A1S4BC81_TOBAC 50S ribosomal protein L28, chloroplastic OS=Nicotiana tabacum OX=4097 GN=LOC107806723 PE=3 SV=1;tr|A0A1S3WXY7|A0A1S3WXY7_TOBAC 50S ribosomal protein L28, chloroplastic-like OS=Nicotiana tabacum OX=4097 GN=LOC107759172 PE=3 SV	2	2	2	10.6	10.6	10.6	4.5026	38289000	75376000	41096000	40023000	89439000	194720000	109430000	19031000	129250000	125880000	106860000	17243000	0	0	38017000	39013000	38896000	55065000	0	0	0	0	33216000	0	8
sp|P35477|PLAS2_TOBAC;sp|P35476|PLAS1_TOBAC	sp|P35477|PLAS2_TOBAC Plastocyanin B/B OS=Nicotiana tabacum OX=4097 PE=1 SV=1;sp|P35476|PLAS1_TOBAC Plastocyanin A/A OS=Nicotiana tabacum OX=4097 PE=1 SV=1	1	1	1	26.3	26.3	26.3	29.239	0	45696000	0	0	0	141130000	0	0	196260000	197900000	0	0	0	0	0	0	0	0	0	0	0	0	0	0	3
tr|A0A1S4DNF2|A0A1S4DNF2_TOBAC;tr|A0A1S3XWD3|A0A1S3XWD3_TOBAC;sp|P35494|PMGI_TOBAC	tr|A0A1S4DNF2|A0A1S4DNF2_TOBAC phosphoglycerate mutase (2,3-diphosphoglycerate-independent) OS=Nicotiana tabacum OX=4097 GN=LOC107831677 PE=3 SV=1;tr|A0A1S3XWD3|A0A1S3XWD3_TOBAC phosphoglycerate mutase (2,3-diphosphoglycerate-independent) OS=Nicotiana taba	5	5	5	13.4	13.4	13.4	45.877	89522000	293600000	47943000	30351000	77230000	178430000	46583000	24134000	321550000	198910000	421270000	45159000	29003000	36665000	27894000	0	45445000	61523000	0	41500000	78578000	94916000	105990000	28964000	11
tr|A0A1S3ZF75|A0A1S3ZF75_TOBAC;tr|A0A1S3XUR7|A0A1S3XUR7_TOBAC;tr|A0A1S3XBT8|A0A1S3XBT8_TOBAC;sp|P41098|RL34_TOBAC;tr|A0A1S4CM46|A0A1S4CM46_TOBAC;tr|A0A1S4CB80|A0A1S4CB80_TOBAC	tr|A0A1S3ZF75|A0A1S3ZF75_TOBAC 60S ribosomal protein L34-like OS=Nicotiana tabacum OX=4097 GN=LOC107786154 PE=3 SV=1;tr|A0A1S3XUR7|A0A1S3XUR7_TOBAC 60S ribosomal protein L34-like OS=Nicotiana tabacum OX=4097 GN=LOC107768952 PE=3 SV=1;tr|A0A1S3XBT8|A0A1S3XB	3	3	2	27.5	27.5	20.8	17.748	676570000	2598800000	609250000	365040000	1472300000	1876500000	809250000	256720000	1098400000	1461100000	1718100000	416940000	356570000	619160000	496230000	291470000	518630000	425740000	370650000	224250000	316600000	448120000	426590000	331740000	37
tr|A0A1S4DHN3|A0A1S4DHN3_TOBAC;sp|P41918|RANA1_TOBAC;tr|A0A1S3ZIC2|A0A1S3ZIC2_TOBAC;tr|A0A1S3YU28|A0A1S3YU28_TOBAC;sp|P41919|RANB1_TOBAC	tr|A0A1S4DHN3|A0A1S4DHN3_TOBAC GTP-binding nuclear protein OS=Nicotiana tabacum OX=4097 GN=LOC107829920 PE=3 SV=1;sp|P41918|RANA1_TOBAC GTP-binding nuclear protein Ran-A1 OS=Nicotiana tabacum OX=4097 GN=RAN-A1 PE=2 SV=1;tr|A0A1S3ZIC2|A0A1S3ZIC2_TOBAC GTP-b	8	8	8	46.2	46.2	46.2	49.355	883970000	1386200000	465250000	292410000	1919700000	3993400000	1867900000	804180000	1415400000	3434700000	2473600000	1020500000	260270000	229430000	219330000	194050000	355440000	450220000	439540000	389860000	311790000	471720000	292350000	415560000	63
sp|P49627|RL13_TOBAC;tr|A0A1S3XLC6|A0A1S3XLC6_TOBAC;tr|A0A1S3XGB4|A0A1S3XGB4_TOBAC	sp|P49627|RL13_TOBAC 60S ribosomal protein L13 OS=Nicotiana tabacum OX=4097 GN=RPL13 PE=2 SV=1;tr|A0A1S3XLC6|A0A1S3XLC6_TOBAC 60S ribosomal protein L13 OS=Nicotiana tabacum OX=4097 GN=LOC107766512 PE=3 SV=1;tr|A0A1S3XGB4|A0A1S3XGB4_TOBAC 60S ribosomal prot	6	1	1	23.3	3.5	3.5	3.2351	0	24479000	1287400	407930	12467000	0	7160500	49899	0	9622000	0	130700	0	0	0	0	0	0	0	0	0	0	0	0	1
sp|P51134|UCRI4_TOBAC;tr|A0A1S3ZFH0|A0A1S3ZFH0_TOBAC;sp|P51132|UCRI2_TOBAC	sp|P51134|UCRI4_TOBAC Cytochrome b-c1 complex subunit Rieske-4, mitochondrial OS=Nicotiana tabacum OX=4097 PE=2 SV=1;tr|A0A1S3ZFH0|A0A1S3ZFH0_TOBAC Cytochrome b-c1 complex subunit Rieske, mitochondrial OS=Nicotiana tabacum OX=4097 GN=LOC107786155 PE=3 SV=1	1	1	1	7.6	7.6	7.6	6.2454	29739000	248860000	23298000	21819000	67137000	0	127060000	22628000	68880000	92362000	131220000	27087000	0	0	0	0	0	0	0	0	0	0	0	0	1
tr|A0A1S4AM78|A0A1S4AM78_TOBAC;sp|P51135|UCRI5_TOBAC	tr|A0A1S4AM78|A0A1S4AM78_TOBAC Cytochrome b-c1 complex subunit Rieske, mitochondrial OS=Nicotiana tabacum OX=4097 GN=LOC107798995 PE=3 SV=1;sp|P51135|UCRI5_TOBAC Cytochrome b-c1 complex subunit Rieske-5, mitochondrial OS=Nicotiana tabacum OX=4097 PE=2 SV=1	4	4	4	17.2	17.2	17.2	65.579	306770000	396380000	111340000	95021000	436930000	828060000	423920000	119700000	748050000	739340000	664150000	105110000	132960000	121270000	107470000	90127000	166030000	201870000	209490000	74839000	356080000	240390000	182080000	87943000	19
tr|Q5MA10|Q5MA10_TOBAC;sp|P60116|ATP9_TOBAC	tr|Q5MA10|Q5MA10_TOBAC ATP synthase subunit 9, mitochondrial OS=Nicotiana tabacum OX=4097 GN=atp9 PE=3 SV=2;sp|P60116|ATP9_TOBAC ATP synthase subunit 9, mitochondrial OS=Nicotiana tabacum OX=4097 GN=ATP9 PE=2 SV=1	1	1	1	41.9	41.9	41.9	97.232	396470000	480330000	197950000	197500000	158350000	563810000	225550000	322070000	346080000	305150000	558760000	298570000	157090000	88399000	124120000	137940000	64632000	117470000	134320000	374740000	131370000	78699000	110070000	282470000	40
tr|A0A140G1T1|A0A140G1T1_TOBAC;sp|P60139|PSBL_TOBAC	tr|A0A140G1T1|A0A140G1T1_TOBAC Photosystem II reaction center protein L OS=Nicotiana tabacum OX=4097 GN=psbL PE=3 SV=1;sp|P60139|PSBL_TOBAC Photosystem II reaction center protein L OS=Nicotiana tabacum OX=4097 GN=psbL PE=2 SV=1	1	1	1	36.8	36.8	36.8	4.1444	0	0	1264500	145650	11414000	0	0	0	0	0	8482800	0	0	0	0	0	0	0	0	0	0	0	0	0	3
tr|A0A140G1X0|A0A140G1X0_TOBAC;sp|P62094|PSAC_TOBAC	tr|A0A140G1X0|A0A140G1X0_TOBAC Photosystem I iron-sulfur center OS=Nicotiana tabacum OX=4097 GN=psaC PE=3 SV=1;sp|P62094|PSAC_TOBAC Photosystem I iron-sulfur center OS=Nicotiana tabacum OX=4097 GN=psaC PE=1 SV=2	4	4	4	44.4	44.4	44.4	33.323	814380000	3401700000	458670000	429220000	741730000	1104800000	662360000	817900000	3260500000	2936800000	4752900000	728160000	295820000	528640000	234370000	247760000	142940000	300580000	262890000	485240000	590760000	447910000	668800000	338750000	76
tr|A0A140G1V1|A0A140G1V1_TOBAC;sp|P62118|RK36_TOBAC	tr|A0A140G1V1|A0A140G1V1_TOBAC Ribosomal protein OS=Nicotiana tabacum OX=4097 GN=rpl36 PE=3 SV=1;sp|P62118|RK36_TOBAC 50S ribosomal protein L36, chloroplastic OS=Nicotiana tabacum OX=4097 GN=rpl36 PE=3 SV=1	1	1	1	24.3	24.3	24.3	2.8041	39287000	116940000	30490000	18549000	216220000	143330000	45121000	16104000	169220000	179370000	281910000	30636000	0	0	0	0	0	0	0	0	0	0	0	0	3
sp|P62129|RR12_TOBAC;tr|A0A140G1Y5|A0A140G1Y5_TOBAC;tr|A0A6J3ZX44|A0A6J3ZX44_TOBAC	sp|P62129|RR12_TOBAC 30S ribosomal protein S12, chloroplastic OS=Nicotiana tabacum OX=4097 GN=rps12-B PE=1 SV=2;tr|A0A140G1Y5|A0A140G1Y5_TOBAC ribosomal protein S12 OS=Nicotiana tabacum OX=4097 GN=rps12 PE=3 SV=1;tr|A0A6J3ZX44|A0A6J3ZX44_TOBAC Ribosomal pr	3	3	3	35	35	35	78.122	7649100000	4258800000	1830700000	2959000000	7582200000	6695300000	5710800000	2278900000	6609200000	4995500000	4248900000	3119300000	5065400000	2064400000	5652700000	3113300000	3950600000	2639700000	4336400000	2737200000	2781200000	2748900000	2207200000	2791000000	31
tr|A0A140G1W2|A0A140G1W2_TOBAC;sp|P62732|RR7_TOBAC	tr|A0A140G1W2|A0A140G1W2_TOBAC Ribosomal protein S7 OS=Nicotiana tabacum OX=4097 GN=rps7 PE=3 SV=1;sp|P62732|RR7_TOBAC 30S ribosomal protein S7, chloroplastic OS=Nicotiana tabacum OX=4097 GN=rps7-B PE=3 SV=1	6	6	6	35.5	35.5	35.5	29.357	524830000	2185700000	483890000	413480000	1221700000	2257600000	655450000	259910000	973270000	1140900000	1487500000	208240000	150280000	400540000	238410000	252370000	228180000	264290000	207580000	142790000	212490000	220640000	226270000	133920000	56
tr|A0A1S4AQT9|A0A1S4AQT9_TOBAC;sp|P68158|EFTU_TOBAC	tr|A0A1S4AQT9|A0A1S4AQT9_TOBAC Elongation factor Tu OS=Nicotiana tabacum OX=4097 GN=LOC107800308 PE=3 SV=1;sp|P68158|EFTU_TOBAC Elongation factor Tu, chloroplastic OS=Nicotiana tabacum OX=4097 GN=TUFA PE=3 SV=1	15	5	5	49.6	19.5	19.5	323.31	2908300000	2511100000	1401500000	1730200000	3173500000	3222800000	1932400000	1156000000	2854700000	3627600000	5183100000	1992700000	1643900000	700710000	1451900000	1641900000	743500000	1144800000	965990000	2604800000	824390000	1137000000	1051100000	1921200000	61
sp|P69249|RBS_TOBAC;tr|A0A1S4AZ56|A0A1S4AZ56_TOBAC;tr|A0A075M5D0|A0A075M5D0_TOBAC;tr|A0A1S3ZBG0|A0A1S3ZBG0_TOBAC;tr|A0A1S3YBB8|A0A1S3YBB8_TOBAC;tr|A0A1S3YB15|A0A1S3YB15_TOBAC;tr|A0A1S3XJ34|A0A1S3XJ34_TOBAC;tr|A0A1S3ZY67|A0A1S3ZY67_TOBAC;tr|A0A075M9G5|A0A075M9G5_TOBAC;tr|A0A075M9G8|A0A075M9G8_TOBAC;tr|A0A075M9F5|A0A075M9F5_TOBAC;tr|A0A075M5G1|A0A075M5G1_TOBAC;tr|A0A075M554|A0A075M554_TOBAC;tr|A0A0…	sp|P69249|RBS_TOBAC Ribulose bisphosphate carboxylase small subunit, chloroplastic OS=Nicotiana tabacum OX=4097 GN=RBCS PE=1 SV=1;tr|A0A1S4AZ56|A0A1S4AZ56_TOBAC Ribulose bisphosphate carboxylase small subunit, chloroplastic OS=Nicotiana tabacum OX=4097 GN=	10	10	8	53.3	53.3	40.6	323.31	79832000000	88403000000	28930000000	26280000000	54614000000	74469000000	43420000000	26456000000	76492000000	94934000000	92473000000	47421000000	26671000000	15564000000	17458000000	16593000000	13100000000	15652000000	17496000000	27486000000	20097000000	20120000000	17181000000	31238000000	528
tr|A0A140G1Q0|A0A140G1Q0_TOBAC;sp|P69372|ATPI_TOBAC	tr|A0A140G1Q0|A0A140G1Q0_TOBAC ATP synthase CF0 A subunit OS=Nicotiana tabacum OX=4097 GN=atpI PE=3 SV=1;sp|P69372|ATPI_TOBAC ATP synthase subunit a, chloroplastic OS=Nicotiana tabacum OX=4097 GN=atpI PE=3 SV=1	5	5	5	37.2	37.2	37.2	113.91	1728800000	1758900000	1710800000	1311800000	2395500000	1786600000	2563700000	1898100000	1691300000	1281500000	2121700000	1834800000	655250000	353140000	1153300000	976620000	495620000	427400000	1036200000	1458600000	451940000	316030000	440320000	1270000000	85
sp|P69384|PSBE_TOBAC;tr|A0A140G1T3|A0A140G1T3_TOBAC	sp|P69384|PSBE_TOBAC Cytochrome b559 subunit alpha OS=Nicotiana tabacum OX=4097 GN=psbE PE=3 SV=2;tr|A0A140G1T3|A0A140G1T3_TOBAC Cytochrome b559 subunit alpha OS=Nicotiana tabacum OX=4097 GN=psbE PE=3 SV=1	3	3	3	33.7	33.7	33.7	22.986	530290000	984780000	151120000	188190000	56155000	1098200000	270870000	307930000	1394900000	943220000	1362800000	22183000	256770000	217570000	186740000	0	0	486360000	246220000	286840000	662320000	522650000	503570000	0	31
tr|A0A140G1P2|A0A140G1P2_TOBAC;sp|P69556|PSBA_TOBAC	tr|A0A140G1P2|A0A140G1P2_TOBAC Photosystem II protein D1 OS=Nicotiana tabacum OX=4097 GN=psbA PE=3 SV=1;sp|P69556|PSBA_TOBAC Photosystem II protein D1 OS=Nicotiana tabacum OX=4097 GN=psbA PE=3 SV=2	8	8	8	22.7	22.7	22.7	87.094	3486100000	6178800000	1142600000	1474400000	2709000000	6008300000	2579600000	2554300000	7110900000	7317700000	6022400000	1551500000	1852500000	1454100000	932050000	1256500000	983870000	1537900000	1253000000	1695600000	2052600000	2142000000	1482300000	1194800000	113
tr|A0A140G1V0|A0A140G1V0_TOBAC;sp|P69656|RR11_TOBAC	tr|A0A140G1V0|A0A140G1V0_TOBAC ribosomal protein S11 OS=Nicotiana tabacum OX=4097 GN=rps11 PE=3 SV=1;sp|P69656|RR11_TOBAC 30S ribosomal protein S11, chloroplastic OS=Nicotiana tabacum OX=4097 GN=rps11 PE=3 SV=1	4	4	4	27.5	27.5	27.5	36.653	371970000	1482900000	281900000	223950000	547340000	837730000	1826700000	453200000	448990000	390570000	468830000	207770000	275160000	230280000	239650000	262350000	262590000	337350000	592080000	330150000	220480000	164720000	192430000	265810000	41
tr|A0A140G1T9|A0A140G1T9_TOBAC;sp|P69660|RR18_TOBAC	tr|A0A140G1T9|A0A140G1T9_TOBAC ribosomal protein S18 OS=Nicotiana tabacum OX=4097 GN=rps18 PE=3 SV=1;sp|P69660|RR18_TOBAC 30S ribosomal protein S18, chloroplastic OS=Nicotiana tabacum OX=4097 GN=rps18 PE=3 SV=1	3	3	3	21.8	21.8	21.8	16.562	1312000000	1375900000	598310000	717050000	970850000	1146900000	570510000	613010000	774130000	755470000	988900000	473980000	0	1234400000	142530000	0	1052300000	918550000	481540000	82168000	570060000	733690000	787150000	205800000	17
sp|P69686|PSBD_TOBAC;tr|A0A140G1Q7|A0A140G1Q7_TOBAC	sp|P69686|PSBD_TOBAC Photosystem II D2 protein OS=Nicotiana tabacum OX=4097 GN=psbD PE=3 SV=1;tr|A0A140G1Q7|A0A140G1Q7_TOBAC Photosystem II D2 protein OS=Nicotiana tabacum OX=4097 GN=psbD PE=3 SV=1	8	8	8	28.9	28.9	28.9	238.57	7550700000	17182000000	2377400000	2988800000	4774900000	13718000000	5265200000	2605000000	12992000000	16028000000	19585000000	3111300000	5384700000	2316400000	2144300000	3352100000	1407900000	2769800000	2105900000	4327100000	3740300000	3037600000	2618600000	2845800000	142
sp|P83526|FER_TOBAC;tr|A0A1S3YVN4|A0A1S3YVN4_TOBAC	sp|P83526|FER_TOBAC Ferredoxin OS=Nicotiana tabacum OX=4097 PE=1 SV=1;tr|A0A1S3YVN4|A0A1S3YVN4_TOBAC Ferredoxin OS=Nicotiana tabacum OX=4097 GN=LOC107780371 PE=3 SV=1	1	1	1	35.1	35.1	35.1	31.886	0	0	93279000	0	0	469060000	82045000	405810000	377720000	0	0	295340000	0	0	0	0	0	0	0	0	0	0	0	0	3
tr|Q75ZE3|Q75ZE3_TOBAC;tr|Q5KTN5|Q5KTN5_TOBAC;sp|P93343|1433C_TOBAC	tr|Q75ZE3|Q75ZE3_TOBAC 14-3-3 c-2 protein OS=Nicotiana tabacum OX=4097 GN=14-3-3 c-2 PE=2 SV=1;tr|Q5KTN5|Q5KTN5_TOBAC 14-3-3 c-1 protein OS=Nicotiana tabacum OX=4097 GN=14-3-3 c-1 PE=2 SV=1;sp|P93343|1433C_TOBAC 14-3-3-like protein C OS=Nicotiana tabacum O	8	3	3	34.6	16.5	16.5	28.782	66543000	378150000	34291000	33077000	106930000	272220000	57460000	37906000	395110000	325790000	357480000	70486000	37849000	84277000	0	0	57093000	65405000	41532000	36332000	161530000	124600000	112400000	55515000	16
tr|A0A1S3ZD62|A0A1S3ZD62_TOBAC;sp|P93349|XTH_TOBAC;tr|O80431|O80431_TOBAC	tr|A0A1S3ZD62|A0A1S3ZD62_TOBAC Xyloglucan endotransglucosylase/hydrolase OS=Nicotiana tabacum OX=4097 GN=LOC107785465 PE=3 SV=1;sp|P93349|XTH_TOBAC Probable xyloglucan endotransglucosylase/hydrolase protein OS=Nicotiana tabacum OX=4097 GN=XTH PE=2 SV=1;tr|	7	7	6	26.8	26.8	23.4	25.364	454130000	816770000	342130000	422500000	563080000	620130000	397600000	257750000	612820000	690730000	1119700000	359420000	182000000	172150000	223360000	341650000	146270000	157320000	183510000	157820000	184620000	159830000	238540000	261260000	40
sp|P93373|ACT3_TOBAC	sp|P93373|ACT3_TOBAC Actin-54 (Fragment) OS=Nicotiana tabacum OX=4097 PE=3 SV=1	14	1	0	50.4	4.7	0	58.717	414350000	620890000	126570000	169880000	493370000	497830000	199060000	144090000	396720000	343050000	323830000	114020000	0	0	0	0	0	0	0	0	0	0	0	0	23
sp|Q40507|GBB3_TOBAC;tr|Q9FV61|Q9FV61_TOBAC;tr|A0A1S4A324|A0A1S4A324_TOBAC;tr|A0A1S3X384|A0A1S3X384_TOBAC;sp|P93398|GBB2_TOBAC;sp|P93397|GBB1_TOBAC	sp|Q40507|GBB3_TOBAC Guanine nucleotide-binding protein subunit beta OS=Nicotiana tabacum OX=4097 PE=2 SV=1;tr|Q9FV61|Q9FV61_TOBAC Heterotrimeric GTP-binding protein subunit beta 1 OS=Nicotiana tabacum OX=4097 PE=2 SV=1;tr|A0A1S4A324|A0A1S4A324_TOBAC guani	1	1	1	3.5	3.5	3.5	5.0063	25335000	0	13070000	12402000	44548000	112800000	33864000	18275000	56581000	88320000	85313000	22241000	0	0	0	0	0	0	0	0	0	0	0	0	2
tr|A0A1S3Z1Q7|A0A1S3Z1Q7_TOBAC;tr|A0A1S3YU94|A0A1S3YU94_TOBAC;sp|P93400|PLDA1_TOBAC	tr|A0A1S3Z1Q7|A0A1S3Z1Q7_TOBAC Phospholipase D OS=Nicotiana tabacum OX=4097 GN=LOC107782014 PE=3 SV=1;tr|A0A1S3YU94|A0A1S3YU94_TOBAC Phospholipase D OS=Nicotiana tabacum OX=4097 GN=LOC107779725 PE=3 SV=1;sp|P93400|PLDA1_TOBAC Phospholipase D alpha 1 OS=Nic	4	4	4	7.8	7.8	7.8	37.711	814160000	566790000	382320000	294370000	1137400000	603210000	310480000	282750000	849540000	823270000	923910000	517650000	446740000	248290000	388060000	295880000	335460000	207570000	261000000	388670000	354570000	310480000	366170000	592670000	21
tr|A0A1S4BV85|A0A1S4BV85_TOBAC;tr|A0A1S3XPF3|A0A1S3XPF3_TOBAC;sp|P93768|PSMD3_TOBAC	tr|A0A1S4BV85|A0A1S4BV85_TOBAC probable 26S proteasome non-ATPase regulatory subunit 3 OS=Nicotiana tabacum OX=4097 GN=LOC107812249 PE=3 SV=1;tr|A0A1S3XPF3|A0A1S3XPF3_TOBAC probable 26S proteasome non-ATPase regulatory subunit 3 OS=Nicotiana tabacum OX=409	4	4	4	9.6	9.6	9.6	70.764	339860000	444180000	157740000	174540000	317140000	347400000	224900000	72891000	223100000	298820000	300860000	218950000	129430000	123960000	87520000	124840000	91442000	77886000	92721000	107300000	133420000	80407000	100450000	111770000	30
sp|Q02764|RK24_TOBAC;tr|A0A1S3X831|A0A1S3X831_TOBAC	sp|Q02764|RK24_TOBAC 50S ribosomal protein L24, chloroplastic OS=Nicotiana tabacum OX=4097 GN=RPL24 PE=1 SV=1;tr|A0A1S3X831|A0A1S3X831_TOBAC 50S ribosomal protein L24, chloroplastic OS=Nicotiana tabacum OX=4097 GN=LOC107762137 PE=3 SV=1	3	3	1	16.6	16.6	4.8	17.466	166050000	508120000	135550000	163920000	297540000	177770000	398030000	185150000	264650000	234850000	406910000	89188000	111920000	210680000	154020000	174190000	146000000	156620000	220260000	233370000	121720000	98758000	150420000	104220000	16
tr|A0A1S4CYD1|A0A1S4CYD1_TOBAC;tr|A0A1S3Z4S2|A0A1S3Z4S2_TOBAC;sp|Q03666|GSTX4_TOBAC;tr|Q40534|Q40534_TOBAC;sp|P49332|GSTXC_TOBAC	tr|A0A1S4CYD1|A0A1S4CYD1_TOBAC glutathione transferase OS=Nicotiana tabacum OX=4097 GN=LOC107823949 PE=4 SV=1;tr|A0A1S3Z4S2|A0A1S3Z4S2_TOBAC glutathione transferase OS=Nicotiana tabacum OX=4097 GN=LOC107782951 PE=4 SV=1;sp|Q03666|GSTX4_TOBAC Probable gluta	2	1	1	7.7	4.1	4.1	2.7011	0	19138000	5954800	465800	24098000	39017000	14216000	2116400	37097000	39390000	47377000	257710	0	0	0	0	0	0	0	0	0	0	0	0	5
tr|A0A1S3Y2B1|A0A1S3Y2B1_TOBAC;sp|Q03685|BIP5_TOBAC;tr|A0A1S3Y1G1|A0A1S3Y1G1_TOBAC	tr|A0A1S3Y2B1|A0A1S3Y2B1_TOBAC luminal-binding protein 5 OS=Nicotiana tabacum OX=4097 GN=LOC107771425 PE=3 SV=1;sp|Q03685|BIP5_TOBAC Luminal-binding protein 5 OS=Nicotiana tabacum OX=4097 GN=BIP5 PE=2 SV=1;tr|A0A1S3Y1G1|A0A1S3Y1G1_TOBAC luminal-binding pro	31	29	5	56.1	53.6	11.4	323.31	9924100000	17727000000	7309200000	5870800000	14494000000	14952000000	7356100000	4076600000	11147000000	12353000000	18479000000	5430800000	1119900000	1054900000	1365100000	1275300000	1051900000	829330000	835470000	826580000	783020000	797620000	905650000	943510000	432
tr|A0A1S3XSQ1|A0A1S3XSQ1_TOBAC;sp|Q07760|RL23_TOBAC	tr|A0A1S3XSQ1|A0A1S3XSQ1_TOBAC 60S ribosomal protein L23 OS=Nicotiana tabacum OX=4097 GN=LOC107768301 PE=3 SV=1;sp|Q07760|RL23_TOBAC 60S ribosomal protein L23 OS=Nicotiana tabacum OX=4097 GN=RPL23 PE=2 SV=1	6	6	2	48.6	48.6	20	27.534	548970000	807760000	340250000	308530000	619880000	1214900000	679050000	197230000	403440000	580210000	1097700000	245880000	270770000	218140000	313970000	301270000	238170000	232010000	278990000	212250000	185760000	229370000	307380000	213990000	42
tr|A0A1S4CRZ6|A0A1S4CRZ6_TOBAC;tr|A0A1S3Y859|A0A1S3Y859_TOBAC;tr|A0A1S4DDT0|A0A1S4DDT0_TOBAC;tr|A0A1S4CRI5|A0A1S4CRI5_TOBAC;tr|A0A1S4B712|A0A1S4B712_TOBAC;tr|A0A1S4AEM2|A0A1S4AEM2_TOBAC;tr|A0A1S3Y8M9|A0A1S3Y8M9_TOBAC;tr|A0A1S3Y2N8|A0A1S3Y2N8_TOBAC;sp|Q07761|RL23A_TOBAC	tr|A0A1S4CRZ6|A0A1S4CRZ6_TOBAC 60S ribosomal protein L23a-like isoform X2 OS=Nicotiana tabacum OX=4097 GN=LOC107821921 PE=3 SV=1;tr|A0A1S3Y859|A0A1S3Y859_TOBAC 60S ribosomal protein L23a-like isoform X2 OS=Nicotiana tabacum OX=4097 GN=LOC107773598 PE=3 SV=	7	7	3	34.6	34.6	14.4	23.324	1233400000	4921400000	1406200000	1235000000	3976600000	4059100000	1283200000	582290000	1973400000	3042400000	4311900000	1091400000	763590000	2285100000	1656100000	1825600000	2016100000	1517200000	1021200000	875860000	874570000	1378000000	1526800000	851120000	43
sp|Q285L8|RS3A_TOBAC;tr|A0A1S4A7Q3|A0A1S4A7Q3_TOBAC;tr|A0A1S3XJC8|A0A1S3XJC8_TOBAC	sp|Q285L8|RS3A_TOBAC 40S ribosomal protein S3a OS=Nicotiana tabacum OX=4097 GN=cyc07 PE=2 SV=1;tr|A0A1S4A7Q3|A0A1S4A7Q3_TOBAC 40S ribosomal protein S3a OS=Nicotiana tabacum OX=4097 GN=LOC107794621 PE=3 SV=1;tr|A0A1S3XJC8|A0A1S3XJC8_TOBAC 40S ribosomal prot	12	2	2	51.7	14.2	14.2	72.322	694860000	2074000000	528390000	440370000	1227500000	1705800000	1110300000	203350000	1195400000	1163100000	1370400000	400290000	381830000	593150000	521640000	401510000	525220000	482600000	633200000	250870000	427020000	388480000	423990000	354360000	40
tr|A0A1S4CLK5|A0A1S4CLK5_TOBAC;sp|Q40459|PSBO_TOBAC	tr|A0A1S4CLK5|A0A1S4CLK5_TOBAC oxygen-evolving enhancer protein 1, chloroplastic OS=Nicotiana tabacum OX=4097 GN=LOC107820252 PE=3 SV=1;sp|Q40459|PSBO_TOBAC Oxygen-evolving enhancer protein 1, chloroplastic OS=Nicotiana tabacum OX=4097 GN=PSBO PE=2 SV=1	13	1	0	45.8	9.6	0	55.553	2916700000	3194100000	732610000	1858700000	1247800000	3031900000	1442700000	2421900000	4218200000	6170100000	5021200000	1522000000	2295600000	1294900000	1102700000	2403500000	727950000	1263300000	1128400000	4393400000	2126100000	3317000000	2071100000	2015100000	40
tr|A0A1S4CJP2|A0A1S4CJP2_TOBAC;sp|Q40460|RCA1_TOBAC;tr|A0A1S4CKB3|A0A1S4CKB3_TOBAC;tr|A0A1S4AWG6|A0A1S4AWG6_TOBAC;tr|A0A1S4AW82|A0A1S4AW82_TOBAC	tr|A0A1S4CJP2|A0A1S4CJP2_TOBAC Ribulose bisphosphate carboxylase/oxygenase activase, chloroplastic OS=Nicotiana tabacum OX=4097 GN=LOC107819807 PE=3 SV=1;sp|Q40460|RCA1_TOBAC Ribulose bisphosphate carboxylase/oxygenase activase 1, chloroplastic OS=Nicotian	23	7	6	55.4	16.1	13.6	21.877	2210500000	5261600000	565630000	1154300000	2664100000	2948600000	1596400000	530710000	2211200000	2299000000	2191000000	763770000	669390000	808000000	514020000	672160000	643220000	599840000	533480000	546950000	557670000	586550000	535330000	512360000	50
tr|A0A1S3Z7M8|A0A1S3Z7M8_TOBAC;tr|A0A1S4B5X7|A0A1S4B5X7_TOBAC;sp|Q40465|IF411_TOBAC;tr|A0A1S3Z7E5|A0A1S3Z7E5_TOBAC;tr|A0A1S3XE25|A0A1S3XE25_TOBAC;sp|Q40467|IF414_TOBAC;sp|Q40470|IF4A7_TOBAC;sp|P41382|IF410_TOBAC;sp|Q40466|IF413_TOBAC;sp|P41381|IF4A8_TOBAC;tr|A0A1S4CRR1|A0A1S4CRR1_TOBAC;tr|A0A1S4B706|A0A1S4B706_TOBAC;tr|A0A1S4B711|A0A1S4B711_TOBAC;tr|A0A1S4B7A1|A0A1S4B7A1_TOBAC	tr|A0A1S3Z7M8|A0A1S3Z7M8_TOBAC eukaryotic initiation factor 4A-10 OS=Nicotiana tabacum OX=4097 GN=LOC107783884 PE=3 SV=1;tr|A0A1S4B5X7|A0A1S4B5X7_TOBAC eukaryotic initiation factor 4A-11 OS=Nicotiana tabacum OX=4097 GN=LOC107804833 PE=3 SV=1;sp|Q40465|IF41	13	13	2	41.4	41.4	6.8	57.82	1650000000	4761700000	1039700000	570060000	1298000000	2621500000	1456700000	982170000	2150200000	1780800000	1923700000	733060000	606170000	508080000	466280000	399630000	281210000	404950000	521980000	750640000	531400000	411150000	407800000	524980000	82
tr|A0A1S3ZI87|A0A1S3ZI87_TOBAC;tr|A0A1S3YM69|A0A1S3YM69_TOBAC;sp|Q40471|IF4A9_TOBAC;tr|A0A1S4C3S7|A0A1S4C3S7_TOBAC;sp|Q40468|IF415_TOBAC	tr|A0A1S3ZI87|A0A1S3ZI87_TOBAC eukaryotic initiation factor 4A-9 OS=Nicotiana tabacum OX=4097 GN=LOC107787142 PE=3 SV=1;tr|A0A1S3YM69|A0A1S3YM69_TOBAC eukaryotic initiation factor 4A-9-like OS=Nicotiana tabacum OX=4097 GN=LOC107777566 PE=3 SV=1;sp|Q40471|I	13	2	2	45	10.4	10.4	6.8356	139020000	85983000	37577000	34193000	68646000	87364000	65683000	35822000	193570000	110790000	192110000	27270000	69769000	0	35739000	36949000	22538000	0	0	0	65526000	25446000	62946000	30192000	12
tr|A0A1S4CAS4|A0A1S4CAS4_TOBAC;sp|Q40519|PSBR_TOBAC;tr|A0A1S4BNL9|A0A1S4BNL9_TOBAC	tr|A0A1S4CAS4|A0A1S4CAS4_TOBAC Photosystem II 10 kDa polypeptide, chloroplastic OS=Nicotiana tabacum OX=4097 GN=LOC107816978 PE=3 SV=1;sp|Q40519|PSBR_TOBAC Photosystem II 10 kDa polypeptide, chloroplastic OS=Nicotiana tabacum OX=4097 GN=PSBR PE=2 SV=1;tr|A	2	2	2	7.4	7.4	7.4	4.705	540230000	1285500000	325670000	228170000	772920000	773750000	327740000	196830000	748140000	710260000	765510000	205620000	383910000	566040000	587440000	337260000	445970000	508830000	333140000	270670000	0	344660000	390720000	340090000	40
tr|A0A1S3Z861|A0A1S3Z861_TOBAC;tr|A0A1S4ATG4|A0A1S4ATG4_TOBAC;sp|Q40521|RB11B_TOBAC;tr|A0A1S4CKH8|A0A1S4CKH8_TOBAC;tr|A0A1S4B462|A0A1S4B462_TOBAC;tr|A0A1S4ANH7|A0A1S4ANH7_TOBAC;tr|A0A1S3XZY8|A0A1S3XZY8_TOBAC;tr|A0A1S3Y8C4|A0A1S3Y8C4_TOBAC;tr|A0A1S4CT21|A0A1S4CT21_TOBAC;sp|Q40523|RB11A_TOBAC;tr|A0A1S4DCP5|A0A1S4DCP5_TOBAC;tr|A0A1S3ZAU9|A0A1S3ZAU9_TOBAC;tr|A0A1S4AR41|A0A1S4AR41_TOBAC;tr|A0A1S3XSU6|…	tr|A0A1S3Z861|A0A1S3Z861_TOBAC ras-related protein RABA1f-like OS=Nicotiana tabacum OX=4097 GN=LOC107784040 PE=4 SV=1;tr|A0A1S4ATG4|A0A1S4ATG4_TOBAC ras-related protein Rab2BV-like OS=Nicotiana tabacum OX=4097 GN=LOC107801049 PE=4 SV=1;sp|Q40521|RB11B_TOBA	1	1	1	13.2	13.2	13.2	3.5572	45890000	113250000	28774000	35653000	76864000	123130000	35529000	20464000	125980000	91198000	110330000	23486000	0	0	0	0	0	0	0	0	0	0	0	0	6
tr|Q8W1L1|Q8W1L1_TOBAC;tr|Q38HM5|Q38HM5_TOBAC;tr|A0A1S4DFV8|A0A1S4DFV8_TOBAC;tr|O04362|O04362_TOBAC;tr|A0A1S3Z5Y0|A0A1S3Z5Y0_TOBAC;sp|Q40532|NTF4_TOBAC;tr|A0A1S4DM95|A0A1S4DM95_TOBAC;tr|Q38HM6|Q38HM6_TOBAC	tr|Q8W1L1|Q8W1L1_TOBAC MAPK protein kinase (Fragment) OS=Nicotiana tabacum OX=4097 PE=2 SV=1;tr|Q38HM5|Q38HM5_TOBAC Mitogen-activated protein kinase OS=Nicotiana tabacum OX=4097 PE=2 SV=1;tr|A0A1S4DFV8|A0A1S4DFV8_TOBAC Mitogen-activated protein kinase OS=N	2	1	1	26.6	15.4	15.4	8.28	162940000	121510000	84927000	113070000	83415000	137020000	64620000	63987000	101890000	84554000	111860000	60090000	0	0	0	0	0	0	0	0	0	0	0	0	1
tr|A0A1S3YLX2|A0A1S3YLX2_TOBAC;sp|Q40545|KPYA_TOBAC	tr|A0A1S3YLX2|A0A1S3YLX2_TOBAC Pyruvate kinase OS=Nicotiana tabacum OX=4097 GN=LOC107777547 PE=3 SV=1;sp|Q40545|KPYA_TOBAC Pyruvate kinase isozyme A, chloroplastic OS=Nicotiana tabacum OX=4097 PE=2 SV=1	1	1	1	2.1	2.1	2.1	4.177	40369000	0	14831000	25489000	31382000	38838000	22794000	11498000	46955000	39198000	0	17689000	0	0	0	0	0	0	0	0	0	0	0	0	2
tr|A0A1S3X135|A0A1S3X135_TOBAC;tr|A0A1S3Z3K3|A0A1S3Z3K3_TOBAC;sp|Q40554|EIF3A_TOBAC;tr|A0A1S4ASL9|A0A1S4ASL9_TOBAC	tr|A0A1S3X135|A0A1S3X135_TOBAC eukaryotic translation initiation factor 3 subunit A-like OS=Nicotiana tabacum OX=4097 GN=LOC107760201 PE=4 SV=1;tr|A0A1S3Z3K3|A0A1S3Z3K3_TOBAC Eukaryotic translation initiation factor 3 subunit A OS=Nicotiana tabacum OX=4097	7	7	3	16.1	16.1	6.9	35.773	522140000	892300000	202830000	145150000	634890000	401300000	229750000	92512000	741330000	597120000	832110000	123590000	164790000	104400000	113330000	100960000	103490000	66076000	81083000	86233000	137710000	83680000	111070000	104830000	34
sp|Q40577|5EAS_TOBAC	sp|Q40577|5EAS_TOBAC 5-epi-aristolochene synthase OS=Nicotiana tabacum OX=4097 GN=EAS4 PE=1 SV=3	17	1	1	35.9	2.4	2.4	9.1392	98353000	0	27719000	32251000	45445000	86024000	0	0	104310000	0	81647000	59252000	0	0	0	0	0	0	0	0	0	0	0	0	9
sp|Q42942|UMPS_TOBAC;tr|A0A1S3XKB9|A0A1S3XKB9_TOBAC;tr|A0A1S4A7T6|A0A1S4A7T6_TOBAC	sp|Q42942|UMPS_TOBAC Uridine 5-monophosphate synthase (Fragment) OS=Nicotiana tabacum OX=4097 GN=PYR5-6 PE=2 SV=1;tr|A0A1S3XKB9|A0A1S3XKB9_TOBAC Uridine 5-monophosphate synthase OS=Nicotiana tabacum OX=4097 GN=LOC107765924 PE=3 SV=1;tr|A0A1S4A7T6|A0A1S4A	3	3	3	11.7	11.7	11.7	23.244	67745000	102700000	0	19559000	0	113110000	80514000	52713000	235470000	229150000	215370000	98427000	54408000	47235000	0	0	0	49921000	58969000	0	76393000	77229000	68129000	81586000	7
tr|A0A1S4BQB2|A0A1S4BQB2_TOBAC;sp|Q42945|CAMT6_TOBAC	tr|A0A1S4BQB2|A0A1S4BQB2_TOBAC caffeoyl-CoA O-methyltransferase OS=Nicotiana tabacum OX=4097 GN=LOC107810774 PE=3 SV=1;sp|Q42945|CAMT6_TOBAC Caffeoyl-CoA O-methyltransferase 6 OS=Nicotiana tabacum OX=4097 GN=CCOAOMT6 PE=2 SV=1	4	1	1	22.7	4.9	4.9	4.2062	116410000	351940000	79184000	83657000	325000000	299540000	106790000	31078000	207840000	388460000	343580000	66084000	0	0	0	0	0	0	0	0	0	0	0	0	11
tr|A0A1S4BGF6|A0A1S4BGF6_TOBAC;tr|A0A1S4AIM7|A0A1S4AIM7_TOBAC;sp|Q42954|KPYC_TOBAC	tr|A0A1S4BGF6|A0A1S4BGF6_TOBAC Pyruvate kinase OS=Nicotiana tabacum OX=4097 GN=LOC107807979 PE=3 SV=1;tr|A0A1S4AIM7|A0A1S4AIM7_TOBAC Pyruvate kinase OS=Nicotiana tabacum OX=4097 GN=LOC107797877 PE=3 SV=1;sp|Q42954|KPYC_TOBAC Pyruvate kinase, cytosolic isoz	3	2	2	9.4	7.5	7.5	14.684	37472000	80027000	10827000	19473000	35021000	0	0	7841100	115490000	161300000	106820000	0	26308000	0	0	0	0	0	0	0	0	59049000	31663000	0	3
tr|Q9LL88|Q9LL88_TOBAC;tr|A0A1S4DEP9|A0A1S4DEP9_TOBAC;tr|A0A1S3ZF58|A0A1S3ZF58_TOBAC;sp|Q43793|G6PDC_TOBAC	tr|Q9LL88|Q9LL88_TOBAC Glucose-6-phosphate 1-dehydrogenase OS=Nicotiana tabacum OX=4097 GN=G6PDHP2 PE=3 SV=1;tr|A0A1S4DEP9|A0A1S4DEP9_TOBAC Glucose-6-phosphate 1-dehydrogenase OS=Nicotiana tabacum OX=4097 GN=LOC107828938 PE=3 SV=1;tr|A0A1S3ZF58|A0A1S3ZF58_	1	1	1	2.7	2.7	2.7	9.7788	97878000	326560000	55115000	39984000	97551000	71521000	33231000	26682000	112720000	87201000	121810000	39875000	0	0	0	0	0	0	0	0	0	0	0	0	2
tr|A0A1S3ZUE6|A0A1S3ZUE6_TOBAC;tr|A0A1S3Y388|A0A1S3Y388_TOBAC;sp|Q56E62|NDK1_TOBAC;tr|A0A1S3XTY9|A0A1S3XTY9_TOBAC;tr|A0A1S4C287|A0A1S4C287_TOBAC;tr|A0A1S3X9D6|A0A1S3X9D6_TOBAC	tr|A0A1S3ZUE6|A0A1S3ZUE6_TOBAC Nucleoside diphosphate kinase OS=Nicotiana tabacum OX=4097 GN=LOC107790563 PE=3 SV=1;tr|A0A1S3Y388|A0A1S3Y388_TOBAC Nucleoside diphosphate kinase OS=Nicotiana tabacum OX=4097 GN=LOC107771678 PE=3 SV=1;sp|Q56E62|NDK1_TOBAC Nuc	2	2	2	14.9	14.9	14.9	17.488	0	72308000	11489000	12658000	82205000	148350000	45125000	15466000	93428000	97805000	221210000	35255000	0	57806000	9642100	0	57830000	37464000	31281000	6116200	52321000	52848000	77070000	0	17
tr|A0A1S4D5Q9|A0A1S4D5Q9_TOBAC;tr|A0A1S3Z1U6|A0A1S3Z1U6_TOBAC;tr|A0A1S4AP66|A0A1S4AP66_TOBAC;sp|Q589Y0|MAT1_TOBAC	tr|A0A1S4D5Q9|A0A1S4D5Q9_TOBAC malonyl-coenzyme:anthocyanin 5-O-glucoside-6-O-malonyltransferase-like OS=Nicotiana tabacum OX=4097 GN=LOC107826321 PE=4 SV=1;tr|A0A1S3Z1U6|A0A1S3Z1U6_TOBAC malonyl-coenzyme:anthocyanin 5-O-glucoside-6-O-malonyltransfer	1	1	1	3.5	3.5	3.5	2.745	21130000	28653000	0	0	75211000	49857000	17852000	6845900	33080000	55770000	44627000	14097000	0	0	0	0	0	0	0	0	0	0	0	0	6
tr|A7VMF1|A7VMF1_TOBAC;tr|A0A1S4C8B6|A0A1S4C8B6_TOBAC;sp|Q76MV0|H32_TOBAC;tr|A0A1S4B5Z3|A0A1S4B5Z3_TOBAC;tr|A0A1S4B4I6|A0A1S4B4I6_TOBAC;tr|A0A1S3YFK5|A0A1S3YFK5_TOBAC	tr|A7VMF1|A7VMF1_TOBAC Histone H3 OS=Nicotiana tabacum OX=4097 GN=NthisH3.1 PE=2 SV=1;tr|A0A1S4C8B6|A0A1S4C8B6_TOBAC Histone H3 OS=Nicotiana tabacum OX=4097 GN=LOC107816201 PE=3 SV=1;sp|Q76MV0|H32_TOBAC Histone H3.2 OS=Nicotiana tabacum OX=4097 GN=B34 PE=1	5	2	2	45.6	30.1	30.1	70.626	3871000000	5251500000	4057600000	2529500000	4778500000	6753600000	7205600000	6826100000	8953600000	7624900000	8606200000	10579000000	2577300000	1833600000	4622200000	3131800000	2268600000	2134500000	4560200000	9118500000	4212500000	2993000000	3159200000	11383000000	60
tr|A7VMP6|A7VMP6_TOBAC;tr|A0A1S4BPN0|A0A1S4BPN0_TOBAC;sp|Q76N23|H33_TOBAC	tr|A7VMP6|A7VMP6_TOBAC Histone H3.2 (Fragment) OS=Nicotiana tabacum OX=4097 PE=2 SV=1;tr|A0A1S4BPN0|A0A1S4BPN0_TOBAC Histone H3 OS=Nicotiana tabacum OX=4097 GN=LOC107810536 PE=3 SV=1;sp|Q76N23|H33_TOBAC Histone H3.3 OS=Nicotiana tabacum OX=4097 GN=H3 PE=1	5	5	2	55.4	55.4	36.6	76.838	4631800000	6343000000	4679300000	2118900000	6301000000	7828500000	6872200000	6969900000	8032400000	4903100000	16448000000	6287400000	2496800000	2121600000	5436300000	2523700000	2678400000	3309200000	4726900000	8246400000	4329100000	3526800000	5582700000	5748000000	66
tr|A0A1S3ZS78|A0A1S3ZS78_TOBAC;sp|Q8RX97|FRI1_TOBAC	tr|A0A1S3ZS78|A0A1S3ZS78_TOBAC Ferritin OS=Nicotiana tabacum OX=4097 GN=LOC107789800 PE=3 SV=1;sp|Q8RX97|FRI1_TOBAC Ferritin-1, chloroplastic OS=Nicotiana tabacum OX=4097 GN=FER1 PE=2 SV=1	8	8	1	33.9	33.9	4	98.563	2912800000	2084100000	1849200000	1235900000	2976300000	3525900000	1890600000	987850000	2065400000	1400100000	3482500000	1620200000	899890000	525710000	629030000	722230000	822150000	780940000	1065200000	608240000	529140000	576620000	717860000	863710000	78
tr|A0A1S3X6X9|A0A1S3X6X9_TOBAC;sp|Q93YF5|SUVH1_TOBAC	tr|A0A1S3X6X9|A0A1S3X6X9_TOBAC histone-lysine N-methyltransferase, H3 lysine-9 specific SUVH1 OS=Nicotiana tabacum OX=4097 GN=LOC107761901 PE=4 SV=1;sp|Q93YF5|SUVH1_TOBAC Histone-lysine N-methyltransferase, H3 lysine-9 specific SUVH1 OS=Nicotiana tabacum O	1	1	1	1.3	1.3	1.3	5.2296	45361000	39565000	0	37827000	39553000	59072000	39519000	37235000	56247000	46735000	33011000	40069000	0	0	0	0	0	0	0	0	0	0	0	0	7
tr|A1XEM1|A1XEM1_TOBAC;tr|A0A1S3WY82|A0A1S3WY82_TOBAC;sp|Q94FM7|C71DK_TOBAC;tr|A0A1S4A9J8|A0A1S4A9J8_TOBAC;tr|Q94FM6|Q94FM6_TOBAC;tr|A0A1S4D1Y4|A0A1S4D1Y4_TOBAC;tr|A0A1S4D1N6|A0A1S4D1N6_TOBAC	tr|A1XEM1|A1XEM1_TOBAC CYP71D20v2 OS=Nicotiana tabacum OX=4097 PE=2 SV=1;tr|A0A1S3WY82|A0A1S3WY82_TOBAC 5-epiaristolochene 1,3-dihydroxylase OS=Nicotiana tabacum OX=4097 GN=LOC107759261 PE=3 SV=1;sp|Q94FM7|C71DK_TOBAC 5-epiaristolochene 1,3-dihydroxylase O	5	5	3	13.9	13.9	8.7	23.698	323400000	545960000	192660000	109940000	352690000	321960000	122830000	49338000	300050000	297700000	412950000	138780000	0	109380000	126980000	0	0	53224000	0	0	83417000	58869000	66146000	64994000	7
tr|A0A1S4DL05|A0A1S4DL05_TOBAC;tr|A0A1S4DLD7|A0A1S4DLD7_TOBAC;tr|A0A1S4D3I5|A0A1S4D3I5_TOBAC;sp|Q9SLN8|DBR_TOBAC	tr|A0A1S4DL05|A0A1S4DL05_TOBAC 2-alkenal reductase (NADP(+)-dependent)-like OS=Nicotiana tabacum OX=4097 GN=LOC107830911 PE=4 SV=1;tr|A0A1S4DLD7|A0A1S4DLD7_TOBAC 2-alkenal reductase (NADP(+)-dependent) OS=Nicotiana tabacum OX=4097 GN=LOC107830910 PE=4 SV=1	1	1	1	26.4	26.4	26.4	34.672	92438000	97160000	51241000	50625000	57674000	59148000	38746000	35711000	52800000	49738000	83886000	46677000	0	0	0	0	0	0	0	0	0	0	0	0	11
sp|Q9XG77|PSA6_TOBAC;tr|A0A1S4C6Q7|A0A1S4C6Q7_TOBAC;tr|A0A1S4CYK4|A0A1S4CYK4_TOBAC	sp|Q9XG77|PSA6_TOBAC Proteasome subunit alpha type-6 OS=Nicotiana tabacum OX=4097 GN=PAA1 PE=2 SV=1;tr|A0A1S4C6Q7|A0A1S4C6Q7_TOBAC Proteasome subunit alpha type OS=Nicotiana tabacum OX=4097 GN=LOC107815705 PE=3 SV=1;tr|A0A1S4CYK4|A0A1S4CYK4_TOBAC Proteasom	4	4	4	28.5	28.5	28.5	43.453	69144000	37571000	22428000	34840000	130020000	165990000	80402000	61807000	295670000	311810000	271500000	101180000	58941000	0	0	0	31422000	49511000	42525000	65474000	78280000	78279000	79395000	75552000	20
tr|A2V884|A2V884_TOBAC;tr|A0A1S4DA91|A0A1S4DA91_TOBAC;tr|A0A0F7CYG6|A0A0F7CYG6_TOBAC;sp|Q9XHL7|TCTP_TOBAC;tr|A0A1S4DA45|A0A1S4DA45_TOBAC;tr|A0A1S3Z332|A0A1S3Z332_TOBAC	tr|A2V884|A2V884_TOBAC Translationally controlled tumor protein like protein (Fragment) OS=Nicotiana tabacum OX=4097 GN=RsRG3-8 PE=2 SV=1;tr|A0A1S4DA91|A0A1S4DA91_TOBAC translationally-controlled tumor protein homolog OS=Nicotiana tabacum OX=4097 GN=LOC107	4	4	4	27.8	27.8	27.8	14.684	151950000	606430000	113230000	68170000	109210000	284720000	66622000	72664000	477320000	366690000	540810000	68902000	84313000	138860000	56417000	0	55912000	84308000	51419000	54493000	183100000	123530000	164770000	69856000	17
tr|A0A1S3Y6X8|A0A1S3Y6X8_TOBAC;sp|Q9XIV8|PERN1_TOBAC;tr|A0A1S4B2V1|A0A1S4B2V1_TOBAC	tr|A0A1S3Y6X8|A0A1S3Y6X8_TOBAC peroxidase OS=Nicotiana tabacum OX=4097 GN=LOC107773042 PE=3 SV=1;sp|Q9XIV8|PERN1_TOBAC Peroxidase N1 OS=Nicotiana tabacum OX=4097 GN=poxN1 PE=1 SV=1;tr|A0A1S4B2V1|A0A1S4B2V1_TOBAC Peroxidase OS=Nicotiana tabacum OX=4097 GN=L	2	2	2	11.9	11.9	11.9	5.9003	0	0	16338000	0	0	56493000	24634000	20954000	23111000	20347000	36793000	44357000	0	0	0	0	0	0	0	0	0	0	0	0	3
tr|A0A1S4DJC0|A0A1S4DJC0_TOBAC;tr|A0A1S3Z5N4|A0A1S3Z5N4_TOBAC;sp|Q9ZS34|CHLP_TOBAC;tr|A0A067YDS6|A0A067YDS6_TOBAC;tr|A0A1S4DJC8|A0A1S4DJC8_TOBAC	tr|A0A1S4DJC0|A0A1S4DJC0_TOBAC geranylgeranyl diphosphate reductase OS=Nicotiana tabacum OX=4097 GN=LOC107830453 PE=3 SV=1;tr|A0A1S3Z5N4|A0A1S3Z5N4_TOBAC geranylgeranyl diphosphate reductase OS=Nicotiana tabacum OX=4097 GN=LOC107783257 PE=3 SV=1;sp|Q9ZS34|	15	15	15	36.2	36.2	36.2	106.24	694080000	3021000000	528820000	390190000	1206400000	1501900000	825250000	370770000	1336000000	878210000	1431700000	430010000	231090000	407260000	247580000	223010000	221940000	202780000	155040000	193460000	174690000	182790000	201540000	174630000	110
tr|A0A1S4CU07|A0A1S4CU07_TOBAC;tr|A0A059TCI1|A0A059TCI1_TOBAC	tr|A0A1S4CU07|A0A1S4CU07_TOBAC Cysteine proteinase inhibitor OS=Nicotiana tabacum OX=4097 GN=LOC107822566 PE=3 SV=1;tr|A0A059TCI1|A0A059TCI1_TOBAC Cysteine proteinase inhibitor OS=Nicotiana tabacum OX=4097 GN=LOC107761445 PE=2 SV=1	1	1	1	16.3	16.3	16.3	9.2361	26089000	172190000	19472000	15785000	54741000	69544000	0	38993000	42467000	0	70243000	0	0	0	0	0	0	0	0	0	0	0	0	0	2
tr|A0A1S3XED7|A0A1S3XED7_TOBAC;tr|A0A059TCM2|A0A059TCM2_TOBAC	tr|A0A1S3XED7|A0A1S3XED7_TOBAC cysteine proteinase inhibitor 5-like OS=Nicotiana tabacum OX=4097 GN=LOC107764160 PE=4 SV=1;tr|A0A059TCM2|A0A059TCM2_TOBAC Cystein protease inhibitor 4 OS=Nicotiana tabacum OX=4097 GN=LOC107777707 PE=2 SV=1	1	1	1	9.8	9.8	9.8	2.9283	0	0	0	0	28194000	25471000	9443500	0	16217000	22997000	17103000	0	0	0	0	0	0	0	0	0	0	0	0	0	1
tr|A0A059XID0|A0A059XID0_TOBAC;tr|A0A1S4BM24|A0A1S4BM24_TOBAC;tr|A0A1S4BM74|A0A1S4BM74_TOBAC	tr|A0A059XID0|A0A059XID0_TOBAC Chloroplast omega-6 fatty acid desaturase OS=Nicotiana tabacum OX=4097 PE=2 SV=1;tr|A0A1S4BM24|A0A1S4BM24_TOBAC omega-6 fatty acid desaturase, chloroplastic-like isoform X2 OS=Nicotiana tabacum OX=4097 GN=LOC107809769 PE=4 SV	1	1	1	5	5	5	3.0981	9886200	6507700	4929100	0	0	5812600	6998800	33701000	7850100	8296900	37637000	13516000	0	0	0	0	0	0	0	42282000	0	0	10121000	10818000	4
tr|A0A1S3ZAM9|A0A1S3ZAM9_TOBAC;tr|A0A068JCD2|A0A068JCD2_TOBAC;tr|A0A1S4A023|A0A1S4A023_TOBAC;tr|A0A1S3Z9Y6|A0A1S3Z9Y6_TOBAC	tr|A0A1S3ZAM9|A0A1S3ZAM9_TOBAC fructose-bisphosphatase OS=Nicotiana tabacum OX=4097 GN=LOC107784747 PE=3 SV=1;tr|A0A068JCD2|A0A068JCD2_TOBAC fructose-bisphosphatase OS=Nicotiana tabacum OX=4097 PE=2 SV=1;tr|A0A1S4A023|A0A1S4A023_TOBAC fructose-bisphosphata	5	5	5	15.9	15.9	15.9	27.961	252190000	483170000	136520000	173680000	225400000	512140000	207550000	206550000	368240000	443920000	493260000	165370000	93992000	98431000	109960000	99511000	59579000	97407000	133140000	128290000	81874000	98567000	74355000	100880000	27
tr|A0A1S4CH99|A0A1S4CH99_TOBAC;tr|A0A1S4CCN8|A0A1S4CCN8_TOBAC;tr|A0A068JCD7|A0A068JCD7_TOBAC;tr|Q8H976|Q8H976_TOBAC;tr|A0A077D839|A0A077D839_TOBAC;tr|A0A068JFR3|A0A068JFR3_TOBAC;tr|A0A1S3YD20|A0A1S3YD20_TOBAC;tr|A0A077DBL7|A0A077DBL7_TOBAC	tr|A0A1S4CH99|A0A1S4CH99_TOBAC fructokinase-2 OS=Nicotiana tabacum OX=4097 GN=LOC107818999 PE=3 SV=1;tr|A0A1S4CCN8|A0A1S4CCN8_TOBAC fructokinase-2-like OS=Nicotiana tabacum OX=4097 GN=LOC107817420 PE=3 SV=1;tr|A0A068JCD7|A0A068JCD7_TOBAC Fructokinase OS=Ni	2	2	1	6.7	6.7	4	32.668	21739000	54465000	14056000	16573000	72162000	120070000	37890000	27877000	215730000	106720000	145920000	35473000	0	0	0	0	28609000	32954000	25493000	30525000	99223000	32504000	35700000	31509000	4
tr|A0A1S4D0G2|A0A1S4D0G2_TOBAC;tr|A0A068JIB0|A0A068JIB0_TOBAC	tr|A0A1S4D0G2|A0A1S4D0G2_TOBAC Fructose-bisphosphate aldolase OS=Nicotiana tabacum OX=4097 GN=LOC107824494 PE=3 SV=1;tr|A0A068JIB0|A0A068JIB0_TOBAC Fructose-bisphosphate aldolase OS=Nicotiana tabacum OX=4097 PE=2 SV=1	4	2	2	11.1	6.8	6.8	22.749	0	18897000	0	0	32586000	40711000	0	0	270670000	132310000	192600000	16778000	0	0	0	0	0	0	0	0	172140000	44698000	93584000	8800900	8
tr|A0A1S4DFY2|A0A1S4DFY2_TOBAC;tr|A0A075EYP9|A0A075EYP9_TOBAC	tr|A0A1S4DFY2|A0A1S4DFY2_TOBAC translation initiation factor IF-1, chloroplastic-like OS=Nicotiana tabacum OX=4097 GN=LOC107829303 PE=3 SV=1;tr|A0A075EYP9|A0A075EYP9_TOBAC Translation initiation factor IF1 OS=Nicotiana tabacum OX=4097 GN=infA PE=2 SV=1	1	1	1	10.3	10.3	10.3	3.0109	31352000	75614000	17815000	23420000	51618000	160010000	83321000	19237000	51926000	55372000	78389000	21055000	0	0	0	0	0	0	0	0	0	0	0	0	4
tr|A0A1S4BUI2|A0A1S4BUI2_TOBAC;tr|A0A075EZT4|A0A075EZT4_TOBAC;tr|A0A075EYT4|A0A075EYT4_TOBAC	tr|A0A1S4BUI2|A0A1S4BUI2_TOBAC Acyl-coenzyme A oxidase OS=Nicotiana tabacum OX=4097 GN=LOC107812035 PE=3 SV=1;tr|A0A075EZT4|A0A075EZT4_TOBAC Acyl-coenzyme A oxidase OS=Nicotiana tabacum OX=4097 GN=Acx1B PE=2 SV=1;tr|A0A075EYT4|A0A075EYT4_TOBAC Acyl-coenzym	3	3	1	8.1	8.1	2	49.633	199900000	244820000	89306000	102670000	256080000	349450000	164890000	101830000	170150000	208120000	276500000	156500000	119220000	108630000	116800000	114360000	103090000	128670000	120830000	117830000	88320000	76461000	107810000	119470000	20
tr|A0A075F1U5|A0A075F1U5_TOBAC;tr|A0A1S4BXI3|A0A1S4BXI3_TOBAC;tr|A0A1S3YG72|A0A1S3YG72_TOBAC	tr|A0A075F1U5|A0A075F1U5_TOBAC Protein tyrosine phosphatase OS=Nicotiana tabacum OX=4097 GN=ptpkis1 PE=2 SV=1;tr|A0A1S4BXI3|A0A1S4BXI3_TOBAC phosphoglucan phosphatase DSP4, amyloplastic-like OS=Nicotiana tabacum OX=4097 GN=LOC107812930 PE=4 SV=1;tr|A0A1S3Y	5	5	5	18.2	18.2	18.2	23.544	61206000	203620000	81837000	36630000	153720000	280140000	110050000	27674000	173450000	219660000	223320000	104670000	30562000	46981000	52773000	0	48960000	41919000	44968000	34702000	55006000	56540000	61161000	67918000	11
tr|A0A1S4AB88|A0A1S4AB88_TOBAC;tr|A0A1S3YLJ1|A0A1S3YLJ1_TOBAC;tr|A0A075F2H0|A0A075F2H0_TOBAC	tr|A0A1S4AB88|A0A1S4AB88_TOBAC glyoxylate/succinic semialdehyde reductase 1-like OS=Nicotiana tabacum OX=4097 GN=LOC107795700 PE=4 SV=1;tr|A0A1S3YLJ1|A0A1S3YLJ1_TOBAC glyoxylate/succinic semialdehyde reductase 1-like OS=Nicotiana tabacum OX=4097 GN=LOC1077	1	1	1	5.8	5.8	5.8	6.8817	112040000	34218000	0	9996800	27048000	0	0	15638000	18576000	32043000	0	15564000	0	0	0	0	0	0	0	0	0	0	0	0	1
tr|A0A1S4DN02|A0A1S4DN02_TOBAC;tr|A0A075F2H1|A0A075F2H1_TOBAC	tr|A0A1S4DN02|A0A1S4DN02_TOBAC peptidylprolyl isomerase OS=Nicotiana tabacum OX=4097 GN=LOC107831294 PE=4 SV=1;tr|A0A075F2H1|A0A075F2H1_TOBAC peptidylprolyl isomerase OS=Nicotiana tabacum OX=4097 GN=CIP3 PE=2 SV=1	1	1	1	14.3	14.3	14.3	3.3289	0	32391000	16375000	0	20519000	36340000	19800000	12220000	49592000	48803000	37193000	18200000	0	0	0	0	0	0	0	0	0	0	0	0	1
tr|A0A1S4DPL8|A0A1S4DPL8_TOBAC;tr|A0A1S4DCD1|A0A1S4DCD1_TOBAC;tr|A0A1S4AVF1|A0A1S4AVF1_TOBAC;tr|A0A1S4AHJ9|A0A1S4AHJ9_TOBAC;tr|A0A1S3XIN1|A0A1S3XIN1_TOBAC;tr|A0A076FQ13|A0A076FQ13_TOBAC;tr|A0A1S4DPK5|A0A1S4DPK5_TOBAC;tr|A0A076FU26|A0A076FU26_TOBAC;tr|A0A1S4CME4|A0A1S4CME4_TOBAC	tr|A0A1S4DPL8|A0A1S4DPL8_TOBAC nuclear transcription factor Y subunit C-9-like isoform X2 OS=Nicotiana tabacum OX=4097 GN=LOC107832065 PE=4 SV=1;tr|A0A1S4DCD1|A0A1S4DCD1_TOBAC nuclear transcription factor Y subunit C-1-like OS=Nicotiana tabacum OX=4097 GN=	1	1	1	5.7	5.7	5.7	6.7846	19361000	28407000	19758000	10265000	17562000	25751000	20816000	12569000	37693000	26631000	37684000	15119000	0	0	0	0	0	0	0	0	0	0	0	0	13
tr|A0A1S3XT26|A0A1S3XT26_TOBAC;tr|A0A1S3X034|A0A1S3X034_TOBAC;tr|A0A076KWF7|A0A076KWF7_TOBAC;tr|A0A1S4CHV2|A0A1S4CHV2_TOBAC;tr|A0A1S4CHB4|A0A1S4CHB4_TOBAC;tr|A0A1S3ZL94|A0A1S3ZL94_TOBAC;tr|A0A1S4D686|A0A1S4D686_TOBAC;tr|A0A1S4CH21|A0A1S4CH21_TOBAC;tr|A0A1S3YNM4|A0A1S3YNM4_TOBAC;tr|A0A1S3XSZ6|A0A1S3XSZ6_TOBAC;tr|A0A1S4C258|A0A1S4C258_TOBAC;tr|A0A1S4AGS5|A0A1S4AGS5_TOBAC;tr|A0A1S4BMG3|A0A1S4BMG3_TO…	tr|A0A1S3XT26|A0A1S3XT26_TOBAC Alkaline/neutral invertase OS=Nicotiana tabacum OX=4097 GN=LOC107768486 PE=3 SV=1;tr|A0A1S3X034|A0A1S3X034_TOBAC Alkaline/neutral invertase OS=Nicotiana tabacum OX=4097 GN=LOC107759825 PE=3 SV=1;tr|A0A076KWF7|A0A076KWF7_TOBAC	2	2	2	5.6	5.6	5.6	6.5848	73752000	141640000	47364000	52347000	79120000	71221000	53010000	48328000	71305000	73625000	67111000	32390000	0	0	0	0	0	0	0	0	0	0	0	0	3
tr|A0A076L1Y1|A0A076L1Y1_TOBAC;tr|Q5DNZ6|Q5DNZ6_TOBAC;tr|A0A1S3XHK0|A0A1S3XHK0_TOBAC	tr|A0A076L1Y1|A0A076L1Y1_TOBAC Chlorophyll a-b binding protein, chloroplastic OS=Nicotiana tabacum OX=4097 GN=LOC107793205 PE=2 SV=1;tr|Q5DNZ6|Q5DNZ6_TOBAC Chlorophyll a-b binding protein, chloroplastic (Fragment) OS=Nicotiana tabacum OX=4097 PE=2 SV=1;tr|	7	6	1	56.6	49.8	13.6	66.467	2986300000	3485900000	1423000000	1136000000	2394600000	3290200000	891080000	1984700000	4767900000	4240500000	3958100000	1326300000	992190000	499100000	674830000	761120000	618510000	609330000	412210000	1310200000	980020000	913270000	708860000	802380000	67
tr|A0A076L1Z5|A0A076L1Z5_TOBAC;tr|A0A1S4B0Q0|A0A1S4B0Q0_TOBAC	tr|A0A076L1Z5|A0A076L1Z5_TOBAC Remorin 2 OS=Nicotiana tabacum OX=4097 GN=LOC107810092 PE=2 SV=1;tr|A0A1S4B0Q0|A0A1S4B0Q0_TOBAC remorin-like OS=Nicotiana tabacum OX=4097 GN=LOC107803249 PE=3 SV=1	1	1	1	5.2	5.2	5.2	12.535	0	0	129020	0	3149700	6773900	2164400	0	14719000	11072000	13025000	0	0	0	0	0	0	0	0	0	0	0	0	0	4
tr|A0A1S4B8P1|A0A1S4B8P1_TOBAC;tr|A0A076L1Z7|A0A076L1Z7_TOBAC;tr|A0A1S3Y6F3|A0A1S3Y6F3_TOBAC	tr|A0A1S4B8P1|A0A1S4B8P1_TOBAC peptide-methionine (S)-S-oxide reductase OS=Nicotiana tabacum OX=4097 GN=LOC107805741 PE=3 SV=1;tr|A0A076L1Z7|A0A076L1Z7_TOBAC peptide-methionine (S)-S-oxide reductase OS=Nicotiana tabacum OX=4097 GN=LOC107807219 PE=2 SV=1;tr	5	5	5	30	30	30	48.858	333390000	887320000	224040000	216140000	591710000	544980000	253560000	187250000	494390000	531940000	755680000	168580000	123540000	157290000	100790000	140940000	115870000	169560000	133040000	187130000	118890000	110710000	118830000	139820000	25
tr|A0A1S3XFC3|A0A1S3XFC3_TOBAC;tr|A0A1S4D312|A0A1S4D312_TOBAC;tr|A0A1S3ZSD7|A0A1S3ZSD7_TOBAC;tr|A0A076L2E1|A0A076L2E1_TOBAC;tr|A0A1S4B938|A0A1S4B938_TOBAC	tr|A0A1S3XFC3|A0A1S3XFC3_TOBAC Nascent polypeptide-associated complex subunit beta OS=Nicotiana tabacum OX=4097 GN=LOC107764413 PE=3 SV=1;tr|A0A1S4D312|A0A1S4D312_TOBAC Nascent polypeptide-associated complex subunit beta OS=Nicotiana tabacum OX=4097 GN=LOC	4	4	4	46	46	46	15.345	16510000	340600000	31180000	32721000	246740000	328250000	230470000	191270000	712460000	345820000	379550000	157940000	0	138220000	0	0	112570000	118370000	121270000	173080000	335610000	122340000	131830000	141620000	4
tr|A0A076L2E2|A0A076L2E2_TOBAC;tr|A0A1S3ZK73|A0A1S3ZK73_TOBAC	tr|A0A076L2E2|A0A076L2E2_TOBAC 40S ribosomal protein S25 OS=Nicotiana tabacum OX=4097 GN=LOC107768022 PE=2 SV=1;tr|A0A1S3ZK73|A0A1S3ZK73_TOBAC 40S ribosomal protein S25 OS=Nicotiana tabacum OX=4097 GN=LOC107787568 PE=3 SV=1	3	3	3	29.9	29.9	29.9	23.467	1040100000	2699500000	1072900000	907300000	3307900000	1627100000	908130000	500700000	1118500000	1467600000	2511400000	604970000	368690000	1395000000	1607300000	812740000	1397700000	919010000	1270300000	344630000	1191300000	1012800000	1245400000	557640000	43
tr|A0A076L4P6|A0A076L4P6_TOBAC	tr|A0A076L4P6|A0A076L4P6_TOBAC Importin subunit alpha OS=Nicotiana tabacum OX=4097 PE=2 SV=1	7	1	1	18.8	1.3	1.3	2.3902	0	0	0	0	0	0	0	0	18386000	20765000	0	0	0	0	0	0	0	0	0	0	0	0	0	0	1
tr|A9CM20|A9CM20_TOBAC;tr|A0A1S3Z2G1|A0A1S3Z2G1_TOBAC;tr|A0A077D0A9|A0A077D0A9_TOBAC;tr|A0A1S4D637|A0A1S4D637_TOBAC	tr|A9CM20|A9CM20_TOBAC Voltage-dependent anion channel OS=Nicotiana tabacum OX=4097 GN=NtVDAC1 PE=2 SV=1;tr|A0A1S3Z2G1|A0A1S3Z2G1_TOBAC mitochondrial outer membrane protein porin of 34 kDa-like OS=Nicotiana tabacum OX=4097 GN=LOC107782265 PE=3 SV=1;tr|A0A0	5	2	2	26.8	14.5	14.5	7.4246	80480000	66813000	18087000	16177000	24485000	132830000	0	29884000	184070000	142950000	105580000	24067000	0	0	0	0	0	38206000	0	0	0	44751000	0	0	2
tr|A0A077D9N5|A0A077D9N5_TOBAC;tr|A0A1S4DK72|A0A1S4DK72_TOBAC;tr|A0A1S3XJB3|A0A1S3XJB3_TOBAC	tr|A0A077D9N5|A0A077D9N5_TOBAC Glutaredoxin-dependent peroxiredoxin OS=Nicotiana tabacum OX=4097 PE=2 SV=1;tr|A0A1S4DK72|A0A1S4DK72_TOBAC Glutaredoxin-dependent peroxiredoxin OS=Nicotiana tabacum OX=4097 GN=LOC107830577 PE=3 SV=1;tr|A0A1S3XJB3|A0A1S3XJB3_T	2	2	2	14.2	14.2	14.2	3.2311	0	194070000	0	15756000	30033000	178500000	48406000	62768000	53074000	232340000	298250000	50144000	0	0	0	0	0	0	0	0	0	0	0	0	6
tr|A0A077D9P0|A0A077D9P0_TOBAC;tr|A0A1S3YT61|A0A1S3YT61_TOBAC;tr|A0A1S3X5L8|A0A1S3X5L8_TOBAC;tr|A0A1S3Z9G2|A0A1S3Z9G2_TOBAC	tr|A0A077D9P0|A0A077D9P0_TOBAC 40S ribosomal protein S17 OS=Nicotiana tabacum OX=4097 GN=LOC107769059 PE=2 SV=1;tr|A0A1S3YT61|A0A1S3YT61_TOBAC 40S ribosomal protein S17-like OS=Nicotiana tabacum OX=4097 GN=LOC107779419 PE=3 SV=1;tr|A0A1S3X5L8|A0A1S3X5L8_TO	8	8	1	59.7	59.7	11.1	42.457	2025400000	3432500000	1628200000	1362800000	2542500000	3381600000	1772100000	1181300000	2233200000	2315400000	4101500000	1067100000	678570000	572550000	810800000	818260000	550990000	558280000	478010000	644310000	467800000	538040000	785350000	574490000	67
tr|A0A077DBL2|A0A077DBL2_TOBAC;tr|A0A1S4CSL9|A0A1S4CSL9_TOBAC	tr|A0A077DBL2|A0A077DBL2_TOBAC 20 kDa chaperonin, chloroplastic-like OS=Nicotiana tabacum OX=4097 GN=LOC107831277 PE=2 SV=1;tr|A0A1S4CSL9|A0A1S4CSL9_TOBAC 20 kDa chaperonin, chloroplastic-like OS=Nicotiana tabacum OX=4097 GN=LOC107822109 PE=3 SV=1	3	3	3	20.2	20.2	20.2	13.306	49431000	286340000	56384000	39902000	130400000	347840000	108280000	92699000	355120000	388450000	212660000	57241000	45685000	55909000	59118000	52376000	47276000	73359000	65172000	132260000	136970000	73622000	61025000	58912000	11
tr|A0A077DCK3|A0A077DCK3_TOBAC;tr|A0A1S4CH40|A0A1S4CH40_TOBAC;tr|A0A1S4BMH5|A0A1S4BMH5_TOBAC;tr|A0A1S3YK58|A0A1S3YK58_TOBAC;tr|A0A1S3X2P4|A0A1S3X2P4_TOBAC	tr|A0A077DCK3|A0A077DCK3_TOBAC ATP-dependent Clp protease proteolytic subunit OS=Nicotiana tabacum OX=4097 GN=LOC107771859 PE=2 SV=1;tr|A0A1S4CH40|A0A1S4CH40_TOBAC ATP-dependent Clp protease proteolytic subunit OS=Nicotiana tabacum OX=4097 GN=LOC107818763	2	2	2	6.4	6.4	6.4	5.8242	119800000	155650000	66010000	53229000	174290000	155410000	9865800	53052000	166410000	168330000	128740000	78463000	0	0	0	0	94129000	78278000	0	0	0	0	0	0	3
tr|A0A1S3X5I0|A0A1S3X5I0_TOBAC;tr|A0A077DCK9|A0A077DCK9_TOBAC	tr|A0A1S3X5I0|A0A1S3X5I0_TOBAC Carbonic anhydrase OS=Nicotiana tabacum OX=4097 GN=LOC107761423 PE=3 SV=1;tr|A0A077DCK9|A0A077DCK9_TOBAC Carbonic anhydrase OS=Nicotiana tabacum OX=4097 GN=LOC107821152 PE=2 SV=1	4	2	2	22.7	9.7	9.7	6.1386	98007000	26830000	52385000	0	83521000	182380000	0	8157100	217850000	189340000	178920000	0	0	0	0	0	0	0	0	0	0	0	0	0	2
tr|A0A1S3ZYK1|A0A1S3ZYK1_TOBAC;tr|A0A1S3ZYH7|A0A1S3ZYH7_TOBAC;tr|A0A077DCL2|A0A077DCL2_TOBAC;tr|A0A1S4CIT2|A0A1S4CIT2_TOBAC;tr|A0A1S4CIN9|A0A1S4CIN9_TOBAC	tr|A0A1S3ZYK1|A0A1S3ZYK1_TOBAC elongation factor 1-delta 1-like isoform X2 OS=Nicotiana tabacum OX=4097 GN=LOC107791787 PE=3 SV=1;tr|A0A1S3ZYH7|A0A1S3ZYH7_TOBAC elongation factor 1-delta 1-like isoform X1 OS=Nicotiana tabacum OX=4097 GN=LOC107791787 PE=3 S	3	3	3	13.3	13.3	13.3	13.158	21896000	179760000	650650	7348700	60876000	116860000	25841000	11217000	230310000	184990000	148330000	25196000	15547000	27156000	0	0	0	31023000	0	16942000	103070000	81385000	47244000	27077000	14
tr|A0A097BTV9|A0A097BTV9_TOBAC;tr|A0A1S3Z3P5|A0A1S3Z3P5_TOBAC	tr|A0A097BTV9|A0A097BTV9_TOBAC V-type proton ATPase catalytic subunit A OS=Nicotiana tabacum OX=4097 GN=LOC107818091 PE=2 SV=1;tr|A0A1S3Z3P5|A0A1S3Z3P5_TOBAC V-type proton ATPase catalytic subunit A OS=Nicotiana tabacum OX=4097 GN=LOC107782425 PE=3 SV=1	25	1	1	49.6	4	4	43.552	0	0	0	50414000	130150000	203360000	71697000	106600000	224920000	212740000	193430000	106870000	0	0	0	0	0	0	0	0	0	0	0	0	6
tr|A0A097BTZ1|A0A097BTZ1_TOBAC;tr|A0A1S4AVL7|A0A1S4AVL7_TOBAC;tr|A0A1S4BS96|A0A1S4BS96_TOBAC;tr|A0A1S4BSJ5|A0A1S4BSJ5_TOBAC	tr|A0A097BTZ1|A0A097BTZ1_TOBAC ATP-dependent Clp protease proteolytic subunit OS=Nicotiana tabacum OX=4097 PE=2 SV=1;tr|A0A1S4AVL7|A0A1S4AVL7_TOBAC ATP-dependent Clp protease proteolytic subunit OS=Nicotiana tabacum OX=4097 GN=LOC107801881 PE=3 SV=1;tr|A0A	2	2	2	9.9	9.9	9.9	12.373	582420000	759330000	257690000	315360000	854300000	1376300000	414210000	213970000	915870000	899750000	869780000	605750000	341160000	229460000	420230000	443420000	392950000	528500000	266390000	301680000	356260000	361890000	330290000	734230000	31
tr|A0A1S4BY15|A0A1S4BY15_TOBAC;tr|A0A1S3X576|A0A1S3X576_TOBAC;tr|A0A097BU01|A0A097BU01_TOBAC	tr|A0A1S4BY15|A0A1S4BY15_TOBAC 60S ribosomal protein L2, mitochondrial-like OS=Nicotiana tabacum OX=4097 GN=LOC107812987 PE=3 SV=1;tr|A0A1S3X576|A0A1S3X576_TOBAC 60S ribosomal protein L2, mitochondrial-like OS=Nicotiana tabacum OX=4097 GN=LOC107761318 PE=3	1	1	1	6.9	6.9	6.9	2.9227	0	0	0	0	4775300	8903900	3750400	0	5164000	5449400	6250800	0	0	0	0	0	0	0	0	0	0	0	0	0	2
tr|A0A1S3ZS56|A0A1S3ZS56_TOBAC;tr|A0A097BU03|A0A097BU03_TOBAC	tr|A0A1S3ZS56|A0A1S3ZS56_TOBAC universal stress protein A-like protein OS=Nicotiana tabacum OX=4097 GN=LOC107789885 PE=4 SV=1;tr|A0A097BU03|A0A097BU03_TOBAC ER6 protein OS=Nicotiana tabacum OX=4097 GN=LOC107779947 PE=2 SV=1	1	1	1	9.4	9.4	9.4	10.144	60983000	128600000	34425000	36568000	142330000	142630000	61226000	24049000	40692000	106650000	110880000	0	0	0	0	0	0	0	0	0	0	0	0	0	7
tr|A0A0A8JBT3|A0A0A8JBT3_TOBAC;tr|A0A1S4DJL6|A0A1S4DJL6_TOBAC;tr|A0A1S4CA17|A0A1S4CA17_TOBAC	tr|A0A0A8JBT3|A0A0A8JBT3_TOBAC Alpha-L-Arabinofuranosidase/beta-D-Xylopyrianosidase (Fragment) OS=Nicotiana tabacum OX=4097 PE=2 SV=1;tr|A0A1S4DJL6|A0A1S4DJL6_TOBAC beta-xylosidase/alpha-L-arabinofuranosidase 2-like OS=Nicotiana tabacum OX=4097 GN=LOC10783	1	1	1	3.8	3.8	3.8	5.3137	2580300	333060000	20389000	660250	74804000	175930000	0	0	7280800	13012000	82511000	1112400	0	0	0	0	0	0	0	0	0	0	0	0	3
tr|Q8W506|Q8W506_TOBAC;tr|A0A0A8WJI1|A0A0A8WJI1_TOBAC;tr|A0A0A8WH07|A0A0A8WH07_TOBAC	tr|Q8W506|Q8W506_TOBAC Aquaporin OS=Nicotiana tabacum OX=4097 GN=NtPIP2;1 PE=2 SV=1;tr|A0A0A8WJI1|A0A0A8WJI1_TOBAC Aquaporin PIP2 7b OS=Nicotiana tabacum OX=4097 GN=LOC107826207 PE=2 SV=1;tr|A0A0A8WH07|A0A0A8WH07_TOBAC Aquaporin PIP2 7a OS=Nicotiana tabacu	4	2	2	33.1	11.6	11.6	8.895	32409000	44250000	66580	12075000	68467000	116310000	17121000	0	52133000	18764000	18310000	0	0	0	0	0	0	0	0	0	0	0	0	0	6
tr|A0A0A8WHB3|A0A0A8WHB3_TOBAC;tr|A0A1S4D9U1|A0A1S4D9U1_TOBAC;tr|A0A0A8WK73|A0A0A8WK73_TOBAC;tr|A0A1S3Z197|A0A1S3Z197_TOBAC;tr|A0A0A8WH00|A0A0A8WH00_TOBAC;tr|A0A1S4BCD6|A0A1S4BCD6_TOBAC	tr|A0A0A8WHB3|A0A0A8WHB3_TOBAC Aquaporin PIP1 2b OS=Nicotiana tabacum OX=4097 GN=LOC107779998 PE=2 SV=1;tr|A0A1S4D9U1|A0A1S4D9U1_TOBAC Aquaporin PIP1-2t OS=Nicotiana tabacum OX=4097 GN=LOC107827570 PE=2 SV=1;tr|A0A0A8WK73|A0A0A8WK73_TOBAC Aquaporin PIP1 4	2	1	1	17.1	4.9	4.9	12.031	316600000	462210000	180980000	136570000	531710000	490290000	265800000	130930000	557040000	640140000	735010000	125800000	0	0	0	0	0	0	0	0	0	0	0	0	19
tr|A0A0A8WK75|A0A0A8WK75_TOBAC;tr|A0A0A8WHB9|A0A0A8WHB9_TOBAC	tr|A0A0A8WK75|A0A0A8WK75_TOBAC Aquaporin PIP2 6b OS=Nicotiana tabacum OX=4097 GN=LOC107815182 PE=2 SV=1;tr|A0A0A8WHB9|A0A0A8WHB9_TOBAC Aquaporin PIP2 6a OS=Nicotiana tabacum OX=4097 GN=LOC107786743 PE=2 SV=1	4	3	2	31.8	19.4	10.2	9.8006	98259000	523270000	70088000	73760000	99040000	12618000	61064000	57383000	89742000	53156000	66428000	29897000	50192000	138650000	83741000	72586000	0	0	0	84221000	0	0	0	0	5
tr|A0A0A8WK76|A0A0A8WK76_TOBAC	tr|A0A0A8WK76|A0A0A8WK76_TOBAC Aquaporin PIP2 9b OS=Nicotiana tabacum OX=4097 GN=LOC107763243 PE=2 SV=1	4	4	3	21.3	21.3	9.1	113.24	321570000	505540000	270390000	190510000	245810000	242340000	136030000	230050000	385940000	221910000	235840000	111840000	180220000	170880000	195120000	251090000	107870000	105510000	112020000	277400000	162280000	104680000	112930000	118680000	43
tr|A0A1S4BAR2|A0A1S4BAR2_TOBAC;tr|A0A0C4FSU4|A0A0C4FSU4_TOBAC;tr|A0A0C4FST7|A0A0C4FST7_TOBAC;tr|A0A076L4Q6|A0A076L4Q6_TOBAC	tr|A0A1S4BAR2|A0A1S4BAR2_TOBAC betaine aldehyde dehydrogenase, chloroplastic-like OS=Nicotiana tabacum OX=4097 GN=LOC107806351 PE=3 SV=1;tr|A0A0C4FSU4|A0A0C4FSU4_TOBAC BADH2 protein OS=Nicotiana tabacum OX=4097 GN=BADH2 PE=2 SV=1;tr|A0A0C4FST7|A0A0C4FST7_T	2	2	2	5.2	5.2	5.2	12.979	34244000	136030000	55933000	37224000	43478000	137330000	83966000	16519000	247100000	181160000	148200000	32279000	0	0	0	0	0	0	0	0	0	0	0	0	1
tr|Q9ZPL5|Q9ZPL5_TOBAC;tr|A0A0C4Y311|A0A0C4Y311_TOBAC;tr|W8SGH6|W8SGH6_TOBAC;tr|A0A1S4CU66|A0A1S4CU66_TOBAC	tr|Q9ZPL5|Q9ZPL5_TOBAC Cystathionine gamma-synthase OS=Nicotiana tabacum OX=4097 GN=metB PE=1 SV=1;tr|A0A0C4Y311|A0A0C4Y311_TOBAC Nicotiana tabacum cultivar SR1 cystathionine gamma synthase 1 mRNA OS=Nicotiana tabacum OX=4097 GN=LOC107774020 PE=2 SV=1;tr|W	2	2	1	6.3	6.3	4.5	5.1345	35090000	61666000	4288800	21498000	50383000	157460000	79315000	41534000	121020000	133340000	0	16655000	0	0	0	0	0	0	0	0	0	0	0	0	3
tr|A0A1S3Y505|A0A1S3Y505_TOBAC;tr|A0A0I9RJ77|A0A0I9RJ77_TOBAC	tr|A0A1S3Y505|A0A1S3Y505_TOBAC uncharacterized protein LOC107772268 OS=Nicotiana tabacum OX=4097 GN=LOC107772268 PE=3 SV=1;tr|A0A0I9RJ77|A0A0I9RJ77_TOBAC L18 ribosomal protein Heart Stopper OS=Nicotiana tabacum OX=4097 GN=Heart Stopper PE=2 SV=1	1	1	1	7.7	7.7	7.7	4.0974	26434000	139550000	37875000	23512000	69860000	83138000	31639000	11160000	39837000	76998000	63479000	20588000	0	0	0	0	0	0	0	0	0	0	0	0	1
tr|A0A0K0XR34|A0A0K0XR34_TOBAC;tr|A0A1S4D8L2|A0A1S4D8L2_TOBAC;tr|A0A1S4C2Y5|A0A1S4C2Y5_TOBAC	tr|A0A0K0XR34|A0A0K0XR34_TOBAC WD-40 repeat containing protein OS=Nicotiana tabacum OX=4097 GN=ATG18f PE=2 SV=1;tr|A0A1S4D8L2|A0A1S4D8L2_TOBAC autophagy-related protein 18a-like OS=Nicotiana tabacum OX=4097 GN=LOC107827150 PE=4 SV=1;tr|A0A1S4C2Y5|A0A1S4C2Y	1	1	1	4.6	4.6	4.6	5.6893	37631000	0	15555000	12291000	0	58110000	44298000	13300000	0	73285000	107600000	0	0	0	0	0	0	0	0	0	0	0	0	0	1
tr|A0A1S4AA79|A0A1S4AA79_TOBAC;tr|Q4QXM0|Q4QXM0_TOBAC;tr|A0A1S4AA19|A0A1S4AA19_TOBAC;tr|A0A1S3ZM66|A0A1S3ZM66_TOBAC;tr|A0A0K0XR41|A0A0K0XR41_TOBAC	tr|A0A1S4AA79|A0A1S4AA79_TOBAC phosphatidylinositol 3-kinase OS=Nicotiana tabacum OX=4097 GN=LOC107795370 PE=3 SV=1;tr|Q4QXM0|Q4QXM0_TOBAC phosphatidylinositol 3-kinase OS=Nicotiana tabacum OX=4097 GN=PI3K PE=2 SV=1;tr|A0A1S4AA19|A0A1S4AA19_TOBAC phosphati	1	1	1	1.6	1.6	1.6	3.0608	0	0	0	0	0	0	0	0	0	0	0	0	0	0	0	0	0	0	0	0	0	0	0	0	1
tr|A0A0K0XR75|A0A0K0XR75_TOBAC;tr|A0A1S3Y9J9|A0A1S3Y9J9_TOBAC	tr|A0A0K0XR75|A0A0K0XR75_TOBAC Sorting nexin 1-like protein OS=Nicotiana tabacum OX=4097 GN=ATG20 PE=2 SV=1;tr|A0A1S3Y9J9|A0A1S3Y9J9_TOBAC sorting nexin 1 OS=Nicotiana tabacum OX=4097 GN=LOC107774006 PE=4 SV=1	7	7	7	20.4	20.4	20.4	21.769	96473000	362030000	44265000	43868000	182410000	170820000	67316000	84964000	150160000	181600000	293080000	43080000	43420000	67609000	37891000	53253000	45115000	61237000	44186000	53570000	31155000	38431000	67532000	38134000	18
tr|A0A0K2GN10|A0A0K2GN10_TOBAC	tr|A0A0K2GN10|A0A0K2GN10_TOBAC Glyceraldehyde-3-phosphate dehydrogenase OS=Nicotiana tabacum OX=4097 GN=GAPC1 PE=2 SV=1	14	1	1	47.8	8	8	50.855	1321000000	1616600000	792870000	891720000	890360000	752440000	407170000	313760000	746820000	605340000	905970000	536440000	0	0	0	0	0	0	0	0	0	0	0	0	12
tr|Q5M9Z2|Q5M9Z2_TOBAC;tr|A0A172ELU4|A0A172ELU4_TOBAC;tr|A0A0M4JAG7|A0A0M4JAG7_TOBAC	tr|Q5M9Z2|Q5M9Z2_TOBAC NADH-ubiquinone oxidoreductase chain 5 OS=Nicotiana tabacum OX=4097 GN=nad5 PE=3 SV=2;tr|A0A172ELU4|A0A172ELU4_TOBAC NADH-ubiquinone oxidoreductase chain 5 OS=Nicotiana tabacum OX=4097 GN=nad5 PE=3 SV=1;tr|A0A0M4JAG7|A0A0M4JAG7_TOBAC	1	1	1	1.9	1.9	1.9	4.5293	15267000	9935300	0	0	0	17401000	0	12583000	29568000	0	22809000	0	0	0	0	0	0	0	0	0	0	0	0	0	2
tr|A0A6B9D2Y3|A0A6B9D2Y3_TOBAC;tr|A0A1S4EUJ8|A0A1S4EUJ8_TOBAC;tr|A0A172ELU2|A0A172ELU2_TOBAC;tr|A0A0M4JJA2|A0A0M4JJA2_TOBAC;tr|A0A1S4CHY8|A0A1S4CHY8_TOBAC	tr|A0A6B9D2Y3|A0A6B9D2Y3_TOBAC Ribosomal protein S4 (Fragment) OS=Nicotiana tabacum OX=4097 GN=rps4 PE=3 SV=1;tr|A0A1S4EUJ8|A0A1S4EUJ8_TOBAC ribosomal protein S4 OS=Nicotiana tabacum OX=4097 GN=rps4 PE=3 SV=1;tr|A0A172ELU2|A0A172ELU2_TOBAC Ribosomal protei	1	1	1	4.3	4.3	4.3	2.6806	10954000	0	0	4672900	0	47117000	0	4620800	0	0	29041000	0	0	0	0	0	0	0	0	0	0	0	0	0	0
tr|A0A1S3ZWT0|A0A1S3ZWT0_TOBAC;tr|A0A1S3XQG1|A0A1S3XQG1_TOBAC;tr|F8UWS2|F8UWS2_TOBAC;tr|A0A0N7CSC8|A0A0N7CSC8_TOBAC	tr|A0A1S3ZWT0|A0A1S3ZWT0_TOBAC probable carotenoid cleavage dioxygenase 4, chloroplastic OS=Nicotiana tabacum OX=4097 GN=LOC107791323 PE=3 SV=1;tr|A0A1S3XQG1|A0A1S3XQG1_TOBAC probable carotenoid cleavage dioxygenase 4, chloroplastic OS=Nicotiana tabacum OX	4	4	4	8.2	8.2	8.2	7.5891	179830000	278260000	91160000	61371000	169410000	75687000	79495000	18732000	151180000	330200000	306850000	85766000	0	64132000	0	60856000	79472000	0	0	0	55141000	70393000	69655000	0	3
tr|A0A0R4WFE9|A0A0R4WFE9_TOBAC;tr|A0A1S3Y3Y2|A0A1S3Y3Y2_TOBAC;tr|A0A1S3ZUH6|A0A1S3ZUH6_TOBAC	tr|A0A0R4WFE9|A0A0R4WFE9_TOBAC Proteinase inhibitor OS=Nicotiana tabacum OX=4097 GN=PI-1 PE=2 SV=1;tr|A0A1S3Y3Y2|A0A1S3Y3Y2_TOBAC proteinase inhibitor I-B-like OS=Nicotiana tabacum OX=4097 GN=LOC107771920 PE=3 SV=1;tr|A0A1S3ZUH6|A0A1S3ZUH6_TOBAC proteinase	1	1	1	6.2	6.2	6.2	2.9614	42753000	48148000	28583000	30391000	20562000	21688000	0	3280100	15811000	9371200	15497000	10770000	0	0	0	0	0	0	0	0	0	0	0	0	4
tr|A0A0S0N610|A0A0S0N610_TOBAC	tr|A0A0S0N610|A0A0S0N610_TOBAC Tubulin beta chain OS=Nicotiana tabacum OX=4097 GN=TUB1 PE=2 SV=1	24	6	4	70.4	17.8	10.4	98.571	2485900000	6422300000	2067000000	1609100000	3288800000	5801800000	2764200000	1118100000	3596700000	4496400000	4178300000	1794000000	1035800000	1086900000	1393300000	1232400000	1011600000	963440000	971880000	830790000	729760000	941530000	885180000	1042500000	63
tr|A0A1S3YYR6|A0A1S3YYR6_TOBAC;tr|A0A0S0N6E8|A0A0S0N6E8_TOBAC;tr|A0A1S3XCD2|A0A1S3XCD2_TOBAC	tr|A0A1S3YYR6|A0A1S3YYR6_TOBAC Tubulin beta chain OS=Nicotiana tabacum OX=4097 GN=LOC107781181 PE=3 SV=1;tr|A0A0S0N6E8|A0A0S0N6E8_TOBAC Tubulin beta chain OS=Nicotiana tabacum OX=4097 GN=TUB8 PE=2 SV=1;tr|A0A1S3XCD2|A0A1S3XCD2_TOBAC Tubulin beta chain OS=N	23	1	1	71.2	6.1	6.1	7.9068	0	145080000	42085000	21710000	42562000	31894000	37395000	0	67631000	52887000	0	17761000	0	0	0	0	0	0	0	0	0	0	0	0	1
tr|A0A139ZSG9|A0A139ZSG9_TOBAC	tr|A0A139ZSG9|A0A139ZSG9_TOBAC 6-phosphogluconate dehydrogenase, decarboxylating OS=Nicotiana tabacum OX=4097 GN=LOC107779182 PE=2 SV=1	7	7	4	25.4	25.4	14.7	80.714	188380000	453240000	64634000	120840000	239770000	683780000	148280000	205540000	833560000	616910000	841460000	241110000	72882000	47345000	57190000	83875000	61822000	63280000	81803000	121680000	149550000	102550000	86742000	124230000	26
tr|A0A140G1P7|A0A140G1P7_TOBAC	tr|A0A140G1P7|A0A140G1P7_TOBAC ATP synthase subunit alpha OS=Nicotiana tabacum OX=4097 GN=atpA PE=3 SV=1	22	1	1	59.4	2.6	2.6	4.7336	508730000	991580000	265200000	326250000	1513100000	1076600000	735320000	474900000	1056100000	1325100000	1481900000	552380000	368630000	350660000	309780000	407440000	679820000	358960000	481050000	596450000	456050000	505550000	477700000	601070000	74
tr|A0A140G1S2|A0A140G1S2_TOBAC;sp|P00826|ATPB_TOBAC;tr|Q71V35|Q71V35_TOBAC	tr|A0A140G1S2|A0A140G1S2_TOBAC ATP synthase subunit beta OS=Nicotiana tabacum OX=4097 GN=atpB PE=3 SV=1;sp|P00826|ATPB_TOBAC ATP synthase subunit beta, chloroplastic OS=Nicotiana tabacum OX=4097 GN=atpB PE=3 SV=1;tr|Q71V35|Q71V35_TOBAC ATP synthase subunit	26	26	24	81.1	81.1	76.5	323.31	14970000000	19729000000	9006200000	8648600000	11721000000	22050000000	9600500000	9046600000	24126000000	24783000000	23700000000	7526900000	2702200000	2049000000	2918500000	3130000000	1532700000	2019400000	1616800000	3324400000	2505600000	2210100000	2221600000	2506400000	448
tr|A0A140G1T2|A0A140G1T2_TOBAC	tr|A0A140G1T2|A0A140G1T2_TOBAC Cytochrome b559 subunit beta OS=Nicotiana tabacum OX=4097 GN=psbF PE=3 SV=1	4	4	4	97.4	97.4	97.4	96.031	453040000	792860000	119290000	182730000	66188000	322780000	151050000	439430000	642920000	115030000	389120000	124960000	193120000	123970000	87269000	170930000	0	53450000	80684000	509260000	230530000	72342000	126790000	133600000	36
tr|A0A172ELT8|A0A172ELT8_TOBAC;tr|Q5M9V8|Q5M9V8_TOBAC;tr|A0A0M4K692|A0A0M4K692_TOBAC	tr|A0A172ELT8|A0A172ELT8_TOBAC H(+)-transporting two-sector ATPase OS=Nicotiana tabacum OX=4097 GN=orfB PE=3 SV=1;tr|Q5M9V8|Q5M9V8_TOBAC H(+)-transporting two-sector ATPase OS=Nicotiana tabacum OX=4097 GN=orfB PE=3 SV=2;tr|A0A0M4K692|A0A0M4K692_TOBAC H(+)-	2	2	2	12.8	12.8	12.8	5.869	107060000	233720000	50819000	59723000	145880000	387500000	110270000	47907000	222080000	482310000	395500000	70858000	103890000	0	0	88058000	99668000	194260000	105580000	105450000	123030000	167900000	105840000	107800000	13
tr|A0A1S3XJN0|A0A1S3XJN0_TOBAC;tr|A0A1C8FVK7|A0A1C8FVK7_TOBAC;tr|A0A1C8FVJ5|A0A1C8FVJ5_TOBAC	tr|A0A1S3XJN0|A0A1S3XJN0_TOBAC eukaryotic translation initiation factor 2 subunit alpha-like OS=Nicotiana tabacum OX=4097 GN=LOC107765718 PE=3 SV=1;tr|A0A1C8FVK7|A0A1C8FVK7_TOBAC Eukaryotic translation initiation factor 2 subunit alpha OS=Nicotiana tabacum	3	3	3	11.4	11.4	11.4	11.183	65292000	123230000	29204000	14665000	121460000	108220000	27702000	16755000	87477000	115530000	153440000	39040000	11883000	0	0	0	0	45092000	0	0	43156000	49000000	49089000	0	5
tr|A0A1S3WX25|A0A1S3WX25_TOBAC;tr|O65855|O65855_TOBAC;tr|A0A1S4DMZ3|A0A1S4DMZ3_TOBAC;tr|O65854|O65854_TOBAC	tr|A0A1S3WX25|A0A1S3WX25_TOBAC Glucose-6-phosphate 1-dehydrogenase OS=Nicotiana tabacum OX=4097 GN=LOC107758909 PE=3 SV=1;tr|O65855|O65855_TOBAC Glucose-6-phosphate 1-dehydrogenase OS=Nicotiana tabacum OX=4097 PE=2 SV=1;tr|A0A1S4DMZ3|A0A1S4DMZ3_TOBAC Gluco	7	7	7	19.4	19.4	19.4	93.776	408710000	813490000	205710000	167850000	531020000	580610000	289980000	127840000	763980000	548320000	639460000	183100000	176350000	159120000	143320000	138950000	130590000	106260000	82618000	112600000	167910000	134000000	123840000	140550000	36
tr|D9IP68|D9IP68_TOBAC;tr|A0A1S4AZE8|A0A1S4AZE8_TOBAC;tr|A0A1S4CTN7|A0A1S4CTN7_TOBAC;tr|A0A1S4BRK5|A0A1S4BRK5_TOBAC;tr|A0A1S4ALQ4|A0A1S4ALQ4_TOBAC;tr|A0A1S3ZRK5|A0A1S3ZRK5_TOBAC;tr|A0A1S3YSK8|A0A1S3YSK8_TOBAC;tr|A0A1S4C608|A0A1S4C608_TOBAC;tr|A0A1S4DI88|A0A1S4DI88_TOBAC;tr|A0A1S3Z5K8|A0A1S3Z5K8_TOBAC;tr|A0A1S3ZBH7|A0A1S3ZBH7_TOBAC;tr|A0A1S4CV16|A0A1S4CV16_TOBAC;tr|A0A1S4BVU7|A0A1S4BVU7_TOBAC;tr|A…	tr|D9IP68|D9IP68_TOBAC Pto-like protein (Fragment) OS=Nicotiana tabacum OX=4097 PE=2 SV=1;tr|A0A1S4AZE8|A0A1S4AZE8_TOBAC probable receptor-like protein kinase At5g61350 OS=Nicotiana tabacum OX=4097 GN=LOC107802828 PE=4 SV=1;tr|A0A1S4CTN7|A0A1S4CTN7_TOBAC p	1	1	1	12	12	12	2.7837	26470000	0	12855000	13669000	0	35004000	0	16262000	28214000	46667000	34489000	13214000	0	0	0	0	0	0	0	0	0	0	0	0	1
tr|A0A1S3WXP0|A0A1S3WXP0_TOBAC;tr|A0A1S4APM0|A0A1S4APM0_TOBAC;tr|A0A1S4CZX6|A0A1S4CZX6_TOBAC;tr|A0A1S3YUC2|A0A1S3YUC2_TOBAC	tr|A0A1S3WXP0|A0A1S3WXP0_TOBAC Serine hydroxymethyltransferase OS=Nicotiana tabacum OX=4097 GN=LOC107759094 PE=3 SV=1;tr|A0A1S4APM0|A0A1S4APM0_TOBAC Serine hydroxymethyltransferase OS=Nicotiana tabacum OX=4097 GN=LOC107799799 PE=3 SV=1;tr|A0A1S4CZX6|A0A1S4	4	4	4	11.4	11.4	11.4	19.858	108290000	85696000	69740000	51610000	349070000	170740000	180420000	76323000	292250000	289230000	362470000	140450000	0	0	0	79219000	0	121750000	90785000	81383000	100240000	63759000	0	91613000	8
tr|A0A1S4DBZ0|A0A1S4DBZ0_TOBAC;tr|A0A1S3WXP6|A0A1S3WXP6_TOBAC	tr|A0A1S4DBZ0|A0A1S4DBZ0_TOBAC Methyltransferase OS=Nicotiana tabacum OX=4097 GN=LOC107828173 PE=3 SV=1;tr|A0A1S3WXP6|A0A1S3WXP6_TOBAC Methyltransferase OS=Nicotiana tabacum OX=4097 GN=LOC107759039 PE=3 SV=1	3	3	3	5.3	5.3	5.3	7.1898	76232000	66233000	20939000	25588000	39339000	164370000	81774000	18911000	50423000	94869000	108430000	27425000	0	0	0	0	39230000	42436000	35685000	0	29329000	39403000	28921000	0	9
tr|A0A1S3WXW3|A0A1S3WXW3_TOBAC;tr|A0A1S3WYC4|A0A1S3WYC4_TOBAC	tr|A0A1S3WXW3|A0A1S3WXW3_TOBAC SPX domain-containing membrane protein At4g22990-like isoform X2 OS=Nicotiana tabacum OX=4097 GN=LOC107759148 PE=3 SV=1;tr|A0A1S3WYC4|A0A1S3WYC4_TOBAC SPX domain-containing membrane protein At4g22990-like isoform X1 OS=Nicoti	1	1	1	2	2	2	16.32	9258800	32655000	6673200	5497500	15747000	0	0	0	0	18033000	0	0	0	0	0	0	0	0	0	0	0	0	0	0	1
tr|A0A1S3ZYL7|A0A1S3ZYL7_TOBAC;tr|A0A1S3WXZ7|A0A1S3WXZ7_TOBAC	tr|A0A1S3ZYL7|A0A1S3ZYL7_TOBAC Exocyst complex component Sec8 OS=Nicotiana tabacum OX=4097 GN=LOC107791768 PE=3 SV=1;tr|A0A1S3WXZ7|A0A1S3WXZ7_TOBAC Exocyst complex component Sec8 OS=Nicotiana tabacum OX=4097 GN=LOC107758906 PE=3 SV=1	2	2	2	4.4	4.4	4.4	19.29	77223000	75818000	18098000	8572700	24411000	60512000	52005000	83459000	109100000	35671000	141380000	60358000	37984000	16636000	0	0	0	13117000	26385000	59728000	27125000	15531000	42371000	0	10
tr|A0A1S3WY31|A0A1S3WY31_TOBAC	tr|A0A1S3WY31|A0A1S3WY31_TOBAC 60S ribosomal protein L35-like OS=Nicotiana tabacum OX=4097 GN=LOC107759229 PE=3 SV=1	3	3	1	18.7	18.7	8.1	67.94	747410000	843200000	522710000	497250000	1429500000	1237200000	758940000	348340000	1157000000	950530000	1145000000	446540000	498540000	240820000	680370000	685100000	609290000	373450000	502320000	430330000	472070000	322400000	301310000	477830000	36
tr|A0A1S3XVM3|A0A1S3XVM3_TOBAC;tr|A0A1S3WYA8|A0A1S3WYA8_TOBAC	tr|A0A1S3XVM3|A0A1S3XVM3_TOBAC 20 kDa chaperonin, chloroplastic-like OS=Nicotiana tabacum OX=4097 GN=LOC107769079 PE=3 SV=1;tr|A0A1S3WYA8|A0A1S3WYA8_TOBAC 20 kDa chaperonin, chloroplastic-like OS=Nicotiana tabacum OX=4097 GN=LOC107759119 PE=3 SV=1	3	3	3	21	21	21	14.105	0	243900000	43968000	19054000	61567000	171470000	0	14741000	142240000	170310000	245900000	25471000	0	50554000	0	0	36653000	57089000	0	0	48912000	46458000	54665000	0	5
tr|A0A1S3WYG1|A0A1S3WYG1_TOBAC;tr|A0A1S4CRJ1|A0A1S4CRJ1_TOBAC	tr|A0A1S3WYG1|A0A1S3WYG1_TOBAC 60S ribosomal protein L22-3-like OS=Nicotiana tabacum OX=4097 GN=LOC107759189 PE=3 SV=1;tr|A0A1S4CRJ1|A0A1S4CRJ1_TOBAC 60S ribosomal protein L22-3-like OS=Nicotiana tabacum OX=4097 GN=LOC107821754 PE=3 SV=1	6	6	3	48.8	48.8	25.6	59.935	526590000	1190200000	348030000	760970000	1336300000	1639500000	820250000	604460000	1136200000	2820900000	4096900000	432810000	360360000	450090000	514430000	394500000	425580000	451820000	515740000	399610000	425230000	390750000	523030000	390300000	51
tr|A0A1S3WYM6|A0A1S3WYM6_TOBAC;sp|P93374|ACT2_TOBAC;tr|A0A1S4CAD2|A0A1S4CAD2_TOBAC;tr|A0A1S4ACM6|A0A1S4ACM6_TOBAC	tr|A0A1S3WYM6|A0A1S3WYM6_TOBAC actin-101 OS=Nicotiana tabacum OX=4097 GN=LOC107759349 PE=3 SV=1;sp|P93374|ACT2_TOBAC Actin-53 (Fragment) OS=Nicotiana tabacum OX=4097 PE=3 SV=1;tr|A0A1S4CAD2|A0A1S4CAD2_TOBAC actin-53 OS=Nicotiana tabacum OX=4097 GN=LOC10781	14	1	1	48.5	5.6	5.6	-2	0	0	0	0	0	0	0	0	0	0	0	76104000	0	0	0	0	0	0	0	0	0	0	0	0	1
tr|A0A1S4AX47|A0A1S4AX47_TOBAC;tr|A0A1S4BQG6|A0A1S4BQG6_TOBAC;tr|A0A1S3WYM9|A0A1S3WYM9_TOBAC;tr|A0A1S4BG98|A0A1S4BG98_TOBAC;tr|A0A1S4AWU8|A0A1S4AWU8_TOBAC	tr|A0A1S4AX47|A0A1S4AX47_TOBAC zinc finger CCCH domain-containing protein 49-like isoform X2 OS=Nicotiana tabacum OX=4097 GN=LOC107802168 PE=4 SV=1;tr|A0A1S4BQG6|A0A1S4BQG6_TOBAC zinc finger CCCH domain-containing protein 49-like OS=Nicotiana tabacum OX=40	2	2	2	6.8	6.8	6.8	8.3932	2459900	30785000	87024000	0	10581000	77397000	66555000	28050000	17234000	65998000	82500000	37254000	0	0	0	0	0	27073000	0	0	0	27475000	0	0	2
tr|A0A1S4CHX2|A0A1S4CHX2_TOBAC;tr|A0A1S3WYR5|A0A1S3WYR5_TOBAC;tr|A0A1S3WYZ3|A0A1S3WYZ3_TOBAC	tr|A0A1S4CHX2|A0A1S4CHX2_TOBAC uncharacterized protein LOC107819190 OS=Nicotiana tabacum OX=4097 GN=LOC107819190 PE=4 SV=1;tr|A0A1S3WYR5|A0A1S3WYR5_TOBAC extensin-like isoform X2 OS=Nicotiana tabacum OX=4097 GN=LOC107759431 PE=4 SV=1;tr|A0A1S3WYZ3|A0A1S3WY	1	1	1	7.1	7.1	7.1	2.9489	30734000	27964000	30737000	0	51544000	39079000	30556000	20286000	26240000	0	39922000	24175000	0	0	0	0	0	0	0	0	0	0	0	0	3
tr|A0A1S3ZX13|A0A1S3ZX13_TOBAC;tr|A0A1S3WYR8|A0A1S3WYR8_TOBAC	tr|A0A1S3ZX13|A0A1S3ZX13_TOBAC Fructose-bisphosphate aldolase OS=Nicotiana tabacum OX=4097 GN=LOC107791431 PE=3 SV=1;tr|A0A1S3WYR8|A0A1S3WYR8_TOBAC Fructose-bisphosphate aldolase OS=Nicotiana tabacum OX=4097 GN=LOC107759369 PE=3 SV=1	6	1	1	24.7	7.8	7.8	25.618	63365000	32858000	30377000	29053000	0	67265000	21382000	33028000	64818000	23701000	80695000	47474000	0	0	0	0	0	0	0	0	0	0	0	0	1
tr|A0A1S4CQF3|A0A1S4CQF3_TOBAC;tr|A0A1S4DHD1|A0A1S4DHD1_TOBAC;tr|A0A1S3WYT7|A0A1S3WYT7_TOBAC;tr|A0A1S3XP33|A0A1S3XP33_TOBAC;tr|A0A1S4DHB0|A0A1S4DHB0_TOBAC;tr|A0A1S3WZ42|A0A1S3WZ42_TOBAC	tr|A0A1S4CQF3|A0A1S4CQF3_TOBAC probable ribosomal protein S11, mitochondrial OS=Nicotiana tabacum OX=4097 GN=LOC107821542 PE=3 SV=1;tr|A0A1S4DHD1|A0A1S4DHD1_TOBAC probable ribosomal protein S11, mitochondrial isoform X2 OS=Nicotiana tabacum OX=4097 GN=LOC1	2	2	2	11.2	11.2	11.2	8.6418	13052000	0	87245	6201300	25763000	41883000	19415000	4753900	8750100	44095000	34765000	6951600	0	0	0	0	11327000	12742000	11913000	0	9996500	15348000	10839000	0	13
tr|A0A1S3WYZ9|A0A1S3WYZ9_TOBAC	tr|A0A1S3WYZ9|A0A1S3WYZ9_TOBAC abscisic-aldehyde oxidase-like OS=Nicotiana tabacum OX=4097 GN=LOC107759354 PE=4 SV=1	1	1	1	3.1	3.1	3.1	54.209	110810000	107310000	79080000	49171000	159890000	137230000	167990000	78644000	98931000	105800000	150020000	84392000	0	0	0	0	0	0	0	0	0	0	0	0	12
tr|A0A1S3WZ09|A0A1S3WZ09_TOBAC;tr|A0A1S4BX27|A0A1S4BX27_TOBAC;tr|A0A1S4AG75|A0A1S4AG75_TOBAC	tr|A0A1S3WZ09|A0A1S3WZ09_TOBAC 60S ribosomal protein L30-like OS=Nicotiana tabacum OX=4097 GN=LOC107759448 PE=3 SV=1;tr|A0A1S4BX27|A0A1S4BX27_TOBAC 60S ribosomal protein L30-like OS=Nicotiana tabacum OX=4097 GN=LOC107812690 PE=3 SV=1;tr|A0A1S4AG75|A0A1S4AG	4	2	2	35.4	24.8	24.8	7.5886	167560000	330880000	90207000	89744000	328890000	314650000	105460000	68989000	188880000	183020000	221670000	63860000	135490000	126360000	123890000	128480000	136710000	137030000	107960000	0	115810000	0	126750000	118440000	4
tr|A0A1S3ZEB6|A0A1S3ZEB6_TOBAC;tr|A0A1S3WZ25|A0A1S3WZ25_TOBAC	tr|A0A1S3ZEB6|A0A1S3ZEB6_TOBAC uncharacterized protein LOC107785899 OS=Nicotiana tabacum OX=4097 GN=LOC107785899 PE=4 SV=1;tr|A0A1S3WZ25|A0A1S3WZ25_TOBAC uncharacterized protein LOC107759515 OS=Nicotiana tabacum OX=4097 GN=LOC107759515 PE=4 SV=1	1	1	1	5	5	5	-2	142960000	7212900000	2365900000	1699800000	7084300000	4300200000	6091000000	1551400000	5491500000	7310100000	11961000000	1520700000	0	0	0	0	0	1410500000	0	0	0	2891900000	0	0	2
tr|A0A1S3YWM6|A0A1S3YWM6_TOBAC;tr|A0A1S3WZ46|A0A1S3WZ46_TOBAC;tr|Q9SNY2|Q9SNY2_TOBAC;tr|Q8H1T6|Q8H1T6_TOBAC	tr|A0A1S3YWM6|A0A1S3YWM6_TOBAC Phospholipase D OS=Nicotiana tabacum OX=4097 GN=LOC107780667 PE=3 SV=1;tr|A0A1S3WZ46|A0A1S3WZ46_TOBAC Phospholipase D OS=Nicotiana tabacum OX=4097 GN=LOC107759472 PE=3 SV=1;tr|Q9SNY2|Q9SNY2_TOBAC phospholipase D (Fragment) OS	3	3	3	5.2	5.2	5.2	10.209	298760000	218550000	217970000	151830000	221250000	130260000	37598000	7817000	214570000	286550000	338950000	161690000	183960000	81829000	146290000	190950000	106690000	66113000	0	0	86668000	100800000	106640000	147040000	15
tr|A0A1S3XC26|A0A1S3XC26_TOBAC;tr|A0A1S3XC11|A0A1S3XC11_TOBAC;tr|A0A1S3XCB9|A0A1S3XCB9_TOBAC;tr|A0A1S3WZ96|A0A1S3WZ96_TOBAC;tr|A0A1S3WZ94|A0A1S3WZ94_TOBAC	tr|A0A1S3XC26|A0A1S3XC26_TOBAC RNA helicase OS=Nicotiana tabacum OX=4097 GN=LOC107763499 PE=4 SV=1;tr|A0A1S3XC11|A0A1S3XC11_TOBAC RNA helicase OS=Nicotiana tabacum OX=4097 GN=LOC107763499 PE=4 SV=1;tr|A0A1S3XCB9|A0A1S3XCB9_TOBAC RNA helicase OS=Nicotiana t	1	1	1	2.8	2.8	2.8	-2	182410000	0	0	0	0	0	22551000	0	116810000	83891000	127770000	0	0	0	0	0	0	0	0	0	0	0	0	0	1
tr|A0A1S4C1K4|A0A1S4C1K4_TOBAC;tr|A0A1S3WZA4|A0A1S3WZA4_TOBAC	tr|A0A1S4C1K4|A0A1S4C1K4_TOBAC ATP synthase subunit O, mitochondrial-like OS=Nicotiana tabacum OX=4097 GN=LOC107814191 PE=3 SV=1;tr|A0A1S3WZA4|A0A1S3WZA4_TOBAC ATP synthase subunit O, mitochondrial-like OS=Nicotiana tabacum OX=4097 GN=LOC107759517 PE=3 SV=	1	1	1	6.7	6.7	6.7	4.8833	97780000	65520000	72847000	62810000	55434000	106970000	65022000	63311000	172550000	103180000	95537000	61533000	0	0	0	0	0	0	0	0	0	0	0	0	10
tr|A0A1S4C4T3|A0A1S4C4T3_TOBAC;tr|A0A1S3YTX5|A0A1S3YTX5_TOBAC;tr|A0A1S4DHE4|A0A1S4DHE4_TOBAC;tr|A0A1S4DGT0|A0A1S4DGT0_TOBAC;tr|A0A1S3YJ76|A0A1S3YJ76_TOBAC;tr|A0A1S3YIY5|A0A1S3YIY5_TOBAC;tr|A0A1S3WZE6|A0A1S3WZE6_TOBAC;tr|A0A1S4BJR7|A0A1S4BJR7_TOBAC;tr|A0A1S3YMT6|A0A1S3YMT6_TOBAC;tr|Q9ZS49|Q9ZS49_TOBAC;tr|A0A1S3X6G3|A0A1S3X6G3_TOBAC;tr|A0A1S3YIE5|A0A1S3YIE5_TOBAC;tr|A0A1S3X6E3|A0A1S3X6E3_TOBAC;tr|A…	tr|A0A1S4C4T3|A0A1S4C4T3_TOBAC Hexosyltransferase OS=Nicotiana tabacum OX=4097 GN=LOC107815141 PE=3 SV=1;tr|A0A1S3YTX5|A0A1S3YTX5_TOBAC Hexosyltransferase OS=Nicotiana tabacum OX=4097 GN=LOC107779654 PE=3 SV=1;tr|A0A1S4DHE4|A0A1S4DHE4_TOBAC Hexosyltransfer	1	1	1	2.5	2.5	2.5	2.9036	5057200	0	0	4109700	0	13129000	8063600	1386400	0	15549000	24675000	0	0	0	0	0	0	0	0	0	0	0	0	0	2
tr|A0A1S3WZJ1|A0A1S3WZJ1_TOBAC	tr|A0A1S3WZJ1|A0A1S3WZJ1_TOBAC Purple acid phosphatase OS=Nicotiana tabacum OX=4097 GN=LOC107759506 PE=3 SV=1	2	1	1	4.2	2.6	2.6	4.4619	36800000	22771000	0	0	60940000	0	0	0	60611000	0	0	43349000	0	0	0	0	0	0	0	0	0	0	0	0	2
tr|A0A1S3WZM6|A0A1S3WZM6_TOBAC;tr|A0A1S4BIX1|A0A1S4BIX1_TOBAC	tr|A0A1S3WZM6|A0A1S3WZM6_TOBAC premnaspirodiene oxygenase-like OS=Nicotiana tabacum OX=4097 GN=LOC107759533 PE=3 SV=1;tr|A0A1S4BIX1|A0A1S4BIX1_TOBAC premnaspirodiene oxygenase-like OS=Nicotiana tabacum OX=4097 GN=LOC107808734 PE=3 SV=1	3	2	1	8.4	6.2	4.4	8.0756	82660000	204970000	41336000	42548000	119080000	104740000	37052000	18014000	88252000	90147000	121670000	31138000	0	0	0	0	52914000	45300000	41102000	0	0	0	47899000	0	4
tr|A0A1S4DC28|A0A1S4DC28_TOBAC;tr|A0A1S3X053|A0A1S3X053_TOBAC;tr|A0A1S3WZM7|A0A1S3WZM7_TOBAC;tr|A0A1S4DC59|A0A1S4DC59_TOBAC	tr|A0A1S4DC28|A0A1S4DC28_TOBAC glutathionyl-hydroquinone reductase YqjG-like isoform X2 OS=Nicotiana tabacum OX=4097 GN=LOC107828221 PE=4 SV=1;tr|A0A1S3X053|A0A1S3X053_TOBAC glutathionyl-hydroquinone reductase YqjG-like isoform X2 OS=Nicotiana tabacum OX=4	1	1	1	3.7	3.7	3.7	2.8614	0	0	0	0	0	0	54385000	0	0	0	0	28616000	0	0	0	0	0	0	0	0	0	0	0	0	2
tr|A0A1S4D3F6|A0A1S4D3F6_TOBAC;tr|A0A1S3WZQ8|A0A1S3WZQ8_TOBAC;tr|A0A1S3YIZ0|A0A1S3YIZ0_TOBAC	tr|A0A1S4D3F6|A0A1S4D3F6_TOBAC Aconitate hydratase OS=Nicotiana tabacum OX=4097 GN=LOC107825601 PE=3 SV=1;tr|A0A1S3WZQ8|A0A1S3WZQ8_TOBAC Aconitate hydratase OS=Nicotiana tabacum OX=4097 GN=LOC107759563 PE=3 SV=1;tr|A0A1S3YIZ0|A0A1S3YIZ0_TOBAC Aconitate hyd	7	7	4	11.6	11.6	7.1	32.833	232440000	379850000	98811000	114470000	309820000	445430000	268000000	140170000	610010000	616560000	592240000	190230000	54022000	69086000	58730000	47299000	77297000	71532000	105530000	67232000	152730000	115380000	118930000	88339000	28
tr|A0A1S3WZX1|A0A1S3WZX1_TOBAC;tr|A0A1S4BU79|A0A1S4BU79_TOBAC	tr|A0A1S3WZX1|A0A1S3WZX1_TOBAC elongation factor 1-beta-like OS=Nicotiana tabacum OX=4097 GN=LOC107759618 PE=3 SV=1;tr|A0A1S4BU79|A0A1S4BU79_TOBAC elongation factor 1-beta-like OS=Nicotiana tabacum OX=4097 GN=LOC107811954 PE=3 SV=1	3	3	3	18.1	18.1	18.1	29.006	56088000	191090000	38448000	27312000	75799000	36183000	27753000	32357000	351480000	181480000	152920000	46866000	38751000	23102000	10274000	36449000	38537000	0	0	30907000	155930000	52319000	87766000	34397000	9
tr|A0A1S3WZZ3|A0A1S3WZZ3_TOBAC	tr|A0A1S3WZZ3|A0A1S3WZZ3_TOBAC alpha-glucosidase-like OS=Nicotiana tabacum OX=4097 GN=LOC107759721 PE=3 SV=1	3	3	1	4.1	4.1	0.9	15.953	202480000	401010000	163520000	60398000	463960000	671960000	275290000	152500000	562990000	665510000	898630000	193870000	129620000	120800000	154970000	151180000	164730000	176540000	141480000	136210000	183280000	192520000	236080000	157300000	20
tr|A0A1S3XG19|A0A1S3XG19_TOBAC;tr|A0A1S3X040|A0A1S3X040_TOBAC	tr|A0A1S3XG19|A0A1S3XG19_TOBAC adenine phosphoribosyltransferase OS=Nicotiana tabacum OX=4097 GN=LOC107764701 PE=3 SV=1;tr|A0A1S3X040|A0A1S3X040_TOBAC adenine phosphoribosyltransferase OS=Nicotiana tabacum OX=4097 GN=LOC107759759 PE=3 SV=1	2	1	1	13.9	8.4	8.4	3.9301	28903000	19269000	24720000	18938000	23220000	44780000	22503000	16714000	44255000	32648000	63202000	24141000	0	0	0	0	0	0	0	0	0	0	0	0	2
tr|A0A1S3X073|A0A1S3X073_TOBAC	tr|A0A1S3X073|A0A1S3X073_TOBAC phosphoglycolate phosphatase 1B, chloroplastic-like OS=Nicotiana tabacum OX=4097 GN=LOC107759700 PE=4 SV=1	4	4	4	14.7	14.7	14.7	9.5894	193810000	286350000	157500000	21010000	219870000	290190000	188460000	82195000	564940000	377740000	502350000	50808000	92937000	108830000	100260000	0	0	99684000	85056000	140220000	160050000	124110000	134720000	94261000	10
tr|A0A1S4C023|A0A1S4C023_TOBAC;tr|A0A1S4APK5|A0A1S4APK5_TOBAC;tr|A0A1S3YCS7|A0A1S3YCS7_TOBAC;tr|A0A1S3Y0E6|A0A1S3Y0E6_TOBAC;tr|A0A1S3XQ54|A0A1S3XQ54_TOBAC;tr|A0A1S3X077|A0A1S3X077_TOBAC;tr|A0A1S4BZS6|A0A1S4BZS6_TOBAC;tr|A0A1S3XQB5|A0A1S3XQB5_TOBAC	tr|A0A1S4C023|A0A1S4C023_TOBAC DEAD-box ATP-dependent RNA helicase 56-like isoform X1 OS=Nicotiana tabacum OX=4097 GN=LOC107813637 PE=4 SV=1;tr|A0A1S4APK5|A0A1S4APK5_TOBAC DEAD-box ATP-dependent RNA helicase 56-like OS=Nicotiana tabacum OX=4097 GN=LOC10780	2	2	2	4.7	4.7	4.7	5.3956	71715000	220050000	46602000	28957000	80601000	180860000	74286000	37485000	155390000	122950000	306550000	50080000	43527000	78374000	44829000	35184000	38262000	81427000	47301000	46292000	57171000	55100000	63971000	49198000	12
tr|A0A1S3ZJ45|A0A1S3ZJ45_TOBAC;tr|A0A1S3X0C4|A0A1S3X0C4_TOBAC	tr|A0A1S3ZJ45|A0A1S3ZJ45_TOBAC serine/threonine-protein phosphatase 2A 65 kDa regulatory subunit A beta isoform-like OS=Nicotiana tabacum OX=4097 GN=LOC107787439 PE=4 SV=1;tr|A0A1S3X0C4|A0A1S3X0C4_TOBAC serine/threonine-protein phosphatase 2A 65 kDa regula	2	1	1	7.6	2.8	2.8	4.8823	8657500	8898500	5394100	4471000	4269300	6971900	4620300	8802500	11647000	11679000	13403000	6589000	0	0	0	0	0	0	0	0	0	0	0	0	4
tr|A0A1S3X0H8|A0A1S3X0H8_TOBAC;tr|A0A1S4AZC1|A0A1S4AZC1_TOBAC;tr|A0A1S4BRQ5|A0A1S4BRQ5_TOBAC	tr|A0A1S3X0H8|A0A1S3X0H8_TOBAC 60S ribosomal protein L27 OS=Nicotiana tabacum OX=4097 GN=LOC107759969 PE=3 SV=1;tr|A0A1S4AZC1|A0A1S4AZC1_TOBAC 60S ribosomal protein L27 OS=Nicotiana tabacum OX=4097 GN=LOC107802935 PE=3 SV=1;tr|A0A1S4BRQ5|A0A1S4BRQ5_TOBAC 6	3	1	1	20	5.9	5.9	3.522	25987000	54392000	23305000	14717000	59754000	70319000	39858000	10003000	33285000	79689000	48679000	6672300	0	0	0	0	0	0	0	0	0	0	0	0	9
tr|A0A1S4DMY9|A0A1S4DMY9_TOBAC;tr|A0A1S3X0S0|A0A1S3X0S0_TOBAC;tr|A0A1S4A7M5|A0A1S4A7M5_TOBAC;tr|A0A1S4AC06|A0A1S4AC06_TOBAC;tr|A0A1S3ZQK3|A0A1S3ZQK3_TOBAC;tr|A0A1S3XEN1|A0A1S3XEN1_TOBAC;tr|A0A1S3X0I4|A0A1S3X0I4_TOBAC	tr|A0A1S4DMY9|A0A1S4DMY9_TOBAC 60S ribosomal protein L19-2 OS=Nicotiana tabacum OX=4097 GN=LOC107831514 PE=3 SV=1;tr|A0A1S3X0S0|A0A1S3X0S0_TOBAC Ribosomal protein L19 OS=Nicotiana tabacum OX=4097 GN=LOC107759916 PE=3 SV=1;tr|A0A1S4A7M5|A0A1S4A7M5_TOBAC Rib	3	3	3	18.7	18.7	18.7	54.81	824240000	1772600000	673700000	831680000	1036100000	1525100000	1036800000	325370000	658420000	1066400000	531740000	300280000	557090000	463000000	661680000	863810000	500020000	606420000	610750000	425530000	292260000	426310000	447530000	329210000	24
tr|A0A1S4BWA4|A0A1S4BWA4_TOBAC;tr|A0A1S3X0M5|A0A1S3X0M5_TOBAC	tr|A0A1S4BWA4|A0A1S4BWA4_TOBAC 60S ribosomal protein L4-like OS=Nicotiana tabacum OX=4097 GN=LOC107812501 PE=3 SV=1;tr|A0A1S3X0M5|A0A1S3X0M5_TOBAC 60S ribosomal protein L4-like OS=Nicotiana tabacum OX=4097 GN=LOC107759872 PE=3 SV=1	16	3	2	43.5	10.1	5.9	20.671	456180000	791240000	191230000	213530000	646470000	960970000	375120000	179990000	262670000	209390000	403830000	100990000	176000000	156620000	156110000	133010000	149570000	264700000	142800000	226950000	126520000	74701000	99383000	82280000	12
tr|A0A1S4C5I3|A0A1S4C5I3_TOBAC;tr|A0A1S3X0M8|A0A1S3X0M8_TOBAC;tr|H9CCH8|H9CCH8_TOBAC	tr|A0A1S4C5I3|A0A1S4C5I3_TOBAC 3-oxoacyl-[acyl-carrier-protein] synthase 3 A, chloroplastic-like OS=Nicotiana tabacum OX=4097 GN=LOC107815403 PE=3 SV=1;tr|A0A1S3X0M8|A0A1S3X0M8_TOBAC 3-oxoacyl-[acyl-carrier-protein] synthase 3 A, chloroplastic-like OS=Nico	5	5	5	15.6	15.6	15.6	15.509	182840000	362820000	110170000	97087000	263420000	276870000	85563000	46200000	246840000	215100000	238570000	120560000	68831000	80730000	62799000	60497000	48533000	70388000	46909000	58753000	57811000	59711000	47338000	76574000	7
tr|A0A1S3X1I0|A0A1S3X1I0_TOBAC;tr|A0A1S3X0V3|A0A1S3X0V3_TOBAC	tr|A0A1S3X1I0|A0A1S3X1I0_TOBAC adenylate isopentenyltransferase isoform X2 OS=Nicotiana tabacum OX=4097 GN=LOC107760037 PE=3 SV=1;tr|A0A1S3X0V3|A0A1S3X0V3_TOBAC adenylate isopentenyltransferase isoform X1 OS=Nicotiana tabacum OX=4097 GN=LOC107760037 PE=3 S	1	1	1	2.1	2.1	2.1	2.593	675230000	1471500000	551620000	496030000	2059100000	3244400000	1239300000	660870000	1263100000	3282300000	3577000000	502600000	0	0	0	0	0	0	0	0	0	0	0	0	40
tr|A0A1S4C1W9|A0A1S4C1W9_TOBAC;tr|A0A1S3YU22|A0A1S3YU22_TOBAC;tr|A0A1S4CNC5|A0A1S4CNC5_TOBAC;tr|A0A1S3X0W4|A0A1S3X0W4_TOBAC	tr|A0A1S4C1W9|A0A1S4C1W9_TOBAC cytochrome c1-1, heme protein, mitochondrial-like OS=Nicotiana tabacum OX=4097 GN=LOC107814270 PE=4 SV=1;tr|A0A1S3YU22|A0A1S3YU22_TOBAC cytochrome c1-1, heme protein, mitochondrial OS=Nicotiana tabacum OX=4097 GN=LOC107779532	1	1	1	4.6	4.6	4.6	9.3057	0	242290000	0	0	0	107420000	44638000	28988000	181640000	0	0	0	0	0	0	0	0	0	0	0	0	0	0	0	4
tr|A0A1S3X0Y0|A0A1S3X0Y0_TOBAC;tr|A0A1S3Y5I1|A0A1S3Y5I1_TOBAC;sp|P25317|GSTXA_TOBAC	tr|A0A1S3X0Y0|A0A1S3X0Y0_TOBAC glutathione transferase OS=Nicotiana tabacum OX=4097 GN=LOC107760143 PE=3 SV=1;tr|A0A1S3Y5I1|A0A1S3Y5I1_TOBAC glutathione transferase OS=Nicotiana tabacum OX=4097 GN=LOC107772524 PE=3 SV=1;sp|P25317|GSTXA_TOBAC Probable gluta	4	3	3	15	11.4	11.4	5.8733	70324000	145140000	43861000	52954000	82610000	74324000	49750000	11022000	147890000	149100000	100740000	33927000	32196000	77117000	49507000	46394000	39543000	35689000	31548000	0	67854000	72916000	42812000	37363000	14
tr|A0A1S3X0Y5|A0A1S3X0Y5_TOBAC;tr|A0A1S3Y5Z1|A0A1S3Y5Z1_TOBAC	tr|A0A1S3X0Y5|A0A1S3X0Y5_TOBAC Ferredoxin--NADP reductase, chloroplastic OS=Nicotiana tabacum OX=4097 GN=LOC107760150 PE=3 SV=1;tr|A0A1S3Y5Z1|A0A1S3Y5Z1_TOBAC Ferredoxin--NADP reductase, chloroplastic OS=Nicotiana tabacum OX=4097 GN=LOC107772606 PE=3 SV=1	11	11	7	39.2	39.2	26	89.534	1224300000	2303500000	659360000	970680000	812800000	2106200000	907310000	1423500000	2606200000	1931300000	2162200000	1014800000	670160000	634890000	572450000	664600000	311320000	563840000	407340000	754990000	735400000	594160000	717450000	530530000	62
tr|A0A1S4A5I6|A0A1S4A5I6_TOBAC;tr|A0A1S3X0Z2|A0A1S3X0Z2_TOBAC	tr|A0A1S4A5I6|A0A1S4A5I6_TOBAC thylakoid lumenal 17.4 kDa protein, chloroplastic-like OS=Nicotiana tabacum OX=4097 GN=LOC107793983 PE=4 SV=1;tr|A0A1S3X0Z2|A0A1S3X0Z2_TOBAC thylakoid lumenal 17.4 kDa protein, chloroplastic-like OS=Nicotiana tabacum OX=4097	1	1	1	4.6	4.6	4.6	4.7348	80022000	82278000	0	0	0	0	48482000	25587000	113790000	151340000	147840000	35057000	0	0	0	0	0	0	0	0	0	0	0	0	3
tr|A0A1S3X119|A0A1S3X119_TOBAC;tr|A0A1S3YYJ5|A0A1S3YYJ5_TOBAC	tr|A0A1S3X119|A0A1S3X119_TOBAC 5-3 exoribonuclease 2-like OS=Nicotiana tabacum OX=4097 GN=LOC107760109 PE=4 SV=1;tr|A0A1S3YYJ5|A0A1S3YYJ5_TOBAC cold and drought-regulated protein CORA-like OS=Nicotiana tabacum OX=4097 GN=LOC107781043 PE=4 SV=1	4	4	3	16.5	16.5	13.7	15.363	140300000	139470000	19035000	51066000	360570000	204100000	111540000	41267000	153850000	263860000	345480000	19302000	78266000	70396000	26760000	24637000	110910000	74353000	55083000	50864000	45268000	61547000	82906000	25203000	22
tr|A0A1S3X1S3|A0A1S3X1S3_TOBAC;tr|A0A1S3X1A4|A0A1S3X1A4_TOBAC	tr|A0A1S3X1S3|A0A1S3X1S3_TOBAC uncharacterized protein LOC107760261 isoform X2 OS=Nicotiana tabacum OX=4097 GN=LOC107760261 PE=4 SV=1;tr|A0A1S3X1A4|A0A1S3X1A4_TOBAC uncharacterized protein LOC107760261 isoform X1 OS=Nicotiana tabacum OX=4097 GN=LOC10776026	1	1	1	2.8	2.8	2.8	-2	166370000	585140000	133140000	111790000	157950000	173350000	118220000	63518000	127300000	175230000	302480000	63193000	0	0	0	0	0	0	0	0	0	0	0	0	2
tr|A0A1S3X1A8|A0A1S3X1A8_TOBAC;tr|A0A1S4BR11|A0A1S4BR11_TOBAC	tr|A0A1S3X1A8|A0A1S3X1A8_TOBAC NAD(P)H-quinone oxidoreductase subunit N, chloroplastic-like OS=Nicotiana tabacum OX=4097 GN=LOC107760205 PE=4 SV=1;tr|A0A1S4BR11|A0A1S4BR11_TOBAC NAD(P)H-quinone oxidoreductase subunit N, chloroplastic-like OS=Nicotiana taba	6	6	6	30.1	30.1	30.1	18.197	554170000	477340000	177130000	237290000	437600000	506910000	417580000	117800000	355900000	349070000	337750000	207300000	257430000	112550000	130550000	161390000	134820000	120940000	189630000	124170000	105260000	77296000	95488000	136710000	29
tr|A0A1S3YJT0|A0A1S3YJT0_TOBAC;tr|A0A1S3X1F6|A0A1S3X1F6_TOBAC	tr|A0A1S3YJT0|A0A1S3YJT0_TOBAC V-type proton ATPase subunit E-like OS=Nicotiana tabacum OX=4097 GN=LOC107777047 PE=3 SV=1;tr|A0A1S3X1F6|A0A1S3X1F6_TOBAC V-type proton ATPase subunit E-like OS=Nicotiana tabacum OX=4097 GN=LOC107760017 PE=3 SV=1	2	1	1	10	5.6	5.6	2.9282	0	0	0	0	0	35852000	0	17769000	46926000	0	0	0	0	0	0	0	0	0	0	0	0	0	0	0	1
tr|A0A1S4CYX6|A0A1S4CYX6_TOBAC;tr|A0A1S3X1G1|A0A1S3X1G1_TOBAC;tr|D6PZY6|D6PZY6_TOBAC;tr|A0A1S4CHM7|A0A1S4CHM7_TOBAC;tr|A0A1S4BAZ0|A0A1S4BAZ0_TOBAC;tr|A0A1S3ZCH7|A0A1S3ZCH7_TOBAC	tr|A0A1S4CYX6|A0A1S4CYX6_TOBAC glycine-rich RNA-binding protein-like OS=Nicotiana tabacum OX=4097 GN=LOC107823997 PE=4 SV=1;tr|A0A1S3X1G1|A0A1S3X1G1_TOBAC glycine-rich RNA-binding protein GRP1A-like isoform X2 OS=Nicotiana tabacum OX=4097 GN=LOC107760024 P	2	1	1	22.2	14.8	14.8	27.493	76762000	86324000	29636000	23752000	62713000	105380000	41084000	20045000	70686000	128500000	69651000	42558000	0	0	0	0	0	0	0	0	0	0	0	0	3
tr|A0A1S4B2Y7|A0A1S4B2Y7_TOBAC;tr|A0A1S3X1I5|A0A1S3X1I5_TOBAC	tr|A0A1S4B2Y7|A0A1S4B2Y7_TOBAC 50S ribosomal protein L6, chloroplastic-like OS=Nicotiana tabacum OX=4097 GN=LOC107803875 PE=3 SV=1;tr|A0A1S3X1I5|A0A1S3X1I5_TOBAC 50S ribosomal protein L6, chloroplastic-like OS=Nicotiana tabacum OX=4097 GN=LOC107760041 PE=3	6	6	6	31.6	31.6	31.6	28.842	390590000	2470300000	216660000	191370000	697860000	953280000	508980000	175160000	871820000	617020000	380730000	132940000	161630000	427260000	156230000	175760000	194730000	227240000	242470000	92321000	223350000	150920000	166170000	90642000	51
tr|A0A1S4CWX7|A0A1S4CWX7_TOBAC;tr|A0A1S3X1Q2|A0A1S3X1Q2_TOBAC;tr|A0A1S3Z906|A0A1S3Z906_TOBAC;tr|A0A1S3ZJX5|A0A1S3ZJX5_TOBAC	tr|A0A1S4CWX7|A0A1S4CWX7_TOBAC 40S ribosomal protein S7 OS=Nicotiana tabacum OX=4097 GN=LOC107823503 PE=3 SV=1;tr|A0A1S3X1Q2|A0A1S3X1Q2_TOBAC 40S ribosomal protein S7 OS=Nicotiana tabacum OX=4097 GN=LOC107760389 PE=3 SV=1;tr|A0A1S3Z906|A0A1S3Z906_TOBAC 40S	6	1	1	45.5	14.7	14.7	10.681	152920000	169750000	196690000	123570000	184560000	149040000	138450000	155560000	258870000	0	216380000	0	0	0	0	0	0	0	0	0	0	0	0	0	21
tr|A0A1S4BPE9|A0A1S4BPE9_TOBAC;tr|A0A1S3X1V7|A0A1S3X1V7_TOBAC	tr|A0A1S4BPE9|A0A1S4BPE9_TOBAC Signal recognition particle subunit SRP68 OS=Nicotiana tabacum OX=4097 GN=LOC107810486 PE=3 SV=1;tr|A0A1S3X1V7|A0A1S3X1V7_TOBAC Signal recognition particle subunit SRP68 OS=Nicotiana tabacum OX=4097 GN=LOC107760293 PE=3 SV=1	4	4	4	11.6	11.6	11.6	65.298	185030000	291040000	161780000	110270000	184930000	360740000	400960000	123720000	448910000	293580000	455350000	177170000	57886000	44307000	92439000	60671000	41729000	56637000	127210000	86452000	89315000	53183000	73834000	99698000	43
tr|A0A1S3X1X9|A0A1S3X1X9_TOBAC	tr|A0A1S3X1X9|A0A1S3X1X9_TOBAC serine/threonine-protein kinase OXI1-like OS=Nicotiana tabacum OX=4097 GN=LOC107760198 PE=4 SV=1	1	1	1	5.1	5.1	5.1	-2	164330000	162800000	53769000	127250000	99399000	70452000	0	55809000	158500000	139970000	305050000	0	0	0	0	0	0	0	0	0	0	0	0	0	1
tr|Q9XGH8|Q9XGH8_TOBAC;tr|Q84YH6|Q84YH6_TOBAC;tr|Q43579|Q43579_TOBAC;tr|Q43580|Q43580_TOBAC;tr|A0A1S3X211|A0A1S3X211_TOBAC	tr|Q9XGH8|Q9XGH8_TOBAC Putative preprocysteine proteinase OS=Nicotiana tabacum OX=4097 GN=cpr2 PE=2 SV=1;tr|Q84YH6|Q84YH6_TOBAC CPR2-like cysteine proteinase OS=Nicotiana tabacum OX=4097 PE=3 SV=1;tr|Q43579|Q43579_TOBAC Tobacco pre-pro-cysteine proteinase	1	1	1	5.2	5.2	5.2	4.4398	70778000	53094000	28224000	32350000	0	0	0	0	0	0	0	17325000	0	0	0	0	0	0	0	0	0	0	0	0	2
tr|A0A1S3X222|A0A1S3X222_TOBAC	tr|A0A1S3X222|A0A1S3X222_TOBAC transcription repressor MYB4-like OS=Nicotiana tabacum OX=4097 GN=LOC107760438 PE=4 SV=1	1	1	1	9.6	9.6	9.6	2.7536	134360000	272790000	83727000	108900000	0	0	0	12783000	214410000	0	356590000	120660000	0	0	0	0	0	0	0	0	0	0	0	0	1
tr|A0A1S4A2S4|A0A1S4A2S4_TOBAC;tr|A0A1S3X265|A0A1S3X265_TOBAC	tr|A0A1S4A2S4|A0A1S4A2S4_TOBAC putative oligosaccharyltransferase complex subunit CG9662 OS=Nicotiana tabacum OX=4097 GN=LOC107793198 PE=3 SV=1;tr|A0A1S3X265|A0A1S3X265_TOBAC putative oligosaccharyltransferase complex subunit CG9662 OS=Nicotiana tabacum OX	1	1	1	7.9	7.9	7.9	3.8269	24374000	0	0	0	74665000	0	57863000	26078000	29588000	32843000	0	18908000	0	0	0	0	0	0	0	0	0	0	0	0	1
tr|A0A1S4DNH2|A0A1S4DNH2_TOBAC;tr|A0A1S3X267|A0A1S3X267_TOBAC	tr|A0A1S4DNH2|A0A1S4DNH2_TOBAC S-norcoclaurine synthase 1-like OS=Nicotiana tabacum OX=4097 GN=LOC107831696 PE=4 SV=1;tr|A0A1S3X267|A0A1S3X267_TOBAC S-norcoclaurine synthase 1-like OS=Nicotiana tabacum OX=4097 GN=LOC107760472 PE=4 SV=1	2	2	2	10.5	10.5	10.5	7.9645	39833000	212800000	44706000	66953000	99462000	0	94893000	17835000	4300400	0	0	1883700	0	0	0	0	0	0	0	0	0	0	0	0	10
tr|A0A1S3X2B9|A0A1S3X2B9_TOBAC;tr|A0A1S4DFN4|A0A1S4DFN4_TOBAC;tr|A0A1S4BYF6|A0A1S4BYF6_TOBAC;tr|A0A1S3Y462|A0A1S3Y462_TOBAC	tr|A0A1S3X2B9|A0A1S3X2B9_TOBAC oxoglutarate dehydrogenase (succinyl-transferring) OS=Nicotiana tabacum OX=4097 GN=LOC107760583 PE=3 SV=1;tr|A0A1S4DFN4|A0A1S4DFN4_TOBAC 2-oxoglutarate dehydrogenase, mitochondrial-like OS=Nicotiana tabacum OX=4097 GN=LOC1078	3	3	3	5.2	5.2	5.2	39.218	60708000	24657000	38447000	13513000	33634000	99557000	34714000	21109000	89922000	46414000	73516000	32433000	0	0	31010000	0	0	0	0	33297000	68133000	32694000	0	0	12
tr|A0A1S3X2C4|A0A1S3X2C4_TOBAC;tr|A0A1S3YXI7|A0A1S3YXI7_TOBAC	tr|A0A1S3X2C4|A0A1S3X2C4_TOBAC DEAD-box ATP-dependent RNA helicase 31-like OS=Nicotiana tabacum OX=4097 GN=LOC107760327 PE=4 SV=1;tr|A0A1S3YXI7|A0A1S3YXI7_TOBAC DEAD-box ATP-dependent RNA helicase 31-like OS=Nicotiana tabacum OX=4097 GN=LOC107780767 PE=4 S	4	4	4	7	7	7	23.637	132510000	197200000	83465000	90939000	133510000	188580000	56213000	50037000	147810000	85327000	146030000	65217000	50462000	86899000	59601000	62871000	32846000	34687000	37514000	40986000	41716000	36292000	51580000	34694000	18
tr|A0A1S4A371|A0A1S4A371_TOBAC;tr|A0A1S3X2D8|A0A1S3X2D8_TOBAC;tr|A0A1S3YJC9|A0A1S3YJC9_TOBAC;tr|A0A1S3YIH5|A0A1S3YIH5_TOBAC	tr|A0A1S4A371|A0A1S4A371_TOBAC Coatomer subunit gamma OS=Nicotiana tabacum OX=4097 GN=LOC107793274 PE=3 SV=1;tr|A0A1S3X2D8|A0A1S3X2D8_TOBAC Coatomer subunit gamma OS=Nicotiana tabacum OX=4097 GN=LOC107760598 PE=3 SV=1;tr|A0A1S3YJC9|A0A1S3YJC9_TOBAC Coatome	11	11	11	21.2	21.2	21.2	130.67	919260000	678040000	566250000	332630000	831080000	999260000	646550000	358990000	843260000	860830000	664200000	596600000	231190000	116490000	221920000	115330000	111150000	111110000	154400000	191120000	122610000	88831000	91645000	204350000	59
tr|A0A1S3X2E3|A0A1S3X2E3_TOBAC;tr|A0A1S4C9P9|A0A1S4C9P9_TOBAC	tr|A0A1S3X2E3|A0A1S3X2E3_TOBAC vacuolar protein sorting-associated protein 35B-like OS=Nicotiana tabacum OX=4097 GN=LOC107760603 PE=3 SV=1;tr|A0A1S4C9P9|A0A1S4C9P9_TOBAC Vacuolar protein sorting-associated protein 35 OS=Nicotiana tabacum OX=4097 GN=LOC1078	1	1	1	3	3	3	4.1562	0	0	0	0	4682900	4152300	1861200	0	2735800	3150900	5031700	0	0	0	0	0	0	0	0	0	0	0	0	0	3
tr|A0A1S3Y0M1|A0A1S3Y0M1_TOBAC;tr|A0A1S3Y172|A0A1S3Y172_TOBAC;tr|A0A1S3X2H1|A0A1S3X2H1_TOBAC	tr|A0A1S3Y0M1|A0A1S3Y0M1_TOBAC nudix hydrolase 3-like isoform X2 OS=Nicotiana tabacum OX=4097 GN=LOC107770936 PE=4 SV=1;tr|A0A1S3Y172|A0A1S3Y172_TOBAC nudix hydrolase 3-like isoform X1 OS=Nicotiana tabacum OX=4097 GN=LOC107770936 PE=4 SV=1;tr|A0A1S3X2H1|A0	1	1	1	2	2	2	3.97	0	0	0	0	0	124510000	22954000	0	0	0	105790000	0	0	0	0	0	0	0	0	0	0	0	0	0	2
tr|A0A1S3X2T9|A0A1S3X2T9_TOBAC;tr|A0A1S3ZFD2|A0A1S3ZFD2_TOBAC;tr|A0A1S3YCA9|A0A1S3YCA9_TOBAC	tr|A0A1S3X2T9|A0A1S3X2T9_TOBAC 60S ribosomal protein L30-like OS=Nicotiana tabacum OX=4097 GN=LOC107760678 PE=3 SV=1;tr|A0A1S3ZFD2|A0A1S3ZFD2_TOBAC 60S ribosomal protein L30-like OS=Nicotiana tabacum OX=4097 GN=LOC107786065 PE=3 SV=1;tr|A0A1S3YCA9|A0A1S3YC	4	1	1	35.7	10.7	10.7	7.5801	0	0	0	0	29046000	302250000	104350000	45664000	0	0	0	0	0	0	0	0	0	0	0	0	0	0	0	0	4
tr|A0A1S3X2Z0|A0A1S3X2Z0_TOBAC;tr|A0A1S4BBF5|A0A1S4BBF5_TOBAC;tr|A0A1S3XXM3|A0A1S3XXM3_TOBAC;tr|A0A1S3XGM0|A0A1S3XGM0_TOBAC	tr|A0A1S3X2Z0|A0A1S3X2Z0_TOBAC triosephosphate isomerase, chloroplastic-like OS=Nicotiana tabacum OX=4097 GN=LOC107760622 PE=3 SV=1;tr|A0A1S4BBF5|A0A1S4BBF5_TOBAC triosephosphate isomerase, chloroplastic-like OS=Nicotiana tabacum OX=4097 GN=LOC107806500 PE	4	4	4	19.9	19.9	19.9	23.749	33638000	30484000	32491000	13922000	10796000	517880000	535920000	423170000	269170000	245670000	420480000	91303000	84837000	0	0	0	0	163490000	127030000	264360000	344960000	211810000	258500000	164950000	14
tr|Q40568|Q40568_TOBAC;tr|A0A1S4D181|A0A1S4D181_TOBAC;tr|A0A1S3X312|A0A1S3X312_TOBAC	tr|Q40568|Q40568_TOBAC Phosphate translocator OS=Nicotiana tabacum OX=4097 PE=2 SV=1;tr|A0A1S4D181|A0A1S4D181_TOBAC triose phosphate/phosphate translocator, chloroplastic OS=Nicotiana tabacum OX=4097 GN=LOC107824785 PE=4 SV=1;tr|A0A1S3X312|A0A1S3X312_TOBAC	1	1	1	6.2	6.2	6.2	13.849	58311000	34745000	17890000	9870400	0	0	0	27641000	25079000	0	0	26443000	0	0	0	0	0	0	0	0	0	0	0	0	1
tr|A0A1S3X314|A0A1S3X314_TOBAC;tr|A0A1S3ZHJ3|A0A1S3ZHJ3_TOBAC	tr|A0A1S3X314|A0A1S3X314_TOBAC Eukaryotic translation initiation factor 3 subunit C OS=Nicotiana tabacum OX=4097 GN=LOC107760783 PE=3 SV=1;tr|A0A1S3ZHJ3|A0A1S3ZHJ3_TOBAC eukaryotic translation initiation factor 3 subunit C-like OS=Nicotiana tabacum OX=4097	4	4	1	5.7	5.7	2.2	18.566	127840000	167700000	48021000	61415000	85631000	126900000	27498000	91132000	168640000	153860000	123840000	50390000	59043000	46043000	0	73683000	53133000	42419000	0	69138000	63661000	41786000	41709000	0	10
tr|A0A1S3ZY45|A0A1S3ZY45_TOBAC;tr|A0A1S3X320|A0A1S3X320_TOBAC	tr|A0A1S3ZY45|A0A1S3ZY45_TOBAC 2-isopropylmalate synthase OS=Nicotiana tabacum OX=4097 GN=LOC107791752 PE=3 SV=1;tr|A0A1S3X320|A0A1S3X320_TOBAC 2-isopropylmalate synthase OS=Nicotiana tabacum OX=4097 GN=LOC107760648 PE=3 SV=1	1	1	1	4	4	4	42.952	255260000	322230000	303090000	219520000	164020000	287310000	125310000	130240000	209650000	155370000	170100000	174580000	209720000	122710000	384780000	306090000	99137000	118180000	86916000	221530000	108980000	76564000	66643000	209770000	26
tr|A0A1S3X344|A0A1S3X344_TOBAC;tr|A0A1S4BYP1|A0A1S4BYP1_TOBAC;tr|A0A1S4BYP2|A0A1S4BYP2_TOBAC	tr|A0A1S3X344|A0A1S3X344_TOBAC uncharacterized protein LOC107760560 OS=Nicotiana tabacum OX=4097 GN=LOC107760560 PE=3 SV=1;tr|A0A1S4BYP1|A0A1S4BYP1_TOBAC uncharacterized protein LOC107813285 isoform X2 OS=Nicotiana tabacum OX=4097 GN=LOC107813285 PE=3 SV=1	5	5	5	7.4	7.4	7.4	116.28	266240000	261030000	177400000	178900000	210840000	435060000	242930000	361270000	365510000	377670000	229280000	182780000	131780000	65106000	143230000	162410000	57728000	78276000	86226000	300690000	93893000	66384000	116670000	129090000	39
tr|A0A1S3X369|A0A1S3X369_TOBAC;tr|A0A1S3WZG9|A0A1S3WZG9_TOBAC;tr|A0A1S3WZQ2|A0A1S3WZQ2_TOBAC	tr|A0A1S3X369|A0A1S3X369_TOBAC actin-depolymerizing factor 2 OS=Nicotiana tabacum OX=4097 GN=LOC107760585 PE=3 SV=1;tr|A0A1S3WZG9|A0A1S3WZG9_TOBAC actin-depolymerizing factor 2-like isoform X2 OS=Nicotiana tabacum OX=4097 GN=LOC107759643 PE=3 SV=1;tr|A0A1S	2	1	1	18.2	8.4	8.4	4.234	0	60453000	0	27344000	0	85439000	50100000	37921000	0	0	51379000	0	0	0	0	0	0	0	0	0	0	0	0	0	2
tr|A0A1S4AVA2|A0A1S4AVA2_TOBAC;tr|A0A1S3X398|A0A1S3X398_TOBAC;tr|A0A1S4AVS8|A0A1S4AVS8_TOBAC;tr|A0A1S3X3G9|A0A1S3X3G9_TOBAC	tr|A0A1S4AVA2|A0A1S4AVA2_TOBAC copper transport protein ATX1-like isoform X2 OS=Nicotiana tabacum OX=4097 GN=LOC107801743 PE=4 SV=1;tr|A0A1S3X398|A0A1S3X398_TOBAC copper transport protein ATX1-like isoform X2 OS=Nicotiana tabacum OX=4097 GN=LOC107760780 PE	1	1	1	12.1	12.1	12.1	2.9981	136150000	148820000	57097000	59376000	124790000	174850000	0	32262000	294460000	85548000	207110000	0	0	0	0	0	0	0	0	0	0	0	0	0	1
tr|A0A1S3X3B5|A0A1S3X3B5_TOBAC;tr|A0A1S4A7M9|A0A1S4A7M9_TOBAC	tr|A0A1S3X3B5|A0A1S3X3B5_TOBAC protein TPLATE OS=Nicotiana tabacum OX=4097 GN=LOC107760733 PE=4 SV=1;tr|A0A1S4A7M9|A0A1S4A7M9_TOBAC protein TPLATE-like OS=Nicotiana tabacum OX=4097 GN=LOC107794600 PE=4 SV=1	2	2	2	2.1	2.1	2.1	15.198	47800000	49332000	39733000	37470000	37641000	70949000	35654000	30334000	34414000	32032000	51280000	61687000	0	0	0	0	0	0	0	0	0	0	0	0	14
tr|A0A1S3X3B7|A0A1S3X3B7_TOBAC;tr|A0A1S3XUQ9|A0A1S3XUQ9_TOBAC	tr|A0A1S3X3B7|A0A1S3X3B7_TOBAC uncharacterized protein LOC107760880 OS=Nicotiana tabacum OX=4097 GN=LOC107760880 PE=4 SV=1;tr|A0A1S3XUQ9|A0A1S3XUQ9_TOBAC uncharacterized protein LOC107768943 OS=Nicotiana tabacum OX=4097 GN=LOC107768943 PE=4 SV=1	1	1	1	4.9	4.9	4.9	31.834	16211000	10969000	17173000	3407300	5067000	12847000	6749900	9199000	12743000	5526100	8247900	8541500	0	0	0	0	0	0	0	0	0	0	0	0	8
tr|A0A1S3X3I8|A0A1S3X3I8_TOBAC;tr|A0A1S4CE14|A0A1S4CE14_TOBAC	tr|A0A1S3X3I8|A0A1S3X3I8_TOBAC polynucleotide 5-hydroxyl-kinase NOL9-like OS=Nicotiana tabacum OX=4097 GN=LOC107760803 PE=4 SV=1;tr|A0A1S4CE14|A0A1S4CE14_TOBAC polynucleotide 5-hydroxyl-kinase NOL9-like OS=Nicotiana tabacum OX=4097 GN=LOC107818050 PE=4 S	6	6	6	17.8	17.8	17.8	54.914	1264100000	2576400000	695480000	614030000	1291900000	1476600000	1077700000	637490000	1419600000	1527300000	1323000000	759230000	486310000	689540000	483310000	465390000	331370000	265550000	410920000	460730000	287380000	342160000	256310000	524070000	64
tr|A0A1S3ZX72|A0A1S3ZX72_TOBAC;tr|A0A1S3X3J1|A0A1S3X3J1_TOBAC	tr|A0A1S3ZX72|A0A1S3ZX72_TOBAC haloacid dehalogenase-like hydrolase domain-containing protein At3g48420 OS=Nicotiana tabacum OX=4097 GN=LOC107791365 PE=4 SV=1;tr|A0A1S3X3J1|A0A1S3X3J1_TOBAC haloacid dehalogenase-like hydrolase domain-containing protein At3	4	4	4	15.8	15.8	15.8	37.033	393910000	661790000	393590000	194880000	746150000	1052500000	434390000	297670000	705790000	898260000	878280000	223700000	213000000	189500000	194870000	192840000	250590000	276950000	287640000	301850000	264540000	246860000	257840000	226060000	41
tr|O04361|O04361_TOBAC;tr|A0A1S3X3N6|A0A1S3X3N6_TOBAC	tr|O04361|O04361_TOBAC Prohibitin OS=Nicotiana tabacum OX=4097 GN=LOC107817175 PE=2 SV=1;tr|A0A1S3X3N6|A0A1S3X3N6_TOBAC Prohibitin OS=Nicotiana tabacum OX=4097 GN=LOC107760841 PE=3 SV=1	1	1	1	4.7	4.7	4.7	4.3156	0	0	0	0	0	128420000	0	0	0	0	0	0	0	0	0	0	0	0	0	0	0	0	0	0	1
tr|A0A1S3X3Q5|A0A1S3X3Q5_TOBAC;tr|B6RCM0|B6RCM0_TOBAC;tr|A0A1S4DKZ0|A0A1S4DKZ0_TOBAC;tr|A0A1S4DLA7|A0A1S4DLA7_TOBAC;tr|A0A1S4D1L0|A0A1S4D1L0_TOBAC;tr|A0A1S4D231|A0A1S4D231_TOBAC	tr|A0A1S3X3Q5|A0A1S3X3Q5_TOBAC uncharacterized protein LOC107760858 OS=Nicotiana tabacum OX=4097 GN=LOC107760858 PE=3 SV=1;tr|B6RCM0|B6RCM0_TOBAC Chilling-responsive protein OS=Nicotiana tabacum OX=4097 PE=2 SV=1;tr|A0A1S4DKZ0|A0A1S4DKZ0_TOBAC uncharacteri	2	2	2	10	10	10	7.998	15777000	44176000	0	8201100	14895000	34007000	0	28056000	136630000	57194000	65128000	16395000	0	0	0	0	0	0	0	0	0	0	0	0	2
tr|A0A1S4C146|A0A1S4C146_TOBAC;tr|A0A1S3X3V9|A0A1S3X3V9_TOBAC	tr|A0A1S4C146|A0A1S4C146_TOBAC heterogeneous nuclear ribonucleoprotein 1-like OS=Nicotiana tabacum OX=4097 GN=LOC107814059 PE=4 SV=1;tr|A0A1S3X3V9|A0A1S3X3V9_TOBAC heterogeneous nuclear ribonucleoprotein 1-like OS=Nicotiana tabacum OX=4097 GN=LOC107760899	5	5	5	15.2	15.2	15.2	22.323	1223400000	1663400000	1236100000	873640000	2076900000	730430000	822580000	413010000	833410000	945210000	1341800000	582120000	561910000	795120000	1074100000	745120000	865850000	421020000	593880000	699220000	510140000	467870000	598750000	845370000	35
tr|A0A1S4B3Y2|A0A1S4B3Y2_TOBAC;tr|A0A1S3X411|A0A1S3X411_TOBAC	tr|A0A1S4B3Y2|A0A1S4B3Y2_TOBAC 54S ribosomal protein L37, mitochondrial-like OS=Nicotiana tabacum OX=4097 GN=LOC107804216 PE=3 SV=1;tr|A0A1S3X411|A0A1S3X411_TOBAC 54S ribosomal protein L37, mitochondrial-like OS=Nicotiana tabacum OX=4097 GN=LOC107760842 PE	2	2	2	18.9	18.9	18.9	7.3439	87299000	267280000	146880000	90112000	252770000	204060000	121300000	79799000	96219000	127710000	305760000	113490000	0	141520000	0	0	132590000	74906000	92247000	48673000	0	0	126570000	0	10
tr|A0A1S3X430|A0A1S3X430_TOBAC;tr|A0A1S4AJB9|A0A1S4AJB9_TOBAC	tr|A0A1S3X430|A0A1S3X430_TOBAC probable 60S ribosomal protein L14 OS=Nicotiana tabacum OX=4097 GN=LOC107760861 PE=3 SV=1;tr|A0A1S4AJB9|A0A1S4AJB9_TOBAC probable 60S ribosomal protein L14 OS=Nicotiana tabacum OX=4097 GN=LOC107798250 PE=3 SV=1	7	7	5	36.8	36.8	20.3	23.108	1683800000	2868700000	680030000	420060000	1430400000	1611500000	1582500000	497550000	2604400000	2762200000	2896800000	446450000	423720000	807910000	658440000	593000000	702960000	782800000	922150000	613680000	570980000	733240000	597530000	416980000	69
tr|A0A1S3X434|A0A1S3X434_TOBAC	tr|A0A1S3X434|A0A1S3X434_TOBAC 50S ribosomal protein L5, chloroplastic OS=Nicotiana tabacum OX=4097 GN=LOC107761040 PE=3 SV=1	7	7	4	38.2	38.2	21	48.872	867400000	1854000000	537510000	453920000	1662200000	2072900000	1132700000	583660000	1164500000	904820000	1647800000	494990000	337620000	350410000	307120000	290290000	291470000	319150000	258070000	355010000	257830000	219340000	281280000	285950000	51
tr|A0A1S4DK87|A0A1S4DK87_TOBAC;tr|A0A1S4DP07|A0A1S4DP07_TOBAC;tr|A0A1S4DJZ3|A0A1S4DJZ3_TOBAC;tr|A0A1S4D440|A0A1S4D440_TOBAC;tr|A0A1S3X435|A0A1S3X435_TOBAC	tr|A0A1S4DK87|A0A1S4DK87_TOBAC 50S ribosomal protein L3-2, chloroplastic-like isoform X2 OS=Nicotiana tabacum OX=4097 GN=LOC107830586 PE=3 SV=1;tr|A0A1S4DP07|A0A1S4DP07_TOBAC 50S ribosomal protein L3-2, chloroplastic-like OS=Nicotiana tabacum OX=4097 GN=LO	3	3	3	17.3	17.3	17.3	13.332	137400000	154690000	167070000	142880000	212470000	332450000	161710000	86077000	105150000	142760000	150340000	121760000	79692000	60289000	125030000	117140000	92534000	110270000	81674000	85937000	59627000	79272000	87223000	100150000	16
tr|A0A1S3X442|A0A1S3X442_TOBAC;tr|A0A1S4CV87|A0A1S4CV87_TOBAC	tr|A0A1S3X442|A0A1S3X442_TOBAC protein ECERIFERUM 26-like OS=Nicotiana tabacum OX=4097 GN=LOC107761109 PE=4 SV=1;tr|A0A1S4CV87|A0A1S4CV87_TOBAC protein ECERIFERUM 26-like OS=Nicotiana tabacum OX=4097 GN=LOC107822954 PE=4 SV=1	3	3	3	14.3	14.3	14.3	15.596	131980000	397070000	104400000	103070000	387300000	391380000	171090000	106590000	269590000	316950000	395910000	122050000	66687000	121220000	85320000	88087000	131140000	92072000	68984000	97759000	88834000	88243000	89509000	103760000	29
tr|A0A1S3XQS4|A0A1S3XQS4_TOBAC;tr|A0A1S3X4I1|A0A1S3X4I1_TOBAC	tr|A0A1S3XQS4|A0A1S3XQS4_TOBAC uncharacterized protein LOC107767513 OS=Nicotiana tabacum OX=4097 GN=LOC107767513 PE=3 SV=1;tr|A0A1S3X4I1|A0A1S3X4I1_TOBAC uncharacterized protein LOC107761075 OS=Nicotiana tabacum OX=4097 GN=LOC107761075 PE=3 SV=1	3	3	3	20.2	20.2	20.2	15.367	279090000	429620000	259250000	115610000	603620000	408410000	130110000	120060000	130340000	486730000	706120000	124540000	134080000	140570000	191940000	118710000	174470000	85453000	85607000	150780000	76925000	138910000	158870000	108200000	17
tr|A0A1S3X4J0|A0A1S3X4J0_TOBAC;tr|A0A1S4C443|A0A1S4C443_TOBAC;tr|A0A1S4BVK6|A0A1S4BVK6_TOBAC;tr|A0A1S3X4P9|A0A1S3X4P9_TOBAC	tr|A0A1S3X4J0|A0A1S3X4J0_TOBAC Sm protein F OS=Nicotiana tabacum OX=4097 GN=LOC107761142 PE=3 SV=1;tr|A0A1S4C443|A0A1S4C443_TOBAC Sm protein F OS=Nicotiana tabacum OX=4097 GN=LOC107814947 PE=3 SV=1;tr|A0A1S4BVK6|A0A1S4BVK6_TOBAC Sm protein F OS=Nicotiana t	1	1	1	11.8	11.8	11.8	8.9214	0	94723000	6068900	0	55604000	0	0	14016000	0	0	56991000	28794000	0	0	0	0	0	0	0	0	0	0	0	0	2
tr|A0A1S4DQY5|A0A1S4DQY5_TOBAC;tr|A0A1S3X4U8|A0A1S3X4U8_TOBAC;tr|J7EQB2|J7EQB2_TOBAC;tr|J7EPU9|J7EPU9_TOBAC	tr|A0A1S4DQY5|A0A1S4DQY5_TOBAC Methylenetetrahydrofolate reductase OS=Nicotiana tabacum OX=4097 GN=LOC107832493 PE=3 SV=1;tr|A0A1S3X4U8|A0A1S3X4U8_TOBAC Methylenetetrahydrofolate reductase OS=Nicotiana tabacum OX=4097 GN=LOC107761305 PE=3 SV=1;tr|J7EQB2|J7	3	3	3	5.6	5.6	5.6	14.89	48627000	25852000	14495000	0	21679000	57564000	25226000	30452000	156840000	97630000	38942000	30278000	0	0	0	0	0	0	0	0	41456000	22449000	0	0	6
tr|Q43796|Q43796_TOBAC;tr|Q43797|Q43797_TOBAC;tr|A0A1S4C7N1|A0A1S4C7N1_TOBAC;tr|A0A1S3X544|A0A1S3X544_TOBAC	tr|Q43796|Q43796_TOBAC H(+)-exporting diphosphatase (Fragment) OS=Nicotiana tabacum OX=4097 GN=ppa PE=2 SV=1;tr|Q43797|Q43797_TOBAC H(+)-exporting diphosphatase OS=Nicotiana tabacum OX=4097 GN=ppa PE=2 SV=1;tr|A0A1S4C7N1|A0A1S4C7N1_TOBAC H(+)-exporting dip	3	3	3	5.2	5.2	5.2	22.446	32493000	206320000	11842000	11489000	77139000	124920000	32706000	23423000	218910000	193910000	178350000	25290000	0	90737000	5924700	0	36497000	52360000	24472000	0	99081000	76981000	72203000	11404000	25
tr|A0A1S3X559|A0A1S3X559_TOBAC;tr|A1KYB1|A1KYB1_TOBAC;tr|A0A1S4ARB9|A0A1S4ARB9_TOBAC	tr|A0A1S3X559|A0A1S3X559_TOBAC Adenosylhomocysteinase OS=Nicotiana tabacum OX=4097 GN=LOC107761175 PE=3 SV=1;tr|A1KYB1|A1KYB1_TOBAC Adenosylhomocysteinase (Fragment) OS=Nicotiana tabacum OX=4097 GN=SAHH3 PE=2 SV=1;tr|A0A1S4ARB9|A0A1S4ARB9_TOBAC Adenosylhom	18	18	2	58.4	58.4	8.9	320.64	2856800000	4124100000	1819000000	1716100000	4606900000	8089100000	4397200000	2518700000	9028800000	8394600000	6331000000	3031000000	1039400000	939060000	1021700000	1053200000	1366100000	1781400000	1746900000	1686500000	2409800000	2008000000	1383100000	1903800000	115
tr|A0A1S3X596|A0A1S3X596_TOBAC;tr|A0A1S4CKT0|A0A1S4CKT0_TOBAC	tr|A0A1S3X596|A0A1S3X596_TOBAC putative vacuolar protein sorting-associated protein 13A OS=Nicotiana tabacum OX=4097 GN=LOC107761376 PE=4 SV=1;tr|A0A1S4CKT0|A0A1S4CKT0_TOBAC putative vacuolar protein sorting-associated protein 13A OS=Nicotiana tabacum OX=4	3	3	3	2.8	2.8	2.8	39.534	98776000	59853000	83077000	22444000	87473000	169330000	88525000	77016000	80205000	148500000	136640000	86773000	73890000	0	80770000	43288000	31655000	45973000	54713000	79937000	31981000	0	39742000	88249000	17
tr|A0A1S4B8V7|A0A1S4B8V7_TOBAC;tr|A0A1S3ZN23|A0A1S3ZN23_TOBAC;tr|A0A1S3Y2N7|A0A1S3Y2N7_TOBAC;tr|A0A1S3XI04|A0A1S3XI04_TOBAC;tr|A0A1S3X5A3|A0A1S3X5A3_TOBAC;tr|A0A1S3ZMK6|A0A1S3ZMK6_TOBAC;tr|Q9M5Z8|Q9M5Z8_TOBAC	tr|A0A1S4B8V7|A0A1S4B8V7_TOBAC Vacuolar proton pump subunit B OS=Nicotiana tabacum OX=4097 GN=LOC107805728 PE=3 SV=1;tr|A0A1S3ZN23|A0A1S3ZN23_TOBAC Vacuolar proton pump subunit B OS=Nicotiana tabacum OX=4097 GN=LOC107788603 PE=3 SV=1;tr|A0A1S3Y2N7|A0A1S3Y2	22	22	22	56.6	56.6	56.6	323.31	2495600000	4134700000	1253000000	1554600000	5164200000	7015000000	4112700000	2858100000	7420500000	8089500000	8000100000	2882100000	562170000	480110000	511220000	544380000	734380000	794300000	852220000	1186200000	1070500000	979500000	863210000	1005100000	227
tr|A0A1S3X5D0|A0A1S3X5D0_TOBAC;tr|A0A1S4A422|A0A1S4A422_TOBAC;tr|A0A1S3ZFN7|A0A1S3ZFN7_TOBAC;tr|A0A1S3ZGJ5|A0A1S3ZGJ5_TOBAC	tr|A0A1S3X5D0|A0A1S3X5D0_TOBAC NAD(P)H dehydrogenase (quinone) OS=Nicotiana tabacum OX=4097 GN=LOC107761412 PE=3 SV=1;tr|A0A1S4A422|A0A1S4A422_TOBAC NAD(P)H dehydrogenase (quinone) OS=Nicotiana tabacum OX=4097 GN=LOC107793479 PE=3 SV=1;tr|A0A1S3ZFN7|A0A1S3	2	2	1	13.3	13.3	7.9	8.0758	73410000	157150000	43679000	49686000	90402000	157750000	48658000	40131000	365960000	175540000	142940000	58726000	0	0	30680000	0	58608000	0	0	0	339690000	70160000	65706000	29676000	13
tr|A0A1S3X5F8|A0A1S3X5F8_TOBAC	tr|A0A1S3X5F8|A0A1S3X5F8_TOBAC Eukaryotic translation initiation factor 3 subunit A OS=Nicotiana tabacum OX=4097 GN=LOC107761510 PE=3 SV=1	5	1	1	7.7	1.9	1.9	10.212	57208000	40998000	37303000	12486000	43389000	38290000	24430000	20356000	39294000	38035000	53037000	25506000	0	0	0	0	0	0	0	0	0	0	0	0	3
tr|A0A1S3X5H7|A0A1S3X5H7_TOBAC	tr|A0A1S3X5H7|A0A1S3X5H7_TOBAC Xylulose kinase OS=Nicotiana tabacum OX=4097 GN=LOC107761269 PE=3 SV=1	2	1	1	9.1	7.3	7.3	5.0836	0	0	21560000	0	0	28169000	13962000	12749000	0	12951000	34729000	13233000	0	0	0	0	0	0	0	0	0	0	0	0	1
tr|A0A1S4DAX9|A0A1S4DAX9_TOBAC;tr|A0A1S3X5M2|A0A1S3X5M2_TOBAC	tr|A0A1S4DAX9|A0A1S4DAX9_TOBAC sulfate transporter 1.3-like OS=Nicotiana tabacum OX=4097 GN=LOC107827895 PE=3 SV=1;tr|A0A1S3X5M2|A0A1S3X5M2_TOBAC sulfate transporter 1.3-like OS=Nicotiana tabacum OX=4097 GN=LOC107761432 PE=3 SV=1	1	1	1	4.1	4.1	4.1	2.7742	19828000	0	14443000	0	0	50425000	25117000	21347000	35101000	0	36659000	0	0	0	0	0	0	0	0	0	0	0	0	0	1
tr|A0A1S3X5U6|A0A1S3X5U6_TOBAC;tr|A0A1S3ZAT8|A0A1S3ZAT8_TOBAC;tr|A0A1S3ZBA0|A0A1S3ZBA0_TOBAC;tr|A0A1S3ZAK7|A0A1S3ZAK7_TOBAC;tr|A0A1S4B818|A0A1S4B818_TOBAC	tr|A0A1S3X5U6|A0A1S3X5U6_TOBAC disease resistance protein RPP13-like OS=Nicotiana tabacum OX=4097 GN=LOC107761370 PE=4 SV=1;tr|A0A1S3ZAT8|A0A1S3ZAT8_TOBAC disease resistance protein RPP13-like isoform X2 OS=Nicotiana tabacum OX=4097 GN=LOC107784823 PE=4 SV	1	1	1	2.2	2.2	2.2	4.1725	9195800	9573700	7078100	0	0	18532000	11128000	8546800	22827000	15209000	25636000	14731000	0	0	0	0	0	0	0	0	0	0	0	0	5
tr|A0A1S4CS12|A0A1S4CS12_TOBAC;tr|A0A1S3X5X6|A0A1S3X5X6_TOBAC	tr|A0A1S4CS12|A0A1S4CS12_TOBAC thioredoxin-like protein HCF164, chloroplastic OS=Nicotiana tabacum OX=4097 GN=LOC107821939 PE=4 SV=1;tr|A0A1S3X5X6|A0A1S3X5X6_TOBAC thioredoxin-like protein HCF164, chloroplastic OS=Nicotiana tabacum OX=4097 GN=LOC107761531	1	1	1	4.5	4.5	4.5	2.8614	45683000	358460000	59876000	0	80779000	37773000	40026000	15365000	189830000	55843000	78726000	18873000	0	0	0	0	0	0	0	0	0	0	0	0	2
tr|A0A1S3X5Y9|A0A1S3X5Y9_TOBAC;tr|A0A1S3XZR6|A0A1S3XZR6_TOBAC	tr|A0A1S3X5Y9|A0A1S3X5Y9_TOBAC 60S ribosomal protein L37a OS=Nicotiana tabacum OX=4097 GN=LOC107761416 PE=3 SV=1;tr|A0A1S3XZR6|A0A1S3XZR6_TOBAC 60S ribosomal protein L37a-like OS=Nicotiana tabacum OX=4097 GN=LOC107770536 PE=3 SV=1	3	3	3	34.8	34.8	34.8	62.839	716340000	1247700000	489930000	581830000	1895100000	2194900000	926610000	470980000	1183600000	1611300000	1575900000	373170000	425620000	393960000	468580000	638460000	751980000	681590000	473680000	407340000	447680000	571450000	489330000	364080000	27
tr|A0A1S4CQ81|A0A1S4CQ81_TOBAC;tr|A0A1S3X5Z4|A0A1S3X5Z4_TOBAC	tr|A0A1S4CQ81|A0A1S4CQ81_TOBAC 2-methylene-furan-3-one reductase-like OS=Nicotiana tabacum OX=4097 GN=LOC107821492 PE=3 SV=1;tr|A0A1S3X5Z4|A0A1S3X5Z4_TOBAC 2-methylene-furan-3-one reductase OS=Nicotiana tabacum OX=4097 GN=LOC107761424 PE=3 SV=1	3	3	3	14.2	14.2	14.2	19.582	210470000	414870000	106340000	135640000	225630000	469930000	236390000	157750000	345810000	450980000	468570000	214350000	118080000	125010000	101630000	127380000	91176000	106400000	81407000	108260000	133360000	153370000	130160000	116840000	12
tr|A0A1S3X5Z8|A0A1S3X5Z8_TOBAC;tr|A0A1S3XUP9|A0A1S3XUP9_TOBAC	tr|A0A1S3X5Z8|A0A1S3X5Z8_TOBAC uncharacterized protein LOC107761618 OS=Nicotiana tabacum OX=4097 GN=LOC107761618 PE=4 SV=1;tr|A0A1S3XUP9|A0A1S3XUP9_TOBAC uncharacterized protein LOC107768935 OS=Nicotiana tabacum OX=4097 GN=LOC107768935 PE=4 SV=1	2	2	2	11.5	11.5	11.5	18.412	292080000	424310000	209550000	115910000	54873000	150490000	147330000	115570000	191150000	138090000	153610000	100040000	199640000	207780000	182990000	167360000	0	0	0	0	0	0	0	158290000	3
tr|A0A1S3X644|A0A1S3X644_TOBAC;tr|A0A1S4C4L7|A0A1S4C4L7_TOBAC	tr|A0A1S3X644|A0A1S3X644_TOBAC DEAD-box ATP-dependent RNA helicase 40-like OS=Nicotiana tabacum OX=4097 GN=LOC107761593 PE=4 SV=1;tr|A0A1S4C4L7|A0A1S4C4L7_TOBAC DEAD-box ATP-dependent RNA helicase 40-like OS=Nicotiana tabacum OX=4097 GN=LOC107815007 PE=4 S	4	3	3	4.5	3.6	3.6	11.405	11676000	101340000	13729000	11836000	56531000	23330000	0	33888000	21599000	77060000	113260000	21235000	0	0	0	0	0	0	0	0	0	0	0	0	3
tr|Q8W3P3|Q8W3P3_TOBAC;tr|Q9FV62|Q9FV62_TOBAC;tr|A0A1S4B7K7|A0A1S4B7K7_TOBAC;tr|A0A1S3X687|A0A1S3X687_TOBAC;tr|Q8W3P4|Q8W3P4_TOBAC	tr|Q8W3P3|Q8W3P3_TOBAC Guanine nucleotide-binding protein alpha subunit (Fragment) OS=Nicotiana tabacum OX=4097 GN=NtGA1 PE=3 SV=1;tr|Q9FV62|Q9FV62_TOBAC Guanine nucleotide-binding protein alpha subunit OS=Nicotiana tabacum OX=4097 PE=2 SV=1;tr|A0A1S4B7K7|	2	2	2	9.3	9.3	9.3	2.5822	0	123370000	0	21861000	0	80199000	0	25402000	0	0	55578000	72900000	0	0	0	0	0	0	0	0	0	0	0	0	2
tr|A0A1S3X6B4|A0A1S3X6B4_TOBAC	tr|A0A1S3X6B4|A0A1S3X6B4_TOBAC uncharacterized protein LOC107761715 OS=Nicotiana tabacum OX=4097 GN=LOC107761715 PE=4 SV=1	1	1	1	1.8	1.8	1.8	9.7198	33100000	255450000	0	38136000	112150000	73853000	45585000	33276000	57876000	74779000	147260000	29580000	0	0	0	0	0	0	0	0	0	0	0	0	7
tr|A0A1S3X6B5|A0A1S3X6B5_TOBAC;tr|A0A1S3WZS7|A0A1S3WZS7_TOBAC	tr|A0A1S3X6B5|A0A1S3X6B5_TOBAC uncharacterized protein LOC107761677 OS=Nicotiana tabacum OX=4097 GN=LOC107761677 PE=4 SV=1;tr|A0A1S3WZS7|A0A1S3WZS7_TOBAC uncharacterized protein LOC107759599 OS=Nicotiana tabacum OX=4097 GN=LOC107759599 PE=4 SV=1	2	2	2	4.9	4.9	4.9	2.7068	0	0	0	0	0	0	0	0	0	0	0	0	0	0	0	0	0	0	0	0	0	0	0	0	2
tr|A0A1S4C3F4|A0A1S4C3F4_TOBAC;tr|Q40567|Q40567_TOBAC;tr|A0A1S3X6X3|A0A1S3X6X3_TOBAC;tr|B5M6X8|B5M6X8_TOBAC;tr|A0A1S4C341|A0A1S4C341_TOBAC;tr|A0A1S3X6G9|A0A1S3X6G9_TOBAC	tr|A0A1S4C3F4|A0A1S4C3F4_TOBAC Calreticulin OS=Nicotiana tabacum OX=4097 GN=LOC107814655 PE=3 SV=1;tr|Q40567|Q40567_TOBAC Tobacco calretulin (Fragment) OS=Nicotiana tabacum OX=4097 PE=2 SV=1;tr|A0A1S3X6X3|A0A1S3X6X3_TOBAC Calreticulin OS=Nicotiana tabacum	2	2	2	5	5	5	4.1375	26753000	0	36050000	0	45820000	156810000	0	10461000	308330000	123030000	148430000	30724000	0	0	0	0	0	58607000	0	0	143390000	22260000	0	0	7
tr|A0A1S4CMU5|A0A1S4CMU5_TOBAC;tr|A0A1S3YJB0|A0A1S3YJB0_TOBAC;tr|A0A1S3YIV7|A0A1S3YIV7_TOBAC;tr|A0A1S4BSE1|A0A1S4BSE1_TOBAC;tr|A0A1S3YIH9|A0A1S3YIH9_TOBAC;tr|A0A1S3YJ13|A0A1S3YJ13_TOBAC;tr|A0A1S3XMB9|A0A1S3XMB9_TOBAC;tr|A0A1S3X6K0|A0A1S3X6K0_TOBAC;tr|A0A1S4BSB5|A0A1S4BSB5_TOBAC;tr|A0A1S4BSB9|A0A1S4BSB9_TOBAC;tr|A0A1S4D883|A0A1S4D883_TOBAC;tr|A0A1S4AKR5|A0A1S4AKR5_TOBAC	tr|A0A1S4CMU5|A0A1S4CMU5_TOBAC ABC transporter B family member 10-like OS=Nicotiana tabacum OX=4097 GN=LOC107820502 PE=4 SV=1;tr|A0A1S3YJB0|A0A1S3YJB0_TOBAC ABC transporter B family member 21-like isoform X4 OS=Nicotiana tabacum OX=4097 GN=LOC107776638 PE=	1	1	1	6.5	6.5	6.5	9.5966	175950000	0	44416000	47943000	257450000	207060000	66240000	63420000	228250000	218760000	166390000	35194000	0	0	0	0	0	0	0	0	0	0	0	0	2
tr|A0A1S3XHA6|A0A1S3XHA6_TOBAC;tr|A0A1S3X6N4|A0A1S3X6N4_TOBAC	tr|A0A1S3XHA6|A0A1S3XHA6_TOBAC GDSL esterase/lipase At1g29670-like OS=Nicotiana tabacum OX=4097 GN=LOC107765206 PE=3 SV=1;tr|A0A1S3X6N4|A0A1S3X6N4_TOBAC GDSL esterase/lipase At1g29670-like OS=Nicotiana tabacum OX=4097 GN=LOC107761814 PE=3 SV=1	1	1	1	3.9	3.9	3.9	3.1059	4946700	4199300	3638900	1902100	0	0	2143900	0	0	0	0	3368100	0	0	0	0	0	0	0	0	0	0	0	0	2
tr|A0A1S3Z1V9|A0A1S3Z1V9_TOBAC;tr|A0A1S3X706|A0A1S3X706_TOBAC;tr|A0A1S3Z236|A0A1S3Z236_TOBAC;tr|A0A1S3Z2P1|A0A1S3Z2P1_TOBAC;tr|A0A1S3Z1S2|A0A1S3Z1S2_TOBAC;tr|A0A1S3Z1X8|A0A1S3Z1X8_TOBAC	tr|A0A1S3Z1V9|A0A1S3Z1V9_TOBAC phosphoglucomutase (alpha-D-glucose-1,6-bisphosphate-dependent) OS=Nicotiana tabacum OX=4097 GN=LOC107782098 PE=3 SV=1;tr|A0A1S3X706|A0A1S3X706_TOBAC phosphoglucomutase (alpha-D-glucose-1,6-bisphosphate-dependent) OS=Nicotian	4	4	4	8.6	8.6	8.6	14.163	97399000	274820000	115160000	72124000	144940000	224140000	118900000	65723000	249300000	318410000	124300000	88842000	77985000	75249000	51583000	33016000	147870000	132150000	90853000	57920000	143630000	139320000	108120000	0	17
tr|A0A1S3X711|A0A1S3X711_TOBAC;tr|A0A1S4DJD1|A0A1S4DJD1_TOBAC	tr|A0A1S3X711|A0A1S3X711_TOBAC Phosphoribulokinase OS=Nicotiana tabacum OX=4097 GN=LOC107761746 PE=3 SV=1;tr|A0A1S4DJD1|A0A1S4DJD1_TOBAC Phosphoribulokinase OS=Nicotiana tabacum OX=4097 GN=LOC107830375 PE=3 SV=1	8	1	1	30.8	3.4	3.4	3.1627	0	0	0	0	0	0	0	10233000	0	0	0	0	0	0	0	0	0	0	0	0	0	0	0	0	1
tr|A0A1S3YCF1|A0A1S3YCF1_TOBAC;tr|A0A1S3YCI0|A0A1S3YCI0_TOBAC;tr|A0A1S3X719|A0A1S3X719_TOBAC	tr|A0A1S3YCF1|A0A1S3YCF1_TOBAC non-specific serine/threonine protein kinase OS=Nicotiana tabacum OX=4097 GN=LOC107774785 PE=3 SV=1;tr|A0A1S3YCI0|A0A1S3YCI0_TOBAC non-specific serine/threonine protein kinase OS=Nicotiana tabacum OX=4097 GN=LOC107774785 PE=3	4	4	4	10.4	10.4	10.4	12.234	85782000	122660000	59373000	51912000	225160000	221470000	124430000	58429000	152000000	164300000	165460000	58171000	24513000	0	36873000	23941000	96518000	77884000	59664000	68304000	45950000	93509000	42240000	28464000	22
tr|A0A1S3X7A0|A0A1S3X7A0_TOBAC;tr|A0A1S3YUW5|A0A1S3YUW5_TOBAC	tr|A0A1S3X7A0|A0A1S3X7A0_TOBAC 40S ribosomal protein S9-2 OS=Nicotiana tabacum OX=4097 GN=LOC107761978 PE=3 SV=1;tr|A0A1S3YUW5|A0A1S3YUW5_TOBAC 40S ribosomal protein S9 OS=Nicotiana tabacum OX=4097 GN=LOC107779838 PE=3 SV=1	13	1	1	52.3	4.6	4.6	3.7819	36331000	70844000	35902000	33812000	71639000	78734000	38232000	41513000	37409000	79664000	87455000	19614000	0	0	0	0	0	0	0	0	0	0	0	0	5
tr|A0A1S3X7C1|A0A1S3X7C1_TOBAC;tr|I2FJN7|I2FJN7_TOBAC;tr|Q9M6E4|Q9M6E4_TOBAC	tr|A0A1S3X7C1|A0A1S3X7C1_TOBAC Polyadenylate-binding protein OS=Nicotiana tabacum OX=4097 GN=LOC107761991 PE=3 SV=1;tr|I2FJN7|I2FJN7_TOBAC Polyadenylate-binding protein OS=Nicotiana tabacum OX=4097 GN=PABP PE=2 SV=1;tr|Q9M6E4|Q9M6E4_TOBAC Poly(A)-binding p	3	2	2	3.8	2.4	2.4	4.1835	8012100	69427000	17181000	0	18030000	46149000	0	9381000	38225000	66660000	60072000	13078000	0	0	0	0	0	0	0	0	0	0	0	0	2
tr|A0A1S4A8Q6|A0A1S4A8Q6_TOBAC;tr|A0A1S3X7E1|A0A1S3X7E1_TOBAC	tr|A0A1S4A8Q6|A0A1S4A8Q6_TOBAC 50S ribosomal protein L4-like OS=Nicotiana tabacum OX=4097 GN=LOC107794981 PE=3 SV=1;tr|A0A1S3X7E1|A0A1S3X7E1_TOBAC 50S ribosomal protein L4-like OS=Nicotiana tabacum OX=4097 GN=LOC107762007 PE=3 SV=1	2	2	2	8.1	8.1	8.1	6.4694	23677000	37283000	0	13749000	34279000	125870000	74709000	37436000	44470000	42122000	42994000	0	0	0	0	0	0	0	0	0	0	0	0	0	9
tr|A0A1S3X7F3|A0A1S3X7F3_TOBAC;tr|A0A1S4CBP2|A0A1S4CBP2_TOBAC;tr|A0A1S4A0G1|A0A1S4A0G1_TOBAC	tr|A0A1S3X7F3|A0A1S3X7F3_TOBAC rhodanese-like domain-containing protein 9, chloroplastic OS=Nicotiana tabacum OX=4097 GN=LOC107761899 PE=4 SV=1;tr|A0A1S4CBP2|A0A1S4CBP2_TOBAC rhodanese-like domain-containing protein 9, chloroplastic OS=Nicotiana tabacum OX	1	1	1	6.7	6.7	6.7	2.3574	21136000	58645000	22527000	17122000	38303000	127190000	16912000	20398000	98644000	90610000	0	0	0	0	0	0	0	0	0	0	0	0	0	0	4
tr|A0A1S3X7H4|A0A1S3X7H4_TOBAC;tr|A0A1S3YUN7|A0A1S3YUN7_TOBAC;tr|A0A1S3Y1I0|A0A1S3Y1I0_TOBAC;tr|A0A1S3X501|A0A1S3X501_TOBAC	tr|A0A1S3X7H4|A0A1S3X7H4_TOBAC 40S ribosomal protein S16-like OS=Nicotiana tabacum OX=4097 GN=LOC107762148 PE=3 SV=1;tr|A0A1S3YUN7|A0A1S3YUN7_TOBAC 40S ribosomal protein S16-like OS=Nicotiana tabacum OX=4097 GN=LOC107779727 PE=3 SV=1;tr|A0A1S3Y1I0|A0A1S3Y1	7	7	1	50.3	50.3	8.8	116.89	3394600000	4525500000	3394500000	2348200000	3542600000	4245400000	2165900000	1166600000	4203300000	5542400000	4816500000	2399800000	1731100000	1946700000	1871400000	1657700000	2732300000	2318100000	2272000000	2394500000	1808200000	3324400000	2561000000	1999400000	119
tr|A0A1S3X7I1|A0A1S3X7I1_TOBAC;tr|A0A1S3XXQ1|A0A1S3XXQ1_TOBAC;tr|A0A1S4DPR4|A0A1S4DPR4_TOBAC;tr|A0A1S4B3V7|A0A1S4B3V7_TOBAC;tr|A0A1S3Y679|A0A1S3Y679_TOBAC;tr|A0A1S3Y2G9|A0A1S3Y2G9_TOBAC	tr|A0A1S3X7I1|A0A1S3X7I1_TOBAC uncharacterized protein LOC107762051 OS=Nicotiana tabacum OX=4097 GN=LOC107762051 PE=4 SV=1;tr|A0A1S3XXQ1|A0A1S3XXQ1_TOBAC uncharacterized protein LOC107769906 OS=Nicotiana tabacum OX=4097 GN=LOC107769906 PE=4 SV=1;tr|A0A1S4D	1	1	1	1.3	1.3	1.3	2.2588	0	0	0	0	0	0	0	0	31813000	0	0	0	0	0	0	0	0	0	0	0	0	0	0	0	1
tr|A0A1S3ZAK6|A0A1S3ZAK6_TOBAC;tr|A0A1S3Z5T0|A0A1S3Z5T0_TOBAC;tr|A0A1S3XQF4|A0A1S3XQF4_TOBAC;tr|A0A1S3X7K7|A0A1S3X7K7_TOBAC	tr|A0A1S3ZAK6|A0A1S3ZAK6_TOBAC ATP synthase subunit d, mitochondrial OS=Nicotiana tabacum OX=4097 GN=LOC107784751 PE=3 SV=1;tr|A0A1S3Z5T0|A0A1S3Z5T0_TOBAC ATP synthase subunit d, mitochondrial OS=Nicotiana tabacum OX=4097 GN=LOC107783110 PE=3 SV=1;tr|A0A1S	5	5	5	31	31	31	14.262	96601000	302700000	45589000	53120000	81858000	285280000	83202000	56439000	572560000	221830000	373240000	61477000	39069000	92521000	50332000	65234000	33113000	60177000	38748000	75934000	153340000	64751000	86926000	49659000	21
tr|A0A1S3X7M0|A0A1S3X7M0_TOBAC;tr|A0A1S3XRT7|A0A1S3XRT7_TOBAC	tr|A0A1S3X7M0|A0A1S3X7M0_TOBAC ATP synthase subunit gamma, mitochondrial OS=Nicotiana tabacum OX=4097 GN=LOC107762073 PE=3 SV=1;tr|A0A1S3XRT7|A0A1S3XRT7_TOBAC ATP synthase subunit gamma, mitochondrial-like OS=Nicotiana tabacum OX=4097 GN=LOC107768003 PE=3	12	12	2	56.1	56.1	12.8	323.31	2975400000	3882000000	2352000000	2023000000	5717000000	6424500000	3998800000	2162100000	5042100000	4124900000	4866900000	2760800000	615150000	357990000	809380000	814350000	684310000	515900000	718860000	859590000	588520000	420730000	440920000	936730000	178
tr|A0A1S3X7S2|A0A1S3X7S2_TOBAC;tr|A0A1S4B5J6|A0A1S4B5J6_TOBAC;tr|A0A1S3YAI1|A0A1S3YAI1_TOBAC	tr|A0A1S3X7S2|A0A1S3X7S2_TOBAC Pre-mRNA cleavage factor Im 25 kDa subunit OS=Nicotiana tabacum OX=4097 GN=LOC107762129 PE=3 SV=1;tr|A0A1S4B5J6|A0A1S4B5J6_TOBAC Pre-mRNA cleavage factor Im 25 kDa subunit OS=Nicotiana tabacum OX=4097 GN=LOC107804660 PE=3 SV=	2	2	2	21.5	21.5	21.5	6.2781	121110000	128820000	57985000	69175000	176310000	201860000	119720000	37081000	157210000	93840000	137680000	105050000	0	0	0	0	0	0	0	0	0	0	0	0	4
tr|A0A1S3X7T0|A0A1S3X7T0_TOBAC;tr|A0A1S4ANR5|A0A1S4ANR5_TOBAC;tr|A0A1S3XBM4|A0A1S3XBM4_TOBAC	tr|A0A1S3X7T0|A0A1S3X7T0_TOBAC phosphoenolpyruvate carboxylase OS=Nicotiana tabacum OX=4097 GN=LOC107762239 PE=3 SV=1;tr|A0A1S4ANR5|A0A1S4ANR5_TOBAC phosphoenolpyruvate carboxylase OS=Nicotiana tabacum OX=4097 GN=LOC107799672 PE=3 SV=1;tr|A0A1S3XBM4|A0A1S3	14	3	0	18	5.2	0	8.0943	92208000	0	0	25473000	80914000	0	85829000	20881000	222670000	155780000	136730000	40955000	0	0	0	0	0	0	0	0	0	0	0	0	3
tr|A0A1S3YGR6|A0A1S3YGR6_TOBAC;tr|A0A1S3X815|A0A1S3X815_TOBAC	tr|A0A1S3YGR6|A0A1S3YGR6_TOBAC aspartic proteinase Asp1-like OS=Nicotiana tabacum OX=4097 GN=LOC107776126 PE=3 SV=1;tr|A0A1S3X815|A0A1S3X815_TOBAC aspartic proteinase Asp1-like OS=Nicotiana tabacum OX=4097 GN=LOC107762208 PE=3 SV=1	1	1	1	3.4	3.4	3.4	4.1527	46494000	42357000	18072000	20145000	29307000	24132000	21452000	8720800	49369000	19532000	31839000	14667000	0	0	0	0	0	0	0	0	0	0	0	0	2
tr|A0A1S3X839|A0A1S3X839_TOBAC	tr|A0A1S3X839|A0A1S3X839_TOBAC 60S ribosomal protein L34-like OS=Nicotiana tabacum OX=4097 GN=LOC107762102 PE=3 SV=1	2	1	1	22.6	15.1	15.1	6.5181	38324000	170560000	24206000	30602000	87408000	127990000	0	0	74103000	74494000	71870000	11886000	0	0	0	0	0	0	0	0	0	0	0	0	10
tr|A0A1S3Y9V0|A0A1S3Y9V0_TOBAC;tr|A0A1S3X843|A0A1S3X843_TOBAC	tr|A0A1S3Y9V0|A0A1S3Y9V0_TOBAC uncharacterized protein LOC107774098 OS=Nicotiana tabacum OX=4097 GN=LOC107774098 PE=4 SV=1;tr|A0A1S3X843|A0A1S3X843_TOBAC uncharacterized protein LOC107762231 OS=Nicotiana tabacum OX=4097 GN=LOC107762231 PE=4 SV=1	2	2	2	9.7	9.7	9.7	8.0431	89529000	299910000	38300000	33244000	87560000	168930000	108780000	29806000	161820000	137260000	157910000	43582000	58563000	89988000	48916000	47017000	46444000	56909000	63596000	45614000	62502000	51900000	47503000	51037000	2
tr|A0A1S3X844|A0A1S3X844_TOBAC;tr|A0A1S4D1B7|A0A1S4D1B7_TOBAC;tr|A0A1S4AL58|A0A1S4AL58_TOBAC;tr|A0A1S4A1R7|A0A1S4A1R7_TOBAC;tr|A0A1S4D1N2|A0A1S4D1N2_TOBAC;tr|A0A1S4D1D0|A0A1S4D1D0_TOBAC;tr|A0A1S4D1F9|A0A1S4D1F9_TOBAC;tr|A0A1S4D8I4|A0A1S4D8I4_TOBAC	tr|A0A1S3X844|A0A1S3X844_TOBAC uncharacterized protein LOC107762107 OS=Nicotiana tabacum OX=4097 GN=LOC107762107 PE=3 SV=1;tr|A0A1S4D1B7|A0A1S4D1B7_TOBAC uncharacterized protein LOC107824930 isoform X4 OS=Nicotiana tabacum OX=4097 GN=LOC107824930 PE=3 SV=1	2	2	2	14.6	14.6	14.6	9.2182	90098000	66683000	83402000	112990000	160520000	229860000	91035000	92877000	109820000	72267000	124810000	79741000	61446000	0	74958000	141510000	68673000	69638000	61454000	76737000	53938000	0	51128000	81319000	5
tr|A0A1S4D8B6|A0A1S4D8B6_TOBAC;tr|A0A1S3X879|A0A1S3X879_TOBAC	tr|A0A1S4D8B6|A0A1S4D8B6_TOBAC L-cysteine desulfhydrase-like OS=Nicotiana tabacum OX=4097 GN=LOC107827141 PE=4 SV=1;tr|A0A1S3X879|A0A1S3X879_TOBAC L-cysteine desulfhydrase-like OS=Nicotiana tabacum OX=4097 GN=LOC107762255 PE=4 SV=1	2	2	2	10.6	10.6	10.6	51.201	29726000	28665000	17489000	27064000	693360	31526000	34189000	0	28078000	1331400	1030000	0	0	0	0	0	0	21052000	24567000	0	19908000	0	0	0	4
tr|A0A1S3X8D5|A0A1S3X8D5_TOBAC;tr|A0A1S4DE38|A0A1S4DE38_TOBAC;tr|A0A1S4AHS0|A0A1S4AHS0_TOBAC	tr|A0A1S3X8D5|A0A1S3X8D5_TOBAC basic leucine zipper and W2 domain-containing protein 2-like OS=Nicotiana tabacum OX=4097 GN=LOC107762222 PE=3 SV=1;tr|A0A1S4DE38|A0A1S4DE38_TOBAC basic leucine zipper and W2 domain-containing protein 1-like OS=Nicotiana taba	2	2	2	10.9	10.9	10.9	14.089	69639000	70919000	49785000	47334000	52627000	136050000	107280000	71110000	159900000	84377000	132920000	98423000	51426000	45580000	64694000	60742000	40200000	42113000	62071000	80424000	62493000	54492000	51672000	73953000	14
tr|A0A1S4BTZ6|A0A1S4BTZ6_TOBAC;tr|A0A1S3X8F1|A0A1S3X8F1_TOBAC	tr|A0A1S4BTZ6|A0A1S4BTZ6_TOBAC NADH dehydrogenase [ubiquinone] 1 alpha subcomplex subunit 9, mitochondrial OS=Nicotiana tabacum OX=4097 GN=LOC107811871 PE=4 SV=1;tr|A0A1S3X8F1|A0A1S3X8F1_TOBAC NADH dehydrogenase [ubiquinone] 1 alpha subcomplex subunit 9, m	1	1	1	4.5	4.5	4.5	3.408	11927000	0	5430100	7048000	8904600	9777400	0	7404400	37832000	19273000	32467000	5047100	0	0	0	0	0	0	0	0	0	0	0	0	2
tr|A0A1S3X8I3|A0A1S3X8I3_TOBAC	tr|A0A1S3X8I3|A0A1S3X8I3_TOBAC (+)-neomenthol dehydrogenase-like isoform X1 OS=Nicotiana tabacum OX=4097 GN=LOC107762361 PE=3 SV=1	1	1	1	2.5	2.5	2.5	2.4992	410790000	4408100000	492570000	396330000	1993500000	1823500000	1673300000	431150000	4078600000	4267900000	3361300000	1079600000	0	0	0	0	0	0	0	0	0	0	0	0	20
tr|A0A1S4D8R1|A0A1S4D8R1_TOBAC;tr|A0A1S3ZKY4|A0A1S3ZKY4_TOBAC;tr|A0A1S3X8M8|A0A1S3X8M8_TOBAC;tr|A0A1S4ASW6|A0A1S4ASW6_TOBAC	tr|A0A1S4D8R1|A0A1S4D8R1_TOBAC protein transport protein Sec24-like CEF OS=Nicotiana tabacum OX=4097 GN=LOC107827176 PE=3 SV=1;tr|A0A1S3ZKY4|A0A1S3ZKY4_TOBAC protein transport protein Sec24-like CEF OS=Nicotiana tabacum OX=4097 GN=LOC107787821 PE=4 SV=1;tr	1	1	1	2.4	2.4	2.4	2.4368	9499900	0	9590300	0	15665000	21335000	12494000	2936700	28614000	28626000	29155000	5265500	0	0	0	0	0	0	0	0	0	0	0	0	2
tr|A0A1S4AQT5|A0A1S4AQT5_TOBAC;tr|A0A1S3X8N0|A0A1S3X8N0_TOBAC	tr|A0A1S4AQT5|A0A1S4AQT5_TOBAC exocyst complex component EXO84B-like OS=Nicotiana tabacum OX=4097 GN=LOC107800394 PE=3 SV=1;tr|A0A1S3X8N0|A0A1S3X8N0_TOBAC exocyst complex component EXO84B-like OS=Nicotiana tabacum OX=4097 GN=LOC107762396 PE=3 SV=1	1	1	1	2.1	2.1	2.1	4.8753	20112000	28318000	12445000	6985600	17345000	22667000	8541000	13150000	20276000	17733000	28758000	8617400	0	0	0	0	0	0	0	0	0	0	0	0	6
tr|A0A1S3X8Q5|A0A1S3X8Q5_TOBAC	tr|A0A1S3X8Q5|A0A1S3X8Q5_TOBAC 50S ribosomal protein L10, chloroplastic-like OS=Nicotiana tabacum OX=4097 GN=LOC107762422 PE=3 SV=1	8	8	3	44.5	44.5	18.5	82.057	737790000	2152800000	536280000	757230000	1184100000	1458700000	939560000	416640000	896690000	1206700000	1257500000	439660000	135530000	266640000	178960000	256570000	201450000	181420000	220320000	183510000	146010000	195300000	160880000	159120000	49
tr|A0A1S4AI39|A0A1S4AI39_TOBAC;tr|A0A1S3X8T3|A0A1S3X8T3_TOBAC;tr|A0A1S3ZZF5|A0A1S3ZZF5_TOBAC;tr|A0A1S3ZZI7|A0A1S3ZZI7_TOBAC	tr|A0A1S4AI39|A0A1S4AI39_TOBAC DEAD-box ATP-dependent RNA helicase 8-like OS=Nicotiana tabacum OX=4097 GN=LOC107797871 PE=3 SV=1;tr|A0A1S3X8T3|A0A1S3X8T3_TOBAC DEAD-box ATP-dependent RNA helicase 8-like OS=Nicotiana tabacum OX=4097 GN=LOC107762362 PE=3 SV=	8	8	8	22.2	22.2	22.2	123.89	1016600000	1276900000	491200000	608170000	1783600000	1146700000	708500000	325420000	1147100000	1142700000	1453300000	635250000	376410000	191910000	226100000	300870000	350200000	195000000	227970000	229740000	241340000	213320000	195690000	348680000	59
tr|A0A1S3X8Z6|A0A1S3X8Z6_TOBAC	tr|A0A1S3X8Z6|A0A1S3X8Z6_TOBAC heat shock cognate 70 kDa protein 2-like OS=Nicotiana tabacum OX=4097 GN=LOC107762521 PE=3 SV=1	24	1	0	48.5	1.7	0	3.6161	10657000	76458000	13359000	7655500	22706000	60028000	24403000	4155900	17734000	60363000	43422000	0	0	0	0	0	0	0	0	0	0	0	0	0	6
tr|A0A1S4BWM2|A0A1S4BWM2_TOBAC;tr|A0A1S3X919|A0A1S3X919_TOBAC	tr|A0A1S4BWM2|A0A1S4BWM2_TOBAC heterogeneous nuclear ribonucleoprotein F-like OS=Nicotiana tabacum OX=4097 GN=LOC107812664 PE=4 SV=1;tr|A0A1S3X919|A0A1S3X919_TOBAC heterogeneous nuclear ribonucleoprotein H2-like OS=Nicotiana tabacum OX=4097 GN=LOC107762413	4	4	4	15.9	15.9	15.9	11.22	43832000	106060000	55002000	15546000	191550000	282210000	122500000	68716000	210680000	199580000	236370000	61241000	0	0	49607000	0	60357000	0	47692000	56632000	49737000	66472000	47096000	46942000	7
tr|A0A1S3X935|A0A1S3X935_TOBAC	tr|A0A1S3X935|A0A1S3X935_TOBAC two-component response regulator ARR14-like OS=Nicotiana tabacum OX=4097 GN=LOC107762433 PE=4 SV=1	1	1	1	4	4	4	2.7074	16058000	69169000	17867000	20148000	0	22295000	0	0	43687000	39205000	40764000	13945000	0	0	0	0	0	0	0	0	0	0	0	0	1
tr|A0A1S3X991|A0A1S3X991_TOBAC	tr|A0A1S3X991|A0A1S3X991_TOBAC RNA-binding protein Musashi homolog 2-like OS=Nicotiana tabacum OX=4097 GN=LOC107762486 PE=4 SV=1	1	1	1	3.5	3.5	3.5	3.9748	264100000	526090000	196230000	159920000	532220000	546740000	310590000	165850000	587000000	478960000	669570000	238540000	0	0	0	0	0	0	0	0	0	0	0	0	2
tr|A0A1S3X9A7|A0A1S3X9A7_TOBAC	tr|A0A1S3X9A7|A0A1S3X9A7_TOBAC coatomer subunit beta-2-like OS=Nicotiana tabacum OX=4097 GN=LOC107762632 PE=4 SV=1	5	1	1	23.9	3	3	8.2089	3289000	25684000	12280000	623690	132950000	67660000	27431000	3643100	43424000	78042000	60831000	0	0	0	0	0	0	0	0	0	0	0	0	0	7
tr|A0A1S4D6R7|A0A1S4D6R7_TOBAC;tr|A0A1S3X9G6|A0A1S3X9G6_TOBAC;tr|A0A1S3X9E2|A0A1S3X9E2_TOBAC	tr|A0A1S4D6R7|A0A1S4D6R7_TOBAC Glucose-1-phosphate adenylyltransferase OS=Nicotiana tabacum OX=4097 GN=LOC107826565 PE=3 SV=1;tr|A0A1S3X9G6|A0A1S3X9G6_TOBAC Glucose-1-phosphate adenylyltransferase OS=Nicotiana tabacum OX=4097 GN=LOC107762694 PE=3 SV=1;tr|A	3	2	2	6.8	4.9	4.9	13.281	51148000	162930000	32967000	31449000	122280000	86914000	0	9805500	44023000	57869000	84143000	28188000	0	0	0	0	0	0	0	0	0	0	0	0	8
tr|Q8LNZ4|Q8LNZ4_TOBAC;tr|A0A1S3X9G5|A0A1S3X9G5_TOBAC;tr|A0A1S3YJQ9|A0A1S3YJQ9_TOBAC;tr|A0A1S3YJG9|A0A1S3YJG9_TOBAC;tr|A0A1S3X9U2|A0A1S3X9U2_TOBAC;tr|A0A1S3YIW3|A0A1S3YIW3_TOBAC	tr|Q8LNZ4|Q8LNZ4_TOBAC Tobacco nucleolin OS=Nicotiana tabacum OX=4097 GN=NNF1 PE=2 SV=1;tr|A0A1S3X9G5|A0A1S3X9G5_TOBAC nucleolin 1-like isoform X2 OS=Nicotiana tabacum OX=4097 GN=LOC107762714 PE=4 SV=1;tr|A0A1S3YJQ9|A0A1S3YJQ9_TOBAC nucleolin 1-like isofor	11	11	11	22.3	22.3	22.3	323.31	947660000	6975000000	2151500000	1496800000	3308400000	6736000000	2851400000	1033000000	4598600000	5172900000	8039800000	1745600000	236400000	1308100000	903540000	515820000	808940000	862640000	821010000	451660000	788590000	1105900000	1276800000	762290000	111
tr|A0A1S3XY09|A0A1S3XY09_TOBAC;tr|A0A1S3XI33|A0A1S3XI33_TOBAC;tr|A0A1S4DFT6|A0A1S4DFT6_TOBAC;tr|A0A1S3X9H3|A0A1S3X9H3_TOBAC	tr|A0A1S3XY09|A0A1S3XY09_TOBAC peroxisome biogenesis protein 22-like OS=Nicotiana tabacum OX=4097 GN=LOC107769851 PE=4 SV=1;tr|A0A1S3XI33|A0A1S3XI33_TOBAC peroxisome biogenesis protein 22-like OS=Nicotiana tabacum OX=4097 GN=LOC107765434 PE=4 SV=1;tr|A0A1S	1	1	1	4.5	4.5	4.5	4.1707	33204000	21040000	17441000	17962000	32399000	31398000	12892000	18448000	26985000	35923000	26368000	14732000	0	0	0	0	0	0	0	0	0	0	0	0	9
tr|A0A1S4CR56|A0A1S4CR56_TOBAC;tr|A0A1S3X9R8|A0A1S3X9R8_TOBAC	tr|A0A1S4CR56|A0A1S4CR56_TOBAC probable alpha,alpha-trehalose-phosphate synthase [UDP-forming] 7 OS=Nicotiana tabacum OX=4097 GN=LOC107821671 PE=3 SV=1;tr|A0A1S3X9R8|A0A1S3X9R8_TOBAC probable alpha,alpha-trehalose-phosphate synthase [UDP-forming] 7 OS=Nico	5	5	2	5.8	5.8	2.9	51.201	171700000	343770000	139480000	104600000	241870000	229600000	205320000	112180000	175640000	141260000	176860000	103720000	76229000	97649000	91193000	80566000	99085000	75266000	129310000	166400000	57339000	48299000	49351000	134340000	14
tr|A0A1S3Z0C6|A0A1S3Z0C6_TOBAC;tr|A0A1S3X9S3|A0A1S3X9S3_TOBAC	tr|A0A1S3Z0C6|A0A1S3Z0C6_TOBAC calmodulin-binding receptor-like cytoplasmic kinase 2 OS=Nicotiana tabacum OX=4097 GN=LOC107781676 PE=3 SV=1;tr|A0A1S3X9S3|A0A1S3X9S3_TOBAC calmodulin-binding receptor-like cytoplasmic kinase 2 OS=Nicotiana tabacum OX=4097 GN	2	2	2	8	8	8	3.7	9838400	24639000	7862600	5065400	6657000	16050000	5521600	3871800	5490200	0	4879200	1673200	0	0	0	0	0	0	0	0	0	0	0	0	2
tr|Q9ZP50|Q9ZP50_TOBAC;tr|A0A1S3X9U6|A0A1S3X9U6_TOBAC	tr|Q9ZP50|Q9ZP50_TOBAC FtsH-like protein Pftf OS=Nicotiana tabacum OX=4097 GN=Pftf PE=2 SV=1;tr|A0A1S3X9U6|A0A1S3X9U6_TOBAC ATP-dependent zinc metalloprotease FTSH 2, chloroplastic OS=Nicotiana tabacum OX=4097 GN=LOC107762804 PE=3 SV=1	18	18	17	38.8	38.8	37.1	154.91	2821000000	5243900000	1439500000	1402400000	2681900000	3439100000	1347600000	975110000	3015600000	2811100000	3344900000	1003100000	564150000	576510000	452050000	431540000	393880000	408550000	249390000	294440000	387110000	337030000	415190000	326130000	123
tr|A0A1S4DD40|A0A1S4DD40_TOBAC;tr|A0A1S3X9V4|A0A1S3X9V4_TOBAC	tr|A0A1S4DD40|A0A1S4DD40_TOBAC pentatricopeptide repeat-containing protein At3g56030-like OS=Nicotiana tabacum OX=4097 GN=LOC107828542 PE=3 SV=1;tr|A0A1S3X9V4|A0A1S3X9V4_TOBAC pentatricopeptide repeat-containing protein At3g56030-like OS=Nicotiana tabacum	1	1	1	5.8	5.8	5.8	16.6	0	79334000	49778000	0	100570000	18348000	5340800	0	16840000	0	9523200	5474500	0	33304000	75072000	0	36138000	0	0	0	0	0	0	0	4
tr|A0A1S4C0X2|A0A1S4C0X2_TOBAC;tr|A0A1S3X9Y9|A0A1S3X9Y9_TOBAC	tr|A0A1S4C0X2|A0A1S4C0X2_TOBAC Elongation factor Tu OS=Nicotiana tabacum OX=4097 GN=LOC107813892 PE=3 SV=1;tr|A0A1S3X9Y9|A0A1S3X9Y9_TOBAC Elongation factor Tu OS=Nicotiana tabacum OX=4097 GN=LOC107762844 PE=3 SV=1	12	3	3	36.7	11.3	11.3	9.3689	260010000	241790000	168060000	158160000	509660000	76719000	445820000	127510000	671910000	707020000	761700000	247620000	219950000	0	199870000	238760000	307610000	203120000	0	198250000	265510000	306490000	276400000	0	7
tr|A0A1S3XA26|A0A1S3XA26_TOBAC;tr|A0A1S4B3D9|A0A1S4B3D9_TOBAC	tr|A0A1S3XA26|A0A1S3XA26_TOBAC cysteine desulfurase OS=Nicotiana tabacum OX=4097 GN=LOC107762876 PE=3 SV=1;tr|A0A1S4B3D9|A0A1S4B3D9_TOBAC cysteine desulfurase OS=Nicotiana tabacum OX=4097 GN=LOC107804015 PE=3 SV=1	8	8	8	23.3	23.3	23.3	59.847	1058800000	1972900000	647420000	470200000	1495700000	1474100000	720540000	347180000	943780000	1316300000	1378100000	393460000	311940000	307950000	273130000	219810000	249030000	196530000	186700000	159590000	182060000	211160000	214150000	183960000	78
tr|A0A1S3XA73|A0A1S3XA73_TOBAC;tr|A0A1S3ZZ42|A0A1S3ZZ42_TOBAC	tr|A0A1S3XA73|A0A1S3XA73_TOBAC uncharacterized protein LOC107762950 OS=Nicotiana tabacum OX=4097 GN=LOC107762950 PE=4 SV=1;tr|A0A1S3ZZ42|A0A1S3ZZ42_TOBAC uncharacterized protein LOC107791969 OS=Nicotiana tabacum OX=4097 GN=LOC107791969 PE=4 SV=1	1	1	1	4.9	4.9	4.9	3.225	20625000	49803000	20289000	35382000	10097000	10598000	17611000	26680000	20431000	26676000	23474000	24253000	0	0	0	0	0	0	0	0	0	0	0	0	8
tr|A0A1S4B6X0|A0A1S4B6X0_TOBAC;tr|A0A1S3XA88|A0A1S3XA88_TOBAC	tr|A0A1S4B6X0|A0A1S4B6X0_TOBAC BTB/POZ and MATH domain-containing protein 2-like OS=Nicotiana tabacum OX=4097 GN=LOC107805142 PE=3 SV=1;tr|A0A1S3XA88|A0A1S3XA88_TOBAC BTB/POZ and MATH domain-containing protein 2-like OS=Nicotiana tabacum OX=4097 GN=LOC1077	1	1	1	3.9	3.9	3.9	6.6198	0	39552000	27016000	26943000	31350000	51216000	42880000	28358000	27539000	22471000	56749000	25259000	0	0	0	0	0	0	0	0	0	0	0	0	2
tr|A0A1S3XAG6|A0A1S3XAG6_TOBAC;tr|A0A1S3XBD3|A0A1S3XBD3_TOBAC	tr|A0A1S3XAG6|A0A1S3XAG6_TOBAC putative nicotine oxidoreductase OS=Nicotiana tabacum OX=4097 GN=LOC107763008 PE=4 SV=1;tr|A0A1S3XBD3|A0A1S3XBD3_TOBAC uncharacterized mitochondrial protein ymf11 OS=Nicotiana tabacum OX=4097 GN=LOC107763138 PE=4 SV=1	1	1	1	3	3	3	3.5652	38718000	139780000	20582000	26975000	27714000	16633000	0	0	28112000	22715000	24455000	11708000	0	0	0	0	0	0	0	0	0	0	0	0	2
tr|A0A1S3XAI9|A0A1S3XAI9_TOBAC;tr|A0A1S3ZE04|A0A1S3ZE04_TOBAC	tr|A0A1S3XAI9|A0A1S3XAI9_TOBAC ADP/ATP translocase OS=Nicotiana tabacum OX=4097 GN=LOC107763030 PE=3 SV=1;tr|A0A1S3ZE04|A0A1S3ZE04_TOBAC ADP/ATP translocase OS=Nicotiana tabacum OX=4097 GN=LOC107785678 PE=3 SV=1	15	15	6	44.6	44.6	13.2	237.36	31797000000	50197000000	24539000000	21870000000	34981000000	42940000000	22645000000	11820000000	29631000000	25695000000	38271000000	15873000000	6964600000	6082900000	7922800000	8242000000	6092800000	5084500000	5041400000	4431700000	4246600000	4584100000	4257900000	6099700000	308
tr|A0A1S3XAL0|A0A1S3XAL0_TOBAC;tr|A0A1S3YS78|A0A1S3YS78_TOBAC;tr|A0A1S4B8N8|A0A1S4B8N8_TOBAC	tr|A0A1S3XAL0|A0A1S3XAL0_TOBAC H/ACA ribonucleoprotein complex subunit OS=Nicotiana tabacum OX=4097 GN=LOC107762965 PE=3 SV=1;tr|A0A1S3YS78|A0A1S3YS78_TOBAC H/ACA ribonucleoprotein complex subunit OS=Nicotiana tabacum OX=4097 GN=LOC107778989 PE=3 SV=1;tr|A	1	1	1	7	7	7	38.429	28133000	143180000	25568000	21879000	81462000	139630000	78664000	46719000	77929000	141300000	91324000	35910000	0	0	0	0	0	0	0	0	0	0	0	0	8
tr|A0A1S3XAL8|A0A1S3XAL8_TOBAC	tr|A0A1S3XAL8|A0A1S3XAL8_TOBAC glycine-rich RNA-binding protein-like OS=Nicotiana tabacum OX=4097 GN=LOC107762936 PE=4 SV=1	5	2	2	26.4	14.2	14.2	30.827	1179700000	1820300000	1273400000	902540000	1965200000	1761900000	838760000	617900000	1380800000	1265600000	1619600000	777020000	140280000	235070000	368940000	279450000	390470000	249790000	290680000	214310000	241320000	302830000	218520000	233620000	87
tr|A0A1S3XAM8|A0A1S3XAM8_TOBAC;tr|A0A1S4BEZ5|A0A1S4BEZ5_TOBAC	tr|A0A1S3XAM8|A0A1S3XAM8_TOBAC uncharacterized protein LOC107762942 OS=Nicotiana tabacum OX=4097 GN=LOC107762942 PE=4 SV=1;tr|A0A1S4BEZ5|A0A1S4BEZ5_TOBAC uncharacterized protein LOC107807533 OS=Nicotiana tabacum OX=4097 GN=LOC107807533 PE=4 SV=1	1	1	1	0.8	0.8	0.8	2.3242	60359000	234040000	35404000	57140000	54285000	126380000	65137000	34969000	195840000	74491000	168970000	36260000	0	0	0	0	0	0	0	0	0	0	0	0	11
tr|A0A1S3XAN1|A0A1S3XAN1_TOBAC;tr|A0A1S4DEV9|A0A1S4DEV9_TOBAC;tr|A0A1S3Y218|A0A1S3Y218_TOBAC;tr|A0A1S3X3E1|A0A1S3X3E1_TOBAC	tr|A0A1S3XAN1|A0A1S3XAN1_TOBAC 40S ribosomal protein S14-2 OS=Nicotiana tabacum OX=4097 GN=LOC107763058 PE=3 SV=1;tr|A0A1S4DEV9|A0A1S4DEV9_TOBAC 40S ribosomal protein S14-2-like OS=Nicotiana tabacum OX=4097 GN=LOC107829070 PE=3 SV=1;tr|A0A1S3Y218|A0A1S3Y21	9	9	9	66	66	66	87.673	2552500000	5225100000	2425800000	1677100000	6660600000	6250700000	4080400000	2028600000	5213900000	3773600000	4609900000	2431600000	1101500000	1319800000	1310700000	1400500000	1675600000	1421900000	1585000000	1070900000	976260000	1172500000	1027500000	926600000	126
tr|Q9FSF6|Q9FSF6_TOBAC;tr|A0A1S4CT55|A0A1S4CT55_TOBAC;tr|A0A1S3ZDW5|A0A1S3ZDW5_TOBAC;tr|A0A1S3ZDJ6|A0A1S3ZDJ6_TOBAC;tr|A0A1S3XAW1|A0A1S3XAW1_TOBAC	tr|Q9FSF6|Q9FSF6_TOBAC 60S ribosomal protein L11-1-like (Fragment) OS=Nicotiana tabacum OX=4097 GN=rbl11-like PE=2 SV=1;tr|A0A1S4CT55|A0A1S4CT55_TOBAC 60S ribosomal protein L11-1-like OS=Nicotiana tabacum OX=4097 GN=LOC107822394 PE=3 SV=1;tr|A0A1S3ZDW5|A0A	6	6	6	39.2	39.2	39.2	62.912	1084600000	2764800000	801450000	620090000	2261000000	3813400000	2490000000	976800000	2303800000	2624700000	4060000000	747250000	191100000	436960000	391920000	265660000	382650000	561020000	674470000	636150000	371510000	369170000	478420000	317810000	121
tr|G8FQI8|G8FQI8_TOBAC;tr|Q71S26|Q71S26_TOBAC;tr|A0A1S3XB16|A0A1S3XB16_TOBAC;tr|A0A1S4DBZ6|A0A1S4DBZ6_TOBAC;tr|A0A1S3XB74|A0A1S3XB74_TOBAC;tr|W8RFY2|W8RFY2_TOBAC;tr|G8FQI7|G8FQI7_TOBAC	tr|G8FQI8|G8FQI8_TOBAC Spermidine synthase (Fragment) OS=Nicotiana tabacum OX=4097 PE=2 SV=1;tr|Q71S26|Q71S26_TOBAC Spermidine synthase OS=Nicotiana tabacum OX=4097 GN=spds PE=2 SV=1;tr|A0A1S3XB16|A0A1S3XB16_TOBAC spermidine synthase OS=Nicotiana tabacum O	3	3	3	19.1	19.1	19.1	10.335	250390000	456930000	161840000	146520000	156690000	233160000	119140000	43655000	216200000	227760000	390110000	101190000	99323000	0	92453000	89563000	60349000	59996000	63337000	0	56152000	72767000	79325000	66670000	13
tr|A0A1S3XB30|A0A1S3XB30_TOBAC;tr|A0A1S4B7H5|A0A1S4B7H5_TOBAC	tr|A0A1S3XB30|A0A1S3XB30_TOBAC Ribosomal protein L15 OS=Nicotiana tabacum OX=4097 GN=LOC107763095 PE=3 SV=1;tr|A0A1S4B7H5|A0A1S4B7H5_TOBAC Ribosomal protein L15 OS=Nicotiana tabacum OX=4097 GN=LOC107805262 PE=3 SV=1	8	1	1	42.6	7.4	7.4	3.4339	84779000	29719000	33461000	38885000	105460000	262580000	100950000	105020000	107470000	56328000	72207000	30052000	56583000	0	49722000	45770000	41968000	79401000	62681000	94144000	0	0	17775000	46499000	6
tr|F2VJ74|F2VJ74_TOBAC;tr|A0A1S4CEX5|A0A1S4CEX5_TOBAC;tr|A0A1S3XB52|A0A1S3XB52_TOBAC	tr|F2VJ74|F2VJ74_TOBAC Aspartic protease 1 OS=Nicotiana tabacum OX=4097 PE=2 SV=1;tr|A0A1S4CEX5|A0A1S4CEX5_TOBAC cyprosin-like OS=Nicotiana tabacum OX=4097 GN=LOC107818093 PE=3 SV=1;tr|A0A1S3XB52|A0A1S3XB52_TOBAC cyprosin-like OS=Nicotiana tabacum OX=4097	1	1	1	3.2	3.2	3.2	9.3316	49302000	48176000	23232000	24556000	45904000	79454000	27489000	0	55002000	48184000	68322000	23425000	0	0	0	0	0	0	0	0	0	0	0	0	8
tr|A0A1S4CEA3|A0A1S4CEA3_TOBAC;tr|A0A1S3XBA9|A0A1S3XBA9_TOBAC	tr|A0A1S4CEA3|A0A1S4CEA3_TOBAC 23 kDa subunit of oxygen evolving system of photosystem II OS=Nicotiana tabacum OX=4097 GN=LOC107817913 PE=3 SV=1;tr|A0A1S3XBA9|A0A1S3XBA9_TOBAC 23 kDa subunit of oxygen evolving system of photosystem II OS=Nicotiana tabacum	1	1	1	5.8	5.8	5.8	3.0545	30430000	40557000	13482000	23268000	0	120690000	50844000	46132000	138140000	124020000	98402000	27599000	0	0	0	0	0	0	0	0	0	0	0	0	2
tr|A0A1S3XBE5|A0A1S3XBE5_TOBAC	tr|A0A1S3XBE5|A0A1S3XBE5_TOBAC uncharacterized protein LOC107763293 OS=Nicotiana tabacum OX=4097 GN=LOC107763293 PE=4 SV=1	1	1	1	1.5	1.5	1.5	2.3077	78426000	257680000	58599000	57774000	869780000	1024600000	0	0	933420000	1240900000	14850000	322450000	0	0	0	0	0	0	0	0	0	0	0	0	4
tr|A0A1S3ZIE1|A0A1S3ZIE1_TOBAC;tr|A0A1S3XBE6|A0A1S3XBE6_TOBAC;tr|A0A1S4CXG7|A0A1S4CXG7_TOBAC;tr|A0A1S3YVD0|A0A1S3YVD0_TOBAC	tr|A0A1S3ZIE1|A0A1S3ZIE1_TOBAC Photosystem I reaction center subunit II, chloroplastic OS=Nicotiana tabacum OX=4097 GN=LOC107787208 PE=3 SV=1;tr|A0A1S3XBE6|A0A1S3XBE6_TOBAC Photosystem I reaction center subunit II, chloroplastic OS=Nicotiana tabacum OX=409	6	6	6	41.7	41.7	41.7	100.9	1211100000	1963100000	395580000	447450000	354710000	1592100000	522470000	478990000	1546100000	1711100000	2395800000	633790000	491120000	398760000	233900000	286490000	106700000	249400000	174420000	358920000	398630000	253500000	360090000	408040000	60
tr|A0A1S3XBF4|A0A1S3XBF4_TOBAC;tr|A0A1S3XBL8|A0A1S3XBL8_TOBAC	tr|A0A1S3XBF4|A0A1S3XBF4_TOBAC protein plastid transcriptionally active 16, chloroplastic-like isoform X2 OS=Nicotiana tabacum OX=4097 GN=LOC107763187 PE=4 SV=1;tr|A0A1S3XBL8|A0A1S3XBL8_TOBAC protein plastid transcriptionally active 16, chloroplastic-like	9	9	3	23.4	23.4	6.3	67.086	1119400000	1871900000	760230000	668010000	1240200000	1218900000	657930000	410080000	1422300000	1224900000	1523500000	573090000	400810000	391030000	397690000	367680000	309750000	293330000	278630000	286200000	259540000	305790000	240640000	264220000	65
tr|A0A1S3XBI0|A0A1S3XBI0_TOBAC	tr|A0A1S3XBI0|A0A1S3XBI0_TOBAC putative wall-associated receptor kinase-like 16 OS=Nicotiana tabacum OX=4097 GN=LOC107763297 PE=4 SV=1	1	1	1	14.9	14.9	14.9	4.1737	144640000	121270000	118140000	79338000	164240000	124000000	139180000	73212000	236890000	0	192800000	232680000	0	0	0	0	0	0	0	0	0	0	0	0	11
tr|A0A1S3XBQ8|A0A1S3XBQ8_TOBAC;tr|A0A1S4D806|A0A1S4D806_TOBAC	tr|A0A1S3XBQ8|A0A1S3XBQ8_TOBAC probable 28S rRNA (Cytosine-C(5))-methyltransferase OS=Nicotiana tabacum OX=4097 GN=LOC107763385 PE=3 SV=1;tr|A0A1S4D806|A0A1S4D806_TOBAC probable 28S rRNA (Cytosine(4447)-C(5))-methyltransferase OS=Nicotiana tabacum OX=4097	4	4	4	8	8	8	31.951	21426000	161280000	10206000	16895000	90092000	132710000	37713000	27004000	43175000	86801000	90491000	21964000	0	44598000	0	11259000	34655000	22518000	19199000	17023000	28480000	27634000	29257000	22588000	18
tr|A0A1S4C4X2|A0A1S4C4X2_TOBAC;tr|A0A1S3XBR3|A0A1S3XBR3_TOBAC	tr|A0A1S4C4X2|A0A1S4C4X2_TOBAC T-complex protein 1 subunit epsilon OS=Nicotiana tabacum OX=4097 GN=LOC107815179 PE=3 SV=1;tr|A0A1S3XBR3|A0A1S3XBR3_TOBAC T-complex protein 1 subunit epsilon OS=Nicotiana tabacum OX=4097 GN=LOC107763390 PE=3 SV=1	3	3	3	6.2	6.2	6.2	7.1975	76847000	147650000	21453000	20365000	224670000	227870000	121600000	11591000	194450000	268700000	276910000	73255000	50304000	56633000	0	0	83103000	74329000	76236000	0	84213000	0	91794000	73949000	11
tr|A0A1S3XBV6|A0A1S3XBV6_TOBAC;tr|Q941H9|Q941H9_TOBAC;tr|A0A1S3ZI52|A0A1S3ZI52_TOBAC	tr|A0A1S3XBV6|A0A1S3XBV6_TOBAC glycine-rich RNA-binding protein 2, mitochondrial-like OS=Nicotiana tabacum OX=4097 GN=LOC107763441 PE=4 SV=1;tr|Q941H9|Q941H9_TOBAC RNA-binding protein OS=Nicotiana tabacum OX=4097 PE=2 SV=1;tr|A0A1S3ZI52|A0A1S3ZI52_TOBAC gl	1	1	1	5.8	5.8	5.8	3.9748	0	145180000	37180000	18123000	50047000	66789000	33297000	27737000	75512000	96293000	124510000	37949000	0	0	0	0	0	0	0	0	0	0	0	0	3
tr|A0A1S4AEL0|A0A1S4AEL0_TOBAC;tr|A0A1S3XBV7|A0A1S3XBV7_TOBAC	tr|A0A1S4AEL0|A0A1S4AEL0_TOBAC 60S ribosomal protein L27 OS=Nicotiana tabacum OX=4097 GN=LOC107796761 PE=3 SV=1;tr|A0A1S3XBV7|A0A1S3XBV7_TOBAC 60S ribosomal protein L27 OS=Nicotiana tabacum OX=4097 GN=LOC107763424 PE=3 SV=1	4	4	2	28.1	28.1	14.1	29.372	954960000	4968400000	796200000	695700000	2146000000	2684000000	942490000	592480000	1673300000	1639600000	2765200000	368910000	680480000	1207800000	899700000	829880000	736940000	821510000	832110000	772560000	475290000	529310000	802560000	408380000	60
tr|A0A1S3XBY1|A0A1S3XBY1_TOBAC	tr|A0A1S3XBY1|A0A1S3XBY1_TOBAC RNA helicase OS=Nicotiana tabacum OX=4097 GN=LOC107763470 PE=4 SV=1	10	1	1	29.2	4.1	4.1	10.262	43495000	0	0	24489000	44643000	0	39071000	29782000	0	0	66223000	23303000	0	0	0	0	0	0	0	0	0	0	0	0	7
tr|A0A1S3XBY8|A0A1S3XBY8_TOBAC	tr|A0A1S3XBY8|A0A1S3XBY8_TOBAC alpha-glucosidase-like OS=Nicotiana tabacum OX=4097 GN=LOC107763450 PE=3 SV=1	3	1	1	6.2	3	3	6.3747	108280000	195240000	23098000	33121000	141700000	42492000	32710000	19351000	60858000	74157000	89035000	153010000	0	0	0	0	0	0	0	0	0	0	0	0	2
tr|A0A1S3XC54|A0A1S3XC54_TOBAC;tr|A0A1S3Y0V1|A0A1S3Y0V1_TOBAC	tr|A0A1S3XC54|A0A1S3XC54_TOBAC S-adenosylmethionine synthase OS=Nicotiana tabacum OX=4097 GN=LOC107763541 PE=3 SV=1;tr|A0A1S3Y0V1|A0A1S3Y0V1_TOBAC S-adenosylmethionine synthase OS=Nicotiana tabacum OX=4097 GN=LOC107770931 PE=3 SV=1	16	16	4	58.3	58.3	16.3	174.74	1993900000	7400300000	1410200000	981210000	3481800000	5061100000	2307900000	1150300000	3307700000	4300800000	5216900000	1830200000	548010000	925400000	689390000	467730000	640300000	758760000	675120000	563230000	680350000	760180000	719360000	816510000	148
tr|O23792|O23792_TOBAC;tr|A0A1S3XC61|A0A1S3XC61_TOBAC	tr|O23792|O23792_TOBAC CND41, chloroplast nucleoid DNA binding protein OS=Nicotiana tabacum OX=4097 GN=cnd41 PE=2 SV=1;tr|A0A1S3XC61|A0A1S3XC61_TOBAC aspartyl protease family protein At5g10770-like OS=Nicotiana tabacum OX=4097 GN=LOC107763440 PE=3 SV=1	2	2	2	4.2	4.2	4.2	33.12	10957000	117400000	12106000	9030000	51816000	67118000	29268000	0	60454000	78599000	131920000	20815000	0	37170000	0	0	19509000	19321000	16660000	0	24024000	28156000	33155000	18940000	16
tr|A0A1S3XC82|A0A1S3XC82_TOBAC;tr|Q9XEN8|Q9XEN8_TOBAC	tr|A0A1S3XC82|A0A1S3XC82_TOBAC Annexin OS=Nicotiana tabacum OX=4097 GN=LOC107763461 PE=3 SV=1;tr|Q9XEN8|Q9XEN8_TOBAC Annexin OS=Nicotiana tabacum OX=4097 GN=Anx3 PE=2 SV=1	4	4	4	15.2	15.2	15.2	10.732	30435000	93470000	20337000	19586000	14268000	96754000	19285000	35273000	195470000	93950000	122140000	31729000	0	0	0	19915000	0	22491000	0	29266000	40039000	20571000	25202000	0	6
tr|Q40569|Q40569_TOBAC;tr|A0A1S4CW84|A0A1S4CW84_TOBAC;tr|A0A1S4C4M7|A0A1S4C4M7_TOBAC;tr|A0A1S4C294|A0A1S4C294_TOBAC;tr|A0A1S4AZI1|A0A1S4AZI1_TOBAC;tr|A0A1S4ASQ4|A0A1S4ASQ4_TOBAC;tr|A0A1S3ZZM0|A0A1S3ZZM0_TOBAC;tr|A0A1S3YRU3|A0A1S3YRU3_TOBAC;tr|A0A1S3XC99|A0A1S3XC99_TOBAC;tr|A0A1S4BZY1|A0A1S4BZY1_TOBAC;tr|A0A1S3ZJA8|A0A1S3ZJA8_TOBAC;tr|A0A1S3YH65|A0A1S3YH65_TOBAC;tr|A0A1S4DHQ8|A0A1S4DHQ8_TOBAC;tr|A…	tr|Q40569|Q40569_TOBAC Ras-related GTP-binding protein OS=Nicotiana tabacum OX=4097 PE=2 SV=1;tr|A0A1S4CW84|A0A1S4CW84_TOBAC GTP-binding protein YPTM2 OS=Nicotiana tabacum OX=4097 GN=LOC107823280 PE=4 SV=1;tr|A0A1S4C4M7|A0A1S4C4M7_TOBAC GTP-binding protein	2	2	0	9.4	9.4	0	7.6805	0	97143000	20214000	0	0	0	0	45733000	6198500	0	0	0	0	0	0	0	0	0	0	0	0	0	0	0	7
tr|A0A1S4BTW3|A0A1S4BTW3_TOBAC;tr|A0A1S3XCA7|A0A1S3XCA7_TOBAC;tr|A0A1S4C147|A0A1S4C147_TOBAC;tr|A0A1S3X3N9|A0A1S3X3N9_TOBAC	tr|A0A1S4BTW3|A0A1S4BTW3_TOBAC mitochondrial uncoupling protein 5-like OS=Nicotiana tabacum OX=4097 GN=LOC107811785 PE=3 SV=1;tr|A0A1S3XCA7|A0A1S3XCA7_TOBAC mitochondrial uncoupling protein 5-like OS=Nicotiana tabacum OX=4097 GN=LOC107763594 PE=3 SV=1;tr|A	3	3	3	14.9	14.9	14.9	17.408	341180000	495970000	256500000	221480000	445050000	385950000	58994000	132840000	244510000	307490000	384030000	137230000	220560000	159860000	236030000	213230000	231270000	142640000	0	148810000	101690000	122400000	139860000	113400000	16
tr|A0A1S3XCC0|A0A1S3XCC0_TOBAC	tr|A0A1S3XCC0|A0A1S3XCC0_TOBAC uncharacterized protein LOC107763591 isoform X3 OS=Nicotiana tabacum OX=4097 GN=LOC107763591 PE=4 SV=1	1	1	1	6.6	6.6	6.6	-2	59022000	124730000	19953000	26353000	55484000	182270000	36226000	31807000	0	199400000	47418000	0	0	0	0	0	0	0	0	0	0	0	0	0	2
tr|A0A1S4AEF4|A0A1S4AEF4_TOBAC;tr|A0A1S3XCC7|A0A1S3XCC7_TOBAC;tr|A0A1S4BS40|A0A1S4BS40_TOBAC	tr|A0A1S4AEF4|A0A1S4AEF4_TOBAC probable LL-diaminopimelate aminotransferase, chloroplastic OS=Nicotiana tabacum OX=4097 GN=LOC107796759 PE=4 SV=1;tr|A0A1S3XCC7|A0A1S3XCC7_TOBAC LL-diaminopimelate aminotransferase, chloroplastic-like OS=Nicotiana tabacum OX	2	2	2	13	13	13	6.1918	109400000	128350000	67269000	62949000	128680000	208110000	94807000	90843000	229160000	163850000	270300000	89565000	0	45425000	0	0	55615000	0	55241000	0	0	58026000	93153000	0	5
tr|A0A1S3XCG1|A0A1S3XCG1_TOBAC;tr|A0A1S3XDG5|A0A1S3XDG5_TOBAC;tr|A0A1S4AME8|A0A1S4AME8_TOBAC	tr|A0A1S3XCG1|A0A1S3XCG1_TOBAC glutamyl-tRNA(Gln) amidotransferase subunit A, chloroplastic/mitochondrial-like OS=Nicotiana tabacum OX=4097 GN=LOC107763652 PE=3 SV=1;tr|A0A1S3XDG5|A0A1S3XDG5_TOBAC glutamyl-tRNA(Gln) amidotransferase subunit A, chloroplasti	1	1	1	13.9	13.9	13.9	2.7141	0	0	20402	0	10340000	11929000	4639400	0	5656400	4907200	9183100	19546	0	0	0	0	0	0	0	0	0	0	0	0	5
tr|A0A1S3Y927|A0A1S3Y927_TOBAC;tr|A0A1S3Y9D7|A0A1S3Y9D7_TOBAC;tr|A0A1S3XCK8|A0A1S3XCK8_TOBAC;tr|A0A1S4CBR9|A0A1S4CBR9_TOBAC;tr|A0A1S4CY76|A0A1S4CY76_TOBAC;tr|A0A1S4CBH8|A0A1S4CBH8_TOBAC	tr|A0A1S3Y927|A0A1S3Y927_TOBAC Malate dehydrogenase OS=Nicotiana tabacum OX=4097 GN=LOC107773752 PE=3 SV=1;tr|A0A1S3Y9D7|A0A1S3Y9D7_TOBAC Malate dehydrogenase OS=Nicotiana tabacum OX=4097 GN=LOC107773752 PE=3 SV=1;tr|A0A1S3XCK8|A0A1S3XCK8_TOBAC Malate dehy	5	1	1	20.1	5.5	5.5	7.369	0	0	35242000	0	0	0	0	0	155700000	50916000	84626000	33538000	0	0	0	0	0	0	0	0	0	0	0	0	2
tr|A0A1S3XCQ1|A0A1S3XCQ1_TOBAC;tr|Q9FSF2|Q9FSF2_TOBAC	tr|A0A1S3XCQ1|A0A1S3XCQ1_TOBAC dnaJ protein homolog OS=Nicotiana tabacum OX=4097 GN=LOC107763704 PE=3 SV=1;tr|Q9FSF2|Q9FSF2_TOBAC Putative DNAJ protein OS=Nicotiana tabacum OX=4097 GN=dnaJ PE=2 SV=1	11	1	1	35.4	6	6	13.068	0	0	162430000	162630000	170770000	221070000	121690000	122620000	145500000	192900000	201380000	180760000	0	0	0	0	0	0	0	0	0	0	0	0	6
tr|A0A1S3XES7|A0A1S3XES7_TOBAC;tr|A0A1S3XCQ9|A0A1S3XCQ9_TOBAC	tr|A0A1S3XES7|A0A1S3XES7_TOBAC 60S ribosomal protein L12-like OS=Nicotiana tabacum OX=4097 GN=LOC107764287 PE=3 SV=1;tr|A0A1S3XCQ9|A0A1S3XCQ9_TOBAC 60S ribosomal protein L12 OS=Nicotiana tabacum OX=4097 GN=LOC107763560 PE=3 SV=1	7	7	7	50.6	50.6	50.6	45.529	1178100000	2759900000	644580000	530800000	2369300000	3030900000	1249500000	670400000	1796800000	2449900000	2851000000	631070000	339040000	533780000	361220000	315040000	364950000	406710000	399380000	382650000	390060000	418640000	372400000	301460000	124
tr|A0A1S4CMN2|A0A1S4CMN2_TOBAC;tr|A0A1S3XCR2|A0A1S3XCR2_TOBAC	tr|A0A1S4CMN2|A0A1S4CMN2_TOBAC probable LRR receptor-like serine/threonine-protein kinase At1g14390 OS=Nicotiana tabacum OX=4097 GN=LOC107820712 PE=4 SV=1;tr|A0A1S3XCR2|A0A1S3XCR2_TOBAC probable LRR receptor-like serine/threonine-protein kinase At1g14390 O	1	1	1	1.7	1.7	1.7	4.2138	31961000	100390000	22287000	16642000	63406000	140410000	26666000	0	42428000	60522000	76197000	24455000	0	0	0	0	0	0	0	0	0	0	0	0	2
tr|A0A1S3XCV4|A0A1S3XCV4_TOBAC;tr|A0A1S3XLH3|A0A1S3XLH3_TOBAC	tr|A0A1S3XCV4|A0A1S3XCV4_TOBAC V-type proton ATPase subunit E-like OS=Nicotiana tabacum OX=4097 GN=LOC107763771 PE=3 SV=1;tr|A0A1S3XLH3|A0A1S3XLH3_TOBAC V-type proton ATPase subunit E-like OS=Nicotiana tabacum OX=4097 GN=LOC107766486 PE=3 SV=1	2	1	0	9.5	5.2	0	8.5461	161440000	153040000	55193000	71588000	90833000	123670000	56366000	48422000	204970000	124370000	114120000	47196000	0	0	0	0	0	0	0	0	0	0	0	0	9
tr|A0A1S3XCV6|A0A1S3XCV6_TOBAC	tr|A0A1S3XCV6|A0A1S3XCV6_TOBAC 5-methyltetrahydropteroyltriglutamate--homocysteine S-methyltransferase OS=Nicotiana tabacum OX=4097 GN=LOC107763602 PE=3 SV=1	17	2	0	30.1	4.2	0	5.8114	46401000	214150000	0	22252000	0	0	46863000	0	115950000	280560000	235580000	53018000	0	52504000	0	0	0	0	29986000	0	0	96501000	73396000	0	6
tr|A0A1S3XCW6|A0A1S3XCW6_TOBAC;tr|A0A1S3YEM1|A0A1S3YEM1_TOBAC	tr|A0A1S3XCW6|A0A1S3XCW6_TOBAC 60S ribosomal protein L21-1-like OS=Nicotiana tabacum OX=4097 GN=LOC107763612 PE=3 SV=1;tr|A0A1S3YEM1|A0A1S3YEM1_TOBAC 60S ribosomal protein L21-1-like isoform X1 OS=Nicotiana tabacum OX=4097 GN=LOC107775385 PE=3 SV=1	4	4	2	29.3	29.3	24.4	68.243	736200000	961310000	198920000	329950000	1024400000	1114300000	443710000	213790000	599810000	434300000	758970000	278580000	387400000	312710000	253600000	271770000	322530000	284720000	411420000	123030000	203450000	382550000	222780000	155120000	25
tr|A0A1S3XCY5|A0A1S3XCY5_TOBAC;tr|A0A3G1E3Q4|A0A3G1E3Q4_TOBAC;tr|A0A1S3Z8T0|A0A1S3Z8T0_TOBAC	tr|A0A1S3XCY5|A0A1S3XCY5_TOBAC beta-ketoacyl-[acyl-carrier-protein] synthase I OS=Nicotiana tabacum OX=4097 GN=LOC107763810 PE=3 SV=1;tr|A0A3G1E3Q4|A0A3G1E3Q4_TOBAC beta-ketoacyl-[acyl-carrier-protein] synthase I OS=Nicotiana tabacum OX=4097 PE=2 SV=1;tr|A	10	7	7	31.8	24.3	24.3	64.909	421600000	463620000	274650000	213430000	593820000	854520000	394510000	437340000	540910000	626880000	619250000	410180000	199150000	131760000	128860000	111050000	274770000	177730000	200680000	268620000	164990000	205640000	203130000	213590000	50
tr|A0A1S3XCY9|A0A1S3XCY9_TOBAC;tr|A0A1S4C7S3|A0A1S4C7S3_TOBAC	tr|A0A1S3XCY9|A0A1S3XCY9_TOBAC Protein transport protein Sec61 subunit beta OS=Nicotiana tabacum OX=4097 GN=LOC107763814 PE=3 SV=1;tr|A0A1S4C7S3|A0A1S4C7S3_TOBAC Protein transport protein Sec61 subunit beta OS=Nicotiana tabacum OX=4097 GN=LOC107816002 PE=3	1	1	1	13.3	13.3	13.3	14.82	0	19596000	1623900	0	0	64977000	0	431090	0	71541000	82917000	0	0	0	0	0	0	0	0	0	0	0	0	0	5
tr|A0A1S3XD08|A0A1S3XD08_TOBAC;tr|A0A1S4CDP5|A0A1S4CDP5_TOBAC	tr|A0A1S3XD08|A0A1S3XD08_TOBAC coatomer subunit beta-1-like OS=Nicotiana tabacum OX=4097 GN=LOC107763805 PE=4 SV=1;tr|A0A1S4CDP5|A0A1S4CDP5_TOBAC coatomer subunit beta-1-like OS=Nicotiana tabacum OX=4097 GN=LOC107817724 PE=4 SV=1	5	3	0	23.7	16.6	0	16.728	367000000	571480000	147430000	101210000	419410000	398530000	313350000	280920000	523820000	476010000	607520000	196040000	166140000	103990000	48760000	82677000	145270000	75116000	113200000	196230000	114330000	160500000	178560000	144900000	28
tr|A0A1S3XD09|A0A1S3XD09_TOBAC	tr|A0A1S3XD09|A0A1S3XD09_TOBAC 60S ribosomal protein L35 OS=Nicotiana tabacum OX=4097 GN=LOC107763659 PE=3 SV=1	2	1	1	17.1	6.5	6.5	2.2409	31435000	393550000	42034000	26293000	74841000	244740000	93758000	21478000	95636000	43937000	92473000	20917000	0	0	0	0	0	0	0	0	0	0	0	0	14
tr|A0A1S3YK85|A0A1S3YK85_TOBAC;tr|A0A1S4BE21|A0A1S4BE21_TOBAC;tr|A0A1S4AY21|A0A1S4AY21_TOBAC;tr|A0A1S3ZHL2|A0A1S3ZHL2_TOBAC;tr|A0A1S3YXJ2|A0A1S3YXJ2_TOBAC;tr|A0A1S3YXC9|A0A1S3YXC9_TOBAC;tr|A0A1S4AR47|A0A1S4AR47_TOBAC;tr|A0A1S3ZIB2|A0A1S3ZIB2_TOBAC;tr|A0A1S3ZMV2|A0A1S3ZMV2_TOBAC;tr|A0A1S4C6X1|A0A1S4C6X1_TOBAC;tr|A0A1S4C6T2|A0A1S4C6T2_TOBAC;tr|A0A1S4AIR9|A0A1S4AIR9_TOBAC;tr|A0A1S4C6I4|A0A1S4C6I4_TO…	tr|A0A1S3YK85|A0A1S3YK85_TOBAC protein kinase 2A, chloroplastic-like OS=Nicotiana tabacum OX=4097 GN=LOC107776927 PE=3 SV=1;tr|A0A1S4BE21|A0A1S4BE21_TOBAC protein kinase 2B, chloroplastic-like OS=Nicotiana tabacum OX=4097 GN=LOC107807229 PE=3 SV=1;tr|A0A1S	1	1	1	2.2	2.2	2.2	4.5498	0	0	0	0	0	0	0	0	0	0	0	0	0	0	0	0	0	0	0	0	0	0	0	0	1
tr|A0A1S3XD32|A0A1S3XD32_TOBAC;sp|P49026|GBLP_TOBAC	tr|A0A1S3XD32|A0A1S3XD32_TOBAC guanine nucleotide-binding protein subunit beta-like protein OS=Nicotiana tabacum OX=4097 GN=LOC107763849 PE=3 SV=1;sp|P49026|GBLP_TOBAC Guanine nucleotide-binding protein subunit beta-like protein OS=Nicotiana tabacum OX=409	14	1	1	51.2	5.2	5.2	20.721	95087000	176900000	62085000	72427000	246860000	231520000	152550000	93147000	197910000	468200000	347220000	129490000	102060000	0	106880000	106910000	146040000	0	132270000	141220000	111940000	157740000	120260000	152280000	13
tr|A0A1S3XDD8|A0A1S3XDD8_TOBAC;tr|A0A1S4CD37|A0A1S4CD37_TOBAC	tr|A0A1S3XDD8|A0A1S3XDD8_TOBAC staphylococcal nuclease domain-containing protein 1-like OS=Nicotiana tabacum OX=4097 GN=LOC107763958 PE=4 SV=1;tr|A0A1S4CD37|A0A1S4CD37_TOBAC staphylococcal nuclease domain-containing protein 1-like OS=Nicotiana tabacum OX=4	1	1	1	9.3	9.3	9.3	3.657	72174000	0	27160000	23166000	60422000	88524000	48011000	0	98380000	0	117540000	31630000	0	0	0	0	0	0	0	0	0	0	0	0	3
tr|A0A1S4CNP0|A0A1S4CNP0_TOBAC;tr|A0A1S3XDE1|A0A1S3XDE1_TOBAC;tr|A0A1S3ZAH0|A0A1S3ZAH0_TOBAC;tr|A0A1S3Z9X4|A0A1S3Z9X4_TOBAC	tr|A0A1S4CNP0|A0A1S4CNP0_TOBAC Aspartate aminotransferase OS=Nicotiana tabacum OX=4097 GN=LOC107820992 PE=3 SV=1;tr|A0A1S3XDE1|A0A1S3XDE1_TOBAC Aspartate aminotransferase OS=Nicotiana tabacum OX=4097 GN=LOC107763872 PE=3 SV=1;tr|A0A1S3ZAH0|A0A1S3ZAH0_TOBAC	2	1	1	5	3	3	4.1065	22767000	0	0	0	0	185300000	43191000	16962000	86945000	0	0	0	0	0	0	0	0	0	0	0	0	0	0	0	1
tr|A0A1S3XDG3|A0A1S3XDG3_TOBAC	tr|A0A1S3XDG3|A0A1S3XDG3_TOBAC 60S ribosomal protein L23a-like OS=Nicotiana tabacum OX=4097 GN=LOC107763824 PE=3 SV=1	6	2	2	29.9	9.7	9.7	68.892	810250000	1179300000	357630000	425380000	1348300000	2844700000	1876400000	751770000	1343500000	1754000000	1949000000	347390000	385250000	343160000	332780000	395580000	520960000	869550000	1068900000	838150000	502860000	545990000	528050000	319910000	24
tr|A0A1S4B8C1|A0A1S4B8C1_TOBAC;tr|A0A1S3XDJ8|A0A1S3XDJ8_TOBAC	tr|A0A1S4B8C1|A0A1S4B8C1_TOBAC uncharacterized protein LOC107805582 isoform X2 OS=Nicotiana tabacum OX=4097 GN=LOC107805582 PE=4 SV=1;tr|A0A1S3XDJ8|A0A1S3XDJ8_TOBAC uncharacterized protein LOC107764011 isoform X2 OS=Nicotiana tabacum OX=4097 GN=LOC10776401	1	1	1	2.9	2.9	2.9	-2	431000000	737100000	212910000	231930000	245770000	555250000	307820000	173130000	147510000	320200000	913840000	149380000	0	0	0	0	0	0	0	0	0	0	0	0	1
tr|A0A1S3XDN8|A0A1S3XDN8_TOBAC;tr|A0A1S3ZS87|A0A1S3ZS87_TOBAC	tr|A0A1S3XDN8|A0A1S3XDN8_TOBAC protein TIC 100 OS=Nicotiana tabacum OX=4097 GN=LOC107763893 PE=4 SV=1;tr|A0A1S3ZS87|A0A1S3ZS87_TOBAC protein TIC 100-like OS=Nicotiana tabacum OX=4097 GN=LOC107789905 PE=4 SV=1	1	1	1	1.7	1.7	1.7	2.3912	0	0	0	0	0	0	0	0	0	0	0	0	0	0	0	0	0	0	0	0	0	0	0	0	1
tr|A0A1S4B0A3|A0A1S4B0A3_TOBAC;tr|A0A1S3XUD3|A0A1S3XUD3_TOBAC;tr|A0A1S3XDP2|A0A1S3XDP2_TOBAC	tr|A0A1S4B0A3|A0A1S4B0A3_TOBAC pinin-like OS=Nicotiana tabacum OX=4097 GN=LOC107803145 PE=3 SV=1;tr|A0A1S3XUD3|A0A1S3XUD3_TOBAC pinin-like OS=Nicotiana tabacum OX=4097 GN=LOC107768853 PE=3 SV=1;tr|A0A1S3XDP2|A0A1S3XDP2_TOBAC pinin-like OS=Nicotiana tabacum	1	1	1	3.9	3.9	3.9	2.3606	0	35105000	0	0	0	30088000	8616400	0	14829000	42030000	29560000	0	0	0	0	0	0	0	0	0	0	0	0	0	1
tr|A0A1S3XDU6|A0A1S3XDU6_TOBAC	tr|A0A1S3XDU6|A0A1S3XDU6_TOBAC pentatricopeptide repeat-containing protein At5g46580, chloroplastic-like OS=Nicotiana tabacum OX=4097 GN=LOC107763956 PE=3 SV=1	1	1	1	2.4	2.4	2.4	5.0134	84642000	228550000	0	38550000	86852000	61660000	0	29841000	0	0	0	0	0	0	0	0	0	0	0	0	0	0	0	0	2
tr|A0A1S4AKB5|A0A1S4AKB5_TOBAC;tr|A0A1S4BDS0|A0A1S4BDS0_TOBAC;tr|A0A1S3XDX6|A0A1S3XDX6_TOBAC;tr|A0A1S3Y8K5|A0A1S3Y8K5_TOBAC;tr|A0A1S4D357|A0A1S4D357_TOBAC	tr|A0A1S4AKB5|A0A1S4AKB5_TOBAC Histone H4 OS=Nicotiana tabacum OX=4097 GN=LOC107798555 PE=3 SV=1;tr|A0A1S4BDS0|A0A1S4BDS0_TOBAC Histone H4 OS=Nicotiana tabacum OX=4097 GN=LOC107807147 PE=3 SV=1;tr|A0A1S3XDX6|A0A1S3XDX6_TOBAC Histone H4 OS=Nicotiana tabacum	8	8	2	59.2	59.2	12.6	92.021	9452900000	30185000000	9357700000	6743200000	22025000000	28242000000	20885000000	8299400000	23700000000	36846000000	43212000000	9933200000	4087800000	5464400000	4797200000	3713600000	5884100000	6363200000	8280000000	6750900000	5453900000	8753300000	7915200000	6058900000	128
tr|A0A1S4BEC6|A0A1S4BEC6_TOBAC;tr|A0A1S3YPS5|A0A1S3YPS5_TOBAC;tr|A0A1S4C6T4|A0A1S4C6T4_TOBAC;tr|A0A1S3Y1Z7|A0A1S3Y1Z7_TOBAC;tr|A0A1S4DP59|A0A1S4DP59_TOBAC;tr|A0A1S3Y3P7|A0A1S3Y3P7_TOBAC;tr|A0A1S4CBT7|A0A1S4CBT7_TOBAC;tr|A0A1S4D4Q1|A0A1S4D4Q1_TOBAC;tr|A0A1S3XDY2|A0A1S3XDY2_TOBAC;tr|A0A1S4AXD3|A0A1S4AXD3_TOBAC;tr|A0A1S3YFP6|A0A1S3YFP6_TOBAC;tr|A0A1S3ZTP9|A0A1S3ZTP9_TOBAC;tr|A0A1S3YPP7|A0A1S3YPP7_TO…	tr|A0A1S4BEC6|A0A1S4BEC6_TOBAC Histone H2B OS=Nicotiana tabacum OX=4097 GN=LOC107807323 PE=3 SV=1;tr|A0A1S3YPS5|A0A1S3YPS5_TOBAC Histone H2B OS=Nicotiana tabacum OX=4097 GN=LOC107778381 PE=3 SV=1;tr|A0A1S4C6T4|A0A1S4C6T4_TOBAC Histone H2B OS=Nicotiana taba	3	3	3	26.1	26.1	26.1	37.746	1903900000	12746000000	2568100000	2579400000	5785300000	8024000000	5051800000	2562700000	8981800000	9958800000	13325000000	3329300000	1246600000	4497100000	2916900000	3050900000	2893400000	4264800000	3887900000	4131400000	3693000000	3895700000	4763300000	3363400000	51
tr|A0A1S3XE16|A0A1S3XE16_TOBAC;tr|A0A1S3ZFB6|A0A1S3ZFB6_TOBAC	tr|A0A1S3XE16|A0A1S3XE16_TOBAC 60S ribosomal protein L5-like OS=Nicotiana tabacum OX=4097 GN=LOC107764090 PE=3 SV=1;tr|A0A1S3ZFB6|A0A1S3ZFB6_TOBAC 60S ribosomal protein L5-like OS=Nicotiana tabacum OX=4097 GN=LOC107786115 PE=3 SV=1	8	8	3	41.2	41.2	19.9	33.611	1082800000	2610700000	517150000	416850000	1301200000	1247900000	526190000	294380000	1024500000	1139400000	1687200000	288300000	226920000	652420000	486750000	378710000	472740000	423210000	298170000	313210000	279860000	331510000	459730000	296730000	69
tr|A0A1S3XE39|A0A1S3XE39_TOBAC;tr|A0A1S3XEB8|A0A1S3XEB8_TOBAC	tr|A0A1S3XE39|A0A1S3XE39_TOBAC uncharacterized protein LOC107764097 isoform X2 OS=Nicotiana tabacum OX=4097 GN=LOC107764097 PE=4 SV=1;tr|A0A1S3XEB8|A0A1S3XEB8_TOBAC uncharacterized protein LOC107764097 isoform X1 OS=Nicotiana tabacum OX=4097 GN=LOC10776409	1	1	1	4.1	4.1	4.1	4.0041	0	0	0	28862000	0	63118000	19838000	37696000	35911000	29819000	58828000	28394000	0	0	0	0	0	0	0	0	0	0	0	0	1
tr|A0A1S3XHX3|A0A1S3XHX3_TOBAC;tr|A0A1S3XE58|A0A1S3XE58_TOBAC	tr|A0A1S3XHX3|A0A1S3XHX3_TOBAC protein NUCLEAR FUSION DEFECTIVE 4-like OS=Nicotiana tabacum OX=4097 GN=LOC107765436 PE=3 SV=1;tr|A0A1S3XE58|A0A1S3XE58_TOBAC protein NUCLEAR FUSION DEFECTIVE 4-like OS=Nicotiana tabacum OX=4097 GN=LOC107764082 PE=3 SV=1	1	1	1	2.3	2.3	2.3	3.6589	0	0	1323800	0	22424000	32220000	13464000	107300	20920000	24821000	29616000	421320	0	0	0	0	0	0	0	0	0	0	0	0	6
tr|A0A1S3XE60|A0A1S3XE60_TOBAC	tr|A0A1S3XE60|A0A1S3XE60_TOBAC Aldehyde dehydrogenase OS=Nicotiana tabacum OX=4097 GN=LOC107764230 PE=3 SV=1	2	2	2	4.2	4.2	4.2	6.8826	249610000	190050000	162210000	164890000	246340000	168970000	166890000	158070000	178690000	192000000	165390000	186940000	0	0	0	0	0	0	0	0	0	0	0	0	14
tr|A0A1S3XEF3|A0A1S3XEF3_TOBAC	tr|A0A1S3XEF3|A0A1S3XEF3_TOBAC Alpha-1,4 glucan phosphorylase OS=Nicotiana tabacum OX=4097 GN=LOC107764127 PE=3 SV=1	24	1	1	40	2.4	2.4	8.8985	73633000	0	58821000	39545000	64031000	123730000	43180000	45216000	54248000	87922000	83518000	48205000	0	0	0	0	0	0	0	0	0	0	0	0	1
tr|A0A1S4DMR5|A0A1S4DMR5_TOBAC;tr|A0A1S3XEG4|A0A1S3XEG4_TOBAC	tr|A0A1S4DMR5|A0A1S4DMR5_TOBAC glycine-rich domain-containing protein 2-like OS=Nicotiana tabacum OX=4097 GN=LOC107831436 PE=4 SV=1;tr|A0A1S3XEG4|A0A1S3XEG4_TOBAC glycine-rich domain-containing protein 2-like OS=Nicotiana tabacum OX=4097 GN=LOC107764218 PE	1	1	1	1.2	1.2	1.2	2.9036	25588000	87467000	22762000	0	27493000	66436000	64108000	13542000	0	0	0	17028000	0	0	0	0	0	0	0	0	0	0	0	0	8
tr|A0A1S4DA62|A0A1S4DA62_TOBAC;tr|A0A1S4BZJ1|A0A1S4BZJ1_TOBAC;tr|A0A1S3XEH9|A0A1S3XEH9_TOBAC;tr|A0A1S4C9T3|A0A1S4C9T3_TOBAC;tr|A0A1S3YJD9|A0A1S3YJD9_TOBAC;tr|A0A1S3Y4M0|A0A1S3Y4M0_TOBAC	tr|A0A1S4DA62|A0A1S4DA62_TOBAC 40S ribosomal protein SA OS=Nicotiana tabacum OX=4097 GN=LOC107827661 PE=3 SV=1;tr|A0A1S4BZJ1|A0A1S4BZJ1_TOBAC 40S ribosomal protein SA OS=Nicotiana tabacum OX=4097 GN=LOC107813555 PE=3 SV=1;tr|A0A1S3XEH9|A0A1S3XEH9_TOBAC 40S	6	6	6	25	25	25	43.185	170160000	398070000	168390000	148590000	509230000	531840000	273660000	179870000	882960000	1234100000	1152000000	278350000	46351000	108110000	70965000	71274000	106320000	128590000	112530000	138140000	239230000	233690000	186380000	136850000	49
tr|A0A1S3XEN9|A0A1S3XEN9_TOBAC	tr|A0A1S3XEN9|A0A1S3XEN9_TOBAC probable acyl-CoA dehydrogenase IBR3 OS=Nicotiana tabacum OX=4097 GN=LOC107764289 PE=3 SV=1	3	1	1	6	2.9	2.9	6.0004	47822000	84842000	23438000	16629000	85378000	72083000	24060000	15117000	75586000	47704000	74560000	23158000	0	0	0	0	0	0	0	0	0	0	0	0	1
tr|A0A1S3XHL4|A0A1S3XHL4_TOBAC;tr|A0A1S3XEQ3|A0A1S3XEQ3_TOBAC	tr|A0A1S3XHL4|A0A1S3XHL4_TOBAC thylakoid lumenal 15 kDa protein 1, chloroplastic-like OS=Nicotiana tabacum OX=4097 GN=LOC107765234 PE=4 SV=1;tr|A0A1S3XEQ3|A0A1S3XEQ3_TOBAC thylakoid lumenal 15 kDa protein 1, chloroplastic-like OS=Nicotiana tabacum OX=4097	2	2	2	15.3	15.3	15.3	13.378	34894000	136180000	13384000	46701000	143180000	205540000	111140000	29743000	143780000	182100000	172590000	23886000	0	0	0	51634000	0	60485000	63525000	45521000	0	0	0	0	5
tr|A0A1S4CRY1|A0A1S4CRY1_TOBAC;tr|A0A1S3XEW0|A0A1S3XEW0_TOBAC	tr|A0A1S4CRY1|A0A1S4CRY1_TOBAC photosystem I subunit O-like OS=Nicotiana tabacum OX=4097 GN=LOC107821835 PE=4 SV=1;tr|A0A1S3XEW0|A0A1S3XEW0_TOBAC photosystem I subunit O-like OS=Nicotiana tabacum OX=4097 GN=LOC107764264 PE=4 SV=1	1	1	1	16.8	16.8	16.8	53.617	89237000	87939000	34083000	55447000	105650000	91367000	69231000	38738000	81681000	23824000	77556000	64202000	46975000	23115000	0	49550000	36718000	24742000	35998000	38560000	26965000	0	20675000	53421000	22
tr|A0A1S3XF03|A0A1S3XF03_TOBAC	tr|A0A1S3XF03|A0A1S3XF03_TOBAC beta-ketoacyl-[acyl-carrier-protein] synthase I OS=Nicotiana tabacum OX=4097 GN=LOC107764303 PE=3 SV=1	6	6	4	20.4	20.4	11.9	27.764	213830000	415880000	220380000	182560000	889750000	586650000	241570000	170540000	416000000	626540000	1021300000	252770000	121620000	87972000	168580000	227770000	202210000	123460000	138750000	159210000	99077000	125530000	151210000	167240000	25
tr|A0A1S3XF06|A0A1S3XF06_TOBAC	tr|A0A1S3XF06|A0A1S3XF06_TOBAC WW domain-containing protein C11B10.08-like OS=Nicotiana tabacum OX=4097 GN=LOC107764510 PE=4 SV=1	2	2	2	18.5	18.5	18.5	23.636	126880000	96663000	70846000	23846000	73547000	123800000	69400000	61929000	76408000	78690000	157690000	60248000	97354000	33365000	51295000	0	30207000	39279000	38996000	67419000	33434000	30387000	61323000	52604000	8
tr|A0A1S3XF24|A0A1S3XF24_TOBAC	tr|A0A1S3XF24|A0A1S3XF24_TOBAC (-)-isopiperitenol/(-)-carveol dehydrogenase, mitochondrial-like OS=Nicotiana tabacum OX=4097 GN=LOC107764430 PE=4 SV=1	2	2	2	10.7	10.7	10.7	4.6444	0	58532000	13952000	10376000	69523000	88038000	19698000	25655000	18681000	95014000	41379000	31547000	0	0	0	0	0	0	0	30180000	0	33624000	0	0	2
tr|A0A1S3XFF8|A0A1S3XFF8_TOBAC;tr|H9CCH7|H9CCH7_TOBAC;tr|A0A1S3ZI83|A0A1S3ZI83_TOBAC;tr|A0A1S3X5Z5|A0A1S3X5Z5_TOBAC	tr|A0A1S3XFF8|A0A1S3XFF8_TOBAC 3-oxoacyl-[acyl-carrier-protein] reductase OS=Nicotiana tabacum OX=4097 GN=LOC107764635 PE=3 SV=1;tr|H9CCH7|H9CCH7_TOBAC 3-oxoacyl-[acyl-carrier-protein] reductase OS=Nicotiana tabacum OX=4097 GN=KAR PE=2 SV=1;tr|A0A1S3ZI83|A	2	2	2	11.8	11.8	11.8	40.403	371270000	159240000	336230000	88486000	91595000	291850000	179820000	115280000	325070000	398090000	101930000	240050000	248040000	0	414710000	0	0	116580000	141120000	164140000	174420000	150510000	0	302620000	12
tr|A0A1S3XFM9|A0A1S3XFM9_TOBAC	tr|A0A1S3XFM9|A0A1S3XFM9_TOBAC AP complex subunit sigma OS=Nicotiana tabacum OX=4097 GN=LOC107764602 PE=3 SV=1	2	2	2	16.8	16.8	16.8	8.3086	51753000	88889000	32253000	32899000	111250000	97407000	43648000	22435000	88384000	89731000	69143000	39990000	0	0	0	0	54819000	61311000	50807000	0	45238000	42061000	33579000	0	11
tr|A0A1S3XFT6|A0A1S3XFT6_TOBAC	tr|A0A1S3XFT6|A0A1S3XFT6_TOBAC Glyceraldehyde-3-phosphate dehydrogenase OS=Nicotiana tabacum OX=4097 GN=LOC107764636 PE=3 SV=1	18	1	1	66.5	5.9	5.9	54.032	779430000	732160000	292900000	287650000	576740000	751220000	388420000	165180000	679610000	523670000	523890000	384280000	607650000	232110000	344630000	375430000	281980000	306630000	278810000	261980000	326050000	221860000	184520000	477700000	37
tr|A0A1S3XG12|A0A1S3XG12_TOBAC;tr|A0A1S4CBU4|A0A1S4CBU4_TOBAC;tr|A0A1S3XFW3|A0A1S3XFW3_TOBAC;tr|A0A1S4CBB0|A0A1S4CBB0_TOBAC	tr|A0A1S3XG12|A0A1S3XG12_TOBAC serine/arginine-rich splicing factor RS2Z33-like isoform X2 OS=Nicotiana tabacum OX=4097 GN=LOC107764629 PE=4 SV=1;tr|A0A1S4CBU4|A0A1S4CBU4_TOBAC serine/arginine-rich splicing factor RS2Z33-like isoform X2 OS=Nicotiana tabacu	1	1	1	4.4	4.4	4.4	3.783	6222200	0	0	0	0	40500000	12055000	0	39127000	0	0	0	0	0	0	0	0	0	0	0	0	0	0	0	3
tr|A0A1S3XG50|A0A1S3XG50_TOBAC;tr|A0A1S3XFZ9|A0A1S3XFZ9_TOBAC;tr|A0A1S3XFW8|A0A1S3XFW8_TOBAC;tr|A0A1S3ZYM0|A0A1S3ZYM0_TOBAC;tr|A0A1S3ZYW2|A0A1S3ZYW2_TOBAC;tr|A0A1S4CTW5|A0A1S4CTW5_TOBAC;tr|A0A1S3X820|A0A1S3X820_TOBAC;tr|A0A1S3YAF7|A0A1S3YAF7_TOBAC;tr|A0A1S3XFK6|A0A1S3XFK6_TOBAC	tr|A0A1S3XG50|A0A1S3XG50_TOBAC uncharacterized protein LOC107764684 isoform X3 OS=Nicotiana tabacum OX=4097 GN=LOC107764684 PE=4 SV=1;tr|A0A1S3XFZ9|A0A1S3XFZ9_TOBAC uncharacterized protein LOC107764684 isoform X2 OS=Nicotiana tabacum OX=4097 GN=LOC10776468	4	4	4	9	9	9	30.115	18592000	61923000	22206000	25375000	96328000	131750000	80018000	14265000	62979000	58955000	83907000	9645600	0	0	10990000	0	28277000	42563000	30975000	11143000	38740000	31656000	29366000	8376400	10
tr|A0A1S3XFX2|A0A1S3XFX2_TOBAC;tr|A0A1S4D9Y2|A0A1S4D9Y2_TOBAC	tr|A0A1S3XFX2|A0A1S3XFX2_TOBAC sulfate adenylyltransferase OS=Nicotiana tabacum OX=4097 GN=LOC107764687 PE=4 SV=1;tr|A0A1S4D9Y2|A0A1S4D9Y2_TOBAC ATP sulfurylase 1, chloroplastic-like OS=Nicotiana tabacum OX=4097 GN=LOC107827575 PE=4 SV=1	4	4	1	14.8	14.8	3.7	34.769	680310000	508130000	326080000	330240000	458170000	704460000	493020000	381510000	565890000	440210000	681750000	491190000	302200000	121130000	240800000	252170000	121800000	165570000	212820000	285840000	143440000	155630000	145200000	318800000	35
tr|A0A1S3XFX6|A0A1S3XFX6_TOBAC;tr|A0A1S3XX87|A0A1S3XX87_TOBAC	tr|A0A1S3XFX6|A0A1S3XFX6_TOBAC insulin-degrading enzyme-like 1, peroxisomal OS=Nicotiana tabacum OX=4097 GN=LOC107764696 PE=4 SV=1;tr|A0A1S3XX87|A0A1S3XX87_TOBAC insulin-degrading enzyme-like 1, peroxisomal OS=Nicotiana tabacum OX=4097 GN=LOC107769755 PE=4	1	1	1	3.7	3.7	3.7	3.6293	0	24195000	10866000	0	0	20721000	28850000	8254800	35421000	21841000	0	0	0	0	0	0	0	0	0	0	0	0	0	0	1
tr|A0A1S3XFZ4|A0A1S3XFZ4_TOBAC;tr|A0A1S4AXH9|A0A1S4AXH9_TOBAC;tr|A0A1S4AXH8|A0A1S4AXH8_TOBAC;tr|A0A1S4BLB5|A0A1S4BLB5_TOBAC	tr|A0A1S3XFZ4|A0A1S3XFZ4_TOBAC Dihydrolipoamide acetyltransferase component of pyruvate dehydrogenase complex OS=Nicotiana tabacum OX=4097 GN=LOC107764742 PE=3 SV=1;tr|A0A1S4AXH9|A0A1S4AXH9_TOBAC Dihydrolipoamide acetyltransferase component of pyruvate deh	3	3	2	9.9	9.9	7.7	9.901	92609000	182990000	47225000	41431000	86276000	115970000	72106000	41058000	168870000	118420000	166150000	54161000	49199000	48039000	42671000	39700000	35000000	32741000	40899000	41720000	53297000	35956000	43500000	44391000	11
tr|A0A1S4CX68|A0A1S4CX68_TOBAC;tr|A0A1S4BB85|A0A1S4BB85_TOBAC;tr|A0A1S3XG11|A0A1S3XG11_TOBAC;tr|A0A1S4CJK5|A0A1S4CJK5_TOBAC	tr|A0A1S4CX68|A0A1S4CX68_TOBAC uncharacterized protein LOC107823566 OS=Nicotiana tabacum OX=4097 GN=LOC107823566 PE=4 SV=1;tr|A0A1S4BB85|A0A1S4BB85_TOBAC uncharacterized protein LOC107806504 OS=Nicotiana tabacum OX=4097 GN=LOC107806504 PE=4 SV=1;tr|A0A1S3X	1	1	1	4.4	4.4	4.4	-2	32031000	202990000	23677000	28967000	79909000	100080000	91700000	52975000	61202000	144140000	156290000	28796000	0	0	0	0	0	0	0	0	0	0	0	0	1
tr|A0A1S4AXF5|A0A1S4AXF5_TOBAC;tr|A0A1S3XG87|A0A1S3XG87_TOBAC;tr|A0A1S4AXF8|A0A1S4AXF8_TOBAC;tr|A0A1S3XDR9|A0A1S3XDR9_TOBAC;tr|A0A1S4AIR3|A0A1S4AIR3_TOBAC;tr|A0A1S3XDR5|A0A1S3XDR5_TOBAC;tr|A0A1S4AXF6|A0A1S4AXF6_TOBAC;tr|A0A1S4AXS9|A0A1S4AXS9_TOBAC	tr|A0A1S4AXF5|A0A1S4AXF5_TOBAC zinc finger CCCH domain-containing protein ZFN-like isoform X4 OS=Nicotiana tabacum OX=4097 GN=LOC107802347 PE=4 SV=1;tr|A0A1S3XG87|A0A1S3XG87_TOBAC zinc finger CCCH domain-containing protein ZFN-like OS=Nicotiana tabacum OX=	3	3	3	7.6	7.6	7.6	7.884	147390000	267350000	91522000	63636000	283610000	375270000	253420000	72275000	283840000	378710000	279680000	202100000	0	0	0	0	0	252690000	217090000	172570000	0	0	0	185130000	14
tr|A0A1S3XGH0|A0A1S3XGH0_TOBAC;tr|A0A1S4C9M4|A0A1S4C9M4_TOBAC	tr|A0A1S3XGH0|A0A1S3XGH0_TOBAC uncharacterized protein LOC107764953 OS=Nicotiana tabacum OX=4097 GN=LOC107764953 PE=4 SV=1;tr|A0A1S4C9M4|A0A1S4C9M4_TOBAC uncharacterized protein LOC107816568 OS=Nicotiana tabacum OX=4097 GN=LOC107816568 PE=4 SV=1	2	2	2	13.4	13.4	13.4	5.8923	30326000	33242000	27400000	29593000	20620000	39743000	32698000	22996000	48820000	39533000	80133000	25398000	0	0	0	0	0	0	0	0	0	0	0	0	12
tr|A0A1S4D6G4|A0A1S4D6G4_TOBAC;tr|A0A1S3XGJ0|A0A1S3XGJ0_TOBAC	tr|A0A1S4D6G4|A0A1S4D6G4_TOBAC 40S ribosomal protein S30 OS=Nicotiana tabacum OX=4097 GN=LOC107826518 PE=3 SV=1;tr|A0A1S3XGJ0|A0A1S3XGJ0_TOBAC 40S ribosomal protein S30 OS=Nicotiana tabacum OX=4097 GN=LOC107764876 PE=3 SV=1	1	1	1	16.1	16.1	16.1	3.5539	260340000	582880000	231670000	265310000	240120000	476550000	204450000	102850000	311260000	306290000	354680000	166640000	0	0	0	0	0	0	0	0	0	0	0	0	12
tr|A0A1S3XGK4|A0A1S3XGK4_TOBAC	tr|A0A1S3XGK4|A0A1S3XGK4_TOBAC heat shock cognate protein 80-like OS=Nicotiana tabacum OX=4097 GN=LOC107764955 PE=3 SV=1	26	1	1	38.1	3.9	3.9	5.6233	6376700	6471500	3607500	7039800	0	8127700	6329000	11303000	8495200	7959100	13531000	7531500	0	0	0	0	0	0	0	0	0	0	0	0	4
tr|A0A1S4DQJ3|A0A1S4DQJ3_TOBAC;tr|A0A1S3XGL5|A0A1S3XGL5_TOBAC;tr|A0A1S3XHC2|A0A1S3XHC2_TOBAC;tr|A0A1S4DCI6|A0A1S4DCI6_TOBAC;tr|Q006P9|Q006P9_TOBAC;tr|A0A1S3Y729|A0A1S3Y729_TOBAC;tr|A0A1S4B4D7|A0A1S4B4D7_TOBAC	tr|A0A1S4DQJ3|A0A1S4DQJ3_TOBAC Malic enzyme OS=Nicotiana tabacum OX=4097 GN=LOC107832374 PE=3 SV=1;tr|A0A1S3XGL5|A0A1S3XGL5_TOBAC Malic enzyme OS=Nicotiana tabacum OX=4097 GN=LOC107765028 PE=3 SV=1;tr|A0A1S3XHC2|A0A1S3XHC2_TOBAC Malic enzyme OS=Nicotiana t	3	1	1	10.2	3.9	3.9	23.851	98484000	104260000	36544000	37066000	89210000	150400000	81293000	76017000	115190000	134950000	146020000	68335000	0	0	0	0	0	0	0	0	0	0	0	0	10
tr|A0A1S3XGN9|A0A1S3XGN9_TOBAC;tr|A0A1S3XH84|A0A1S3XH84_TOBAC;tr|A0A1S3YJW8|A0A1S3YJW8_TOBAC;tr|A0A1S3YK60|A0A1S3YK60_TOBAC;tr|A0A1S3YJC1|A0A1S3YJC1_TOBAC	tr|A0A1S3XGN9|A0A1S3XGN9_TOBAC nardilysin-like isoform X2 OS=Nicotiana tabacum OX=4097 GN=LOC107765001 PE=4 SV=1;tr|A0A1S3XH84|A0A1S3XH84_TOBAC nardilysin-like isoform X1 OS=Nicotiana tabacum OX=4097 GN=LOC107765001 PE=3 SV=1;tr|A0A1S3YJW8|A0A1S3YJW8_TOBAC	3	3	3	4.6	4.6	4.6	68.029	63235000	127460000	101670000	51005000	90409000	410240000	219200000	90524000	244020000	108790000	604570000	68936000	67401000	78409000	89073000	102100000	61337000	68737000	88125000	168160000	59184000	44060000	56180000	100140000	17
tr|A0A1S3XGQ6|A0A1S3XGQ6_TOBAC;tr|A0A1S4BYA8|A0A1S4BYA8_TOBAC	tr|A0A1S3XGQ6|A0A1S3XGQ6_TOBAC 1,4-alpha-glucan-branching enzyme 1, chloroplastic/amyloplastic-like OS=Nicotiana tabacum OX=4097 GN=LOC107764808 PE=4 SV=1;tr|A0A1S4BYA8|A0A1S4BYA8_TOBAC 1,4-alpha-glucan-branching enzyme 1, chloroplastic/amyloplastic-like O	2	2	1	11.1	11.1	6.7	3.7989	92217000	166990000	58917000	40938000	102630000	178740000	107760000	57345000	0	115120000	69801000	50685000	0	0	0	0	0	0	0	0	0	0	0	0	3
tr|A0A1S3XGR0|A0A1S3XGR0_TOBAC	tr|A0A1S3XGR0|A0A1S3XGR0_TOBAC ATP-dependent DNA helicase OS=Nicotiana tabacum OX=4097 GN=LOC107764965 PE=3 SV=1	1	1	1	9.5	9.5	9.5	-2	0	0	0	55364000	0	114850000	74613000	0	0	134130000	290390000	56487000	0	0	0	0	0	0	0	0	0	0	0	0	0
tr|L7QNZ1|L7QNZ1_TOBAC;tr|A0A1S4DA81|A0A1S4DA81_TOBAC;tr|A0A1S3XGV7|A0A1S3XGV7_TOBAC	tr|L7QNZ1|L7QNZ1_TOBAC Arginine/serine-rich 45 protein OS=Nicotiana tabacum OX=4097 GN=SR45 PE=2 SV=1;tr|A0A1S4DA81|A0A1S4DA81_TOBAC serine/arginine-rich splicing factor SR45-like OS=Nicotiana tabacum OX=4097 GN=LOC107827654 PE=4 SV=1;tr|A0A1S3XGV7|A0A1S3X	4	4	4	13.3	13.3	13.3	26.874	91360000	192050000	155310000	85111000	112470000	283270000	171500000	162760000	319910000	415010000	363430000	175720000	0	0	154590000	110630000	69389000	134610000	116340000	208460000	186260000	220390000	184580000	205050000	16
tr|A0A1S3XH54|A0A1S3XH54_TOBAC	tr|A0A1S3XH54|A0A1S3XH54_TOBAC protein RETICULATA-RELATED 4, chloroplastic-like OS=Nicotiana tabacum OX=4097 GN=LOC107765191 PE=3 SV=1	10	10	2	34.3	34.3	5	108.07	2394100000	3884500000	1886600000	1337800000	2494000000	2545500000	1773400000	911870000	1869500000	1872800000	2622100000	1185200000	709490000	600750000	926010000	747110000	738960000	513130000	711050000	719780000	470940000	418920000	518850000	776250000	97
tr|A0A1S4C6S2|A0A1S4C6S2_TOBAC;tr|A0A1S3XHC5|A0A1S3XHC5_TOBAC;tr|A0A1S3X5G6|A0A1S3X5G6_TOBAC;tr|A0A1S3XR20|A0A1S3XR20_TOBAC	tr|A0A1S4C6S2|A0A1S4C6S2_TOBAC 26S protease regulatory subunit S10B homolog B-like OS=Nicotiana tabacum OX=4097 GN=LOC107815805 PE=3 SV=1;tr|A0A1S3XHC5|A0A1S3XHC5_TOBAC 26S protease regulatory subunit S10B homolog B-like OS=Nicotiana tabacum OX=4097 GN=LOC	6	1	1	21.9	3	3	2.2594	36999000	0	10455000	11251000	0	34763000	16524000	5759400	0	27930000	31335000	8025100	0	0	0	0	0	0	0	0	0	0	0	0	1
tr|A0A1S3XHF5|A0A1S3XHF5_TOBAC;tr|A0A1S4DHK3|A0A1S4DHK3_TOBAC	tr|A0A1S3XHF5|A0A1S3XHF5_TOBAC S-adenosylmethionine synthase OS=Nicotiana tabacum OX=4097 GN=LOC107765217 PE=3 SV=1;tr|A0A1S4DHK3|A0A1S4DHK3_TOBAC S-adenosylmethionine synthase OS=Nicotiana tabacum OX=4097 GN=LOC107829890 PE=3 SV=1	12	1	0	43.3	3.8	0	3.1557	85790000	112670000	35973000	0	74653000	101760000	60579000	23175000	71961000	126160000	91873000	66648000	0	0	0	0	0	0	0	0	0	0	0	0	0
tr|A0A1S4BJB2|A0A1S4BJB2_TOBAC;tr|A0A1S3XHH4|A0A1S3XHH4_TOBAC;tr|A0A1S4BJD2|A0A1S4BJD2_TOBAC;tr|A0A1S3XHN5|A0A1S3XHN5_TOBAC	tr|A0A1S4BJB2|A0A1S4BJB2_TOBAC 54S ribosomal protein L51, mitochondrial-like isoform X2 OS=Nicotiana tabacum OX=4097 GN=LOC107808930 PE=3 SV=1;tr|A0A1S3XHH4|A0A1S3XHH4_TOBAC 54S ribosomal protein L51, mitochondrial-like isoform X2 OS=Nicotiana tabacum OX=4	1	1	1	11.9	11.9	11.9	4.465	96952000	210030000	118800000	120390000	276040000	0	0	0	104990000	253590000	325620000	49421000	0	0	0	0	0	0	0	0	0	0	0	0	4
tr|A0A1S3XHL0|A0A1S3XHL0_TOBAC	tr|A0A1S3XHL0|A0A1S3XHL0_TOBAC 40S ribosomal protein S20-2 OS=Nicotiana tabacum OX=4097 GN=LOC107765328 PE=3 SV=1	6	6	1	44.3	44.3	12.3	32.15	1252600000	2847800000	913330000	754540000	2006700000	2636400000	922010000	670810000	2154400000	2758500000	3671500000	1169100000	577050000	1846900000	984380000	484290000	1625100000	1352800000	1439900000	662390000	1222900000	1665100000	1841200000	696480000	72
tr|A0A1S4BXM7|A0A1S4BXM7_TOBAC;tr|A0A1S3XHM3|A0A1S3XHM3_TOBAC	tr|A0A1S4BXM7|A0A1S4BXM7_TOBAC ABC transporter I family member 10, chloroplastic-like OS=Nicotiana tabacum OX=4097 GN=LOC107812976 PE=4 SV=1;tr|A0A1S3XHM3|A0A1S3XHM3_TOBAC ABC transporter I family member 10, chloroplastic-like OS=Nicotiana tabacum OX=4097	1	1	1	8	8	8	21.236	61317000	79513000	58582000	36495000	94603000	84157000	77782000	32706000	63249000	0	43813000	31844000	31915000	23609000	56505000	0	37069000	23389000	46464000	0	22285000	0	0	26445000	12
tr|A0A1S3XHV6|A0A1S3XHV6_TOBAC;tr|A0A1S4AML2|A0A1S4AML2_TOBAC;tr|A0A1S3XHR2|A0A1S3XHR2_TOBAC;tr|A0A1S4D506|A0A1S4D506_TOBAC	tr|A0A1S3XHV6|A0A1S3XHV6_TOBAC 2-oxoisovalerate dehydrogenase subunit beta 2, mitochondrial-like isoform X2 OS=Nicotiana tabacum OX=4097 GN=LOC107765383 PE=4 SV=1;tr|A0A1S4AML2|A0A1S4AML2_TOBAC 2-oxoisovalerate dehydrogenase subunit beta 1, mitochondrial-l	2	2	2	11.8	11.8	11.8	12.178	31170000	99455000	29855000	54147000	188620000	133960000	187480000	72430000	179330000	194010000	113460000	133140000	0	0	0	0	0	0	145850000	0	0	69986000	0	159440000	19
tr|A0A1S4ALW2|A0A1S4ALW2_TOBAC;tr|A0A1S3YHU8|A0A1S3YHU8_TOBAC;tr|A0A1S3XHU6|A0A1S3XHU6_TOBAC	tr|A0A1S4ALW2|A0A1S4ALW2_TOBAC UPF0051 protein ABCI8, chloroplastic-like OS=Nicotiana tabacum OX=4097 GN=LOC107799048 PE=3 SV=1;tr|A0A1S3YHU8|A0A1S3YHU8_TOBAC UPF0051 protein ABCI8, chloroplastic-like OS=Nicotiana tabacum OX=4097 GN=LOC107776429 PE=3 SV=1;	1	1	1	2.4	2.4	2.4	3.2585	25554000	39952000	15206000	12049000	34553000	38857000	31189000	0	57150000	43817000	51039000	0	0	0	0	0	0	0	0	0	0	0	0	0	1
tr|A0A1S4BXQ0|A0A1S4BXQ0_TOBAC;tr|A0A1S3XHV4|A0A1S3XHV4_TOBAC	tr|A0A1S4BXQ0|A0A1S4BXQ0_TOBAC Expansin OS=Nicotiana tabacum OX=4097 GN=LOC107812998 PE=3 SV=1;tr|A0A1S3XHV4|A0A1S3XHV4_TOBAC Expansin OS=Nicotiana tabacum OX=4097 GN=LOC107765424 PE=3 SV=1	1	1	1	6.9	6.9	6.9	4.0392	38323000	0	32394000	36597000	32880000	37141000	31461000	29441000	0	38694000	43324000	33541000	0	0	0	0	0	0	0	0	0	0	0	0	2
tr|A0A1S3XHX0|A0A1S3XHX0_TOBAC	tr|A0A1S3XHX0|A0A1S3XHX0_TOBAC sm-like protein LSM7 OS=Nicotiana tabacum OX=4097 GN=LOC107765381 PE=3 SV=1	1	1	1	14.1	14.1	14.1	41.536	0	51612000	35067000	37897000	38515000	77966000	36147000	39718000	57136000	64819000	60071000	58574000	0	0	0	0	0	0	0	0	0	0	0	0	3
tr|A0A1S4BDY5|A0A1S4BDY5_TOBAC;tr|A0A1S3XI60|A0A1S3XI60_TOBAC	tr|A0A1S4BDY5|A0A1S4BDY5_TOBAC T-complex protein 1 subunit delta OS=Nicotiana tabacum OX=4097 GN=LOC107807204 PE=3 SV=1;tr|A0A1S3XI60|A0A1S3XI60_TOBAC T-complex protein 1 subunit delta OS=Nicotiana tabacum OX=4097 GN=LOC107765406 PE=3 SV=1	1	1	1	5.4	5.4	5.4	13.939	55724000	48806000	40438000	25100000	25546000	58462000	36385000	54240000	108090000	26233000	78501000	53463000	0	0	0	0	0	0	0	0	0	0	0	0	11
tr|A0A1S3XI79|A0A1S3XI79_TOBAC	tr|A0A1S3XI79|A0A1S3XI79_TOBAC 60S ribosomal protein L5-like OS=Nicotiana tabacum OX=4097 GN=LOC107765428 PE=3 SV=1	6	4	2	28.6	22.6	12	82.731	538880000	730470000	266770000	290790000	617950000	695890000	505230000	332320000	649860000	1008400000	937080000	258190000	343450000	225490000	306180000	397380000	266580000	261180000	312900000	417030000	249850000	237080000	322280000	237800000	36
tr|A0A1S3XIC5|A0A1S3XIC5_TOBAC	tr|A0A1S3XIC5|A0A1S3XIC5_TOBAC uncharacterized protein LOC107765568 OS=Nicotiana tabacum OX=4097 GN=LOC107765568 PE=4 SV=1	1	1	1	5.9	5.9	5.9	-2	299730000	508240000	289810000	312750000	318920000	66341000	180060000	0	0	218170000	489620000	205050000	0	0	0	0	0	0	0	0	0	0	0	0	4
tr|A0A1S4DGC3|A0A1S4DGC3_TOBAC;tr|A0A1S3XIH5|A0A1S3XIH5_TOBAC	tr|A0A1S4DGC3|A0A1S4DGC3_TOBAC maltose excess protein 1-like, chloroplastic OS=Nicotiana tabacum OX=4097 GN=LOC107829598 PE=4 SV=1;tr|A0A1S3XIH5|A0A1S3XIH5_TOBAC maltose excess protein 1-like, chloroplastic OS=Nicotiana tabacum OX=4097 GN=LOC107765567 PE=4	1	1	1	7.4	7.4	7.4	4.2635	30121000	40790000	24184000	16862000	20406000	51543000	23030000	27573000	45571000	31658000	34364000	25127000	0	0	0	0	0	0	0	0	0	0	0	0	12
tr|Q76KA9|Q76KA9_TOBAC;tr|A0A1S3XIR7|A0A1S3XIR7_TOBAC	tr|Q76KA9|Q76KA9_TOBAC Nitrite reductase OS=Nicotiana tabacum OX=4097 GN=nii4 PE=1 SV=1;tr|A0A1S3XIR7|A0A1S3XIR7_TOBAC ferredoxin--nitrite reductase, chloroplastic-like OS=Nicotiana tabacum OX=4097 GN=LOC107765655 PE=3 SV=1	1	1	1	1.9	1.9	1.9	8.2936	7006100	58683000	7470300	0	30993000	47968000	15207000	3994400	50791000	42516000	43514000	9365800	0	0	0	0	0	0	0	0	0	0	0	0	9
tr|Q5R216|Q5R216_TOBAC;tr|A0A1S3Y2G1|A0A1S3Y2G1_TOBAC;tr|A0A1S3XJA5|A0A1S3XJA5_TOBAC	tr|Q5R216|Q5R216_TOBAC Myosin XI OS=Nicotiana tabacum OX=4097 GN=Ntmy170 PE=2 SV=1;tr|A0A1S3Y2G1|A0A1S3Y2G1_TOBAC myosin-17-like OS=Nicotiana tabacum OX=4097 GN=LOC107771471 PE=3 SV=1;tr|A0A1S3XJA5|A0A1S3XJA5_TOBAC myosin-17-like OS=Nicotiana tabacum OX=40	6	6	5	4.3	4.3	3.4	15.75	70975000	236800000	50556000	40309000	164990000	290930000	79283000	38102000	143560000	199100000	259690000	77366000	23067000	42959000	40617000	34916000	33534000	41603000	33506000	29954000	35155000	49781000	41086000	45990000	12
tr|E5L8B6|E5L8B6_TOBAC;tr|A0A1S3XJE6|A0A1S3XJE6_TOBAC	tr|E5L8B6|E5L8B6_TOBAC Plastid thioredoxin F OS=Nicotiana tabacum OX=4097 GN=LOC107803208 PE=2 SV=1;tr|A0A1S3XJE6|A0A1S3XJE6_TOBAC thioredoxin F-type, chloroplastic-like OS=Nicotiana tabacum OX=4097 GN=LOC107765647 PE=4 SV=1	2	2	2	12	12	12	4.0699	15661000	50074000	14470000	15308000	101690000	111300000	43666000	37086000	246190000	185070000	149510000	0	0	0	0	0	51094000	0	0	0	78431000	69148000	55797000	0	4
tr|A0A1S3XJF2|A0A1S3XJF2_TOBAC;tr|A0A076KXA6|A0A076KXA6_TOBAC;tr|A0A1S4B7M2|A0A1S4B7M2_TOBAC	tr|A0A1S3XJF2|A0A1S3XJF2_TOBAC glycerate dehydrogenase OS=Nicotiana tabacum OX=4097 GN=LOC107765918 PE=3 SV=1;tr|A0A076KXA6|A0A076KXA6_TOBAC Glycerate dehydrogenase HPR, peroxisomal OS=Nicotiana tabacum OX=4097 PE=2 SV=1;tr|A0A1S4B7M2|A0A1S4B7M2_TOBAC glyc	8	8	8	32.9	32.9	32.9	58.074	332210000	443490000	153740000	163060000	406760000	861410000	451500000	529050000	1313300000	1407200000	1088700000	365130000	100660000	69100000	98109000	99562000	101450000	162960000	101870000	548040000	280780000	261830000	219290000	231250000	32
tr|A0A1S3XJK0|A0A1S3XJK0_TOBAC;tr|A0A1S4BH12|A0A1S4BH12_TOBAC	tr|A0A1S3XJK0|A0A1S3XJK0_TOBAC 40S ribosomal protein S27 OS=Nicotiana tabacum OX=4097 GN=LOC107765692 PE=3 SV=1;tr|A0A1S4BH12|A0A1S4BH12_TOBAC 40S ribosomal protein S27 OS=Nicotiana tabacum OX=4097 GN=LOC107808179 PE=3 SV=1	3	1	1	44.2	19.8	19.8	3.4449	107110000	0	63389000	65813000	228450000	0	0	0	171740000	0	163530000	59473000	0	0	0	0	0	0	0	0	0	0	0	0	5
tr|E2F3S9|E2F3S9_TOBAC;tr|E2F3T0|E2F3T0_TOBAC;tr|A0A1S3XJM8|A0A1S3XJM8_TOBAC	tr|E2F3S9|E2F3S9_TOBAC G-strand specific single-stranded telomere-binding protein 2 OS=Nicotiana tabacum OX=4097 GN=GTBP2 PE=2 SV=1;tr|E2F3T0|E2F3T0_TOBAC G-strand specific single-stranded telomere-binding protein 3 OS=Nicotiana tabacum OX=4097 GN=GTBP3 PE	6	3	3	23.7	15.4	15.4	20.434	141380000	239590000	99319000	112040000	386790000	340390000	160540000	68528000	84116000	246690000	200440000	136660000	0	51605000	13524000	0	135820000	57057000	147800000	0	60493000	79414000	74870000	106640000	11
tr|A0A1S4B7M6|A0A1S4B7M6_TOBAC;tr|A0A1S4ADK0|A0A1S4ADK0_TOBAC;tr|A0A1S3XJN1|A0A1S3XJN1_TOBAC;tr|A0A1S3ZH59|A0A1S3ZH59_TOBAC	tr|A0A1S4B7M6|A0A1S4B7M6_TOBAC T-complex protein 1 subunit zeta 1 OS=Nicotiana tabacum OX=4097 GN=LOC107805339 PE=3 SV=1;tr|A0A1S4ADK0|A0A1S4ADK0_TOBAC T-complex protein 1 subunit zeta 1-like OS=Nicotiana tabacum OX=4097 GN=LOC107796484 PE=3 SV=1;tr|A0A1S3	3	3	3	8	8	8	26.502	34945000	164790000	60521000	41784000	17380000	157760000	47079000	41046000	71545000	119700000	219870000	46490000	0	37628000	49531000	41513000	0	30956000	34359000	31435000	45678000	28718000	42029000	47126000	13
tr|A0A1S3Z901|A0A1S3Z901_TOBAC;tr|A0A1S3XK44|A0A1S3XK44_TOBAC	tr|A0A1S3Z901|A0A1S3Z901_TOBAC uncharacterized protein At4g15545-like OS=Nicotiana tabacum OX=4097 GN=LOC107784131 PE=4 SV=1;tr|A0A1S3XK44|A0A1S3XK44_TOBAC uncharacterized protein At4g15545-like OS=Nicotiana tabacum OX=4097 GN=LOC107766011 PE=4 SV=1	1	1	1	4.3	4.3	4.3	12.326	76632000	70530000	26115000	28956000	0	95342000	29549000	44972000	75652000	116290000	79544000	32906000	0	0	0	0	0	0	0	0	0	0	0	0	3
tr|A0A1S3XKB8|A0A1S3XKB8_TOBAC;tr|A0A1S3XK48|A0A1S3XK48_TOBAC;tr|A0A1S3YKF8|A0A1S3YKF8_TOBAC;tr|A0A1S3YJL9|A0A1S3YJL9_TOBAC;tr|A0A1S3ZF21|A0A1S3ZF21_TOBAC;tr|A0A1S3ZF10|A0A1S3ZF10_TOBAC	tr|A0A1S3XKB8|A0A1S3XKB8_TOBAC protein TIC110, chloroplastic-like isoform X2 OS=Nicotiana tabacum OX=4097 GN=LOC107766127 PE=4 SV=1;tr|A0A1S3XK48|A0A1S3XK48_TOBAC protein TIC110, chloroplastic-like isoform X1 OS=Nicotiana tabacum OX=4097 GN=LOC107766127 PE	3	3	3	3.4	3.4	3.4	9.0064	33092000	129180000	15302000	12621000	0	103830000	9679800	5398100	156980000	95034000	132990000	14629000	0	0	0	0	0	0	0	0	44959000	34141000	34965000	0	3
tr|A0A1S3ZLM0|A0A1S3ZLM0_TOBAC;tr|A0A1S3XK67|A0A1S3XK67_TOBAC	tr|A0A1S3ZLM0|A0A1S3ZLM0_TOBAC coatomer subunit beta-1-like OS=Nicotiana tabacum OX=4097 GN=LOC107788062 PE=4 SV=1;tr|A0A1S3XK67|A0A1S3XK67_TOBAC coatomer subunit beta-1 OS=Nicotiana tabacum OX=4097 GN=LOC107766102 PE=4 SV=1	19	4	4	40.6	11.7	11.7	93.378	101790000	137940000	13334000	15512000	488980000	291720000	146660000	71276000	363260000	219510000	332510000	84112000	57255000	0	0	0	144140000	0	62221000	55052000	97727000	67859000	72118000	56648000	10
tr|A0A1S4A0B3|A0A1S4A0B3_TOBAC;tr|A0A1S3YPN0|A0A1S3YPN0_TOBAC;tr|A0A1S3XKC1|A0A1S3XKC1_TOBAC;tr|A0A1S3Z3H7|A0A1S3Z3H7_TOBAC	tr|A0A1S4A0B3|A0A1S4A0B3_TOBAC cytochrome b-c1 complex subunit 8-like OS=Nicotiana tabacum OX=4097 GN=LOC107792330 PE=3 SV=1;tr|A0A1S3YPN0|A0A1S3YPN0_TOBAC cytochrome b-c1 complex subunit 8-like OS=Nicotiana tabacum OX=4097 GN=LOC107778283 PE=3 SV=1;tr|A0A	1	1	1	16.7	16.7	16.7	6.1774	77777000	302710000	0	77861000	153140000	0	0	33630000	0	105360000	0	0	0	0	0	0	0	0	0	0	0	0	0	0	9
tr|A0A1S4DAA2|A0A1S4DAA2_TOBAC;tr|A0A1S3XKF1|A0A1S3XKF1_TOBAC	tr|A0A1S4DAA2|A0A1S4DAA2_TOBAC 3-isopropylmalate dehydratase small subunit 3-like OS=Nicotiana tabacum OX=4097 GN=LOC107827507 PE=4 SV=1;tr|A0A1S3XKF1|A0A1S3XKF1_TOBAC 3-isopropylmalate dehydratase small subunit 3-like OS=Nicotiana tabacum OX=4097 GN=LOC10	1	1	1	5	5	5	4.0766	0	0	29280000	0	0	0	31337000	16381000	52089000	98700000	57458000	0	0	0	0	0	0	0	0	0	0	0	0	0	2
tr|Q9SMB6|Q9SMB6_TOBAC;tr|A0A1S3XKI0|A0A1S3XKI0_TOBAC;tr|A0A1S4DE12|A0A1S4DE12_TOBAC;tr|A0A1S3ZAZ7|A0A1S3ZAZ7_TOBAC	tr|Q9SMB6|Q9SMB6_TOBAC Phragmoplastin OS=Nicotiana tabacum OX=4097 GN=phragmoplastin PE=2 SV=1;tr|A0A1S3XKI0|A0A1S3XKI0_TOBAC dynamin-related protein 5A OS=Nicotiana tabacum OX=4097 GN=LOC107766191 PE=3 SV=1;tr|A0A1S4DE12|A0A1S4DE12_TOBAC dynamin-related p	4	4	4	9.7	9.7	9.7	17.291	194100000	348000000	75348000	92770000	189360000	293910000	125770000	92702000	264130000	204350000	278610000	81107000	59248000	81518000	41555000	58019000	46822000	45944000	46022000	62614000	52973000	62782000	41378000	43642000	18
tr|A0A1S3XKM0|A0A1S3XKM0_TOBAC;tr|A0A1S4AWH0|A0A1S4AWH0_TOBAC	tr|A0A1S3XKM0|A0A1S3XKM0_TOBAC Glutamine synthetase OS=Nicotiana tabacum OX=4097 GN=LOC107766022 PE=3 SV=1;tr|A0A1S4AWH0|A0A1S4AWH0_TOBAC Glutamine synthetase OS=Nicotiana tabacum OX=4097 GN=LOC107802035 PE=3 SV=1	11	11	10	41.4	41.4	35.2	177.21	1613700000	2396900000	993530000	937370000	1548100000	2887600000	992170000	1409500000	4629000000	2922900000	4143200000	1240600000	395260000	353550000	383350000	366890000	259600000	367930000	274170000	577000000	706050000	445120000	479520000	444280000	99
tr|A0A1S3XKN4|A0A1S3XKN4_TOBAC;tr|A0A1S3Z9Z2|A0A1S3Z9Z2_TOBAC	tr|A0A1S3XKN4|A0A1S3XKN4_TOBAC LOW QUALITY PROTEIN: histone H1-like OS=Nicotiana tabacum OX=4097 GN=LOC107766305 PE=3 SV=1;tr|A0A1S3Z9Z2|A0A1S3Z9Z2_TOBAC histone H1-like OS=Nicotiana tabacum OX=4097 GN=LOC107784565 PE=3 SV=1	3	3	3	13.5	13.5	13.5	6.7013	165880000	372590000	40934000	280300000	438520000	758490000	177820000	839350000	481450000	1405400000	684030000	187000000	313580000	0	142660000	315660000	469260000	448380000	0	598810000	495910000	293710000	0	483830000	12
tr|Q67BD0|Q67BD0_TOBAC;tr|A0A1S3XTB8|A0A1S3XTB8_TOBAC;tr|A0A1S3XKS8|A0A1S3XKS8_TOBAC;tr|Q84QJ3|Q84QJ3_TOBAC	tr|Q67BD0|Q67BD0_TOBAC Heat shock protein 70-3 OS=Nicotiana tabacum OX=4097 GN=HSP70-3 PE=3 SV=1;tr|A0A1S3XTB8|A0A1S3XTB8_TOBAC heat shock cognate 70 kDa protein 2-like OS=Nicotiana tabacum OX=4097 GN=LOC107768506 PE=3 SV=1;tr|A0A1S3XKS8|A0A1S3XKS8_TOBAC h	32	8	3	61.1	10.3	4	185.92	4646500000	7219000000	3402700000	2747300000	7325700000	7484700000	5115400000	1853100000	7396000000	8841100000	10005000000	4784300000	1464300000	1468400000	1920000000	2024000000	1439300000	1261800000	1399500000	1458200000	1267800000	1230800000	1505800000	2412800000	125
tr|A0A1S3XKZ4|A0A1S3XKZ4_TOBAC;tr|Q6IVK3|Q6IVK3_TOBAC;tr|A0A1S3ZB67|A0A1S3ZB67_TOBAC	tr|A0A1S3XKZ4|A0A1S3XKZ4_TOBAC UDP-glucuronate decarboxylase OS=Nicotiana tabacum OX=4097 GN=LOC107766396 PE=3 SV=1;tr|Q6IVK3|Q6IVK3_TOBAC UDP-glucuronate decarboxylase OS=Nicotiana tabacum OX=4097 PE=2 SV=1;tr|A0A1S3ZB67|A0A1S3ZB67_TOBAC UDP-glucuronate d	5	1	1	15.2	3.8	3.8	5.0111	61551000	150630000	55288000	44571000	0	0	0	0	29749000	0	111120000	0	0	0	0	0	0	0	0	0	0	0	0	0	3
tr|A0A1S4BWT0|A0A1S4BWT0_TOBAC;tr|A0A1S3ZPR4|A0A1S3ZPR4_TOBAC;tr|A0A1S3Y3F9|A0A1S3Y3F9_TOBAC;tr|A0A1S3ZEP2|A0A1S3ZEP2_TOBAC;tr|A0A1S4CQK3|A0A1S4CQK3_TOBAC;tr|A0A1S4A786|A0A1S4A786_TOBAC;tr|A0A1S4CQS1|A0A1S4CQS1_TOBAC;tr|A0A1S4A7E4|A0A1S4A7E4_TOBAC;tr|A0A1S3ZQI8|A0A1S3ZQI8_TOBAC;tr|A0A1S3ZF86|A0A1S3ZF86_TOBAC;tr|A0A1S3Y3F6|A0A1S3Y3F6_TOBAC;tr|A0A1S4B1W8|A0A1S4B1W8_TOBAC;tr|A0A1S3XLJ9|A0A1S3XLJ9_TO…	tr|A0A1S4BWT0|A0A1S4BWT0_TOBAC pumilio homolog 3-like OS=Nicotiana tabacum OX=4097 GN=LOC107812715 PE=4 SV=1;tr|A0A1S3ZPR4|A0A1S3ZPR4_TOBAC pumilio homolog 1-like isoform X2 OS=Nicotiana tabacum OX=4097 GN=LOC107789259 PE=4 SV=1;tr|A0A1S3Y3F9|A0A1S3Y3F9_TO	1	1	1	7.1	7.1	7.1	3.6254	28722000	53388000	14262000	13679000	22293000	34027000	0	5602900	26765000	28760000	30224000	0	0	0	0	0	0	0	0	0	0	0	0	0	6
tr|A0A1S3XLN6|A0A1S3XLN6_TOBAC	tr|A0A1S3XLN6|A0A1S3XLN6_TOBAC Coatomer subunit beta OS=Nicotiana tabacum OX=4097 GN=LOC107766461 PE=3 SV=1	15	3	3	20	4.9	4.9	21.458	58409000	127910000	2506800	1965300	137890000	39422000	54204000	53829000	14695000	132370000	33717000	41792000	16883000	80548000	0	0	59393000	46555000	37870000	53003000	0	50592000	46601000	24616000	6
tr|A0A1S3Z2U3|A0A1S3Z2U3_TOBAC;tr|A0A1S3XLS6|A0A1S3XLS6_TOBAC	tr|A0A1S3Z2U3|A0A1S3Z2U3_TOBAC Peptidyl-prolyl cis-trans isomerase OS=Nicotiana tabacum OX=4097 GN=LOC107782152 PE=4 SV=1;tr|A0A1S3XLS6|A0A1S3XLS6_TOBAC Peptidyl-prolyl cis-trans isomerase OS=Nicotiana tabacum OX=4097 GN=LOC107766359 PE=4 SV=1	1	1	1	16.1	16.1	16.1	12.54	100370000	43973000	16584000	17232000	39896000	44793000	58184000	15334000	49519000	47107000	47228000	13253000	0	0	0	0	0	0	0	0	0	0	0	0	2
tr|A0A1S4A1N0|A0A1S4A1N0_TOBAC;tr|A0A1S3XLX4|A0A1S3XLX4_TOBAC	tr|A0A1S4A1N0|A0A1S4A1N0_TOBAC fruit protein pKIWI502-like OS=Nicotiana tabacum OX=4097 GN=LOC107792815 PE=4 SV=1;tr|A0A1S3XLX4|A0A1S3XLX4_TOBAC fruit protein pKIWI502-like OS=Nicotiana tabacum OX=4097 GN=LOC107766402 PE=4 SV=1	6	6	6	22.5	22.5	22.5	22.992	426460000	852700000	232030000	170960000	439210000	322560000	299410000	91371000	233390000	316270000	347490000	84992000	180010000	99133000	125490000	104640000	99951000	66211000	87598000	93100000	88923000	86087000	91680000	98631000	29
tr|Q93YF1|Q93YF1_TOBAC;tr|A0A1S4BEG4|A0A1S4BEG4_TOBAC;tr|A0A1S3XLX8|A0A1S3XLX8_TOBAC	tr|Q93YF1|Q93YF1_TOBAC Nucleic acid binding protein OS=Nicotiana tabacum OX=4097 GN=nbp1 PE=2 SV=1;tr|A0A1S4BEG4|A0A1S4BEG4_TOBAC polyadenylate-binding protein RBP47-like OS=Nicotiana tabacum OX=4097 GN=LOC107807386 PE=4 SV=1;tr|A0A1S3XLX8|A0A1S3XLX8_TOBAC	1	1	1	6.6	6.6	6.6	11.94	66196000	40935000	78701000	45330000	40376000	25384000	22587000	20001000	58009000	22813000	34024000	31987000	0	0	0	0	0	0	0	0	0	0	0	0	11
tr|A0A1S3YH61|A0A1S3YH61_TOBAC;tr|A0A1S3XLY3|A0A1S3XLY3_TOBAC	tr|A0A1S3YH61|A0A1S3YH61_TOBAC LOW QUALITY PROTEIN: aldehyde dehydrogenase 22A1-like OS=Nicotiana tabacum OX=4097 GN=LOC107775989 PE=3 SV=1;tr|A0A1S3XLY3|A0A1S3XLY3_TOBAC aldehyde dehydrogenase 22A1-like OS=Nicotiana tabacum OX=4097 GN=LOC107766679 PE=3 SV	1	1	1	5.9	5.9	5.9	3.3149	17525000	12612000	8938900	8231100	7784300	0	6861300	6044300	0	0	0	9289500	0	0	0	0	0	0	0	0	0	0	0	0	1
tr|B7SNX1|B7SNX1_TOBAC;tr|A0A1S4CLH0|A0A1S4CLH0_TOBAC;tr|A0A1S3XM16|A0A1S3XM16_TOBAC	tr|B7SNX1|B7SNX1_TOBAC DNA-directed RNA polymerase subunit (Fragment) OS=Nicotiana tabacum OX=4097 GN=rpb1 PE=2 SV=1;tr|A0A1S4CLH0|A0A1S4CLH0_TOBAC DNA-directed RNA polymerase subunit OS=Nicotiana tabacum OX=4097 GN=LOC107820355 PE=3 SV=1;tr|A0A1S3XM16|A0A	1	1	1	1.3	1.3	1.3	4.1022	49363000	0	39944000	46403000	0	48205000	0	43724000	0	45851000	0	0	0	0	0	0	0	0	0	0	0	0	0	0	1
tr|A0A1S3XMA7|A0A1S3XMA7_TOBAC	tr|A0A1S3XMA7|A0A1S3XMA7_TOBAC 60S acidic ribosomal protein P2-2-like OS=Nicotiana tabacum OX=4097 GN=LOC107766732 PE=3 SV=1	2	2	2	10.8	10.8	10.8	25.629	1380600000	5491600000	1481600000	1291200000	2404100000	4285700000	1678900000	561520000	1729200000	2710700000	2687600000	474300000	780830000	1224800000	1247800000	1179400000	997770000	1574800000	1136800000	585800000	722440000	1068500000	802720000	698860000	33
tr|A0A1S3XMC0|A0A1S3XMC0_TOBAC;tr|A0A1S4CJT6|A0A1S4CJT6_TOBAC;tr|A0A1S4CKF5|A0A1S4CKF5_TOBAC	tr|A0A1S3XMC0|A0A1S3XMC0_TOBAC pantothenate kinase 2 OS=Nicotiana tabacum OX=4097 GN=LOC107766785 PE=4 SV=1;tr|A0A1S4CJT6|A0A1S4CJT6_TOBAC Pantothenate kinase 2 OS=Nicotiana tabacum OX=4097 GN=LOC107819853 PE=3 SV=1;tr|A0A1S4CKF5|A0A1S4CKF5_TOBAC Pantothen	3	3	3	7.3	7.3	7.3	14.536	146640000	97660000	29058000	52562000	42837000	157490000	95450000	70082000	160350000	79340000	155100000	84434000	67946000	35160000	45499000	47335000	0	43597000	42999000	75380000	44708000	24439000	30558000	58877000	8
tr|A0A1S4C8D4|A0A1S4C8D4_TOBAC;tr|A0A1S3XN55|A0A1S3XN55_TOBAC;tr|A0A1S4B7W2|A0A1S4B7W2_TOBAC;tr|A0A1S3Z6P8|A0A1S3Z6P8_TOBAC;tr|A0A1S3XMC3|A0A1S3XMC3_TOBAC;tr|A0A1S3XMN5|A0A1S3XMN5_TOBAC	tr|A0A1S4C8D4|A0A1S4C8D4_TOBAC protein EXPORTIN 1A-like OS=Nicotiana tabacum OX=4097 GN=LOC107816191 PE=3 SV=1;tr|A0A1S3XN55|A0A1S3XN55_TOBAC protein EXPORTIN 1A isoform X3 OS=Nicotiana tabacum OX=4097 GN=LOC107766762 PE=3 SV=1;tr|A0A1S4B7W2|A0A1S4B7W2_TOB	1	1	1	1.9	1.9	1.9	4.2709	39000000	28095000	16065000	19380000	21765000	51256000	15885000	17187000	25840000	0	46604000	10729000	0	0	0	0	0	0	0	0	0	0	0	0	4
tr|A0A1S4A4E8|A0A1S4A4E8_TOBAC;tr|A0A1S3XN61|A0A1S3XN61_TOBAC;tr|A0A1S4A4B2|A0A1S4A4B2_TOBAC;tr|A0A1S3XMC7|A0A1S3XMC7_TOBAC	tr|A0A1S4A4E8|A0A1S4A4E8_TOBAC uncharacterized protein LOC107793581 isoform X2 OS=Nicotiana tabacum OX=4097 GN=LOC107793581 PE=4 SV=1;tr|A0A1S3XN61|A0A1S3XN61_TOBAC uncharacterized protein LOC107766766 isoform X2 OS=Nicotiana tabacum OX=4097 GN=LOC10776676	2	2	2	4	4	4	6.7812	0	49625000	61660000	34079000	84183000	14967000	55379000	0	215530000	65144000	0	50193000	0	0	0	0	0	0	0	0	0	0	0	0	2
tr|A0A1S3XMD5|A0A1S3XMD5_TOBAC;tr|A0A1S4A473|A0A1S4A473_TOBAC;tr|A0A1S3YRG8|A0A1S3YRG8_TOBAC;tr|A0A1S4AA32|A0A1S4AA32_TOBAC	tr|A0A1S3XMD5|A0A1S3XMD5_TOBAC ATP citrate synthase OS=Nicotiana tabacum OX=4097 GN=LOC107766682 PE=4 SV=1;tr|A0A1S4A473|A0A1S4A473_TOBAC ATP citrate synthase OS=Nicotiana tabacum OX=4097 GN=LOC107793546 PE=4 SV=1;tr|A0A1S3YRG8|A0A1S3YRG8_TOBAC ATP citrate	13	13	13	32.5	32.5	32.5	134.49	726180000	1664300000	401170000	370520000	925960000	1311600000	758440000	395990000	1392800000	1496000000	1524100000	512100000	152400000	147870000	146540000	118430000	114310000	110110000	125370000	117020000	143710000	126410000	118280000	144400000	76
tr|A0A1S4B871|A0A1S4B871_TOBAC;tr|A0A1S3XMD8|A0A1S3XMD8_TOBAC;tr|A0A1S3YNZ5|A0A1S3YNZ5_TOBAC;tr|A0A1S4CY98|A0A1S4CY98_TOBAC;tr|A0A1S4CYR1|A0A1S4CYR1_TOBAC	tr|A0A1S4B871|A0A1S4B871_TOBAC ADP-ribosylation factor OS=Nicotiana tabacum OX=4097 GN=LOC107805428 PE=3 SV=1;tr|A0A1S3XMD8|A0A1S3XMD8_TOBAC ADP-ribosylation factor OS=Nicotiana tabacum OX=4097 GN=LOC107766761 PE=3 SV=1;tr|A0A1S3YNZ5|A0A1S3YNZ5_TOBAC ADP-r	4	4	4	34.7	34.7	34.7	15.754	320800000	296760000	125820000	188650000	395700000	300300000	126860000	109940000	199680000	211860000	211670000	277160000	124410000	72432000	108550000	94186000	99324000	54396000	69122000	69288000	52078000	46311000	51971000	144430000	14
tr|A0A1S4BTD8|A0A1S4BTD8_TOBAC;tr|A0A1S3XMD9|A0A1S3XMD9_TOBAC	tr|A0A1S4BTD8|A0A1S4BTD8_TOBAC pyruvate decarboxylase OS=Nicotiana tabacum OX=4097 GN=LOC107811683 PE=3 SV=1;tr|A0A1S3XMD9|A0A1S3XMD9_TOBAC pyruvate decarboxylase OS=Nicotiana tabacum OX=4097 GN=LOC107766552 PE=3 SV=1	3	3	3	9.6	9.6	9.6	23.233	254280000	309720000	119940000	122140000	128900000	193410000	108700000	85951000	249490000	277350000	272980000	111990000	163670000	152030000	140100000	0	93445000	105310000	0	117670000	138980000	109180000	131100000	127220000	13
tr|A0A1S3XMM0|A0A1S3XMM0_TOBAC;tr|A0A1S3Y286|A0A1S3Y286_TOBAC	tr|A0A1S3XMM0|A0A1S3XMM0_TOBAC ATP-dependent Clp protease proteolytic subunit OS=Nicotiana tabacum OX=4097 GN=LOC107766615 PE=3 SV=1;tr|A0A1S3Y286|A0A1S3Y286_TOBAC ATP-dependent Clp protease proteolytic subunit OS=Nicotiana tabacum OX=4097 GN=LOC107771248	6	6	6	19.5	19.5	19.5	52.502	696230000	1079400000	406310000	410530000	971330000	663420000	414540000	188310000	512980000	757290000	699070000	281500000	221880000	232630000	238160000	243940000	215490000	166580000	142870000	110290000	129280000	200660000	148070000	158970000	40
tr|A0A1S3XMU2|A0A1S3XMU2_TOBAC	tr|A0A1S3XMU2|A0A1S3XMU2_TOBAC probable carboxylesterase 15 OS=Nicotiana tabacum OX=4097 GN=LOC107766876 PE=3 SV=1	4	2	2	13.3	7.9	7.9	13.423	134910000	186880000	97686000	117280000	525010000	635150000	514430000	112210000	308790000	322340000	530130000	167430000	83050000	77969000	79283000	116390000	283370000	155030000	451690000	157030000	115990000	125280000	163540000	182800000	23
tr|A0A1S3XMU6|A0A1S3XMU6_TOBAC;tr|A0A1S3Z724|A0A1S3Z724_TOBAC;tr|A0A1S4DB68|A0A1S4DB68_TOBAC;tr|A0A1S4DBS8|A0A1S4DBS8_TOBAC;tr|A0A1S4BHQ3|A0A1S4BHQ3_TOBAC;tr|A0A1S3Z6T8|A0A1S3Z6T8_TOBAC	tr|A0A1S3XMU6|A0A1S3XMU6_TOBAC secoisolariciresinol dehydrogenase-like OS=Nicotiana tabacum OX=4097 GN=LOC107766677 PE=4 SV=1;tr|A0A1S3Z724|A0A1S3Z724_TOBAC secoisolariciresinol dehydrogenase-like isoform X2 OS=Nicotiana tabacum OX=4097 GN=LOC107783690 PE=	2	2	2	10.9	10.9	10.9	26.551	154490000	93866000	13116000	56197000	114730000	134000000	79909000	43579000	127230000	141040000	137360000	57550000	81455000	0	0	0	0	58603000	67460000	74883000	63600000	68444000	61245000	67384000	6
tr|A0A1S4DDW7|A0A1S4DDW7_TOBAC;tr|A0A1S4D4H2|A0A1S4D4H2_TOBAC;tr|A0A1S3XYL4|A0A1S3XYL4_TOBAC;tr|A0A1S3XMV0|A0A1S3XMV0_TOBAC;tr|A0A1S3XUU6|A0A1S3XUU6_TOBAC	tr|A0A1S4DDW7|A0A1S4DDW7_TOBAC protein-synthesizing GTPase OS=Nicotiana tabacum OX=4097 GN=LOC107828677 PE=4 SV=1;tr|A0A1S4D4H2|A0A1S4D4H2_TOBAC protein-synthesizing GTPase OS=Nicotiana tabacum OX=4097 GN=LOC107825776 PE=4 SV=1;tr|A0A1S3XYL4|A0A1S3XYL4_TOB	5	5	5	14	14	14	15.58	205560000	282410000	101130000	47464000	222510000	326680000	137930000	46526000	282150000	291240000	510880000	139570000	127480000	0	67432000	57242000	64862000	95227000	66959000	62610000	72061000	103760000	192560000	84017000	12
tr|A0A1S3ZIS6|A0A1S3ZIS6_TOBAC;tr|A0A1S3ZIK1|A0A1S3ZIK1_TOBAC;tr|A0A1S3XMZ5|A0A1S3XMZ5_TOBAC	tr|A0A1S3ZIS6|A0A1S3ZIS6_TOBAC 1,4-dihydroxy-2-naphthoyl-CoA synthase, peroxisomal-like isoform X2 OS=Nicotiana tabacum OX=4097 GN=LOC107787165 PE=3 SV=1;tr|A0A1S3ZIK1|A0A1S3ZIK1_TOBAC 1,4-dihydroxy-2-naphthoyl-CoA synthase, peroxisomal-like isoform X1 OS=	2	2	2	7.9	7.9	7.9	4.5915	143030000	93318000	20236000	28302000	82838000	80451000	199770000	24382000	0	71116000	136230000	18218000	53391000	65293000	0	45795000	0	59204000	181850000	50340000	0	0	71229000	0	4
tr|A0A1S4D9A2|A0A1S4D9A2_TOBAC;tr|A0A1S4D975|A0A1S4D975_TOBAC;tr|A0A1S3ZMY7|A0A1S3ZMY7_TOBAC;tr|A0A1S3ZML9|A0A1S3ZML9_TOBAC;tr|A0A1S3XNA5|A0A1S3XNA5_TOBAC;tr|A0A1S3XN07|A0A1S3XN07_TOBAC;tr|B2LT58|B2LT58_TOBAC;tr|A0A1S3XH72|A0A1S3XH72_TOBAC	tr|A0A1S4D9A2|A0A1S4D9A2_TOBAC elongation factor 1-gamma 2-like isoform X1 OS=Nicotiana tabacum OX=4097 GN=LOC107827359 PE=4 SV=1;tr|A0A1S4D975|A0A1S4D975_TOBAC elongation factor 1-gamma 2-like isoform X2 OS=Nicotiana tabacum OX=4097 GN=LOC107827359 PE=4 S	3	3	3	10.6	10.6	10.6	24.216	211140000	518270000	98584000	100340000	255520000	532970000	207630000	136120000	530700000	371080000	537440000	130290000	110320000	125020000	95611000	105920000	72933000	110850000	101240000	123580000	172750000	105380000	137820000	101370000	22
tr|A0A1S4A9D0|A0A1S4A9D0_TOBAC;tr|A0A1S3XN35|A0A1S3XN35_TOBAC	tr|A0A1S4A9D0|A0A1S4A9D0_TOBAC AAA-ATPase At3g50940-like OS=Nicotiana tabacum OX=4097 GN=LOC107795112 PE=3 SV=1;tr|A0A1S3XN35|A0A1S3XN35_TOBAC AAA-ATPase At3g50940-like OS=Nicotiana tabacum OX=4097 GN=LOC107766870 PE=3 SV=1	3	1	1	10.9	6.4	6.4	26.127	41505000	45194000	33156000	33705000	53684000	73620000	72236000	50518000	63469000	37484000	179280000	40036000	0	0	0	0	0	0	0	0	0	0	0	0	8
tr|A0A1S4A5K2|A0A1S4A5K2_TOBAC;tr|A0A1S3ZQE4|A0A1S3ZQE4_TOBAC;tr|A0A1S3Y8N2|A0A1S3Y8N2_TOBAC;tr|A0A1S3XNA0|A0A1S3XNA0_TOBAC	tr|A0A1S4A5K2|A0A1S4A5K2_TOBAC WD40 repeat-containing protein SMU1 OS=Nicotiana tabacum OX=4097 GN=LOC107793999 PE=3 SV=1;tr|A0A1S3ZQE4|A0A1S3ZQE4_TOBAC suppressor of mec-8 and unc-52 protein homolog 1-like OS=Nicotiana tabacum OX=4097 GN=LOC107789207 PE=3	1	1	1	5.1	5.1	5.1	4.7242	50849000	0	27259000	22116000	74659000	63879000	54717000	43217000	44491000	23931000	54441000	46367000	0	0	0	0	0	0	0	0	0	0	0	0	2
tr|A0A1S3XNA4|A0A1S3XNA4_TOBAC;tr|A0A1S4BRM6|A0A1S4BRM6_TOBAC	tr|A0A1S3XNA4|A0A1S3XNA4_TOBAC Glycosyltransferase OS=Nicotiana tabacum OX=4097 GN=LOC107767027 PE=3 SV=1;tr|A0A1S4BRM6|A0A1S4BRM6_TOBAC Glycosyltransferase OS=Nicotiana tabacum OX=4097 GN=LOC107811171 PE=3 SV=1	2	2	2	7.1	7.1	7.1	5.2798	61756000	88932000	0	28511000	104440000	70406000	47922000	23409000	56768000	69602000	84873000	30275000	0	0	0	0	0	0	0	0	0	0	0	0	6
tr|A0A1S4BVK7|A0A1S4BVK7_TOBAC;tr|A0A1S4BV93|A0A1S4BV93_TOBAC;tr|A0A1S3XNB8|A0A1S3XNB8_TOBAC;tr|A0A1S4BVL8|A0A1S4BVL8_TOBAC	tr|A0A1S4BVK7|A0A1S4BVK7_TOBAC AP-2 complex subunit mu isoform X2 OS=Nicotiana tabacum OX=4097 GN=LOC107812365 PE=3 SV=1;tr|A0A1S4BV93|A0A1S4BV93_TOBAC AP-2 complex subunit mu-like OS=Nicotiana tabacum OX=4097 GN=LOC107812244 PE=3 SV=1;tr|A0A1S3XNB8|A0A1S3	5	5	5	15.3	15.3	15.3	24.012	56130000	148100000	50738000	0	91982000	208910000	45851000	52689000	167700000	228040000	229410000	54529000	35858000	53443000	0	0	0	45706000	0	40609000	38506000	47479000	49770000	40846000	12
tr|A0A1S3XNC2|A0A1S3XNC2_TOBAC;tr|A0A1S4BPI1|A0A1S4BPI1_TOBAC	tr|A0A1S3XNC2|A0A1S3XNC2_TOBAC catechol oxidase OS=Nicotiana tabacum OX=4097 GN=LOC107767076 PE=3 SV=1;tr|A0A1S4BPI1|A0A1S4BPI1_TOBAC catechol oxidase OS=Nicotiana tabacum OX=4097 GN=LOC107810500 PE=3 SV=1	1	1	1	2.8	2.8	2.8	3.5289	0	16094000	0	0	8187400	9213400	0	0	3584100	0	9209000	0	0	0	0	0	0	0	0	0	0	0	0	0	2
tr|A0A1S4DP61|A0A1S4DP61_TOBAC;tr|A0A1S3XNK1|A0A1S3XNK1_TOBAC	tr|A0A1S4DP61|A0A1S4DP61_TOBAC uncharacterized protein LOC107831931 OS=Nicotiana tabacum OX=4097 GN=LOC107831931 PE=4 SV=1;tr|A0A1S3XNK1|A0A1S3XNK1_TOBAC uncharacterized protein LOC107767090 OS=Nicotiana tabacum OX=4097 GN=LOC107767090 PE=4 SV=1	1	1	1	4.9	4.9	4.9	3.8678	14353000	44754000	9813600	14673000	49326000	51604000	39531000	11582000	46550000	34223000	62925000	19544000	0	0	0	0	0	0	0	0	0	0	0	0	3
tr|A0A1S3XNP1|A0A1S3XNP1_TOBAC	tr|A0A1S3XNP1|A0A1S3XNP1_TOBAC polyubiquitin 11-like OS=Nicotiana tabacum OX=4097 GN=LOC107766892 PE=4 SV=1	4	1	1	35.9	17.7	17.7	181.57	525240000	2198900000	420400000	361680000	1643000000	2566700000	623720000	440610000	1094200000	1151200000	2272300000	541370000	346330000	734510000	449780000	409240000	657650000	848340000	409810000	537000000	445370000	425750000	666930000	559630000	24
tr|A0A1S3XNZ8|A0A1S3XNZ8_TOBAC;tr|A0A1S3XNV3|A0A1S3XNV3_TOBAC	tr|A0A1S3XNZ8|A0A1S3XNZ8_TOBAC ABC transporter I family member 11, chloroplastic-like isoform X2 OS=Nicotiana tabacum OX=4097 GN=LOC107767247 PE=4 SV=1;tr|A0A1S3XNV3|A0A1S3XNV3_TOBAC ABC transporter I family member 11, chloroplastic-like isoform X1 OS=Nico	1	1	1	9.3	9.3	9.3	4.7853	20121000	29466000	22439000	9351000	0	23875000	19492000	15755000	29125000	0	18397000	17399000	0	0	0	0	0	0	0	0	0	0	0	0	4
tr|A0A1S4CDW9|A0A1S4CDW9_TOBAC;tr|A0A1S3XP24|A0A1S3XP24_TOBAC	tr|A0A1S4CDW9|A0A1S4CDW9_TOBAC importin subunit beta-1-like OS=Nicotiana tabacum OX=4097 GN=LOC107817967 PE=4 SV=1;tr|A0A1S3XP24|A0A1S3XP24_TOBAC importin subunit beta-1-like OS=Nicotiana tabacum OX=4097 GN=LOC107767272 PE=4 SV=1	1	1	1	3.2	3.2	3.2	11.191	69407000	0	28403000	36071000	67829000	0	0	65497000	197450000	106600000	72325000	39349000	0	0	0	0	0	0	0	0	0	0	0	0	3
tr|A0A1S3XP71|A0A1S3XP71_TOBAC	tr|A0A1S3XP71|A0A1S3XP71_TOBAC Glyceraldehyde-3-phosphate dehydrogenase OS=Nicotiana tabacum OX=4097 GN=LOC107767301 PE=3 SV=1	19	9	1	53	29.2	4	142.51	2235300000	4532500000	1113600000	1280700000	4311100000	7112800000	2643500000	1096100000	3630900000	5687300000	6542200000	2326900000	736780000	613700000	498840000	571920000	806690000	703360000	562990000	516570000	663530000	966420000	920650000	1122900000	126
tr|A0A1S3ZA30|A0A1S3ZA30_TOBAC;tr|A0A1S3XPA3|A0A1S3XPA3_TOBAC	tr|A0A1S3ZA30|A0A1S3ZA30_TOBAC heterogeneous nuclear ribonucleoprotein 1-like OS=Nicotiana tabacum OX=4097 GN=LOC107784632 PE=4 SV=1;tr|A0A1S3XPA3|A0A1S3XPA3_TOBAC heterogeneous nuclear ribonucleoprotein 1-like OS=Nicotiana tabacum OX=4097 GN=LOC107767326	2	2	2	6.1	6.1	6.1	8.5128	157980000	349580000	117670000	150650000	305380000	222420000	191240000	137790000	92853000	93131000	100690000	63318000	0	112780000	101880000	152270000	132290000	89093000	124240000	151720000	0	0	0	0	10
tr|A0A1S4APZ9|A0A1S4APZ9_TOBAC;tr|A0A1S3XPB8|A0A1S3XPB8_TOBAC	tr|A0A1S4APZ9|A0A1S4APZ9_TOBAC protein MITOFERRINLIKE 1, chloroplastic-like OS=Nicotiana tabacum OX=4097 GN=LOC107800125 PE=3 SV=1;tr|A0A1S3XPB8|A0A1S3XPB8_TOBAC protein MITOFERRINLIKE 1, chloroplastic-like OS=Nicotiana tabacum OX=4097 GN=LOC107767100 PE=3	1	1	1	2.2	2.2	2.2	3.8256	0	45869000	0	0	0	0	0	20042000	0	0	0	0	0	0	0	0	0	0	0	0	0	0	0	0	1
tr|Q40556|Q40556_TOBAC;tr|A0A1S4BP54|A0A1S4BP54_TOBAC;tr|A0A1S3XPE4|A0A1S3XPE4_TOBAC	tr|Q40556|Q40556_TOBAC Protein phosphatase 2A OS=Nicotiana tabacum OX=4097 PE=2 SV=1;tr|A0A1S4BP54|A0A1S4BP54_TOBAC serine/threonine-protein phosphatase 2A 65 kDa regulatory subunit A beta isoform OS=Nicotiana tabacum OX=4097 GN=LOC107810392 PE=4 SV=1;tr|A	3	3	2	8.7	8.7	3.9	32.693	104080000	50758000	199650000	18651000	30238000	189060000	43016000	49905000	115570000	13412000	174160000	72523000	107990000	28669000	48036000	28774000	22167000	31605000	37014000	99974000	74550000	0	29094000	115030000	21
tr|A0A1S4A457|A0A1S4A457_TOBAC;tr|A0A1S3XPG1|A0A1S3XPG1_TOBAC	tr|A0A1S4A457|A0A1S4A457_TOBAC protein MSP1-like OS=Nicotiana tabacum OX=4097 GN=LOC107793587 PE=3 SV=1;tr|A0A1S3XPG1|A0A1S3XPG1_TOBAC uncharacterized protein LOC107767135 OS=Nicotiana tabacum OX=4097 GN=LOC107767135 PE=4 SV=1	1	1	1	3.7	3.7	3.7	4.6717	29623000	39800000	28534000	42209000	27694000	30202000	31486000	31011000	30654000	31015000	38894000	29166000	17636000	12244000	27662000	44293000	10818000	11315000	19791000	38509000	11968000	10907000	13849000	27559000	17
tr|A0A1S3XPG2|A0A1S3XPG2_TOBAC;tr|W0KRH1|W0KRH1_TOBAC;tr|A0A1S4DS24|A0A1S4DS24_TOBAC;tr|A0A1S4APX1|A0A1S4APX1_TOBAC;tr|A0A1S4APZ2|A0A1S4APZ2_TOBAC;tr|A0A1S4DS03|A0A1S4DS03_TOBAC;tr|A0A1S4CIZ9|A0A1S4CIZ9_TOBAC	tr|A0A1S3XPG2|A0A1S3XPG2_TOBAC Superoxide dismutase OS=Nicotiana tabacum OX=4097 GN=LOC107767307 PE=3 SV=1;tr|W0KRH1|W0KRH1_TOBAC Superoxide dismutase OS=Nicotiana tabacum OX=4097 GN=LOC107805394 PE=2 SV=1;tr|A0A1S4DS24|A0A1S4DS24_TOBAC Superoxide dismutas	2	2	2	10.4	10.4	10.4	4.004	98326000	41344000	54326000	14045000	137260000	70450000	63130000	22220000	195970000	35271000	70457000	81464000	0	0	0	0	0	0	0	0	0	0	0	0	2
tr|A0A1S4DAF8|A0A1S4DAF8_TOBAC;tr|A0A1S3XPI8|A0A1S3XPI8_TOBAC	tr|A0A1S4DAF8|A0A1S4DAF8_TOBAC C-terminal binding protein AN-like OS=Nicotiana tabacum OX=4097 GN=LOC107827726 PE=4 SV=1;tr|A0A1S3XPI8|A0A1S3XPI8_TOBAC C-terminal binding protein AN-like OS=Nicotiana tabacum OX=4097 GN=LOC107767382 PE=4 SV=1	1	1	1	2.2	2.2	2.2	4.514	23625000	112950000	17960000	16893000	32257000	69175000	31140000	0	0	127600000	0	14178000	0	0	0	0	0	0	0	0	0	0	0	0	1
tr|A0A1S4B2L1|A0A1S4B2L1_TOBAC;tr|A0A1S3XPP1|A0A1S3XPP1_TOBAC;tr|A0A1S3XPL8|A0A1S3XPL8_TOBAC;tr|A0A1S4CFM0|A0A1S4CFM0_TOBAC;tr|A0A1S3ZEA4|A0A1S3ZEA4_TOBAC;tr|A0A1S4AIS1|A0A1S4AIS1_TOBAC	tr|A0A1S4B2L1|A0A1S4B2L1_TOBAC threonine synthase OS=Nicotiana tabacum OX=4097 GN=LOC107803812 PE=3 SV=1;tr|A0A1S3XPP1|A0A1S3XPP1_TOBAC threonine synthase OS=Nicotiana tabacum OX=4097 GN=LOC107767400 PE=3 SV=1;tr|A0A1S3XPL8|A0A1S3XPL8_TOBAC threonine synth	5	5	5	11.7	11.7	11.7	22.766	86561000	10855000	344330	5545000	58652000	106240000	16433000	21347000	34164000	30953000	75774000	34619000	41497000	0	0	0	0	29438000	0	33415000	0	0	35233000	29990000	5
tr|Q8S9G3|Q8S9G3_TOBAC;tr|A0A1S3XPW7|A0A1S3XPW7_TOBAC	tr|Q8S9G3|Q8S9G3_TOBAC Putative 16kDa membrane protein OS=Nicotiana tabacum OX=4097 GN=LOC107784985 PE=2 SV=1;tr|A0A1S3XPW7|A0A1S3XPW7_TOBAC photosystem I subunit O-like OS=Nicotiana tabacum OX=4097 GN=LOC107767419 PE=4 SV=1	3	3	3	20.3	20.3	20.3	183.08	1728700000	1503000000	844000000	639950000	684750000	839600000	725860000	628550000	1144800000	323120000	933410000	396070000	503970000	232420000	476410000	409770000	300810000	261990000	395570000	691090000	289370000	122320000	189970000	362300000	47
tr|A0A1S3XQ22|A0A1S3XQ22_TOBAC;tr|A0A1S4BUV2|A0A1S4BUV2_TOBAC;tr|A0A1S4BYR0|A0A1S4BYR0_TOBAC	tr|A0A1S3XQ22|A0A1S3XQ22_TOBAC putidaredoxin-like OS=Nicotiana tabacum OX=4097 GN=LOC107767508 PE=4 SV=1;tr|A0A1S4BUV2|A0A1S4BUV2_TOBAC putidaredoxin-like OS=Nicotiana tabacum OX=4097 GN=LOC107812133 PE=4 SV=1;tr|A0A1S4BYR0|A0A1S4BYR0_TOBAC 2Fe-2S ferredox	1	1	1	7.4	7.4	7.4	4.1757	12904000	68897000	0	0	0	135470000	62505000	22733000	73580000	94045000	71019000	16269000	0	0	0	0	0	0	0	0	0	0	0	0	3
tr|A0A1S3XQ62|A0A1S3XQ62_TOBAC	tr|A0A1S3XQ62|A0A1S3XQ62_TOBAC Fructose-bisphosphate aldolase OS=Nicotiana tabacum OX=4097 GN=LOC107767559 PE=3 SV=1	9	1	1	40.2	2.8	2.8	3.626	32582000	0	37746000	0	0	134500000	28432000	21085000	132320000	182140000	202770000	22090000	0	0	0	0	0	0	0	0	0	0	0	0	6
tr|A0A1S4DC09|A0A1S4DC09_TOBAC;tr|A0A1S3XQ99|A0A1S3XQ99_TOBAC	tr|A0A1S4DC09|A0A1S4DC09_TOBAC CBS domain-containing protein CBSX3, mitochondrial-like OS=Nicotiana tabacum OX=4097 GN=LOC107828185 PE=4 SV=1;tr|A0A1S3XQ99|A0A1S3XQ99_TOBAC CBS domain-containing protein CBSX3, mitochondrial-like OS=Nicotiana tabacum OX=409	2	2	2	10.2	10.2	10.2	3.7923	32927000	150320000	41147	25902000	57119000	172110000	47140000	26764000	110220000	135140000	134250000	18488000	0	0	0	0	41383000	74575000	0	0	73955000	66995000	0	0	5
tr|A0A1S3XQA4|A0A1S3XQA4_TOBAC	tr|A0A1S3XQA4|A0A1S3XQA4_TOBAC Coatomer subunit delta OS=Nicotiana tabacum OX=4097 GN=LOC107767589 PE=3 SV=1	8	8	2	18.5	18.5	4.9	40.437	660610000	842670000	286770000	291890000	848390000	1134200000	289790000	174950000	900790000	1062600000	741700000	359590000	306860000	185290000	169600000	189940000	201330000	232010000	145990000	163240000	178230000	226630000	158250000	230760000	41
tr|A0A1S3YNS5|A0A1S3YNS5_TOBAC;tr|A0A1S3XQB9|A0A1S3XQB9_TOBAC	tr|A0A1S3YNS5|A0A1S3YNS5_TOBAC tropinone reductase homolog At5g06060-like OS=Nicotiana tabacum OX=4097 GN=LOC107778082 PE=4 SV=1;tr|A0A1S3XQB9|A0A1S3XQB9_TOBAC tropinone reductase homolog At5g06060-like OS=Nicotiana tabacum OX=4097 GN=LOC107767554 PE=4 SV=	1	1	1	4.1	4.1	4.1	26.748	22192000	0	0	0	500720000	205970000	317820000	26366000	169910000	359880000	642160000	20236000	0	0	0	0	142350000	62273000	232150000	35674000	60188000	139390000	241160000	0	7
tr|A0A1S3XQI1|A0A1S3XQI1_TOBAC;tr|A0A1S4BJ75|A0A1S4BJ75_TOBAC;tr|A0A1S3YNY2|A0A1S3YNY2_TOBAC;tr|A0A1S3YAQ5|A0A1S3YAQ5_TOBAC;tr|A0A1S3Y7B9|A0A1S3Y7B9_TOBAC;tr|A0A1S3YBD3|A0A1S3YBD3_TOBAC;tr|A0A1S3Y3Z2|A0A1S3Y3Z2_TOBAC;tr|A0A1S4DEY6|A0A1S4DEY6_TOBAC;tr|A0A1S3Y3Y5|A0A1S3Y3Y5_TOBAC;tr|A0A1S4DE44|A0A1S4DE44_TOBAC;tr|A0A1S4DED2|A0A1S4DED2_TOBAC	tr|A0A1S3XQI1|A0A1S3XQI1_TOBAC ABC transporter G family member 11-like OS=Nicotiana tabacum OX=4097 GN=LOC107767441 PE=4 SV=1;tr|A0A1S4BJ75|A0A1S4BJ75_TOBAC ABC transporter G family member 11-like OS=Nicotiana tabacum OX=4097 GN=LOC107808850 PE=4 SV=1;tr|A	2	2	2	5.3	5.3	5.3	5.9506	39912000	0	24857000	109750000	133080000	118240000	48819000	12328000	54497000	97131000	82523000	209620000	0	0	0	0	0	0	0	0	0	0	0	0	1
tr|A0A1S3XQI4|A0A1S3XQI4_TOBAC;tr|A0A1S3XU76|A0A1S3XU76_TOBAC;tr|Q6TKQ9|Q6TKQ9_TOBAC	tr|A0A1S3XQI4|A0A1S3XQI4_TOBAC 60S ribosomal protein L3-2 OS=Nicotiana tabacum OX=4097 GN=LOC107767586 PE=3 SV=1;tr|A0A1S3XU76|A0A1S3XU76_TOBAC 60S ribosomal protein L3-2-like OS=Nicotiana tabacum OX=4097 GN=LOC107768788 PE=3 SV=1;tr|Q6TKQ9|Q6TKQ9_TOBAC Ri	15	4	4	36	12.3	12.3	25.576	229410000	802460000	116490000	261080000	396650000	513350000	289030000	148010000	318900000	445620000	428640000	94722000	90222000	147410000	78768000	157240000	105750000	96200000	99017000	87822000	76897000	97192000	89518000	49299000	33
tr|A0A1S3XQJ5|A0A1S3XQJ5_TOBAC	tr|A0A1S3XQJ5|A0A1S3XQJ5_TOBAC aluminum-activated malate transporter 12-like OS=Nicotiana tabacum OX=4097 GN=LOC107767455 PE=3 SV=1	1	1	1	4.2	4.2	4.2	-2	0	358110000	245210000	165150000	101360000	167120000	161140000	121060000	0	98744000	0	199640000	0	0	0	0	0	0	0	0	0	0	0	0	1
tr|A0A1S3XQN4|A0A1S3XQN4_TOBAC	tr|A0A1S3XQN4|A0A1S3XQN4_TOBAC uncharacterized protein LOC107767698 OS=Nicotiana tabacum OX=4097 GN=LOC107767698 PE=4 SV=1	1	1	1	4.3	4.3	4.3	-2	131630000	35964000	0	217820000	185060000	310780000	107130000	30538000	202220000	0	0	120470000	0	0	0	0	0	0	0	0	0	0	0	0	2
tr|A0A1S4CQ40|A0A1S4CQ40_TOBAC;tr|A0A1S3XQR5|A0A1S3XQR5_TOBAC	tr|A0A1S4CQ40|A0A1S4CQ40_TOBAC Fructose-bisphosphate aldolase OS=Nicotiana tabacum OX=4097 GN=LOC107821177 PE=3 SV=1;tr|A0A1S3XQR5|A0A1S3XQR5_TOBAC Fructose-bisphosphate aldolase OS=Nicotiana tabacum OX=4097 GN=LOC107767727 PE=3 SV=1	5	5	5	19.6	19.6	19.6	62.061	247790000	309650000	100710000	62544000	131710000	509050000	112220000	95682000	1200100000	481980000	852280000	146570000	96378000	59019000	70751000	58493000	30751000	97389000	61051000	98504000	281930000	63901000	143810000	111410000	22
tr|A0A1S4BB21|A0A1S4BB21_TOBAC;tr|A0A1S3XQU9|A0A1S3XQU9_TOBAC	tr|A0A1S4BB21|A0A1S4BB21_TOBAC Pectin acetylesterase OS=Nicotiana tabacum OX=4097 GN=LOC107806382 PE=3 SV=1;tr|A0A1S3XQU9|A0A1S3XQU9_TOBAC Pectin acetylesterase OS=Nicotiana tabacum OX=4097 GN=LOC107767541 PE=3 SV=1	6	6	6	19.4	19.4	19.4	25.113	448760000	581360000	298080000	259130000	276310000	241530000	134630000	27365000	181580000	161900000	185440000	164530000	156830000	73753000	166310000	115560000	42184000	40020000	46956000	38911000	49618000	59441000	63222000	84909000	15
tr|A0A1S4BBI5|A0A1S4BBI5_TOBAC;tr|A0A1S4BWB2|A0A1S4BWB2_TOBAC;tr|A0A1S3XR71|A0A1S3XR71_TOBAC;tr|A0A1S4BW52|A0A1S4BW52_TOBAC;tr|A0A1S4BVW9|A0A1S4BVW9_TOBAC;tr|A0A1S4BVS2|A0A1S4BVS2_TOBAC;tr|A0A1S4BVJ5|A0A1S4BVJ5_TOBAC	tr|A0A1S4BBI5|A0A1S4BBI5_TOBAC Carbonic anhydrase OS=Nicotiana tabacum OX=4097 GN=LOC107806576 PE=3 SV=1;tr|A0A1S4BWB2|A0A1S4BWB2_TOBAC Carbonic anhydrase OS=Nicotiana tabacum OX=4097 GN=LOC107812321 PE=3 SV=1;tr|A0A1S3XR71|A0A1S3XR71_TOBAC Carbonic anhydr	1	1	1	9.1	9.1	9.1	4.343	428790000	1180700000	308600000	232190000	559370000	679160000	304850000	948370000	787520000	672140000	1511000000	309520000	352860000	480840000	404790000	291430000	310600000	247790000	252130000	1112100000	378600000	0	570880000	398170000	14
tr|A0A1S3XRF6|A0A1S3XRF6_TOBAC	tr|A0A1S3XRF6|A0A1S3XRF6_TOBAC mitochondrial adenine nucleotide transporter ADNT1-like OS=Nicotiana tabacum OX=4097 GN=LOC107767938 PE=3 SV=1	3	1	1	8.5	3.7	3.7	2.4734	0	0	5608200	0	0	22217000	0	9641200	22608000	38745000	0	0	0	0	0	0	0	0	0	0	0	0	0	0	2
tr|A0A1S3XRI3|A0A1S3XRI3_TOBAC;tr|A0A1S4BHU2|A0A1S4BHU2_TOBAC	tr|A0A1S3XRI3|A0A1S3XRI3_TOBAC protein transport protein SEC24-like OS=Nicotiana tabacum OX=4097 GN=LOC107767726 PE=4 SV=1;tr|A0A1S4BHU2|A0A1S4BHU2_TOBAC protein transport protein SEC24-like OS=Nicotiana tabacum OX=4097 GN=LOC107808424 PE=4 SV=1	2	2	2	4.7	4.7	4.7	5.2234	23757000	6915700	11124000	0	25068000	30896000	45392000	16160000	34617000	33235000	32033000	20566000	0	0	0	0	23032000	18667000	26622000	0	20121000	20699000	0	0	4
tr|A0A1S3XRM3|A0A1S3XRM3_TOBAC;tr|Q5EFR4|Q5EFR4_TOBAC;tr|Q53UI6|Q53UI6_TOBAC;tr|A0A1S4C967|A0A1S4C967_TOBAC	tr|A0A1S3XRM3|A0A1S3XRM3_TOBAC oxygen-evolving enhancer protein 3-2, chloroplastic-like OS=Nicotiana tabacum OX=4097 GN=LOC107767928 PE=3 SV=1;tr|Q5EFR4|Q5EFR4_TOBAC Chloroplast oxygen-evolving protein 16 kDa subunit OS=Nicotiana tabacum OX=4097 GN=psbQ PE	9	9	9	34.6	34.6	34.6	79.25	5139900000	12159000000	2851600000	3694500000	6510400000	9936000000	5323300000	2918200000	7864900000	9436300000	14255000000	3763600000	2583400000	2709200000	2166800000	3067300000	1985900000	2499900000	2413600000	2802900000	2354300000	2564700000	3341100000	2816500000	117
tr|A0A1S4AFD5|A0A1S4AFD5_TOBAC;tr|A0A1S3XRN0|A0A1S3XRN0_TOBAC	tr|A0A1S4AFD5|A0A1S4AFD5_TOBAC Photosystem II reaction center Psb28 protein OS=Nicotiana tabacum OX=4097 GN=LOC107797030 PE=3 SV=1;tr|A0A1S3XRN0|A0A1S3XRN0_TOBAC Photosystem II reaction center Psb28 protein OS=Nicotiana tabacum OX=4097 GN=LOC107768014 PE=3	1	1	1	8.9	8.9	8.9	13.648	0	0	0	0	0	82768000	0	22166000	203690000	185770000	106690000	24880000	0	0	0	0	0	0	0	0	0	0	0	0	4
tr|A0A1S3YXP2|A0A1S3YXP2_TOBAC;tr|A0A1S3XRX3|A0A1S3XRX3_TOBAC	tr|A0A1S3YXP2|A0A1S3YXP2_TOBAC NAD(P)H-quinone oxidoreductase subunit U, chloroplastic-like OS=Nicotiana tabacum OX=4097 GN=LOC107780992 PE=4 SV=1;tr|A0A1S3XRX3|A0A1S3XRX3_TOBAC NAD(P)H-quinone oxidoreductase subunit U, chloroplastic-like OS=Nicotiana taba	1	1	1	6.8	6.8	6.8	3.6694	0	144270000	56048000	0	130910000	115680000	0	0	186180000	142960000	188610000	48115000	0	0	0	0	0	0	0	0	0	0	0	0	1
tr|A0A1S4CM36|A0A1S4CM36_TOBAC;tr|A0A1S3Z4I0|A0A1S3Z4I0_TOBAC;tr|A0A1S3YJ73|A0A1S3YJ73_TOBAC;tr|A0A1S3XS39|A0A1S3XS39_TOBAC	tr|A0A1S4CM36|A0A1S4CM36_TOBAC Small nuclear ribonucleoprotein Sm D1 OS=Nicotiana tabacum OX=4097 GN=LOC107820528 PE=3 SV=1;tr|A0A1S3Z4I0|A0A1S3Z4I0_TOBAC Small nuclear ribonucleoprotein Sm D1 OS=Nicotiana tabacum OX=4097 GN=LOC107782700 PE=3 SV=1;tr|A0A1S	2	2	2	27.2	27.2	27.2	9.9281	1577100000	454650000	33703000	87798000	153780000	5234700000	949810000	98288000	195290000	576160000	232650000	114440000	0	398200000	0	162030000	143880000	1346200000	1153100000	0	218460000	497200000	164310000	214950000	16
tr|A0A1S3XS72|A0A1S3XS72_TOBAC	tr|A0A1S3XS72|A0A1S3XS72_TOBAC uncharacterized methyltransferase At2g41040, chloroplastic-like OS=Nicotiana tabacum OX=4097 GN=LOC107768213 PE=4 SV=1	1	1	1	2.9	2.9	2.9	2.9627	0	59499000	15886000	0	0	0	0	15123000	0	0	0	0	0	0	0	0	0	0	0	0	0	0	0	0	1
tr|A0A1S3XS86|A0A1S3XS86_TOBAC	tr|A0A1S3XS86|A0A1S3XS86_TOBAC chaperone protein ClpB1-like OS=Nicotiana tabacum OX=4097 GN=LOC107767950 PE=3 SV=1	1	1	1	3	3	3	5.3443	0	0	31382000	9901300	0	29339000	32917000	12644000	27222000	0	26174000	0	0	0	0	0	0	0	0	0	0	0	0	0	2
tr|A0A1S3YZR9|A0A1S3YZR9_TOBAC;tr|A0A1S3XSD1|A0A1S3XSD1_TOBAC	tr|A0A1S3YZR9|A0A1S3YZR9_TOBAC HMG1/2-like protein OS=Nicotiana tabacum OX=4097 GN=LOC107781188 PE=3 SV=1;tr|A0A1S3XSD1|A0A1S3XSD1_TOBAC HMG1/2-like protein OS=Nicotiana tabacum OX=4097 GN=LOC107767998 PE=3 SV=1	1	1	1	10.1	10.1	10.1	4.3467	33184000	0	24240000	21630000	19673000	46004000	0	26974000	33057000	13459000	58663000	14435000	0	0	0	0	0	0	0	0	0	0	0	0	2
tr|A0A1S4BQE6|A0A1S4BQE6_TOBAC;tr|A0A1S3XSK5|A0A1S3XSK5_TOBAC;tr|A0A1S3ZFG6|A0A1S3ZFG6_TOBAC	tr|A0A1S4BQE6|A0A1S4BQE6_TOBAC 50S ribosomal protein L22, chloroplastic-like OS=Nicotiana tabacum OX=4097 GN=LOC107810798 PE=3 SV=1;tr|A0A1S3XSK5|A0A1S3XSK5_TOBAC 50S ribosomal protein L22, chloroplastic-like OS=Nicotiana tabacum OX=4097 GN=LOC107768257 PE	5	5	5	20.3	20.3	20.3	11.627	42318000	140150000	50743000	52470000	133350000	152410000	311090000	31265000	90638000	132070000	94070000	54859000	31537000	0	34724000	36044000	69899000	62153000	105910000	36416000	0	33463000	40086000	31900000	17
tr|A0A1S3XSM1|A0A1S3XSM1_TOBAC;tr|A0A1S4BCH2|A0A1S4BCH2_TOBAC	tr|A0A1S3XSM1|A0A1S3XSM1_TOBAC uncharacterized protein LOC107768083 OS=Nicotiana tabacum OX=4097 GN=LOC107768083 PE=4 SV=1;tr|A0A1S4BCH2|A0A1S4BCH2_TOBAC syntaxin-binding protein 5-like OS=Nicotiana tabacum OX=4097 GN=LOC107806793 PE=4 SV=1	3	3	3	3.1	3.1	3.1	10.567	43669000	81450000	15552000	54827000	178910000	230770000	92747000	52827000	139670000	159720000	168820000	111570000	0	0	0	0	0	0	50784000	0	0	0	43929000	72712000	3
tr|A0A1S3Z4N4|A0A1S3Z4N4_TOBAC;tr|A0A1S3XSR0|A0A1S3XSR0_TOBAC	tr|A0A1S3Z4N4|A0A1S3Z4N4_TOBAC 50S ribosomal protein L15, chloroplastic-like OS=Nicotiana tabacum OX=4097 GN=LOC107782923 PE=3 SV=1;tr|A0A1S3XSR0|A0A1S3XSR0_TOBAC 50S ribosomal protein L15, chloroplastic-like OS=Nicotiana tabacum OX=4097 GN=LOC107768370 PE	5	5	5	22.1	22.1	22.1	37.847	122520000	798830000	97225000	135280000	311210000	531970000	178170000	52744000	243120000	266770000	307580000	36352000	79082000	217130000	39909000	66235000	147200000	151120000	174140000	37505000	126240000	130520000	120820000	18633000	33
tr|A0A1S3XSW1|A0A1S3XSW1_TOBAC;tr|A0A1S4AKG1|A0A1S4AKG1_TOBAC;tr|W8S2M6|W8S2M6_TOBAC	tr|A0A1S3XSW1|A0A1S3XSW1_TOBAC UDP-sulfoquinovose synthase, chloroplastic-like OS=Nicotiana tabacum OX=4097 GN=LOC107768419 PE=4 SV=1;tr|A0A1S4AKG1|A0A1S4AKG1_TOBAC UDP-sulfoquinovose synthase, chloroplastic-like OS=Nicotiana tabacum OX=4097 GN=LOC10779863	4	4	4	13.3	13.3	13.3	27.561	101280000	87597000	57632000	79648000	118050000	416050000	227170000	126810000	208080000	313040000	297990000	136670000	78624000	0	69686000	104300000	59702000	87672000	124040000	157630000	90967000	125560000	98656000	138640000	23
tr|O24141|O24141_TOBAC;tr|A0A1S4APR8|A0A1S4APR8_TOBAC;tr|A0A1S3XT40|A0A1S3XT40_TOBAC;tr|A0A1S4CTR1|A0A1S4CTR1_TOBAC;tr|A0A1S3XGJ1|A0A1S3XGJ1_TOBAC	tr|O24141|O24141_TOBAC Plastid-lipid-Associated Protein (Fragment) OS=Nicotiana tabacum OX=4097 GN=pap PE=4 SV=1;tr|A0A1S4APR8|A0A1S4APR8_TOBAC light-induced protein, chloroplastic-like OS=Nicotiana tabacum OX=4097 GN=LOC107800124 PE=4 SV=1;tr|A0A1S3XT40|A	3	3	3	12.2	12.2	12.2	8.7342	47437000	281040000	36886000	34001000	27755000	92630000	101410000	42689000	88937000	122540000	206110000	26199000	26693000	44069000	41464000	31810000	0	35625000	37397000	37242000	49802000	46160000	85491000	32736000	6
tr|A0A1S4A1F5|A0A1S4A1F5_TOBAC;tr|A0A1S3XT93|A0A1S3XT93_TOBAC	tr|A0A1S4A1F5|A0A1S4A1F5_TOBAC uncharacterized protein LOC107792708 OS=Nicotiana tabacum OX=4097 GN=LOC107792708 PE=4 SV=1;tr|A0A1S3XT93|A0A1S3XT93_TOBAC uncharacterized protein LOC107768484 OS=Nicotiana tabacum OX=4097 GN=LOC107768484 PE=4 SV=1	3	3	3	11.9	11.9	11.9	44.743	205020000	190920000	170350000	125060000	212890000	209350000	214080000	77480000	196460000	170360000	251700000	97013000	85320000	75424000	97785000	90963000	59932000	42636000	103870000	82151000	54513000	41521000	59697000	64041000	15
tr|A0A1S4C1G1|A0A1S4C1G1_TOBAC;tr|A0A1S3XTA8|A0A1S3XTA8_TOBAC	tr|A0A1S4C1G1|A0A1S4C1G1_TOBAC Proteasome subunit alpha type OS=Nicotiana tabacum OX=4097 GN=LOC107814160 PE=3 SV=1;tr|A0A1S3XTA8|A0A1S3XTA8_TOBAC Proteasome subunit alpha type OS=Nicotiana tabacum OX=4097 GN=LOC107768309 PE=3 SV=1	1	1	1	6.5	6.5	6.5	5.063	64067000	52416000	25640000	27451000	133780000	66736000	21870000	10080000	70235000	138720000	77171000	35400000	0	0	0	0	0	0	0	0	0	0	0	0	1
tr|A0A1S4DLF6|A0A1S4DLF6_TOBAC;tr|A0A1S3XTD5|A0A1S3XTD5_TOBAC	tr|A0A1S4DLF6|A0A1S4DLF6_TOBAC K(+) efflux antiporter 2, chloroplastic-like isoform X1 OS=Nicotiana tabacum OX=4097 GN=LOC107831030 PE=4 SV=1;tr|A0A1S3XTD5|A0A1S3XTD5_TOBAC K(+) efflux antiporter 2, chloroplastic-like OS=Nicotiana tabacum OX=4097 GN=LOC107	3	3	3	6.1	6.1	6.1	22.691	182420000	135710000	80689000	66937000	148050000	117240000	53386000	22989000	143490000	82273000	169680000	88432000	85435000	0	58807000	55635000	54190000	58133000	0	0	0	31661000	48937000	52188000	5
tr|A0A1S3XTD8|A0A1S3XTD8_TOBAC;tr|A0A1S3XTK1|A0A1S3XTK1_TOBAC;tr|A0A1S3XTH7|A0A1S3XTH7_TOBAC;tr|A0A1S4DDT2|A0A1S4DDT2_TOBAC;tr|A0A1S3ZG94|A0A1S3ZG94_TOBAC;tr|A0A1S3ZGK7|A0A1S3ZGK7_TOBAC;tr|A0A1S4DEF1|A0A1S4DEF1_TOBAC;tr|A0A1S4DE42|A0A1S4DE42_TOBAC;tr|A0A1S4BY86|A0A1S4BY86_TOBAC;tr|A0A1S4BYJ6|A0A1S4BYJ6_TOBAC;tr|A0A1S4A3G1|A0A1S4A3G1_TOBAC;tr|A0A1S4BYE0|A0A1S4BYE0_TOBAC;tr|A0A1S4A3C0|A0A1S4A3C0_TO…	tr|A0A1S3XTD8|A0A1S3XTD8_TOBAC serine/threonine-protein phosphatase 6 regulatory subunit 3-like isoform X3 OS=Nicotiana tabacum OX=4097 GN=LOC107768579 PE=3 SV=1;tr|A0A1S3XTK1|A0A1S3XTK1_TOBAC serine/threonine-protein phosphatase 6 regulatory subunit 3-lik	6	6	6	10.4	10.4	10.4	28.642	568340000	756010000	531450000	299490000	728650000	862790000	581230000	276020000	707140000	534780000	836880000	483730000	357670000	156050000	318370000	247030000	201050000	266650000	373130000	181310000	238950000	183210000	223900000	327240000	15
tr|A0A1S4B5W4|A0A1S4B5W4_TOBAC;tr|A0A1S3ZJF7|A0A1S3ZJF7_TOBAC;tr|A0A1S3XTE7|A0A1S3XTE7_TOBAC	tr|A0A1S4B5W4|A0A1S4B5W4_TOBAC Expansin OS=Nicotiana tabacum OX=4097 GN=LOC107804813 PE=3 SV=1;tr|A0A1S3ZJF7|A0A1S3ZJF7_TOBAC Expansin OS=Nicotiana tabacum OX=4097 GN=LOC107787480 PE=3 SV=1;tr|A0A1S3XTE7|A0A1S3XTE7_TOBAC Expansin OS=Nicotiana tabacum OX=40	1	1	1	3.8	3.8	3.8	2.3345	63476000	35105000	49768000	48191000	120020000	129150000	84245000	63700000	98189000	134360000	130970000	45659000	0	0	0	0	0	0	0	0	0	0	0	0	7
tr|A0A1S3Z3P2|A0A1S3Z3P2_TOBAC;tr|A0A1S3XTE9|A0A1S3XTE9_TOBAC;tr|A0A1S3ZVW1|A0A1S3ZVW1_TOBAC;tr|A0A1S4A260|A0A1S4A260_TOBAC;tr|A0A1S4A204|A0A1S4A204_TOBAC	tr|A0A1S3Z3P2|A0A1S3Z3P2_TOBAC pentatricopeptide repeat-containing protein At2g15690-like OS=Nicotiana tabacum OX=4097 GN=LOC107782664 PE=3 SV=1;tr|A0A1S3XTE9|A0A1S3XTE9_TOBAC pentatricopeptide repeat-containing protein At2g15690-like OS=Nicotiana tabacum	1	1	1	2.8	2.8	2.8	3.1088	20011000	47181000	11956000	7557700	19543000	23394000	0	7556900	26260000	30569000	32364000	11765000	0	0	0	0	0	0	0	0	0	0	0	0	1
tr|A0A1S3XTF3|A0A1S3XTF3_TOBAC	tr|A0A1S3XTF3|A0A1S3XTF3_TOBAC 40S ribosomal protein S7 OS=Nicotiana tabacum OX=4097 GN=LOC107768552 PE=3 SV=1	6	6	1	45.5	45.5	14.7	188.58	3303600000	7173400000	2572600000	2343100000	6678000000	6029800000	3292500000	2300000000	2653700000	2836000000	3511900000	1878600000	2082800000	1978900000	2480000000	2484500000	1984600000	1349300000	1812600000	2001400000	1264200000	1170400000	1074800000	1973000000	84
tr|A0A1S3XTF7|A0A1S3XTF7_TOBAC	tr|A0A1S3XTF7|A0A1S3XTF7_TOBAC 40S ribosomal protein S8 OS=Nicotiana tabacum OX=4097 GN=LOC107768559 PE=3 SV=1	6	1	1	31.4	6.3	6.3	11.94	60704000	0	0	44570000	281780000	99556000	66767000	20702000	207340000	118280000	127590000	32219000	0	0	0	0	0	0	0	0	0	0	0	0	6
tr|U3PLK3|U3PLK3_TOBAC;tr|A0A1S4AV83|A0A1S4AV83_TOBAC;tr|A0A1S3XTG6|A0A1S3XTG6_TOBAC	tr|U3PLK3|U3PLK3_TOBAC Leucine aminopeptidase OS=Nicotiana tabacum OX=4097 GN=lap2 PE=2 SV=1;tr|A0A1S4AV83|A0A1S4AV83_TOBAC leucine aminopeptidase 2, chloroplastic-like OS=Nicotiana tabacum OX=4097 GN=LOC107801578 PE=3 SV=1;tr|A0A1S3XTG6|A0A1S3XTG6_TOBAC l	3	3	3	6.6	6.6	6.6	12.632	45972000	225950000	29679000	25512000	39856000	103720000	0	0	113130000	72972000	60686000	0	0	0	0	0	20304000	24993000	0	0	34588000	17973000	0	0	4
tr|A0A1S3XTS7|A0A1S3XTS7_TOBAC;tr|A0A1S3XUA8|A0A1S3XUA8_TOBAC;tr|A0A1S4AKZ7|A0A1S4AKZ7_TOBAC	tr|A0A1S3XTS7|A0A1S3XTS7_TOBAC copper-transporting ATPase RAN1-like isoform X5 OS=Nicotiana tabacum OX=4097 GN=LOC107768661 PE=3 SV=1;tr|A0A1S3XUA8|A0A1S3XUA8_TOBAC copper-transporting ATPase RAN1-like isoform X1 OS=Nicotiana tabacum OX=4097 GN=LOC10776866	1	1	1	1.6	1.6	1.6	5.7329	11387000	36121000	11665000	0	23134000	0	0	0	0	20810000	0	0	0	0	0	0	0	0	0	0	0	0	0	0	0
tr|A0A1S4BE47|A0A1S4BE47_TOBAC;tr|A0A1S3XU09|A0A1S3XU09_TOBAC;tr|A0A1S4BE88|A0A1S4BE88_TOBAC;tr|A0A1S3XTT0|A0A1S3XTT0_TOBAC;tr|A0A1S4BE72|A0A1S4BE72_TOBAC	tr|A0A1S4BE47|A0A1S4BE47_TOBAC uroporphyrinogen decarboxylase OS=Nicotiana tabacum OX=4097 GN=LOC107807289 PE=3 SV=1;tr|A0A1S3XU09|A0A1S3XU09_TOBAC uroporphyrinogen decarboxylase OS=Nicotiana tabacum OX=4097 GN=LOC107768723 PE=3 SV=1;tr|A0A1S4BE88|A0A1S4BE	5	5	4	27.6	27.6	22.2	32.753	347810000	381690000	177950000	125770000	376680000	294250000	204820000	124980000	523610000	541820000	576510000	228310000	113250000	75690000	146610000	111540000	73822000	42812000	68459000	136540000	109620000	78404000	121850000	167860000	17
tr|A0A1S3XTW2|A0A1S3XTW2_TOBAC	tr|A0A1S3XTW2|A0A1S3XTW2_TOBAC Pectinesterase OS=Nicotiana tabacum OX=4097 GN=LOC107768747 PE=3 SV=1	1	1	1	2	2	2	-2	38392000	44268000	14625000	16341000	37743000	30923000	0	6739600	0	38340000	44704000	9234200	0	0	0	0	0	0	0	0	0	0	0	0	2
tr|A0A1S4CUE3|A0A1S4CUE3_TOBAC;tr|A0A1S3XTY2|A0A1S3XTY2_TOBAC	tr|A0A1S4CUE3|A0A1S4CUE3_TOBAC tetratricopeptide repeat protein 28-like OS=Nicotiana tabacum OX=4097 GN=LOC107822688 PE=4 SV=1;tr|A0A1S3XTY2|A0A1S3XTY2_TOBAC tetratricopeptide repeat protein 28-like OS=Nicotiana tabacum OX=4097 GN=LOC107768771 PE=4 SV=1	1	1	1	1	1	1	4.1578	96366000	335960000	146580000	216380000	510940000	495510000	0	0	269290000	414020000	573770000	76345000	0	0	0	0	0	0	0	0	0	0	0	0	4
tr|A0A1S3XU22|A0A1S3XU22_TOBAC;tr|A0A1S3XU23|A0A1S3XU23_TOBAC;tr|A0A1S4C8X1|A0A1S4C8X1_TOBAC;tr|A0A1S3X1J4|A0A1S3X1J4_TOBAC;tr|A0A1S4BK59|A0A1S4BK59_TOBAC	tr|A0A1S3XU22|A0A1S3XU22_TOBAC plastoglobulin-1, chloroplastic-like isoform X2 OS=Nicotiana tabacum OX=4097 GN=LOC107768802 PE=4 SV=1;tr|A0A1S3XU23|A0A1S3XU23_TOBAC plastoglobulin-1, chloroplastic-like isoform X1 OS=Nicotiana tabacum OX=4097 GN=LOC10776880	2	2	2	7.3	7.3	7.3	4.9519	114370000	0	53909000	59177000	94103000	0	0	24744000	0	0	67018000	0	68856000	0	46156000	50378000	39122000	0	0	0	0	0	0	0	4
tr|A0A1S3XU32|A0A1S3XU32_TOBAC;tr|A0A1S4DEU7|A0A1S4DEU7_TOBAC	tr|A0A1S3XU32|A0A1S3XU32_TOBAC BAG family molecular chaperone regulator 7-like OS=Nicotiana tabacum OX=4097 GN=LOC107768598 PE=4 SV=1;tr|A0A1S4DEU7|A0A1S4DEU7_TOBAC BAG family molecular chaperone regulator 7-like OS=Nicotiana tabacum OX=4097 GN=LOC10782898	1	1	1	3.2	3.2	3.2	6.2767	64350000	58553000	33650000	17762000	107630000	217650000	85575000	33849000	201390000	91018000	441060000	35717000	0	0	0	0	0	0	0	0	0	0	0	0	8
tr|A0A1S3XU44|A0A1S3XU44_TOBAC;tr|A0A1S3XU57|A0A1S3XU57_TOBAC	tr|A0A1S3XU44|A0A1S3XU44_TOBAC Carbonic anhydrase OS=Nicotiana tabacum OX=4097 GN=LOC107768773 PE=3 SV=1;tr|A0A1S3XU57|A0A1S3XU57_TOBAC Carbonic anhydrase OS=Nicotiana tabacum OX=4097 GN=LOC107768773 PE=3 SV=1	13	13	2	57.7	57.7	10.8	323.31	27801000000	27712000000	13828000000	14167000000	19566000000	25013000000	11403000000	9617200000	24128000000	24190000000	34522000000	12105000000	7226000000	3873200000	5161000000	5599900000	3595900000	3804800000	3228000000	4560700000	4090500000	4160200000	4726800000	4218300000	268
tr|A0A1S3XU77|A0A1S3XU77_TOBAC;tr|A0A1S3ZUI8|A0A1S3ZUI8_TOBAC;tr|A0A1S4BZY8|A0A1S4BZY8_TOBAC;tr|Q14TB1|Q14TB1_TOBAC;tr|E9NZ46|E9NZ46_TOBAC;tr|Q6R0J1|Q6R0J1_TOBAC	tr|A0A1S3XU77|A0A1S3XU77_TOBAC heat shock cognate protein 80-like OS=Nicotiana tabacum OX=4097 GN=LOC107768797 PE=3 SV=1;tr|A0A1S3ZUI8|A0A1S3ZUI8_TOBAC heat shock cognate protein 80-like OS=Nicotiana tabacum OX=4097 GN=LOC107790625 PE=3 SV=1;tr|A0A1S4BZY8|	29	29	2	43.9	43.9	6.9	323.31	3291900000	8297500000	2307600000	1596500000	5720800000	11496000000	4595400000	2685200000	9220300000	13942000000	12552000000	4710500000	655490000	784680000	702630000	558380000	691240000	857760000	847230000	825380000	1088100000	1223000000	898040000	1283600000	373
tr|A0A1S4DCB9|A0A1S4DCB9_TOBAC;tr|A0A1S4AMT9|A0A1S4AMT9_TOBAC;tr|A0A1S4AHL7|A0A1S4AHL7_TOBAC;tr|A0A1S3XU79|A0A1S3XU79_TOBAC	tr|A0A1S4DCB9|A0A1S4DCB9_TOBAC 60S ribosomal protein L35a-3-like OS=Nicotiana tabacum OX=4097 GN=LOC107828320 PE=3 SV=1;tr|A0A1S4AMT9|A0A1S4AMT9_TOBAC 60S ribosomal protein L35a-3-like OS=Nicotiana tabacum OX=4097 GN=LOC107799355 PE=3 SV=1;tr|A0A1S4AHL7|A0	4	4	4	31.2	31.2	31.2	56.778	983650000	2107000000	627060000	690510000	2004000000	3026700000	1697700000	690200000	1931400000	2395700000	2523700000	652530000	582330000	502080000	523590000	598300000	690410000	731270000	903450000	752050000	544260000	623930000	581930000	472160000	53
tr|A0A1S4CZJ5|A0A1S4CZJ5_TOBAC;tr|A0A1S4CZF0|A0A1S4CZF0_TOBAC;tr|A0A1S3XUC9|A0A1S3XUC9_TOBAC	tr|A0A1S4CZJ5|A0A1S4CZJ5_TOBAC copper transport protein ATX1-like isoform X2 OS=Nicotiana tabacum OX=4097 GN=LOC107824312 PE=4 SV=1;tr|A0A1S4CZF0|A0A1S4CZF0_TOBAC copper transport protein ATX1-like isoform X1 OS=Nicotiana tabacum OX=4097 GN=LOC107824312 PE	1	1	1	18.4	18.4	18.4	4.0969	100360000	265410000	66900000	70948000	120710000	132020000	51313000	45891000	147860000	211270000	302270000	55848000	0	0	0	0	0	0	0	0	0	0	0	0	3
tr|A0A1S4BKG8|A0A1S4BKG8_TOBAC;tr|A0A1S3ZKB1|A0A1S3ZKB1_TOBAC;tr|A0A1S3XUE9|A0A1S3XUE9_TOBAC	tr|A0A1S4BKG8|A0A1S4BKG8_TOBAC uncharacterized protein LOC107809238 OS=Nicotiana tabacum OX=4097 GN=LOC107809238 PE=4 SV=1;tr|A0A1S3ZKB1|A0A1S3ZKB1_TOBAC Na(+)/H(+) antiporter NhaD-like OS=Nicotiana tabacum OX=4097 GN=LOC107787869 PE=3 SV=1;tr|A0A1S3XUE9|A	1	1	1	3.6	3.6	3.6	2.909	7189300	0	7009400	0	0	39267000	20284000	6124600	21596000	24943000	32384000	0	0	0	0	0	0	0	0	0	0	0	0	0	4
tr|A0A1S4C7R4|A0A1S4C7R4_TOBAC;tr|A0A1S3XUI8|A0A1S3XUI8_TOBAC;sp|P50218|IDHC_TOBAC	tr|A0A1S4C7R4|A0A1S4C7R4_TOBAC Isocitrate dehydrogenase [NADP] OS=Nicotiana tabacum OX=4097 GN=LOC107815853 PE=3 SV=1;tr|A0A1S3XUI8|A0A1S3XUI8_TOBAC Isocitrate dehydrogenase [NADP] OS=Nicotiana tabacum OX=4097 GN=LOC107768947 PE=3 SV=1;sp|P50218|IDHC_TOBAC	9	9	7	25.3	25.3	20.5	43.421	218410000	558800000	87957000	194800000	594930000	1112000000	371020000	236350000	1481300000	1536900000	1132300000	467090000	109930000	116850000	110130000	130280000	151170000	232180000	142660000	168020000	368860000	333180000	305760000	229300000	47
tr|A0A1S3Y054|A0A1S3Y054_TOBAC;tr|A0A1S4ACX7|A0A1S4ACX7_TOBAC;tr|A0A1S4ACZ0|A0A1S4ACZ0_TOBAC;tr|A0A1S3XUK9|A0A1S3XUK9_TOBAC	tr|A0A1S3Y054|A0A1S3Y054_TOBAC mitochondrial import inner membrane translocase subunit TIM17-2-like OS=Nicotiana tabacum OX=4097 GN=LOC107770629 PE=4 SV=1;tr|A0A1S4ACX7|A0A1S4ACX7_TOBAC mitochondrial import inner membrane translocase subunit TIM17-2-like O	1	1	1	9.6	9.6	9.6	3.1981	15861000	0	3652000	1847200	3098200	13981000	5253500	7876300	0	0	0	6681900	0	0	0	0	0	0	0	0	0	0	0	0	3
tr|A0A1S4DJH3|A0A1S4DJH3_TOBAC;tr|A0A1S3ZTH3|A0A1S3ZTH3_TOBAC;tr|A0A1S3Y379|A0A1S3Y379_TOBAC;tr|A0A1S3XUR0|A0A1S3XUR0_TOBAC;tr|A0A1S3Z846|A0A1S3Z846_TOBAC;tr|A0A1S3XIZ8|A0A1S3XIZ8_TOBAC	tr|A0A1S4DJH3|A0A1S4DJH3_TOBAC Ribosomal protein OS=Nicotiana tabacum OX=4097 GN=LOC107830403 PE=3 SV=1;tr|A0A1S3ZTH3|A0A1S3ZTH3_TOBAC Ribosomal protein OS=Nicotiana tabacum OX=4097 GN=LOC107790274 PE=3 SV=1;tr|A0A1S3Y379|A0A1S3Y379_TOBAC Ribosomal protein	8	8	8	38.9	38.9	38.9	197.38	1508100000	4383000000	1099400000	1108500000	2793100000	3943300000	1957400000	771320000	1903000000	2597100000	2681300000	663930000	342330000	439590000	423040000	441330000	399050000	480800000	484070000	294140000	298160000	320140000	302080000	273990000	123
tr|A0A1S3XUS2|A0A1S3XUS2_TOBAC	tr|A0A1S3XUS2|A0A1S3XUS2_TOBAC folate synthesis bifunctional protein, mitochondrial-like OS=Nicotiana tabacum OX=4097 GN=LOC107768956 PE=3 SV=1	2	2	2	6.9	6.9	6.9	6.9708	10479000	128090000	154880000	119280000	212030000	216030000	163640000	47790000	283020000	188120000	244210000	113100000	0	0	0	127280000	141820000	137060000	110720000	0	137390000	137070000	128940000	137820000	7
tr|A0A1S3XUV5|A0A1S3XUV5_TOBAC	tr|A0A1S3XUV5|A0A1S3XUV5_TOBAC endoplasmin homolog OS=Nicotiana tabacum OX=4097 GN=LOC107769069 PE=3 SV=1	9	1	1	13.1	2.1	2.1	4.2663	12975000	75862000	18949000	0	0	47775000	8269900	6149800	111430000	43802000	139340000	18060000	0	0	0	0	0	0	0	0	0	0	0	0	1
tr|A0A1S4CNH5|A0A1S4CNH5_TOBAC;tr|A0A1S3XVF1|A0A1S3XVF1_TOBAC	tr|A0A1S4CNH5|A0A1S4CNH5_TOBAC uncharacterized protein LOC107820786 OS=Nicotiana tabacum OX=4097 GN=LOC107820786 PE=4 SV=1;tr|A0A1S3XVF1|A0A1S3XVF1_TOBAC uncharacterized protein LOC107769179 OS=Nicotiana tabacum OX=4097 GN=LOC107769179 PE=4 SV=1	1	1	1	5.6	5.6	5.6	2.7564	20237000	28520000	15032000	14930000	27845000	102600000	15309000	5070200	32054000	26007000	25789000	5979200	0	0	0	0	0	0	0	0	0	0	0	0	2
tr|A0A1S3XVH1|A0A1S3XVH1_TOBAC;tr|A0A1S4C5Z3|A0A1S4C5Z3_TOBAC	tr|A0A1S3XVH1|A0A1S3XVH1_TOBAC Ribonuclease OS=Nicotiana tabacum OX=4097 GN=LOC107769187 PE=4 SV=1;tr|A0A1S4C5Z3|A0A1S4C5Z3_TOBAC Ribonuclease OS=Nicotiana tabacum OX=4097 GN=LOC107815454 PE=4 SV=1	8	8	8	10.3	10.3	10.3	54.599	282650000	530550000	96099000	63537000	274130000	316190000	160480000	122190000	501920000	421880000	369090000	153750000	119290000	116570000	58135000	57004000	42578000	63123000	52835000	67193000	81698000	50530000	67431000	88859000	30
tr|Q5DJV4|Q5DJV4_TOBAC;tr|A0A1S4DKB5|A0A1S4DKB5_TOBAC;tr|A0A1S3XVS4|A0A1S3XVS4_TOBAC;tr|A0A1S4CWV6|A0A1S4CWV6_TOBAC;tr|A0A1S4APS1|A0A1S4APS1_TOBAC	tr|Q5DJV4|Q5DJV4_TOBAC Fas-associated factor-like protein (Fragment) OS=Nicotiana tabacum OX=4097 PE=2 SV=1;tr|A0A1S4DKB5|A0A1S4DKB5_TOBAC plant UBX domain-containing protein 10-like OS=Nicotiana tabacum OX=4097 GN=LOC107830718 PE=4 SV=1;tr|A0A1S3XVS4|A0A1	2	2	2	9.1	9.1	9.1	14.053	124940000	231610000	53205000	49685000	197320000	283550000	87395000	10835000	189480000	173590000	173360000	57432000	69078000	91366000	64213000	62465000	73994000	84283000	63755000	0	68843000	66736000	65555000	67120000	7
tr|A0A1S3XVT6|A0A1S3XVT6_TOBAC;tr|A0A140G1U7|A0A140G1U7_TOBAC;sp|P06247|CYB6_TOBAC	tr|A0A1S3XVT6|A0A1S3XVT6_TOBAC cytochrome b6 OS=Nicotiana tabacum OX=4097 GN=LOC107769160 PE=3 SV=1;tr|A0A140G1U7|A0A140G1U7_TOBAC Cytochrome b6 OS=Nicotiana tabacum OX=4097 GN=petB PE=3 SV=1;sp|P06247|CYB6_TOBAC Cytochrome b6 OS=Nicotiana tabacum OX=4097	5	5	5	19.9	19.9	19.9	83.188	4682800000	13836000000	2318700000	2534400000	3815200000	28252000000	4632400000	3041900000	11785000000	20262000000	22569000000	3125500000	2121800000	3585800000	1932400000	2271800000	1122400000	4199100000	1828400000	2481500000	3858700000	4188900000	4945600000	2420900000	90
tr|A0A1S4B5Q0|A0A1S4B5Q0_TOBAC;tr|A0A1S3XW04|A0A1S3XW04_TOBAC	tr|A0A1S4B5Q0|A0A1S4B5Q0_TOBAC uncharacterized protein LOC107804776 OS=Nicotiana tabacum OX=4097 GN=LOC107804776 PE=4 SV=1;tr|A0A1S3XW04|A0A1S3XW04_TOBAC uncharacterized protein LOC107769423 OS=Nicotiana tabacum OX=4097 GN=LOC107769423 PE=4 SV=1	1	1	1	5.8	5.8	5.8	28.097	295920000	230840000	230120000	194430000	189590000	122100000	131110000	192250000	224230000	108640000	234500000	152930000	216910000	90340000	296860000	251360000	93072000	46582000	101780000	300030000	114250000	44973000	95946000	176130000	26
tr|A0A1S4ATN8|A0A1S4ATN8_TOBAC;tr|A0A1S3XW41|A0A1S3XW41_TOBAC	tr|A0A1S4ATN8|A0A1S4ATN8_TOBAC CCT-eta OS=Nicotiana tabacum OX=4097 GN=LOC107801176 PE=3 SV=1;tr|A0A1S3XW41|A0A1S3XW41_TOBAC CCT-eta OS=Nicotiana tabacum OX=4097 GN=LOC107769239 PE=3 SV=1	1	1	1	2.5	2.5	2.5	4.4112	74945000	63182000	0	36632000	60704000	56103000	0	19585000	0	0	37534000	0	0	0	0	0	0	0	0	0	0	0	0	0	1
tr|A0A1S3XWB1|A0A1S3XWB1_TOBAC;tr|A0A1S4DR92|A0A1S4DR92_TOBAC	tr|A0A1S3XWB1|A0A1S3XWB1_TOBAC tryptophan--tRNA ligase OS=Nicotiana tabacum OX=4097 GN=LOC107769302 PE=3 SV=1;tr|A0A1S4DR92|A0A1S4DR92_TOBAC tryptophan--tRNA ligase OS=Nicotiana tabacum OX=4097 GN=LOC107832588 PE=3 SV=1	4	4	1	10.7	10.7	4.2	21.037	195050000	169580000	123670000	121110000	200350000	331320000	191430000	110500000	261340000	199130000	207530000	50095000	123900000	0	149540000	116460000	78544000	83674000	112930000	123800000	69074000	56312000	64863000	51780000	14
tr|A0A1S4A637|A0A1S4A637_TOBAC;tr|A0A1S3XWU4|A0A1S3XWU4_TOBAC	tr|A0A1S4A637|A0A1S4A637_TOBAC uncharacterized protein LOC107794167 OS=Nicotiana tabacum OX=4097 GN=LOC107794167 PE=4 SV=1;tr|A0A1S3XWU4|A0A1S3XWU4_TOBAC uncharacterized protein LOC107769471 OS=Nicotiana tabacum OX=4097 GN=LOC107769471 PE=4 SV=1	6	6	6	19	19	19	46.423	809780000	1708100000	521600000	440740000	796710000	627330000	222600000	486390000	1108500000	1124100000	1029300000	622510000	241320000	273110000	262350000	237170000	157420000	134800000	141360000	197930000	172760000	174410000	202350000	223720000	56
tr|Q04126|Q04126_TOBAC;tr|A0A1S3XWU9|A0A1S3XWU9_TOBAC;tr|Q40457|Q40457_TOBAC;tr|A0A1S3ZDX5|A0A1S3ZDX5_TOBAC;sp|Q7DM39|PSBP1_TOBAC	tr|Q04126|Q04126_TOBAC 23 kDa subunit of oxygen evolving system of photosystem II OS=Nicotiana tabacum OX=4097 GN=oee2-B PE=2 SV=1;tr|A0A1S3XWU9|A0A1S3XWU9_TOBAC 23 kDa subunit of oxygen evolving system of photosystem II OS=Nicotiana tabacum OX=4097 GN=LOC	8	8	8	46.6	46.6	46.6	180.26	1290500000	2055900000	904840000	885140000	1424400000	2760100000	1330300000	2053000000	2638300000	3205500000	3075600000	1841000000	783490000	727580000	744020000	843350000	780500000	1096900000	815380000	1392800000	1120000000	1068000000	1006200000	1120500000	65
tr|A0A1S3XWV1|A0A1S3XWV1_TOBAC;tr|A0A1S4C9X8|A0A1S4C9X8_TOBAC	tr|A0A1S3XWV1|A0A1S3XWV1_TOBAC pentatricopeptide repeat-containing protein At1g60770-like OS=Nicotiana tabacum OX=4097 GN=LOC107769695 PE=4 SV=1;tr|A0A1S4C9X8|A0A1S4C9X8_TOBAC pentatricopeptide repeat-containing protein At1g60770-like OS=Nicotiana tabacum	3	3	3	9.1	9.1	9.1	11.428	123250000	135420000	107460000	155680000	121080000	82183000	96944000	72950000	90208000	139090000	146670000	124320000	0	0	0	96658000	0	74085000	0	0	0	67531000	63384000	0	6
tr|A0A1S3XWY6|A0A1S3XWY6_TOBAC;tr|A0A1S4BQS3|A0A1S4BQS3_TOBAC;tr|A0A1S3XV62|A0A1S3XV62_TOBAC;tr|A0A1S3XUG0|A0A1S3XUG0_TOBAC	tr|A0A1S3XWY6|A0A1S3XWY6_TOBAC PSI subunit V OS=Nicotiana tabacum OX=4097 GN=LOC107769513 PE=3 SV=1;tr|A0A1S4BQS3|A0A1S4BQS3_TOBAC PSI subunit V OS=Nicotiana tabacum OX=4097 GN=LOC107810830 PE=3 SV=1;tr|A0A1S3XV62|A0A1S3XV62_TOBAC PSI subunit V OS=Nicotian	6	6	6	25.5	25.5	25.5	69.08	1950800000	3801800000	1172300000	1200900000	1314300000	3235000000	1465200000	1342900000	4975200000	5627200000	5734000000	1319000000	775960000	828780000	516160000	710250000	386300000	685920000	477790000	858980000	1158500000	1235500000	1071200000	726490000	101
tr|A0A1S3Y6H3|A0A1S3Y6H3_TOBAC;tr|A0A1S3XX03|A0A1S3XX03_TOBAC;tr|A0A1S3ZIC0|A0A1S3ZIC0_TOBAC	tr|A0A1S3Y6H3|A0A1S3Y6H3_TOBAC 31 kDa ribonucleoprotein, chloroplastic-like OS=Nicotiana tabacum OX=4097 GN=LOC107772527 PE=4 SV=1;tr|A0A1S3XX03|A0A1S3XX03_TOBAC 31 kDa ribonucleoprotein, chloroplastic OS=Nicotiana tabacum OX=4097 GN=LOC107769683 PE=4 SV=1	1	1	1	10.6	10.6	10.6	20.407	90413000	232460000	68924000	64491000	131950000	184770000	175440000	70435000	218060000	222260000	335730000	71539000	0	0	0	0	0	0	0	0	0	0	0	0	12
tr|A0A1S4CY86|A0A1S4CY86_TOBAC;tr|A0A1S3XXF1|A0A1S3XXF1_TOBAC;tr|A0A1S3XXF4|A0A1S3XXF4_TOBAC	tr|A0A1S4CY86|A0A1S4CY86_TOBAC probable glutamyl endopeptidase, chloroplastic OS=Nicotiana tabacum OX=4097 GN=LOC107823911 PE=4 SV=1;tr|A0A1S3XXF1|A0A1S3XXF1_TOBAC probable glutamyl endopeptidase, chloroplastic isoform X2 OS=Nicotiana tabacum OX=4097 GN=LO	1	1	1	2.2	2.2	2.2	8.8707	10953000	13349000	7292100	8106300	10794000	11425000	13091000	14899000	41062000	0	22089000	20173000	0	0	0	0	0	0	0	0	0	0	0	0	5
tr|A0A1S3YDV1|A0A1S3YDV1_TOBAC;tr|A0A1S3XXF3|A0A1S3XXF3_TOBAC	tr|A0A1S3YDV1|A0A1S3YDV1_TOBAC Pre-mRNA-processing factor 19 OS=Nicotiana tabacum OX=4097 GN=LOC107775142 PE=3 SV=1;tr|A0A1S3XXF3|A0A1S3XXF3_TOBAC Pre-mRNA-processing factor 19 OS=Nicotiana tabacum OX=4097 GN=LOC107769884 PE=3 SV=1	2	2	2	7.3	7.3	7.3	68.418	46108000	583400000	67447000	58126000	116110000	111100000	160350000	25086000	127270000	143770000	285390000	67378000	0	173540000	0	0	0	0	0	0	0	0	87068000	0	3
tr|A0A1S4AUY8|A0A1S4AUY8_TOBAC;tr|A0A1S3XXK7|A0A1S3XXK7_TOBAC	tr|A0A1S4AUY8|A0A1S4AUY8_TOBAC 7-dehydrocholesterol reductase-like OS=Nicotiana tabacum OX=4097 GN=LOC107801501 PE=3 SV=1;tr|A0A1S3XXK7|A0A1S3XXK7_TOBAC 7-dehydrocholesterol reductase-like OS=Nicotiana tabacum OX=4097 GN=LOC107769866 PE=3 SV=1	2	2	2	6.2	6.2	6.2	10.481	24318000	217560000	168830000	143300000	347440000	149430000	20345000	105560000	53960000	60480000	66986000	362040	0	148280000	192550000	120920000	230120000	93035000	0	153990000	0	0	0	0	7
tr|A0A1S4CWY3|A0A1S4CWY3_TOBAC;tr|A0A1S3XXK8|A0A1S3XXK8_TOBAC;tr|A0A1S3XY80|A0A1S3XY80_TOBAC	tr|A0A1S4CWY3|A0A1S4CWY3_TOBAC ATP-dependent RNA helicase-like protein DB10 OS=Nicotiana tabacum OX=4097 GN=LOC107823507 PE=3 SV=1;tr|A0A1S3XXK8|A0A1S3XXK8_TOBAC ATP-dependent RNA helicase-like protein DB10 isoform X2 OS=Nicotiana tabacum OX=4097 GN=LOC107	3	2	2	6.9	4.7	4.7	4.2088	0	13203000	346640	0	14039000	0	5373500	0	7291100	0	0	0	0	0	0	0	0	0	0	0	0	0	0	0	2
tr|A0A1S4BEY9|A0A1S4BEY9_TOBAC;tr|A0A1S3XXL6|A0A1S3XXL6_TOBAC;tr|A0A1S4ARD7|A0A1S4ARD7_TOBAC;tr|A0A1S3YCJ0|A0A1S3YCJ0_TOBAC;tr|A0A1S4AS66|A0A1S4AS66_TOBAC;tr|A0A1S3ZW20|A0A1S3ZW20_TOBAC;tr|A0A1S3XTF0|A0A1S3XTF0_TOBAC;tr|A0A1S3YIT9|A0A1S3YIT9_TOBAC;tr|A0A1S4ASD1|A0A1S4ASD1_TOBAC	tr|A0A1S4BEY9|A0A1S4BEY9_TOBAC Histone H2A OS=Nicotiana tabacum OX=4097 GN=LOC107807559 PE=3 SV=1;tr|A0A1S3XXL6|A0A1S3XXL6_TOBAC Histone H2A OS=Nicotiana tabacum OX=4097 GN=LOC107769946 PE=3 SV=1;tr|A0A1S4ARD7|A0A1S4ARD7_TOBAC Histone H2A OS=Nicotiana taba	3	1	1	31.7	20.4	20.4	7.2506	5546900	0	0	0	0	0	0	22163000	0	0	37408000	0	0	0	0	0	0	0	0	0	0	0	0	0	2
tr|A0A1S3XXN1|A0A1S3XXN1_TOBAC;tr|A0A1S3YF23|A0A1S3YF23_TOBAC	tr|A0A1S3XXN1|A0A1S3XXN1_TOBAC putative disease resistance protein RGA3 OS=Nicotiana tabacum OX=4097 GN=LOC107769889 PE=4 SV=1;tr|A0A1S3YF23|A0A1S3YF23_TOBAC putative disease resistance protein RGA3 OS=Nicotiana tabacum OX=4097 GN=LOC107775388 PE=4 SV=1	1	1	1	1.2	1.2	1.2	4.3136	17299000	10935000	9624100	7808700	10141000	17743000	9708000	25820000	13490000	19330000	23695000	16256000	0	0	0	0	0	0	0	0	0	0	0	0	12
tr|A0A1S3XXN7|A0A1S3XXN7_TOBAC	tr|A0A1S3XXN7|A0A1S3XXN7_TOBAC glutamate-1-semialdehyde 2,1-aminomutase OS=Nicotiana tabacum OX=4097 GN=LOC107769957 PE=3 SV=1	7	2	2	41.1	16.2	16.2	31.504	367880000	403250000	48487000	312290000	366380000	457500000	189620000	210320000	447830000	241820000	424810000	230170000	273650000	186520000	0	311020000	169760000	158580000	0	0	212410000	161810000	188970000	273140000	10
tr|A0A1S3XXQ5|A0A1S3XXQ5_TOBAC	tr|A0A1S3XXQ5|A0A1S3XXQ5_TOBAC 60S ribosomal protein L8-like OS=Nicotiana tabacum OX=4097 GN=LOC107769978 PE=3 SV=1	6	2	2	36.2	9.2	9.2	9.857	668660000	1499700000	424860000	393760000	1208000000	1762000000	724360000	126600000	835760000	1200800000	1374700000	247520000	359570000	394140000	347130000	350160000	413570000	481630000	348510000	113090000	272820000	351270000	366770000	198370000	26
tr|A0A1S3XXV4|A0A1S3XXV4_TOBAC;tr|A0A1S4A2J7|A0A1S4A2J7_TOBAC;tr|A0A1S3ZZK9|A0A1S3ZZK9_TOBAC;tr|A0A1S3YH06|A0A1S3YH06_TOBAC;tr|A0A1S3XY12|A0A1S3XY12_TOBAC	tr|A0A1S3XXV4|A0A1S3XXV4_TOBAC leucine-rich repeat extensin-like protein 1 isoform X2 OS=Nicotiana tabacum OX=4097 GN=LOC107770037 PE=4 SV=1;tr|A0A1S4A2J7|A0A1S4A2J7_TOBAC C2 domain-containing protein At1g63220-like OS=Nicotiana tabacum OX=4097 GN=LOC10779	1	1	1	4.7	4.7	4.7	3.026	38185000	46114000	22201000	21205000	44789000	48400000	28302000	20162000	49964000	45898000	46369000	21813000	0	0	0	0	0	0	0	0	0	0	0	0	3
tr|A0A1S4CQZ0|A0A1S4CQZ0_TOBAC;tr|A0A1S3XXX9|A0A1S3XXX9_TOBAC	tr|A0A1S4CQZ0|A0A1S4CQZ0_TOBAC heat shock protein 90-6, mitochondrial-like OS=Nicotiana tabacum OX=4097 GN=LOC107821521 PE=3 SV=1;tr|A0A1S3XXX9|A0A1S3XXX9_TOBAC heat shock protein 90-6, mitochondrial-like OS=Nicotiana tabacum OX=4097 GN=LOC107769814 PE=3 S	2	1	1	4.3	2.5	2.5	17.604	15060000	25511000	8405400	0	0	24083000	8853500	17340000	32009000	0	34118000	0	0	0	0	0	0	0	0	0	0	0	0	0	3
tr|A0A1S3XXZ8|A0A1S3XXZ8_TOBAC;tr|A0A1S3Y3W2|A0A1S3Y3W2_TOBAC	tr|A0A1S3XXZ8|A0A1S3XXZ8_TOBAC mannose-1-phosphate guanylyltransferase OS=Nicotiana tabacum OX=4097 GN=LOC107770019 PE=3 SV=1;tr|A0A1S3Y3W2|A0A1S3Y3W2_TOBAC mannose-1-phosphate guanylyltransferase OS=Nicotiana tabacum OX=4097 GN=LOC107771893 PE=3 SV=1	10	10	3	42.9	42.9	15.2	156.59	1872900000	2396300000	1223300000	1017600000	2147600000	1796700000	1023100000	688080000	1387500000	1832900000	1577800000	901200000	551910000	414840000	597310000	571910000	488690000	325310000	356270000	372630000	352970000	413690000	345020000	528350000	85
tr|A0A1S3XY11|A0A1S3XY11_TOBAC	tr|A0A1S3XY11|A0A1S3XY11_TOBAC pentatricopeptide repeat-containing protein At1g31430-like OS=Nicotiana tabacum OX=4097 GN=LOC107769862 PE=4 SV=1	1	1	1	3.5	3.5	3.5	-2	0	103380000	0	11179000	0	0	110670000	0	91008000	0	0	0	0	0	0	0	0	0	0	0	0	0	0	0	1
tr|A0A1S4D2P7|A0A1S4D2P7_TOBAC;tr|A0A1S3XY51|A0A1S3XY51_TOBAC	tr|A0A1S4D2P7|A0A1S4D2P7_TOBAC chaperonin CPN60-2, mitochondrial-like OS=Nicotiana tabacum OX=4097 GN=LOC107825374 PE=3 SV=1;tr|A0A1S3XY51|A0A1S3XY51_TOBAC chaperonin CPN60-2, mitochondrial OS=Nicotiana tabacum OX=4097 GN=LOC107770118 PE=3 SV=1	5	1	1	13.7	4.9	4.9	3.0386	0	0	0	0	54838000	0	0	48907000	68009000	0	0	0	0	0	0	0	0	0	0	0	0	0	0	0	0
tr|A0A1S3XYE9|A0A1S3XYE9_TOBAC;tr|A0A1S3XYJ3|A0A1S3XYJ3_TOBAC;tr|A0A1S4DL85|A0A1S4DL85_TOBAC	tr|A0A1S3XYE9|A0A1S3XYE9_TOBAC tryptophan--tRNA ligase OS=Nicotiana tabacum OX=4097 GN=LOC107770201 PE=3 SV=1;tr|A0A1S3XYJ3|A0A1S3XYJ3_TOBAC tryptophan--tRNA ligase OS=Nicotiana tabacum OX=4097 GN=LOC107770201 PE=3 SV=1;tr|A0A1S4DL85|A0A1S4DL85_TOBAC trypt	4	1	1	14.5	4.3	4.3	3.1285	168330000	0	0	41764000	0	0	0	0	0	0	0	0	0	0	0	0	0	0	0	0	0	0	0	0	1
tr|A0A1S4CXV7|A0A1S4CXV7_TOBAC;tr|A0A1S4ALK0|A0A1S4ALK0_TOBAC;tr|A0A1S3XYF7|A0A1S3XYF7_TOBAC;tr|A0A1S3ZF94|A0A1S3ZF94_TOBAC;tr|A0A1S4A1G4|A0A1S4A1G4_TOBAC;tr|A0A1S4BNF4|A0A1S4BNF4_TOBAC	tr|A0A1S4CXV7|A0A1S4CXV7_TOBAC ATP-dependent zinc metalloprotease FTSH 8, mitochondrial-like OS=Nicotiana tabacum OX=4097 GN=LOC107823778 PE=3 SV=1;tr|A0A1S4ALK0|A0A1S4ALK0_TOBAC ATP-dependent zinc metalloprotease FTSH 10, mitochondrial-like OS=Nicotiana t	2	2	2	3.4	3.4	3.4	3.4057	0	25428000	4987800	16959000	0	382820000	6159900	0	15235000	9382200	0	3477600	0	0	0	0	0	0	0	0	0	0	0	0	1
tr|A0A1S3XYH7|A0A1S3XYH7_TOBAC	tr|A0A1S3XYH7|A0A1S3XYH7_TOBAC cytochrome c1-2, heme protein, mitochondrial OS=Nicotiana tabacum OX=4097 GN=LOC107770145 PE=4 SV=1	1	1	1	5.2	5.2	5.2	3.0469	0	0	0	0	0	0	0	0	0	0	0	0	0	0	0	0	0	0	0	0	0	0	0	0	1
tr|A0A1S3XYH8|A0A1S3XYH8_TOBAC	tr|A0A1S3XYH8|A0A1S3XYH8_TOBAC 60S ribosomal protein L30 OS=Nicotiana tabacum OX=4097 GN=LOC107770030 PE=3 SV=1	4	4	1	35.7	35.7	10.7	25.346	1084500000	2157400000	637820000	297930000	2125100000	3618800000	1430900000	556810000	1430100000	2079400000	2089500000	497800000	759170000	749450000	747220000	1001100000	940760000	1016300000	869190000	748330000	594330000	678950000	696490000	708730000	35
tr|A0A1S3YSD8|A0A1S3YSD8_TOBAC;tr|A0A1S3XYU0|A0A1S3XYU0_TOBAC	tr|A0A1S3YSD8|A0A1S3YSD8_TOBAC eukaryotic initiation factor 4A-3-like OS=Nicotiana tabacum OX=4097 GN=LOC107779209 PE=4 SV=1;tr|A0A1S3XYU0|A0A1S3XYU0_TOBAC eukaryotic initiation factor 4A-3 OS=Nicotiana tabacum OX=4097 GN=LOC107770285 PE=4 SV=1	4	3	3	17.4	14.9	14.9	10.821	127970000	147000000	155970000	112060000	93879000	119130000	83672000	80398000	133090000	78295000	160780000	115190000	121850000	70086000	217620000	114260000	54794000	55478000	76853000	108560000	79106000	54053000	74551000	138450000	29
tr|A0A1S3XZ10|A0A1S3XZ10_TOBAC;tr|A0A1S3Y7A9|A0A1S3Y7A9_TOBAC;tr|A0A1S3Y7Y9|A0A1S3Y7Y9_TOBAC;tr|A0A1S4AR36|A0A1S4AR36_TOBAC;tr|A0A1S3YUY2|A0A1S3YUY2_TOBAC;tr|A0A1S3Y7T9|A0A1S3Y7T9_TOBAC;tr|A0A1S3Y7C6|A0A1S3Y7C6_TOBAC;tr|A0A1S3Y751|A0A1S3Y751_TOBAC	tr|A0A1S3XZ10|A0A1S3XZ10_TOBAC Phenylalanyl-tRNA synthetase beta subunit OS=Nicotiana tabacum OX=4097 GN=LOC107770299 PE=4 SV=1;tr|A0A1S3Y7A9|A0A1S3Y7A9_TOBAC phenylalanine--tRNA ligase OS=Nicotiana tabacum OX=4097 GN=LOC107773132 PE=3 SV=1;tr|A0A1S3Y7Y9|A	1	1	1	3.5	3.5	3.5	-2	344150000	370620000	189260000	259660000	646000000	403380000	250210000	133890000	554830000	450580000	412030000	311650000	0	0	0	0	0	0	0	0	0	0	0	0	1
tr|A0A1S3XZ18|A0A1S3XZ18_TOBAC;tr|A0A1S3Z1R7|A0A1S3Z1R7_TOBAC	tr|A0A1S3XZ18|A0A1S3XZ18_TOBAC pentatricopeptide repeat-containing protein At2g37230-like OS=Nicotiana tabacum OX=4097 GN=LOC107770362 PE=4 SV=1;tr|A0A1S3Z1R7|A0A1S3Z1R7_TOBAC pentatricopeptide repeat-containing protein At2g37230-like OS=Nicotiana tabacum	4	4	4	7.3	7.3	7.3	26.437	31632000	327130000	93755000	74218000	189580000	213130000	149410000	27039000	39553000	156560000	261620000	65869000	0	63406000	55108000	56222000	71691000	63343000	66452000	42937000	0	47856000	61405000	63526000	10
tr|A0A1S3XZ80|A0A1S3XZ80_TOBAC;tr|A0A1S3Z1N7|A0A1S3Z1N7_TOBAC	tr|A0A1S3XZ80|A0A1S3XZ80_TOBAC acetolactate synthase small subunit 1, chloroplastic-like OS=Nicotiana tabacum OX=4097 GN=LOC107770361 PE=3 SV=1;tr|A0A1S3Z1N7|A0A1S3Z1N7_TOBAC acetolactate synthase small subunit 1, chloroplastic-like OS=Nicotiana tabacum OX	4	4	3	10.6	10.6	7.9	8.9849	39372000	74314000	31198000	13598000	29689000	50425000	30991000	27581000	44620000	68442000	20109000	22917000	21589000	0	0	0	0	14838000	19418000	0	0	0	0	0	8
tr|A0A1S4AQY8|A0A1S4AQY8_TOBAC;tr|H2ESL0|H2ESL0_TOBAC;tr|A0A1S4CVM4|A0A1S4CVM4_TOBAC;tr|A0A1S3XZD9|A0A1S3XZD9_TOBAC	tr|A0A1S4AQY8|A0A1S4AQY8_TOBAC pathogenesis-related protein STH-2-like OS=Nicotiana tabacum OX=4097 GN=LOC107800446 PE=3 SV=1;tr|H2ESL0|H2ESL0_TOBAC Pathogenesis-related protein PR10 OS=Nicotiana tabacum OX=4097 GN=pr10 PE=2 SV=1;tr|A0A1S4CVM4|A0A1S4CVM4_T	1	1	1	20.8	20.8	20.8	6.0914	50218000	78930000	11233000	0	0	118510000	60113000	21527000	110620000	77488000	78958000	50618000	0	0	0	0	0	0	0	0	0	0	0	0	3
tr|A0A1S4DB07|A0A1S4DB07_TOBAC;tr|A0A1S3ZWP0|A0A1S3ZWP0_TOBAC;tr|A0A1S3XZG8|A0A1S3XZG8_TOBAC;tr|A0A1S4BDW5|A0A1S4BDW5_TOBAC;tr|A0A1S4BKX0|A0A1S4BKX0_TOBAC;tr|A0A1S3XYB6|A0A1S3XYB6_TOBAC	tr|A0A1S4DB07|A0A1S4DB07_TOBAC 26S protease regulatory subunit 6B homolog OS=Nicotiana tabacum OX=4097 GN=LOC107827877 PE=3 SV=1;tr|A0A1S3ZWP0|A0A1S3ZWP0_TOBAC 26S protease regulatory subunit 6B homolog OS=Nicotiana tabacum OX=4097 GN=LOC107791257 PE=3 SV=	6	6	6	21.5	21.5	21.5	52.629	270980000	616020000	185410000	92174000	412910000	454070000	315490000	218610000	357100000	463840000	555990000	145210000	105720000	100320000	81955000	64143000	105370000	82385000	145190000	119770000	79566000	80318000	106250000	83333000	39
tr|A0A1S4BW49|A0A1S4BW49_TOBAC;tr|A0A1S3XZK5|A0A1S3XZK5_TOBAC	tr|A0A1S4BW49|A0A1S4BW49_TOBAC uncharacterized protein LOC107812456 OS=Nicotiana tabacum OX=4097 GN=LOC107812456 PE=3 SV=1;tr|A0A1S3XZK5|A0A1S3XZK5_TOBAC uncharacterized protein LOC107770348 OS=Nicotiana tabacum OX=4097 GN=LOC107770348 PE=3 SV=1	1	1	1	2.6	2.6	2.6	4.1562	21557000	43093000	19079000	13615000	41293000	54012000	41125000	16325000	35721000	36946000	33471000	15015000	0	0	0	0	0	0	0	0	0	0	0	0	8
tr|A0A1S3Y027|A0A1S3Y027_TOBAC;tr|A0A1S4AXE3|A0A1S4AXE3_TOBAC;tr|A0A1S4AXE5|A0A1S4AXE5_TOBAC	tr|A0A1S3Y027|A0A1S3Y027_TOBAC nucleolin-like OS=Nicotiana tabacum OX=4097 GN=LOC107770526 PE=4 SV=1;tr|A0A1S4AXE3|A0A1S4AXE3_TOBAC heterogeneous nuclear ribonucleoprotein R-like isoform X2 OS=Nicotiana tabacum OX=4097 GN=LOC107802337 PE=4 SV=1;tr|A0A1S4AX	1	1	1	1.8	1.8	1.8	4.1718	37528000	109120000	15861000	16121000	50995000	48459000	24861000	15551000	53008000	41056000	60924000	20241000	0	0	0	0	0	0	0	0	0	0	0	0	1
tr|A0A1S3Y035|A0A1S3Y035_TOBAC;tr|A0A1S4A0C9|A0A1S4A0C9_TOBAC	tr|A0A1S3Y035|A0A1S3Y035_TOBAC Ribulose bisphosphate carboxylase/oxygenase activase, chloroplastic OS=Nicotiana tabacum OX=4097 GN=LOC107770767 PE=3 SV=1;tr|A0A1S4A0C9|A0A1S4A0C9_TOBAC Ribulose bisphosphate carboxylase/oxygenase activase, chloroplastic OS=	3	2	2	10.3	7.7	7.7	7.5211	201670000	2440300000	77576000	55850000	1535400000	1028100000	638800000	1319600	1169400000	59861000	432780000	6531000	0	1063200000	0	0	718430000	589640000	619920000	0	610370000	0	416150000	0	4
tr|A0A1S3ZUS5|A0A1S3ZUS5_TOBAC;tr|A0A1S3YYX5|A0A1S3YYX5_TOBAC;tr|M4N8X4|M4N8X4_TOBAC;tr|A0A1S3Y041|A0A1S3Y041_TOBAC;tr|M4N6Y7|M4N6Y7_TOBAC;tr|A0A1S3ZUM3|A0A1S3ZUM3_TOBAC	tr|A0A1S3ZUS5|A0A1S3ZUS5_TOBAC Calcineurin B-like protein OS=Nicotiana tabacum OX=4097 GN=LOC107790626 PE=3 SV=1;tr|A0A1S3YYX5|A0A1S3YYX5_TOBAC Calcineurin B-like protein OS=Nicotiana tabacum OX=4097 GN=LOC107781368 PE=3 SV=1;tr|M4N8X4|M4N8X4_TOBAC Calcine	1	1	1	9.4	9.4	9.4	-2	52512000	0	29504000	35166000	0	62769000	45673000	24668000	36169000	105630000	110140000	33449000	0	0	0	0	0	0	0	0	0	0	0	0	1
tr|A0A1S3Y0B8|A0A1S3Y0B8_TOBAC;tr|A0A1S3Y0Y0|A0A1S3Y0Y0_TOBAC;tr|A0A1S3ZXK8|A0A1S3ZXK8_TOBAC	tr|A0A1S3Y0B8|A0A1S3Y0B8_TOBAC ABC transporter B family member 28-like isoform X2 OS=Nicotiana tabacum OX=4097 GN=LOC107770825 PE=4 SV=1;tr|A0A1S3Y0Y0|A0A1S3Y0Y0_TOBAC ABC transporter B family member 28-like isoform X1 OS=Nicotiana tabacum OX=4097 GN=LOC10	11	11	11	25.2	25.2	25.2	237.08	2160500000	2969100000	1250700000	852260000	1976700000	1468400000	797600000	423500000	930370000	869550000	1257800000	669070000	698950000	584450000	785530000	727270000	823930000	440470000	437650000	427910000	354240000	263390000	378060000	505620000	58
tr|A0A1S3YQU6|A0A1S3YQU6_TOBAC;tr|A0A1S3Y0E5|A0A1S3Y0E5_TOBAC	tr|A0A1S3YQU6|A0A1S3YQU6_TOBAC adenylate kinase OS=Nicotiana tabacum OX=4097 GN=LOC107778794 PE=3 SV=1;tr|A0A1S3Y0E5|A0A1S3Y0E5_TOBAC adenylate kinase OS=Nicotiana tabacum OX=4097 GN=LOC107770764 PE=3 SV=1	2	2	2	3.9	3.9	3.9	6.049	0	12941000	1765100	0	18404000	32935000	0	2325300	27136000	41961000	17408000	0	0	0	0	0	0	0	0	0	0	0	0	0	1
tr|A0A1S3Y0G3|A0A1S3Y0G3_TOBAC	tr|A0A1S3Y0G3|A0A1S3Y0G3_TOBAC RING-type E3 ubiquitin transferase OS=Nicotiana tabacum OX=4097 GN=LOC107770643 PE=4 SV=1	1	1	1	1.8	1.8	1.8	-2	0	26628000	0	0	11370000	0	0	0	71623000	51390000	56816000	8624900	0	0	0	0	0	0	0	0	0	0	0	0	0
tr|A0A1S3Y0H1|A0A1S3Y0H1_TOBAC	tr|A0A1S3Y0H1|A0A1S3Y0H1_TOBAC 3-ketoacyl-CoA thiolase 2, peroxisomal-like OS=Nicotiana tabacum OX=4097 GN=LOC107770901 PE=3 SV=1	3	2	2	5.6	3.7	3.7	10.635	232780000	212050000	112810000	128030000	391030000	285300000	266060000	60671000	364810000	216160000	136500000	127600000	125830000	85609000	110020000	119130000	131400000	125150000	204810000	87101000	119490000	96982000	68888000	134520000	6
tr|A0A1S4AU26|A0A1S4AU26_TOBAC;tr|A0A1S3Y0J7|A0A1S3Y0J7_TOBAC	tr|A0A1S4AU26|A0A1S4AU26_TOBAC ABC transporter D family member 1-like OS=Nicotiana tabacum OX=4097 GN=LOC107801433 PE=4 SV=1;tr|A0A1S3Y0J7|A0A1S3Y0J7_TOBAC ABC transporter D family member 1-like OS=Nicotiana tabacum OX=4097 GN=LOC107770907 PE=4 SV=1	1	1	1	0.9	0.9	0.9	3.5445	4866400	0	5014100	2331200	5006300	4330200	2734300	3251000	4585000	0	3008400	5201900	0	0	0	0	0	0	0	0	0	0	0	0	7
tr|A0A1S4CQ23|A0A1S4CQ23_TOBAC;tr|A0A1S4B410|A0A1S4B410_TOBAC;tr|A0A1S3YBV7|A0A1S3YBV7_TOBAC;tr|A0A1S3Y0M0|A0A1S3Y0M0_TOBAC	tr|A0A1S4CQ23|A0A1S4CQ23_TOBAC T-complex protein 1 subunit gamma OS=Nicotiana tabacum OX=4097 GN=LOC107821431 PE=3 SV=1;tr|A0A1S4B410|A0A1S4B410_TOBAC T-complex protein 1 subunit gamma OS=Nicotiana tabacum OX=4097 GN=LOC107804248 PE=3 SV=1;tr|A0A1S3YBV7|A0	3	3	3	7.6	7.6	7.6	29.055	91909000	132690000	36161000	26759000	63142000	52716000	27163000	35284000	102600000	40671000	38316000	31700000	85319000	21223000	37578000	41582000	31839000	21978000	22209000	39967000	30398000	17867000	0	33541000	16
tr|A0A1S3Y0R1|A0A1S3Y0R1_TOBAC	tr|A0A1S3Y0R1|A0A1S3Y0R1_TOBAC pentatricopeptide repeat-containing protein At1g26460, mitochondrial-like OS=Nicotiana tabacum OX=4097 GN=LOC107770976 PE=4 SV=1	2	2	1	4.9	4.9	3.6	8.6024	61665000	126890000	69053000	39282000	114360000	44038000	25750000	21343000	56948000	139520000	124550000	44201000	39063000	37925000	59040000	41922000	47900000	0	0	0	0	46872000	40195000	0	8
tr|A0A1S3Y0T4|A0A1S3Y0T4_TOBAC;tr|A0A1S4B6T0|A0A1S4B6T0_TOBAC;tr|A0A1S3YSZ3|A0A1S3YSZ3_TOBAC	tr|A0A1S3Y0T4|A0A1S3Y0T4_TOBAC elongation factor 2 OS=Nicotiana tabacum OX=4097 GN=LOC107770769 PE=3 SV=1;tr|A0A1S4B6T0|A0A1S4B6T0_TOBAC elongation factor 2-like OS=Nicotiana tabacum OX=4097 GN=LOC107805110 PE=3 SV=1;tr|A0A1S3YSZ3|A0A1S3YSZ3_TOBAC elongati	22	22	22	34.3	34.3	34.3	235.5	5897700000	6572500000	4101300000	3170300000	4461700000	5069400000	2159700000	3021600000	7523500000	6595500000	5334400000	3576900000	3024000000	2160300000	2561400000	2536500000	1284800000	1513800000	1243600000	2382100000	2313600000	2100800000	1553400000	2742600000	127
tr|A5A2F9|A5A2F9_TOBAC;tr|A0A1S3Y0V9|A0A1S3Y0V9_TOBAC	tr|A5A2F9|A5A2F9_TOBAC Phosphoinositide phospholipase C OS=Nicotiana tabacum OX=4097 GN=LOC107804925 PE=2 SV=1;tr|A0A1S3Y0V9|A0A1S3Y0V9_TOBAC Phosphoinositide phospholipase C OS=Nicotiana tabacum OX=4097 GN=LOC107770942 PE=4 SV=1	1	1	1	3.7	3.7	3.7	2.6878	42123000	55938000	31764000	29678000	33680000	0	32636000	33300000	44738000	32105000	73078000	37497000	0	0	0	0	0	0	0	0	0	0	0	0	1
tr|A0A1S4AXS1|A0A1S4AXS1_TOBAC;tr|A0A1S3Y0W1|A0A1S3Y0W1_TOBAC	tr|A0A1S4AXS1|A0A1S4AXS1_TOBAC uncharacterized protein LOC107802475 OS=Nicotiana tabacum OX=4097 GN=LOC107802475 PE=4 SV=1;tr|A0A1S3Y0W1|A0A1S3Y0W1_TOBAC uncharacterized protein LOC107771029 OS=Nicotiana tabacum OX=4097 GN=LOC107771029 PE=4 SV=1	2	2	2	13.2	13.2	13.2	16.042	3842000000	3215900000	2188900000	2193500000	3221700000	1617000000	1374200000	585490000	2481300000	2699900000	3438100000	917440000	2245100000	0	2209000000	2352500000	1445300000	547430000	914090000	746240000	1056900000	1035600000	1063200000	988110000	24
tr|A0A1S4BB30|A0A1S4BB30_TOBAC;tr|A0A1S3Y0W8|A0A1S3Y0W8_TOBAC	tr|A0A1S4BB30|A0A1S4BB30_TOBAC Small nuclear ribonucleoprotein E OS=Nicotiana tabacum OX=4097 GN=LOC107806389 PE=3 SV=1;tr|A0A1S3Y0W8|A0A1S3Y0W8_TOBAC Small nuclear ribonucleoprotein E OS=Nicotiana tabacum OX=4097 GN=LOC107770810 PE=3 SV=1	2	2	2	22.7	22.7	22.7	41.62	77706000	76924000	64844000	68954000	69892000	125770000	127100000	50735000	120580000	205210000	191140000	78132000	43373000	0	60860000	69573000	27296000	37581000	70280000	54780000	44505000	61309000	57103000	72793000	20
tr|A0A1S3Y0X0|A0A1S3Y0X0_TOBAC;tr|A0A1S4D0V6|A0A1S4D0V6_TOBAC	tr|A0A1S3Y0X0|A0A1S3Y0X0_TOBAC casein kinase I-like OS=Nicotiana tabacum OX=4097 GN=LOC107770915 PE=4 SV=1;tr|A0A1S4D0V6|A0A1S4D0V6_TOBAC casein kinase I-like OS=Nicotiana tabacum OX=4097 GN=LOC107824782 PE=4 SV=1	8	7	6	13.3	12.1	10.8	48.824	400860000	577960000	293480000	159050000	572560000	449270000	213890000	55572000	361450000	317750000	547110000	153040000	163510000	112160000	105930000	108110000	189390000	98245000	107390000	21429000	97408000	109940000	133650000	45222000	31
tr|A0A1S3Y0Y1|A0A1S3Y0Y1_TOBAC;tr|A0A1S4C503|A0A1S4C503_TOBAC	tr|A0A1S3Y0Y1|A0A1S3Y0Y1_TOBAC 60S acidic ribosomal protein P2A-like OS=Nicotiana tabacum OX=4097 GN=LOC107771057 PE=3 SV=1;tr|A0A1S4C503|A0A1S4C503_TOBAC 60S acidic ribosomal protein P2A-like OS=Nicotiana tabacum OX=4097 GN=LOC107815227 PE=3 SV=1	4	4	4	79.5	79.5	79.5	113.01	1905100000	5821300000	2279900000	1759100000	2934500000	1036300000	3428900000	3766900000	3354400000	3514200000	7506500000	1185300000	1709600000	2308300000	2676200000	2730600000	1595400000	1857500000	2298400000	3989200000	1572700000	1487700000	2756000000	1254300000	36
tr|A0A1S3Y100|A0A1S3Y100_TOBAC;tr|A0A1S4BC47|A0A1S4BC47_TOBAC	tr|A0A1S3Y100|A0A1S3Y100_TOBAC Chlorophyll a-b binding protein, chloroplastic OS=Nicotiana tabacum OX=4097 GN=LOC107770844 PE=3 SV=1;tr|A0A1S4BC47|A0A1S4BC47_TOBAC Chlorophyll a-b binding protein, chloroplastic OS=Nicotiana tabacum OX=4097 GN=LOC107806780	11	11	0	79.4	79.4	0	203.7	30726000000	45742000000	19377000000	17367000000	24722000000	46027000000	25163000000	31270000000	49651000000	44832000000	50243000000	20557000000	7874600000	5077300000	7996900000	8442900000	3623400000	5804400000	5961900000	16046000000	8475600000	6109600000	6530500000	8276400000	414
tr|A0A1S4AGI6|A0A1S4AGI6_TOBAC;tr|A0A1S3YVN8|A0A1S3YVN8_TOBAC;tr|A0A1S3Y108|A0A1S3Y108_TOBAC	tr|A0A1S4AGI6|A0A1S4AGI6_TOBAC Histone H2A OS=Nicotiana tabacum OX=4097 GN=LOC107797366 PE=3 SV=1;tr|A0A1S3YVN8|A0A1S3YVN8_TOBAC Histone H2A OS=Nicotiana tabacum OX=4097 GN=LOC107780380 PE=3 SV=1;tr|A0A1S3Y108|A0A1S3Y108_TOBAC Histone H2A OS=Nicotiana taba	4	3	2	51.1	44.4	39.1	13.831	52958000	1420400000	39444000	34197000	969410000	2328400000	1621500000	61721000	1344700000	1806500000	219140000	43787000	0	946640000	192780000	0	1108200000	1048000000	643320000	101000000	455710000	1002300000	283190000	170180000	14
tr|A0A1S3Y124|A0A1S3Y124_TOBAC	tr|A0A1S3Y124|A0A1S3Y124_TOBAC 60S acidic ribosomal protein P2-1-like OS=Nicotiana tabacum OX=4097 GN=LOC107770879 PE=3 SV=1	4	4	3	62.8	62.8	47.8	68.447	1694200000	1753100000	1120700000	996780000	558590000	1281800000	977230000	650330000	776730000	1281100000	1323300000	644840000	481250000	406510000	896910000	822730000	195530000	330780000	502530000	595590000	221030000	343800000	363410000	505320000	41
tr|A0A1S3Y169|A0A1S3Y169_TOBAC;tr|A0A1S3Y133|A0A1S3Y133_TOBAC;tr|A0A1S4AXS6|A0A1S4AXS6_TOBAC;tr|A0A1S4AJ37|A0A1S4AJ37_TOBAC;tr|A0A1S4A5X6|A0A1S4A5X6_TOBAC;tr|A0A1S3YQQ9|A0A1S3YQQ9_TOBAC;tr|A0A1S4D1P9|A0A1S4D1P9_TOBAC	tr|A0A1S3Y169|A0A1S3Y169_TOBAC hypersensitive-induced response protein 1-like isoform X2 OS=Nicotiana tabacum OX=4097 GN=LOC107771030 PE=4 SV=1;tr|A0A1S3Y133|A0A1S3Y133_TOBAC hypersensitive-induced response protein 1-like isoform X1 OS=Nicotiana tabacum OX	5	5	5	20	20	20	15.819	159680000	285080000	57394000	58467000	220230000	365840000	134370000	134040000	543270000	670070000	468160000	132950000	70997000	67273000	56423000	70985000	60261000	104910000	58639000	104300000	157570000	130340000	103240000	72717000	22
tr|A0A1S4CZY5|A0A1S4CZY5_TOBAC;tr|A0A1S3Y149|A0A1S3Y149_TOBAC;tr|A0A1S4DIF2|A0A1S4DIF2_TOBAC;tr|A0A1S4CY69|A0A1S4CY69_TOBAC;tr|A0A1S4CL89|A0A1S4CL89_TOBAC	tr|A0A1S4CZY5|A0A1S4CZY5_TOBAC cysteine-rich receptor-like protein kinase 2 isoform X2 OS=Nicotiana tabacum OX=4097 GN=LOC107823620 PE=4 SV=1;tr|A0A1S3Y149|A0A1S3Y149_TOBAC cysteine-rich receptor-like protein kinase 2 OS=Nicotiana tabacum OX=4097 GN=LOC107	3	3	2	4.4	4.4	2.8	7.7801	35765000	65486000	14232000	8215300	39163000	46265000	10570000	4716700	28365000	36303000	0	9902100	0	0	0	0	0	0	0	0	0	0	0	0	5
tr|A0A1S3Y166|A0A1S3Y166_TOBAC;tr|A0A1S4ASK9|A0A1S4ASK9_TOBAC;tr|A0A1S4AS83|A0A1S4AS83_TOBAC;tr|A0A1S3YL52|A0A1S3YL52_TOBAC;tr|A0A1S3Y222|A0A1S3Y222_TOBAC	tr|A0A1S3Y166|A0A1S3Y166_TOBAC kirola-like OS=Nicotiana tabacum OX=4097 GN=LOC107770929 PE=4 SV=1;tr|A0A1S4ASK9|A0A1S4ASK9_TOBAC kirola-like OS=Nicotiana tabacum OX=4097 GN=LOC107800813 PE=4 SV=1;tr|A0A1S4AS83|A0A1S4AS83_TOBAC kirola-like OS=Nicotiana taba	2	2	2	10.9	10.9	10.9	3.137	85738000	118490000	66522000	70446000	106330000	218270000	129570000	20912000	197750000	228420000	371100000	58870000	42483000	36060000	51201000	59197000	37856000	48175000	64768000	0	55100000	63262000	68315000	47882000	14
tr|A0A1S4BHM7|A0A1S4BHM7_TOBAC;tr|A0A1S3Y184|A0A1S3Y184_TOBAC	tr|A0A1S4BHM7|A0A1S4BHM7_TOBAC splicing factor 3B subunit 2-like OS=Nicotiana tabacum OX=4097 GN=LOC107808380 PE=4 SV=1;tr|A0A1S3Y184|A0A1S3Y184_TOBAC splicing factor 3B subunit 2-like OS=Nicotiana tabacum OX=4097 GN=LOC107771044 PE=4 SV=1	1	1	1	3.7	3.7	3.7	4.1496	0	106610000	8650400	9325000	0	55291000	15488000	0	31269000	26304000	54445000	13536000	0	0	0	0	0	0	0	0	0	0	0	0	1
tr|A0A1S3YUR0|A0A1S3YUR0_TOBAC;tr|A0A1S3Y1A8|A0A1S3Y1A8_TOBAC;tr|A0A1S3XG28|A0A1S3XG28_TOBAC;tr|A0A1S4CQN2|A0A1S4CQN2_TOBAC;sp|O80363|RK17_TOBAC	tr|A0A1S3YUR0|A0A1S3YUR0_TOBAC 50S ribosomal protein L17, chloroplastic-like OS=Nicotiana tabacum OX=4097 GN=LOC107779789 PE=3 SV=1;tr|A0A1S3Y1A8|A0A1S3Y1A8_TOBAC 50S ribosomal protein L17, chloroplastic-like OS=Nicotiana tabacum OX=4097 GN=LOC107771075 PE	3	3	3	14.9	14.9	14.9	8.7453	280210000	624200000	136140000	152250000	356800000	357580000	235940000	86321000	329610000	371500000	598240000	62343000	124060000	215240000	106190000	111440000	93896000	108100000	110540000	79579000	74057000	90209000	96830000	58026000	19
tr|A0A1S3Y1D1|A0A1S3Y1D1_TOBAC;tr|A0A1S3Z863|A0A1S3Z863_TOBAC	tr|A0A1S3Y1D1|A0A1S3Y1D1_TOBAC Acyl-coenzyme A oxidase OS=Nicotiana tabacum OX=4097 GN=LOC107771125 PE=3 SV=1;tr|A0A1S3Z863|A0A1S3Z863_TOBAC Acyl-coenzyme A oxidase OS=Nicotiana tabacum OX=4097 GN=LOC107783887 PE=3 SV=1	4	4	4	8.9	8.9	8.9	12.944	110190000	177640000	88029000	21048000	299640000	155730000	146060000	32237000	135560000	80573000	107410000	51383000	0	0	0	0	91443000	0	70418000	0	0	0	0	0	6
tr|A9XG41|A9XG41_TOBAC;tr|A9XG40|A9XG40_TOBAC;tr|A0A1S3YYW3|A0A1S3YYW3_TOBAC;tr|A0A1S3Y1D2|A0A1S3Y1D2_TOBAC	tr|A9XG41|A9XG41_TOBAC Subtilisin-like protease OS=Nicotiana tabacum OX=4097 GN=SBT1.1B PE=2 SV=1;tr|A9XG40|A9XG40_TOBAC Subtilisin-like protease OS=Nicotiana tabacum OX=4097 GN=SBT1.1A PE=2 SV=1;tr|A0A1S3YYW3|A0A1S3YYW3_TOBAC subtilisin-like protease SBT1	1	1	1	3.1	3.1	3.1	3.6486	0	55501000	0	47558000	0	0	33479000	0	0	0	0	26686000	0	0	0	0	0	0	0	0	0	0	0	0	1
tr|A0A1S4B3S0|A0A1S4B3S0_TOBAC;tr|A0A1S4AJI4|A0A1S4AJI4_TOBAC;tr|A0A1S3ZQA2|A0A1S3ZQA2_TOBAC;tr|A0A1S3Y1E2|A0A1S3Y1E2_TOBAC	tr|A0A1S4B3S0|A0A1S4B3S0_TOBAC ATP-dependent Clp protease ATP-binding subunit ClpA homolog CD4B, chloroplastic-like OS=Nicotiana tabacum OX=4097 GN=LOC107804165 PE=3 SV=1;tr|A0A1S4AJI4|A0A1S4AJI4_TOBAC ATP-dependent Clp protease ATP-binding subunit ClpA ho	26	26	25	38.5	38.5	37.4	323.31	3175400000	4515000000	1605800000	1430300000	3981400000	3741600000	1470400000	1185000000	3917600000	3695700000	3763300000	1657600000	482920000	309250000	371850000	403780000	370290000	358410000	259080000	351440000	339400000	292940000	300700000	421410000	177
tr|A0A1S3Y1N9|A0A1S3Y1N9_TOBAC	tr|A0A1S3Y1N9|A0A1S3Y1N9_TOBAC Vacuolar protein sorting-associated protein 35 OS=Nicotiana tabacum OX=4097 GN=LOC107771103 PE=3 SV=1	1	1	1	4.2	4.2	4.2	12.699	29346000	28065000	18215000	16057000	16339000	26540000	0	16451000	19825000	11840000	27985000	21469000	0	0	0	0	0	0	0	0	0	0	0	0	5
tr|A0A1S3Y1V1|A0A1S3Y1V1_TOBAC;tr|A0A1S4DL03|A0A1S4DL03_TOBAC	tr|A0A1S3Y1V1|A0A1S3Y1V1_TOBAC 50S ribosomal protein L18, chloroplastic OS=Nicotiana tabacum OX=4097 GN=LOC107771278 PE=3 SV=1;tr|A0A1S4DL03|A0A1S4DL03_TOBAC 50S ribosomal protein L18, chloroplastic-like OS=Nicotiana tabacum OX=4097 GN=LOC107830818 PE=3 SV	1	1	1	6.8	6.8	6.8	7.6594	32284000	180280000	52649000	28524000	66635000	206780000	68760000	29066000	165020000	143350000	187170000	22340000	0	0	0	0	0	0	0	0	0	0	0	0	2
tr|A0A1S3YLM2|A0A1S3YLM2_TOBAC;tr|A0A1S3Y1V9|A0A1S3Y1V9_TOBAC;tr|A0A1S4ADP2|A0A1S4ADP2_TOBAC;tr|A0A1S4A481|A0A1S4A481_TOBAC;tr|A0A1S3XEC4|A0A1S3XEC4_TOBAC;tr|Q6IVK6|Q6IVK6_TOBAC;tr|Q6IVK7|Q6IVK7_TOBAC;tr|A0A1S4A3B7|A0A1S4A3B7_TOBAC;tr|A0A1S4A3E3|A0A1S4A3E3_TOBAC	tr|A0A1S3YLM2|A0A1S3YLM2_TOBAC UDP-glucose 6-dehydrogenase OS=Nicotiana tabacum OX=4097 GN=LOC107777397 PE=3 SV=1;tr|A0A1S3Y1V9|A0A1S3Y1V9_TOBAC UDP-glucose 6-dehydrogenase OS=Nicotiana tabacum OX=4097 GN=LOC107771267 PE=3 SV=1;tr|A0A1S4ADP2|A0A1S4ADP2_TOB	4	4	4	13.8	13.8	13.8	58.676	596570000	159510000	154810000	253810000	321300000	332940000	172850000	110010000	454580000	431770000	319040000	82798000	207450000	0	0	223910000	180190000	170920000	161190000	168040000	264410000	202640000	178860000	0	10
tr|A0A1S3Y1X1|A0A1S3Y1X1_TOBAC;tr|A0A1S3YPS0|A0A1S3YPS0_TOBAC;tr|A0A1S3Y1Y6|A0A1S3Y1Y6_TOBAC	tr|A0A1S3Y1X1|A0A1S3Y1X1_TOBAC uncharacterized protein LOC107771300 isoform X2 OS=Nicotiana tabacum OX=4097 GN=LOC107771300 PE=4 SV=1;tr|A0A1S3YPS0|A0A1S3YPS0_TOBAC UPF0261 protein y4oU-like OS=Nicotiana tabacum OX=4097 GN=LOC107778320 PE=4 SV=1;tr|A0A1S3Y	1	1	1	4.3	4.3	4.3	4.4054	14914000	13101000	13477000	9501800	9063000	17191000	6630700	13343000	8753100	0	0	8778400	0	0	0	0	0	0	0	0	0	0	0	0	3
tr|A0A1S3Y1Y7|A0A1S3Y1Y7_TOBAC;tr|A0A1S4AIB4|A0A1S4AIB4_TOBAC;tr|A0A1S3YHB2|A0A1S3YHB2_TOBAC;tr|A0A1S4AHT5|A0A1S4AHT5_TOBAC;tr|A0A1S3YGB4|A0A1S3YGB4_TOBAC;tr|A0A1S3X354|A0A1S3X354_TOBAC	tr|A0A1S3Y1Y7|A0A1S3Y1Y7_TOBAC wall-associated receptor kinase 2-like OS=Nicotiana tabacum OX=4097 GN=LOC107771394 PE=4 SV=1;tr|A0A1S4AIB4|A0A1S4AIB4_TOBAC wall-associated receptor kinase 2-like OS=Nicotiana tabacum OX=4097 GN=LOC107797767 PE=4 SV=1;tr|A0A	4	4	4	8.3	8.3	8.3	34.217	886430000	370960000	506300000	407850000	804200000	1081500000	791470000	570710000	707830000	835170000	789450000	416640000	737500000	189430000	648770000	511050000	440860000	494220000	627120000	802700000	317680000	242300000	348040000	689180000	26
tr|A0A1S3ZRS8|A0A1S3ZRS8_TOBAC;tr|A0A1S3Y1Y9|A0A1S3Y1Y9_TOBAC	tr|A0A1S3ZRS8|A0A1S3ZRS8_TOBAC urease OS=Nicotiana tabacum OX=4097 GN=LOC107789640 PE=4 SV=1;tr|A0A1S3Y1Y9|A0A1S3Y1Y9_TOBAC Urease OS=Nicotiana tabacum OX=4097 GN=LOC107771310 PE=3 SV=1	1	1	1	12	12	12	5.2835	19450000	21279000	6908700	6293900	5507200	13438000	8556500	15946000	15093000	0	21074000	11841000	0	0	0	0	0	0	0	0	0	0	0	0	11
tr|A0A1S4D3A0|A0A1S4D3A0_TOBAC;tr|A0A1S3Y200|A0A1S3Y200_TOBAC;tr|A0A1S4D2T9|A0A1S4D2T9_TOBAC	tr|A0A1S4D3A0|A0A1S4D3A0_TOBAC Alpha-1,4 glucan phosphorylase OS=Nicotiana tabacum OX=4097 GN=LOC107825407 PE=3 SV=1;tr|A0A1S3Y200|A0A1S3Y200_TOBAC Alpha-1,4 glucan phosphorylase OS=Nicotiana tabacum OX=4097 GN=LOC107771409 PE=3 SV=1;tr|A0A1S4D2T9|A0A1S4D2	10	10	8	11.3	11.3	9.4	33.417	822780000	1347700000	519240000	451110000	703510000	1167100000	544220000	467100000	1001100000	966210000	1005600000	665380000	384750000	285140000	415330000	439760000	429640000	416070000	458640000	444990000	549420000	422950000	467080000	639380000	22
tr|A0A1S4A5P3|A0A1S4A5P3_TOBAC;tr|A0A1S3Y2G0|A0A1S3Y2G0_TOBAC;tr|A0A1S4CHA4|A0A1S4CHA4_TOBAC;tr|A0A1S3ZD71|A0A1S3ZD71_TOBAC	tr|A0A1S4A5P3|A0A1S4A5P3_TOBAC WD repeat-containing protein VIP3-like OS=Nicotiana tabacum OX=4097 GN=LOC107793953 PE=4 SV=1;tr|A0A1S3Y2G0|A0A1S3Y2G0_TOBAC WD repeat-containing protein VIP3-like OS=Nicotiana tabacum OX=4097 GN=LOC107771470 PE=4 SV=1;tr|A0A	1	1	1	3.7	3.7	3.7	3.4375	23207000	70521000	15500000	14637000	41263000	107610000	61066000	0	36996000	54635000	37876000	22467000	0	0	0	0	0	0	0	0	0	0	0	0	1
tr|A0A1S4DPB8|A0A1S4DPB8_TOBAC;tr|A0A1S3Y2H0|A0A1S3Y2H0_TOBAC	tr|A0A1S4DPB8|A0A1S4DPB8_TOBAC persulfide dioxygenase ETHE1 homolog, mitochondrial-like OS=Nicotiana tabacum OX=4097 GN=LOC107831711 PE=4 SV=1;tr|A0A1S3Y2H0|A0A1S3Y2H0_TOBAC persulfide dioxygenase ETHE1 homolog, mitochondrial-like OS=Nicotiana tabacum OX=4	1	1	1	3.8	3.8	3.8	3.2842	79249000	66744000	74950000	75482000	0	88218000	87538000	70946000	93182000	0	81603000	103230000	0	0	0	0	0	0	0	0	0	0	0	0	5
tr|A0A1S3Y2I1|A0A1S3Y2I1_TOBAC;tr|F2VJ75|F2VJ75_TOBAC	tr|A0A1S3Y2I1|A0A1S3Y2I1_TOBAC Fructose-bisphosphate aldolase OS=Nicotiana tabacum OX=4097 GN=LOC107771489 PE=3 SV=1;tr|F2VJ75|F2VJ75_TOBAC Fructose-bisphosphate aldolase OS=Nicotiana tabacum OX=4097 GN=LOC107797422 PE=2 SV=1	10	3	3	37.9	17.1	17.1	93.108	1708500000	1018200000	479320000	255770000	451190000	599540000	309500000	905540000	2143600000	1529500000	1161500000	570790000	605850000	384760000	622230000	326370000	213090000	283150000	196580000	889500000	727770000	452470000	279860000	560070000	40
tr|A0A1S3ZQH2|A0A1S3ZQH2_TOBAC;tr|A0A1S3Y2M3|A0A1S3Y2M3_TOBAC	tr|A0A1S3ZQH2|A0A1S3ZQH2_TOBAC protein argonaute 1-like OS=Nicotiana tabacum OX=4097 GN=LOC107789474 PE=3 SV=1;tr|A0A1S3Y2M3|A0A1S3Y2M3_TOBAC protein argonaute 1-like OS=Nicotiana tabacum OX=4097 GN=LOC107771391 PE=3 SV=1	8	8	3	10.5	10.5	3.4	104.69	435570000	452160000	249460000	230080000	527040000	465030000	270170000	192920000	331850000	432590000	892140000	185730000	122840000	73262000	147480000	137640000	130020000	79656000	93051000	89047000	84352000	100680000	105830000	104070000	36
tr|A0A1S3Y346|A0A1S3Y346_TOBAC;tr|A0A1S3ZQ81|A0A1S3ZQ81_TOBAC;tr|A0A1S3ZFX2|A0A1S3ZFX2_TOBAC	tr|A0A1S3Y346|A0A1S3Y346_TOBAC T-complex protein 1 subunit alpha OS=Nicotiana tabacum OX=4097 GN=LOC107771644 PE=3 SV=1;tr|A0A1S3ZQ81|A0A1S3ZQ81_TOBAC T-complex protein 1 subunit alpha-like OS=Nicotiana tabacum OX=4097 GN=LOC107789199 PE=3 SV=1;tr|A0A1S3ZF	2	2	2	3.9	3.9	3.9	5.6139	103250000	420940000	56048000	48748000	97704000	294150000	92391000	24428000	137960000	139120000	218480000	34387000	72296000	175180000	65663000	69767000	0	138200000	0	0	71886000	0	86761000	0	11
tr|A0A1S3Y350|A0A1S3Y350_TOBAC	tr|A0A1S3Y350|A0A1S3Y350_TOBAC 40S ribosomal protein S8 OS=Nicotiana tabacum OX=4097 GN=LOC107771534 PE=3 SV=1	6	1	1	32.3	7.2	7.2	3.22	0	0	101880	0	9629300	12383000	5295700	0	6136300	8185400	10124000	0	0	0	0	0	0	0	0	0	0	0	0	0	4
tr|A0A1S4CLV5|A0A1S4CLV5_TOBAC;tr|A0A1S3Y351|A0A1S3Y351_TOBAC	tr|A0A1S4CLV5|A0A1S4CLV5_TOBAC RNA-binding protein 2-like OS=Nicotiana tabacum OX=4097 GN=LOC107820432 PE=4 SV=1;tr|A0A1S3Y351|A0A1S3Y351_TOBAC RNA-binding protein 2-like OS=Nicotiana tabacum OX=4097 GN=LOC107771652 PE=4 SV=1	1	1	1	11.6	11.6	11.6	5.0609	27347000	32084000	26626000	26637000	36003000	61552000	0	32761000	29840000	0	23379000	31284000	0	0	0	0	0	0	0	0	0	0	0	0	7
tr|A0A1S3Y3C4|A0A1S3Y3C4_TOBAC;tr|A0A1S4B0C8|A0A1S4B0C8_TOBAC	tr|A0A1S3Y3C4|A0A1S3Y3C4_TOBAC 5-methylthioadenosine/S-adenosylhomocysteine nucleosidase 2-like OS=Nicotiana tabacum OX=4097 GN=LOC107771706 PE=4 SV=1;tr|A0A1S4B0C8|A0A1S4B0C8_TOBAC 5-methylthioadenosine/S-adenosylhomocysteine nucleosidase 2-like OS=Nico	4	4	4	28.8	28.8	28.8	46.085	122690000	83104000	58366000	51870000	31219000	158970000	84045000	122180000	201560000	151090000	208510000	102530000	47599000	14384000	41590000	35340000	12903000	30263000	37244000	95211000	50379000	35136000	58664000	74866000	33
tr|A0A1S3Y433|A0A1S3Y433_TOBAC;tr|A0A1S3Y3D7|A0A1S3Y3D7_TOBAC;tr|A0A1S4B0F6|A0A1S4B0F6_TOBAC;tr|A0A1S3Y3E2|A0A1S3Y3E2_TOBAC;tr|A0A1S4AZZ9|A0A1S4AZZ9_TOBAC	tr|A0A1S3Y433|A0A1S3Y433_TOBAC pentatricopeptide repeat-containing protein MRL1, chloroplastic-like isoform X2 OS=Nicotiana tabacum OX=4097 GN=LOC107771712 PE=3 SV=1;tr|A0A1S3Y3D7|A0A1S3Y3D7_TOBAC pentatricopeptide repeat-containing protein MRL1, chloropla	1	1	1	7.4	7.4	7.4	4.1639	0	28522000	26816000	35316000	0	0	0	0	0	89838000	80435000	40705000	0	0	0	0	0	0	0	0	0	0	0	0	4
tr|A0A1S4ADS6|A0A1S4ADS6_TOBAC;tr|A0A1S3Y3E8|A0A1S3Y3E8_TOBAC	tr|A0A1S4ADS6|A0A1S4ADS6_TOBAC 54S ribosomal protein L24, mitochondrial-like OS=Nicotiana tabacum OX=4097 GN=LOC107796513 PE=3 SV=1;tr|A0A1S3Y3E8|A0A1S3Y3E8_TOBAC 54S ribosomal protein L24, mitochondrial-like OS=Nicotiana tabacum OX=4097 GN=LOC107771801 PE	1	1	1	3.9	3.9	3.9	2.5782	26124000	74323000	0	15177000	86859000	74187000	61945000	34407000	55799000	55098000	0	16538000	0	0	0	0	0	0	0	0	0	0	0	0	3
tr|A0A1S3Y3H4|A0A1S3Y3H4_TOBAC;tr|A0A1S3YI24|A0A1S3YI24_TOBAC	tr|A0A1S3Y3H4|A0A1S3Y3H4_TOBAC uncharacterized protein LOC107771755 OS=Nicotiana tabacum OX=4097 GN=LOC107771755 PE=4 SV=1;tr|A0A1S3YI24|A0A1S3YI24_TOBAC uncharacterized protein LOC107776320 OS=Nicotiana tabacum OX=4097 GN=LOC107776320 PE=4 SV=1	2	2	2	6.9	6.9	6.9	8.0011	126620000	75561000	46653000	34371000	125850000	125770000	69276000	41307000	140400000	255650000	137760000	51653000	0	0	0	0	0	0	0	0	0	0	0	0	8
tr|A0A1S3Y3H5|A0A1S3Y3H5_TOBAC;tr|A0A1S4CFN5|A0A1S4CFN5_TOBAC;tr|Q6E2S8|Q6E2S8_TOBAC	tr|A0A1S3Y3H5|A0A1S3Y3H5_TOBAC DNA-directed RNA polymerase subunit beta OS=Nicotiana tabacum OX=4097 GN=LOC107771619 PE=3 SV=1;tr|A0A1S4CFN5|A0A1S4CFN5_TOBAC DNA-directed RNA polymerase subunit beta OS=Nicotiana tabacum OX=4097 GN=LOC107818481 PE=3 SV=1;tr	2	2	2	1.9	1.9	1.9	5.6937	41738000	41168000	26079000	9854900	34144000	33042000	20876000	12244000	16946000	21886000	0	17317000	0	0	0	0	0	0	0	0	0	0	0	0	2
tr|A0A1S4D370|A0A1S4D370_TOBAC;tr|A0A1S4D311|A0A1S4D311_TOBAC;tr|A0A1S3Y3N1|A0A1S3Y3N1_TOBAC	tr|A0A1S4D370|A0A1S4D370_TOBAC ferredoxin-2-like isoform X2 OS=Nicotiana tabacum OX=4097 GN=LOC107825382 PE=4 SV=1;tr|A0A1S4D311|A0A1S4D311_TOBAC ferredoxin-2-like isoform X1 OS=Nicotiana tabacum OX=4097 GN=LOC107825382 PE=4 SV=1;tr|A0A1S3Y3N1|A0A1S3Y3N1_T	1	1	1	18.8	18.8	18.8	3.4769	0	0	56250000	80060000	84670000	193350000	178360000	123950000	73549000	0	191010000	128950000	0	0	0	0	0	0	0	0	0	0	0	0	1
tr|A0A1S3Y3Q6|A0A1S3Y3Q6_TOBAC	tr|A0A1S3Y3Q6|A0A1S3Y3Q6_TOBAC probable membrane metalloprotease ARASP2, chloroplastic OS=Nicotiana tabacum OX=4097 GN=LOC107771905 PE=4 SV=1	1	1	1	3.1	3.1	3.1	5.3817	134250000	176840000	35190000	39254000	120280000	192280000	88766000	43029000	121430000	97091000	0	53387000	0	0	0	0	0	0	0	0	0	0	0	0	9
tr|A0A1S3Z0K4|A0A1S3Z0K4_TOBAC;tr|A0A1S4A2U1|A0A1S4A2U1_TOBAC;tr|A0A1S3Y3U0|A0A1S3Y3U0_TOBAC;tr|A0A1S3Y2X9|A0A1S3Y2X9_TOBAC	tr|A0A1S3Z0K4|A0A1S3Z0K4_TOBAC Histone H2A OS=Nicotiana tabacum OX=4097 GN=LOC107781461 PE=3 SV=1;tr|A0A1S4A2U1|A0A1S4A2U1_TOBAC Histone H2A OS=Nicotiana tabacum OX=4097 GN=LOC107793131 PE=3 SV=1;tr|A0A1S3Y3U0|A0A1S3Y3U0_TOBAC Histone H2A OS=Nicotiana taba	4	3	3	41.4	34.6	34.6	100.89	174650000	1157200000	93276000	62767000	47489000	183480000	84743000	238670000	306170000	331600000	770030000	190420000	116310000	147620000	106830000	77722000	40803000	60676000	98533000	325680000	130470000	89317000	205150000	155240000	34
tr|A2Q0R1|A2Q0R1_TOBAC;tr|A0A1S3Y3V3|A0A1S3Y3V3_TOBAC;tr|A0A1S3ZMJ2|A0A1S3ZMJ2_TOBAC;tr|A0A1S3ZWE0|A0A1S3ZWE0_TOBAC	tr|A2Q0R1|A2Q0R1_TOBAC Uncharacterized protein WAKL1 OS=Nicotiana tabacum OX=4097 GN=WAKL1 PE=4 SV=1;tr|A0A1S3Y3V3|A0A1S3Y3V3_TOBAC wall-associated receptor kinase-like 20 OS=Nicotiana tabacum OX=4097 GN=LOC107771892 PE=4 SV=1;tr|A0A1S3ZMJ2|A0A1S3ZMJ2_TOBA	2	2	2	4.4	4.4	4.4	20.077	62385000	49871000	49586000	28430000	65557000	55848000	74627000	38047000	39791000	14078000	37399000	43631000	44117000	16095000	44263000	33032000	27528000	17878000	52555000	49958000	0	0	12770000	46065000	20
tr|A0A1S4A6K0|A0A1S4A6K0_TOBAC;tr|A0A1S3Y3V5|A0A1S3Y3V5_TOBAC;tr|A0A1S4C2I0|A0A1S4C2I0_TOBAC;tr|A0A1S3YWJ6|A0A1S3YWJ6_TOBAC	tr|A0A1S4A6K0|A0A1S4A6K0_TOBAC 60S ribosomal protein L31-like OS=Nicotiana tabacum OX=4097 GN=LOC107794303 PE=3 SV=1;tr|A0A1S3Y3V5|A0A1S3Y3V5_TOBAC 60S ribosomal protein L31 OS=Nicotiana tabacum OX=4097 GN=LOC107771890 PE=3 SV=1;tr|A0A1S4C2I0|A0A1S4C2I0_TO	2	2	2	27.5	27.5	27.5	15.798	17342000	510610000	32503000	0	92153000	0	0	11745000	55102000	267460000	68458000	15862000	0	166680000	0	0	0	0	0	0	0	85482000	0	0	8
tr|A0A1S4BR43|A0A1S4BR43_TOBAC;tr|A0A1S3Y3W0|A0A1S3Y3W0_TOBAC	tr|A0A1S4BR43|A0A1S4BR43_TOBAC thylakoid lumenal 16.5 kDa protein, chloroplastic-like OS=Nicotiana tabacum OX=4097 GN=LOC107811031 PE=4 SV=1;tr|A0A1S3Y3W0|A0A1S3Y3W0_TOBAC thylakoid lumenal 16.5 kDa protein, chloroplastic-like OS=Nicotiana tabacum OX=4097	3	3	3	10.4	10.4	10.4	9.7564	130500000	207830000	171130000	67266000	129400000	212050000	68001000	64044000	272080000	413690000	309840000	105620000	113980000	48539000	161180000	111520000	71474000	111620000	0	110890000	131170000	145680000	157220000	103800000	17
tr|A0A1S3Y3Y8|A0A1S3Y3Y8_TOBAC;tr|A0A1S3ZHC8|A0A1S3ZHC8_TOBAC	tr|A0A1S3Y3Y8|A0A1S3Y3Y8_TOBAC protein TIC 55, chloroplastic-like OS=Nicotiana tabacum OX=4097 GN=LOC107771918 PE=4 SV=1;tr|A0A1S3ZHC8|A0A1S3ZHC8_TOBAC protein TIC 55, chloroplastic-like OS=Nicotiana tabacum OX=4097 GN=LOC107786854 PE=4 SV=1	1	1	1	1.6	1.6	1.6	2.4071	37670000	112500000	32158000	20313000	36724000	126890000	78706000	71775000	55217000	31360000	72565000	0	0	0	0	0	0	0	0	0	0	0	0	0	2
tr|A0A1S3Y478|A0A1S3Y478_TOBAC;tr|A0A1S4AV72|A0A1S4AV72_TOBAC	tr|A0A1S3Y478|A0A1S3Y478_TOBAC Coatomer subunit alpha OS=Nicotiana tabacum OX=4097 GN=LOC107771989 PE=4 SV=1;tr|A0A1S4AV72|A0A1S4AV72_TOBAC coatomer subunit alpha-1 OS=Nicotiana tabacum OX=4097 GN=LOC107801629 PE=4 SV=1	50	17	7	52	19	8.1	111.11	1297800000	2959600000	1169400000	949360000	4994900000	3248300000	1673800000	937470000	3070600000	2696000000	3510900000	1646500000	331100000	313610000	391160000	307680000	649390000	418970000	468030000	411680000	356150000	381900000	347460000	448090000	124
tr|A0A1S4AGU3|A0A1S4AGU3_TOBAC;tr|A0A1S3Y492|A0A1S3Y492_TOBAC	tr|A0A1S4AGU3|A0A1S4AGU3_TOBAC protein transport protein Sec61 subunit gamma-1-like OS=Nicotiana tabacum OX=4097 GN=LOC107797518 PE=3 SV=1;tr|A0A1S3Y492|A0A1S3Y492_TOBAC protein transport protein Sec61 subunit gamma-1 OS=Nicotiana tabacum OX=4097 GN=LOC107	2	2	2	23.2	23.2	23.2	21.425	149250000	142460000	97967000	133720000	143290000	166000000	95138000	80903000	140290000	127800000	97699000	120800000	0	0	0	0	0	0	0	0	0	0	0	0	12
tr|A0A1S3Y4D5|A0A1S3Y4D5_TOBAC;tr|A0A1S3Y4C1|A0A1S3Y4C1_TOBAC;tr|A0A1S3Y4B5|A0A1S3Y4B5_TOBAC;tr|A0A1S3ZD74|A0A1S3ZD74_TOBAC;tr|A0A1S3Z019|A0A1S3Z019_TOBAC;tr|A0A1S3Z098|A0A1S3Z098_TOBAC;tr|A0A1S4CEP5|A0A1S4CEP5_TOBAC;tr|A0A1S4CF85|A0A1S4CF85_TOBAC;tr|A0A1S3XTI7|A0A1S3XTI7_TOBAC	tr|A0A1S3Y4D5|A0A1S3Y4D5_TOBAC polyadenylate-binding protein-interacting protein 11-like isoform X3 OS=Nicotiana tabacum OX=4097 GN=LOC107772028 PE=4 SV=1;tr|A0A1S3Y4C1|A0A1S3Y4C1_TOBAC polyadenylate-binding protein-interacting protein 11-like isoform X2 O	2	2	2	7.9	7.9	7.9	7.4739	91454000	179440000	72797000	58553000	140620000	109670000	101960000	41612000	93474000	98205000	124150000	74577000	52496000	52378000	74804000	55125000	0	0	0	0	0	0	43879000	59714000	6
tr|A0A1S4DK26|A0A1S4DK26_TOBAC;tr|A0A1S3Y4D3|A0A1S3Y4D3_TOBAC	tr|A0A1S4DK26|A0A1S4DK26_TOBAC acid phosphatase 1-like OS=Nicotiana tabacum OX=4097 GN=LOC107830619 PE=4 SV=1;tr|A0A1S3Y4D3|A0A1S3Y4D3_TOBAC acid phosphatase 1-like OS=Nicotiana tabacum OX=4097 GN=LOC107772049 PE=4 SV=1	1	1	1	7.8	7.8	7.8	18.176	0	78988000	0	81039000	0	72558000	68247000	0	174860000	0	0	58137000	0	0	0	0	0	0	0	0	0	0	0	0	1
tr|A0A1S3Y4R5|A0A1S3Y4R5_TOBAC	tr|A0A1S3Y4R5|A0A1S3Y4R5_TOBAC premnaspirodiene oxygenase-like OS=Nicotiana tabacum OX=4097 GN=LOC107771914 PE=3 SV=1	1	1	1	2	2	2	4.8558	19506000	0	26070000	17416000	18974000	0	45470000	33995000	21073000	10574000	41553000	12240000	0	0	0	0	0	0	0	0	0	0	0	0	5
tr|A0A1S3Y4T1|A0A1S3Y4T1_TOBAC;tr|A0A1S4CJE8|A0A1S4CJE8_TOBAC;tr|A0A1S3Y4T4|A0A1S3Y4T4_TOBAC	tr|A0A1S3Y4T1|A0A1S3Y4T1_TOBAC uncharacterized protein LOC107772191 isoform X2 OS=Nicotiana tabacum OX=4097 GN=LOC107772191 PE=3 SV=1;tr|A0A1S4CJE8|A0A1S4CJE8_TOBAC uncharacterized protein LOC107819730 OS=Nicotiana tabacum OX=4097 GN=LOC107819730 PE=3 SV=1	1	1	1	2.6	2.6	2.6	2.7502	26621000	0	27106000	0	40110000	40925000	0	0	21897000	72530000	0	0	0	0	0	0	0	0	0	0	0	0	0	0	6
tr|A0A1S3Y4V1|A0A1S3Y4V1_TOBAC	tr|A0A1S3Y4V1|A0A1S3Y4V1_TOBAC guanine nucleotide-binding protein subunit beta-like protein OS=Nicotiana tabacum OX=4097 GN=LOC107772203 PE=3 SV=1	16	16	4	57.7	57.7	15.3	138.03	1687000000	4460400000	1432800000	1551800000	5779700000	6316000000	4657600000	1662900000	4980700000	7303500000	6159500000	2515000000	405300000	573030000	524540000	590650000	1052100000	918030000	1285900000	938320000	870310000	1089600000	788730000	986730000	174
tr|A0A1S4D9U8|A0A1S4D9U8_TOBAC;tr|A0A1S3Y4Y6|A0A1S3Y4Y6_TOBAC;tr|A0A077DBL4|A0A077DBL4_TOBAC;tr|A0A1S4CT76|A0A1S4CT76_TOBAC;tr|A0A1S3Y944|A0A1S3Y944_TOBAC	tr|A0A1S4D9U8|A0A1S4D9U8_TOBAC calnexin homolog 1-like OS=Nicotiana tabacum OX=4097 GN=LOC107827548 PE=3 SV=1;tr|A0A1S3Y4Y6|A0A1S3Y4Y6_TOBAC calnexin homolog 1-like OS=Nicotiana tabacum OX=4097 GN=LOC107772248 PE=3 SV=1;tr|A0A077DBL4|A0A077DBL4_TOBAC Calne	4	4	4	8	8	8	11.535	77289000	217610000	75114000	58956000	127640000	206230000	31973000	46519000	462870000	250690000	334070000	73131000	31741000	84509000	52950000	50353000	37548000	47276000	31414000	66988000	140360000	87060000	84381000	54477000	12
tr|A0A1S3Y4Z6|A0A1S3Y4Z6_TOBAC;tr|A0A1S3Y5Z4|A0A1S3Y5Z4_TOBAC	tr|A0A1S3Y4Z6|A0A1S3Y4Z6_TOBAC histone deacetylase 14-like isoform X2 OS=Nicotiana tabacum OX=4097 GN=LOC107772333 PE=4 SV=1;tr|A0A1S3Y5Z4|A0A1S3Y5Z4_TOBAC histone deacetylase 14-like isoform X1 OS=Nicotiana tabacum OX=4097 GN=LOC107772333 PE=4 SV=1	1	1	1	2.4	2.4	2.4	2.672	0	0	11348000	4869100	69291000	6666200	17943000	0	0	32811000	35841000	0	0	0	0	0	0	0	0	0	0	0	0	0	6
tr|A0A1S4BLI0|A0A1S4BLI0_TOBAC;tr|A0A1S4BLG3|A0A1S4BLG3_TOBAC;tr|A0A1S3YP19|A0A1S3YP19_TOBAC;tr|A0A1S3YGY9|A0A1S3YGY9_TOBAC;tr|A0A1S3Y516|A0A1S3Y516_TOBAC	tr|A0A1S4BLI0|A0A1S4BLI0_TOBAC Serine/threonine-protein phosphatase OS=Nicotiana tabacum OX=4097 GN=LOC107809565 PE=3 SV=1;tr|A0A1S4BLG3|A0A1S4BLG3_TOBAC Serine/threonine-protein phosphatase OS=Nicotiana tabacum OX=4097 GN=LOC107809565 PE=3 SV=1;tr|A0A1S3Y	3	3	3	22	22	22	49.658	181010000	150090000	107190000	68193000	201280000	217070000	71230000	57498000	166530000	121420000	268970000	91191000	90482000	41270000	82349000	54322000	59810000	51526000	0	0	48296000	0	64322000	65318000	14
tr|A0A1S3Y538|A0A1S3Y538_TOBAC	tr|A0A1S3Y538|A0A1S3Y538_TOBAC uncharacterized protein LOC107772033 OS=Nicotiana tabacum OX=4097 GN=LOC107772033 PE=4 SV=1	1	1	1	7.3	7.3	7.3	7.6118	48016000	132720000	18026000	24943000	63374000	0	0	0	115110000	56832000	0	15926000	0	0	0	0	0	0	0	0	0	0	0	0	1
tr|A0A1S3Y546|A0A1S3Y546_TOBAC	tr|A0A1S3Y546|A0A1S3Y546_TOBAC glutathione transferase OS=Nicotiana tabacum OX=4097 GN=LOC107772392 PE=4 SV=1	5	2	1	25.6	11.4	7.8	37.992	89824000	201820000	79092000	102610000	138900000	194230000	69787000	79940000	216290000	275580000	208200000	33268000	76755000	68322000	83826000	100340000	70226000	79036000	67785000	156150000	85380000	85763000	75718000	0	14
tr|A0A1S3Y555|A0A1S3Y555_TOBAC;tr|A0A1S4CNF1|A0A1S4CNF1_TOBAC;tr|A0A1S4DAC4|A0A1S4DAC4_TOBAC;tr|A0A1S3YB70|A0A1S3YB70_TOBAC;tr|A0A1S3ZAW5|A0A1S3ZAW5_TOBAC;tr|A0A1S3ZBD0|A0A1S3ZBD0_TOBAC;tr|A0A1S4DB06|A0A1S4DB06_TOBAC;tr|A0A1S3YAG1|A0A1S3YAG1_TOBAC;tr|A0A1S3YAK5|A0A1S3YAK5_TOBAC;tr|A0A1S4DAJ6|A0A1S4DAJ6_TOBAC;tr|A0A1S4DAH6|A0A1S4DAH6_TOBAC	tr|A0A1S3Y555|A0A1S3Y555_TOBAC mitogen-activated protein kinase kinase kinase kinase 4-like OS=Nicotiana tabacum OX=4097 GN=LOC107772226 PE=4 SV=1;tr|A0A1S4CNF1|A0A1S4CNF1_TOBAC serine/threonine-protein kinase fray1-like OS=Nicotiana tabacum OX=4097 GN=LOC	2	2	2	4.1	4.1	4.1	4.658	7450200	11712000	6953400	0	0	26922000	0	0	0	0	25664000	0	0	0	0	0	0	0	0	0	0	0	0	0	2
tr|A0A1S4D3X5|A0A1S4D3X5_TOBAC;tr|A0A1S4D3R4|A0A1S4D3R4_TOBAC;tr|W8SRK9|W8SRK9_TOBAC;tr|A0A1S3Y577|A0A1S3Y577_TOBAC	tr|A0A1S4D3X5|A0A1S4D3X5_TOBAC Imidazole glycerol phosphate synthase hisHF OS=Nicotiana tabacum OX=4097 GN=LOC107825612 PE=3 SV=1;tr|A0A1S4D3R4|A0A1S4D3R4_TOBAC Imidazole glycerol phosphate synthase hisHF OS=Nicotiana tabacum OX=4097 GN=LOC107825612 PE=3 S	1	1	1	2.2	2.2	2.2	4.4886	0	45351000	0	0	24044000	31683000	0	19291000	47015000	61423000	23286000	16183000	0	0	0	0	0	0	0	0	0	0	0	0	1
tr|A0A1S3Y582|A0A1S3Y582_TOBAC;tr|A0A1S3Y593|A0A1S3Y593_TOBAC;tr|A0A1S3YVK5|A0A1S3YVK5_TOBAC	tr|A0A1S3Y582|A0A1S3Y582_TOBAC uncharacterized protein LOC107772422 isoform X1 OS=Nicotiana tabacum OX=4097 GN=LOC107772422 PE=4 SV=1;tr|A0A1S3Y593|A0A1S3Y593_TOBAC uncharacterized protein LOC107772422 isoform X2 OS=Nicotiana tabacum OX=4097 GN=LOC10777242	2	2	2	19.7	19.7	19.7	97.627	461650000	413940000	213820000	363130000	303550000	602910000	357540000	257400000	394360000	470030000	375690000	279310000	295760000	0	224740000	350360000	132130000	214320000	220150000	294760000	172900000	183530000	132180000	267300000	29
tr|A0A1S3Y5C2|A0A1S3Y5C2_TOBAC;tr|A0A1S4CSG4|A0A1S4CSG4_TOBAC	tr|A0A1S3Y5C2|A0A1S3Y5C2_TOBAC uncharacterized protein LOC107772121 OS=Nicotiana tabacum OX=4097 GN=LOC107772121 PE=3 SV=1;tr|A0A1S4CSG4|A0A1S4CSG4_TOBAC prolyl-tRNA synthetase associated domain-containing protein 1 isoform X2 OS=Nicotiana tabacum OX=4097	3	3	3	10.9	10.9	10.9	35.84	208420000	279670000	59763000	50944000	190820000	212250000	63021000	61931000	203140000	206670000	301240000	70814000	94491000	0	0	0	0	80080000	0	0	98518000	75052000	90492000	89145000	14
tr|A0A1S3Y5H2|A0A1S3Y5H2_TOBAC	tr|A0A1S3Y5H2|A0A1S3Y5H2_TOBAC aspartyl protease family protein 2-like OS=Nicotiana tabacum OX=4097 GN=LOC107772515 PE=3 SV=1	9	1	1	26.7	2.5	2.5	9.187	39653000	118690000	30789000	56040000	76308000	16012000	0	0	60748000	78900000	67795000	32907000	0	0	0	0	0	0	0	0	0	0	0	0	9
tr|A0A1S3Y5P8|A0A1S3Y5P8_TOBAC;tr|A0A1S4A1S6|A0A1S4A1S6_TOBAC	tr|A0A1S3Y5P8|A0A1S3Y5P8_TOBAC serpin-ZX-like OS=Nicotiana tabacum OX=4097 GN=LOC107772383 PE=3 SV=1;tr|A0A1S4A1S6|A0A1S4A1S6_TOBAC serpin-ZX-like OS=Nicotiana tabacum OX=4097 GN=LOC107792798 PE=3 SV=1	5	5	5	16.9	16.9	16.9	22.587	418620000	409220000	290770000	252420000	833200000	626600000	285040000	154090000	404430000	311190000	485070000	205440000	175820000	88383000	162880000	179010000	181600000	114380000	120950000	139060000	122340000	137970000	102630000	160070000	46
tr|A0A1S3Y5X6|A0A1S3Y5X6_TOBAC;tr|A0A1S4D9G3|A0A1S4D9G3_TOBAC	tr|A0A1S3Y5X6|A0A1S3Y5X6_TOBAC mitochondrial import inner membrane translocase subunit TIM23-2-like OS=Nicotiana tabacum OX=4097 GN=LOC107772319 PE=4 SV=1;tr|A0A1S4D9G3|A0A1S4D9G3_TOBAC mitochondrial import inner membrane translocase subunit TIM23-2-like O	4	4	4	41.1	41.1	41.1	71.918	472470000	586390000	368380000	329050000	713780000	604790000	440110000	620140000	500470000	419620000	272040000	257470000	234370000	170870000	237050000	229980000	244280000	155000000	224870000	359250000	163390000	156330000	164090000	244660000	20
tr|A0A1S3ZGD3|A0A1S3ZGD3_TOBAC;tr|A0A1S3Y5Y3|A0A1S3Y5Y3_TOBAC	tr|A0A1S3ZGD3|A0A1S3ZGD3_TOBAC SKP1-like protein OS=Nicotiana tabacum OX=4097 GN=LOC107786549 PE=3 SV=1;tr|A0A1S3Y5Y3|A0A1S3Y5Y3_TOBAC SKP1-like protein OS=Nicotiana tabacum OX=4097 GN=LOC107772501 PE=3 SV=1	3	1	1	30.7	12.4	12.4	7.227	66805000	62523000	40811000	21578000	39523000	72821000	53279000	31562000	116120000	0	48922000	30106000	38554000	18571000	36462000	19874000	14982000	21180000	30293000	34240000	42086000	0	14177000	27067000	17
tr|A0A1S3YK26|A0A1S3YK26_TOBAC;tr|A0A1S3Y6E5|A0A1S3Y6E5_TOBAC	tr|A0A1S3YK26|A0A1S3YK26_TOBAC uncharacterized protein LOC107776877 OS=Nicotiana tabacum OX=4097 GN=LOC107776877 PE=4 SV=1;tr|A0A1S3Y6E5|A0A1S3Y6E5_TOBAC uncharacterized protein LOC107772810 OS=Nicotiana tabacum OX=4097 GN=LOC107772810 PE=4 SV=1	1	1	1	4	4	4	4.7275	20912000	11853000	15062000	7575200	18389000	10563000	22800000	9630700	22594000	0	15132000	11301000	0	0	0	0	0	0	0	0	0	0	0	0	2
tr|A0A1S3Y6I5|A0A1S3Y6I5_TOBAC;tr|A0A1S3Y7L4|A0A1S3Y7L4_TOBAC	tr|A0A1S3Y6I5|A0A1S3Y6I5_TOBAC 8-hydroxygeraniol dehydrogenase-like OS=Nicotiana tabacum OX=4097 GN=LOC107772546 PE=4 SV=1;tr|A0A1S3Y7L4|A0A1S3Y7L4_TOBAC probable mannitol dehydrogenase OS=Nicotiana tabacum OX=4097 GN=LOC107773242 PE=3 SV=1	1	1	1	8.2	8.2	8.2	3.5537	25805000	0	12829000	4768300	16663000	58536000	36778000	15100000	34453000	35644000	32401000	10522000	0	0	0	0	0	0	0	0	0	0	0	0	2
tr|A0A1S3ZDM8|A0A1S3ZDM8_TOBAC;tr|A0A1S3Y6L1|A0A1S3Y6L1_TOBAC	tr|A0A1S3ZDM8|A0A1S3ZDM8_TOBAC dynamin GTPase OS=Nicotiana tabacum OX=4097 GN=LOC107785713 PE=3 SV=1;tr|A0A1S3Y6L1|A0A1S3Y6L1_TOBAC dynamin GTPase OS=Nicotiana tabacum OX=4097 GN=LOC107772803 PE=3 SV=1	12	12	12	18.3	18.3	18.3	117.73	571700000	1270000000	338600000	225430000	609860000	1431100000	430410000	192890000	850050000	823540000	1030300000	206700000	172050000	276620000	177860000	124650000	206440000	221020000	185640000	137590000	166400000	171060000	149540000	111930000	46
tr|A0A1S3Y6S1|A0A1S3Y6S1_TOBAC;tr|A0A1S4D177|A0A1S4D177_TOBAC	tr|A0A1S3Y6S1|A0A1S3Y6S1_TOBAC protein argonaute MEL1-like OS=Nicotiana tabacum OX=4097 GN=LOC107772889 PE=4 SV=1;tr|A0A1S4D177|A0A1S4D177_TOBAC LOW QUALITY PROTEIN: protein argonaute 5 OS=Nicotiana tabacum OX=4097 GN=LOC107824892 PE=3 SV=1	1	1	1	3.6	3.6	3.6	2.2393	0	0	0	0	0	0	0	0	0	0	0	0	0	0	0	0	0	0	0	0	0	0	0	0	1
tr|A0A1S3Y7B0|A0A1S3Y7B0_TOBAC	tr|A0A1S3Y7B0|A0A1S3Y7B0_TOBAC GDSL esterase/lipase At1g29670-like OS=Nicotiana tabacum OX=4097 GN=LOC107773215 PE=3 SV=1	1	1	1	3.1	3.1	3.1	2.5819	17234000	139940000	43313000	0	132690000	113850000	61656000	13161000	0	93985000	148180000	19181000	0	0	0	0	0	0	0	0	0	0	0	0	3
tr|A0A1S3Y7B8|A0A1S3Y7B8_TOBAC;tr|A0A1S4BAT4|A0A1S4BAT4_TOBAC	tr|A0A1S3Y7B8|A0A1S3Y7B8_TOBAC mannose-1-phosphate guanyltransferase alpha-B-like OS=Nicotiana tabacum OX=4097 GN=LOC107773227 PE=4 SV=1;tr|A0A1S4BAT4|A0A1S4BAT4_TOBAC mannose-1-phosphate guanyltransferase alpha-B-like OS=Nicotiana tabacum OX=4097 GN=LOC10	7	7	7	28.2	28.2	28.2	42.441	787620000	1171300000	329420000	367900000	981830000	822280000	431740000	185120000	698300000	843740000	724440000	321410000	305560000	228840000	334430000	326170000	260960000	232980000	228790000	210820000	204110000	257280000	192430000	267600000	41
tr|A0A1S3Y7C7|A0A1S3Y7C7_TOBAC;tr|A0A1S4DQL0|A0A1S4DQL0_TOBAC;tr|A0A1S4D713|A0A1S4D713_TOBAC	tr|A0A1S3Y7C7|A0A1S3Y7C7_TOBAC plastidal glycolate/glycerate translocator 1, chloroplastic-like OS=Nicotiana tabacum OX=4097 GN=LOC107773236 PE=4 SV=1;tr|A0A1S4DQL0|A0A1S4DQL0_TOBAC plastidal glycolate/glycerate translocator 1, chloroplastic-like OS=Nicoti	1	1	1	12.6	12.6	12.6	2.9797	0	0	0	0	0	7862400	3717700	7175100	9034300	0	0	5640700	0	0	0	0	0	0	0	0	0	0	0	0	1
tr|A0A1S3Y7F1|A0A1S3Y7F1_TOBAC	tr|A0A1S3Y7F1|A0A1S3Y7F1_TOBAC 3-isopropylmalate dehydratase large subunit-like OS=Nicotiana tabacum OX=4097 GN=LOC107773264 PE=4 SV=1	1	1	1	7.6	7.6	7.6	3.1634	20160000	0	15566000	12951000	0	62058000	18968000	126280000	31194000	50745000	33814000	14670000	0	0	0	0	0	0	0	0	0	0	0	0	2
tr|A0A1S3Y7I8|A0A1S3Y7I8_TOBAC	tr|A0A1S3Y7I8|A0A1S3Y7I8_TOBAC Phosphoribulokinase OS=Nicotiana tabacum OX=4097 GN=LOC107773234 PE=3 SV=1	8	8	1	32.4	32.4	5.2	111.5	719890000	1628200000	346000000	216340000	502540000	1725000000	260340000	534200000	1907400000	1472800000	2373700000	321770000	165890000	175310000	109680000	105060000	117650000	178050000	76039000	287530000	276900000	183600000	289290000	119370000	43
tr|A0A1S3Y7X2|A0A1S3Y7X2_TOBAC	tr|A0A1S3Y7X2|A0A1S3Y7X2_TOBAC succinate dehydrogenase subunit 5, mitochondrial-like OS=Nicotiana tabacum OX=4097 GN=LOC107773166 PE=4 SV=1	1	1	1	5	5	5	6.9304	30199000	118980000	17013000	16035000	48395000	126730000	57437000	10341000	65369000	67056000	65309000	21979000	0	0	0	0	0	0	0	0	0	0	0	0	2
tr|Q40501|Q40501_TOBAC;tr|A0A1S4C1W2|A0A1S4C1W2_TOBAC;tr|A0A1S3Y838|A0A1S3Y838_TOBAC	tr|Q40501|Q40501_TOBAC 37kDa chloroplast inner envelope membrane polypeptide OS=Nicotiana tabacum OX=4097 PE=2 SV=1;tr|A0A1S4C1W2|A0A1S4C1W2_TOBAC 2-methyl-6-phytyl-1,4-hydroquinone methyltransferase, chloroplastic-like OS=Nicotiana tabacum OX=4097 GN=LOC1	4	4	4	14.6	14.6	14.6	34.449	293560000	496440000	183700000	170250000	349560000	359180000	158880000	111080000	430290000	365790000	377220000	146710000	123250000	101070000	125440000	134300000	94041000	82701000	69205000	112570000	116240000	88638000	81582000	95570000	32
tr|A0A1S3Y892|A0A1S3Y892_TOBAC;tr|A0A1S4CQA0|A0A1S4CQA0_TOBAC	tr|A0A1S3Y892|A0A1S3Y892_TOBAC Pyruvate kinase OS=Nicotiana tabacum OX=4097 GN=LOC107773422 PE=3 SV=1;tr|A0A1S4CQA0|A0A1S4CQA0_TOBAC Pyruvate kinase OS=Nicotiana tabacum OX=4097 GN=LOC107821513 PE=3 SV=1	9	7	7	24.7	20.5	20.5	101.38	176220000	670530000	263970000	156930000	387710000	354630000	148820000	262060000	940390000	935090000	645540000	377990000	72685000	122780000	195570000	153830000	115670000	69766000	97340000	151410000	183890000	149930000	142280000	229310000	32
tr|A0A1S3Y8H3|A0A1S3Y8H3_TOBAC	tr|A0A1S3Y8H3|A0A1S3Y8H3_TOBAC methionine S-methyltransferase OS=Nicotiana tabacum OX=4097 GN=LOC107773392 PE=3 SV=1	36	36	6	49	49	7.8	323.31	6423000000	11162000000	5219200000	4396800000	9342200000	14257000000	9614300000	3788700000	8949000000	7944100000	12452000000	4750600000	1537700000	1403900000	1598700000	1673500000	1497600000	1589600000	1822100000	1566800000	1105200000	1155900000	1424300000	1476500000	440
tr|A0A1S3Y8K6|A0A1S3Y8K6_TOBAC;tr|A0A1S4C805|A0A1S4C805_TOBAC	tr|A0A1S3Y8K6|A0A1S3Y8K6_TOBAC protein MON2 homolog OS=Nicotiana tabacum OX=4097 GN=LOC107773572 PE=3 SV=1;tr|A0A1S4C805|A0A1S4C805_TOBAC protein MON2 homolog OS=Nicotiana tabacum OX=4097 GN=LOC107816080 PE=3 SV=1	1	1	1	1.9	1.9	1.9	5.8896	0	0	0	0	0	0	0	0	0	0	0	0	0	0	0	0	0	0	0	0	0	0	0	0	1
tr|A0A1S3Y8M1|A0A1S3Y8M1_TOBAC;tr|A0A1S4BWW5|A0A1S4BWW5_TOBAC;tr|A0A1S4BWW6|A0A1S4BWW6_TOBAC	tr|A0A1S3Y8M1|A0A1S3Y8M1_TOBAC protein FLUORESCENT IN BLUE LIGHT, chloroplastic-like OS=Nicotiana tabacum OX=4097 GN=LOC107773523 PE=4 SV=1;tr|A0A1S4BWW5|A0A1S4BWW5_TOBAC protein FLUORESCENT IN BLUE LIGHT, chloroplastic-like isoform X2 OS=Nicotiana tabacum	3	3	3	19.2	19.2	19.2	7.6491	109050000	196180000	36488000	32030000	59082000	37276000	19758000	26945000	114270000	67752000	105330000	39795000	0	0	0	0	0	0	0	0	0	0	0	0	4
tr|A0A1S3Y8P2|A0A1S3Y8P2_TOBAC	tr|A0A1S3Y8P2|A0A1S3Y8P2_TOBAC putative late blight resistance protein homolog R1A-10 OS=Nicotiana tabacum OX=4097 GN=LOC107773475 PE=4 SV=1	4	4	4	5.7	5.7	5.7	32.221	100700000	101350000	58789000	21576000	134940000	148890000	125120000	48104000	108740000	90185000	131700000	55548000	37446000	25831000	37142000	0	24816000	30003000	54207000	37694000	26944000	23641000	20149000	27605000	13
tr|A0A1S3Y8Q2|A0A1S3Y8Q2_TOBAC	tr|A0A1S3Y8Q2|A0A1S3Y8Q2_TOBAC Chlorophyll a-b binding protein, chloroplastic OS=Nicotiana tabacum OX=4097 GN=LOC107773487 PE=3 SV=1	8	1	1	67.3	13.2	13.2	2.4698	0	0	0	0	0	0	0	0	0	8394600000	0	0	0	0	0	0	0	0	0	0	0	0	0	0	1
tr|A0A1S3Y8Q8|A0A1S3Y8Q8_TOBAC;tr|A0A0S0N4U0|A0A0S0N4U0_TOBAC	tr|A0A1S3Y8Q8|A0A1S3Y8Q8_TOBAC Tubulin alpha chain OS=Nicotiana tabacum OX=4097 GN=LOC107773558 PE=3 SV=1;tr|A0A0S0N4U0|A0A0S0N4U0_TOBAC Tubulin alpha chain OS=Nicotiana tabacum OX=4097 GN=TUA5 PE=2 SV=1	17	3	3	46.1	11.1	11.1	101.95	1359700000	1108000000	627520000	559280000	1569200000	2498700000	2059100000	688230000	1926000000	2141800000	1399200000	987290000	934590000	295400000	612730000	605000000	637150000	800410000	1347400000	972270000	750360000	758370000	459800000	1080600000	41
tr|A0A1S4D915|A0A1S4D915_TOBAC;tr|A0A1S3Y943|A0A1S3Y943_TOBAC	tr|A0A1S4D915|A0A1S4D915_TOBAC target of Myb protein 1-like OS=Nicotiana tabacum OX=4097 GN=LOC107827293 PE=3 SV=1;tr|A0A1S3Y943|A0A1S3Y943_TOBAC target of Myb protein 1-like OS=Nicotiana tabacum OX=4097 GN=LOC107773767 PE=3 SV=1	1	1	1	2.1	2.1	2.1	4.3443	16837000	23318000	30406000	7388500	21944000	35517000	31798000	20456000	29268000	25569000	22431000	18662000	0	0	0	0	0	0	0	0	0	0	0	0	12
tr|A0A1S3Y949|A0A1S3Y949_TOBAC;tr|A0A1S4DGF0|A0A1S4DGF0_TOBAC	tr|A0A1S3Y949|A0A1S3Y949_TOBAC 40S ribosomal protein S19-3 OS=Nicotiana tabacum OX=4097 GN=LOC107773605 PE=3 SV=1;tr|A0A1S4DGF0|A0A1S4DGF0_TOBAC 40S ribosomal protein S19-3-like OS=Nicotiana tabacum OX=4097 GN=LOC107829198 PE=3 SV=1	4	4	0	28.7	28.7	0	56.893	852780000	1108200000	1781500000	1585200000	852430000	1357200000	1243900000	549430000	684910000	300620000	2460200000	1255700000	659800000	352140000	1034400000	923950000	482010000	574660000	511190000	804960000	347240000	370840000	414110000	831230000	51
tr|A0A1S3Y974|A0A1S3Y974_TOBAC;tr|A0A1S3Y820|A0A1S3Y820_TOBAC;sp|P27495|CB24_TOBAC	tr|A0A1S3Y974|A0A1S3Y974_TOBAC Chlorophyll a-b binding protein, chloroplastic OS=Nicotiana tabacum OX=4097 GN=LOC107773808 PE=3 SV=1;tr|A0A1S3Y820|A0A1S3Y820_TOBAC Chlorophyll a-b binding protein, chloroplastic OS=Nicotiana tabacum OX=4097 GN=LOC107773232	11	1	0	79.4	13.1	0	14.863	19003000000	15738000000	10926000000	10392000000	9173300000	11538000000	8275700000	15170000000	15560000000	12055000000	3954200000	11189000000	14234000000	6952800000	12556000000	13556000000	4825300000	5411400000	6716500000	22087000000	9487400000	6145400000	0	12413000000	58
tr|A0A1S3Y9E9|A0A1S3Y9E9_TOBAC;tr|A0A1S4D3Y8|A0A1S4D3Y8_TOBAC;tr|A0A1S4ASM7|A0A1S4ASM7_TOBAC;tr|A0A1S3YQG6|A0A1S3YQG6_TOBAC	tr|A0A1S3Y9E9|A0A1S3Y9E9_TOBAC Aspartate aminotransferase OS=Nicotiana tabacum OX=4097 GN=LOC107773771 PE=3 SV=1;tr|A0A1S4D3Y8|A0A1S4D3Y8_TOBAC Aspartate aminotransferase OS=Nicotiana tabacum OX=4097 GN=LOC107825707 PE=3 SV=1;tr|A0A1S4ASM7|A0A1S4ASM7_TOBAC	7	7	6	18.1	18.1	16.1	72.116	225770000	457510000	130620000	92256000	393270000	658500000	195730000	91765000	262810000	396610000	578560000	130340000	90244000	97540000	29996000	74919000	109990000	153910000	90364000	92796000	73663000	106140000	125250000	76405000	30
tr|A0A1S4AQA0|A0A1S4AQA0_TOBAC;tr|A0A1S3Y9H8|A0A1S3Y9H8_TOBAC	tr|A0A1S4AQA0|A0A1S4AQA0_TOBAC 116 kDa U5 small nuclear ribonucleoprotein component-like OS=Nicotiana tabacum OX=4097 GN=LOC107800224 PE=3 SV=1;tr|A0A1S3Y9H8|A0A1S3Y9H8_TOBAC 116 kDa U5 small nuclear ribonucleoprotein component-like OS=Nicotiana tabacum OX	6	6	6	7.3	7.3	7.3	18.771	84621000	442620000	209980000	155360000	143040000	254040000	202740000	137220000	222580000	255900000	270520000	191830000	74293000	94412000	126240000	103200000	59704000	67848000	91497000	97218000	66962000	77830000	68333000	166660000	20
tr|A0A1S3Y9M0|A0A1S3Y9M0_TOBAC	tr|A0A1S3Y9M0|A0A1S3Y9M0_TOBAC diacylglycerol kinase OS=Nicotiana tabacum OX=4097 GN=LOC107773804 PE=3 SV=1	8	8	8	26.8	26.8	26.8	70.568	380720000	879850000	304300000	273250000	658650000	584250000	215910000	133750000	406830000	589100000	381260000	115810000	120830000	187440000	142860000	152070000	125690000	110090000	101090000	110790000	105070000	90085000	79406000	101780000	48
tr|A0A1S3Y9P0|A0A1S3Y9P0_TOBAC;tr|A0A1S4AQ32|A0A1S4AQ32_TOBAC	tr|A0A1S3Y9P0|A0A1S3Y9P0_TOBAC 14 kDa zinc-binding protein-like OS=Nicotiana tabacum OX=4097 GN=LOC107773830 PE=4 SV=1;tr|A0A1S4AQ32|A0A1S4AQ32_TOBAC 14 kDa zinc-binding protein-like OS=Nicotiana tabacum OX=4097 GN=LOC107800041 PE=4 SV=1	2	2	2	28.5	28.5	28.5	5.2184	0	0	0	0	46652000	77053000	30941000	0	29267000	339240000	128950000	26912000	0	0	0	0	0	0	0	0	0	0	0	0	0
tr|A0A1S3Y9T1|A0A1S3Y9T1_TOBAC;tr|A0A1S4CU65|A0A1S4CU65_TOBAC	tr|A0A1S3Y9T1|A0A1S3Y9T1_TOBAC uncharacterized protein At5g39570-like OS=Nicotiana tabacum OX=4097 GN=LOC107774073 PE=4 SV=1;tr|A0A1S4CU65|A0A1S4CU65_TOBAC uncharacterized protein At5g39570-like OS=Nicotiana tabacum OX=4097 GN=LOC107822630 PE=4 SV=1	2	2	2	13.1	13.1	13.1	11.487	0	219560000	16877000	12061000	50609000	86881000	16709000	14168000	90303000	150090000	218280000	10581000	0	74610000	0	0	0	32746000	6831700	7389700	44194000	49119000	85598000	0	10
tr|A0A1S4D601|A0A1S4D601_TOBAC;tr|A0A1S4D5T3|A0A1S4D5T3_TOBAC;tr|A0A1S4B7N6|A0A1S4B7N6_TOBAC;tr|A0A1S3Y9Y3|A0A1S3Y9Y3_TOBAC	tr|A0A1S4D601|A0A1S4D601_TOBAC probable alpha,alpha-trehalose-phosphate synthase [UDP-forming] 11 isoform X2 OS=Nicotiana tabacum OX=4097 GN=LOC107826322 PE=3 SV=1;tr|A0A1S4D5T3|A0A1S4D5T3_TOBAC probable alpha,alpha-trehalose-phosphate synthase [UDP-formin	2	1	1	2.4	1.4	1.4	2.665	10581000	83920000	9609900	8679200	62470000	71752000	14077000	5734600	26703000	55667000	52886000	13096000	0	0	0	0	0	0	0	0	0	0	0	0	3
tr|A0A1S3YAB5|A0A1S3YAB5_TOBAC	tr|A0A1S3YAB5|A0A1S3YAB5_TOBAC GDSL esterase/lipase At1g29670-like OS=Nicotiana tabacum OX=4097 GN=LOC107774023 PE=3 SV=1	1	1	1	6	6	6	4.0619	62711000	82659000	48704000	35367000	101530000	132680000	76748000	66086000	59070000	187650000	174780000	25516000	0	0	0	0	0	0	0	0	0	0	0	0	12
tr|A0A1S4DN51|A0A1S4DN51_TOBAC;tr|A0A1S3YAC1|A0A1S3YAC1_TOBAC	tr|A0A1S4DN51|A0A1S4DN51_TOBAC Ribosomal protein L37 OS=Nicotiana tabacum OX=4097 GN=LOC107831585 PE=3 SV=1;tr|A0A1S3YAC1|A0A1S3YAC1_TOBAC Ribosomal protein L37 OS=Nicotiana tabacum OX=4097 GN=LOC107774203 PE=3 SV=1	1	1	1	7.4	7.4	7.4	2.345	0	0	7802100	0	0	89441000	39600000	0	0	0	0	0	0	0	0	0	0	0	0	0	0	0	0	0	1
tr|A0A1S3YAN6|A0A1S3YAN6_TOBAC;tr|A0A1S4CZJ7|A0A1S4CZJ7_TOBAC	tr|A0A1S3YAN6|A0A1S3YAN6_TOBAC COBW domain-containing protein 1-like OS=Nicotiana tabacum OX=4097 GN=LOC107774293 PE=3 SV=1;tr|A0A1S4CZJ7|A0A1S4CZJ7_TOBAC COBW domain-containing protein 1-like OS=Nicotiana tabacum OX=4097 GN=LOC107824330 PE=3 SV=1	7	7	7	22.8	22.8	22.8	68.45	689460000	1572600000	295700000	364670000	1221400000	1308500000	588540000	331620000	966460000	1243600000	1427800000	340680000	280740000	236940000	177030000	202480000	162760000	205190000	170650000	154450000	264630000	318660000	255200000	231770000	38
tr|A0A1S3ZAT9|A0A1S3ZAT9_TOBAC;tr|A0A1S3YAR6|A0A1S3YAR6_TOBAC	tr|A0A1S3ZAT9|A0A1S3ZAT9_TOBAC AP-4 complex subunit mu-like OS=Nicotiana tabacum OX=4097 GN=LOC107784896 PE=3 SV=1;tr|A0A1S3YAR6|A0A1S3YAR6_TOBAC AP-4 complex subunit mu OS=Nicotiana tabacum OX=4097 GN=LOC107774321 PE=3 SV=1	2	2	2	4.4	4.4	4.4	5.5774	95230000	135810000	54275000	52751000	107890000	139700000	29440000	15915000	55296000	128030000	130150000	39448000	0	0	0	0	0	0	0	0	0	0	0	0	3
tr|A0A1S3ZUI2|A0A1S3ZUI2_TOBAC;tr|A0A1S3YAU3|A0A1S3YAU3_TOBAC;tr|A0A1S3YMX8|A0A1S3YMX8_TOBAC;tr|A0A1S3YC69|A0A1S3YC69_TOBAC	tr|A0A1S3ZUI2|A0A1S3ZUI2_TOBAC Acyl-[acyl-carrier-protein] desaturase OS=Nicotiana tabacum OX=4097 GN=LOC107790638 PE=3 SV=1;tr|A0A1S3YAU3|A0A1S3YAU3_TOBAC Acyl-[acyl-carrier-protein] desaturase OS=Nicotiana tabacum OX=4097 GN=LOC107774170 PE=3 SV=1;tr|A0A	1	1	1	3.1	3.1	3.1	6.1047	54028000	0	0	39594000	0	55969000	43044000	50452000	124400000	66172000	53661000	0	0	0	0	0	0	0	0	0	0	0	0	0	7
tr|A0A1S3YAU5|A0A1S3YAU5_TOBAC;tr|A0A1S3YCQ6|A0A1S3YCQ6_TOBAC;tr|A0A1S4DBA5|A0A1S4DBA5_TOBAC;tr|A0A1S4D6G1|A0A1S4D6G1_TOBAC;tr|A0A1S3Y197|A0A1S3Y197_TOBAC	tr|A0A1S3YAU5|A0A1S3YAU5_TOBAC 60S ribosomal protein L32-1-like OS=Nicotiana tabacum OX=4097 GN=LOC107774355 PE=3 SV=1;tr|A0A1S3YCQ6|A0A1S3YCQ6_TOBAC 60S ribosomal protein L32-1-like OS=Nicotiana tabacum OX=4097 GN=LOC107774850 PE=3 SV=1;tr|A0A1S4DBA5|A0A1	3	1	1	30.8	8.3	8.3	3.6506	21121000	31916000	18140000	0	49840000	120000000	30805000	21034000	52283000	63672000	118250000	17685000	0	0	0	0	0	0	0	0	0	0	0	0	15
tr|A0A1S3YAU9|A0A1S3YAU9_TOBAC;tr|Q0PWS7|Q0PWS7_TOBAC;tr|A0A1S4AKK6|A0A1S4AKK6_TOBAC	tr|A0A1S3YAU9|A0A1S3YAU9_TOBAC Chlorophyll a-b binding protein, chloroplastic OS=Nicotiana tabacum OX=4097 GN=LOC107774251 PE=3 SV=1;tr|Q0PWS7|Q0PWS7_TOBAC Chlorophyll a-b binding protein, chloroplastic OS=Nicotiana tabacum OX=4097 GN=Lhcb4 PE=2 SV=1;tr|A0	15	15	15	54.6	54.6	54.6	323.31	49402000000	45282000000	20704000000	18933000000	21294000000	50876000000	26746000000	31911000000	34452000000	34729000000	37698000000	21721000000	9133800000	4846100000	6514300000	6471900000	2959800000	4603200000	4452500000	9069700000	4430400000	4502700000	3657000000	5338600000	353
tr|A0A1S3YBN6|A0A1S3YBN6_TOBAC;tr|A0A1S3YBP7|A0A1S3YBP7_TOBAC;tr|A0A1S3YAZ2|A0A1S3YAZ2_TOBAC;tr|A0A1S3YB31|A0A1S3YB31_TOBAC	tr|A0A1S3YBN6|A0A1S3YBN6_TOBAC chaperone protein ClpD, chloroplastic-like isoform X4 OS=Nicotiana tabacum OX=4097 GN=LOC107774412 PE=3 SV=1;tr|A0A1S3YBP7|A0A1S3YBP7_TOBAC chaperone protein ClpD, chloroplastic-like isoform X3 OS=Nicotiana tabacum OX=4097 GN	10	10	3	15.5	15.5	3.9	111.34	775240000	870150000	457980000	444160000	1185300000	1625500000	641590000	524450000	1582200000	924610000	1284400000	827360000	298980000	138690000	222720000	206980000	266420000	217030000	186430000	216680000	245110000	158780000	185200000	302640000	63
tr|A0A1S4CPM3|A0A1S4CPM3_TOBAC;tr|A0A1S3YAZ4|A0A1S3YAZ4_TOBAC	tr|A0A1S4CPM3|A0A1S4CPM3_TOBAC Beta-adaptin-like protein OS=Nicotiana tabacum OX=4097 GN=LOC107821274 PE=3 SV=1;tr|A0A1S3YAZ4|A0A1S3YAZ4_TOBAC Beta-adaptin-like protein OS=Nicotiana tabacum OX=4097 GN=LOC107774205 PE=3 SV=1	3	3	3	5.7	5.7	5.7	17.915	121290000	117830000	16133000	0	132500000	192940000	77910000	16956000	150970000	215740000	209170000	98104000	68078000	47474000	0	0	0	54687000	53696000	0	47756000	63353000	53096000	51278000	5
tr|A0A1S3ZU32|A0A1S3ZU32_TOBAC;tr|A0A1S3YB66|A0A1S3YB66_TOBAC	tr|A0A1S3ZU32|A0A1S3ZU32_TOBAC 28 kDa ribonucleoprotein, chloroplastic OS=Nicotiana tabacum OX=4097 GN=LOC107790472 PE=4 SV=1;tr|A0A1S3YB66|A0A1S3YB66_TOBAC 28 kDa ribonucleoprotein, chloroplastic-like OS=Nicotiana tabacum OX=4097 GN=LOC107774439 PE=4 SV=1	2	2	2	16.6	16.6	16.6	23.098	76444000	94431000	67078000	21048000	0	139740000	40158000	57079000	176370000	111380000	145980000	95023000	44567000	29192000	56057000	0	0	47879000	0	0	76517000	37831000	43502000	100610000	11
tr|A0A1S3YBC5|A0A1S3YBC5_TOBAC	tr|A0A1S3YBC5|A0A1S3YBC5_TOBAC zinc finger MYM-type protein 1-like OS=Nicotiana tabacum OX=4097 GN=LOC107774482 PE=4 SV=1	1	1	1	5.6	5.6	5.6	-2	447660000	0	480130000	241490000	1010800000	1474400000	946090000	661920000	931980000	0	0	1149500000	0	0	0	0	0	0	0	0	0	0	0	0	1
tr|A0A1S3YBH4|A0A1S3YBH4_TOBAC;tr|A0A1S3Z434|A0A1S3Z434_TOBAC	tr|A0A1S3YBH4|A0A1S3YBH4_TOBAC cytochrome P450 CYP736A12-like OS=Nicotiana tabacum OX=4097 GN=LOC107774525 PE=3 SV=1;tr|A0A1S3Z434|A0A1S3Z434_TOBAC cytochrome P450 CYP736A12-like OS=Nicotiana tabacum OX=4097 GN=LOC107782783 PE=3 SV=1	1	1	1	8.1	8.1	8.1	15.404	62623000	62095000	59003000	39278000	69869000	123470000	94165000	65241000	112720000	88396000	96734000	67315000	0	0	0	0	0	0	0	0	0	0	0	0	8
tr|A0A1S3YBI7|A0A1S3YBI7_TOBAC;tr|A0A1S4A194|A0A1S4A194_TOBAC;tr|A0A1S4ASX4|A0A1S4ASX4_TOBAC	tr|A0A1S3YBI7|A0A1S3YBI7_TOBAC inorganic diphosphatase OS=Nicotiana tabacum OX=4097 GN=LOC107774375 PE=3 SV=1;tr|A0A1S4A194|A0A1S4A194_TOBAC inorganic diphosphatase OS=Nicotiana tabacum OX=4097 GN=LOC107792725 PE=3 SV=1;tr|A0A1S4ASX4|A0A1S4ASX4_TOBAC inorg	2	2	2	7.6	7.6	7.6	3.6503	17114000	92646000	18266000	21640000	32736000	61033000	14339000	79590000	70008000	117010000	172770000	21111000	0	0	0	0	0	0	0	0	0	0	0	0	6
tr|A0A1S3YBJ9|A0A1S3YBJ9_TOBAC	tr|A0A1S3YBJ9|A0A1S3YBJ9_TOBAC U6 snRNA-associated Sm-like protein LSm8 OS=Nicotiana tabacum OX=4097 GN=LOC107774569 PE=3 SV=1	1	1	1	22.4	22.4	22.4	46.837	27087000	39435000	37134000	33094000	26706000	44978000	42043000	33976000	67153000	45322000	77318000	0	13497000	0	37310000	35504000	0	12056000	26102000	39613000	19904000	12799000	18731000	0	13
tr|A0A1S3YBQ2|A0A1S3YBQ2_TOBAC;tr|Q8LRN5|Q8LRN5_TOBAC;tr|Q8RVJ9|Q8RVJ9_TOBAC	tr|A0A1S3YBQ2|A0A1S3YBQ2_TOBAC respiratory burst oxidase homolog protein C OS=Nicotiana tabacum OX=4097 GN=LOC107774415 PE=3 SV=1;tr|Q8LRN5|Q8LRN5_TOBAC NADPH oxidase OS=Nicotiana tabacum OX=4097 GN=rbohD PE=2 SV=1;tr|Q8RVJ9|Q8RVJ9_TOBAC NADPH oxidase OS=N	2	2	2	2.8	2.8	2.8	6.9631	144520000	122730000	72772000	73075000	124120000	141790000	72923000	48020000	85269000	127040000	109360000	44532000	83585000	0	67033000	70809000	57809000	53925000	43648000	61249000	0	42687000	48003000	51278000	8
tr|A7XAQ5|A7XAQ5_TOBAC;tr|A0A1S4ALJ9|A0A1S4ALJ9_TOBAC;tr|A0A1S3YBU5|A0A1S3YBU5_TOBAC	tr|A7XAQ5|A7XAQ5_TOBAC Glucose-1-phosphate adenylyltransferase OS=Nicotiana tabacum OX=4097 GN=AGP PE=2 SV=1;tr|A0A1S4ALJ9|A0A1S4ALJ9_TOBAC Glucose-1-phosphate adenylyltransferase OS=Nicotiana tabacum OX=4097 GN=LOC107798981 PE=3 SV=1;tr|A0A1S3YBU5|A0A1S3Y	7	7	7	15.2	15.2	15.2	27.363	627670000	801330000	321510000	304300000	975150000	1101300000	722770000	155160000	878110000	1193300000	1267200000	276410000	248690000	445440000	260610000	314690000	334660000	316460000	347420000	203820000	275040000	360650000	371610000	351540000	34
tr|A0A1S3ZQ26|A0A1S3ZQ26_TOBAC;tr|A0A1S3Z8L6|A0A1S3Z8L6_TOBAC;tr|A0A1S3YI66|A0A1S3YI66_TOBAC;tr|A0A1S4D8V2|A0A1S4D8V2_TOBAC;tr|A0A1S4D738|A0A1S4D738_TOBAC;tr|A0A1S3YBZ4|A0A1S3YBZ4_TOBAC;tr|A0A1S4D8M0|A0A1S4D8M0_TOBAC;tr|A0A1S4D7D5|A0A1S4D7D5_TOBAC	tr|A0A1S3ZQ26|A0A1S3ZQ26_TOBAC polyadenylate-binding protein RBP45-like OS=Nicotiana tabacum OX=4097 GN=LOC107789104 PE=4 SV=1;tr|A0A1S3Z8L6|A0A1S3Z8L6_TOBAC polyadenylate-binding protein RBP45-like OS=Nicotiana tabacum OX=4097 GN=LOC107784011 PE=4 SV=1;tr	1	1	1	2.3	2.3	2.3	8.2089	10193000	202790000	26419000	21966000	60279000	63519000	34170000	647340	89475000	67484000	69640000	8349100	0	0	0	0	0	0	0	0	0	0	0	0	10
tr|A0A1S3YC29|A0A1S3YC29_TOBAC;tr|A0A1S3YN46|A0A1S3YN46_TOBAC	tr|A0A1S3YC29|A0A1S3YC29_TOBAC LOW QUALITY PROTEIN: protein transport protein SEC31 homolog B-like OS=Nicotiana tabacum OX=4097 GN=LOC107774522 PE=3 SV=1;tr|A0A1S3YN46|A0A1S3YN46_TOBAC protein transport protein SEC31 homolog B-like OS=Nicotiana tabacum OX=	6	6	6	5.8	5.8	5.8	22.485	70121000	93257000	31448000	45728000	243900000	392100000	187060000	104280000	195690000	261510000	93729000	122900000	51817000	0	49489000	44685000	41822000	50602000	74571000	73788000	47135000	53397000	50600000	52937000	18
tr|A0A1S3YC31|A0A1S3YC31_TOBAC;tr|A0A1S3YD80|A0A1S3YD80_TOBAC	tr|A0A1S3YC31|A0A1S3YC31_TOBAC probable E3 ubiquitin-protein ligase RNF217 OS=Nicotiana tabacum OX=4097 GN=LOC107774701 PE=3 SV=1;tr|A0A1S3YD80|A0A1S3YD80_TOBAC probable E3 ubiquitin-protein ligase RNF217 OS=Nicotiana tabacum OX=4097 GN=LOC107774939 PE=3 S	2	2	1	7.3	7.3	3.4	4.5509	41570000	137320000	32951000	22314000	93982000	115560000	41949000	24978000	81625000	134390000	152560000	45158000	46120000	0	47238000	0	0	40988000	0	0	0	57875000	59173000	50826000	7
tr|W8SGD9|W8SGD9_TOBAC;tr|A0A1S4DFD6|A0A1S4DFD6_TOBAC;tr|A0A1S3YCA3|A0A1S3YCA3_TOBAC	tr|W8SGD9|W8SGD9_TOBAC 2-C-methyl-D-erythritol 2,4-cyclodiphosphate synthase OS=Nicotiana tabacum OX=4097 PE=2 SV=1;tr|A0A1S4DFD6|A0A1S4DFD6_TOBAC 2-C-methyl-D-erythritol 2,4-cyclodiphosphate synthase OS=Nicotiana tabacum OX=4097 GN=LOC107829217 PE=3 SV=1;	2	2	2	21.6	21.6	21.6	5.7744	162870000	136060000	83847000	60796000	178050000	256200000	101830000	54627000	129250000	201380000	32837000	100900000	0	0	0	0	0	58274000	0	124600000	0	0	0	0	5
tr|A0A1S3ZM06|A0A1S3ZM06_TOBAC;tr|A0A1S3YCB3|A0A1S3YCB3_TOBAC	tr|A0A1S3ZM06|A0A1S3ZM06_TOBAC CpSecY OS=Nicotiana tabacum OX=4097 GN=LOC107788151 PE=3 SV=1;tr|A0A1S3YCB3|A0A1S3YCB3_TOBAC CpSecY OS=Nicotiana tabacum OX=4097 GN=LOC107774575 PE=3 SV=1	2	2	2	3.1	3.1	3.1	4.9497	20592000	19365000	9383800	9300000	23275000	77924000	0	0	0	18040000	0	0	0	0	0	0	0	0	0	0	0	0	0	0	2
tr|A0A1S3ZHH0|A0A1S3ZHH0_TOBAC;tr|A0A1S3YCF0|A0A1S3YCF0_TOBAC	tr|A0A1S3ZHH0|A0A1S3ZHH0_TOBAC 23 kDa subunit of oxygen evolving system of photosystem II OS=Nicotiana tabacum OX=4097 GN=LOC107786772 PE=3 SV=1;tr|A0A1S3YCF0|A0A1S3YCF0_TOBAC 23 kDa subunit of oxygen evolving system of photosystem II OS=Nicotiana tabacum	2	2	2	10.1	10.1	10.1	10.369	65832000	43866000	31723000	57180000	72681000	146740000	85900000	30934000	0	99315000	123220000	35892000	0	0	0	0	0	0	0	0	0	0	0	0	7
tr|A0A1S4CF99|A0A1S4CF99_TOBAC;tr|A0A1S3YCF3|A0A1S3YCF3_TOBAC	tr|A0A1S4CF99|A0A1S4CF99_TOBAC DAG protein, chloroplastic-like OS=Nicotiana tabacum OX=4097 GN=LOC107818361 PE=4 SV=1;tr|A0A1S3YCF3|A0A1S3YCF3_TOBAC DAG protein, chloroplastic-like OS=Nicotiana tabacum OX=4097 GN=LOC107774603 PE=4 SV=1	1	1	1	7.5	7.5	7.5	6.6239	116040000	0	112970000	122580000	82184000	100010000	83852000	80870000	83827000	94976000	103150000	76531000	0	0	0	0	0	0	0	0	0	0	0	0	10
tr|A0A1S3YCH9|A0A1S3YCH9_TOBAC;tr|A0A1S3YMU4|A0A1S3YMU4_TOBAC;tr|A0A1S3YLU7|A0A1S3YLU7_TOBAC;tr|A0A1S3YLU2|A0A1S3YLU2_TOBAC;tr|A0A1S3YLS5|A0A1S3YLS5_TOBAC	tr|A0A1S3YCH9|A0A1S3YCH9_TOBAC (S)-2-hydroxy-acid oxidase OS=Nicotiana tabacum OX=4097 GN=LOC107774718 PE=3 SV=1;tr|A0A1S3YMU4|A0A1S3YMU4_TOBAC (S)-2-hydroxy-acid oxidase OS=Nicotiana tabacum OX=4097 GN=LOC107777659 PE=3 SV=1;tr|A0A1S3YLU7|A0A1S3YLU7_TOBAC	7	1	1	24.7	8.2	8.2	3.4885	26802000	0	12638000	19428000	0	17180000	87192000	23843000	0	0	0	0	0	0	0	0	0	0	0	0	0	0	0	0	0
tr|A0A1S3YCI5|A0A1S3YCI5_TOBAC;tr|A0A1S3YSW6|A0A1S3YSW6_TOBAC	tr|A0A1S3YCI5|A0A1S3YCI5_TOBAC heat shock 70 kDa protein, mitochondrial OS=Nicotiana tabacum OX=4097 GN=LOC107774811 PE=3 SV=1;tr|A0A1S3YSW6|A0A1S3YSW6_TOBAC heat shock 70 kDa protein, mitochondrial-like OS=Nicotiana tabacum OX=4097 GN=LOC107779402 PE=4 SV	16	2	2	29.7	3.1	3.1	11.523	230910000	55974000	149300000	136950000	334410000	470010000	30606000	83065000	445930000	483220000	427680000	111940000	0	0	297020000	51400000	168760000	276070000	0	0	252420000	259450000	194450000	184180000	19
tr|A0A1S3YCM0|A0A1S3YCM0_TOBAC	tr|A0A1S3YCM0|A0A1S3YCM0_TOBAC zingipain-2-like OS=Nicotiana tabacum OX=4097 GN=LOC107774651 PE=3 SV=1	3	3	3	13.5	13.5	13.5	61.424	243110000	84193000	126120000	67789000	230020000	324800000	145350000	177530000	184000000	221200000	287650000	150140000	113140000	0	71138000	53300000	64346000	74673000	96567000	158180000	53197000	53218000	69551000	99071000	18
tr|A0A1S4AQN0|A0A1S4AQN0_TOBAC;tr|A0A1S3YCU5|A0A1S3YCU5_TOBAC	tr|A0A1S4AQN0|A0A1S4AQN0_TOBAC transmembrane emp24 domain-containing protein p24beta3-like OS=Nicotiana tabacum OX=4097 GN=LOC107800409 PE=3 SV=1;tr|A0A1S3YCU5|A0A1S3YCU5_TOBAC transmembrane emp24 domain-containing protein p24beta3-like OS=Nicotiana tabacu	2	2	2	11.9	11.9	11.9	16.058	168270000	414690000	71369000	82976000	0	195030000	109430000	24262000	184020000	154100000	138100000	40315000	98286000	286910000	0	103830000	0	0	0	0	72020000	0	0	0	8
tr|A0A1S3YD17|A0A1S3YD17_TOBAC;tr|A0A1S3YDF1|A0A1S3YDF1_TOBAC	tr|A0A1S3YD17|A0A1S3YD17_TOBAC putative G3BP-like protein isoform X2 OS=Nicotiana tabacum OX=4097 GN=LOC107774881 PE=4 SV=1;tr|A0A1S3YDF1|A0A1S3YDF1_TOBAC putative G3BP-like protein isoform X1 OS=Nicotiana tabacum OX=4097 GN=LOC107774881 PE=4 SV=1	11	4	3	29.7	16.8	14.3	155.9	10460000000	12352000000	5811900000	5949100000	13091000000	15945000000	9984700000	5025500000	7854100000	9020300000	9507600000	4419200000	3435000000	1606600000	3505100000	3435900000	3586200000	3499700000	4103100000	3745100000	2127200000	1853100000	1974400000	2643200000	102
tr|A0A1S3YD75|A0A1S3YD75_TOBAC;tr|Q40481|Q40481_TOBAC	tr|A0A1S3YD75|A0A1S3YD75_TOBAC Chlorophyll a-b binding protein, chloroplastic OS=Nicotiana tabacum OX=4097 GN=LOC107774933 PE=3 SV=1;tr|Q40481|Q40481_TOBAC Chlorophyll a-b binding protein, chloroplastic (Fragment) OS=Nicotiana tabacum OX=4097 GN=Cab4 PE=2	10	1	1	69.3	11.2	11.2	15.328	1973100000	1749800000	1567500000	1213700000	1778600000	1714600000	1392600000	1299300000	1762500000	1700900000	1785100000	1432800000	1028000000	496370000	993530000	1073100000	621240000	469600000	773810000	1249200000	544430000	448560000	465670000	1215200000	133
tr|A0A1S3YD84|A0A1S3YD84_TOBAC	tr|A0A1S3YD84|A0A1S3YD84_TOBAC Calcium-transporting ATPase OS=Nicotiana tabacum OX=4097 GN=LOC107774818 PE=3 SV=1	1	1	1	1.1	1.1	1.1	2.2608	0	33316000	8904800	8633300	0	0	0	0	0	0	0	0	0	0	0	0	0	0	0	0	0	0	0	0	4
tr|A0A1S3YDP0|A0A1S3YDP0_TOBAC;tr|A0A1S4AWT9|A0A1S4AWT9_TOBAC	tr|A0A1S3YDP0|A0A1S3YDP0_TOBAC Tubulin beta chain OS=Nicotiana tabacum OX=4097 GN=LOC107775153 PE=3 SV=1;tr|A0A1S4AWT9|A0A1S4AWT9_TOBAC Tubulin beta chain OS=Nicotiana tabacum OX=4097 GN=LOC107802214 PE=3 SV=1	24	1	1	71.1	2.5	2.5	-2	15767000	29330000	4878900	8718000	62397000	68673000	37775000	0	0	63685000	43763000	0	0	0	0	0	0	0	0	0	0	0	0	0	3
tr|A0A1S4CR54|A0A1S4CR54_TOBAC;tr|A0A1S3Z6M9|A0A1S3Z6M9_TOBAC;tr|A0A1S3YDU6|A0A1S3YDU6_TOBAC	tr|A0A1S4CR54|A0A1S4CR54_TOBAC photosystem I reaction center subunit VI-1, chloroplastic-like OS=Nicotiana tabacum OX=4097 GN=LOC107821676 PE=3 SV=1;tr|A0A1S3Z6M9|A0A1S3Z6M9_TOBAC photosystem I reaction center subunit VI-1, chloroplastic-like OS=Nicotiana	4	4	1	48.3	48.3	22.8	75.567	2278000000	1987200000	1252700000	925150000	1194900000	2647900000	922020000	3008200000	4017300000	3854200000	2559400000	1783400000	1344000000	645050000	921080000	1154400000	643130000	670400000	690740000	2130900000	1140800000	973360000	724480000	1375600000	47
tr|A0A1S3YDV3|A0A1S3YDV3_TOBAC	tr|A0A1S3YDV3|A0A1S3YDV3_TOBAC methionine S-methyltransferase OS=Nicotiana tabacum OX=4097 GN=LOC107775022 PE=3 SV=1	33	3	3	43.1	1.9	1.9	40.827	59963000	598790000	65582000	61191000	242130000	271210000	162110000	42514000	141390000	312080000	372250000	46058000	30754000	147050000	67348000	75938000	76641000	75186000	74617000	49082000	51369000	80687000	94572000	36850000	27
tr|A0A1S3YE47|A0A1S3YE47_TOBAC;tr|A0A1S3ZNT6|A0A1S3ZNT6_TOBAC;tr|A0A1S4CVL5|A0A1S4CVL5_TOBAC;tr|A0A1S4CVZ1|A0A1S4CVZ1_TOBAC;tr|A0A1S4AL91|A0A1S4AL91_TOBAC	tr|A0A1S3YE47|A0A1S3YE47_TOBAC tropinone reductase-like 3 OS=Nicotiana tabacum OX=4097 GN=LOC107775270 PE=4 SV=1;tr|A0A1S3ZNT6|A0A1S3ZNT6_TOBAC tropinone reductase-like 3 OS=Nicotiana tabacum OX=4097 GN=LOC107788737 PE=4 SV=1;tr|A0A1S4CVL5|A0A1S4CVL5_TOBAC	4	4	4	16.7	16.7	16.7	14.582	171860000	285840000	56864000	46128000	272180000	419040000	228250000	81643000	297450000	356660000	566110000	111310000	76673000	102930000	101860000	85782000	95838000	101630000	83665000	76955000	95191000	114220000	114870000	84918000	23
tr|A0A1S4CKJ4|A0A1S4CKJ4_TOBAC;tr|A0A1S3YE60|A0A1S3YE60_TOBAC	tr|A0A1S4CKJ4|A0A1S4CKJ4_TOBAC L-ascorbate peroxidase 3, peroxisomal OS=Nicotiana tabacum OX=4097 GN=LOC107819788 PE=3 SV=1;tr|A0A1S3YE60|A0A1S3YE60_TOBAC L-ascorbate peroxidase 3, peroxisomal-like OS=Nicotiana tabacum OX=4097 GN=LOC107775122 PE=3 SV=1	2	2	2	12.2	12.2	12.2	2.3648	10092000000	10042000000	8900000000	7570200000	13029000000	11429000000	6545600000	2387900000	10462000000	11944000000	14954000000	5488700000	0	0	0	0	0	0	0	0	6938700000	6489000000	7093900000	0	3
tr|A0A1S3YE85|A0A1S3YE85_TOBAC;tr|A0A1S4AI50|A0A1S4AI50_TOBAC	tr|A0A1S3YE85|A0A1S3YE85_TOBAC Mitochondrial-processing peptidase subunit alpha OS=Nicotiana tabacum OX=4097 GN=LOC107775304 PE=3 SV=1;tr|A0A1S4AI50|A0A1S4AI50_TOBAC Mitochondrial-processing peptidase subunit alpha OS=Nicotiana tabacum OX=4097 GN=LOC107797	5	5	5	12.1	12.1	12.1	17.028	59982000	158100000	19096000	55240000	131860000	210690000	89448000	49678000	282330000	195500000	275930000	51411000	27124000	34754000	0	52442000	27794000	28854000	33342000	40748000	62533000	31271000	42853000	21497000	15
tr|A0A1S3YEB3|A0A1S3YEB3_TOBAC;tr|A0A1S3YDM5|A0A1S3YDM5_TOBAC	tr|A0A1S3YEB3|A0A1S3YEB3_TOBAC Chlorophyll a-b binding protein, chloroplastic OS=Nicotiana tabacum OX=4097 GN=LOC107775375 PE=3 SV=1;tr|A0A1S3YDM5|A0A1S3YDM5_TOBAC Chlorophyll a-b binding protein, chloroplastic OS=Nicotiana tabacum OX=4097 GN=LOC107774945	4	4	4	16.6	16.6	16.6	14.423	90630000	97901000	45272000	55652000	281900000	262430000	132450000	72834000	40032000	165430000	132950000	63480000	58513000	0	63827000	23188000	111570000	67137000	65692000	52960000	32670000	56412000	41888000	41558000	22
tr|A0A1S3ZBB2|A0A1S3ZBB2_TOBAC;tr|A0A1S3YEI6|A0A1S3YEI6_TOBAC	tr|A0A1S3ZBB2|A0A1S3ZBB2_TOBAC D-xylose-proton symporter-like 3, chloroplastic OS=Nicotiana tabacum OX=4097 GN=LOC107784981 PE=3 SV=1;tr|A0A1S3YEI6|A0A1S3YEI6_TOBAC D-xylose-proton symporter-like 3, chloroplastic isoform X1 OS=Nicotiana tabacum OX=4097 GN=	1	1	1	1.8	1.8	1.8	2.7951	59330000	456180000	39269000	33084000	83439000	459100000	0	60329000	65462000	67343000	131530000	16807000	0	0	0	0	0	0	0	0	0	0	0	0	4
tr|A0A1S4D5T7|A0A1S4D5T7_TOBAC;tr|A0A1S3YES2|A0A1S3YES2_TOBAC;tr|A0A1S4A1D3|A0A1S4A1D3_TOBAC;tr|A0A1S4A121|A0A1S4A121_TOBAC	tr|A0A1S4D5T7|A0A1S4D5T7_TOBAC AP-2 complex subunit alpha OS=Nicotiana tabacum OX=4097 GN=LOC107826292 PE=3 SV=1;tr|A0A1S3YES2|A0A1S3YES2_TOBAC AP-2 complex subunit alpha OS=Nicotiana tabacum OX=4097 GN=LOC107775474 PE=3 SV=1;tr|A0A1S4A1D3|A0A1S4A1D3_TOBAC	1	1	1	0.8	0.8	0.8	3.2269	27007000	53294000	12103000	9974200	34549000	53674000	36876000	11398000	58026000	46478000	40401000	19693000	0	0	0	0	0	0	0	0	0	0	0	0	2
tr|A0A1S3Z4X0|A0A1S3Z4X0_TOBAC;tr|A0A1S3YES4|A0A1S3YES4_TOBAC;tr|A0A1S4DLP6|A0A1S4DLP6_TOBAC;tr|A0A1S3ZSF4|A0A1S3ZSF4_TOBAC;tr|A0A1S3Z2C4|A0A1S3Z2C4_TOBAC;tr|A0A1S4AXL3|A0A1S4AXL3_TOBAC;tr|A0A1S4BN71|A0A1S4BN71_TOBAC	tr|A0A1S3Z4X0|A0A1S3Z4X0_TOBAC splicing factor U2af small subunit B-like OS=Nicotiana tabacum OX=4097 GN=LOC107782838 PE=4 SV=1;tr|A0A1S3YES4|A0A1S3YES4_TOBAC splicing factor U2af small subunit B-like OS=Nicotiana tabacum OX=4097 GN=LOC107775509 PE=4 SV=1;	3	3	3	11.5	11.5	11.5	10.54	47816000	264060000	71215000	59999000	108460000	100520000	79166000	51865000	155170000	120340000	228130000	56177000	0	82589000	0	0	0	34633000	47142000	46957000	0	38527000	81873000	43509000	13
tr|A0A1S3YEX0|A0A1S3YEX0_TOBAC;tr|A0A076KWG9|A0A076KWG9_TOBAC;tr|A0A1S3YT31|A0A1S3YT31_TOBAC;tr|A0A1S4CJD5|A0A1S4CJD5_TOBAC;tr|A0A1S4C882|A0A1S4C882_TOBAC	tr|A0A1S3YEX0|A0A1S3YEX0_TOBAC sedoheptulose-1,7-bisphosphatase, chloroplastic-like OS=Nicotiana tabacum OX=4097 GN=LOC107775549 PE=3 SV=1;tr|A0A076KWG9|A0A076KWG9_TOBAC Chloroplast sedoheptulose-1,7-bisphosphatase OS=Nicotiana tabacum OX=4097 PE=2 SV=1;tr	6	6	6	17.3	17.3	17.3	26.678	856580000	1078100000	502810000	565850000	532030000	1227700000	602510000	666950000	1148800000	1201500000	1292500000	614490000	563360000	428070000	444110000	567830000	268580000	406740000	476330000	899640000	611430000	667720000	575310000	648950000	36
tr|A0A1S3YF09|A0A1S3YF09_TOBAC;tr|A0A1S4BA72|A0A1S4BA72_TOBAC	tr|A0A1S3YF09|A0A1S3YF09_TOBAC RING-type E3 ubiquitin transferase OS=Nicotiana tabacum OX=4097 GN=LOC107775515 PE=4 SV=1;tr|A0A1S4BA72|A0A1S4BA72_TOBAC RING-type E3 ubiquitin transferase OS=Nicotiana tabacum OX=4097 GN=LOC107806158 PE=4 SV=1	2	2	2	1.2	1.2	1.2	9.3183	0	135230000	35318000	26568000	184110000	144630000	82830000	54600000	43114000	115440000	57100000	39845000	0	0	0	0	72701000	0	92591000	80363000	0	67858000	0	0	4
tr|A0A1S4D6P0|A0A1S4D6P0_TOBAC;tr|A0A1S4D6J2|A0A1S4D6J2_TOBAC;tr|A0A1S3YF27|A0A1S3YF27_TOBAC;tr|A0A1S4AWF6|A0A1S4AWF6_TOBAC;tr|A0A1S4AWX0|A0A1S4AWX0_TOBAC	tr|A0A1S4D6P0|A0A1S4D6P0_TOBAC Pectin acetylesterase OS=Nicotiana tabacum OX=4097 GN=LOC107826495 PE=3 SV=1;tr|A0A1S4D6J2|A0A1S4D6J2_TOBAC Pectin acetylesterase OS=Nicotiana tabacum OX=4097 GN=LOC107826495 PE=3 SV=1;tr|A0A1S3YF27|A0A1S3YF27_TOBAC Pectin ac	2	1	1	7	4.7	4.7	3.6481	4885800	21970000	0	356500	15003000	22128000	7793700	616920	11363000	15892000	15019000	0	0	0	0	0	0	0	0	0	0	0	0	0	5
tr|A0A1S4CTH1|A0A1S4CTH1_TOBAC;tr|A0A1S3YF61|A0A1S3YF61_TOBAC	tr|A0A1S4CTH1|A0A1S4CTH1_TOBAC uncharacterized protein LOC107822389 OS=Nicotiana tabacum OX=4097 GN=LOC107822389 PE=4 SV=1;tr|A0A1S3YF61|A0A1S3YF61_TOBAC uncharacterized protein LOC107775567 OS=Nicotiana tabacum OX=4097 GN=LOC107775567 PE=4 SV=1	7	7	7	29.3	29.3	29.3	26.956	669190000	926850000	388210000	464560000	1182900000	1107000000	711670000	497700000	957870000	1431200000	1029100000	839340000	210920000	178010000	196460000	195790000	231270000	206830000	254840000	238810000	213100000	231160000	162180000	409730000	45
tr|A0A1S4C6N4|A0A1S4C6N4_TOBAC;tr|A0A1S4C691|A0A1S4C691_TOBAC;tr|A0A1S3YF87|A0A1S3YF87_TOBAC	tr|A0A1S4C6N4|A0A1S4C6N4_TOBAC intron-binding protein aquarius-like isoform X2 OS=Nicotiana tabacum OX=4097 GN=LOC107815634 PE=3 SV=1;tr|A0A1S4C691|A0A1S4C691_TOBAC intron-binding protein aquarius-like isoform X1 OS=Nicotiana tabacum OX=4097 GN=LOC10781563	2	2	2	2.3	2.3	2.3	7.0216	0	97991000	56301000	17368000	72862000	0	0	18593000	0	0	69343000	18196000	0	0	0	0	0	0	0	0	0	0	0	0	2
tr|A0A1S4CI53|A0A1S4CI53_TOBAC;tr|A0A1S3YFI0|A0A1S3YFI0_TOBAC	tr|A0A1S4CI53|A0A1S4CI53_TOBAC uncharacterized protein LOC107819301 OS=Nicotiana tabacum OX=4097 GN=LOC107819301 PE=4 SV=1;tr|A0A1S3YFI0|A0A1S3YFI0_TOBAC uncharacterized protein LOC107775616 OS=Nicotiana tabacum OX=4097 GN=LOC107775616 PE=4 SV=1	1	1	1	2.6	2.6	2.6	3.4726	27205000	41965000	0	16683000	35016000	36555000	37261000	19755000	26525000	44806000	52193000	15391000	0	0	0	0	0	0	0	0	0	0	0	0	10
tr|A0A1S3YFI6|A0A1S3YFI6_TOBAC	tr|A0A1S3YFI6|A0A1S3YFI6_TOBAC Coatomer subunit alpha OS=Nicotiana tabacum OX=4097 GN=LOC107775546 PE=4 SV=1	56	56	3	61.7	61.7	3.7	323.31	12907000000	20944000000	11156000000	9888600000	39537000000	29897000000	15573000000	7546800000	20948000000	22912000000	25235000000	11736000000	1688200000	1546600000	1850300000	1831500000	3357700000	1921000000	1839800000	1728500000	1493100000	1624200000	1742500000	2011800000	664
tr|A0A3G1E3S8|A0A3G1E3S8_TOBAC;tr|A0A1S4B047|A0A1S4B047_TOBAC;tr|A0A1S3YFP1|A0A1S3YFP1_TOBAC	tr|A0A3G1E3S8|A0A3G1E3S8_TOBAC 3-oxoacyl-[acyl-carrier-protein] synthase OS=Nicotiana tabacum OX=4097 PE=2 SV=1;tr|A0A1S4B047|A0A1S4B047_TOBAC 3-oxoacyl-[acyl-carrier-protein] synthase OS=Nicotiana tabacum OX=4097 GN=LOC107803192 PE=3 SV=1;tr|A0A1S3YFP1|A0	10	10	7	30	30	22.5	105.87	1922200000	3244000000	997120000	1126500000	3033600000	4835200000	2070400000	1090700000	2546700000	3459500000	3968500000	1357200000	969090000	1103400000	834220000	1210600000	1124900000	1068400000	937980000	1302700000	785650000	887860000	932620000	1165600000	104
tr|A0A1S3ZPV3|A0A1S3ZPV3_TOBAC;tr|A0A1S3YFR7|A0A1S3YFR7_TOBAC	tr|A0A1S3ZPV3|A0A1S3ZPV3_TOBAC Sucrose synthase OS=Nicotiana tabacum OX=4097 GN=LOC107789131 PE=3 SV=1;tr|A0A1S3YFR7|A0A1S3YFR7_TOBAC Sucrose synthase OS=Nicotiana tabacum OX=4097 GN=LOC107775654 PE=3 SV=1	7	7	2	12.5	12.5	4.7	32.279	191430000	307430000	48696000	29848000	333250000	676630000	236710000	174610000	429320000	521060000	544550000	219750000	64375000	76104000	38575000	37807000	62183000	79856000	75321000	95428000	93209000	64928000	100170000	75152000	25
tr|A0A1S3YFW2|A0A1S3YFW2_TOBAC;tr|A0A1S4DLA0|A0A1S4DLA0_TOBAC;tr|A0A1S4CTD4|A0A1S4CTD4_TOBAC;tr|A0A1S4CML0|A0A1S4CML0_TOBAC;tr|A0A1S3YXG7|A0A1S3YXG7_TOBAC;tr|A0A1S4CTP0|A0A1S4CTP0_TOBAC	tr|A0A1S3YFW2|A0A1S3YFW2_TOBAC 60S ribosomal protein L35-like OS=Nicotiana tabacum OX=4097 GN=LOC107775827 PE=3 SV=1;tr|A0A1S4DLA0|A0A1S4DLA0_TOBAC 60S ribosomal protein L35-like OS=Nicotiana tabacum OX=4097 GN=LOC107830981 PE=3 SV=1;tr|A0A1S4CTD4|A0A1S4CT	3	1	1	19.8	8.6	8.6	2.7716	0	0	0	0	0	164170000	45771000	12940000	0	35086000	0	0	0	0	0	0	0	0	0	0	0	0	0	0	3
tr|A0A1S3YGA2|A0A1S3YGA2_TOBAC;tr|A0A1S4BDS5|A0A1S4BDS5_TOBAC	tr|A0A1S3YGA2|A0A1S3YGA2_TOBAC ER membrane protein complex subunit 8/9 homolog OS=Nicotiana tabacum OX=4097 GN=LOC107775949 PE=3 SV=1;tr|A0A1S4BDS5|A0A1S4BDS5_TOBAC ER membrane protein complex subunit 8/9 homolog OS=Nicotiana tabacum OX=4097 GN=LOC10780715	1	1	1	7.1	7.1	7.1	3.17	21660000	0	29074000	14626000	41678000	120830000	51248000	16632000	31685000	28569000	33938000	17499000	0	0	0	0	0	0	0	0	0	0	0	0	4
tr|A0A1S4AE78|A0A1S4AE78_TOBAC;tr|A0A1S3YGA8|A0A1S3YGA8_TOBAC	tr|A0A1S4AE78|A0A1S4AE78_TOBAC protein FLX-like 1 OS=Nicotiana tabacum OX=4097 GN=LOC107796708 PE=3 SV=1;tr|A0A1S3YGA8|A0A1S3YGA8_TOBAC protein FLX-like 1 OS=Nicotiana tabacum OX=4097 GN=LOC107775813 PE=3 SV=1	1	1	1	3.8	3.8	3.8	2.6928	14159000	0	6839500	7927100	29435000	12104000	0	0	0	0	33051000	0	0	0	0	0	0	0	0	0	0	0	0	0	2
tr|A0A1S3YGC0|A0A1S3YGC0_TOBAC	tr|A0A1S3YGC0|A0A1S3YGC0_TOBAC NF-X1-type zinc finger protein NFXL1 OS=Nicotiana tabacum OX=4097 GN=LOC107775885 PE=3 SV=1	1	1	1	2.9	2.9	2.9	34.255	75449000	72107000	78389000	33551000	39276000	108460000	94773000	52211000	102800000	40963000	61239000	31565000	0	0	0	0	0	0	0	0	0	0	0	0	9
tr|A0A1S3YGN1|A0A1S3YGN1_TOBAC;tr|A0A1S4AIB2|A0A1S4AIB2_TOBAC	tr|A0A1S3YGN1|A0A1S3YGN1_TOBAC protein BOBBER 1-like OS=Nicotiana tabacum OX=4097 GN=LOC107775992 PE=4 SV=1;tr|A0A1S4AIB2|A0A1S4AIB2_TOBAC protein BOBBER 1-like OS=Nicotiana tabacum OX=4097 GN=LOC107798015 PE=4 SV=1	1	1	1	7	7	7	28.022	28147000	36148000	22401000	17131000	18067000	32046000	19622000	30081000	50706000	32544000	54587000	21861000	20753000	16186000	21557000	19904000	6025000	15340000	16371000	29728000	21581000	16041000	18841000	21653000	13
tr|A0A1S3YGP6|A0A1S3YGP6_TOBAC	tr|A0A1S3YGP6|A0A1S3YGP6_TOBAC asparagine--tRNA ligase OS=Nicotiana tabacum OX=4097 GN=LOC107776004 PE=3 SV=1	1	1	1	2.8	2.8	2.8	20.102	0	0	0	0	0	0	0	0	71631000	0	45633000	0	0	0	0	0	0	0	0	0	0	0	0	0	1
tr|A0A1S3ZI08|A0A1S3ZI08_TOBAC;tr|A0A1S3YGR9|A0A1S3YGR9_TOBAC	tr|A0A1S3ZI08|A0A1S3ZI08_TOBAC Malate dehydrogenase OS=Nicotiana tabacum OX=4097 GN=LOC107787080 PE=3 SV=1;tr|A0A1S3YGR9|A0A1S3YGR9_TOBAC Malate dehydrogenase OS=Nicotiana tabacum OX=4097 GN=LOC107775935 PE=3 SV=1	2	1	1	7.3	3.4	3.4	4.1751	47780000	64168000	0	22891000	69304000	80577000	0	0	0	0	0	0	0	0	0	0	0	0	0	0	0	0	0	0	2
tr|Q08196|Q08196_TOBAC;tr|A0A1S3YGS8|A0A1S3YGS8_TOBAC;tr|Q7DLN2|Q7DLN2_TOBAC;tr|Q08194|Q08194_TOBAC;tr|Q08198|Q08198_TOBAC;tr|Q08195|Q08195_TOBAC;tr|A0A1S4CVJ0|A0A1S4CVJ0_TOBAC	tr|Q08196|Q08196_TOBAC Cysteine-rich extensin-like protein-3 OS=Nicotiana tabacum OX=4097 GN=LOC107787895 PE=2 SV=1;tr|A0A1S3YGS8|A0A1S3YGS8_TOBAC keratinocyte proline-rich protein-like OS=Nicotiana tabacum OX=4097 GN=LOC107776111 PE=4 SV=1;tr|Q7DLN2|Q7DLN	2	2	2	12.1	12.1	12.1	5.5624	78054000	175300000	49064000	39880000	89827000	360850000	98405000	42076000	71494000	94830000	145680000	24492000	56589000	59870000	60380000	53353000	36786000	89552000	0	0	37758000	34110000	55612000	27215000	11
tr|A0A1S3YGW3|A0A1S3YGW3_TOBAC;tr|A0A1S3Y8G8|A0A1S3Y8G8_TOBAC	tr|A0A1S3YGW3|A0A1S3YGW3_TOBAC annexin D4-like OS=Nicotiana tabacum OX=4097 GN=LOC107775984 PE=4 SV=1;tr|A0A1S3Y8G8|A0A1S3Y8G8_TOBAC annexin D4-like OS=Nicotiana tabacum OX=4097 GN=LOC107773388 PE=4 SV=1	8	8	7	29.7	29.7	26.5	77.676	383010000	1253500000	386970000	237600000	439360000	624350000	327960000	126180000	200500000	142810000	225860000	32579000	71350000	123380000	177080000	101920000	62765000	91837000	82960000	44545000	37778000	28112000	51617000	24910000	42
tr|A0A1S3YGZ0|A0A1S3YGZ0_TOBAC;tr|A0A1S3ZSV9|A0A1S3ZSV9_TOBAC	tr|A0A1S3YGZ0|A0A1S3YGZ0_TOBAC heat shock 70 kDa protein, mitochondrial OS=Nicotiana tabacum OX=4097 GN=LOC107775921 PE=3 SV=1;tr|A0A1S3ZSV9|A0A1S3ZSV9_TOBAC heat shock 70 kDa protein, mitochondrial OS=Nicotiana tabacum OX=4097 GN=LOC107790051 PE=4 SV=1	21	19	7	39.1	37.4	12.5	269.79	8489900000	11066000000	4240600000	3140200000	7395100000	9034200000	5114700000	3082400000	9231300000	8223100000	11013000000	4097400000	2130800000	1454800000	1880500000	1813100000	1664300000	1353100000	1443700000	1168300000	1419500000	1585700000	1389200000	1536900000	260
tr|A0A1S3YHC5|A0A1S3YHC5_TOBAC	tr|A0A1S3YHC5|A0A1S3YHC5_TOBAC FAD-dependent urate hydroxylase-like OS=Nicotiana tabacum OX=4097 GN=LOC107776301 PE=3 SV=1	4	4	1	8.1	8.1	2	15.986	150700000	643940000	49941000	28270000	125080000	189440000	67333000	48530000	73222000	208270000	249930000	34457000	61733000	130580000	50015000	42358000	61522000	41270000	46891000	45765000	43605000	53501000	79726000	40174000	8
tr|A0A1S3YHI6|A0A1S3YHI6_TOBAC	tr|A0A1S3YHI6|A0A1S3YHI6_TOBAC GATA type zinc finger protein asd-4-like OS=Nicotiana tabacum OX=4097 GN=LOC107776224 PE=4 SV=1	3	1	1	23.7	10.9	10.9	5.7379	0	0	0	0	0	0	0	0	0	88326000	0	0	0	0	0	0	0	0	0	0	0	0	0	0	1
tr|A0A1S3YHK3|A0A1S3YHK3_TOBAC;tr|A0A1S3ZJY4|A0A1S3ZJY4_TOBAC;tr|A0A1S3Z039|A0A1S3Z039_TOBAC;tr|A0A1S4ANL0|A0A1S4ANL0_TOBAC	tr|A0A1S3YHK3|A0A1S3YHK3_TOBAC ATP citrate synthase OS=Nicotiana tabacum OX=4097 GN=LOC107776338 PE=3 SV=1;tr|A0A1S3ZJY4|A0A1S3ZJY4_TOBAC ATP citrate synthase OS=Nicotiana tabacum OX=4097 GN=LOC107787579 PE=4 SV=1;tr|A0A1S3Z039|A0A1S3Z039_TOBAC ATP citrate	2	1	1	6.6	4.3	4.3	4.6144	57367000	34152000	43088000	29159000	56539000	0	59064000	29991000	55551000	54104000	50926000	30735000	0	0	0	0	0	0	0	0	0	0	0	0	2
tr|A0A1S3YHV0|A0A1S3YHV0_TOBAC	tr|A0A1S3YHV0|A0A1S3YHV0_TOBAC abscisic acid 8-hydroxylase 4-like OS=Nicotiana tabacum OX=4097 GN=LOC107776450 PE=3 SV=1	1	1	1	2.4	2.4	2.4	8.371	358460000	654160000	220630000	296940000	386890000	169470000	286140000	94963000	341910000	323530000	392070000	249270000	0	0	0	0	0	0	0	0	0	0	0	0	26
tr|A0A1S3YI12|A0A1S3YI12_TOBAC;tr|A0A1S3Z812|A0A1S3Z812_TOBAC	tr|A0A1S3YI12|A0A1S3YI12_TOBAC brefeldin A-inhibited guanine nucleotide-exchange protein 1-like OS=Nicotiana tabacum OX=4097 GN=LOC107776500 PE=4 SV=1;tr|A0A1S3Z812|A0A1S3Z812_TOBAC LOW QUALITY PROTEIN: brefeldin A-inhibited guanine nucleotide-exchange pro	1	1	1	1	1	1	3.646	13597000	0	0	0	0	20927000	16489000	0	20620000	0	26091000	8730400	0	0	0	0	0	0	0	0	0	0	0	0	4
tr|A0A1S3YI67|A0A1S3YI67_TOBAC;tr|A0A1S4C912|A0A1S4C912_TOBAC	tr|A0A1S3YI67|A0A1S3YI67_TOBAC putative cytochrome c oxidase subunit 5b-like OS=Nicotiana tabacum OX=4097 GN=LOC107776274 PE=4 SV=1;tr|A0A1S4C912|A0A1S4C912_TOBAC putative cytochrome c oxidase subunit 5b-like OS=Nicotiana tabacum OX=4097 GN=LOC107816417 PE	1	1	1	13.1	13.1	13.1	3.9116	113700000	0	0	0	150790000	194000000	102230000	82772000	225260000	0	161270000	0	0	0	0	0	0	0	0	0	0	0	0	0	2
tr|C5J0G6|C5J0G6_TOBAC;tr|A0A1S3ZZL0|A0A1S3ZZL0_TOBAC;tr|A0A1S3YIG1|A0A1S3YIG1_TOBAC;tr|A0A1S4BCN3|A0A1S4BCN3_TOBAC	tr|C5J0G6|C5J0G6_TOBAC phosphopyruvate hydratase OS=Nicotiana tabacum OX=4097 PE=2 SV=1;tr|A0A1S3ZZL0|A0A1S3ZZL0_TOBAC phosphopyruvate hydratase OS=Nicotiana tabacum OX=4097 GN=LOC107792078 PE=3 SV=1;tr|A0A1S3YIG1|A0A1S3YIG1_TOBAC phosphopyruvate hydratase	7	7	7	24.8	24.8	24.8	77.066	440810000	1984900000	61971000	183420000	322450000	1477600000	592650000	455430000	2279600000	1748300000	3423800000	590430000	279040000	385100000	379190000	565450000	270450000	457130000	323620000	487340000	894750000	636800000	539750000	529330000	32
tr|A0A1S4BE26|A0A1S4BE26_TOBAC;tr|A0A1S3YIH2|A0A1S3YIH2_TOBAC	tr|A0A1S4BE26|A0A1S4BE26_TOBAC probable ATP synthase 24 kDa subunit, mitochondrial OS=Nicotiana tabacum OX=4097 GN=LOC107807235 PE=4 SV=1;tr|A0A1S3YIH2|A0A1S3YIH2_TOBAC probable ATP synthase 24 kDa subunit, mitochondrial OS=Nicotiana tabacum OX=4097 GN=LOC	6	6	6	26	26	26	18.836	258100000	426910000	17587000	68875000	441270000	654960000	323700000	38842000	1220400000	600620000	944240000	23808000	115410000	123840000	0	142680000	161780000	304310000	192130000	151400000	329030000	168120000	277150000	125210000	14
tr|A0A1S3YIU8|A0A1S3YIU8_TOBAC;tr|Q93X32|Q93X32_TOBAC	tr|A0A1S3YIU8|A0A1S3YIU8_TOBAC Proteasome subunit beta OS=Nicotiana tabacum OX=4097 GN=LOC107776568 PE=3 SV=1;tr|Q93X32|Q93X32_TOBAC Proteasome subunit beta (Fragment) OS=Nicotiana tabacum OX=4097 GN=b4 PE=2 SV=1	3	3	3	17.6	17.6	17.6	6.5767	206690000	305780000	143830000	150520000	314790000	388910000	139140000	69956000	327620000	409550000	404100000	146770000	0	85869000	0	132400000	171310000	118410000	107880000	66902000	114550000	137000000	122250000	126080000	13
tr|A0A1S4CTF6|A0A1S4CTF6_TOBAC;tr|A0A1S4CG61|A0A1S4CG61_TOBAC;tr|A0A1S3YIW7|A0A1S3YIW7_TOBAC;tr|A0A1S4DII6|A0A1S4DII6_TOBAC;tr|A0A1S4C6N2|A0A1S4C6N2_TOBAC;tr|A0A1S4BHQ8|A0A1S4BHQ8_TOBAC;tr|A0A1S3YUT7|A0A1S3YUT7_TOBAC	tr|A0A1S4CTF6|A0A1S4CTF6_TOBAC ras-related protein RABH1e-like OS=Nicotiana tabacum OX=4097 GN=LOC107822377 PE=4 SV=1;tr|A0A1S4CG61|A0A1S4CG61_TOBAC ras-related protein RABH1e-like OS=Nicotiana tabacum OX=4097 GN=LOC107818583 PE=4 SV=1;tr|A0A1S3YIW7|A0A1S3	1	1	1	5.3	5.3	5.3	3.4462	209620000	262190000	78927000	84587000	328330000	0	49889000	15846000	434040000	304930000	507020000	124860000	0	0	0	0	0	0	0	0	0	0	0	0	10
tr|A0A1S3ZZ87|A0A1S3ZZ87_TOBAC;tr|A0A1S3YJB8|A0A1S3YJB8_TOBAC;tr|A0A1S3YIY4|A0A1S3YIY4_TOBAC	tr|A0A1S3ZZ87|A0A1S3ZZ87_TOBAC Ubiquitin carboxyl-terminal hydrolase OS=Nicotiana tabacum OX=4097 GN=LOC107792007 PE=3 SV=1;tr|A0A1S3YJB8|A0A1S3YJB8_TOBAC Ubiquitin carboxyl-terminal hydrolase OS=Nicotiana tabacum OX=4097 GN=LOC107776789 PE=3 SV=1;tr|A0A1S	2	2	2	5.4	5.4	5.4	12.488	51809000	48946000	13449000	11948000	46043000	42254000	16769000	10183000	74130000	88344000	122420000	17018000	26707000	0	0	0	20674000	0	0	0	25558000	26490000	37550000	0	5
tr|A0A1S3YJ63|A0A1S3YJ63_TOBAC;tr|A0A1S4BGT7|A0A1S4BGT7_TOBAC;tr|A0A1S4A2F0|A0A1S4A2F0_TOBAC;tr|A0A1S4B027|A0A1S4B027_TOBAC;tr|A0A1S4A2I4|A0A1S4A2I4_TOBAC;tr|A0A1S4A4X8|A0A1S4A4X8_TOBAC;tr|A0A1S4BWH5|A0A1S4BWH5_TOBAC;tr|A0A1S4A269|A0A1S4A269_TOBAC;tr|A0A1S4A509|A0A1S4A509_TOBAC;tr|A0A1S4BWQ3|A0A1S4BWQ3_TOBAC;tr|A0A1S4B066|A0A1S4B066_TOBAC;tr|A0A1S4BGT0|A0A1S4BGT0_TOBAC;tr|A0A1S4BWE6|A0A1S4BWE6_TO…	tr|A0A1S3YJ63|A0A1S3YJ63_TOBAC topless-related protein 3-like OS=Nicotiana tabacum OX=4097 GN=LOC107776850 PE=4 SV=1;tr|A0A1S4BGT7|A0A1S4BGT7_TOBAC topless-related protein 4-like isoform X1 OS=Nicotiana tabacum OX=4097 GN=LOC107808117 PE=4 SV=1;tr|A0A1S4A2	1	1	1	1.1	1.1	1.1	2.3653	0	0	0	0	0	0	0	0	0	0	0	0	0	0	0	0	0	0	0	0	0	0	0	0	2
tr|A0A1S3ZAS9|A0A1S3ZAS9_TOBAC;tr|A0A1S4CAW0|A0A1S4CAW0_TOBAC;tr|A0A1S4CBD6|A0A1S4CBD6_TOBAC;tr|A0A1S4CAL1|A0A1S4CAL1_TOBAC;tr|A0A1S4BDN2|A0A1S4BDN2_TOBAC;tr|A0A1S3YJE7|A0A1S3YJE7_TOBAC	tr|A0A1S3ZAS9|A0A1S3ZAS9_TOBAC CBL-interacting protein kinase 32-like OS=Nicotiana tabacum OX=4097 GN=LOC107784888 PE=3 SV=1;tr|A0A1S4CAW0|A0A1S4CAW0_TOBAC CBL-interacting serine/threonine-protein kinase 3-like isoform X3 OS=Nicotiana tabacum OX=4097 GN=LO	1	1	1	8.3	8.3	8.3	2.9184	0	107700000	27009000	15639000	46979000	85848000	0	0	54569000	73732000	0	18978000	0	0	0	0	0	0	0	0	0	0	0	0	3
tr|A0A1S3YZL7|A0A1S3YZL7_TOBAC;tr|A0A1S3YJF2|A0A1S3YJF2_TOBAC	tr|A0A1S3YZL7|A0A1S3YZL7_TOBAC uncharacterized protein LOC107781557 OS=Nicotiana tabacum OX=4097 GN=LOC107781557 PE=3 SV=1;tr|A0A1S3YJF2|A0A1S3YJF2_TOBAC uncharacterized protein LOC107776925 OS=Nicotiana tabacum OX=4097 GN=LOC107776925 PE=3 SV=1	1	1	1	7.2	7.2	7.2	2.4605	0	5082300	0	0	2529500	2325800	912860	0	1918600	1849900	2547200	0	0	0	0	0	0	0	0	0	0	0	0	0	5
tr|A0A1S3YJF9|A0A1S3YJF9_TOBAC;tr|A0A1S4CX34|A0A1S4CX34_TOBAC	tr|A0A1S3YJF9|A0A1S3YJF9_TOBAC uncharacterized protein LOC107776775 OS=Nicotiana tabacum OX=4097 GN=LOC107776775 PE=4 SV=1;tr|A0A1S4CX34|A0A1S4CX34_TOBAC uncharacterized protein LOC107823531 OS=Nicotiana tabacum OX=4097 GN=LOC107823531 PE=4 SV=1	1	1	1	9.2	9.2	9.2	-2	226410000	223340000	78172000	92700000	211240000	167390000	56557000	26400000	148380000	182900000	158300000	75103000	0	0	0	0	0	0	0	0	0	0	0	0	1
tr|A0A1S3YJI3|A0A1S3YJI3_TOBAC	tr|A0A1S3YJI3|A0A1S3YJI3_TOBAC 30S ribosomal protein S20, chloroplastic-like OS=Nicotiana tabacum OX=4097 GN=LOC107776799 PE=3 SV=1	4	1	1	34.9	17.8	17.8	4.7383	274580000	0	0	149430000	425480000	570300000	379620000	147640000	244930000	353420000	274980000	174880000	0	0	0	0	0	0	0	0	0	0	0	0	7
tr|A0A1S3YJK2|A0A1S3YJK2_TOBAC	tr|A0A1S3YJK2|A0A1S3YJK2_TOBAC luminal-binding protein 5-like OS=Nicotiana tabacum OX=4097 GN=LOC107776733 PE=3 SV=1	23	3	0	45.2	6.3	0	14.424	605320000	719560000	0	348580000	598220000	0	17186000	212160000	575330000	597910000	106450000	260740000	537860000	333780000	0	537150000	345760000	0	0	384500000	313360000	0	0	0	15
tr|A0A1S3YJY8|A0A1S3YJY8_TOBAC;tr|A0A1S3YJK6|A0A1S3YJK6_TOBAC;tr|A0A1S4D2C2|A0A1S4D2C2_TOBAC	tr|A0A1S3YJY8|A0A1S3YJY8_TOBAC AP-4 complex subunit epsilon OS=Nicotiana tabacum OX=4097 GN=LOC107776976 PE=3 SV=1;tr|A0A1S3YJK6|A0A1S3YJK6_TOBAC AP-4 complex subunit epsilon OS=Nicotiana tabacum OX=4097 GN=LOC107776976 PE=3 SV=1;tr|A0A1S4D2C2|A0A1S4D2C2_T	4	4	4	4.1	4.1	4.1	11.609	139670000	294510000	19946000	59177000	318490000	212180000	138530000	79968000	256230000	229260000	379380000	92091000	62450000	0	0	70726000	90727000	58691000	68429000	86638000	86176000	79842000	127980000	92396000	11
tr|A0A1S4CJ18|A0A1S4CJ18_TOBAC;tr|A0A1S3YJL2|A0A1S3YJL2_TOBAC;tr|E1APE9|E1APE9_TOBAC;tr|A0A1S3YJC0|A0A1S3YJC0_TOBAC	tr|A0A1S4CJ18|A0A1S4CJ18_TOBAC Delta-1-pyrroline-5-carboxylate synthase OS=Nicotiana tabacum OX=4097 GN=LOC107819560 PE=3 SV=1;tr|A0A1S3YJL2|A0A1S3YJL2_TOBAC Delta-1-pyrroline-5-carboxylate synthase OS=Nicotiana tabacum OX=4097 GN=LOC107776743 PE=3 SV=1;tr	12	7	7	22.9	13.8	13.8	17.067	164650000	152500000	61605000	64163000	63169000	160630000	65738000	139130000	146310000	160520000	103480000	84360000	45029000	22325000	40376000	52019000	12977000	28582000	30319000	242150000	25542000	20652000	21903000	65780000	22
tr|A0A1S3YJQ5|A0A1S3YJQ5_TOBAC;tr|A0A1S3X179|A0A1S3X179_TOBAC	tr|A0A1S3YJQ5|A0A1S3YJQ5_TOBAC 40S ribosomal protein S8 OS=Nicotiana tabacum OX=4097 GN=LOC107776903 PE=3 SV=1;tr|A0A1S3X179|A0A1S3X179_TOBAC 40S ribosomal protein S8 OS=Nicotiana tabacum OX=4097 GN=LOC107760240 PE=3 SV=1	8	2	2	42.3	13.2	13.2	30.297	130850000	235690000	96574000	74755000	284230000	212920000	130010000	59223000	228380000	199850000	394520000	112320000	70712000	0	0	0	156500000	120350000	129550000	114840000	120790000	126450000	164450000	0	24
tr|A0A1S3YJR9|A0A1S3YJR9_TOBAC;tr|A0A1S3ZMX7|A0A1S3ZMX7_TOBAC;tr|A0A1S3ZYY4|A0A1S3ZYY4_TOBAC;tr|A0A1S3ZN55|A0A1S3ZN55_TOBAC;tr|A0A1S3ZZ55|A0A1S3ZZ55_TOBAC;tr|A0A1S4AAN3|A0A1S4AAN3_TOBAC;tr|A0A1S4AAI6|A0A1S4AAI6_TOBAC;tr|A0A1S3ZMG1|A0A1S3ZMG1_TOBAC;tr|A0A1S4AAH9|A0A1S4AAH9_TOBAC;tr|A0A1S3ZZC1|A0A1S3ZZC1_TOBAC;tr|A0A1S3YN17|A0A1S3YN17_TOBAC;tr|A0A1S3YMA7|A0A1S3YMA7_TOBAC;tr|A0A1S3XYB8|A0A1S3XYB8_TO…	tr|A0A1S3YJR9|A0A1S3YJR9_TOBAC Serine/threonine-protein phosphatase 2A 55 kDa regulatory subunit B OS=Nicotiana tabacum OX=4097 GN=LOC107776791 PE=3 SV=1;tr|A0A1S3ZMX7|A0A1S3ZMX7_TOBAC Serine/threonine-protein phosphatase 2A 55 kDa regulatory subunit B OS=	3	3	3	8	8	8	14.505	121210000	191580000	66933000	69107000	126960000	213590000	166190000	81071000	116130000	121240000	115120000	79061000	55763000	56806000	75645000	52382000	46153000	58741000	82391000	116910000	0	32646000	24821000	55923000	15
tr|A0A1S4DR25|A0A1S4DR25_TOBAC;tr|A0A1S3YJX8|A0A1S3YJX8_TOBAC;tr|A0A1S4CNM8|A0A1S4CNM8_TOBAC;tr|A0A1S3ZD65|A0A1S3ZD65_TOBAC;tr|A0A1S4DJC2|A0A1S4DJC2_TOBAC;tr|A0A1S4D2K7|A0A1S4D2K7_TOBAC	tr|A0A1S4DR25|A0A1S4DR25_TOBAC uncharacterized protein LOC107832524 OS=Nicotiana tabacum OX=4097 GN=LOC107832524 PE=4 SV=1;tr|A0A1S3YJX8|A0A1S3YJX8_TOBAC uncharacterized protein LOC107776964 OS=Nicotiana tabacum OX=4097 GN=LOC107776964 PE=4 SV=1;tr|A0A1S4C	1	1	1	2.8	2.8	2.8	2.398	0	0	0	0	0	0	0	0	0	0	0	0	0	0	0	0	0	0	0	0	0	0	0	0	1
tr|A0A1S3YU20|A0A1S3YU20_TOBAC;tr|A0A1S3YUR4|A0A1S3YUR4_TOBAC;tr|A0A1S3YJY7|A0A1S3YJY7_TOBAC;tr|A0A1S3XVS8|A0A1S3XVS8_TOBAC;tr|A0A1S4BJV9|A0A1S4BJV9_TOBAC	tr|A0A1S3YU20|A0A1S3YU20_TOBAC Calreticulin OS=Nicotiana tabacum OX=4097 GN=LOC107779794 PE=3 SV=1;tr|A0A1S3YUR4|A0A1S3YUR4_TOBAC Calreticulin OS=Nicotiana tabacum OX=4097 GN=LOC107779794 PE=3 SV=1;tr|A0A1S3YJY7|A0A1S3YJY7_TOBAC Calreticulin OS=Nicotiana t	6	6	6	15.8	15.8	15.8	98.686	280040000	828020000	101040000	261100000	225270000	451060000	193960000	123390000	376140000	273660000	175580000	82341000	72324000	210430000	78359000	92703000	74423000	112340000	94827000	91370000	124990000	110650000	92014000	67756000	25
tr|A0A1S3YKW7|A0A1S3YKW7_TOBAC;tr|A0A1S3YK07|A0A1S3YK07_TOBAC;tr|A0A1S3YKW2|A0A1S3YKW2_TOBAC;tr|A0A1S3YKT8|A0A1S3YKT8_TOBAC	tr|A0A1S3YKW7|A0A1S3YKW7_TOBAC Glutathione reductase OS=Nicotiana tabacum OX=4097 GN=LOC107777121 PE=3 SV=1;tr|A0A1S3YK07|A0A1S3YK07_TOBAC Glutathione reductase OS=Nicotiana tabacum OX=4097 GN=LOC107777100 PE=3 SV=1;tr|A0A1S3YKW2|A0A1S3YKW2_TOBAC Glutathio	3	3	3	7.5	7.5	7.5	6.8608	36516000	134210000	24929000	16841000	0	71847000	84802000	0	106360000	172880000	143180000	24474000	0	0	0	0	0	0	0	0	31678000	44118000	0	0	3
tr|A0A1S3YK28|A0A1S3YK28_TOBAC	tr|A0A1S3YK28|A0A1S3YK28_TOBAC transcription factor TCP2-like OS=Nicotiana tabacum OX=4097 GN=LOC107777006 PE=4 SV=1	1	1	1	3.3	3.3	3.3	-2	196790000	193000000	88278000	112490000	296870000	124810000	95643000	0	222200000	335030000	287840000	114470000	0	0	0	0	0	0	0	0	0	0	0	0	1
tr|A0A1S3ZGZ9|A0A1S3ZGZ9_TOBAC;tr|A0A1S3YK35|A0A1S3YK35_TOBAC;tr|A0A1S3YQB3|A0A1S3YQB3_TOBAC;tr|A0A1S3YX02|A0A1S3YX02_TOBAC;tr|A0A1S3ZPZ6|A0A1S3ZPZ6_TOBAC	tr|A0A1S3ZGZ9|A0A1S3ZGZ9_TOBAC 40S ribosomal protein S4 OS=Nicotiana tabacum OX=4097 GN=LOC107786652 PE=3 SV=1;tr|A0A1S3YK35|A0A1S3YK35_TOBAC 40S ribosomal protein S4 OS=Nicotiana tabacum OX=4097 GN=LOC107776966 PE=3 SV=1;tr|A0A1S3YQB3|A0A1S3YQB3_TOBAC 40S	10	1	1	38.6	3.4	3.4	5.0292	122510000	0	0	0	184190000	321590000	200960000	44761000	63665000	192840000	276730000	62921000	0	0	0	0	0	0	0	0	0	0	0	0	2
tr|A0A1S3YKD5|A0A1S3YKD5_TOBAC	tr|A0A1S3YKD5|A0A1S3YKD5_TOBAC AAA-ATPase At3g50940-like OS=Nicotiana tabacum OX=4097 GN=LOC107777233 PE=3 SV=1	19	19	17	48.4	48.4	46	305.2	1693200000	2642300000	1336500000	1024300000	6047100000	8527000000	3536300000	3846600000	4526500000	5831300000	5059300000	1982500000	655970000	800420000	779620000	760200000	1200200000	973940000	915750000	879470000	922130000	970540000	933810000	1033800000	195
tr|A0A1S3YKH3|A0A1S3YKH3_TOBAC;tr|A0A1S4B900|A0A1S4B900_TOBAC	tr|A0A1S3YKH3|A0A1S3YKH3_TOBAC thioredoxin-dependent peroxiredoxin OS=Nicotiana tabacum OX=4097 GN=LOC107777133 PE=4 SV=1;tr|A0A1S4B900|A0A1S4B900_TOBAC thioredoxin-dependent peroxiredoxin OS=Nicotiana tabacum OX=4097 GN=LOC107805800 PE=4 SV=1	3	3	3	13.1	13.1	13.1	14.965	216240000	369710000	83508000	106690000	300680000	239900000	133800000	53677000	405390000	264470000	224460000	98857000	116700000	81331000	74946000	79386000	71937000	68764000	62626000	69713000	113400000	77070000	46888000	71221000	19
tr|A0A1S3YKI8|A0A1S3YKI8_TOBAC;tr|A0A1S4AC19|A0A1S4AC19_TOBAC	tr|A0A1S3YKI8|A0A1S3YKI8_TOBAC Succinate dehydrogenase [ubiquinone] flavoprotein subunit, mitochondrial OS=Nicotiana tabacum OX=4097 GN=LOC107777278 PE=3 SV=1;tr|A0A1S4AC19|A0A1S4AC19_TOBAC Succinate dehydrogenase [ubiquinone] flavoprotein subunit, mitocho	5	5	5	12.5	12.5	12.5	52.566	314420000	336900000	284460000	157640000	258620000	525530000	198090000	264790000	494330000	390400000	501780000	218680000	219470000	92183000	272670000	162360000	122850000	141710000	154130000	352310000	197420000	137230000	146770000	246650000	21
tr|A0A1S3YL03|A0A1S3YL03_TOBAC;tr|A0A1S3YKL0|A0A1S3YKL0_TOBAC;tr|A0A1S3YKZ4|A0A1S3YKZ4_TOBAC;tr|A0A2R3YZM7|A0A2R3YZM7_TOBAC	tr|A0A1S3YL03|A0A1S3YL03_TOBAC calmodulin-binding transcription activator 3-like isoform X3 OS=Nicotiana tabacum OX=4097 GN=LOC107777284 PE=3 SV=1;tr|A0A1S3YKL0|A0A1S3YKL0_TOBAC Calmodulin-binding transcription activator 4 OS=Nicotiana tabacum OX=4097 GN=L	5	5	1	8	8	1.9	44.123	285560000	803190000	318980000	128620000	901120000	792460000	527170000	208550000	704210000	684350000	554230000	113490000	125490000	145510000	194820000	80732000	199210000	163240000	157370000	109110000	136370000	131140000	111340000	85334000	27
[truncated: 1,255 more rows]
