# Supplementary material for: Evolutionary tuning of molecular charge state of UBP24 shapes eukaryotic responses to high temperature
Source: Research Square preprint supplement (doi:10.21203/rs.3.rs-7157930/v1), 2025-11-11
Supplement: Supplementary file 4 [file aa93bc2e5a33c20a6a3fe319.xlsx]

## Sheet: Sup. Data 2a
Supplementary Data 2a. UBP24 phosphosites identified from 21°C and 35°C treated 10-day-old 35S:GFP-UBP24 seedlings.
Protein	Site	Residue	Normalized intensity.35S:GFP-UBP24_21deg_rep1	Normalized intensity.35S:GFP-UBP24_21deg_rep2	Normalized intensity.35S:GFP-UBP24_21deg_rep3	Normalized intensity.35S:GFP-UBP24_35deg_rep1	Normalized intensity.35S:GFP-UBP24_35deg_rep2	Normalized intensity.35S:GFP-UBP24_35deg_rep3	Fold change (35deg-vs-21deg)	Student's T-test one-tailed p-value	Proteins	Positions within proteins	Raw intensity.35S:GFP-UBP24_21deg_rep1	Raw intensity.35S:GFP-UBP24_21deg_rep2	Raw intensity.35S:GFP-UBP24_21deg_rep3	Raw intensity.35S:GFP-UBP24_35deg_rep1	Raw intensity.35S:GFP-UBP24_35deg_rep2	Raw intensity.35S:GFP-UBP24_35deg_rep3	Localization prob	Score diff	PEP	Score	Delta score	Score for localization	Number of Phospho (STY)	Phospho (STY) Probabilities	Phospho (STY) Score diffs	Charge	Mass error [ppm]
AT4G30890.3	118	S	NA	NA	NA	NA	NA	NA	NA	NA	AT4G30890.3;AT4G30890.2;AT4G30890.1	118;118;118	28685000	0	0	0	0	0	0.844521	7.39323	3.72295E-15	123.38	74.68	61.167	1	EIS(0.845)ES(0.154)NKS(0.002)LNNGVAVK	EIS(7.4)ES(-7.4)NKS(-27)LNNGVAVK	3	-1.8846
AT4G30890.3	120	S	1.12732	0.979571	0.87978	1.47101	1.21136	1.47323	1.39138	0.0137127	AT4G30890.3;AT4G30890.2;AT4G30890.1	120;120;120	0	29821000	30743000	20781000	17244000	12709000	0.996573	24.7366	9.685840000000001E-29	144.18	92.637	144.18	1	EIS(0.003)ES(0.997)NKSLNNGVAVK	EIS(-25)ES(25)NKS(-41)LNNGVAVK	2	-0.55559
AT4G30890.3	168	S	0.860883	1.1187	1.04382	1.26369	1.36642	1.10411	1.2351	0.0467565	AT4G30890.3;AT4G30890.2;AT4G30890.1	168;168;168	298770000	425530000	455750000	223060000	243040000	119010000	0.960466	15.7099	0	322.15	301.76	290.94	1;2	FQALDNEDFS(0.026)S(0.96)DS(0.012)S(0.002)SGSIQR	FQALDNEDFS(-16)S(16)DS(-19)S(-27)S(-35)GS(-50)IQR	2	-0.047647
AT4G30890.3	101	S	1.00277	1.21068	0.805605	1.3732	3.15491	3.40044	2.62617	0.0600746	AT4G30890.3;AT4G30890.2;AT4G30890.1	101;101;101	969330000	1282700000	979720000	675140000	1563000000	1020900000	1	42.309	1.54086E-08	100.92	64.395	42.309	1	NS(1)LRVPEHVVQNGIIK	NS(42)LRVPEHVVQNGIIK	3	0.079065
AT4G30890.3	11	S	0.964874	1.04902	0.993757	1.6542	2.0178	2.44138	2.03261	0.0217969	AT4G30890.3;AT4G30890.2;AT4G30890.1	11;11;11	1966900000	2343800000	2548600000	1715100000	2108100000	1545700000	0.99975	36.0276	5.79504E-71	201.75	160.87	128.96	1	VFVFGS(1)FTEHETR	VFVFGS(36)FT(-36)EHET(-69)R	3	-0.56032
AT4G30890.3	85	S	0.81502	1.33784	0.894755	0.921323	1.20215	1.85478	1.30537	0.20005	AT4G30890.3;AT4G30890.2;AT4G30890.1	85;85;85	23421000	42137000	0	13466000	17705000	0	0.96761	17.7632	6.29679E-13	111.97	89.924	107.75	1	LDAS(0.016)RPAS(0.968)S(0.016)DKNNDSDAK	LDAS(-18)RPAS(18)S(-18)DKNNDS(-73)DAK	2	0.58598
AT4G30890.3	141	S	0.580634	1.32091	1.16561	2.71566	0.880952	2.35937	1.94186	0.11119	AT4G30890.3;AT4G30890.2;AT4G30890.1	141;141;141	6003800	14970000	15163000	14282000	4668500	7577000	0.823205	7.2869	6.2004E-09	77.078	64.718	45.704	1	T(0.016)DPIGLDNLS(0.823)MS(0.154)DGES(0.007)DPVYK	T(-17)DPIGLDNLS(7.3)MS(-7.3)DGES(-21)DPVY(-42)K	2	-1.1159
AT4G30890.3	143	S	0.800422	1.22971	1.00888	1.40113	2.07859	0.92659	1.44991	0.152715	AT4G30890.3;AT4G30890.2;AT4G30890.1	143;143;143	1697700000	2858700000	2692100000	1511500000	2259500000	610390000	0.998612	29.3087	2.3610500000000002E-199	253.11	233.39	201.61	1	TDPIGLDNLSMS(0.999)DGES(0.001)DPVYK	T(-170)DPIGLDNLS(-37)MS(29)DGES(-29)DPVY(-86)K	2	-0.30271
AT4G30890.3	360	S	0.710763	1.244	1.09363	1.49051	1.32405	1.77173	1.5045	0.0347672	AT4G30890.3;AT4G30890.2;AT4G30890.1	360;360;360	118630000	227570000	229640000	126530000	113260000	91843000	0.998436	28.0512	2.1512200000000002E-23	137.44	108.1	135.08	1	T(0.002)QS(0.998)FVPSELSEIFGGQLK	T(-28)QS(28)FVPS(-76)ELS(-100)EIFGGQLK	2	0.73955

## Sheet: Sup. Data 2b
Supplementary Data 2b. UBP24 interacting partners identified by comparison of immunoprecipitated products from 10-day-old WT and 35S:GFP-UBP24 seedlings.
Protein	Proteins	Primary Gene Symbol	All Gene Symbols	Description	Proteins	Scaled intensity.35S:GFP-UBP24_21deg_rep1	Scaled intensity.35S:GFP-UBP24_21deg_rep2	Scaled intensity.35S:GFP-UBP24_21deg_rep3	Scaled intensity.WT_21deg_rep1	Scaled intensity.WT_21deg_rep2	Scaled intensity.WT_21deg_rep3	log2 Fold change (35S:GFP-UBP24-vs-WT)	One-tailed Student's T-test -log10 p-value	Peptides	Razor + unique peptides	Unique peptides	Sequence coverage [%]	Unique + razor sequence coverage [%]	Unique sequence coverage [%]	Score	Raw Intensity.35S:GFP-UBP24_21deg_rep1	Raw Intensity.35S:GFP-UBP24_21deg_rep2	Raw Intensity.35S:GFP-UBP24_21deg_rep3	Raw intensity.WT_21deg_rep1	Raw intensity.WT_21deg_rep2	Raw intensity.WT_21deg_rep3	LFQ intensity.35S:GFP-UBP24_21deg_rep1	LFQ intensity.35S:GFP-UBP24_21deg_rep2	LFQ intensity.35S:GFP-UBP24_21deg_rep3	LFQ intensity.WT_21deg_rep1	LFQ intensity.WT_21deg_rep2	LFQ intensity.WT_21deg_rep3	MS/MS count	Peptide sequences
AT5G60980	AT5G60980.4;AT5G60980.1	(NTF2)	(ATG3BP-1); (ATG3BP8); (NTF2)	Nuclear transport factor 2 (NTF2) family protein with RNA binding (RRM-RBD-RNP motifs) domain-containing protein;(source:Araport11)		35.1403	34.5962	34.9205	26.0144	24.1814	23.6788	10.2608	2.7728	23	1	1	58.6	3.5	3.5	61.697	1285900000	1299300000	1606199999.9999998	0	0	0	1356300000	1117700000	1476099999.9999998	0	0	0	66	AFVEQYYHILHQSPGLVHR;AQQEASPSPGAEVVGR;DVQAPIEPER;FLEEKEVTAQAR;FSQSFFLAPQDK;FYQDSSFLTR;FYQDSSFLTRPDVTGAVTTVTTMQAINDK;GVIVLVTGR;GYFVLNDVFR;HEGIQVR;HSYASILK;ILSLKYEDYTAEIETADAQESHER;KFSQSFFLAPQDK;LTAPPAEPAAR;LTAPPAEPAARPEASAHENVPNSSHVDVEDDGHSIYVR;NFGAIKHEGIQVR;NKPRPAPVNQK;NLPFDSTPTQLEEVFK;PEASAHENVPNSSHVDVEDDGHSIYVR;QGFCFGFVEFETSSGK;QSALEASPVTIGDR;SSPAPTTHVAR;YEDYTAEIETADAQESHER
AT4G30890	AT4G30890.3;AT4G30890.2;AT4G30890.1	UBIQUITIN-SPECIFIC PROTEASE 24 (UBP24)	UBIQUITIN-SPECIFIC PROTEASE 24 (UBP24)	Encodes a ubiquitin-specific protease.		37.8073	37.5014	37.7101	26.9167	27.7834	28.0442	10.0915	3.53769	54	54	54	87.3	87.3	87.3	323.31	188940000000	271630000000	285140000000	19026000	38127000	53141000	17138000000	14282000000	15723000000	1643500	6365600	2578800	4052	ADSPTLAAFSEFISELDVPSSSSIR;ASATVQPYLLLHLDIHPDGVQGIEDALHLFSAQEDLEGYR;CVGSIQFGSLNLAAENSSVNTNGELK;CVGSIQFGSLNLAAENSSVNTNGELKK;CVGSIQFGSLNLAAENSSVNTNGELKKGEADGTVK;DKCVGSIQFGSLNLAAENSSVNTNGELKK;EISESNKSLNNGVAVK;FDDASVTPIGTK;FPLELNLNR;FQALDNEDFSSDSSSGSIQR;FSYGSQGSTK;GLINAGNLCFLNATLQALLSCSPFVQLLQK;GVKFPLELNLNR;IQLQDIPK;IQLQDIPKADSPTLAAFSEFISELDVPSSSSIR;KGVKFPLELNLNR;KNGQWLR;KNSLRVPEHVVQNGIIK;KVFVFGSFTEHE…
AT1G69250	AT1G69250.1;AT1G69250.2	(ATG3BP3)	(ATG3BP3); (ATG3BP-4)	Nuclear transport factor 2 (NTF2) family protein with RNA binding (RRM-RBD-RNP motifs) domain-containing protein;(source:Araport11)		33.133	32.7468	32.7846	21.4207	24.4437	23.4464	9.78452	2.43882	19	19	19	52.5	52.5	52.5	323.31	7399499999.999999	10062000000	9382700000	0	0	0	3372999999.9999995	2459400000	2309100000	0	0	0	231	ATEGVVPSAQDIAAEFVR;DFGPIKENGIQVR;EKEVDYDGSKPSGK;EVDYDGSKPSGK;FSQMFYLAR;HILSCDFENTK;LYVDASVVSR;NAAPFQVK;NTPFMLADR;QNTLVVLNDMLR;QYYHVLGQLPHEAR;SFADIVGSMAK;SPVQAPVQKPK;TNGSAEDGEKEFK;VIEVPGTSIFVANLPLNAMPPQLFELFK;VTEPDAAPQPDGAK;VTEPDAAPQPDGAKR;YVDQEDSSTTETPCEPVTEIVR;YVDQEDSSTTETPCEPVTEIVRPADGLK
AT3G61430	AT3G61430.2;AT3G61430.1;AT1G01620.1;AT4G00430.1;AT1G01620.2;AT4G00430.2	PLASMA MEMBRANE INTRINSIC PROTEIN 1A (PIP1A)	PLASMA MEMBRANE INTRINSIC PROTEIN 1A (PIP1A);ARABIDOPSIS THALIANA PLASMA MEMBRANE INTRINSIC PROTEIN 1 (ATPIP1);PLASMA MEMBRANE INTRINSIC PROTEIN 1 (PIP1);PLASMA MEMBRANE INTRINSIC PROTEIN 1;1 (PIP1;1)	a member of the plasma membrane intrinsic protein subfamily PIP1. localizes to the plasma membrane and exhibits water transport activity in Xenopus oocyte. expressed ubiquitously and protein level decreases slightly during leaf development. The mRNA is cell-to-cell mobile.		24.8114	23.9935	23.9458	23.7754	24.7861	23.6959	0.164411	0.43539	4	1	0	22	3.5	0	3.0422	23129000	23317000	20492000	2156400	4774800	2608900	33586000	20423000	18630000	12885000	24640000	10677000	10	DSHVPILAPLPIGFAVFLVHLATIPITGTGINPAR;MEGKEEDVR;SLGAAIIYNK;VGANKFPER
AT1G02500	AT1G02500.2;AT1G02500.1	S-ADENOSYLMETHIONINE SYNTHETASE 1 (SAM1)	S-ADENOSYLMETHIONINE SYNTHETASE 1 (SAM1);S-ADENOSYLMETHIONINE SYNTHETASE-1 (SAM-1); (SAMS1); (AtSAM1); (METK1); (MAT1)	encodes a S-adenosylmethionine synthetase. SAM1 is regulated by protein S-nitrosylation. The covalent binding of nitric oxide (NO) to the Cys114 residue inhibits the enzyme activity.		26.5484	27.0125	27.2779	26.1607	27.1545	25.9233	0.533423	0.821157	15	5	3	49.4	30.5	15.3	26.419	77099000	189010000	206370000	11266000	24656000	12217000	39146000	51842000	57054000	35218000	63446000	28776000	25	AIGFVSDDVGLDADK;ALVQVSYAIGVPEPLSVFVDTYETGLIPDKEILK;DDPDFTWEVVKPLK;EHVIKPVIPEK;FVIGGPHGDAGLTGR;IIIDTYGGWGAHGGGAFSGK;IIIDTYGGWGAHGGGAFSGKDPTK;KIIIDTYGGWGAHGGGAFSGK;KIIIDTYGGWGAHGGGAFSGKDPTK;METFLFTSESVNEGHPDK;METFLFTSESVNEGHPDKLCDQISDAVLDACLEQDPDSK;TAAYGHFGR;TAAYGHFGRDDPDFTWEVVKPLK;TQVTVEYYNDK;VHTVLISTQHDETVTNDEIAR
AT3G25150	AT3G25150.1;AT3G25150.2	(ATG3BP6)	(ATG3BP6); (ATG3BP-3)	Nuclear transport factor 2 (NTF2) family protein with RNA binding (RRM-RBD-RNP motifs) domain-containing protein;(source:Araport11)		33.0332	32.476	32.7959	22.8807	22.4301	24.0745	9.63996	3.25665	17	17	17	47.3	47.3	47.3	323.31	6904899999.999999	8340099999.999999	9456400000	0	0	3391600	1875299999.9999998	1435100000	1645699999.9999998	0	0	2977300	299	ALGPSIYLK;ANGDGGGFPR;ATKPVDDAPR;EIPDDFVQEK;FIDEGTVVHGNQIPVNNVQAPVNTYQDTAAAK;FYQEISK;GLPLDATPALLENEFQK;KQEDQAIHIPLPTPLSEK;LGRPEENGLMSITSTLQAIDKK;QTEVLSK;SDSGANVAVNENNQENER;SINEPEKVFTPSEDEQVSAAEEALVTETVNEAPIEVQK;SYASIVK;TDFNGYGNNR;TGEIPKR;VFTPSEDEQVSAAEEALVTETVNEAPIEVQK;YVQENHAVK
AT1G03130	AT1G03130.1;AT4G02770.1	PHOTOSYSTEM I SUBUNIT D-2 (PSAD-2)	PHOTOSYSTEM I SUBUNIT D-2 (PSAD-2)	Encodes a protein predicted by sequence similarity with spinach PsaD to be photosystem I reaction center subunit II (PsaD2)		26.6808	27.6009	26.853	29.6306	29.5673	29.794	-2.61904	2.37097	6	6	6	39.2	39.2	39.2	77.278	84511000	284200000	153720000	124830000	131290000	178710000	75937000	160840000	101850000	353240000	336750000	322120000	47	EAPVGFTPPQLDPNTPSPIFAGSTGGLLR;EGVGLNMR;EQIFEMPTGGAAIMR;ITYQFYR;NVSPIEVK;VFPNGEVQYLHPK
AT1G03220	AT1G03220.1	SECRETED ASPARTIC PROTEASE 2 (SAP2)	SECRETED ASPARTIC PROTEASE 2 (SAP2)	Eukaryotic aspartyl protease family protein;(source:Araport11)		24.1413	24.6084	24.6948	24.2011	24.008	23.5579	0.559195	1.3206	3	3	3	12	12	12	8.025	14536000	35710000	34441000	2896600	0	2370800	17808000	20614000	18505000	15570000	0	9480600	9	FGFSSTLLGR;IFGANSMVSVSDDVICLGFVDGGVNAR;IPNLIFDCGATFLLK
AT1G03600	AT1G03600.1	(PSB27)	(PSB27)	PSB27 is a chloroplast lumen localized protein that is involved in adaptation to changes in light intensity.		24.759	25.3256	23.9833	26.8762	26.7232	26.1323	-1.88792	1.9681	3	3	3	27.6	27.6	27.6	57.028	22304000	58705000	21032000	18500000	18284000	14121000	12467000	30197000	11455000	86832000	67003000	14532000	11	DIYSALNAVSGHYVSFGPTAPIPAK;ILEEMETAEK;TDPNVADAVAELR
AT1G03680	AT1G03680.1	THIOREDOXIN M-TYPE 1 (THM1)	ABC TRANSPORTER OF THE MITOCHONDRION 1 (ATM1);ARABIDOPSIS THIOREDOXIN M-TYPE 1 (ATM1);THIOREDOXIN M-TYPE 1 (TRX-M1);THIOREDOXIN M-TYPE 1 (THM1);THIOREDOXIN M-TYPE 1 (ATHM1)	Encodes a m-type thioredoxin (Trx-m1) localized in chloroplast stroma.		23.5772	24.837	24.1766	26.3119	26.2617	26.6719	-2.21823	2.07075	2	2	2	16.8	16.8	16.8	31.167	9831700	41842000	24048000	12511000	13279000	20527000	8670100	19070000	14113000	39846000	24036000	44629000	9	ADEPVFVDFWAPWCGPCK;MIDPIVNELAQK
AT1G04170	AT1G04170.2;AT1G04170.1	EUKARYOTIC TRANSLATION INITIATION FACTOR 2 GAMMA SUBUNIT (EIF2 GAMMA)	EUKARYOTIC TRANSLATION INITIATION FACTOR 2 GAMMA SUBUNIT (EIF2 GAMMA)	protein synthesis initiation factor eIF2 gamma The mRNA is cell-to-cell mobile.		23.1518	24.7487	25.2642	24.8974	24.7258	24.3783	-0.278956	0.451367	3	3	3	9.7	9.7	9.7	6.5798	7320700	39358000	51105000	4693600	4579300	4186700	17112000	20411000	27357000	0	0	0	8	IDLIQENVAINQHEAIQK;SFDVNKPGYEVDEIK;YNIDVVCEYIVK
AT5G60980	AT5G60980.4;AT5G60980.1	(NTF2)	(ATG3BP-1); (ATG3BP8); (NTF2)	Nuclear transport factor 2 (NTF2) family protein with RNA binding (RRM-RBD-RNP motifs) domain-containing protein;(source:Araport11)		30.6083	29.7937	30.2382	24.1417	21.9964	21.6571	7.61502	2.49644	23	1	1	58.6	3.5	3.5	61.697	1285900000	1299300000	1606199999.9999998	0	0	0	1356300000	1117700000	1476099999.9999998	0	0	0	66	AFVEQYYHILHQSPGLVHR;AQQEASPSPGAEVVGR;DVQAPIEPER;FLEEKEVTAQAR;FSQSFFLAPQDK;FYQDSSFLTR;FYQDSSFLTRPDVTGAVTTVTTMQAINDK;GVIVLVTGR;GYFVLNDVFR;HEGIQVR;HSYASILK;ILSLKYEDYTAEIETADAQESHER;KFSQSFFLAPQDK;LTAPPAEPAAR;LTAPPAEPAARPEASAHENVPNSSHVDVEDDGHSIYVR;NFGAIKHEGIQVR;NKPRPAPVNQK;NLPFDSTPTQLEEVFK;PEASAHENVPNSSHVDVEDDGHSIYVR;QGFCFGFVEFETSSGK;QSALEASPVTIGDR;SSPAPTTHVAR;YEDYTAEIETADAQESHER
AT1G04410	AT1G04410.1;AT5G43330.1	CYTOSOLIC-NAD-DEPENDENT MALATE DEHYDROGENASE 1 (c-NAD-MDH1)	CYTOSOLIC-NAD-DEPENDENT MALATE DEHYDROGENASE 1 (c-NAD-MDH1); (NDH1)	predicted to encode a cytosolic malate dehydrogenase. Together with GS1 indispensable for Arabidopsis to metabolize HCHO.		26.9272	27.795	27.1595	27.562	27.4985	28.4975	-0.558779	0.900144	8	8	8	29.8	29.8	29.8	87.955	100250000	325130000	190110000	29759000	31295000	72759000	32213000	52634000	40680000	72064000	77126000	89592000	47	ALGQISER;EFAPSIPEK;KLSSALSAASSACDHIR;LSSALSAASSACDHIR;MELIDAAFPLLK;NGDWSIVQGLPIDEVSR;NVIIWGNHSSSQYPDVNHAK;VLVVANPANTNALILK
AT1G04430	AT1G04430.3;AT1G04430.2;AT1G04430.1	0	0	S-adenosyl-L-methionine-dependent methyltransferases superfamily protein;(source:Araport11)		21.766	20.5692	20.7719	26.4942	26.7786	25.4215	-5.19574	3.417	3	1	1	6.6	3.9	3.9	5.6128	0	0	0	14196000	19000000	8627900	0	0	0	86182000	99613000	35874000	5	GSGLAPWPAR;RLPYPSR;VLRPGGYFAYSSPEAYAQDEENLK
AT4G36130	AT4G36130.1	RIBOSOMAL PROTEIN UL2X (UL2X)	RIBOSOMAL PROTEIN UL2X (UL2X)	Ribosomal protein L2 family;(source:Araport11)		29.4205	28.3615	29.2978	21.7296	21.5787	21.5786	7.39764	3.0774	9	2	2	39.1	14.3	14.3	57.674	564470000	481480000	836950000	0	0	0	408340000	224960000	375900000	0	0	0	36	AMIGQVAGGGR;ASGDYAIVIAHNPDNDTSR;ATLVVGNVLPLR;ELFVAAEGMYTGQFLYCGK;GVVTEIIHDPGR;KATLVVGNVLPLR;QKELFVAAEGMYTGQFLYCGK;SIPEGAVICNVEHHVGDR;SLDFGER
AT5G48650	AT5G48650.1	GTPASE?ACTIVATING PROTEIN SH3-DOMAIN?BINDING PROTEIN LIKE (G3BP-LIKE)	(ATG3BP1);GTPASE?ACTIVATING PROTEIN SH3-DOMAIN?BINDING PROTEIN LIKE (G3BP-LIKE)	Negative regulator of defense response to Pseudomonas syringae pv. tomato through altered stomatal and apoplastic immunity.		31.7094	31.1107	31.4473	24.1948	22.1592	26.054	7.28649	1.97993	18	18	18	48	48	48	323.31	2758400000	3237299999.9999995	3713399999.9999995	2884000	772990	13375000	512700000	592030000	416450000	1215000	919220	3500300	172	AIEASPVK;DFSTFQGISEELK;DFSTFQGISEELKR;DKFGVPAVSLPSPK;DNVLVPEIANEVAR;DQEHQAPSDPSTGQILK;EVSKPLDNENAKDNVLVPEIANEVAR;FGVPAVSLPSPK;FTQTFFLAPQEK;FVNDDAKDNVPETIDGEVVSGINSTTPTIINGMK;FYQEISR;GLGYPYGFVEFEEADAAHR;GSEQAACVSVNPVCK;HLPFNANIDMLEAEFK;KFTQTFFLAPQEK;NYDPDDGLADAPK;QFGAITNGGIQVINQR;VGQDGVMR
AT5G35530	AT5G35530.1	RIBOSOMAL PROTEIN US3X (US3X)	RIBOSOMAL PROTEIN US3X (US3X)	Ribosomal protein S3 family protein;(source:Araport11)		28.3733	28.3295	28.7277	21.2943	21.354	20.9965	7.26188	5.99252	17	4	4	72.2	29.4	29.4	25.852	273140000	470920000	563730000	0	0	0	203130000	207110000	227700000	0	0	0	51	ACYGVLR;DGYMVSSGQPTK;EDDVYIAPAQVVTQAAFVPEAPLTTTDYPAMPVA;ELAEDGYSGVEVR;ELTSLVQK;EYIDAAVR;FKDGYMVSSGQPTK;FKFPQDSVELYAEK;FVADGVFYAELNEVLTR;FVMESGAK;GCEVIVSGK;GLCAIAQAESLR;IMLDWDPK;KFVADGVFYAELNEVLTR;QGPMTPLPDVVIIHTPK;RACYGVLR;TQNVLGEK
AT1G50010	AT1G50010.1;AT1G04820.1	TUBULIN ALPHA-2 CHAIN (TUA2)	TUBULIN ALPHA-2 CHAIN (TUA2)	Encodes alpha-2,4 tubulin. TUA2 and TUA4 encode identical proteins. The mRNA is cell-to-cell mobile.		31.4162	31.0932	31.3053	30.5971	31.205	30.308	0.568219	1.11346	17	17	2	62.2	62.2	11.6	323.31	2251100000	3198299999.9999995	3365299999.9999995	243930000	408550000	255200000	1000099999.9999999	923040000	998780000	457050000	552710000	353190000	229	AFVHWYVGEGMEEGEFSEAR;AVCMISNSTSVAEVFSR;AVFVDLEPTVIDEVR;CGINYQPPTVVPGGDLAK;DVNAAVGTIK;ECISIHIGQAGIQVGNACWELYCLEHGIQPDGQMPSDK;EDAANNFAR;EDLAALEKDYEEVGAEGGDDEDDEGEEY;EIVDLCLDR;FDGALNVDVTEFQTNLVPYPR;IHFMLSSYAPVISAEK;KLADNCTGLQGFLVFNAVGGGTGSGLGSLLLER;LADNCTGLQGFLVFNAVGGGTGSGLGSLLLER;QLFHPEQLISGK;QLFHPEQLISGKEDAANNFAR;SLSIERPTYTNLNR;TVGGGDDAFNTFFSETGAGK
AT1G05190	AT1G05190.1	EMBRYO DEFECTIVE 2394 (emb2394)	RIBOSOMAL PROTEIN UL6C (UL6C); (RPL6);EMBRYO DEFECTIVE 2394 (emb2394)	Encodes the plastid 50S ribosomal protein L6.		29.2565	28.9605	29.3714	30.3305	30.0681	29.592	-0.800708	1.64804	13	13	13	52.9	52.9	52.9	131.02	503810000	729310000	880780000	202780000	185780000	155360000	123540000	117420000	129010000	288650000	301720000	164110000	114	EESGFLR;ELVLNLGFSHPVK;EVELTKEESGFLR;GPLGELALTYPR;IGKQPIAVPSNVTIALEGQDLK;KWRPPEPYK;LILVGVGYR;MQIPDSLK;QPIAVPSNVTIALEGQDLK;SEIGQFAATVR;TLTDNMVVGVSK;VKGPLGELALTYPR;YSDEIVR
ATCG00790	ATCG00790.1	RIBOSOMAL PROTEIN L16 (RPL16)	RIBOSOMAL PROTEIN UL16C (UL16C);RIBOSOMAL PROTEIN L16 (RPL16)	chloroplast gene encoding a ribosomal protein L16, which is a constituent of 50S large ribosomal subunit		29.0485	28.1786	29.4145	24.2313	20.7184	22.1266	6.52172	2.12253	3	3	3	31.9	31.9	31.9	21.009	436150000	424150000	907460000	0	0	0	240120000	162390000	389480000	0	0	0	24	GSPEYWVAVVKPGK;IFPDKPVTVRPAETR;ILYEMGGVPENIAR
AT1G06410	AT1G06410.3;AT1G06410.2;AT1G06410.1;AT2G18700.1	TREHALOSE-PHOSPHATASE/SYNTHASE 7 (TPS7)	TREHALOSE-PHOSPHATASE/SYNTHASE 7 (ATTPS7);TREHALOSE -6-PHOSPHATASE SYNTHASE S7 (TPS7); (ATTPSA);TREHALOSE-PHOSPHATASE/SYNTHASE 7 (TPS7)	Encodes an enzyme putatively involved in trehalose biosynthesis. Though the protein has both trehalose-6-phosphate synthase (TPS)-like and trehalose-6-phosphate phosphatase (TPP)-like domains, neither activity has been detected in enzymatic assays nor has the protein been able to complement yeast TPS or TPP mutants.		22.9208	23.4039	22.9018	20.99	21.5995	25.1581	0.492975	0.4307	2	2	2	2.4	2.4	2.4	4.8129	6237600	15495000	9938600	0	0	0	9249300	11322000	9238000	0	0	0	2	AVLVQIVNPAR;VVALDPNFR
AT1G06680	AT1G06680.2;AT1G06680.1	PHOTOSYSTEM II SUBUNIT P-1 (PSBP-1)	PHOTOSYSTEM II SUBUNIT P (PSII-P);OXYGEN-EVOLVING ENHANCER PROTEIN 2 (OEE2);PHOTOSYSTEM II SUBUNIT P-1 (PSBP-1);OXYGEN EVOLVING COMPLEX SUBUNIT 23 KDA (OE23)	Encodes a 23 kD extrinsic protein that is part of photosystem II and participates in the regulation of oxygen evolution. Phosphorylation of this protein is dependent on calcium. In plsp1-1 mutant plastids, the nonmature form of the protein localizes in the stroma. The mRNA is cell-to-cell mobile.		28.0294	28.839	27.9433	29.4439	29.7054	28.9008	-1.07946	1.6435	4	4	4	26.5	26.5	26.5	87.361	215210000	670400000	327310000	109680000	144480000	96223000	158840000	288640000	171000000	290570000	311390000	308410000	54	EIEYPGQVLR;FEDNFDATSNLNVMVTPTDKK;KFVESAATSFSVA;TNTDFLPYNGDGFK
AT3G11940	AT3G11940.2;AT3G11940.1	RIBOSOMAL PROTEIN 5A (RPS5A)	RIBOSOMAL PROTEIN 5A (ATRPS5A);MEI2-LIKE PROTEIN 1 (AML1);ARABIDOPSIS MINUTE-LIKE 1 (AML1);RIBOSOMAL PROTEIN 5A (RPS5A);RIBOSOMAL PROTEIN US7Y (US7Y)	One of two genes encoding the ribosomal protein S5. Mutants have semi-dominant developmental phenotypes. Most cell-division processes are delayed or disturbed in the heterozygous mutant, and development is completely arrested at an early embryonic stage in the homozygous mutant.		28.4026	27.5668	27.7075	21.1321	20.9519	22.3741	6.40627	3.38936	10	1	1	44	9.2	9.2	282.91	278750000	277550000	0	0	0	0	404780000	243110000	0	0	0	0	11	AQCPIVER;ATAADVDAEIQQALTNEVK;GSSNSYAIK;HAMEIIHLLSDLNPIQVIIDAIVNSGPR;KAQCPIVER;QAVDISPLR;QAVDISPLRR;RQAVDISPLR;RQAVDISPLRR;TIAECLADELINAAK
AT3G07010	AT3G07010.2;AT3G07010.1	(ATPLL20)	(ATPLL20)	Pectate lyase		27.5642	26.9001	27.8227	21.0622	18.7868	23.9491	6.16294	1.60332	6	6	4	22.7	22.7	14.4	66.944	155890000	174850000	301050000	0	0	0	46038000	34832000	53443000	0	0	0	33	FLAPVNPFAK;FYVVTDPGDDDPVNPIPGTLR;HAVIQDEPLWIIFK;LADCSIGFGR;SEGDLFLNGAFFTR;VMQVTIAYNHFGEGLIQR
AT1G07140	AT1G07140.1;AT5G58590.1	(SIRANBP)	(SIRANBP)	Encodes a putative Ran-binding protein (siRanBP).		22.4539	23.9649	20.877	25.5791	26.36	24.7386	-3.12728	1.58117	2	2	2	15.4	15.4	15.4	24.528	0	22860000	0	7528300	14215000	5374300	0	17375000	0	46765000	76260000	22866000	5	DFADGELKDELFCIR;LEEVAVTTGEEDEDAVLDLK
AT1G07320	AT1G07320.1;AT1G07320.4;AT1G07320.3;AT1G07320.2	RIBOSOMAL PROTEIN L4 (RPL4)	RIBOSOMAL PROTEIN L4 (RPL4);EMBRYO DEFECTIVE 2784 (EMB2784);PLASTID RIBOSOMAL PROTEIN L4 (PRPL4);RIBOSOMAL PROTEIN UL4C (UL4C)	encodes a plastid ribosomal protein L4		29.4701	29.3574	29.4421	29.0065	29.5677	28.6365	0.352972	0.793639	11	11	11	42.2	42.2	42.2	240.89	584210000	960240000	925010000	80996000	131330000	80114000	279380000	255700000	278130000	215220000	363050000	193320000	91	AMFLMIDVDENVAK;KLAISTALSSAASAEGGAIVVEEFGEK;LAISTALSSAASAEGGAIVVEEFGEK;LAISTALSSAASAEGGAIVVEEFGEKFEKPK;LVLTPAAVEFLNAR;TLNLFDILNADK;TLNLFDILNADKLVLTPAAVEFLNAR;TPLRPGGGVVFGPR;TPLRPGGGVVFGPRPK;VGETYLDLK;YGVDAVEEEDDDEDETEGSEEA
AT2G38750	AT2G38750.2;AT2G38750.1	ANNEXIN 4 (ANNAT4)	ANNEXIN 4 (ANNAT4); (ATANN4)	Annexins are a family of calcium dependent membrane binding proteins though to be involved in Golgi mediated secretion. This is one of four annexins identified in Arabidopsis.		28.5077	28.0672	28.9238	21.7135	22.4014	23.2313	6.05082	3.31308	6	6	6	29.8	29.8	29.8	74.131	299810000	392630000	645850000	516470	914290	1890600	143290000	113400000	178820000	1651800	4279200	6201400	38	AYHSLFDQSMEEDIASHVHGPQR;ILAEAVASSGEEAVEKDEVVR;ILDASLNKDADK;KGEEAYNLIVEVSCTR;SAEDLLGAR;SFFVEDEER
AT1G07400	AT1G07400.1	(HSP17.8)	(HSP17.8)	HSP20-like chaperones superfamily protein;(source:Araport11)		31.9151	31.4526	31.71	30.9922	31.5284	30.8837	0.55782	1.3457	12	12	4	57.3	57.3	23.6	317.3	3181199999.9999995	4103099999.9999995	4455000000	320790000	511200000	380350000	1589899999.9999998	1279900000	1542899999.9999998	1078300000	1382900000	804960000	213	ASMENGVLTVTVPK;EEVKVEIEDDSVLK;ELQFPSSLSGETSAITNAR;ETAEAHVFK;KEEVKVEIEDDSVLK;RSNSIFDPFSLDVWDPFK;SLIPSFFGNNR;SLIPSFFGNNRR;SNSIFDPFSLDVWDPFK;SNSIFDPFSLDVWDPFKELQFPSSLSGETSAITNAR;VDWKETAEAHVFK;VEIEDDSVLK
AT5G46430	AT5G46430.2;AT5G46430.1	RIBOSOMAL PROTEIN EL32Y (EL32Y)	RIBOSOMAL PROTEIN EL32Y (EL32Y)	Ribosomal protein L32e;(source:Araport11)		28.5893	28.2289	28.2432	22.5609	20.9573	24.1435	5.79988	1.9442	4	2	2	29.3	18	18	35.188	317260000	439200000	402950000	0	0	0	215700000	180350000	167770000	0	0	0	16	ASQLDVVVSNK;GVTLMPNVGYGSDK;GVTLMPNVGYGSDKK;TYCAEIAHNISTK
AT3G53870	AT3G53870.1	RIBOSOMAL PROTEIN US3Y (US3Y)	RIBOSOMAL PROTEIN US3Y (US3Y)	Ribosomal protein S3 family protein;(source:Araport11)		28.5377	28.0615	28.7669	23.2647	22.1977	22.6517	5.75062	3.91911	17	3	3	56.6	11.6	11.6	18.87	306120000	391090000	579260000	0	0	1265100	197640000	80926000	229540000	0	0	3925800	30	ACYGVLR;DGYMVSSGQPTK;ELAEDGYSGVEVR;ELTSLVQK;EYIDSAVR;FKDGYMVSSGQPTK;FKFPVDSVELYAEK;FPVDSVELYAEK;FVADGVFYAELNEVLTR;FVMESGAK;GCEVIVSGK;GLCAIAQAESLR;KFVADGVFYAELNEVLTR;RACYGVLR;TPLPDVVIIHSPK;TQNVLGEK;VMLDWDPK
AT3G13120	AT3G13120.3;AT3G13120.2;AT3G13120.1	PLASTID RIBOSOMAL PROTEIN OF THE 30S SUBUNIT 10 (PRPS10)	PLASTID RIBOSOMAL PROTEIN OF THE 30S SUBUNIT 10 (PRPS10);RIBOSOMAL PROTEIN US10C (US10C)	Ribosomal protein S10p/S20e family protein;(source:Araport11)		26.7641	26.8261	26.8916	22.3256	19.7906	21.5282	5.61244	2.06728	2	2	2	11.5	11.5	11.5	4.812	89529000	166100000	157890000	0	0	0	86637000	99614000	97660000	0	0	0	15	SYWVPLIEDSCK;TMGPVPLPTK
AT5G60390	AT5G60390.3;AT5G60390.2;AT5G60390.1;AT1G07940.4;AT1G07940.3;AT1G07940.2;AT1G07940.1;AT1G07930.1;AT1G07920.1;AT1G07930.2	(EF1ALPHA)	(EF1ALPHA)	Alpha subunit of the elongation factor-1 complex. Functions in catalytic delivery of aminoacyl tRNAs to the ribosome during protein synthesis.		31.3408	31.418	31.3053	30.982	31.4101	31.2825	0.129809	0.682197	14	14	14	40.5	40.5	40.5	276.76	2136499999.9999998	4005799999.9999995	3365199999.9999995	318530000	470960000	501470000	817630000	972320000	891850000	592120000	702640000	560590000	258	EVSSYLK;FHINIVVIGHVDSGK;GPTLLEALDQINEPK;GYVASNSKDDPAK;IGGIGTVPVGR;LPLQDVYK;MTPTKPMVVETFSEYPPLGR;NMITGTSQADCAVLIIDSTTGGFEAGISK;QTVAVGVIK;RGYVASNSKDDPAK;STNLDWYK;STTTGHLIYK;VETGMIKPGMVVTFAPTGLTTEVK;YYCTVIDAPGHR
AT1G08110	AT1G08110.3;AT1G08110.2;AT1G08110.1;AT1G08110.4	GLYOXALASE12 (ATGLYI2)	GLYOXALASE12 (ATGLYI2); (GLXI.3); (GLYI2);GLYOXALASE I;3 (GLXI:3)	Encodes a Zn2+ dependent glyoxylase. Enhancement of the glyoxalase pathway under ammonium nutrition is linked mainly to increased GLXI.3 or GLXII.5 transcript level.		22.3569	22.2934	21.9243	21.7992	21.5166	24.5896	-0.443598	0.458108	2	2	2	19.5	19.5	19.5	4.5359	4219600	7176500	0	0	0	0	6324500	6405700	0	0	0	0	3	FEELGVEFAK;TVWTFGQPATIELTHNWGTESDPEFK
AT1G02780	AT1G02780.1	EMBRYO DEFECTIVE 2386 (emb2386)	EMBRYO DEFECTIVE 2386 (emb2386);RIBOSOMAL PROTEIN EL19X (EL19X)	Ribosomal protein L19e family protein;(source:Araport11)		30.1942	29.4407	30.404	23.415	25.0616	24.7974	5.58829	3.01604	5	2	2	29	20.1	20.1	138.51	965010000	1017299999.9999999	1801799999.9999998	1679700	5779500	5598100	580380000	330650000	702650000	3011700	14078000	11601000	58	EKTLSDQFEAK;GPGGDVAPVAAPAPAATPAPTAAVPK;TLSDQFEAK;VLMESIHK;VWLDPNESSDISMANSR
AT1G13730	AT1G13730.2;AT1G13730.1	(ATG3BP2)	(ATG3BP2); (ATG3BP-5)	Nuclear transport factor 2 (NTF2) family protein with RNA binding (RRM-RBD-RNP motifs) domain-containing protein;(source:Araport11)		28.4781	28.0593	28.0483	22.3848	23.256	22.1867	5.58606	3.31466	6	6	6	27.6	27.6	27.6	59.242	293730000	390480000	352010000	0	0	0	92917000	79495000	83573000	0	0	0	42	AINEQIMSFDYEISK;ALESNAPVVDPNTIGNSFVEK;EVEEVIPQVVQPTEQVDEVAEPVTIPTQQPEAK;SPSQVHQFYLDDSVLGRPGSDGEMVSVK;YVADEIVEPEANKK;YYNLLYK
AT2G38770	AT2G38770.1	EMBRYO DEFECTIVE 2765 (EMB2765)	EMBRYO DEFECTIVE 2765 (EMB2765);MOS4-ASSOCIATED COMPLEX 7 (MAC7)	P-loop containing nucleoside triphosphate hydrolases superfamily protein;(source:Araport11)		26.186	26.4018	26.3409	20.284	20.8906	21.3696	5.46149	2.9227	5	5	5	4.6	4.6	4.6	69.013	59973000	123780000	107790000	0	0	0	25631000	39623000	32903000	0	0	0	12	FDLSSSPEANFVR;LGLNFNENTAYTDR;LGQGEQELATDLDFSR;TLIITHSNQALNDLFEK;TVFQELEECR
AT1G09070	AT1G09070.1	SOYBEAN GENE REGULATED BY COLD-2 (SRC2)	SOYBEAN GENE REGULATED BY COLD-2 (SRC2);SOYBEAN GENE REGULATED BY COLD-2 ((AT)SRC2); (ATSRC2)	SRC2 specifically binds the peptide PIEPPPHH, and moves from ER to a vacuole fraction where it gets internalized. Involved in Protein Storage Vacuole targeting. The mRNA is cell-to-cell mobile.		24.9042	25.6243	24.7982	25.5524	27.0596	26.0151	-1.10015	1.23438	3	3	3	15.1	15.1	15.1	15.014	24665000	72213000	37000000	7390600	23086000	13020000	26127000	45245000	34896000	44438000	77961000	40433000	15	LTLVFEIVADRPIAGDKPVGEVSVPVK;LTVDDAAAR;SLDLTIISAEDLK
AT1G20010	AT1G20010.1;AT1G75780.1	TUBULIN BETA-5 CHAIN (TUB5)	TUBULIN BETA-5 CHAIN (TUB5)	beta tubulin		28.0377	27.2521	27.4143	22.5165	22.7417	21.2323	5.40454	2.98619	14	5	3	42.1	15.8	8	71.881	216450000	223170000	226840000	0	0	0	124430000	71692000	82118000	0	0	0	41	EILHIQGGQCGNQIGSK;EVDEQILNIQNK;FPGQLNSDLR;FPGQLNSDLRK;GHYTEGAELIDAVLDVVR;INVYYNEASGGR;IREEYPDR;KLAVNLIPFPR;LAVNLIPFPR;NSSYFVEWIPNNVK;SGPFGQIFRPDNFVFGQSGAGNNWAK;VSDTVVEPYNATLSVHQLVENADECMVLDNEALYDICFR;VSEQFTAMFR;YSGDTADLQLER
AT1G09210	AT1G09210.1	CALRETICULIN 1B (CRT1b)	CALRETICULIN 1B (CRT1b);CALRETICULIN 2 (CRT2); (AtCRT1b)	Encodes one of three Arabidopsis calreticulins.Post-transcriptionally regulates together with CRT1 VAMP721/722 levels under ER stress.		23.0628	23.5136	23.2293	28.2337	27.7177	28.0718	-4.7392	4.94017	6	4	4	15.3	10.8	10.8	15.052	6882800	16719000	12471000	47405000	36430000	54166000	3140900	4199900	3951600	136450000	95579000	132130000	7	GIQTSEDYR;KDDNTAGEWK;LLSGDVDQK;SGSLFDNVLICDDPDYAK;SGSLFDNVLICDDPDYAKK;SVDSEETSEKDATAHDEL
AT1G09270	AT1G09270.3;AT1G09270.2;AT1G09270.1	IMPORTIN ALPHA ISOFORM 4 (IMPA-4)	IMPORTIN ALPHA ISOFORM 4 (IMPA-4)	Protein interacts with Agrobacterium proteins VirD2 and VirE2.		23.0567	24.5322	23.2983	23.4159	22.9869	22.6358	0.616203	0.802314	3	3	3	9.4	9.4	9.4	6.9003	6853900	33873000	13082000	1680800	0	1251200	10985000	11598000	10338000	9500400	0	6783700	3	IQAVIEAGVCPR;LVELLGHQSPTVLIPALR;VVIEQGAVPIFVK
AT1G09310	AT1G09310.1	(SVB2)	SVB-LIKE (SVBL); (SVB2)	ABA responsive trichome formation regulator.		26.89	26.893	26.7455	26.6328	27.0966	26.9308	-0.0438846	0.406559	6	6	6	45.3	45.3	45.3	73.465	97698000	173990000	142690000	15628000	23686000	24561000	49849000	51537000	43690000	71425000	58563000	55730000	32	AEMYTGDEICR;EISMPNGLLPLKDIEEVGYDR;ELLIWVTINEIYTEEPPTK;FTEIDKLVSYGTEVTAIVETGK;GLVTEEVR;LVSYGTEVTAIVETGK
AT4G30800	AT4G30800.1	RIBOSOMAL PROTEIN US17Y (US17Y)	RIBOSOMAL PROTEIN US17Y (US17Y)	Nucleic acid-binding, OB-fold-like protein;(source:Araport11)		26.7633	26.0996	27.4491	21.255	21.6394	21.5615	5.28536	2.8239	6	2	2	33.3	13.8	13.8	10.05	89481000	100390000	232370000	0	0	0	78440000	55700000	159850000	0	0	0	4	CPFTGTVSIR;DYLHFVK;EAIEGTYIDQK;HSNIPAHVSPCFR;RHSNIPAHVSPCFR;VTIGQCRPLSK
AT2G16600	AT2G16600.1;AT2G16600.2	ROTAMASE CYP 3 (ROC3)	ROTAMASE CYP 3 (ROC3);CYCLOPHILIN 19 (CYP19); (ATCYP19-1)	Encodes cytosolic cyclophilin ROC3. The mRNA is cell-to-cell mobile.		27.2068	27.1668	27.2224	21.2154	21.5074	23.1438	5.24318	2.19393	5	5	3	37.6	37.6	32.4	25.184	121690000	210350000	198590000	0	0	0	86430000	92378000	89375000	0	0	0	13	FKDENFIK;FKDENFIKK;FMCQGGDFTAGNGTGGESIYGSK;HVVFGQVVEGLNVVR;IVMELYADTTPETAENFR
AT1G09620	AT1G09620.1	0	0	ATP binding/leucine-tRNA ligases/aminoacyl-tRNA ligase;(source:Araport11)		22.4772	22.4186	22.7884	23.7268	21.7048	24.0733	-0.606927	0.603237	2	2	2	3.4	3.4	3.4	3.2416	4586500	7826700	9187200	0	0	0	8388200	8510400	9393800	0	0	0	3	ATGEGVQPQEYTLIK;NPQEPSCLVELTGYDLIGLPLR
AT1G30380	AT1G30380.1	PHOTOSYSTEM I SUBUNIT K (PSAK)	PHOTOSYSTEM I SUBUNIT K (PSAK)	Encodes subunit K of photosystem I reaction center. The mRNA is cell-to-cell mobile.		28.5162	27.8211	28.8048	21.8007	22.439	25.2846	5.2059	1.79023	3	3	3	38.5	38.5	38.5	175.73	301580000	331060000	594700000	0	0	0	293690000	262530000	508890000	0	0	0	31	DSGLQTGDPAGFTLADTLACGTVGHIIGVGVVLGLK;DSGLQTGDPAGFTLADTLACGTVGHIIGVGVVLGLKNIGAI;FGLAPSANR
AT1G09750	AT1G09750.1	0	0	Eukaryotic aspartyl protease family protein;(source:Araport11)		26.7937	26.6481	26.7487	28.1485	28.2181	28.042	-1.40603	4.72114	4	4	4	5.3	5.3	5.3	25.153	91388000	146820000	143000000	44686000	51532000	53057000	62234000	65037000	69973000	119150000	147510000	109820000	33	FAQPVYEAIR;FAQPVYEAIRDEFR;FAQPVYEAIRDEFRK;ILFDVPNSR
AT1G68830	AT1G68830.1	STT7 HOMOLOG STN7 (STN7)	STT7 HOMOLOG STN7 (STN7)	STN7 protein kinase; required for state transitions, phosphorylation of the major antenna complex (LHCII) between PSII and PSI, and light adaptation. STN7 is involved in state transitions.		26.8051	26.48	26.3051	20.695	20.2042	23.1634	5.17587	1.86383	5	5	5	9.8	9.8	9.8	36.637	92115000	130680000	105150000	0	0	1803700	63066000	55635000	46899000	0	0	13247000	16	DGGFTETQLQELR;IIDLGAAADLR;LGEGSFGVVYK;SDSNLIQFNR;SNEEGEYVLK
AT1G09780	AT1G09780.1	2,3-BIPHOSPHOGLYCERATE-INDEPENDENT PHOSPHOGLYCERATE MUTASE 1 (iPGAM1)	2,3-BIPHOSPHOGLYCERATE-INDEPENDENT PHOSPHOGLYCERATE MUTASE 1 (iPGAM1)	Encodes a 2,3-biphosphoglycerate-independent phosphoglycerate mutase that is involved in pollen development and stomatal movement.		24.2898	24.2439	24.1168	23.6555	23.8042	24.0087	0.394042	1.6749	3	2	2	9.2	6.6	6.6	22.335	16112000	27737000	23071000	1984400	2417600	3240500	12887000	12967000	11740000	13510000	14035000	14693000	6	ALEYEDFDKFDR;RGWDAQVLGEAPHK;YVSESFETNTLHLVGLLSDGGVHSR
AT1G10290	AT1G10290.1	DYNAMIN-LIKE PROTEIN 6 (ADL6)	DYNAMIN-LIKE PROTEIN 6 (ADL6);DYNAMIN-RELATED PROTEIN 2A (DRP2A)	involved in trafficking from the trans-Golgi Network to the central vacuole. The mRNA is cell-to-cell mobile.		30.0742	30.2771	30.4305	29.6213	30.4608	29.6776	0.340732	0.773059	24	24	12	34.8	34.8	19.5	323.31	888020000	1816499999.9999998	1835199999.9999998	124030000	243890000	164860000	150970000	186410000	202510000	117260000	190140000	94771000	135	AKEDMLNQLYSSISAIGNER;ALAAVQALLSNQGPPK;APIIIELSR;ATSPQPDGPTAGGSLK;DKPSPQDKETPEVSGLK;EVVAIASAALDGFK;EVVAIASAALDGFKNEAK;FLLHLAGGEGSGWK;GTITLEECTIEEIPEDEVEK;IESLIQEDQNVK;IESLIQEDQNVKR;KGQDAEQSLLSR;KPIDPEEELR;LCVDEVHR;LGEQLVNSAEGTR;LVDLPGLDQR;QAASLLADEDPDETSSSK;SAVLNSLIGHPVLPTGENGATR;SILTGAPQSK;SQIVQDELAR;TAGPEGEITAGYLMK;VLVDIVSASANATPGLGR;VVASFEGNFPNR;VVLEADGYQPYLISPEK
AT3G53020	AT3G53020.1;AT2G36620.1	SHORT VALVE1 (STV1)	RIBOSOMAL PROTEIN EL24Y (EL24Y);RIBOSOMAL PROTEIN L24 (RPL24); (RPL24B);SHORT VALVE1 (STV1)	RPL24B encodes ribosomal protein L24, homolog of cytosolic RPL24, found in archaea and higher eukaryotes. Arabidopsis has two RPL24 homologs, RPL24A (AT2G36620) and RPL24B. Mutants showed defects in apical-basal gynoecium patterning similar to previously described ett and mp mutants. Transformation of stv1-1 mutant with a uORF-eliminated ETT construct partially suppressed the stv1 gynoecium pheno…		30.1885	29.6576	30.4227	24.8759	24.9224	25.099	5.12387	3.3434	2	2	2	11.7	11.7	11.7	57.835	961250000	1182400000	1825299999.9999998	4623900	5247900	6899700	1279800000	866310000	1336600000	137100000	134380000	140120000	47	KVEFASK;SIVGATLEVIQK
AT5G14670	AT5G14670.3;AT5G14670.2;AT1G10630.1;AT3G62290.3;AT3G62290.2;AT3G62290.1;AT2G47170.3;AT2G47170.2;AT2G47170.1;AT1G70490.7;AT1G70490.6;AT1G70490.5;AT1G70490.4;AT1G70490.3;AT1G70490.2;AT1G70490.1;AT1G23490.1;AT1G10630.2;AT5G14670.1	ADP-RIBOSYLATION FACTOR A1B (ARFA1B)	ADP-RIBOSYLATION FACTOR A1B (ARFA1B);ADP-RIBOSYLATION FACTOR A1B (ATARFA1B)	A member of ARF GTPase family. Arabidopsis has 21 members of this family, known to be essential for vesicle coating and uncoating and functions in GTP-binding. Gene encoding ADP-ribosylation factor and similar to ADP-ribosylation factor DcARF1 (GI:965483) (Daucus carota), other ARFs and ARF-like proteins. The gene is shown to play a role in cell division, cell expansion and cellulose production u…		28.104	27.6118	28.1642	28.0919	27.3745	26.831	0.52753	0.842811	5	5	5	43.1	43.1	43.1	142.39	226630000	286360000	381470000	42967000	28717000	22920000	108430000	94883000	113100000	72428000	66074000	41887000	56	HYFQNTQGLIFVVDSNDRDR;LGEIVTTIPTIGFNVETVEYK;MLNEDELR;NISFTVWDVGGQDK;QDLPNAMNAAEITDK
AT1G10950	AT1G10950.1	TRANSMEMBRANE NINE 1 (TMN1)	(AtTMN1);TRANSMEMBRANE NINE 1 (TMN1);ENDOMEMBRANE PROTEIN 12 (EMP12)	Encodes an Arabidopsis Transmembrane nine (TMN) protein. Transmembrane nine (TM9) proteins are localized in the secretory pathway of eukaryotic cells and are involved in cell adhesion and phagocytosis. Functions in the deposition of rhamnogalacturonan II and I for cell growth.		17.1304	21.6482	21.5823	27.657	27.2658	28.0517	-7.53789	1.76168	4	3	3	7.5	6.1	6.1	5.9267	0	0	0	31784000	26633000	53418000	0	0	0	53213000	132290000	171630000	5	LVHGDVFR;NWSGAPNNPCR;SVICPLELDEAK;YAREDDDLESLER
AT1G11840	AT1G11840.4;AT1G11840.3;AT1G11840.2;AT1G11840.1;AT1G11840.6	GLYOXALASE I HOMOLOG (GLX1)	GLYOXALASE I HOMOLOG (GLX1);GLYOXALASEI 3 (ATGLYI3)	Encodes Ni+ dependent glyoxalase I homolog ATGLX1.		22.6648	23.7426	23.1585	24.6515	24.9303	24.795	-1.60361	1.83465	4	4	3	17.7	17.7	12	16.483	5223700	19595000	11874000	3957800	5276600	5588800	9151100	11951000	10917000	0	0	0	6	DPDGYTFELIQR;GNAYAQIAIGTDDVYK;IVSFLDPDGWK;TVLVDNKDFLK
AT1G11860	AT1G11860.1;AT1G11860.2;AT1G11860.3	(GLDT)	(GLDT)	T-protein is the aminomethyltransferase of the glycine cleavage multienzyme system GCS.		26.3364	27.079	26.8365	27.7981	27.3901	26.7831	-0.573119	1.00135	5	5	5	17.4	17.4	17.4	51.042	66562000	197930000	151980000	35049000	29030000	22171000	35967000	64817000	61158000	89524000	107570000	63900000	17	DSIMDSTVNCR;GGDVSWHIHDER;IGEITSGGFSPNLK;TGYTGEDGFEISVPDEHAVDLAK;VGFFSSGPPAR
AT1G12000	AT1G12000.1	0	0	Phosphofructokinase family protein;(source:Araport11)		22.1979	24.0606	21.9251	21.3548	23.1895	23.7387	-0.0330932	0.31211	3	3	3	10.4	10.4	10.4	17.72	3779400	24428000	5050200	0	0	0	8974900	11649000	8209000	0	0	0	4	AASHITLECALQTHPNITIIGEEVSAQK;IVEGPASSAAGNPDEIAK;YVELNAEYIQPYR
AT1G12840	AT1G12840.1	DE-ETIOLATED 3 (DET3)	DE-ETIOLATED 3 (DET3);ARABIDOPSIS THALIANA VACUOLAR ATP SYNTHASE SUBUNIT C (ATVHA-C)	Encodes subunit C of the vacuolar H(+)-ATPase (V-ATPase). Bound and phosphorylated by AtWNK8. The mRNA is cell-to-cell mobile.		23.0655	25.3797	23.3673	25.7396	26.7681	26.6695	-2.45488	1.52461	5	5	5	16.3	16.3	16.3	52.778	6895900	60951000	13723000	8414500	18862000	20492000	8587100	13220000	10752000	28900000	38052000	32153000	14	DFEQSVEAQETR;FNIPNLR;HSFDTPVYR;ISGVESNALTVDGVPVDSYLTR;SNSFVEGVSQK
AT1G12900	AT1G12900.4;AT1G12900.3;AT1G12900.1;AT1G12900.5	0	0	glyceraldehyde 3-phosphate dehydrogenase A subunit 2;(source:Araport11)		27.3653	28.3123	27.603	28.6474	28.2702	28.7873	-0.808095	1.36835	17	6	5	65.4	31.1	20.6	166.99	135820000	465340000	258530000	63146000	53427000	88946000	162910000	207180000	110710000	191760000	188010000	184440000	46	AAALNIVPTSTGAAK;AVALVLPNLK;DSPLDVVVINDTGGVK;GDIPTYVVGVNAELYSHEDTIISNASCTTNCLAPFVK;GILDVCDEPLVSVDFR;GKLNGIALR;GTMTTTHSYTGDQR;IVSDRNPSNLPWGELGIDLVIEGTGVFVDR;KDSPLDVVVINDTGGVK;KTFAEEVNAAFR;NPSNLPWGELGIDLVIEGTGVFVDR;TFAEEVNAAFR;VIAWYDNEWGYSQR;VPTPNVSVVDLVVQVSK;VPTPNVSVVDLVVQVSKK;VVDLADIVANNWK;YDSTLGIFDADVKPSGDSALSVDGK
AT1G12900	AT1G12900.4;AT1G12900.3;AT1G12900.1;AT1G12900.5	0	0	glyceraldehyde 3-phosphate dehydrogenase A subunit 2;(source:Araport11)		23.621	24.726	23.5596	24.9983	24.9526	25.9201	-1.32148	1.54429	17	6	5	65.4	31.1	20.6	166.99	135820000	465340000	258530000	63146000	53427000	88946000	162910000	207180000	110710000	191760000	188010000	184440000	46	AAALNIVPTSTGAAK;AVALVLPNLK;DSPLDVVVINDTGGVK;GDIPTYVVGVNAELYSHEDTIISNASCTTNCLAPFVK;GILDVCDEPLVSVDFR;GKLNGIALR;GTMTTTHSYTGDQR;IVSDRNPSNLPWGELGIDLVIEGTGVFVDR;KDSPLDVVVINDTGGVK;KTFAEEVNAAFR;NPSNLPWGELGIDLVIEGTGVFVDR;TFAEEVNAAFR;VIAWYDNEWGYSQR;VPTPNVSVVDLVVQVSK;VPTPNVSVVDLVVQVSKK;VVDLADIVANNWK;YDSTLGIFDADVKPSGDSALSVDGK
AT1G13440	AT1G13440.1;AT1G13440.2	GLYCERALDEHYDE-3-PHOSPHATE DEHYDROGENASE C2 (GAPC2)	GLYCERALDEHYDE-3-PHOSPHATE DEHYDROGENASE C-2 (GAPC-2);GLYCERALDEHYDE-3-PHOSPHATE DEHYDROGENASE C2 (GAPC2)	The expression level of GAPC-2 is upregulated in Arabidopsis seedlings exposed to cadmium.		27.2453	27.3062	27.6593	28.9503	28.9892	27.8545	-1.19436	1.44476	13	1	1	51.8	8	8	110.91	124980000	231690000	268820000	77898000	87943000	46591000	181480000	202940000	244400000	465470000	453830000	190680000	26	AASFNIIPSSTGAAK;AATYDEIKK;DAPMFVVGVNEHEYK;GILGYTEDDVVSTDFVGDNR;KVVISAPSK;LTGMSFR;LVSWYDNEWGYSSR;NPEDIPWGEAGADFVVESTGVFTDKDK;SDLDIVSNASCTTNCLAPLAK;TLLFGEKPVTVFGIR;VPTVDVSVVDLTVR;VVISAPSK;YDSVHGQWK
AT4G27740	AT4G27740.1	0	0	Yippee family putative zinc-binding protein;(source:Araport11)		26.3985	26.071	25.7105	20.6793	22.2951	20.232	4.99118	2.3054	3	3	3	22.9	22.9	22.9	22.098	69488000	98418000	69633000	0	0	0	36106000	36025000	37127000	0	0	0	16	NCENPLALGEDLISK;NCENPLALGEDLISKK;YVETFDLK
AT1G13930	AT1G13930.3;AT1G13930.2;AT1G13930.1	0	0	Involved in response to salt stress. Knockout mutants are hypersensitive to salt stress. The mRNA is cell-to-cell mobile.		25.3641	27.1593	26.3915	28.71	28.2999	28.0702	-2.05506	1.64221	4	4	4	46.5	46.5	46.5	45.533	33927000	209260000	111640000	65949000	54538000	54107000	35181000	98394000	67020000	200020000	178330000	141370000	39	KDDEESGGGLGGYAK;SSTGQYLDK;VAGASADILDAAEK;YLNDYESSHSTGAGGPPPPTSQAEPASQPEPAAK
ATCG00750	ATCG00750.1	RIBOSOMAL PROTEIN S11 (RPS11)	RIBOSOMAL PROTEIN US11C (US11C);RIBOSOMAL PROTEIN S11 (RPS11)	30S chloroplast ribosomal protein S11		30.3711	29.2413	30.1695	25.9937	27.3116	21.6711	4.93519	1.31944	5	5	5	42	42	42	78.572	1090900000	886020000	1531499999.9999998	10035000	27491000	641090	964030000	559960000	1005499999.9999999	41606000	60851000	2480800	56	AVVDQGMQR;GTPFAAQTAAGNAIR;GVIHVQASFNNTIVTVTDVR;RGTPFAAQTAAGNAIR;VISWSSAGTCGFR
AT5G39850	AT5G39850.1	RIBOSOMAL PROTEIN US4Y (US4Y)	RIBOSOMAL PROTEIN US4Y (US4Y)	Ribosomal protein S4;(source:Araport11)		27.2962	27.0176	27.2036	22.6073	24.7078	19.5283	4.89131	1.38444	11	4	4	42.6	28.9	28.9	21.154	129470000	189680000	196010000	0	0	0	112910000	76671000	106380000	0	0	0	26	ELLTLDEK;HVDFSLTSPFGGGRPGR;IFEGEALLR;IFEGEALLRR;LDYVLALTVENFLER;LQTIVFK;LVGEYGLR;RIFEGEALLR;RLQTIVFK;VQYTLSR;YGLLDETQNKLDYVLALTVENFLER
AT1G14410	AT1G14410.1	WHIRLY 1 (WHY1)	A. THALIANA WHIRLY 1 (ATWHY1); (PTAC1);WHIRLY 1 (WHY1)	Encodes a homolog of the potato p24 protein. Binds single strand telomeric repeats. Negatively regulates telomerase activity and telomere length.		25.5345	25.2339	25.0435	28.2108	28.9172	28.2266	-3.18092	3.37973	5	5	4	27	27	22.8	15.335	38179000	55090000	43856000	46657000	83665000	60302000	29009000	25621000	25719000	65766000	125230000	74917000	20	APEFVALDSGAFK;ESCEFFHDPFK;FGDSSSSPSPAEGLPAR;LVNVDESIYIPITR;VNNASPNYGGDYEWNR
AT1G14810	AT1G14810.1	0	0	encodes an aspartate semialdehyde dehydrogenase, which produces the branch point intermediate for lysine and threonine/methionine biosynthesis		23.6342	24.7238	23.854	26.3268	26.67	26.881	-2.55525	2.45741	3	3	3	14.1	14.1	14.1	18.345	10228000	38683000	19229000	12641000	17622000	23728000	6712600	18579000	7671500	32507000	37540000	36281000	12	AHAESVNLQFENPLDENTAR;ASNTFPTPLDVSNKDDVAVGR;GTIVVDNSSAFR
AT1G14830	AT1G14830.1	DYNAMIN-LIKE 1C (DL1C)	DYNAMIN-LIKE 1C (ADL1C);ARABIDOPSIS DYNAMIN-LIKE PROTEIN 5 (ADL5);DYNAMIN RELATED PROTEIN 1C (DRP1C);DYNAMIN-LIKE 1C (DL1C)	Encodes a dynamin-like protein that is involved in mitochondrial morphogenesis and pollen development. Protein is localized as speckles in the cytoplasm, partially co-localizes with mitochondrial markers, cell plate of dividing cells, and the tip of root hairs, root cap cells, and expanding part of trichoblasts.		28.177	27.9319	27.9853	26.8839	27.4926	26.7618	0.985325	1.72049	14	11	11	32.2	27	27	67.856	238400000	357500000	336970000	18599000	31166000	21846000	75025000	71517000	72442000	35374000	51031000	23065000	46	DDIDAVAWK;EHLDGGRPGGDR;FADFAAVR;GTDCLDVLEGR;LIDGSISYFK;LQHPWVGIVNR;NAPAPNADPYSDNHFR;QISNIPIQLSIYSPNVVNLTLIDLPGLTK;RFPTLASDIAAAANEALER;SIDEINAELDR;SISETEELKR;SSVLESVVGR;SYVEKPNCIILAISPANQDIATSDAIK;TEDGTTEYAEFLHAPK
ATCG00330	ATCG00330.1	CHLOROPLAST RIBOSOMAL PROTEIN S14 (RPS14)	RIBOSOMAL PROTEIN US14C (US14C);CHLOROPLAST RIBOSOMAL PROTEIN S14 (RPS14)	30S chloroplast ribosomal protein S14		28.0262	27.8073	28.4629	23.203	22.1672	24.4427	4.82782	2.19928	3	3	3	31	31	31	24.637	214740000	327910000	469200000	0	777310	0	85411000	130070000	136190000	0	13379000	0	22	CFSTGRPR;DFGLSGHILR;EMVQACLLPGATR
AT1G15690	AT1G15690.1	(AVP1)	(ATAVP1); (VHP1);FUGU 5 (FUGU5); (AtVHP1;1); (AVP-3);ARABIDOPSIS THALIANA V-PPASE 3 (ATAVP3); (AVP1)	Encodes a H(+)-translocating (pyrophosphate-energized) inorganic pyrophosphatase (H(+)-PPase; EC 3.6.1.1) located in the vacuolar membrane. Expression is found in all tissues examined, including meristems and floral organ primordium. Expression is particularly enhanced in pollen, and is repressed by light. Over expression and loss of function phenotypes suggest AVP1 is involved in regulation of a…		22.1255	21.994	23.3085	22.8922	25.0016	24.0084	-1.49141	1.21192	3	3	3	6.8	6.8	6.8	7.4228	3594400	5831300	13175000	1169100	5544200	3239900	7730500	9046400	6068000	9226900	18673000	9480300	6	AAVIGDTIGDPLKDTSGPSLNILIK;TDALDAAGNTTAAIGK;YIEAGVSEHAK
AT1G15820	AT1G15820.1	LIGHT HARVESTING COMPLEX PHOTOSYSTEM II SUBUNIT 6 (LHCB6)	LIGHT HARVESTING COMPLEX PHOTOSYSTEM II SUBUNIT 6 (LHCB6); (CP24)	Lhcb6 protein (Lhcb6), light harvesting complex of photosystem II.		30.1518	29.6268	29.9596	30.4681	30.3086	30.7321	-0.590221	1.67406	11	11	11	46.9	46.9	46.9	214.63	937050000	1157400000	1324100000	223070000	219480000	342420000	434100000	328540000	377060000	544110000	393470000	495980000	93	DGVYEPDFEK;DGVYEPDFEKLER;EAELIHGR;FFDPLGLAGK;GGGNFLDPEWLDGSLPGDFGFDPLGLGKDPAFLK;KSWIPAVK;NRDGVYEPDFEK;NRDGVYEPDFEKLER;TAENFANYTGDQGYPGGR;TPLGALGL;WVDFFNPDSQSVEWATPWSK
AT1G15930	AT1G15930.2;AT1G15930.1	RIBOSOMAL PROTEIN ES12Z (ES12Z)	RIBOSOMAL PROTEIN ES12Z (ES12Z)	Ribosomal protein L7Ae/L30e/S12e/Gadd45 family protein;(source:Araport11)		23.1147	23.8811	23.2437	23.1598	24.481	24.9283	-0.776551	0.852468	2	1	1	19.4	12.5	12.5	10.85	7134900	21570000	12596000	0	0	0	9562100	19209000	11643000	0	0	0	4	TLGEWAGLCK;VAQLVVLAEDCNQPDYVK
AT1G16030	AT1G16030.1	HEAT SHOCK PROTEIN 70B (Hsp70b)	HEAT SHOCK PROTEIN 70B (Hsp70b);HEAT SHOCK PROTEIN 70-5 (HSP70-5)	heat shock protein 70B;(source:Araport11)		28.6223	29.1405	28.6849	28.8433	28.7622	28.8856	-0.0144723	0.328687	23	17	17	45.5	34.7	34.7	323.31	324600000	826190000	547270000	72332000	75139000	95216000	79313000	105730000	81302000	105230000	128270000	77736000	117	AIDETIEWIEGNQLAEVDEFEYK;ATAGDTHLGGEDFDNR;DNNLLGTFELK;ELEGICNPIISK;EQVFSTYADNQPGVLIQVYEGER;EVAEAFLGR;FSDPSVQSDILHWPFK;IINEPTAAAIAYGLDK;IINEPTAAAIAYGLDKK;IQQLLQDFFNGK;KFSDPSVQSDILHWPFK;LKELEGICNPIISK;LSKEEIEK;MKEVAEAFLGR;NAVVTVPAYFNDSQR;NQVALNPQNTVFDAK;NSLENYAYNMR;NVLIFDLGGGTFDVSLLTIEEGVFEVK;SINPDEAVAYGAAVQAAILTGEGSEK;SSVHDVVLVGGSTR;TTPSYVAFTDTER;VEIIPNDQGNR;YKAEDEQVKK
AT1G16210	AT1G16210.1	0	0	coiled-coil protein;(source:Araport11)		21.6285	21.1138	21.2836	24.9202	26.2137	25.427	-4.17831	2.77283	2	2	2	8.5	8.5	8.5	2.6883	2546900	3168100	3237400	4768100	0	8660800	4050800	3344800	3478700	23271000	0	12105000	2	AYEEVELPR;RREEDQVALAK
AT5G04990	AT5G04990.1	SAD1/UNC-84 DOMAIN PROTEIN 1 (SUN1)	ARABIDOPSIS SAD1/UNC-84 DOMAIN PROTEIN 1 (ATSUN1);SAD1/UNC-84 DOMAIN PROTEIN 1 (SUN1)	Encodes a member of the Sad1/UNC-84 (SUN)-domain proteins: AtSUN1(At5g04990), AtSUN2(AT3G10730). SUN domain proteins are part of the cytoskeletal-nucleoskeletal bridging complexes. AtSUN1 and AtSUN2 are localized to the nuclear envelope and are present as homomers and heteromers in vivo.Encodes an outer nuclear membrane protein that anchors RanGAP1 to the nuclear envelope. It interacts with WPP d…		27.0876	26.5371	27.2266	21.66	21.9882	22.7693	4.81129	3.51581	5	5	5	16.3	16.3	16.3	126.95	112040000	135950000	199160000	0	0	0	44253000	35367000	47291000	0	0	0	25	APDPVPVVGTNLDQDSSPESE;GNVDDSAFSEISIDELR;KGNVDDSAFSEISIDELR;LDFTSNHGSDSHTCIYR;SNAQTFNILESSSSGLIDTVR
AT1G16880	AT1G16880.1	ACT DOMAIN REPEATS 11 (ACR11)	ACT DOMAIN REPEATS 11 (ACR11)	Encodes a ACT domain-containing protein. The ACT domain, named after bacterial aspartate kinase, chorismate mutase and TyrA (prephenate dehydrogenase), is a regulatory domain that serves as an amino acid-binding site in feedback-regulated amino acid metabolic enzymes. The mRNA is cell-to-cell mobile.		23.1934	25.5323	24.2034	25.4823	24.8344	24.3465	-0.578036	0.601701	3	3	3	18.3	18.3	18.3	24.164	7535000	67748000	24499000	7039900	0	4095400	13178000	19315000	19402000	20536000	0	12736000	14	IISDISVAVESGEFDTEGLLAK;KVEDPELLEAIR;SLLFIESADRPGLLVELVK
AT1G17290	AT1G17290.1	ALANINE AMINOTRANSFERASE (AlaAT1)	ALANINE AMINOTRANSFERASE (AlaAT1)	Encodes for alanine aminotransferase (ALAAT1), involved in alanine catabolism during plants recovery from hypoxia The mRNA is cell-to-cell mobile.		23.6989	23.0177	22.7931	23.1153	24.8397	22.1925	-0.21261	0.389427	3	2	2	9.6	7.9	7.9	29.174	0	11856000	9216900	0	4955400	0	0	20006000	16117000	0	16826000	0	3	AIAAAEAEK;ALAVINPGNPTGQVLSEENQR;QEGLVLLADEVYQENVYVPDKK
AT1G18080	AT1G18080.1	(ATARCA)	(ATARCA);RECEPTOR FOR ACTIVATED C KINASE 1 A (RACK1A_AT);RIBOSOMAL PROTEIN RACK1Z (RACK1Z);SUPPRESSOR OF ACAULIS 53 (SAC53); (ATRACK1); (RACK1A)	Encodes the Arabidopsis thaliana homolog of the tobacco WD-40 repeat ArcA gene. It is a scaffold protein that acts downstream of and is phosphorylated by WNK8 in the glucose responsiveness and flowering pathways . Knockout mutants show insensitivity to gibberellin in GA-induced seed germination.		25.5715	26.1379	25.9421	26.7042	27.378	27.5119	-1.3142	2.09345	4	4	4	18.7	18.7	18.7	12.368	39172000	103090000	81761000	16421000	28787000	36744000	37037000	52402000	47380000	71286000	115740000	92477000	14	DVLSVAFSLDNR;LWDLAAGVSTR;SIVEDLKVDLK;STLAGHTGYVSTVAVSPDGSLCASGGK
AT2G03640	AT2G03640.5;AT2G03640.3;AT2G03640.1;AT2G03640.2;AT2G03640.4	(ATG3BP4)	(ATG3BP4); (ATG3BP-7); (ATG3BP-6)	Nuclear transport factor 2 (NTF2) family protein with RNA binding (RRM-RBD-RNP motifs) domain-containing protein;(source:Araport11)		27.5189	27.1907	27.6651	21.7832	21.8052	24.8505	4.64526	1.67155	7	7	7	24.2	24.2	24.2	37.146	151080000	213870000	269900000	0	0	0	61779000	44154000	57609000	0	0	0	28	FSQSFFLVSR;FYLEDSMISRPGLDGEIVTIK;GINDQIMSIDYK;IEILTADSQSTLK;NCIGFVAFENGEAVK;NGVVTLVTGLVIGNDGGR;YVSDEFVEPEATK
AT5G48900	AT5G48900.1	(ATPLL21)	(ATPLL21)	Pectate lyase		27.0225	25.8282	26.7383	22.1957	21.7534	21.7747	4.62171	2.93066	6	4	3	18.2	10.6	8.4	37.951	107090000	83172000	141980000	0	583490	0	68916000	40132000	84038000	0	9895600	0	14	HAVIQEEPLWIVFK;SEGDLFLNGAFFTR;SSPSHYGWR;VMQVTIAYNHFGEGLIQR;YYVVSDPNDDNPVNPK;YYVVSDPNDDNPVNPKPGTLR
AT3G02560	AT3G02560.3;AT3G02560.2;AT3G02560.1	RIBOSOMAL PROTEIN ES7Y (ES7Y)	RIBOSOMAL PROTEIN ES7Y (ES7Y)	Ribosomal protein S7e family protein;(source:Araport11)		29.4507	28.7918	28.9846	23.9231	24.7105	25.1218	4.49056	3.19763	7	4	4	34.6	24.6	24.6	232.19	576400000	648830000	673620000	2388900	4531100	0	298030000	217130000	297800000	4060500	6198600	0	49	AVVIYVPFR;DKGVAPTEFEEQVTQALFDLENTNQELK;DVIFVATR;DVVFEYPVIEA;GVAPTEFEEQVTQALFDLENTNQELK;KAVVIYVPFR;LETMVGVYR
AT1G19570	AT1G19570.1	DEHYDROASCORBATE REDUCTASE (DHAR1)	DEHYDROASCORBATE REDUCTASE (DHAR1);DEHYDROASCORBATE REDUCTASE 5 (DHAR5); (ATDHAR1)	Encodes a member of the dehydroascorbate reductase gene family. Critical for a mutualistic symbiosis between the host Arabidopsis and the root colonizing fungus Piriformospora indica.Encodes about 50-60% of extractable leaf GSH-dependent DHAR activity, but single knockout mutants show unaltered ascorbate and glutathione status in optimal and oxidative stress conditions (PMID:28381499). Acts redun…		24.2703	26.5266	25.0971	26.7606	26.1505	27.2423	-1.41978	1.12096	8	8	8	51.6	51.6	51.6	26.237	15895000	134970000	45517000	17075000	12294000	30480000	9666600	28745000	12312000	46377000	25111000	65074000	20	AAVGAPDHLGDCPFSQR;IDDKWVTDSDVIVGILEEK;IDDKWVTDSDVIVGILEEKYPDPPLK;IHLINLSDKPQWFLDISPQGK;SHDGPFIAGER;SKDSNDGSEHALLVELEALENHLK;VSAVDLSLAPK;WVTDSDVIVGILEEKYPDPPLK
ATCG01230	ATCG01230.1;ATCG00905.1	RIBOSOMAL PROTEIN S12B (RPS12B)	RIBOSOMAL PROTEIN S12 (RPS12);RIBOSOMAL PROTEIN S12B (RPS12B)	chloroplast gene encoding ribosomal protein s12. The gene is located in three distinct loci on the chloroplast genome and is transpliced to make one transcript.		29.8868	29.5888	30.2255	25.783	25.7975	24.6948	4.47527	3.05753	2	2	2	42.4	42.4	42.4	176.03	779840000	1127300000	1592099999.9999998	8671500	9625200	5213700	732740000	676470000	970020000	28451000	27021000	37288000	50	GTLDAVGVK;LTSGFEITAYIPGIGHNLQEHSVVLVR
AT1G20020	AT1G20020.2;AT1G20020.3;AT1G20020.1	FERREDOXIN-NADP(+)-OXIDOREDUCTASE 2 (FNR2)	LEAF FNR 2 (ATLFNR2);LEAF-TYPE CHLOROPLAST-TARGETED FNR 2 (LFNR2);FERREDOXIN-NADP(+)-OXIDOREDUCTASE 2 (FNR2)	Encodes a leaf-type ferredoxin:NADP(H) oxidoreductase. It is present in both chloroplast stroma and thylakoid membranes but is more abundant in the stroma The mRNA is cell-to-cell mobile.		23.8068	24.6564	23.9865	26.0192	26.0631	26.6	-2.07752	2.7042	3	3	3	15.3	15.3	15.3	20.381	11528000	36919000	21078000	10214000	11571000	19528000	10976000	23599000	13021000	43280000	32926000	34721000	7	GVCSNFLCDLAPGSDVK;KAEQWNVEVY;LVYTNDQGETVK
AT1G76030	AT1G76030.1;AT1G20260.1	V-ATPASE B SUBUNIT 1 (VAB1)	(ATVAB1);V-ATPASE B SUBUNIT 1 (VAB1)	One of three genes encoding the vacuolar ATP synthase subunit B1. This subunit was shown to interact with the gene product of hexokinase1 (ATHXK1). This interaction, however, is solely restricted to the nucleus. The protein binds to and co-localizes with F-actin, bundles F-actin to form higher-order structure, and stabilizes actin filaments in vitro. The mRNA is cell-to-cell mobile.		27.2071	27.2473	27.1857	28.3035	27.8464	28.1273	-0.879048	1.98759	9	9	2	27	27	5.3	79.44	121710000	222420000	193590000	49755000	39828000	56289000	66014000	74521000	69969000	72499000	101040000	43217000	54	AVVQVFEGTSGIDNK;FTTVQFTGEVLK;IALTTAEYLAYECGK;IFNGSGKPIDNGPPILPEAYLDISGSSINPSER;RGQVLEVDGEK;TLDQFYSR;TVSGVAGPLVILDK;VTLFLNLANDPTIER;YQEIVNIR
AT1G20440	AT1G20440.1	COLD-REGULATED 47 (COR47)	COLD-REGULATED 47 (COR47); (RD17); (AtCOR47)	Belongs to the dehydrin protein family, which contains highly conserved stretches of 7-17 residues that are repetitively scattered in their sequences, the K-, S-, Y- and lysine rich segments. Cold regulated gene, amino acid sequence homology with Group II LEA (late embryogenesis abundant) proteins. Also responds to osmotic stress, ABA, dehydration and inhibits e.coli growth while overexpressed. C…		24.5306	26.0299	25.6966	25.8254	27.363	27.325	-1.41875	1.27484	7	7	7	47.2	47.2	47.2	82.728	19038000	95653000	68968000	8929600	28489000	32279000	15097000	46111000	30689000	26390000	44168000	71217000	20	AEEYKNNVPEHETPTVATEESPATTTEVTDR;AQISEPELAAEHEEVK;AQISEPELAAEHEEVKENK;ITLLEELQEKTEEDEENKPSVIEK;KEEEVKPQETTTLESEFDHK;TAEDDVPVSTTIPVPVSESVVEHDHPEEEK;TAEDDVPVSTTIPVPVSESVVEHDHPEEEKK
AT1G20450	AT1G20450.2;AT1G20450.1	EARLY RESPONSIVE TO DEHYDRATION 10 (ERD10)	LOW TEMPERATURE INDUCED 29 (LTI29);LOW TEMPERATURE INDUCED 45 (LTI45);EARLY RESPONSIVE TO DEHYDRATION 10 (ERD10)	Encodes a gene induced by low temperature and dehydration. Inhibits e.coli growth while overexpressed. Belongs to the dehydrin protein family, which contains highly conserved stretches of 7-17 residues that are repetitively scattered in their sequences, the K-, S-, Y- and lysine rich segments. LTI29 and LTI30 double overexpressors confer cold tolerance. Localized to membranes and cytoplasm.		22.1286	24.3091	23.0563	22.7055	22.9855	25.536	-0.577655	0.501505	3	3	3	19.7	19.7	19.7	15.672	3602000	29019000	11062000	1027200	1370600	9340600	5115300	10106000	7909500	26084000	11101000	28539000	4	KPEDSQVVNTTPLVETATPIADIPEEK;TVEEENQGVMDR;VATEESSAPEIK
AT1G20620	AT1G20620.2;AT1G20620.5;AT1G20620.1;AT1G20620.6;AT1G20620.4;AT1G20620.7	REPRESSOR OF GSNOR1 (ROG1)	REPRESSOR OF GSNOR1 (ROG1)	Catalase, catalyzes the breakdown of hydrogen peroxide (H2O2) into water and oxygen.The mRNA is cell-to-cell mobile.It is a target for SUMOlaytion (PMID: 21413927).Transnitrosylates GSNOR1 and mutants suppress the gnsnor1 phenotype.		29.6494	30.2747	29.7817	30.0995	30.3334	30.4127	-0.379946	1.06098	15	15	12	46.4	46.4	36.1	128.88	661490000	1813499999.9999998	1170500000	172780000	223280000	274410000	233970000	350240000	233250000	270160000	335510000	284640000	116	APGVQTPVIVR;CAEKVPTPTNSYTGIR;DEEINYYPSK;DGIQFPDVVHALK;DGIQFPDVVHALKPNPK;DLHDAIASGNYPEWK;GFFEVTHDISNLTCADFLR;GPVLLEDYHLIEK;IFAYGDTQR;IWPEDILPLQPVGR;LFIQTMDPADEDKFDFDPLDVTK;LGPNYLQLPVNAPK;TIDNFFNETEQLAFNPGLVVPGIYYSDDK;TNIQEYWR;VPTPTNSYTGIR
AT1G20950	AT1G20950.1	0	0	Phosphofructokinase family protein;(source:Araport11)		23.8116	24.0728	23.7546	25.1167	24.4042	25.1175	-0.999766	1.72958	3	3	3	8.1	8.1	8.1	6.1492	11566000	24636000	17949000	0	3664200	6988600	7520500	9704700	9754200	0	16374000	14382000	4	ETAQVPDAHIITELPSVR;NPGPLQYDGPGADAK;STLLGFLGGSEGLFAQK
AT4G09150	AT4G09150.1;AT4G09150.2	0	0	T-complex protein 11;(source:Araport11)		29.1928	28.5323	29.0399	24.7034	23.3444	25.3618	4.4518	2.26408	17	17	17	19.1	19.1	19.1	72.262	482060000	541990000	699930000	4102800	1757800	8278000	123660000	88781000	102320000	2067000	1225600	3190400	79	ALFSETDGAR;ASNVENINHLLK;AWCSYLEGFVVWK;AYHELGINEK;EFELLVK;EVRDELCEISPK;GRGEHEIALVESATCLIR;HGSPDQASSSLPLTK;IIDSGLNQK;LGGISLSFPVNEEDTVTTTSPK;LSAPANEEEIR;QSQPDFSWVIK;SGSIEELSQR;SVHGLWYEELLK;TQESELSEVSK;VNTPSSPFPGIELSECK;VNTPSSPFPGIELSECKGETVDLLVR
AT1G21750	AT1G21750.1;AT1G21750.2	PDI-LIKE 1-1 (PDIL1-1)	PDI-LIKE 1-1 (ATPDIL1-1);ARABIDOPSIS THALIANA PROTEIN DISULFIDE ISOMERASE 5 (ATPDI5);PROTEIN DISULFIDE ISOMERASE 5 (PDI5);PDI-LIKE 1-1 (PDIL1-1)	Encodes a protein disulfide isomerase-like (PDIL) protein, a member of a multigene family within the thioredoxin (TRX) superfamily; isoform contains non-consensus GA donor splice site at intron 9. Transcript levels for this gene are up-regulated in response to three different chemical inducers of ER stress (dithiothreitol, beta-mercaptoethanol, and tunicamycin). Neither AtIRE1-2 nor AtbZIP60 appe…		23.0885	24.7789	22.4184	27.5722	27.5172	28.0387	-4.28075	1.97515	7	7	6	19	19	16.4	38.261	7006700	40190000	7108900	29970000	31702000	52938000	3768600	9404900	12759000	46655000	35039000	76205000	12	AVQEYNGPR;DFDGEALEK;KEEETTEEVKDEL;LAPILDEVAVSYQSDSSVVIAK;LFKPFDEQFVDSK;SASGNVVVYEGDR;VVVSDSLDDIVLNSGK
AT1G22060	AT1G22060.2;AT1G22060.1	0	0	sporulation-specific protein;(source:Araport11)		23.039	21.9303	21.6773	22.5136	23.8978	20.6312	-0.132054	0.343323	2	2	2	1.6	1.6	1.6	6.6069	0	5579400	4253000	0	0	0	0	4612000	3945300	0	0	0	3	AQDFSQILISEIGSGDHLVR;LNSEVSELADK
AT1G22300	AT1G22300.2;AT1G22300.1;AT1G22300.3	GENERAL REGULATORY FACTOR 10 (GRF10)	GENERAL REGULATORY FACTOR 10 (GRF10); (GF14 EPSILON);14-3-3 PROTEIN G-BOX FACTOR14 EPSILON (14-3-3EPSILON)	Encodes a 14-3-3 protein. This protein is reported to interact with the BZR1 transcription factor involved in brassinosteroid signaling and may affect the nucleocytoplasmic shuttling of BZR1. Might act as a stabilization factor to mediate the oligomerization of REM on the plasma membrane.		24.1768	22.7512	23.1585	27.5898	27.4322	27.3756	-4.10367	2.33376	6	6	6	29.5	29.5	29.5	44.935	14898000	9856100	11874000	30337000	29888000	33431000	11288000	14830000	17866000	103970000	100750000	56384000	15	AAVAAAENGLAPTHPVR;DNLTLWTSDLNEEGDER;EAADQSLEAYK;ILSSIEQK;VCNDILSVIDK;YLAEFSSGAER
AT1G22530	AT1G22530.2;AT1G22530.1	PATELLIN 2 (PATL2)	PATELLIN 2 (PATL2)	PATLs belong to a family of proteins having a Golgi dynamics (GOLD) domain in tandem with the Sec14p-like domain. PATLs are auxin regulated. Quadruple mutants (patl2456) show altered PIN1 lateralization in root endodermis cells.		23.8853	25.1413	24.4418	24.5941	25.7925	24.2441	-0.387412	0.559575	4	3	3	10.2	8.6	8.6	31.955	12172000	51668000	28900000	3803600	9591800	3814700	16715000	16551000	23037000	14847000	26095000	11559000	4	DSPFTVEDGVTEAVVK;IDDLVSEDLEGSEFEK;TFGSIITSPR;VVSEVAVPETEVTAVKEEEVATGK
AT4G15000	AT4G15000.2;AT4G15000.1;AT3G22230.1	RIBOSOMAL PROTEIN EL27X (EL27X)	RIBOSOMAL PROTEIN EL27X (EL27X)	Ribosomal L27e protein family;(source:Araport11)		27.7748	27.0753	27.7967	21.6086	23.0353	24.6578	4.44839	1.82328	3	3	3	22.9	22.9	22.9	15.815	180400000	197430000	295680000	0	0	0	132990000	79030000	127940000	0	0	0	15	EVATLDALQSK;LVNYQHLMPTR;YTLDVDLK
AT1G23190	AT1G23190.1	PHOSPHOGLUCOMUTASE 3 (PGM3)	PHOSPHOGLUCOMUTASE 3 (PGM3)	Encodes a cytosolic phosphoglucomutase (PGM). Two Arabidopsis PGM proteins (AT1G70730/PGM2 and AT1G23190/PGM3) have high sequence similarities and redundant functions. Mature plants possessing a single cPGM allele had a major reduction in cPGM activity. Whereas pgm2 and pgm3 single mutants are undistinguishable from the wild type, loss of both PGM2 and PGM3 severely impairs male and female gameto…		27.1964	27.0953	27.1181	26.0763	25.6179	26.7963	0.973115	1.28458	11	11	6	28	28	16.3	77.283	120810000	200180000	184740000	10626000	8498600	22375000	47200000	49844000	42623000	22684000	16760000	27707000	43	ATGAFILTASHNPGGPTEDFGIK;EDFGGGHPDPNLTYAK;ESQEALSPLVDLALK;EYPIAQDLPNVDISAVGVTSFEGPEGK;FDVEVFDPADDYVK;FFEVPTGWK;LSGTGSEGATIR;LVSVEDIVR;VSTVSTSPIDGQKPGTSGLR;YDYENVDAGK;YLFEDGSR
AT2G33730	AT2G33730.1	SMALL1 (SMA1)	SMALL1 (SMA1)	Homolog of the DEADbox pre-mRNA splicing factor Prp28 which regulates abundance of miRNA. It plays essential roles in miRNA biogenesis and interacts with the DCL1 complex and positively influences pri-miRNA processing. SMA1 binds the promoter region of genes encoding pri-miRNAs (MIRs) and is required for MIR transcription. It enhances the abundance of the DCL1 protein levels through promoting the…		26.4053	25.9701	26.9092	21.6691	20.9405	23.3531	4.44064	2.11266	7	7	7	13.4	13.4	13.4	70.885	69817000	91773000	159830000	0	0	0	41601000	32117000	39608000	0	0	0	17	DVIGIAETGSGK;ELAQQIEEETVK;FSFDWENTEDTSR;IFREDFNISYK;ITQGCEIVIATPGR;SGVATSFLTLHDTEVFYDLK;VTSIVGGQSIEEQGLK
AT1G23310	AT1G23310.2;AT1G23310.1;AT1G70580.4;AT1G70580.3;AT1G70580.2;AT1G70580.1	GLUTAMATE:GLYOXYLATE AMINOTRANSFERASE (GGT1)	GLUTAMATE:GLYOXYLATE AMINOTRANSFERASE (GGT1);ALANINE-2-OXOGLUTARATE AMINOTRANSFERASE 1 (AOAT1);GLUTAMATE:GLYOXYLATE AMINOTRANSFERASE 1 (GGAT1)	Identified by cloning the gene that corresponded to a purified protein having glyoxylate aminotransferase activity. Localized to the peroxisome and thought to be involved in photorespiration/ metabolic salvage pathway.		27.5937	28.1911	28.1532	28.2684	28.5115	28.1549	-0.332225	0.947919	8	8	8	26.5	26.5	26.5	107.01	159110000	427860000	378580000	48558000	63154000	57376000	70567000	116400000	92720000	156680000	155420000	127860000	59	ALDYDTLNENVK;AMVIINPGNPTGQCLSEANIR;HYLSLTSGGLGAYSDSR;KEVAEFIQR;LLEATGISTVPGSGFGQK;LVLLGDEVYQQNIYQDERPFISSK;VPDVFYCLK;VVEEIYK
AT1G23740	AT1G23740.1	ALKENAL/ONE OXIDOREDUCTASE (AOR)	ALKENAL/ONE OXIDOREDUCTASE (AOR)	AOR is an alkenal/one oxidoreductase that acts on compounds with unsaturated alpha,beta-carbonyls. The activity of this enzyme with a number of substrates, including acrolein and 3-buten-2-one, was demonstrated in vitro using a truncated form of the protein that lacked approximately 80 of the first amino acids. This protein appears to localize to the chloroplast where it likely helps to maintain …		24.2515	25.4305	24.0428	27.3856	27.3084	27.0051	-2.65807	2.00824	6	6	6	26.2	26.2	26.2	18.568	15689000	63136000	21918000	26333000	27431000	25859000	6753000	22096000	7302600	40186000	54482000	59047000	15	ATDSPLPTVPGYDVAGVVVK;AWVYSDYGGVDVLK;LESNIVVPEIKEDQVLIK;NIDFAQAAGLPLAIETADEGLVR;VVAAALNPVDAK;VVALTGAVTPPGFR
AT1G23820	AT1G23820.2;AT1G23820.1;AT1G70310.1	SPERMIDINE SYNTHASE 1 (SPDS1)	SPERMIDINE SYNTHASE 1 (SPDS1)	Spermidine synthase.		23.4915	24.1243	24.0427	27.7856	24.0557	27.7711	-2.65131	1.08854	2	2	2	10.7	10.7	10.7	25.565	9264800	25530000	21916000	34748000	2877900	43976000	14204000	23608000	21036000	175840000	34264000	151950000	8	NAAEGSYDAVIVDSSDPIGPAK;VLVIGGGDGGVLR
AT1G23860	AT1G23860.3;AT1G23860.4;AT1G23860.2;AT1G23860.1	RS-CONTAINING ZINC FINGER PROTEIN 21 (RSZ21)	(SRZ-21); (SRZ21);RS-CONTAINING ZINC FINGER PROTEIN 21 (At-RSZ21);RS-CONTAINING ZINC FINGER PROTEIN 21 (RSZ21);RS-CONTAINING ZINC FINGER PROTEIN 21 (RSZP21)	Encodes a 9G8-like serine-arginine rich (SR) protein that interacts in vivo with U1-70K, a U1 small nuclear ribonucleoprotein 70-kDa protein that is involved in nuclear precursor mRNA processing. Barta et al (2010) have proposed a nomenclature for Serine/Arginine-Rich Protein Splicing Factors (SR proteins): Plant Cell. 2010, 22:2926.		23.1437	19.5649	21.6041	25.5666	24.6955	25.5746	-3.84132	1.54872	2	2	2	19.5	19.5	19.5	4.2568	7280000	0	0	7463700	4484000	9593700	10100000	0	0	33691000	21558000	21265000	2	ELEDEFK;RPPGYAFLEFDDERDALDAISALDR
AT1G24020	AT1G24020.2;AT1G24020.1	MLP-LIKE PROTEIN 423 (MLP423)	MLP-LIKE PROTEIN 423 (MLP423)	MLP-like protein 423;(source:Araport11)		24.3987	24.6533	25.0102	25.9179	25.8113	25.9027	-1.1899	2.03034	3	3	3	24.5	24.5	24.5	12.915	17375000	36838000	42856000	9521000	9717800	12044000	20625000	23404000	25913000	32562000	24899000	26092000	15	EIDEYLLK;FWVALGDGINLFPK;TIQVLAGDGNAPGSIR
AT1G24360	AT1G24360.1	(KR)	(KR)	Dual mitochondrial and plastid localized b-ketoacyl- ACP reductase, a component of the fatty acid synthase complex.		23.642	23.8984	24.4569	24.4129	25.1603	24.7111	-0.762338	1.40327	2	2	2	12.9	12.9	12.9	45.743	10283000	21830000	29204000	3354600	6188700	5272800	11439000	19212000	17487000	20303000	29932000	21590000	7	IINISSVVGLIGNIGQANYAAAK;QIEEYGGQAITFGGDVSK
AT1G24510	AT1G24510.2;AT1G24510.3;AT1G24510.1	CHAPERONIN CONTAINING T-COMPLEX POLYPEPTIDE-1 SUBUNIT 5 (CCT5)	CHAPERONIN CONTAINING T-COMPLEX POLYPEPTIDE-1 SUBUNIT 5 (CCT5)	TCP-1/cpn60 chaperonin family protein;(source:Araport11)		22.6158	22.6671	22.5077	23.7603	22.2368	23.9381	-0.714884	0.801013	2	2	2	11.5	11.5	11.5	15.109	5049200	9298000	7562600	0	0	0	8529100	8989000	12030000	0	0	0	2	QIEDAHIAILTCPFEPPKPK;SIVYGGGAAEIACSLAVDAAADKYPGVEQYAIR
AT1G26630	AT1G26630.1;AT1G26630.2	FUMONISIN B1-RESISTANT12 (FBR12)	EUKARYOTIC ELONGATION FACTOR 5A-2 (ATELF5A-2);EUKARYOTIC ELONGATION FACTOR 5A-2 (ELF5A-2);FUMONISIN B1-RESISTANT12 (FBR12)	Eukaryotic translation initiation factor 5A-2. Involved in programmed cell death triggered as a response to pseudomonas syringae infection. Loss of function mutants are more resistant to infection. The mRNA is cell-to-cell mobile.		26.9885	27.0218	27.039	26.4473	26.0419	26.1167	0.814484	1.97183	7	7	7	53.5	53.5	53.5	143	104600000	190240000	174880000	13742000	11402000	13970000	54523000	69312000	71928000	59957000	40682000	45402000	33	KLEDIVPSSHNCDVPHVNR;LPTDDGLTAQMR;SDDEHHFEASESGASK;TYPQSAGNIR;VDYQLIDITEDGFVSLLTDSGGTK;VDYQLIDITEDGFVSLLTDSGGTKDDLK;VDYQLIDITEDGFVSLLTDSGGTKDDLKLPTDDGLTAQMR
AT1G26850	AT1G26850.1;AT1G26850.2;AT1G26850.3	0	0	S-adenosyl-L-methionine-dependent methyltransferases superfamily protein;(source:Araport11)		23.1329	23.5157	23.9219	28.9358	29.3697	28.9846	-5.57324	4.18441	7	7	7	15.6	15.6	15.6	21.311	7225500	16744000	20155000	77121000	114490000	101980000	2125600	4945100	5862000	144930000	181290000	51135000	20	AIQNWIQYEGDVFR;DSHEAQVQFALER;ILRPEGAVIIRDDVDTLIK;ISSGSISGVTVDAYEDDNR;LGVVYER;LVDHEDGPLVPEK;TDDTDDVWYKK
AT2G41475	AT2G41475.1	EMBRYO-SPECIFIC PROTEIN 3A (ATS3A)	EMBRYO-SPECIFIC PROTEIN 3A (ATS3A)	Embryo-specific protein 3, (ATS3);(source:Araport11)		26.6792	26.1908	27.0508	22.3492	19.1509	25.2144	4.40209	1.20153	2	2	2	16.8	16.8	16.8	7.0349	84415000	106940000	176310000	802420	0	7474400	55887000	48642000	101070000	7626700	0	30615000	8	DKISISFGDVYGNEVYVK;QGSDGWKPENVK
AT1G27090	AT1G27090.1	0	0	glycine-rich protein;(source:Araport11)		24.4831	23.2714	23.7445	24.3052	23.6345	22.634	0.30848	0.49707	2	2	2	5.5	5.5	5.5	5.987	18422000	14136000	17824000	0	2149200	0	26903000	11964000	16297000	0	10956000	0	5	ITQMEESISQGK;TLNKEQEEVLR
AT2G46240	AT2G46240.1	BCL-2-ASSOCIATED ATHANOGENE 6 (BAG6)	BCL-2-ASSOCIATED ATHANOGENE 6 (BAG6);ARABIDOPSIS THALIANA BCL-2-ASSOCIATED ATHANOGENE 6 (ATBAG6)	A member of Arabidopsis BAG (Bcl-2-associated athanogene) proteins, plant homologs of mammalian regulators of apoptosis. Expression of BAG6 in leaves was strongly induced by heat stress. Knockout mutants exhibited enhanced susceptibility to fungal pathogen Botrytis cinerea. Plant BAG proteins are multi-functional and remarkably similar to their animal counterparts, as they regulate apoptotic-like…		29.0893	28.7884	29.2444	24.9018	23.9749	25.1591	4.36206	2.82171	22	22	22	29.4	29.4	29.4	260.13	448660000	647270000	806560000	4707900	2721200	7193300	85241000	73548000	103300000	2061900	1271900	1810800	91	DRGVVIEEHEPEIEKGEAVLPVR;EAVKEQVEIK;EGNFECNVLSDAEEK;EQPLETEVILNEQAPEPEITEPGISK;GIGQQTSEPQDEKEQSPETEVIVK;GKEGNFECNVLSDAEEK;GVVIEEHEPEIEK;GVVIEEHEPEIEKGEAVLPVR;HNQPPAEVR;IEALEASTDQHIEEK;LSENHLPKPTEPTKR;NKEELGQLTYPTSWVPSR;NKEEPGQVPYPIFWIPSYGK;NLESCPSDLHR;NVELSELPVGVIDEETQPLSQDPSSSYTR;QATENAAAASSTTIPEK;RIEALEASTDQHIEEK;SLIQGQDVK;SQPSDSPVNLEHSQLTEENK;SSVINIPVANHLQEPR;TASQEETEVDHSPNNSK;TVEAPFDISK
AT1G27650	AT1G27650.1;AT1G27650.2	(ATU2AF35A)	(ATC3H8); (ATU2AF35A)	U2 auxiliary factor small subunit. The atU2AF35a protein and its homolog, atU2AF35b, contain most of the conserved domains of hsU2AF35, including the psiRRM, one RS domain, two zinc fingers, and the two regions for interacting with U2AF large subunit. Both proteins lack the stretch of glycines present in human U2AF35. The sequences are overall 83% identical, and each Arabidopsis homolog shows app…		22.7318	22.6197	22.2754	21.3438	22.9643	23.8341	-0.171714	0.378123	2	1	1	11.1	6.4	6.4	2.362	5471900	8997900	6438200	0	0	0	8309800	8276000	7132200	0	0	0	1	AEHLASIFGTEKDR;KIQEHFEDFFEDLFEELGK
AT4G17390	AT4G17390.1;AT4G16720.1	RIBOSOMAL PROTEIN EL15Y (EL15Y)	RIBOSOMAL PROTEIN EL15Y (EL15Y)	Ribosomal protein L23/L15e family protein;(source:Araport11)		28.3228	27.4816	28.1619	23.827	23.1463	24.0601	4.31096	3.77164	4	4	4	21.1	21.1	21.1	46.78	263750000	261640000	380850000	2234900	1532200	3358100	217790000	133500000	185570000	5177500	3345400	5302900	37	QQPSIVR;VVNSYWLNEDSTYK;YVSELWR;YYEIILVDPAHNAVR
AT1G29150	AT1G29150.2;AT1G29150.1	NON-ATPASE SUBUNIT 9 (ATS9)	NON-ATPASE SUBUNIT 9 (ATS9);REGULATORY PARTICLE NON-ATPASE 6 (RPN6)	specifically interacts with FUS6/COP11 via the C-terminal domain of FUS6/COP11 and associates with an ATPase subunit of the 19S proteasome regulatory complex, AtS6A. The mRNA is cell-to-cell mobile.		22.1881	22.0695	22.5998	23.6504	23.8132	23.1277	-1.24464	2.2862	2	2	2	5.5	5.5	5.5	4.4767	3753800	6144800	8061300	0	2432700	0	7585800	7537800	8796000	0	9800900	0	3	AQLEDDPIVHR;LLLVDIDLLESK
AT1G66580	AT1G66580.1	SENESCENCE ASSOCIATED GENE 24 (SAG24)	SENESCENCE ASSOCIATED GENE 24 (SAG24);RIBOSOMAL PROTEIN UL16X (UL16X);RIBOSOMAL PROTEIN L10 C (RPL10C)	senescence associated gene 24;(source:Araport11)		28.3185	27.4948	27.786	24.8723	21.9531	24.0238	4.25001	1.8013	10	4	3	36.7	15.4	11.3	40.486	262970000	264050000	293490000	0	0	3274700	195330000	103260000	94983000	0	0	11607000	23	CKDNHGVHAQEALR;DNHGVHAQEALR;ENVSSEALEAAR;FLSNHGPLANR;GVDEFPFCVHLVSWEK;IVPDGVNAK;IYDVGMK;KGVDEFPFCVHLVSWEK;KGVDEFPFCVHLVSWEKENVSSEALEAAR;VAIGQVLLSVR
AT1G29880	AT1G29880.1	0	CELLULOSE SYNTHASE LIKE C12 (CLSC12)	glycyl-tRNA synthetase / glycine-tRNA ligase;(source:Araport11)		25.2706	22.3016	21.3638	23.7163	22.5361	21.9454	0.246086	0.365709	2	2	2	4.3	4.3	4.3	4.6744	0	7217200	0	0	0	0	0	6752900	0	0	0	0	4	EFTLAEIEHFVDPENK;VFTPSVIEPSFGIGR
AT1G29930	AT1G29930.1;AT1G29920.1;AT1G29910.1	CHLOROPHYLL A/B BINDING PROTEIN 1 (CAB1)	CHLOROPHYLL A/B BINDING PROTEIN 1 (CAB1); (AB140);CHLOROPHYLL A/B PROTEIN 140 (CAB140);LIGHT-HARVESTING CHLOROPHYLL A/B-PROTEIN 1.3 (LHCB1.3);CELLULOSE SYNTHASE LIKE C8 (CLSC8)	Subunit of light-harvesting complex II (LHCII),which absorbs light and transfers energy to the photosynthetic reaction center. The mRNA is cell-to-cell mobile.		30.8518	30.0266	29.2558	31.718	31.3071	31.3822	-1.42436	1.38964	8	2	2	61	27.3	27.3	323.31	1522299999.9999998	1526999999.9999998	812920000	530510000	438510000	537340000	879350000	817370000	497680000	2110199999.9999998	1906799999.9999998	1519099999.9999998	88	AGSQIFSDGGLDYLGNPSLVHAQSILAIWATQVILMGAVEGYR;ELEVIHSR;FGEAVWFK;GPSGSPWYGSDR;NRELEVIHSR;VAGNGPLGEAEDLLYPGGSFDPLGLATDPEAFAELK;WAMLGALGCVFPELLAR;YLGPFSGESPSYLTGEFPGDYGWDTAGLSADPETFAR
AT3G20820	AT3G20820.1	0	0	Leucine-rich repeat (LRR) family protein;(source:Araport11)		29.7528	29.2226	29.7766	26.7138	22.864	26.4376	4.24557	1.43894	14	14	14	46.8	46.8	46.8	323.31	710640000	874590000	1166400000	16530000	1259900	17449000	267850000	135130000	302960000	30219000	4187400	15877000	119	GESEDPIFER;IPEGFGPR;IPESLTNIYR;IPVGSPFDHLEAASFMFNDCLCGK;IPVGSPFDHLEAASFMFNDCLCGKPLR;LADVDLSGNQLYGTIPPSLGR;LAVLNVADNR;LSAITIADWK;NNLISGVIPSDVGR;SISGASFIGHLDLSHNHLCGR;SYFTVLDLSYNNLK;TLDLIGNQISGGIPYDIGR;VADINLR;VADINLRGESEDPIFER
AT4G13170	AT4G13170.1	RIBOSOMAL PROTEIN UL13X (UL13X)	(RPL13AC);RIBOSOMAL PROTEIN UL13X (UL13X)	Ribosome protein; affects root system architecture through shoot potassium accumulation.		28.3722	27.8639	28.2629	25.2187	25.8532	20.7478	4.22646	1.22955	9	3	3	43.7	14.6	14.6	53.914	272940000	341040000	408480000	5864400	10004000	338050	341640000	247020000	176970000	28931000	33380000	21683000	27	CEEICLSGGLVR;ELLNGQEVVVVR;LGSQLDVLAPVK;LGSQLDVLAPVKY;LSSEVGWNHYDTIK;MNTKPSHGPIHFR;MVIPDALK;RVVVDGR;VFEGIPPPYDK
AT4G40030	AT4G40030.2;AT5G10980.1;AT4G40030.3;AT4G40030.4;AT4G40040.1;AT4G40040.2;AT4G40040.3;AT4G40030.1;AT1G75600.1;AT5G10390.1;AT5G10400.1;AT5G65360.1;AT1G13370.1;AT1G09200.1;AT1G19890.1;AT3G27360.1	HISTONE 3.3 (H3.3)	(HTR4);HISTONE 3.3 (H3.3)	Histone variant H3. Associated with gene body methylation.		29.2043	28.6404	29.2286	26.6931	25.0824	22.6323	4.22181	1.47803	4	4	4	33.5	33.5	33.5	19.921	485900000	584180000	797760000	16295000	0	1248200	518260000	279150000	415350000	64916000	0	27549000	31	EIAQDFK;FQSHAVLALQEAAEAYLVGLFEDTNLCAIHAK;STELLIR;YRPGTVALR
AT1G30580	AT1G30580.1	(ENGD-1)	(ENGD-1)	GTP binding protein;(source:Araport11)		26.8954	26.7473	26.9159	26.1108	25.967	25.6661	0.938284	2.28997	6	6	6	25.4	25.4	25.4	57.635	98061000	157280000	160580000	10883000	10825000	10222000	42572000	34879000	37204000	39697000	38454000	28848000	37	AFEDADIIHVDDIVDPVRDLETITEELR;APQAAGAIHTDFER;FEDLKELGNEPAVK;IGIVGLPNVGK;TGFSAINLIYFFTAGPDEVK;TYVVQDGDIIFFK
AT1G30630	AT1G30630.1	EPSILON1 COAT PROTEIN (epsilon1-COP)	EPSILON1 COAT PROTEIN (epsilon1-COP)	Member of the Coat Protein I (COPI) complex is a seven-subunit coatomer complex consisting of the &#945;, &#946;, &#946;&#8242;, &#947;, &#948;, &#949;, and &#950; proteins. COPI is required for retrograde transport from the Golgi to the endoplasmic reticulum, Golgi maintenance, and cell plate formation.		25.8086	26.3135	25.8589	27.3664	27.9977	28.4824	-1.95521	2.18419	6	6	6	34.2	34.2	34.2	66.995	46169000	116430000	77175000	25986000	44233000	0	32694000	39141000	30422000	63397000	175770000	0	24	ASMAGPDHLFNLR;EWLADPTVGNNAIIR;IQEAYLIFQDFSEK;LIAGTIFMHEEDYNEALK;LLAMYLSSPENK;NHFYLGAYQAAINNSEIPNLSQEDIVER
AT1G31330	AT1G31330.1	PHOTOSYSTEM I SUBUNIT F (PSAF)	PHOTOSYSTEM I SUBUNIT F (PSAF)	Encodes subunit F of photosystem I.		28.3737	28.7614	28.2137	26.9913	27.6188	28.4557	0.760971	0.984489	7	7	7	37.6	37.6	37.6	30.238	273220000	635260000	394780000	20037000	34015000	70680000	172720000	202040000	198870000	68031000	67060000	86600000	55	EFLNGDLIAK;EIIIDVPLASR;KLESSLK;LYAPESAPALALNAQIEK;RFDNYGK;SYLIAISGEK;YGLLCGSDGLPHLIVNGDQR
AT2G35635	AT2G35635.1;AT1G31340.1;AT3G52590.1;AT4G05320.5;AT4G05320.4;AT4G05320.2;AT5G20620.1;AT4G05320.6;AT4G05320.3;AT4G05320.1;AT5G37640.1;AT1G65350.1;AT5G20620.2;AT5G03240.3;AT5G03240.2;AT5G03240.1;AT4G02890.3;AT2G36170.1;AT4G02890.4;AT4G05320.8;AT1G55060.1;AT4G02890.2;AT4G05050.3;AT4G05050.2;AT4G05050.1;AT4G02890.1;AT1G23410.1;AT4G05320.7;AT4G05050.4;AT3G09790.1;AT3G09790.2	UBIQUITIN 7 (UBQ7)	RELATED TO UBIQUITIN 2 (RUB2);UBIQUITIN 7 (UBQ7)	encodes a ubiquitin-like protein that contains tandem repeats of the ubiquitin coding region, but at least one repeat per gene encodes a protein with amino acid substitutions. The mRNA is cell-to-cell mobile.		24.0416	24.6176	24.5218	25.237	25.3855	25.6932	-1.04489	2.25045	5	1	1	39.6	9.1	9.1	23.965	13565000	35939000	30548000	5939100	7234100	10416000	20643000	31523000	27812000	35538000	36118000	42689000	7	EIEIDIEPTDTIDR;ESTLHLVLR;IQDKEGIPPDQQR;TITLEVESSDTIDNVK;TLADYNIQK
AT1G31812	AT1G31812.1	ACYL-COA-BINDING PROTEIN 6 (ACBP6)	ACYL-COA-BINDING PROTEIN 6 (ACBP6); (ATACBP6);ACYL-COA-BINDING PROTEIN (ACBP)	Acyl-CoA-binding protein. Bind acyl-CoA esters and protect acyl-CoAs from degradation by microsomal acyl-hydrolases. Plays a role in determining seed oil content.		21.4169	22.805	17.786	27.78	27.7192	28.3448	-7.27868	1.72447	2	2	2	26.1	26.1	26.1	24.286	0	10231000	0	34613000	36467000	65450000	0	19683000	0	145680000	127930000	175600000	10	GLKEEFEEHAEK;SSEEAMNDYITK
AT1G32060	AT1G32060.1	PHOSPHORIBULOKINASE (PRK)	PHOSPHORIBULOKINASE (PRK)	Phosphoribulokinase is an essential enzyme of the Calvin-Benson-Bassham (CBB) cycle (photosynthetic carbon fixation). It catalyzes the ATP-dependent conversion of ribulose-5-phosphate (Ru5P) to ribulose-1,5-bisphosphate.		26.4256	27.6818	26.7453	28.9852	29.2876	29.0732	-2.16446	1.92215	11	11	11	44.1	44.1	44.1	209.07	70806000	300580000	142670000	79809000	108150000	108440000	26510000	52443000	40335000	113100000	117610000	91140000	69	ANDFDLMYEQVK;GGNPDSNTLISDTTTVICLDDYHSLDR;GHSLESIK;HADFPGSNNGTGLFQTIVGLK;KLTCSYPGIK;KPDFDAFIDPQK;LTSVFGGAAKPPK;NGIAVEKPIYNHVTGLLDPPELIQPPK;QYADAVIEVLPTTLIPDDNEGK;RLTSVFGGAAKPPK;YFSPVYLFDEGSTISWIPCGR
AT1G32470	AT1G32470.1;AT2G35370.1	(GDC-H1)	(GDC-H1)	Single hybrid motif superfamily protein;(source:Araport11)		24.7823	26.2257	25.2652	27.645	28.0825	27.7786	-2.41095	1.96001	4	4	4	48.2	48.2	48.2	47.937	22667000	109560000	51141000	31520000	46910000	44205000	9515000	31504000	20315000	101820000	105690000	78446000	23	FCEEEDAAH;HEGSVATIGITDHAQDHLGEVVFVELPEANSSVSK;LTESPGLINSSPYEDGWMIK;VKPSSPAELEALMGPK
AT3G44310	AT3G44310.3;AT3G44310.1	NITRILASE 1 (NIT1)	NITRILASE 1 (NIT1);A. THALIANA NITRILASE 1 (ATNIT1); (NITI)	Mutants are resistant to indole-3-acetonitrile (IAN). NIT1 catalyzes the terminal activation step in indole-acetic acid biosynthesis. Predominantly expressed isoform of nitrilase isoenzyme family. Aggregation of NIT1 in cells directly abutting wound sites is one of the earliest events associated with wound and herbicide-induced cell death. The protein undergoes thiolation following treatment with…		27.7726	27.8853	27.7136	25.88	23.267	21.5738	4.21687	1.41005	7	7	5	24.3	24.3	18.5	92.581	180120000	346120000	279130000	9274300	0	0	76097000	84194000	74219000	16787000	0	0	40	CIWGQGDGSTIPVYDTPIGK;FGLAVGVHNEEGRDEFR;FGLAVGVHNEEGRDEFRK;GAELVLFPEGFIGGYPR;GIELYCAPTADGSK;KYHASAIHVPGPEVAR;YHASAIHVPGPEVAR
AT3G05590	AT3G05590.1;AT3G05590.3;AT3G05590.2	RIBOSOMAL PROTEIN L18 (RPL18)	RIBOSOMAL PROTEIN L18 (RPL18);RIBOSOMAL PROTEIN EL18Y (EL18Y)	Encodes cytoplasmic ribosomal protein L18.		27.0003	26.496	27.2511	22.7321	22.7895	22.6315	4.19811	3.00577	10	3	3	48.7	15.5	15.5	38.22	105460000	132130000	202580000	0	1196500	0	59486000	58643000	67592000	0	10218000	0	23	AGGECLTFDQLALR;APLGQNTVLLR;GIDLIAGGK;HFGPAPGVPHSHSK;HFGPAPGVPHSHSKPYVR;IAVLVGTITDDLR;LVEFMTGK;LVEFMTGKEDK;SDDVYLK;VHEIPAMK
AT2G20060	AT2G20060.1	RIBOSOMAL PROTEIN UL4M (UL4M)	RIBOSOMAL PROTEIN UL4M (UL4M)	Ribosomal protein L4/L1 family;(source:Araport11)		28.7237	27.9695	28.1071	26.1919	24.2654	21.8003	4.18088	1.41555	2	2	2	7.3	7.3	7.3	3.6809	348230000	366920000	0	0	0	0	361800000	185060000	0	0	0	0	3	AASISRRIFR;VLVVEGGPIDEK
AT1G35160	AT1G35160.1;AT1G35160.2	GF14 PROTEIN PHI CHAIN (GF14 PHI)	GF14 PROTEIN PHI CHAIN (GF14 PHI)	GF14 protein phi chain member of 14-3-3 protein family. This protein is reported to interact with the BZR1 transcription factor involved in brassinosteroid signaling and may affect the nucleocytoplasmic shuttling of BZR1 The mRNA is cell-to-cell mobile.		23.524	24.4124	23.3541	26.6396	26.6166	26.9169	-2.96088	2.4045	5	3	3	27	15.4	15.4	24.039	9475800	31173000	13598000	15702000	16982000	24326000	16224000	19531000	14839000	47140000	42445000	36898000	9	AAQDIANAELAPTHPIR;IISSIEQKEESR;QAFDEAIAELDTLGEESYK;SKIESELSK;VAEAVDKDELTVEER
AT1G35620	AT1G35620.1	PDI-LIKE 5-2 (PDIL5-2)	PDI-LIKE 5-2 (ATPDIL5-2);ARABIDOPSIS THALIANA PROTEIN DISULFIDE ISOMERASE 8 (ATPDI8);PROTEIN DISULFIDE ISOMERASE 8 (PDI8);PDI-LIKE 5-2 (PDIL5-2)	Encodes a protein disulfide isomerase-like (PDIL) protein, a member of a multigene family within the thioredoxin (TRX) superfamily. Unlike several other PDI family members, transcript levels for this gene are not up-regulated in response to three different chemical inducers of ER stress (dithiothreitol, beta-mercaptoethanol, and tunicamycin). However, the level of transcripts for this gene is sli…		24.037	19.5629	21.4604	27.2799	27.4358	27.2101	-5.62181	1.61133	2	2	2	3.9	3.9	3.9	11.513	0	0	0	24474000	29963000	29807000	0	0	0	95222000	99278000	87226000	4	IVLTIVEDETHESLEK;KIVLTIVEDETHESLEK
AT1G35680	AT1G35680.1	CHLOROPLAST RIBOSOMAL PROTEIN L21 (RPL21C)	ATPASE-IN-SEED-DEVELOPMENT (ASD);CHLOROPLAST RIBOSOMAL PROTEIN L21 (RPL21C);RIBOSOMAL PROTEIN BL21C (BL21C)	Encodes a chloroplast ribosomal protein L21 that is required for chloroplast development and embryogenesis. The mRNA is cell-to-cell mobile.		29.1801	27.6385	28.0557	26.5311	28.376	27.9982	0.656345	0.678252	4	4	4	34.1	34.1	34.1	105	477830000	291710000	353820000	14564000	57494000	51472000	252890000	107680000	130370000	51043000	110460000	78631000	34	FAESVVEAEPETTDIEAVVVSDVSEVTEEK;ITGITGYEEYPASPNVAVGEVNL;LKDANVDDQIVLNK;QYIVFPGR
AT1G35720	AT1G35720.1	ANNEXIN 1 (ANNAT1)	ANNEXIN 1 (ANNAT1); (OXY5); (ATOXY5);ANNEXIN 1 (ANN1); (ATANN1)	Encodes a member of the annexin gene family, a diverse, multigene family of calcium-dependent, membrane-binding proteins. The protein was determined to have peroxidase activity. This activity is thought to be dependent on the presence of post-translational modifications (most likely phosphorylation). The protein was shown to be present as a mixture of monomer and homodimer. The homodimerization s…		26.7916	27.0975	27.1143	27.6036	28.2262	28.5396	-1.122	1.68322	9	9	9	33.8	33.8	33.8	101.19	91257000	200490000	184250000	30630000	51824000	74913000	32834000	43117000	31237000	68025000	61383000	74639000	37	AILLWTLEPGER;HYNDEDVIR;QAYHETYGEDLLK;SLEEGDDDDKFLALLR;TGTDEGALTR;TLDKELSNDFER;VIGEEYQR;VSDSVPAPSDDAEQLR;YQDDHGEEILK
AT2G33340	AT2G33340.1;AT2G33340.2;AT2G33340.3	MOS4-ASSOCIATED COMPLEX 3B (MAC3B)	MOS4-ASSOCIATED COMPLEX 3B (MAC3B);PLANT U-BOX 60 (PUB60)	Encodes MAC3B, a U-box proteins with homology to the yeast and human E3 ubiquitin ligase Prp19. Associated with the MOS4-Associated Complex (MAC). Involved in plant innate immunity. Regulator of flowering time.		27.3099	27.2361	26.9815	22.4762	23.0176	23.5656	4.15598	2.82117	9	9	8	27	27	25	44.632	130700000	220700000	168040000	876290	1401500	2383600	33098000	85684000	53003000	3170000	3931600	4799600	25	AAVDEELGPDAK;CPVTGEPLTIDDIVPIK;FTQLSSHPLHK;IFGLPGDEK;KLCPGISAEIITELTDCNAALSQK;NPGDGNYACGYTLNDHSAEVR;NVDYTAAAFHPDGLILGTGTSQSVVK;QIPQTLASIDTLER;QLLAEVER
AT1G42970	AT1G42970.1	GLYCERALDEHYDE-3-PHOSPHATE DEHYDROGENASE B SUBUNIT (GAPB)	GLYCERALDEHYDE-3-PHOSPHATE DEHYDROGENASE B SUBUNIT (GAPB)	Encodes chloroplast localized glyceraldehyde-3-phosphate dehydrogenase that can use both NADH and NADPH to reduce 1,3-diphosphate glycerate. It forms A2B2 heterotetramers with GapA forms of the GADPH enzyme. These complexes are active in the light under reducing conditions, but show reduced NADPH-dependent activity in response to oxidized thioredoxins and increased NAD(H)/NADP(H) ratios due to th…		31.1218	31.2849	30.8126	31.6708	31.7946	31.9631	-0.736404	2.09261	25	25	22	53.9	53.9	45.4	323.31	1835599999.9999998	3652699999.9999995	2391600000	513430000	614770000	803770000	404620000	530440000	375240000	634460000	721120000	632370000	324	AAALNIVPTSTGAAK;AVSLVLPQLK;DPLKLPWAELGIDIVIEGTGVFVDGPGAGK;DSPLEVVVLNDSGGVK;GILDVCDAPLVSVDFR;GKLNGIALR;GLTAEDVNEAFR;GLTAEDVNEAFRK;GTMTTTHSYTGDQR;IVDNETISVDGK;KDSPLEVVVLNDSGGVK;KGLTAEDVNEAFR;KGLTAEDVNEAFRK;LPWAELGIDIVIEGTGVFVDGPGAGK;TNPADEECKVYD;VIITAPAK;VLDEEFGIVK;VPTPNVSVVDLVINVEK;VPTPNVSVVDLVINVEKK;VVAWYDNEWGYSQR;VVDLAHLVASK;VVSNRDPLK;VVSNRDPLKLPWAELGIDIVIEGTGVFVDGPGAGK;WPGAEAVGSGDPLEDFCK;YDSMLG…
AT1G20960	AT1G20960.1;AT1G20960.2	EMBRYO DEFECTIVE 1507 (emb1507)	EMBRYO DEFECTIVE 1507 (emb1507); (BRR2); (BRR2A)	Similar to DEAD/DExH box ATP-dependent RNA helicase . Required for proper splicing of FLC. Mutants have reduced FLC levels and are early flowering.		27.3897	27.3114	27.3579	22.4019	24.6834	22.5708	4.1343	1.82391	13	13	13	8.5	8.5	8.5	98.314	138130000	232530000	218140000	0	0	1196100	26407000	27405000	27041000	0	0	4976900	40	DVLHSHEDIVK;EIEETQIIVTTPEK;ELSGDQSLTGR;FPNIDLTYEIVGSEEVNPGK;GQIIISTPEK;HLILPEK;HLSDHLSELVENTLSDLEASK;LVGLSATLPNYEDVALFLR;TICAEFAILR;TVLNVELTVTPDFLWDEK;VVELTGETALDLK;YVEPFWIIVEDNDGEK;YYDLSAQELGELIR
AT1G43670	AT1G43670.1	FRUCTOSE-1,6-BISPHOSPHATASE (FBP)	FRUCTOSE INSENSITIVE 1 (FINS1);ARABIDOPSIS THALIANA CYTOSOLIC FRUCTOSE-1,6-BISPHOSPHATASE (AtcFBP);FRUCTOSE-1,6-BISPHOSPHATASE (FBP); (CYFBP)	Encodes a fructose-1,6-bisphosphatase. This enzyme, in addition to catalyzing the formation of fructose-6-phosphate for sucrose biosynthesis, appears to play a role in fructose-mediated signaling that is independent of its enzymatic activity. atcfbp-1/fins1 mutants have reduced photosynthetic rates, elevated levels of starch and reduced levels of sucrose during the day. Although the protein is ex…		26.4886	25.9166	25.1346	26.8802	27.0208	26.4973	-0.95286	1.21402	4	4	4	20.8	20.8	20.8	86.075	73967000	88430000	46714000	18551000	22474000	18187000	39036000	39010000	36009000	44425000	42329000	29944000	20	GNIYSVNEGNAQNWDGPTTK;LIGLAGETNIQGEEQK;SPIFLGSYDDVEEIK;TSVLVSEEDEEATFVEPSKR
AT1G44575	AT1G44575.1;AT1G44575.3;AT1G44575.2	NONPHOTOCHEMICAL QUENCHING 4 (NPQ4)	NONPHOTOCHEMICAL QUENCHING 4 (NPQ4);PHOTOSYSTEM II SUBUNIT S (PSBS); (CP22)	Encoding PSII-S (CP22), a ubiquitous pigment-binding protein associated with photosystem II (PSII) of higher plants. Involved in nonphotochemical quenching rather than in photosynthesis. Mutant has a normal violaxanthin cycle but has a limited capacity of quenching singlet excited chlorophylls and is tolerant to lipid peroxidation.		27.5443	27.7494	27.5859	28.8695	28.7855	29.1243	-1.29991	3.28433	6	6	6	27.5	27.5	27.5	27.04	153760000	315000000	255490000	73655000	76365000	112350000	96330000	118650000	94668000	180660000	223970000	198440000	39	ANELFVGR;EQGPLFGFTK;FVDDPPTGLEK;LAQLGIAFSLIGEIITGK;SKVEDGIFGTSGGIGFTK;VEDGIFGTSGGIGFTK
AT5G43010	AT5G43010.1;AT1G45000.1;AT1G45000.2	REGULATORY PARTICLE TRIPLE-A ATPASE 4A (RPT4A)	REGULATORY PARTICLE TRIPLE-A ATPASE 4A (RPT4A)	26S proteasome AAA-ATPase subunit RPT4a (RPT4a) mRNA,		24.1835	23.8974	24.7768	22.5776	24.2235	24.3572	0.566471	0.659372	4	3	3	11	8	8	7.9333	14967000	21815000	36455000	940080	3233000	4125800	15652000	17162000	12390000	13306000	9333600	17152000	3	AIASNIDANFLK;GVLLYGPPGTGK;HGEIDYEAIVK;VVSSAIIDK
AT4G24780	AT4G24780.2;AT4G24780.1	(PLL19)	(PLL19)	Encodes a pectate lyase involved in response to nematodes.		25.7887	25.4492	26.1509	23.0729	20.5517	21.4311	4.11106	1.91735	4	4	4	11	11	11	34.062	45536000	63959000	94494000	1325100	253680	542840	27986000	23268000	56735000	12019000	7680200	10927000	16	CDPHWEQHR;HAVVQDEPLWIIFQR;IYVVTDSGNDNPVSPK;IYVVTDSGNDNPVSPKPGTLR
AT1G47128	AT1G47128.1	RESPONSIVE TO DEHYDRATION 21A (RD21A)	RESPONSIVE TO DEHYDRATION 21A (RD21A);RESPONSIVE TO DEHYDRATION 21 (RD21)	Cysteine proteinase precursor-like protein/ dehydration stress-responsive gene (RD21). Has been shown to have peptide ligase activity and protease activity in vitro. RD21 is involved in immunity to the necrotrophic fungal pathogen Botrytis cinerea.Activity detected in root, leaf, flower and cell culture.		25.8227	26.1787	26.2384	26.613	25.8738	27.681	-0.642659	0.763314	6	6	6	22.1	22.1	22.1	59.06	46621000	106050000	100400000	15415000	10148000	41313000	27957000	21273000	25438000	33072000	30682000	54879000	26	AFQLYDSGIFDGSCGTQLDHGVVAVGYGTENGK;AVAHQPISIAIEAGGR;CGIAIEPSYPIK;NGGIDTDKDYPYK;SWGESGYLR;VVTIDSYEDVPTYSEESLK
AT1G47250	AT1G47250.1;AT5G42790.1	20S PROTEASOME ALPHA SUBUNIT F2 (PAF2)	20S PROTEASOME ALPHA SUBUNIT F2 (PAF2)	Encodes 20S proteasome subunit PAF2 (PAF2).		22.6784	23.2351	23.3895	23.1939	26.039	24.4776	-1.46918	0.976973	2	2	2	11.9	11.9	11.9	12.095	5272900	13784000	13936000	1441100	0	4485000	11608000	15725000	16239000	12553000	0	27039000	6	NQYDTDVTTWSPTGR;SESINHSFTYESPLPVGR
AT1G47830	AT1G47830.1	ADAPTOR 55 PROTEIN 2 SMALL SUBUNIT (AP2S)	ADAPTOR 55 PROTEIN 2 SMALL SUBUNIT (AP2S)	Part of adaptor protein (AP) complex which mediadates clathrin-dependent trafficking at the trans-Golgi network (TGN) and the plasma membrane, respectively. Mediates endocytosis.		23.7087	22.9344	24.4207	21.7932	22.2577	24.5259	0.829003	0.651291	2	2	2	12.7	12.7	12.7	3.4818	10770000	11191000	28480000	0	0	0	15578000	9763700	24780000	0	0	0	5	FTNFVEFR;YYVPLEESEK
AT1G48030	AT1G48030.5;AT1G48030.4;AT1G48030.3;AT1G48030.2;AT1G48030.1	MITOCHONDRIAL LIPOAMIDE DEHYDROGENASE 1 (mtLPD1)	MITOCHONDRIAL LIPOAMIDE DEHYDROGENASE 1 (mtLPD1)	Encodes a mitochondrial lipoamide dehydrogenase whose expression is induced by light.		24.2628	24.4735	24.1232	26.458	25.8048	26.4214	-1.94159	2.66377	3	3	3	8.1	8.1	8.1	10.427	15813000	32522000	23174000	13845000	9674400	17255000	13577000	21746000	12401000	29379000	46549000	27945000	7	AIDNAEGLVK;FISPNEVSVETIDGGNTIVK;TPFTSGLDLEK
AT1G48350	AT1G48350.1	EMBRYO DEFECTIVE 3105 (EMB3105)	EMBRYO DEFECTIVE 3105 (EMB3105); (UL18C)	Member of the uL18 RNA-binding protein family. uL18 proteins share a short structurally conserved domain that binds the 5S rRNA and allow its incorporation into ribosomes.		25.407	25.027	24.6141	25.5665	25.6105	25.2937	-0.474177	1.08937	2	2	2	18.2	18.2	18.2	4.5095	0	47731000	32566000	7462800	8455100	7896500	0	29841000	28319000	48052000	37877000	30241000	4	HLYVQVIDDTK;QKPISEEFDYTSGPTIEVAK
AT4G18100	AT4G18100.1	RIBOSOMAL PROTEIN EL32Z (EL32Z)	RIBOSOMAL PROTEIN EL32Z (EL32Z)	Ribosomal protein L32e;(source:Araport11)		30.5856	30.424	31.0041	26.2191	28.0132	25.4583	4.10769	1.86382	4	4	2	29.3	29.3	18	89.518	1265800000	2011199999.9999998	2731100000	0	44709000	8850800	343390000	314180000	487210000	0	74797000	16967000	84	ASQLDVVVTNR;GVTLMPNVGYGSDK;GVTLMPNVGYGSDKK;TYCAEIAHNVSTK
AT3G06810	AT3G06810.1	IBA-RESPONSE 3 (IBR3)	IBA-RESPONSE 3 (IBR3)	Encodes a protein with similarity to acyl-CoA dehydrogenases. Mutations in IBR3 render plants resistant to indole-3-butryic acid, a putative storage form of the biologically active auxin IAA (indole-3-acetic acid). IBR3 is hypothesized to carry out the second step in a &#946;-oxidation-like process of IBA metabolism in Arabidopsis. Though its subcellular location has not been determined, IBR3 has…		27.9998	27.4475	27.72	22.9293	23.5269	24.3918	4.10642	2.58099	10	10	10	20.8	20.8	20.8	115.81	210840000	255530000	280370000	1199600	1994800	4226000	71166000	56862000	56920000	2034700	2751100	4239200	33	ALASLHSADVDAIGLEK;ALGEHTQVPVPK;DVSPSYESLVDGSGR;FAADNVSGFPTNPSQFK;FIAQHGSFVSDLAK;LLVLEAADHLDK;NTGVQANELVESALGYIAR;QYLASTSEGKPER;RPLTVFGFDDAPHGHAEISFENVVVPAK;VSQFGHGQSNPTFLIEVGSGSSLK
AT1G48920	AT1G48920.1	NUCLEOLIN LIKE 1 (NUC-L1)	NUCLEOLIN LIKE 1 (ATNUC-L1);PARALLEL 1 (PARL1);NUCLEOLIN LIKE 1 (NUC-L1);NUCLEOLIN 1 (NUC1)	Encodes ATNUC-L1 (NUCLEOLIN LIKE 1), the predominant form of the two nucleolin proteins found in Arabidopsis. This protein is involved in rRNA processing, ribosome biosynthesis, and vascular pattern formation. PARL1 localizes to the nucleolus and parl1 mutants accumulate elevated levels of the unspliced 35S pre-rRNA. parl1 mutants also have defects in cotyledon, leaf, sepal, and petal vein patter…		26.2206	25.8696	26.0168	25.4664	25.4608	26.0035	0.392103	1.1265	6	6	6	12.6	12.6	12.6	17.091	61426000	85593000	86107000	6962900	7621600	12915000	42554000	48112000	49995000	51943000	41381000	63445000	10	GFDASLSEDDIK;GFGHVEFASSEEAQK;GIAYLEFSEGK;NVSVPIDR;SSDVEMVDAEK;TLFAANLSFNIER
AT5G18380	AT5G18380.2;AT5G18380.1;AT5G18380.3	RIBOSOMAL PROTEIN US9X (US9X)	RIBOSOMAL PROTEIN US9X (US9X)	Ribosomal protein S5 domain 2-like superfamily protein;(source:Araport11)		31.2057	30.748	30.9075	27.7967	25.363	27.4122	4.09645	1.83612	8	8	1	54.9	54.9	6.9	31.575	1945499999.9999998	2517600000	2554300000	35016000	7122200	34289000	1324800000	899010000	1078000000	69208000	13451000	29652000	65	ALVAYYQK;ATQPATESVQCFGR;EIKDILVR;FAGVNMR;IFEPVLLLGK;LNGCPIELFQPEILR;TAVAVTHCK;TLLVADPR
AT3G56340	AT3G56340.1	RIBOSOMAL PROTEIN S26E (RPS26E)	RIBOSOMAL PROTEIN S26E (RPS26E);RIBOSOMAL PROTEIN ES26X (ES26X)	Small ribosomal subunit protein.		31.0873	30.2882	30.6401	26.7021	27.0296	26.0804	4.06784	3.67091	6	6	3	42.3	42.3	23.8	75.322	1792199999.9999998	1830599999.9999998	2122099999.9999998	16397000	22611000	13622000	1271100000	819200000	1132000000	85436000	96690000	61898000	53	DVQEASVYEGYTLPK;EDTPKPAQPGQAPR;GHVKPIR;NIVEQAAIR;NIVEQAAIRDVQEASVYEGYTLPK;PAGGAPAAPR
AT1G49970	AT1G49970.1	CLP PROTEASE PROTEOLYTIC SUBUNIT 1 (CLPR1)	CLP PROTEASE PROTEOLYTIC SUBUNIT 1 (CLPR1);NUCLEAR CLPP 5 (NCLPP5);SUPPRESSOR OF VARIEGATION 2 (SVR2); (CLPR1)	Encodes a ClpP-related sequence. Though similar to ClpP proteins, this does not contains the highly conserved catalytic triad of Ser-type proteases (Ser-His-Asp). The name reflects nomenclature described in Adam et. al (2001).		24.6408	24.3263	25.243	25.0296	26.406	22.4561	0.10615	0.329636	3	3	3	9.3	9.3	9.3	31.056	20550000	29368000	50360000	5143900	14675000	1104700	25606000	20859000	29862000	27513000	29046000	24159000	10	IADSQDSSFEK;SKEQINEDIK;YLQAQAAIDYGIADK
ATCG00650	ATCG00650.1	RIBOSOMAL PROTEIN S18 (RPS18)	RIBOSOMAL PROTEIN S18 (RPS18);RIBOSOMAL PROTEIN BS18C (BS18C)	chloroplast-encoded ribosomal protein S18		28.6717	27.6207	28.5414	24.6897	24.5211	23.5398	4.02775	3.21943	5	5	5	35.6	35.6	35.6	12.534	335920000	288120000	495460000	4064100	3973600	2341300	467900000	462770000	552290000	173390000	153590000	145570000	28	FISEQGK;ILSLLPFLNNQK;LPPIQSGDR;NMSLISR;RLPPIQSGDR
AT1G50480	AT1G50480.1	10-FORMYLTETRAHYDROFOLATE SYNTHETASE (THFS)	10-FORMYLTETRAHYDROFOLATE SYNTHETASE (THFS)	10-formyltetrahydrofolate synthetase (THFS) mRNA, complete The mRNA is cell-to-cell mobile.		23.1573	25.6624	24.4827	25.7024	26.6565	24.8611	-1.30586	0.952028	4	4	4	10.3	10.3	10.3	30.46	7348800	74144000	29731000	8200100	17458000	5850700	10134000	29738000	13745000	24692000	35782000	19346000	15	ACQNITQPLR;LVGPGGFVVTEAGFGSDIGTEK;STTTVGLCQALGAYLDKK;SYGASGVEYSDQAEK
AT5G48760	AT5G48760.2;AT5G48760.1	RIBOSOMAL PROTEIN UL13W (UL13W)	(RPL13AD);RIBOSOMAL PROTEIN UL13W (UL13W)	Ribosomal protein L13 family protein;(source:Araport11)		28.5188	27.6383	28.2533	24.049	23.7406	24.6682	3.98422	3.63835	8	3	3	41.3	15	15	21.805	302140000	291670000	405770000	2606800	2313300	5118400	247980000	128880000	212290000	21521000	16493000	28941000	33	AHVVYER;CEEICLSGGLVR;LGAQLDILAPVKY;LSSEVGWNHYDTIK;MNTKPSHGPIHFR;MVIPDALK;RVVVDAR;VYEGVPTPYDK
AT1G51500	AT1G51500.1	ATP-BINDING CASSETTE G12 (ABCG12)	WHITE-BROWN COMPLEX 12 (WBC12);ATP-BINDING CASSETTE G12 (ABCG12); (D3);ECERIFERUM 5 (CER5);ARABIDOPSIS THALIANA WHITE-BROWN COMPLEX 12 (ATWBC12); (AtABCG12)	Encodes an ABC transporter involved in cuticular wax biosynthesis. Lines carrying recessive mutations in this locus have weakly glaucous stem surface, and relative elevated secondary alcohols and ketones.		24.0664	22.7786	22.9712	21.4863	24.7693	24.7934	-0.411	0.424546	2	2	2	5.4	5.4	5.4	7.7169	13800000	10045000	10428000	0	0	0	9939500	10636000	11461000	0	0	0	8	FAVEFFAEAGFPCPK;GAYLAWEDLTVVIPNFSGGPTR
AT1G51980	AT1G51980.2;AT1G51980.1;AT3G16480.1	0	0	Insulinase (Peptidase family M16) protein;(source:Araport11)		23.9204	24.035	25.0248	24.8064	24.4782	24.2538	-0.186058	0.478482	5	5	5	17.1	17.1	17.1	18.748	12472000	23998000	43292000	4406500	3857100	0	16012000	17049000	15031000	15840000	13145000	0	6	EIEAIGGNTSASASR;MVLAASGVEHEELLK;NPAFLDWEVNEELRK;QHTGGEATHFAVAFEVPGWNNEK;SQYVGGDFR
AT1G61580	AT1G61580.1	R-PROTEIN L3 B (RPL3B)	R-PROTEIN L3 B (RPL3B);RIBOSOMAL PROTEIN UL3Y (UL3Y);ARABIDOPSIS RIBOSOMAL PROTEIN 2 (ARP2)	R-protein L3 B;(source:Araport11)		27.6154	26.2477	27.8304	23.6185	23.2642	22.8967	3.9714	2.4314	16	8	8	39.7	24.9	24.9	55.081	161530000	111240000	302680000	1934200	1662700	1499200	57747000	23491000	102450000	5906600	4480700	3428700	28	AFPKDDPTKPCR;AGMTHIVR;AHLNEIQINGGDIAK;DEMIDIIGVTK;DIQSQLEK;FIDAASNGGHGR;GKGYEGVVTR;GYEGVVTR;HGSLGFLPR;KVACIGAWHPAR;KVDYACSLFEK;QVPVDAIFQK;SLCTVWAQHLSEELR;VACIGAWHPAR;VGQETHSAMTEYDR;VLAHTQIR
AT1G52230	AT1G52230.1	PHOTOSYSTEM I SUBUNIT H2 (PSAH2)	PHOTOSYSTEM I SUBUNIT H2 (PSAH2);PHOTOSYSTEM I SUBUNIT H-2 (PSAH-2); (PSI-H)	Phosphorylation of this protein is dependent on calcium. The mRNA is cell-to-cell mobile.		24.2016	24.9861	24.4831	26.8515	25.6015	25.4029	-1.39505	1.44338	3	3	2	25.5	25.5	17.9	96.328	15156000	46397000	29740000	18186000	8402700	8517600	9955100	19869000	13578000	39354000	22464000	18856000	14	FFETFAAPFTK;FLILGGGSLLTYVSANSTGDVLPIK;FLILGGGSLLTYVSANSTGDVLPIKR
AT1G52360	AT1G52360.3;AT1G52360.4;AT1G52360.1;AT1G52360.2;AT3G15980.5	BETA PRIME1-COP (B?1-COP)	BETA PRIME1-COP (B?1-COP)	Part of Coat Protein Complexes (COPs). The presence of &#946;?1-COP and &#946;?2-COP is required for female and male gametophyte development.		25.8956	25.638	25.909	25.8622	26.2962	26.3407	-0.352129	1.17433	7	7	3	11.1	11.1	3.9	22.835	49038000	72902000	79907000	9160400	13600000	16316000	18573000	27115000	19912000	26767000	38066000	30898000	25	ASEILPTIPK;DQHNSVAHFLESR;GVNCVDYFTGGDKPYLITGSDDHTAK;LENTLNYGLER;SFEVTELPVR;SFGSGLEFVWSSEGECAVR;SIGADYEVTDGER
AT1G52370	AT1G52370.4;AT1G52370.3;AT1G52370.2;AT1G52370.1	RIBOSOMAL PROTEIN UL22MZ (UL22MZ)	RIBOSOMAL PROTEIN UL22MZ (UL22MZ)	Ribosomal protein L22p/L17e family protein;(source:Araport11)		23.4981	23.2365	23.719	23.036	22.8016	22.9692	0.548922	1.69762	3	1	1	11.9	4.5	4.5	3.0014	9306900	13798000	17511000	0	0	0	13515000	12085000	15920000	0	0	0	6	ETTAEEEAEIAR;LIETSPIWNR;LLVAEAFVGK
AT1G52400	AT1G52400.2;AT1G52400.3;AT1G52400.1	BETA GLUCOSIDASE 18 (BGLU18)	BETA-GLUCOSIDASE HOMOLOG 1 (BGL1);BETA GLUCOSIDASE 18 (BGLU18);A. THALIANA BETA-GLUCOSIDASE 1 (ATBG1)	encodes a member of glycosyl hydrolase family 1, located in inducible ER bodies which were formed after wounding, required in inducible ER body formation The mRNA is cell-to-cell mobile.		25.0541	25.7611	25.7924	29.7991	29.363	29.3441	-3.96624	3.64877	7	6	5	27.3	25.4	23.9	119.29	27367000	79391000	73701000	140300000	113960000	130840000	20990000	23546000	22548000	316460000	222680000	190560000	34	IGIAHSPAWFEPQDLEHVGGSIER;LNFPEGFIWGTATAAFQVEGAVNEGCR;LSIAWPR;NNIIPLVTVFHWDTPQDLEDEYGGFLSGR;SPSWTTDSLVDWDSK;VGVQFYHDLIDELLK;YKEDIQLMK
AT2G34480	AT2G34480.1;AT2G34480.2	(RPL18AB)	(RPL18AB);RIBOSOMAL PROTEIN EL20Y (EL20Y)	Encodes a nuclear localized member of the ribosomal L18ae/LX protein family. Loss of function mutations show reduced transmission through the gametophytes and embryo lethality.		30.9024	30.0946	30.9106	27.1606	27.2716	25.5786	3.96559	2.39838	7	7	4	32	32	19.1	52.711	1576599999.9999998	1600699999.9999998	2559800000	22531000	26741000	9620500	765120000	517060000	832660000	78766000	78739000	26103000	79	ALPTEKDVQPK;ANKPNLFM;FPCIQIIK;KSNGQMLAINEIYEK;LWATNEVR;NFGIWLR;SNGQMLAINEIYEK
AT1G52570	AT1G52570.3;AT1G52570.2;AT1G52570.1	PHOSPHOLIPASE D ALPHA 2 (PLDALPHA2)	PHOSPHOLIPASE D ALPHA 2 (PLDALPHA2)	member of C2-PLD subfamily		24.1897	25.0548	25.0506	26.5548	27.0102	26.0148	-1.76155	2.20934	4	2	2	4.9	3	3	18.603	15032000	48658000	44074000	14805000	22309000	13017000	21694000	28698000	28746000	87920000	87869000	52947000	12	DGLMATHDEETENFFR;IVSFVGGLDLCDGR;IVSFVGGLDLCDGRYDTPFHSLFR;YDTPFHSLFR
AT1G66260	AT1G66260.2;AT1G66260.1	(ALY3)	NVOLVED IN RRNA PROCESSING 8 (IRP8); (ALY3)	RNA-binding (RRM/RBD/RNP motifs) family protein;(source:Araport11)		26.8991	25.8024	26.9376	22.8247	21.5658	23.3673	3.96041	2.57944	4	4	4	24.1	24.1	24.1	47.252	98314000	81702000	163010000	0	0	0	48710000	28877000	47703000	0	0	0	25	AVGVSGVEVGTTVYITNLDQGVTNEDIR;ELYAEIGELKR;LEILGGNTESAPVAAR;SLPWQNQNDLYEETLR
AT1G53210	AT1G53210.1	NA+/CA2+ EXCHANGER (NCL)	NA+/CA2+ EXCHANGER (NCL); (ATNCL)	Encodes a Na+/Ca 2+ exchanger-like protein that participates in the maintenance of Ca 2+ homeostasis. The mRNA is cell-to-cell mobile.		25.0209	24.0682	24.1234	25.8014	25.9447	25.6083	-1.38062	1.73695	3	3	3	8.2	8.2	8.2	22.288	26743000	24557000	23177000	8782400	10659000	9820700	11758000	26083000	21260000	48489000	50823000	37137000	7	ALIIGISFEDIDFDKDDAVGK;LLDDEGQPDEHVIR;TLDEQVDQEEFVR
AT1G53240	AT1G53240.1	MITOCHONDRIAL MALATE DEHYDROGENASE 1 (mMDH1)	MITOCHONDRIAL MALATE DEHYDROGENASE 1 (mMDH1)	mMDH1 encodes a mitochrondrial malate dehydrogenase. It is expressed at higher levels than the other mitochrondrial isoform mMDH2 (At3G15020) according to transcript and proteomic analyses.		25.4762	26.6758	25.9571	28.7633	29.0127	28.319	-2.66199	2.54614	6	6	6	28.7	28.7	28.7	184.61	36667000	149670000	82615000	68431000	89392000	64290000	25085000	49189000	31520000	212970000	179650000	112460000	39	EGLEALKPELK;GLNGVPDVIECSYVQSTITELPFFASK;LNPLVSSLSLYDIANTPGVAADVGHINTR;NGVEEVLDLGPLSDFEK;NGVEEVLDLGPLSDFEKEGLEALKPELK;SEVVGYMGDDNLAK
AT1G53280	AT1G53280.2;AT1G53280.1	DJ-1 HOMOLOG B (DJ1B)	DJ-1 HOMOLOG B (DJ1B);DJ-1 HOMOLOG B (AtDJ1B); (DJ-1B)	Encodes a homolog of animal DJ-1 superfamily protein. In the A. thaliana genome, three genes encoding close homologs of human DJ-1 were identified AT3G14990 (DJ1A), AT1G53280 (DJ1B) and AT4G34020 (DJ1C). Among the three homologs, DJ1C is essential for chloroplast development and viability. It exhibits glyoxalase activity towards glyoxal and methylglyoxal.		22.9753	22.1075	21.9094	21.5685	23.1006	21.8077	0.171827	0.407445	2	2	2	10.9	10.9	10.9	7.3241	6477900	6308800	4995400	0	0	0	4802000	5149800	4668700	0	0	0	2	ANVVVAALGNSLEVVASR;NSYDLIVLPGGLGGAEAFASSEK
AT1G53310	AT1G53310.3;AT1G53310.2;AT1G53310.1	PHOSPHOENOLPYRUVATE CARBOXYLASE 1 (PPC1)	PHOSPHOENOLPYRUVATE CARBOXYLASE 1 (ATPPC1);PEP(PHOSPHOENOLPYRUVATE) CARBOXYLASE 1 (PEPC1); (ATPEPC1);PHOSPHOENOLPYRUVATE CARBOXYLASE 1 (PPC1)	Encodes one of four Arabidopsis phosphoenolpyruvate carboxylase proteins.Plays an important role in carbon and nitrogen metabolism.		23.6459	23.5941	24.036	26.3436	21.3932	23.4846	0.0181949	0.304932	7	2	1	9.9	3.5	2.3	15.177	10311000	17679000	21814000	0	0	0	11578000	11168000	13638000	0	0	0	6	DITPDDKQELDEALQR;HYIEFWK;KLEELGSVLTSLDPGDSIVIAK;LATPELEYGR;LSAAWQLYK;VTIDLIEMVFAK;VTVQGEVIEQSFGEEHLCFR
AT3G14790	AT3G14790.1;AT3G14790.2;AT1G53500.1	0	0	rhamnose biosynthesis 3;(source:Araport11)		24.8261	23.6633	23.2125	22.827	23.4372	23.0693	0.789439	0.926232	4	4	1	6.9	6.9	1.5	5.7252	23365000	18548000	12327000	1117500	1874600	1689800	18467000	9960600	9885200	6573800	5190400	6748800	10	MPISSDLNNPR;SYLYCEDVAEAFEVVLHK;TGWLGGLLGK;YFLDDQK
AT1G14320	AT1G14320.1;AT1G14320.2	SUPPRESSOR OF ACAULIS 52 (SAC52)	SUPPRESSOR OF ACAULIS 52 (SAC52);RIBOSOMAL PROTEIN L10 (RPL10);RIBOSOMAL PROTEIN L10 A (RPL10A);RIBOSOMAL PROTEIN UL16Z (UL16Z)	Encodes a ribosomal protein L10 and may be involved in translation regulation. Semi-dominant mutations in SAC552 can suppress defects in acaulis5, which encodes a thermospermine synthase, by enhancing translation of acl5 and itself.		33.0695	32.3106	33.1281	28.4304	28.9494	29.3717	3.9189	3.60647	12	12	3	42.3	42.3	9.5	137.03	7081099999.999999	7436599999.999999	11905000000	54329000	85552000	133360000	6697299999.999999	5249600000	8043999999.999999	326150000	418290000	493140000	97	CKDAHGHHAQEALR;DAHGHHAQEALR;ENVSSEALEAAR;FLSCHGPLANR;GVDEFPFCVHLVSWEK;IYDVGMK;KGVDEFPFCVHLVSWEK;KGVDEFPFCVHLVSWEKENVSSEALEAAR;QPGSAFLPAHY;RVVPDGVNAK;VAIGQVLLSVR;VVPDGVNAK
ATCG01130	ATCG01130.1	(YCF1.2)	(YCF1.2);TRANSLOCON AT THE INNER ENVELOPE MEMBRANE OF CHLOROPLASTS 214 (TIC214)	Ycf1 protein;(source:Araport11)		26.0375	25.3856	25.087	22.2085	21.3437	21.2123	3.91517	3.40995	6	6	6	3.9	3.9	3.9	14.92	54105000	61199000	45198000	727890	439230	0	20548000	20601000	19480000	9487500	6849100	0	16	IEALDKEWSVENILEK;KFEQTIEK;LSVQNDGQLIIYR;NWLTDGIQIK;SLEWTNSSLSEK;TFLNSEVNQWK
AT1G53750	AT1G53750.1	REGULATORY PARTICLE TRIPLE-A 1A (RPT1A)	REGULATORY PARTICLE TRIPLE-A 1A (RPT1A)	26S proteasome AAA-ATPase subunit RPT1a (RPT1a) mRNA,		24.5974	24.7324	24.719	24.7451	25.704	25.3027	-0.56764	1.05729	2	2	2	6.8	6.8	6.8	6.3365	19940000	38916000	35023000	4223200	9021300	7945700	21616000	21425000	24078000	24685000	34379000	32212000	8	ACIVFFDEVDAIGGAR;FDDGVGGDNEVQR
AT1G54050	AT1G54050.2;AT1G54050.1	(HSP17.4B)	(HSP17.4B)	Plays a role in promoting proper protein folding in response to heat stress.		28.9975	28.9666	29.0513	29.1779	29.7468	29.2501	-0.386456	1.0944	8	8	8	57.4	57.4	57.4	116.57	421020000	732400000	705500000	91213000	148690000	122580000	278080000	287790000	313670000	236170000	215210000	193730000	68	EYIFYLDIPGISK;FRLPEDADMASVTAK;GSSNNIPIDILESPK;LILPISR;LPEDADMASVTAK;SAVAINHFFGLPEAIEK;SDIQVTVEEER;YQEGVLTVVIK
AT1G54080	AT1G54080.1;AT1G54080.2	OLIGOURIDYLATE-BINDING PROTEIN 1A (UBP1A)	OLIGOURIDYLATE-BINDING PROTEIN 1A (UBP1A)	oligouridylate-binding protein 1A;(source:Araport11)		21.9724	22.1514	22.6184	22.7104	23.9342	20.4425	-0.114933	0.336507	2	2	2	10.3	10.3	10.3	14.7	3232500	0	8165900	0	0	0	7096100	0	9632900	0	0	0	4	LFYTLGAGVIEEVR;SVYAGNIHTQVTEILLQEIFASTGPIESCK
AT1G01100	AT1G01100.4;AT1G01100.2;AT1G01100.1;AT1G01100.3	60S ACIDIC RIBOSOMAL PROTEIN P1-1 (RPP1A)	60S ACIDIC RIBOSOMAL PROTEIN P1-1 (RPP1A);RIBOSOMAL PROTEIN P1W (P1W);RPP1 CO-ORTHOLOGOUS GENE 1 (RPP1.1)	Co-orthologous gene of large ribosomal subunit protein RPP1.		26.997	26.608	26.4428	20.3785	26.9811	20.9926	3.89855	0.989869	2	2	1	51.8	51.8	34.8	45.363	105220000	142800000	115680000	0	21863000	0	83943000	61410000	58475000	0	101250000	0	10	KKDEPAEESDGDLGFGLFD;NVTDLIMNVGAGGGGGAPVAAAAPAAGGGAAAAPAAEEK
AT1G54780	AT1G54780.1	THYLAKOID LUMEN PROTEIN 18.3 (TLP18.3)	(ATTLP18.3);THYLAKOID LUMEN PROTEIN 18.3 (TLP18.3)	Encodes a thylakoid lumen protein regulating photosystem II repair cycle. Has acid phosphatase activity. The mRNA is cell-to-cell mobile.		27.0219	26.7757	26.956	27.5612	27.6079	27.8513	-0.755635	2.78352	5	5	5	27.7	27.7	27.7	55.991	107050000	160400000	165100000	29743000	33761000	46489000	75920000	70525000	76869000	86275000	91701000	92798000	26	ADAFEYADQVLEK;EGAITGGPAFIEAVGENILDATVSENLPVLATDEK;ETYVVDDAGVLSR;LVAAIDGQPDPGGPTVK;RLVAAIDGQPDPGGPTVK
AT1G55490	AT1G55490.5;AT1G55490.4;AT1G55490.3;AT1G55490.2;AT1G55490.1	CHAPERONIN 60 BETA (CPN60B)	(CPNB1);CHAPERONIN 60 BETA (CPN60B);CHAPERONIN-60BETA1 (CPN60BETA1);LESION INITIATION 1 (LEN1)	encodes the beta subunit of the chloroplast chaperonin 60, a homologue of bacterial GroEL. Mutants in this gene develops lesions on its leaves, expresses systemic acquired resistance (SAR) and develops accelerated cell death to heat shock stress. The protein has molecular chaperone activity for suppressing protein aggregation in vitro.		27.736	28.2707	27.7501	29.6128	29.8506	29.8183	-1.84161	2.7385	16	16	2	34.7	34.7	5.5	148.11	175610000	452130000	286290000	123300000	159780000	181750000	51581000	77667000	57956000	134580000	172150000	151060000	94	AAVEEGIVVGGGCTLLR;ATLDNDEEKVGADIVKR;CCLEHAASVAK;DLVGVLEDAIR;EEVGLSLDK;ETSTIVGDGSTQDAVK;EVELEDPVENIGAK;IVNDGVTVAR;KSQYLDDIAILTGATVIREEVGLSLDK;LRVEDALNATK;LSGGVAVIQVGAQTETELK;LSGGVAVIQVGAQTETELKEK;NLIEQAEQDYEK;NLIEQAEQDYEKEK;TNDLAGDGTTTSVVLAQGFIAEGVK;YEDLMAAGIIDPTK
AT1G55670	AT1G55670.1	PHOTOSYSTEM I SUBUNIT G (PSAG)	PHOTOSYSTEM I SUBUNIT G (PSAG)	Encodes subunit G of photosystem I, an 11-kDa membrane protein that plays an important role in electron transport between plastocyanin and PSI and is involved in the stability of the PSI complex. PSI-G subunit is bound to PSI-B and is in contact with Lhca1. The protein inserts into thylakoids by a direct or "spontaneous" pathway that does not involve the activities of any known chloroplast protei…		26.6087	25.3059	25.0743	25.6828	25.1158	26.2547	-0.0214147	0.313131	2	2	2	10	10	10	4.0028	80391000	57911000	44804000	8089200	6000600	15372000	68938000	50711000	40724000	48324000	19912000	62895000	14	EYVSLLK;THFEAGDDR
AT1G56070	AT1G56070.3;AT1G56070.2;AT1G56070.1	LOW EXPRESSION OF OSMOTICALLY RESPONSIVE GENES 1 (LOS1)	LOW EXPRESSION OF OSMOTICALLY RESPONSIVE GENES 1 (LOS1);LOW EXPRESSION OF OSMOTICALLY RESPONSIVE GENES 1 (AT1G56075.1)	encodes a translation elongation factor 2-like protein that is involved in cold-induced translation. Mutations in this gene specifically blocks low temperature-induced transcription of cold-responsive genes but induces the expression of CBF genes and mutants carrying the recessive mutations fail to acclimate to cold and is freezing sensitive.		28.6788	29.2123	28.9561	29.5007	29.4465	29.5658	-0.555278	1.50322	20	20	13	35.7	35.7	24.4	323.31	337560000	868340000	660470000	114080000	120750000	152570000	72552000	90472000	88575000	101760000	106030000	109220000	138	AYLPVVESFGFSSQLR;DGNEYLINLIDSPGHVDFSSEVTAALR;DLQDDFMGGAEIIK;EAMTPLSEFEDKL;EGPLAEENMR;FSVSPVVR;GFVQFCYEPIK;ILAEEFGWDKDLAK;IMGPNYIPGEK;ITDGALVVVDCIEGVCVQTETVLR;LWGENFFDPATR;NATLTNEKEVDAHPIR;PMEEGLAEAIDDGR;RGFVQFCYEPIK;RQETVEDVPCGNTVAMVGLDQFITK;STGISLYYEMTDESLK;STLTDSLVAAAGIIAQEVAGDVR;VENLYEGPLDDQYANAIR;VIENANVIMATYEDPLLGDVQVYPEK;YRVENLYEGPLDDQYANAIR
AT2G09990	AT2G09990.1	RIBOSOMAL PROTEIN US9Z (US9Z)	RIBOSOMAL PROTEIN US9Z (US9Z)	Ribosomal protein S5 domain 2-like superfamily protein;(source:Araport11)		25.9507	25.9285	25.9505	22.9555	21.404	21.8099	3.88676	2.15588	8	1	1	54.1	6.8	6.8	4.269	50947000	89160000	82238000	0	0	0	73981000	78096000	74767000	0	0	0	12	ALVAYYQK;ATQPATESVQCFGR;EIKDILVR;FAGVNMR;IFEPILLLGK;LNGCPIELFQPEILR;TAVAVTHCK;TLLVADPR
AT1G56190	AT1G56190.2;AT1G56190.1	(CPGK2)	(CPGK2); (PGKP2); (PGK2)	One of a pair of plastid localized phosphoglycerate kinases involved in galactolipid biosynthesis. Functions redundantly with AT3g12780 (PGK1) in the chloroplast in the biosynthesis of thylakoid membrane galactolipids. Double mutants are photosynthetically incompetent, plants are albino and seedling lethal.		23.526	24.6768	23.8654	24.3641	24.4512	25.1792	-0.642098	0.972272	10	2	1	33.6	8.1	4.4	10.586	9488700	37445000	19382000	3243100	0	7294000	8224900	19815000	11814000	23499000	0	24636000	8	ADLNVPLDDNQNITDDTR;FLKPSVAGFLLQK;FSLAPLVPR;GVSLLLPTDVVIADK;GVTTIIGGGDSVAAVEK;IGVIESLLEK;KLASLADLYVNDAFGTAHR;LASLADLYVNDAFGTAHR;RPFAAIVGGSK;VGVAGVMSHISTGGGASLELLEGK
AT4G02080	AT4G02080.1;AT3G62560.1;AT1G56330.1;AT1G02620.1;AT1G09180.1	SECRETION-ASSOCIATED RAS SUPER FAMILY 2 (SAR2)	(ASAR1); (ATSARA1C);SECRETION-ASSOCIATED RAS SUPER FAMILY 2 (ATSAR2);SECRETION-ASSOCIATED RAS SUPER FAMILY 2 (SAR2); (SAR1C)	A member of ARF-like GTPase family. A thaliana has 21 members, in two subfamilies, ARF and ARF-like (ARL) GTPases.		23.7059	24.1206	24.4466	25.4766	25.9764	26.2957	-1.8252	2.6143	2	2	2	16.6	16.6	16.6	4.1178	10749000	25465000	28996000	7012000	10896000	15815000	23486000	23074000	30522000	25138000	33227000	37178000	3	IDIPYAASEDELR;LVQHQPTQHPTSEELSIGK
AT1G56340	AT1G56340.1;AT1G56340.2	CALRETICULIN 1A (CRT1a)	CALRETICULIN 1 (CRT1);CALRETICULIN 1A (CRT1a); (AtCRT1a)	Encodes one of three Arabidopsis calreticulins. In CRT-deficient mouse fibroblasts, this protein restores ER Ca2+ levels. Post-transcriptionally regulates together with CRT2 VAMP721/722 levels under ER stress. Loss-of-function results in activation of the ethylene signaling pathway, reduced susceptibility to Verticillium longisporum.		22.8687	24.1898	23.7301	29.2139	29.1237	29.9571	-5.83538	3.61621	9	9	7	26.1	26.1	21.6	63.606	6016300	26717000	17646000	93516000	96540000	200100000	3473800	6527300	5266400	152110000	137180000	239820000	26	EAEETKEAEETDAAHDEL;FEDGWEK;GIQTSEDYR;KDDNTAGEWK;KPEDWDDEEDGEWTAPTIPNPEYNGEWKPK;LAEETWGK;LLSDDVDQTK;SGSLFDNVLVSDDPEYAK;SGSLFDNVLVSDDPEYAKK
AT1G57720	AT1G57720.2;AT1G57720.1	0	0	Translation elongation factor EF1B, gamma chain;(source:Araport11)		27.1781	27.2309	27.6507	26.9212	27.4472	26.8014	0.296604	0.819568	6	6	3	21.1	21.1	10.9	69.905	119290000	219900000	267220000	19086000	30202000	22454000	44602000	53057000	62805000	50315000	48677000	49633000	52	AAPVAEAPKPAEEEEAPKPK;ALIAAEYAGVK;IEESADFQMGVTNK;MLICGSEGPFK;VDISDEAQKER;VSQMIEDAEPFEGEALLDAK
ATCG00380	ATCG00380.1	CHLOROPLAST RIBOSOMAL PROTEIN S4 (RPS4)	RIBOSOMAL PROTEIN US4C (US4C);CHLOROPLAST RIBOSOMAL PROTEIN S4 (RPS4)	Chloroplast encoded ribosomal protein S4		31.2841	30.6682	31.0463	26.7903	27.6726	27.0086	3.84234	3.54913	9	9	9	48.8	48.8	48.8	61.113	2054099999.9999998	2382100000	2812200000	17430000	35309000	25922000	885940000	637690000	865570000	73922000	115450000	58007000	107	DIITVKDEQNSR;FHYGLTEHQLLK;IVDIPSYR;LDNILFR;LGALPGLTSK;LGMALTIPQAR;RLGALPGLTSK;TLVQNLLDSSAPEELPNHLTLHTFQYEGLVNQIIDR;TLVQNLLDSSAPEELPNHLTLHTFQYEGLVNQIIDRK
AT1G59610	AT1G59610.1	DYNAMIN-LIKE 3 (DL3)	DYNAMIN-LIKE 3 (ADL3);DYNAMIN-LIKE 3 (DL3);DYNAMIN RELATED PROTEIN 2B (DRP2B)	A high molecular weight GTPase whose GTP-binding domain shows a low homology to those of other plant dynamin-like proteins.Contains a pleckstrin homologous domain. DRP2B and DRP1A participate together in clathrin-coated vesicle formation during endocytosis. The mRNA is cell-to-cell mobile.		28.1796	28.4731	28.6185	27.348	28.3914	27.7437	0.596033	1.04777	23	11	11	33.2	17.9	17.9	129.48	238820000	520200000	522670000	25656000	58109000	43149000	79515000	88139000	103040000	52531000	78437000	41302000	51	AAAASSWSDNSGTESSPR;APIIIDLSR;EVVAIASAALDGFK;EVVAIASAALDGFKNEAK;FLLHLAGGEGSGWK;GTVTLEECSIEEISDDEGEK;IESLIQEDQNVK;IESLIQEDQNVKR;IVLEADGYQPYLISPEK;KGQDAEQSLLNR;KPVDPEEELR;LCVDEVHR;LGEQLVSSAEGTR;LIDLPGLDQR;QAASLLADEDPDETSSSR;RPATSLNVVALGNVGAGK;SAVLNSLIGHPVLPTGENGATR;SILTGAPQSK;SKEDMLNQLYSSISAIGNER;SQIVQDELAR;TAGPEGEITAGYLMK;VLVDIVSASANATPGLGR;VVASFEGNFPNR
AT1G59860	AT1G59860.1	(HSP17.6A)	(HSP17.6A)	HSP20-like chaperones superfamily protein;(source:Araport11)		26.5153	23.3723	26.0189	25.1569	24.8347	24.9408	0.324707	0.413754	11	2	2	51.6	12.3	12.3	65.939	75351000	15160000	86230000	5618500	4938400	6183100	81422000	28149000	54764000	26608000	21009000	23059000	14	ASMENGVLTVTVPK;EEVKVEIEDDSVLK;ETAEAHVFK;FRLPENVK;INNNIFDPFSLDVWDPFK;KEEVKVEIEDDSVLK;RINNNIFDPFSLDVWDPFK;SLIPSFFGNNR;SLIPSFFGNNRR;VDWKETAEAHVFK;VEIEDDSVLK
AT1G80070	AT1G80070.1;AT4G38780.1	ABNORMAL SUSPENSOR 2 (SUS2)	ABNORMAL SUSPENSOR 2 (SUS2);SUCROSE SYNTHASE 2 (SUS2);EMBRYO DEFECTIVE 33 (EMB33);EMBRYO DEFECTIVE 177 (EMB177);EMBRYO DEFECTIVE 14 (EMB14);PRE-MRNA PROCESSING 8 (PRP8)	Encodes a factor that influences pre-mRNA splicing and is required for embryonic development. Mutations result in an abnormal suspensor and embryo lethality. The mRNA is cell-to-cell mobile.		27.9897	28.0561	28.1398	23.0698	24.8141	24.8059	3.83191	1.96548	13	13	13	8.4	8.4	8.4	107.88	209370000	389620000	375070000	1322300	4868400	5631200	80152000	95144000	76057000	2723000	5857200	6601500	45	DIILGAEITPPSQQR;EATVHTQELLDLLVK;EELGLIEQAYDNPHEALSR;LAGQLLSDLIDR;QRVESHFDLELR;RAEDIPLVSEWFK;RLTLEDLEDSWDR;TAEEVAALVR;TDVIQALGGVEGILEHTLFK;TQIAGYLYGISPPDNPQVK;TTNVHGDELIVTTTSPYEQSAFGSK;WGDYDSHDIER;YIQPWESEFIDSQR
AT1G60710	AT1G60710.1;AT1G60680.2;AT1G60750.1;AT1G60730.1;AT1G60690.1;AT1G60680.1;AT1G60730.3	(ATB2)	(ATB2)	Encodes ATB2.		24.1789	24.4713	24.2243	24.8611	24.4348	25.945	-0.7888	0.962456	2	2	2	7	7	7	5.464	14919000	32472000	24856000	0	3742800	0	21371000	16661000	22292000	0	21380000	0	6	DVEEEIIPTCR;YIGLSEASASTIR
AT2G02130	AT2G02130.1	LOW-MOLECULAR-WEIGHT CYSTEINE-RICH 68 (LCR68)	LOW-MOLECULAR-WEIGHT CYSTEINE-RICH 68 (LCR68); (PDF2.3)	Predicted to encode a PR (pathogenesis-related) protein. Belongs to the plant defensin (PDF) family with the following members: At1g75830/PDF1.1, At5g44420/PDF1.2a, At2g26020/PDF1.2b, At5g44430/PDF1.2c, At2g26010/PDF1.3, At1g19610/PDF1.4, At1g55010/PDF1.5, At2g02120/PDF2.1, At2g02100/PDF2.2, At2g02130/PDF2.3, At1g61070/PDF2.4, At5g63660/PDF2.5, At2g02140/PDF2.6, At5g38330/PDF3.1 and At4g30070/PDF…		26.1732	26.3884	27.0763	23.3718	22.0102	22.7813	3.82487	2.96717	2	2	2	31.2	31.2	31.2	41.791	59441000	122640000	179460000	0	0	0	45567000	66673000	151520000	0	0	0	4	FKGPCVSTHNCANVCHNEGFGGGK;GPCVSTHNCANVCHNEGFGGGK
AT1G60900	AT1G60900.1;AT1G60830.2;AT1G60830.1	(U2AF65B)	(U2AF65B); (ATU2AF65B)	Putative U2A65 splicing factor which functions in abscisic acid mediated flowering via regulating the precursor messenger RNA splicing of ABI5 and FLC in shoot apex. Regulates flowering time and displays a redundant role in pollen tube growth together with AtU2AF65a.		21.43	23.1928	20.575	26.0134	25.7706	25.563	-4.0497	1.80451	6	6	6	17.8	17.8	17.8	42.635	0	0	0	10173000	9447200	9517300	0	0	0	39385000	28380000	29741000	12	ELLESFGPLR;FGNLVNVVIPR;FGNLVNVVIPRPNPDHDPTPGVGK;KFGGNQVVAVYYPEDK;RPTDYNPSLAATLGPSQPNPNLNLGAVGLSSGSTGGLEGPDR;VFLEYADVDGSSK
AT1G61520	AT1G61520.2;AT1G61520.3;AT1G61520.1	PHOTOSYSTEM I LIGHT HARVESTING COMPLEX GENE 3 (LHCA3)	PHOTOSYSTEM I LIGHT HARVESTING COMPLEX GENE 3 (LHCA3)	PSI type III chlorophyll a/b-binding protein (Lhca3*1) The mRNA is cell-to-cell mobile.		29.5837	29.0836	29.3644	25.6952	24.8614	26.1893	3.7619	2.58202	5	5	5	28.4	28.4	28.4	158.53	632050000	794250000	876520000	8159400	5030700	14691000	501700000	376520000	581730000	47635000	21698000	45243000	38	FAMLGAAGAIAPEILGK;GLAGSGNPAYPGGPFFNPLGFGK;GLAGSGNPAYPGGPFFNPLGFGKDEK;QYFLGLEK;WLAYGEIINGR
AT5G20490	AT5G20490.1;AT5G20490.2;AT5G20490.3	(XIK)	MYOSIN XI-17 (XI-17); (XI-K);MYOSIN XI K (ATXIK); (XIK)	Encodes a member of the type XI myosin protein family involved in root hair growth, trichome development, and organelle trafficking. Required for fast root hair growth. This gene appears to be expressed at low levels throughout the plant.		26.7332	26.4145	26.573	22.5514	23.8221	22.0754	3.75731	2.08719	7	7	7	6.5	6.5	6.5	46.182	87632000	124880000	126610000	923130	2447700	0	46509000	36137000	49888000	13667000	8700000	0	22	AGQMAELDAR;INSLTSEVEALK;LDGVDDTEEYLATR;LQVEEANAAVIR;SNSILVSGESGAGK;VCQISDPER;VGPVNIIVGSHVWIEDPGAAWIDGEVVK
AT5G12250	AT5G12250.1	BETA-6 TUBULIN (TUB6)	BETA-6 TUBULIN (TUB6)	Encodes a beta-tubulin. Expression of TUB6 has been shown to decrease in response to cold treatment.		27.1921	26.5963	26.8089	22.7173	23.9435	22.6775	3.753	2.56532	14	3	3	42.8	11.8	11.8	27.294	120450000	141650000	149100000	0	0	0	125410000	79752000	82833000	0	0	0	12	EILHIQGGQCGNQIGSK;FPGQLNSDLR;FPGQLNSDLRK;FWEVVCDEHGIDPTGR;GHYTEGAELIDAVLDVVR;IREEYPDR;KLAVNLIPFPR;LAVNLIPFPR;NSSYFVEWIPNNVK;TGPYGQIFRPDNFVFGQSGAGNNWAK;VNVYYNEASCGR;VSDTVVEPYNATLSVHQLVENADECMVLDNEALYDICFR;VSEQFTAMFR;YVGNSDLQLER
AT1G61790	AT1G61790.2;AT1G61790.1	OLIGOSACCHARYLTRANSFERASE SUBUNIT 3/6 (OST3/6)	OLIGOSACCHARYLTRANSFERASE SUBUNIT 3/6 (OST3/6);ATU (ARTUMES)	Encodes the OST3/6 subunit of the hetero-oligomeric plant oligosaccharyltransferase complex (OST). Also identified by GWAS as having a role in interspecific pollen tube recognition.		19.6589	21.8397	20.9358	25.9054	26.1023	25.2377	-4.93701	2.39398	2	2	2	6.4	6.4	6.4	2.4243	0	0	0	9438800	11890000	7595900	0	0	0	28093000	47851000	23589000	2	LAESMAEFVEQR;LFFCEIEFSK
AT1G62020	AT1G62020.1	ALPHA1 COAT PROTEIN (alpha1-COP)	ALPHA1 COAT PROTEIN (alpha1-COP)	Member of the Coat Protein I (COPI) complex is a seven-subunit coatomer complex consisting of the &#945;, &#946;, &#946;&#8242;, &#947;, &#948;, &#949;, and &#950; proteins. COPI is required for retrograde transport from the Golgi to the endoplasmic reticulum, Golgi maintenance, and cell plate formation. Required for the acceptance of compatible pollen.		28.4454	28.6494	28.2714	29.2295	30.2872	30.2128	-1.45444	1.69548	22	22	10	22.1	22.1	11.3	153.94	287150000	587820000	410900000	94536000	216250000	238910000	68073000	93179000	67551000	119530000	170590000	144330000	107	AWEVDTLR;DSQVIPIR;ERPAFALSGDSLFYAK;FDEHEGPVR;GFPEVALHFVEDER;GVHFHNSQPLFVSGGDDYK;GWSESSSPNVR;ILENAGHLPLAYITASVHGLNDIAER;IWNWQSR;KSPLPIPTDAIFYAGTGNLLCR;LATELGDNVPSLPEGK;LLETSPVDSQAK;LVLGELQTPFVR;NPFVVCGSTYVPIYR;RLLETSPVDSQAK;SPLPIPTDAIFYAGTGNLLCR;SPPALVYDFSQLDEK;STSQVLVK;TLDVPIYITK;TVQFHHEYPWIVSASDDQTIR;TVSPADDIMR;VVIFDLQQR
AT3G14600	AT3G14600.1	RIBOSOMAL PROTEIN EL20X (EL20X)	RIBOSOMAL PROTEIN EL20X (EL20X)	Ribosomal protein L18ae/LX family protein;(source:Araport11)		27.9816	27.046	27.7987	23.8137	23.9745	23.8471	3.73037	2.61845	4	2	2	22.5	10.1	10.1	8.5553	208200000	193460000	296100000	2214400	2720400	2897100	131720000	63733000	119260000	11665000	12272000	10618000	23	ALPTENDEHPK;FPCIQIIK;NYGIWLR;SNGQMLAINEIFEK
AT1G62480	AT1G62480.1	0	0	Vacuolar calcium-binding protein-like protein;(source:Araport11)		25.3779	24.8903	22.7171	27.6053	27.8325	28.2221	-3.55822	1.66347	3	3	3	55.3	55.3	55.3	52.633	0	43416000	8744000	30665000	39448000	60112000	0	23602000	12620000	79336000	57752000	122190000	9	AVESEEVTTVSESLPAPVTESQAPVEVTTK;DLVVEETEKPIEETEEAQVETPEVVEIK;KDEEAPVETPVVVEDESKTEEVVEAK
AT1G62660	AT1G62660.4;AT1G62660.3;AT1G62660.2;AT1G62660.1	VACUOLAR INVERTASE 1 (VI1)	VACUOLAR INVERTASE 1 (VI1)	Glycosyl hydrolases family 32 protein;(source:Araport11)		22.9564	24.5124	23.8939	24.5354	24.4742	25.2765	-0.974502	1.11671	2	2	2	7.5	7.5	7.5	16.917	6393500	33410000	19768000	3652000	3846400	7803000	11380000	21657000	14995000	23143000	18886000	23920000	3	ILVDHSIVEGFAQGGR;STLANDVVKPIYGSFVPVLK
AT1G63940	AT1G63940.1;AT1G63940.2;AT1G63940.4;AT1G63940.3	MONODEHYDROASCORBATE REDUCTASE 6 (MDAR6)	MONODEHYDROASCORBATE REDUCTASE 6 (MDAR6)	Monodehydroascorbate reductase 6		25.1364	25.4906	24.7939	26.7455	26.8814	26.7487	-1.6516	2.24113	7	7	7	25.5	25.5	25.5	21.387	28972000	65818000	36889000	16898000	20403000	21649000	15306000	23254000	19387000	39185000	50043000	23441000	12	EFVIVGGGNAAGYAAR;GASINNLEAGSDGR;GIEVIYEDPVAGADFEK;GVLVESGSPEEFQLLPK;KVWWQFFGDNVGETVEVGNFDPK;LADGSTIEADTVVIGIGAK;TSTPGIFAIGDVAAFPLK
AT5G59090	AT5G59090.2;AT5G59090.3;AT5G59090.1	SUBTILASE 4.12 (SBT4.12)	SUBTILASE 4.12 (SBT4.12);SUBTILASE 4.12 (ATSBT4.12)	subtilase 4.12;(source:Araport11)		23.7454	23.5707	23.8324	20.5976	19.2821	20.213	3.68523	2.34726	2	2	2	7	7	7	3.5986	11047000	17394000	18943000	238300	105220	0	10049000	12879000	10303000	6260300	3865900	0	3	DTSGHGTHTASTAAGNAVK;QSFSVTVTGSDVDSEVPSSANLIWSDGTHNVR
AT1G64790	AT1G64790.1;AT1G64790.3;AT1G64790.2	ILITHYIA (ILA)	GENERAL CONTROL NON-DEREPRESSIBLE 1 (GCN1);NON-RESPONDING TO OXYLIPINS 7 (NOXY7);ILITHYIA (ILA)	ILITHYIA (ILA) is a HEAT repeat protein involved in plant immunity. The gene is also involved in systemic acquired resistance induced by P. syringae expressing avrRps4. Loss-of-function mutants of ILA caused pleiotropic defects in the mutant plants. The mutant plants are smaller in size and the leaves are serrated and yellow to light green in color. Required for bacterium-triggered stomatal closu…		22.619	24.4127	24.2049	26.8487	26.822	25.4443	-2.62616	1.911	7	7	7	4.6	4.6	4.6	30.036	5060300	31180000	24524000	18151000	19581000	8765400	14228000	12006000	11330000	38019000	46873000	20400000	16	LLEVLNTPSESVQR;QSSVELLGDLLFK;SGPLPVDTFTFIFPILER;VVIDVLSSIVSALHDDSSEVR;VVLVIDEEGVETLLSELLK;YGHDLGTDYSGIFK;YLQLVLPAILDGLADENESVR
AT1G65930	AT1G65930.1	CYTOSOLIC NADP+-DEPENDENT ISOCITRATE DEHYDROGENASE (cICDH)	CYTOSOLIC NADP+-DEPENDENT ISOCITRATE DEHYDROGENASE (cICDH)	Encodes a NADP+-isocitrate dehydrogenase that is believed to function in the cytosol. It appears to contribute to NADPH production under oxidative stress, and thereby to participate in redox signalling linked to defense responses. The mRNA is cell-to-cell mobile.		26.5334	27.6601	26.9524	29.2057	29.0228	29.1929	-2.09183	1.97783	12	12	12	36.8	36.8	36.8	49.512	76303000	296100000	164690000	92984000	90020000	117820000	29944000	57965000	33900000	109480000	125050000	99910000	59	AFADASMNTAYEK;CATITPDEGR;DATDDKVTIESAEATKK;DTYLNTEEFIDAVAAELK;FKDIFQEVYEASWK;HAFGDQYR;LITPFVELDIK;SEGGYVWACK;SKYDAAGIWYEHR;TIEAEAAHGTVTR;VANPIVEMDGDEMTR;YFDLGLPHR
AT1G65960	AT1G65960.4;AT1G65960.3;AT1G65960.1;AT1G65960.2;AT3G17720.1;AT3G17760.2;AT3G17760.1;AT5G17330.1	GLUTAMATE DECARBOXYLASE 2 (GAD2)	GLUTAMATE DECARBOXYLASE 2 (GAD2)	glutamate decarboxylase (GAD2) The mRNA is cell-to-cell mobile.		17.8057	21.3663	21.5566	22.1348	23.6603	25.3626	-3.47632	1.3426	2	1	1	11.2	9.3	9.3	5.3512	0	0	0	0	0	0	0	0	0	0	0	0	2	KNEETGWNTPIHVDAASGGFIAPFIYPELEWDFR;YFEVELK
AT1G66200	AT1G66200.3;AT1G66200.1;AT1G66200.2	GLUTAMINE SYNTHASE CLONE F11 (GSR2)	GLUTAMINE SYNTHETASE 1;2 (GLN1;2);GLUTAMINE SYNTHASE CLONE F11 (GSR2)	encodes a cytosolic glutamate synthetase, this enzyme has low affinity with substrate ammonium		25.3373	25.4919	25.2689	27.6142	27.039	27.8607	-2.13864	2.35239	6	4	2	20.5	16.7	12.9	52.617	33301000	65881000	51271000	30856000	22759000	46794000	36787000	38700000	34622000	132410000	81774000	119600000	18	EHISAYGEGNER;HAAAEIFANPDVIAEVPWYGIEQEYTLLQK;HKEHISAYGEGNER;SLLADLVNLDISDNSEK;TLPGPVTDPSK;TLPGPVTDPSKLPK
AT4G22890	AT4G22890.2;AT4G22890.4;AT4G22890.5;AT4G22890.3;AT4G22890.1	PGR5-LIKE A (PGRL1A)	PGR5-LIKE A (PGRL1A)	Encodes PGRL1A, a transmembrane protein present in thylakoids. PGRL1A has a highly homologous isoform PGRL1B encoded by At4g11960. Plants lacking PGRL1 show perturbation of cyclic electron flow, similar to PGR5-deficient plants. PGRL1 and PGR5 interact physically and associate with PSI (photosystem I). The mRNA is cell-to-cell mobile.		25.2129	24.9628	25.8392	19.3253	23.9423	21.6974	3.6833	1.28084	3	3	3	12.6	12.6	12.6	30.945	30551000	45653000	76132000	0	0	0	27786000	38293000	27225000	0	0	0	7	FLEASMAYVSGNPILNDEEYDKLK;IDGSDIVSEGPR;LKIDGSDIVSEGPR
AT1G66280	AT1G66280.1	(BGLU22)	(BGLU22)	Glycosyl hydrolase superfamily protein;(source:Araport11)		22.6768	25.0972	21.8158	28.2196	28.9447	29.8425	-5.80568	2.14152	3	1	1	5.3	2.1	2.1	8.5959	5267200	50112000	4681500	46943000	85274000	184830000	9674400	38337000	6233200	70653000	356830000	476790000	11	FYHDLIDELLK;NLNTDAFR;YKEDIQLMK
AT5G37780	AT5G37780.1;AT1G66410.1;AT1G66410.2;AT5G37780.2;AT5G37780.3;AT5G37780.4;AT3G43810.4;AT3G43810.3;AT1G66410.4;AT1G66410.3	CALMODULIN 1 (CAM1)	TOUCH 1 (TCH1);CALMODULIN 1 (CAM1); (ACAM-1)	encodes a calmodulin that is involved in thigmomorphogenesis. Gene expression is rapidly induced upon a variety of abiotic stimuli, including water spray, subirrigation, wind, touch, wounding, or darkness.		29.8092	29.5199	29.739	28.7904	29.0093	28.5525	0.905305	2.45314	8	8	2	57	57	20.1	323.31	738990000	1074700000	1136400000	69726000	89181000	75583000	309080000	262680000	307190000	178870000	192980000	146710000	77	ADQLTDEQISEFK;ADQLTDEQISEFKEAFSLFDKDGDGCITTK;DTDSEEELKEAFR;EADVDGDGQINYEEFVK;EAFSLFDKDGDGCITTK;ELGTVMR;MKDTDSEEELKEAFR;VFDKDQNGFISAAELR
AT1G14380	AT1G14380.4;AT1G14380.3;AT1G14380.1;AT1G14380.6;AT1G14380.5;AT1G14380.2;AT1G14380.7	IQ-DOMAIN 28 (IQD28)	IQ-DOMAIN 28 (IQD28)	Encodes a microtubule-associated protein.Member of IQ67 (CaM binding) domain containing family.		27.6717	26.9377	27.281	23.8584	23.9584	23.0532	3.67351	3.42357	7	7	7	14.6	14.6	14.6	24.781	167960000	179470000	206820000	0	2690300	1671000	64991000	55884000	62116000	0	9660300	9812300	22	ALLPANIDKQDDGLTLSGR;IQYGPEEPNSAK;NDLGEVELEQAAIK;NYQAVVEAEK;SSDIAIQFQK;VLEGGDNIEFGEK;VSGNVLEGGEGENIVFTEK
AT1G67090	AT1G67090.1	RIBULOSE BISPHOSPHATE CARBOXYLASE SMALL CHAIN 1A (RBCS1A)	RIBULOSE BISPHOSPHATE CARBOXYLASE SMALL CHAIN 1A (RBCS1A)	Encodes a member of the Rubisco small subunit (RBCS) multigene family: RBCS1A (At1g67090), RBCS1B (At5g38430), RBCS2B (At5g38420), and RBCS3B (At5g38410). Functions to yield sufficient Rubisco content for leaf photosynthetic capacity.		29.5101	30.3579	29.9663	32.4365	32.6914	31.4957	-2.26308	2.32314	11	6	6	56.7	30.6	30.6	242.19	600620000	1921199999.9999998	1330300000	872940000	1144700000	581320000	208970000	454740000	311570000	1514699999.9999998	1689099999.9999998	835900000	167	EHGNSPGYYDGR;FETLSYLPDLTDSELAK;IIGFDNTR;KFETLSYLPDLTDSELAK;KFETLSYLPDLTDSELAKEVDYLIR;KKFETLSYLPDLTDSELAK;LPLFGCTDSAQVLK;LPLFGCTDSAQVLKEVEECKK;NKWIPCVEFELEHGFVYR;QVQCISFIAYKPPSFTG;WIPCVEFELEHGFVYR
AT1G67280	AT1G67280.2;AT1G67280.1	GLYOXALASEI 6 (ATGLYI6)	GLYOXALASEI 6 (ATGLYI6)	Encodes a Ni+ dependent glyoxylase.		19.3947	21.1369	22.3547	23.8846	23.2632	19.9066	-1.3894	0.684089	2	1	1	13.4	7.3	7.3	7.1454	0	0	6801600	0	0	0	0	0	6586500	0	0	0	1	GNAYAQIAIGTDDVYK;TVIAFIEDPDGYKFELLER
AT5G28060	AT5G28060.1	(RPS24B)	RIBOSOMAL PROTEIN ES24Y (ES24Y); (RPS24B)	Ribosomal protein S24e family protein;(source:Araport11)		26.2446	25.5533	25.6936	24.6765	22.079	19.7362	3.66657	1.21844	4	2	2	27.1	18	18	15.794	62457000	68744000	68822000	0	0	0	118760000	80250000	83392000	0	0	0	15	DPNAIFCFK;KQFVIDVLHPGR;QFVIDVLHPGR;SSGYGLIYDTVENAK
AT1G67730	AT1G67730.1	BETA-KETOACYL REDUCTASE 1 (KCR1)	(ATKCR1);BETA-KETOACYL REDUCTASE 1 (KCR1); (YBR159)	Encodes one of the two Arabidopsis homologues to YBR159w encoding a S. cerevisiae beta-ketoacyl reductase (KCR), which catalyzes the first reduction during VLCFA (very long chain fatty acids, >18 carbon) elongation: KCR1 (At1g67730), KCR2 (At1g24470). Complementation of the yeast ybr159Delta mutant demonstrated that the two KCR proteins are divergent and that only AtKCR1 can restore heterologous …		25.5271	25.4066	25.4955	25.1797	24.4608	25.224	0.521524	1.0783	2	2	2	9.7	9.7	9.7	14.126	37983000	62096000	59991000	5707800	3811000	7524100	32861000	32340000	32975000	19385000	28970000	18896000	11	YFHEVDEELINNLIK;YGSWAIITGPTDGIGK
AT1G68010	AT1G68010.3;AT1G68010.1;AT1G68010.2	HYDROXYPYRUVATE REDUCTASE (HPR)	HYDROXYPYRUVATE REDUCTASE (HPR)	Encodes hydroxypyruvate reductase.		25.3254	25.7949	25.4372	26.4848	26.4253	26.9988	-1.1171	2.31401	7	7	7	25.3	25.3	25.3	27.401	33028000	81278000	57617000	14104000	14873000	25746000	19836000	32632000	21035000	49636000	26559000	68869000	13	ASSMEEVLR;EADLISLHPVLDK;GPVIDEAALVEHLK;GQTVGVIGAGR;IVEADEFMR;TILSVEDIIDLIGDK;VGLDVFEEEPFMKPGLADTK
AT1G68560	AT1G68560.1	ALPHA-XYLOSIDASE 1 (XYL1)	ALPHA-XYLOSIDASE 1 (ATXYL1);ALPHA-XYLOSIDASE 1 (XYL1);THERMOINHIBITION RESISTANT GERMINATION 1 (TRG1); (TRG1);ALTERED XYLOGLUCAN 3 (AXY3); (GH31)	Encodes a bifunctional alpha-l-arabinofuranosidase/beta-d-xylosidase that belongs to family 3 of glycoside hydrolases.		23.2056	24.4964	24.6264	23.97	23.9051	24.1089	0.114769	0.384776	2	2	2	4.4	4.4	4.4	3.48	7598900	33042000	0	2467900	2592700	3473500	15386000	11267000	0	15971000	15213000	15680000	5	IYGSDITTLR;VTLPAPLNFVNVHLYQNTILPTQQGGLISK
ATCG01300	ATCG01300.1;ATCG00840.1	RIBOSOMAL PROTEIN L23 (RPL23.2)	RIBOSOMAL PROTEIN L23 (RPL23.2);RIBOSOMAL PROTEIN UL23CY (UL23CY)	One of two chloroplast genes that encode chloroplast ribosomal protein L23, a constituent of the large subunit of the ribosomal complex		27.794	27.8041	28.1636	24.2601	24.3319	24.229	3.6469	3.52088	3	3	3	24.7	24.7	24.7	74.111	182810000	327180000	381320000	3017500	3485200	3775100	155900000	121340000	178580000	21670000	19477000	19574000	65	MIITLQPGYSIPPLR;MIITLQPGYSIPPLRK;YAVFTDK
AT5G26742	AT5G26742.2;AT5G26742.1;AT5G26742.3	EMBRYO DEFECTIVE 1138 (emb1138)	(RH3); (ATRH3);EMBRYO DEFECTIVE 1138 (emb1138)	DEAD box RNA helicase (RH3);(source:Araport11)		29.0148	28.2793	28.6875	25.8204	25.1762	24.0562	3.64291	2.28323	14	14	14	33.7	33.7	33.7	189.91	426090000	454820000	548240000	0	6257300	3349000	93122000	63068000	80861000	0	7800300	3310900	70	DADEVSLALSNSIATEALHGDISQHQR;DVGCHFEFISPPTVGDLLESSADQVVATLNGVHPDSIK;GLDIPNVDLVIHYELPNDPETFVHR;GSSDDWLIGGR;GTDALAAALAHLSGFSQPPSSR;IFLIADDR;IIDLIEGR;IQGAVFDLPEEIAK;LPPLQDDGPSSDNYGR;LTEEAGDYTAFR;SLGLSDHDEYDLDGDNNNVEADDGEELAISK;SVTGFLSDLYR;TILSDLITVYAK;YLDNPLNIDLVGDQDEK
AT1G69740	AT1G69740.3;AT1G69740.2;AT1G69740.1	(HEMB1)	5-AMINOLEVULINIC ACID DEHYDRATASE 1 (ALAD1); (HEMB1)	Encodes a putative 5-aminolevulinate dehydratase involved in chlorophyll biosynthesis.		23.3357	24.9307	24.326	22.395	23.1513	24.6888	0.785765	0.700824	4	4	4	17.7	17.7	17.7	16.419	8316200	44649000	26671000	0	0	5192200	8502500	12124000	10120000	0	0	15021000	7	DKYPDLIIYTDVALDPYSSDGHDGIVR;EDEAEGADILLVKPGLPYLDIIR;NSTGDEAYNDNGLVPR;YASSFYGPFR
AT1G70410	AT1G70410.3;AT1G70410.1;AT1G70410.2	BETA CARBONIC ANHYDRASE 4 (BCA4)	BETA CARBONIC ANHYDRASE 4 (ATBCA4);BETA CARBONIC ANHYDRASE 4 (BCA4)	Encodes a putative beta-carbonic anhydrase betaCA4. Together with betaCA1 (At3g01500) regulates CO2-controlled stomatal movements in guard cells, as well as attenuates immunity. Differential CA gene expression in response to changing atmospheric CO2 conditions contribute to altered disease resistance levels.		26.0355	25.5705	25.2894	26.1308	25.891	26.1631	-0.429855	1.05297	4	4	4	19.8	19.8	19.8	16.216	54031000	69566000	52005000	11035000	10270000	14426000	25491000	25554000	19913000	48299000	32960000	41966000	8	ATESYEAAIK;ELDSSNSDAIER;GTFDLWELDFK;VCPSHILNFQPGEAFVVR
AT1G70730	AT1G70730.1;AT1G70730.3;AT1G70730.2	PHOSPHOGLUCOMUTASE 2 (PGM2)	PHOSPHOGLUCOMUTASE 2 (PGM2)	Encodes a cytosolic phosphoglucomutase (PGM). Two Arabidopsis PGM proteins (AT1G70730/PGM2 and AT1G23190/PGM3) have high sequence similarities and redundant functions. Mature plants possessing a single cPGM allele had a major reduction in cPGM activity. Whereas pgm2 and pgm3 single mutants are undistinguishable from the wild type, loss of both PGM2 and PGM3 severely impairs male and female gameto…		24.7636	25.7589	24.252	24.5668	24.8577	25.2446	0.0351512	0.324659	9	4	4	22.1	10.4	10.4	18.189	22375000	79272000	25338000	3732200	5017600	7632300	21358000	21814000	9033800	21408000	14437000	26799000	7	ATGAFILTASHNPGGPTEDFGIK;EDFGGGHPDPNLTYAK;FDVEVFDSADDYVK;FFEVPTGWK;LQSSLPEVNK;LSGTGSEGATIR;VDISTIGITSFEGPEGK;VSLVSTSPIDGQKPGTSGLR;YLFEDGSR
AT5G07350	AT5G07350.1;AT5G07350.2	TUDOR-SN PROTEIN 1 (TUDOR1)	TUDOR-SN PROTEIN 1 (TUDOR1);ARABIDOPSIS THALIANA TUDOR-SN PROTEIN 1 (AtTUDOR1);TUDOR-SN PROTEIN 1 (TSN1)	RNA binding protein with nuclease activity essential for stress response. Involved in mechanisms acting on mRNAs entering the secretory pathway. Functionally redundant with TSN2.		25.4792	25.1076	25.3415	24.4223	20.1937	20.442	3.62342	1.23187	5	3	3	8.6	6.3	6.3	9.4561	36743000	50473000	53919000	0	0	0	30110000	28112000	33219000	0	0	0	7	ADSDEVTAPPAAAIAGSQPVGVNIAELVLVR;ATGAENQWLK;DLGLELVENGLAK;LAASAASSVEVSSDPFATEAK;REEKPAPYAR
AT1G70850	AT1G70850.1;AT1G70850.3;AT1G70850.2	MLP-LIKE PROTEIN 34 (MLP34)	MLP-LIKE PROTEIN 34 (MLP34)	MLP-like protein 34;(source:Araport11)		25.5864	26.1889	26.0832	27.686	27.4312	28.3308	-1.86318	2.48601	6	6	4	35.8	35.8	27.5	45.468	39577000	106800000	90158000	32429000	29868000	64819000	36848000	45718000	39706000	162040000	121210000	195460000	26	ASPGNIQSCDLHEGDWGTVGSIVFWNYVHDGEAK;EIDEHLLAEE;HGGSGSVVHWHFEYEK;INEEVAHPETLLQFAVEVSK;TEAPSLVGKLETEVEIK;VIEGDLMK
AT1G70890	AT1G70890.1	MLP-LIKE PROTEIN 43 (MLP43)	MAJOR LATEX PROTEIN LIKE 43 (MLP43);MLP-LIKE PROTEIN 43 (MLP43)	MLP-like protein 43;(source:Araport11)		22.4211	24.6317	22.7228	25.1973	25.3246	26.117	-2.28775	1.49276	5	4	4	41.8	35.4	35.4	8.2368	4411700	36291000	8778800	5777800	6935400	13972000	10146000	16881000	6584500	19385000	19817000	28248000	6	ATPDKIHGCELHEGDWGK;EIDEHLLAEE;ISEEVAHPETLLQFCVEISK;NKIEAVDPEK;VGSIVIWK
AT1G71500	AT1G71500.1	PHOTOSYSTEM B PROTEIN 33 (PSB33)	LIGHT-HARVESTING-LIKE 8 (LIL8);PHOTOSYSTEM B PROTEIN 33 (PSB33)	Encodes PSB33, a protein conserved in the plastid lineage. PSB33 is associated with the chloroplast thylakoid membrane and provides stability to Photosystem II. The mRNA is cell-to-cell mobile.		29.0456	28.7383	28.8804	28.2623	28.7972	27.9969	0.535993	1.15995	7	7	7	33.4	33.4	33.4	195.69	435280000	625210000	626690000	48352000	76985000	51426000	151750000	150360000	154620000	75954000	103890000	53535000	69	AQPGLTATNVNVDEVR;LTQDGCIVCPSTDSTFDLR;MIVDEGSEGFGFTK;NDVFAIENR;SPAEGAYSEGLLNAR;TEAAAEIVFSGK;YDEENIYISIR
AT1G72150	AT1G72150.1	PATELLIN 1 (PATL1)	PATELLIN 1 (PATL1)	novel cell-plate-associated protein that is related in sequence to proteins involved in membrane trafficking in other eukaryotes The mRNA is cell-to-cell mobile.		25.2868	25.9882	25.6223	26.5131	27.385	27.5031	-1.50131	1.97464	6	6	5	13.6	13.6	11.9	36.289	32157000	92928000	65503000	14384000	28926000	36521000	45353000	31141000	40361000	78233000	90613000	85784000	20	AIDFSNPEAK;EGHVVIYSSYGEFQNK;IDELVESGEEVSEFEK;SVSVKEEETVVVAEK;TFGSIITSPR;VVVLTAEEVQK
AT1G72370	AT1G72370.2;AT1G72370.1	40S RIBOSOMAL PROTEIN SA (P40)	40S RIBOSOMAL PROTEIN SA (P40); (AP40);RIBOSOMAL PROTEIN US2Z (US2Z); (RPSAA); (RP40)	acidic protein associated to 40S ribosomal subunit of ribosomes. Involved in polysome formation during active protein synthesis. Expressed in actively growing tissue.		26.4125	26.3507	26.0701	26.6316	26.6418	27.0626	-0.500907	1.58644	6	6	6	31	31	31	71.867	70165000	119470000	89346000	15615000	17281000	26910000	32822000	35085000	27299000	55312000	55464000	88389000	23	EGALGNIPIIAFCDTDSPMR;FAQYTGANAIAGR;FVDIGIPANNK;HTPGTFTNQMQTSFSEPR;TDHQPIKEGALGNIPIIAFCDTDSPMR;VIVAIENPQDIIVQSARPYGQR
AT1G72750	AT1G72750.1	TRANSLOCASE INNER MEMBRANE SUBUNIT 23-2 (TIM23-2)	TRANSLOCASE INNER MEMBRANE SUBUNIT 23-2 (ATTIM23-2);TRANSLOCASE INNER MEMBRANE SUBUNIT 23-2 (TIM23-2)	translocase inner membrane subunit 23-2;(source:Araport11)		23.8913	23.8131	23.4602	21.8904	27.4791	24.3324	-0.845757	0.485688	2	2	2	12.8	12.8	12.8	2.8686	12223000	20577000	0	0	0	4055600	16690000	17387000	0	0	0	15957000	5	ILNSSGQTGR;LYNPYQNYEVPINK
AT1G73230	AT1G73230.1;AT1G17880.1	0	0	Nascent polypeptide-associated complex NAC;(source:Araport11)		24.3291	23.2619	23.3746	26.2837	25.9548	26.0104	-2.42779	2.18355	2	2	2	15.8	15.8	15.8	3.5239	16556000	14043000	13792000	12269000	10734000	0	20263000	12258000	12436000	67480000	27085000	0	4	LAEQFQK;VQASIAANTWVVSGTPQTK
AT1G73330	AT1G73330.1	DROUGHT-REPRESSED 4 (DR4)	DROUGHT-REPRESSED 4 (DR4);DROUGHT-REPRESSED 4 (ATDR4)	encodes a plant-specific protease inhibitor-like protein whose transcript level in root disappears in response to progressive drought stress. The decrease in transcript level is independent from abscisic acid level.		25.6929	25.2699	25.7578	29.5696	29.9875	29.1592	-3.99855	3.7107	3	3	3	23.9	23.9	23.9	48.391	42610000	56484000	71954000	119660000	175680000	115100000	59564000	47627000	62975000	509340000	681930000	328030000	16	EMNSITIEFEAPNWFLCPK;LALTSDEALLVK;SLIISTGGSSNPSGFQIHR
AT1G73600	AT1G73600.1;AT1G73600.2	(NMT3)	(NMT); (NMT3);PHOSPHOETHANOLAMINE METHYLTRANSFERASE3 (ATPMT3); (DEG26)	Encodes a S-adenosyl-L-methionine-dependent phosphoethanolamine N-methyltransferase whose expression is responsive to both phosphate (Pi) and phosphite (Phi) in roots. It catalyzes the three sequential P-base methylation of phosphoethanolamine to phosphocholine. Homologous biochemical function to NMT1 (At3g18000). Double mutants of NMT1 and NMT3 are defective in leaf, root, flower, seed, and poll…		22.4646	20.1363	19.2704	24.931	22.933	22.5012	-2.83129	1.37941	3	1	1	11.2	6.7	6.7	5.4928	0	0	0	0	0	0	0	0	0	0	0	0	2	ASDLDKEERPEILAFLPPIEGTTVLEFGAGIGR;DTILHIQDKPALFR;FLDNVQYK
AT3G18740	AT3G18740.1;AT1G36240.1	(RPL30C)	RECEPTOR-LIKE KINASE 902 (RLK902); (RPL30C);RIBOSOMAL PROTEIN EL30X (EL30X)	The gene encodes a putative leucine-rich repeat (LRR)Receptor-like kinase (RLK).		28.6234	28.4481	28.7178	23.8901	26.4897	24.5556	3.61798	1.67584	4	4	3	38.4	38.4	24.1	55.501	324840000	511280000	559910000	2334800	15552000	0	350320000	264300000	392400000	51385000	236560000	0	42	LILISSNCPPLR;LILISSNCPPLRR;VSCLSIVDPGDSDIIK;YNGNNVDLGTACGK
AT4G29410	AT4G29410.2;AT4G29410.1	RIBOSOMAL PROTEIN EL28Y (EL28Y)	RIBOSOMAL PROTEIN EL28Y (EL28Y)	Ribosomal L28e protein family;(source:Araport11)		29.5056	28.9873	29.0757	25.6717	25.748	25.309	3.61328	4.39508	4	4	3	32.2	32.2	23.1	58.734	598770000	742990000	717520000	8027500	9301000	7980900	641050000	414580000	255220000	51349000	51376000	37278000	26	ATVPGQLIWEIVK;DQGVVLGTTK;NNCFLVK;VVANQVVDNYYRPDLK
AT1G74310	AT1G74310.1;AT1G74310.2	HEAT SHOCK PROTEIN 101 (HSP101)	(HOT1);HEAT SHOCK PROTEIN 101 (ATHSP101);HEAT SHOCK PROTEIN 101 (HSP101)	Encodes ClpB1, which belongs to the Casein lytic proteinase/heat shock protein 100 (Clp/Hsp100) family. Involved in refolding of proteins which form aggregates under heat stress. Also known as AtHsp101. AtHsp101 is a cytosolic heat shock protein required for acclimation to high temperature.		30.5318	30.4981	30.5203	32.2361	32.5689	32.6599	-1.97156	2.69237	30	30	27	42.3	42.3	39.7	323.31	1219500000	2117199999.9999998	1952999999.9999998	759740000	1051499999.9999999	1302800000	222860000	263880000	229820000	598540000	705400000	720800000	316	AHVAVFNTLLQVLDDGR;AIDLVDEACANVR;ALAEQLFDDENLLVR;CIGATTLEEYR;DLVEQAGK;EEIDENSTVYIDAGAGDLVYR;FQQVYVAEPSVPDTISILR;GDTHLAVDQLIMGLLEDSQIR;GDVPNSLTDVR;KELDDLR;KELDDLRDK;KLPSQSPPPDDIPASSSLIK;KVESASGDTNFQALK;LDEIVVFDPLSHDQLR;LDPVIGRDEEIR;LIGAPPGYVGHEEGGQLTEAVR;LISLDMGALVAGAK;LPSQSPPPDDIPASSSLIK;NNPVLIGEPGVGK;RFQQVYVAEPSVPDTISILR;RPYCVILFDEVEK;TAVVEGLAQR;TKNNPVLIGEPGVGK;VESGGLVDASTGK;VESGGLVDASTGKK;VQLDSQ…
AT1G74470	AT1G74470.1	0	0	Encodes for a multifunctional protein with geranylgeranyl reductase activity shown to catalyze the reduction of prenylated geranylgeranyl-chlorophyll a to phytyl-chlorophyll a (chlorophyll a) and free geranylgeranyl pyrophosphate to phytyl pyrophosphate. The mRNA is cell-to-cell mobile.		23.4747	23.4584	23.2139	25.6295	26.164	25.8318	-2.49273	3.4701	2	2	2	9	9	9	17.791	9157200	16092000	12339000	7795900	12409000	11466000	13297000	14095000	11218000	0	0	0	7	VALVGDAAGYVTK;VAVIGGGPAGGAAAETLAQGGIETILIER
AT5G54110	AT5G54110.1	MEMBRANE-ASSOCIATED MANNITOL-INDUCED (MAMI)	MEMBRANE-ASSOCIATED MANNITOL-INDUCED (MAMI);MEMBRANE-ASSOCIATED MANNITOL-INDUCED (ATMAMI)	Encodes a highly polar protein with more than 60% hydrophilic amino acid residues that is associated with the plasma membrane. It has limited secondary structure similarity to VAP-33 from Aplysia, which may be involved in membrane trafficking. The mRNA is cell-to-cell mobile.		25.6915	25.449	26.0952	21.424	21.456	23.5778	3.5926	1.8189	3	3	3	14.7	14.7	14.7	10.599	42570000	63949000	90910000	0	0	2403800	24339000	24991000	35026000	0	0	10201000	13	QLDEAEAAVEAR;VIFIDADRPSAALEK;VVGEGLVIDEWK
AT1G74970	AT1G74970.1	RIBOSOMAL PROTEIN S9 (RPS9)	RIBOSOMAL PROTEIN S9 (RPS9); (TWN3); (SOT8); (PRPS9);RIBOSOMAL PROTEIN US9C (US9C)	Ribosomal protein S9, nuclear encoded component of the chloroplast ribosome		25.4962	24.5818	24.8447	24.8741	24.944	25.356	-0.0838105	0.395687	2	2	2	12.5	12.5	12.5	39.476	37179000	35057000	38212000	4618300	5327200	8244900	27595000	33248000	37616000	30109000	30017000	36830000	15	LPGGFAAQK;VPLVTLGYENSYDIFVK
AT1G75280	AT1G75280.1;AT1G75300.1	0	0	isoflavone reductase, putative, identical to SP:P52577 Isoflavone reductase homolog P3 (EC 1.3.1.-) {Arabidopsis thaliana}; contains Pfam profile PF02716: isoflavone reductase. Involved in response to oxidative stress. The mRNA is cell-to-cell mobile.		22.741	22.9639	22.0338	24.2064	24.431	24.6256	-1.84144	2.22108	2	2	2	10	10	10	9.3746	5506900	11422000	0	2907300	3733100	4969500	9080100	1804200	0	22722000	25197000	26601000	6	DLGVTILHGDLNDHESLVK;ILVIGGTGYIGK
AT1G75350	AT1G75350.1	EMBRYO DEFECTIVE 2184 (emb2184)	EMBRYO DEFECTIVE 2184 (emb2184);RIBOSOMAL PROTEIN BL31C (BL31C)	Ribosomal protein L31;(source:Araport11)		21.0761	22.3566	20.0343	26.8685	26.7799	25.16	-5.1138	2.62983	2	2	2	17.4	17.4	17.4	4.0124	0	0	0	18401000	0	7197700	0	0	0	83570000	0	15114000	3	ELHPEFHEDAK;FAGLSEIMEIPVLK
AT3G03920	AT3G03920.1	0	0	H/ACA ribonucleoprotein complex, subunit Gar1/Naf1 protein;(source:Araport11)		27.2869	27.0171	27.298	23.9884	23.8476	23.0805	3.56185	2.78854	5	5	5	40.1	40.1	40.1	29.46	128630000	189620000	209270000	0	0	0	105340000	62999000	80423000	0	0	0	11	FFIDPYK;FGGFRDEGPPSEVVEVATFVHACEGDAVTK;IPHFNAPIYLENK;MMEGIVATSYSPGDK;VDEIFGPINESLFSIK
AT1G75950	AT1G75950.1;AT5G42190.1	S PHASE KINASE-ASSOCIATED PROTEIN 1 (SKP1)	S PHASE KINASE-ASSOCIATED PROTEIN 1 (SKP1);ARABIDOPSIS SKP1 HOMOLOGUE 1 (ASK1);UFO INTERACTING PROTEIN 1 (UIP1); (SKP1A); (ATSKP1)	SKP1 is core component of the SCF family of E3 ubiquitin ligases and serves to tether the rest of the complex to an F-box protein, which provides specificity in binding to ubiquitin ligase substrate proteins. Predominately expressed from leptotene to pachytene. Negatively regulates recombination. Interacts with P0, a silencing suppressor protein encoded by poleroviruses by means of a conserved mi…		25.4814	26.1978	25.7692	25.8967	26.1073	26.6147	-0.390126	0.88527	2	2	2	17.5	17.5	17.5	17.584	36799000	107460000	72523000	9382600	11931000	19728000	53195000	57696000	65637000	40354000	39272000	57177000	11	AEAVEGAATSDDDLK;NDFTPEEEEEVRR
AT1G76010	AT1G76010.2;AT1G76010.1	(ALBA1)	(ATALBA1); (ALBA5); (ALBA4); (ALBA1)	Together with other ALBA proteins phase separates into stress granules and processing bodies under heat stress and directly binds to and recruits mRNAs to protect from degradation. Confers thermotolerance through stabilizing HSF messenger RNAs in cytoplasmic granules.		26.2132	25.8855	26.0444	26.5195	26.1534	25.8441	-0.124601	0.517599	3	3	3	8	8	8	7.6783	61114000	86543000	87765000	14447000	12318000	11564000	71837000	60291000	54066000	61551000	57832000	107060000	8	ADTPIDANEIR;GSTEVVFK;TVTIVELIK
AT1G76180	AT1G76180.2;AT1G76180.1	EARLY RESPONSE TO DEHYDRATION 14 (ERD14)	EARLY RESPONSE TO DEHYDRATION 14 (ERD14)	Encodes a dehydrin protein whose expression is induced early on in response to dehydration stress. This gene's expression to cold occurs in two waves, with early induction occurring within 1 h and secondary induction occurring 5 h after the beginning of cold stress. Expression is also induced in response to ABA but not in response to 2,4-D, BA, and GA3. ERD14 protein is capable of binding Ca2+, e…		24.6649	26.004	24.488	27.5607	27.3261	28.2076	-2.64585	2.11248	5	5	5	31.4	31.4	31.4	70.081	20896000	93949000	29840000	29733000	27769000	59512000	14557000	23097000	13390000	74383000	50894000	91814000	31	HESLLEK;KPEDGSAVAAAPVVVPPPVEEAHPVEK;VATEESSAEVTDR;VHISEPEPEVK;VHISEPEPEVKHESLLEK
AT3G08590	AT3G08590.2;AT3G08590.1	2,3-BIPHOSPHOGLYCERATE-INDEPENDENT PHOSPHOGLYCERATE MUTASE 2 (iPGAM2)	2,3-BIPHOSPHOGLYCERATE-INDEPENDENT PHOSPHOGLYCERATE MUTASE 2 (iPGAM2)	Encodes a 2,3-biphosphoglycerate-independent phosphoglycerate mutase that is involved in pollen development and stomatal movement.		24.238	24.094	24.6557	22.1978	19.5394	20.573	3.55912	1.71118	5	5	4	15.7	15.7	13.2	15.689	15543000	25000000	33518000	0	0	0	12337000	12121000	20656000	0	0	0	10	DVLDGSSVGFVETLEADLAALR;GTVHLIGLLSDGGVHSR;RGWDAQVLGEAPHK;TILDAIEQVGGIYVVTADHGNAEDMVK;VHILTDGRDVLDGSSVGFVETLEADLAALR
AT1G77180	AT1G77180.3;AT1G77180.2;AT1G77180.1	SNW/SKI-INTERACTING PROTEIN (SKIP)	(SUD3);SNW/SKI-INTERACTING PROTEIN (SKIP)	Encodes a putative transcriptional factor. Shows transcriptional activator activity in yeast. Involved in response to abscisic acid, salt and osmotic stress. SKIP lengthens period of the circadian clock by impairing the alternative splicing of PRR7 and PRR9. SKIP regulates the splicing of SEF pre-mRNA and suppresses flowering by activation of FLC.		23.8591	24.6012	23.8505	25.3258	21.5845	23.0856	0.771593	0.557102	2	2	2	7.8	7.8	7.8	2.6139	11953000	35532000	19182000	0	0	0	17577000	16032000	16299000	0	0	0	3	GLQDVQINDNFAK;NEGDLGTVVDEEEELQKEIQETAEETK
AT1G77510	AT1G77510.1	PDI-LIKE 1-2 (PDIL1-2)	PROTEIN DISULFIDE ISOMERASE 6 (ATPDI6);PDI-LIKE 1-2 (PDIL1-2);PROTEIN DISULFIDE ISOMERASE 6 (PDI6);PDI-LIKE 1-2 (ATPDIL1-2)	Encodes a protein disulfide isomerase-like (PDIL) protein, a member of a multigene family within the thioredoxin (TRX) superfamily. Transcript levels for this gene are up-regulated in response to three different chemical inducers of ER stress (dithiothreitol, beta-mercaptoethanol, and tunicamycin). AtIRE1-2 does not appear to be required for this response, but the atbzip60 mutant has a diminished…		21.6659	19.7375	22.0255	26.2024	25.6874	26.6518	-5.0376	2.26527	3	2	2	7.5	4.9	4.9	4.4403	0	0	0	11597000	8918400	20243000	0	0	0	48300000	45948000	55697000	6	SADSATEVVGEK;SASGNVVVYEGDR;VVVAESLDDIVFK
AT1G77590	AT1G77590.1;AT1G77590.2	LONG CHAIN ACYL-COA SYNTHETASE 9 (LACS9)	LONG CHAIN ACYL-COA SYNTHETASE 9 (LACS9)	Encodes major plastidic long chain acyl-CoA synthetase with a slight substrate preference of oleic acid over any of the other fatty acids.		24.3236	23.3966	24.2643	23.8642	23.2373	24.1907	0.230767	0.520261	2	2	2	4.3	4.3	4.3	5.5557	16493000	15417000	25554000	2293300	0	3676100	12626000	16357000	10209000	13276000	0	15797000	5	GVVVDVGGEPGYAIR;YLLSGGAPLSGDTQR
AT1G56110	AT1G56110.1	HOMOLOG OF NUCLEOLAR PROTEIN NOP56 (NOP56)	HOMOLOG OF NUCLEOLAR PROTEIN NOP56 (NOP56)	NOP56-like protein		27.2724	26.8041	27.0755	23.7205	23.4895	23.2899	3.5507	4.64652	5	5	5	12.3	12.3	12.3	24.399	127350000	163590000	179360000	2075900	0	1969000	83160000	55087000	69243000	5005000	0	3621500	24	EVIENLKQEEEGKEPVDASVK;FSLGLAEPK;IDCFADGATTAFGEK;IVNDNYLYAR;SFLELNLPK
AT1G78240	AT1G78240.2;AT1G78240.1	TUMOROUS SHOOT DEVELOPMENT 2 (TSD2)	TUMOROUS SHOOT DEVELOPMENT 2 (TSD2);QUASIMODO2 (QUA2); (OSU1);THINGS FALL APART2 (TFA2)	Encodes TSD2 (TUMOROUS SHOOT DEVELOPMENT2), a putative methyltransferase with an essential role in cell adhesion, anthocyanin accumulation, and coordinated plant development.		22.1076	23.7796	22.9919	26.3429	26.5565	25.2452	-3.08849	2.36178	2	2	2	5.1	5.1	5.1	3.743	0	0	0	12783000	16289000	7635600	0	0	0	58191000	36152000	15280000	3	ITAQEVVSSGSITK;TELSLYGLHPEVLGEDAENWK
AT1G78300	AT1G78300.1	GENERAL REGULATORY FACTOR 2 (GRF2)	GENERAL REGULATORY FACTOR 2 (GRF2);14-3-3 PROTEIN G-BOX FACTOR14 OMEGA (14-3-3OMEGA); (GF14 OMEGA)	G-box binding factor GF14 omega encoding a 14-3-3 protein The mRNA is cell-to-cell mobile.		24.3987	25.4138	25.004	25.306	28.1828	27.4033	-2.02517	1.18313	5	3	3	30.5	18.5	18.5	12.814	17375000	62409000	42672000	6229900	50289000	34078000	22181000	35058000	24855000	28587000	101630000	81177000	16	IISSIEQKEESR;QAFDEAIAELDTLGEESYK;SAQDIANAELAPTHPIR;SKIETELSGICDGILK;VSAAVDGDELTVEER
AT1G78370	AT1G78370.1	GLUTATHIONE S-TRANSFERASE TAU 20 (GSTU20)	GLUTATHIONE S-TRANSFERASE TAU 20 (ATGSTU20);GLUTATHIONE S-TRANSFERASE TAU 20 (GSTU20)	Encodes glutathione transferase belonging to the tau class of GSTs. Naming convention according to Wagner et al. (2002).		24.8852	25.2571	25.4759	25.3053	25.2336	25.1998	-0.0402154	0.377461	3	3	3	17.1	17.1	17.1	8.374	24342000	55983000	59181000	6227000	6511200	7399100	14409000	25674000	30459000	51554000	46556000	41957000	15	FGNFSIESESPK;GVEFEYREEDFSNK;NPFFPSDPYGR
AT1G78380	AT1G78380.1	GLUTATHIONE S-TRANSFERASE TAU 19 (GSTU19)	A. THALIANA GLUTATHIONE S-TRANSFERASE TAU 19 (ATGSTU19);GLUTATHIONE TRANSFERASE 8 (GST8);GLUTATHIONE S-TRANSFERASE TAU 19 (GSTU19)	Encodes a glutathione transferase that is a member of Tau GST gene family. Expression is induced by drought stress, oxidative stress, and high doses of auxin and cytokinin. naming convention according to Wagner et al. (2002) The expression of this gene is upregulated by herbicide safeners such as benoxacor and fenclorim.		27.0435	27.1792	27.2937	28.0965	29.0878	28.9251	-1.53103	1.79253	7	7	7	27.4	27.4	27.4	28.927	108660000	212160000	208650000	43104000	94165000	97860000	43870000	65679000	56477000	169820000	184520000	155410000	44	DFIEILK;EKGVEFEYREEDLR;FANFSIESEVPK;GVEFEYREEDLR;NPILPSDPYLR;SLPDPEKVTEFVSELR;VTEFVSELR
AT3G57490	AT3G57490.1	RIBOSOMAL PROTEIN US5W (US5W)	RIBOSOMAL PROTEIN US5W (US5W)	Ribosomal protein S5 family protein;(source:Araport11)		26.8748	26.4498	27.0444	23.6144	23.4025	22.7339	3.53937	3.41555	8	3	3	32.6	17.4	17.4	42.831	96671000	127970000	175530000	0	0	0	62363000	55111000	69638000	0	0	0	34	AFIVVGDSNGHVGLGVK;ATFDCLQK;EYQIIDLLVGPSLK;KVLQFAGIDDVFTSSR;SPYQEHTDFLLIPPGVK;TLGNFVK;TYGFLTPEFWK;VLQFAGIDDVFTSSR
AT1G78900	AT1G78900.2;AT1G78900.1	VACUOLAR ATP SYNTHASE SUBUNIT A (VHA-A)	VACUOLAR ATP SYNTHASE SUBUNIT A (VHA-A)	Encodes catalytic subunit A of the vacuolar ATP synthase. Mutants are devoid of vacuolar ATPase activity as subunit A is encoded only by this gene and show strong defects in male gametophyte development and in Golgi stack morphology. The mRNA is cell-to-cell mobile.		28.0775	28.5345	28.1338	28.1823	28.394	28.1562	0.00440184	0.309774	23	23	23	48	48	48	216.4	222510000	542820000	373500000	45746000	58217000	57428000	36417000	51223000	35685000	57340000	63905000	57405000	104	DALAEGDKITLETAK;DTVIELEFQGIK;EDDLNEIVQLVGK;EDYLAQNAFTPYDK;EVLQREDDLNEIVQLVGK;FDPDFINIR;FEDPAEGEDTLVEK;GVSVPALDKDCLWEFQPNK;ISGDVYIPR;ITYIAPAGQYSLK;ITYTLIK;LAADTPLLTGQR;LASFYER;LEGDSATIQVYEETAGLTVNDPVLR;LGDLFYR;LLREDYLAQNAFTPYDK;LTTFEDDEKESEYGYVR;LYDDLNAGFR;THKPLSVELGPGILGNIFDGIQRPLK;TTLVANTSNMPVAAR;VGHDNLIGEIIR;VLDALFPSVLGGTCAIPGAFGCGK;YSTALESFYEK
AT1G79040	AT1G79040.1	PHOTOSYSTEM II SUBUNIT R (PSBR)	PHOTOSYSTEM II SUBUNIT R (PSBR)	Encodes for the 10 kDa PsbR subunit of photosystem II (PSII). This subunit appears to be involved in the stable assembly of PSII, particularly that of the oxygen-evolving complex subunit PsbP. Mutants defective in this gene have reduced amounts of subunits PsbP and PsbQ in PSII. In turn, assembly of PsbR is dependent on the presence of PsbJ.		27.6709	27.0422	27.3226	26.999	28.0251	28.5066	-0.498285	0.715827	3	3	3	30.7	30.7	30.7	165.86	167860000	192950000	212870000	20143000	45080000	73215000	132700000	65920000	91149000	146180000	111480000	172090000	28	TDKPFGINGSMDLR;YGANVDGYSPIYNENEWSASGDVYK;YVDKYGANVDGYSPIYNENEWSASGDVYK
AT1G53540	AT1G53540.1	(HSP17.6C)	(HSP17.6C)	Member of the class I small heat-shock protein (sHSP) family, which accounts for the majority of sHSPs in maturing seeds		25.4977	25.4366	25.8371	21.2319	22.8395	22.1211	3.5263	2.2072	11	4	4	78.3	39.5	39.5	52.762	37217000	63402000	76019000	369880	1238700	875740	16177000	11117000	15815000	2124300	9914900	2705100	21	ASMENGVLSVTVPK;EEVKVEVEDGNILQISGER;ETPEAHVFK;FRLPENAK;KEEVKVEVEDGNILQISGER;RTNVFDPFSLDVFDPFEGFLTPSGLANAPAMDVAAFTNAK;SLIPSIFGGR;SNENEEKNDKWHR;TNVFDPFSLDVFDPFEGFLTPSGLANAPAMDVAAFTNAK;VEVEDGNILQISGER;VPEKKPEVK
AT1G79550	AT1G79550.2;AT1G79550.1	PHOSPHOGLYCERATE KINASE (PGK)	PHOSPHOGLYCERATE KINASE (PGK); (PGKC);PHOSPHOGLYCERATE KINASE 3 (PGK3)	Encodes cytosolic phosphoglycerate kinase (PGK3). Expression studies in PGK mutants showed that PGK1 and PGK3 were down-regulated in pgk3.2 and pgk1.1, respectively. These results indicate that the down-regulation of photosynthetic activity could be a plant strategy when glycolysis is impaired to achieve metabolic adjustment and optimize growth.		25.9128	26.9131	26.5592	27.704	27.3005	28.3681	-1.32918	1.74423	9	7	7	40.6	32.7	32.7	48.527	49627000	176430000	125400000	32838000	27281000	66516000	24793000	49364000	33623000	68581000	72282000	99062000	30	AQGLSVGSSLVEEDKLDLAK;FYAEEEKNDPEFAK;GVSLLLPTDVVIADK;GVTTIIGGGDSVAAVEK;LAALADVYVNDAFGTAHR;LSELLGVEVVMANDSIGEEVQK;MSHISTGGGASLELLEGKPLPGVLALDEA;TFSEALDTTK;VDLNVPLDDNSNITDDTR
AT4G03430	AT4G03430.3;AT4G03430.2;AT4G03430.1	STABILIZED 1 (STA1)	STARIK 1 (STA1);STABILIZED 1 (STA1);EMBRYO DEFECTIVE 2770 (EMB2770)	Encodes a nuclear protein similar to the human U5 small ribonucleoprotein-associated 102-kD protein and to the yeast pre-mRNA splicing factors Prp1p and Prp6p. STA1 expression is upregulated by cold stress, and the sta1-1 mutant is defective in the splicing of the cold-induced COR15A gene. Luciferase imaging was used to isolate a recessive mutant, sta1-1, with enhanced stability of the normally u…		26.2875	26.3296	26.5318	23.2897	22.6674	22.6202	3.52387	3.10196	5	5	5	5.5	5.5	5.5	16.527	64342000	117740000	123040000	1540000	1099400	0	37502000	44894000	26131000	3931400	0	0	16	AVENAHQPIEVILK;AVVELANEEDAR;KGLEHIPDSVR;LEFENKEPER;WLAGDVPAAR
AT1G79850	AT1G79850.1	RIBOSOMAL PROTEIN S17 (RPS17)	RIBOSOMAL PROTEIN US17C (US17C);PIGMENT DEFECTIVE 347 (PDE347); (CS17);RIBOSOMAL PROTEIN S17 (RPS17);PLASTID RIBOSOMAL SMALL SUBUNIT PROTEIN 17 (PRPS17)	nuclear-encoded 30S chloroplast ribosomal protein S17		26.8595	26.4677	26.8988	27.9849	27.9139	27.7644	-1.14576	2.53875	3	3	3	26.8	26.8	26.8	11.125	95649000	129570000	158680000	39896000	41737000	43771000	72381000	62384000	84188000	125150000	111110000	105130000	17	KAEAGGDELLGLPLESQQPA;KYQAHDPDNQFK;TVAVEVVR
ATCG00160	ATCG00160.1	RIBOSOMAL PROTEIN S2 (RPS2)	RIBOSOMAL PROTEIN US2C (US2C);RIBOSOMAL PROTEIN S2 (RPS2)	Chloroplast ribosomal protein S2		30.5193	30.0775	30.6267	26.7353	27.6448	26.2888	3.51815	2.54045	7	7	7	48.7	48.7	48.7	166.29	1208900000	1581799999.9999998	2102499999.9999998	16779000	34634000	15740000	429800000	351660000	476900000	26833000	44364000	17636000	115	AGVHFGHGTR;ECITLGIPTISLIDTNCNPDLADISIPANDDAIASIR;FLSEACDLVFDAASR;LETYLGGIK;QFLIVGTK;WLGGMLTNWSTTEK;YMTGLPDIVIILDQQEEYTALR
AT1G79930	AT1G79930.2;AT1G79930.1	HEAT SHOCK PROTEIN 91 (HSP91)	HEAT SHOCK PROTEIN 91 (HSP91); (AtHsp70-14)	encodes high molecular weight heat shock protein 70 not a HSP90 homolog, mRNA is constitutively expressed but transiently induced after heat shock		26.0171	26.4903	26.4724	28.5331	28.3734	28.9387	-2.28851	3.53779	11	11	3	15.3	15.3	5.8	51.894	53345000	131610000	118080000	58337000	57392000	98786000	60456000	79550000	75286000	121680000	135660000	158510000	39	EAFLANLQEVEDWLYEDGEDETK;EEFEEISIPILER;FDHIELAEK;GCALQCAILSPTFK;GIDVVLNDESNR;KTNVPLSELVYGALK;LSDKYQEYITDSER;NAVESYVYDMR;QFSDPELQR;REEFEEISIPILER;TNVPLSELVYGALK
AT3G07030	AT3G07030.1;AT3G07030.3;AT3G07030.2;AT3G07030.4;AT3G07030.5	(ALBA6)	(ALBA6)	Together with other ALBA proteins phase separates into stress granules and processing bodies under heat stress and directly binds to and recruits mRNAs to protect from degradation. Confers thermotolerance through stabilizing HSF messenger RNAs in cytoplasmic granules.		26.6653	26.446	27.163	23.4176	23.5235	22.7797	3.51785	3.7205	3	3	3	6.2	6.2	6.2	13.348	83604000	127630000	190580000	0	1990100	1382400	39907000	35761000	54852000	0	14879000	9514300	14	PKPESPINENEIR;TVAISEILK;VAKPKPESPINENEIR
AT1G80380	AT1G80380.1;AT1G80380.3;AT1G80380.8;AT1G80380.4;AT1G80380.2;AT1G80380.7;AT1G80380.6;AT1G80380.5	GLYCERATE KINASE (GLYK)	GLYCERATE KINASE (GLYK)	encodes a glycerate kinase which catalyzes the last step of photorespiration C2 cycle.		25.2896	24.252	22.1399	21.2738	23.833	24.1219	0.817609	0.551136	2	2	2	6.9	6.9	6.9	55.648	0	27893000	5861000	0	0	0	0	13391000	11712000	0	0	0	2	VLAIDIDEERNPILAN;YIDAWVVIK
AT1G80410	AT1G80410.1;AT1G80410.2	NAA15 (NAA15)	OMISHA (OMA);NAA15 (NAA15);MUTANT,SNC1-ENHANCING 6 (MUSE6);EMBRYO DEFECTIVE 2753 (EMB2753)	Encodes the catalytic subunit of a N-terminal acetyltransferase.		23.6563	23.6753	23.3765	23.4184	23.2982	23.2764	0.238427	1.23376	2	2	2	2.3	2.3	2.3	3.2096	10386000	18703000	13811000	1683700	0	1950600	8763200	9059800	7750400	16931000	0	9790700	2	DLSGFVETR;VSLLEESGSFDK
AT1G26880	AT1G26880.1;AT1G26880.2;AT1G69620.1	RIBOSOMAL PROTEIN EL34Z (EL34Z)	RIBOSOMAL PROTEIN EL34Z (EL34Z)	Ribosomal protein L34e superfamily protein;(source:Araport11)		29.9073	29.3373	29.6668	26.4938	26.295	25.6203	3.50081	3.35202	3	3	3	22.5	22.5	22.5	6.4066	791010000	946980000	1080900000	14192000	13589000	9902400	811870000	449480000	472500000	203230000	123090000	70861000	15	AFLVEEQK;AYGGVLSGSAVR;LVYQTTK
AT2G01140	AT2G01140.1	PIGMENT DEFECTIVE 345 (PDE345)	PIGMENT DEFECTIVE 345 (PDE345);FRUCTOSE-BISPHOSPHATE ALDOLASE 3 (FBA3); (ATFBA3)	Plastid localized fructose 1,6-bisphosphate aldolase, a CBB pathway enzyme.		26.1901	26.2679	26.2484	25.5974	26.022	27.4762	-0.129737	0.376306	5	4	4	22	19.9	19.9	41.299	60142000	112810000	101100000	7624600	0	35846000	42161000	50274000	42082000	42772000	0	98125000	18	EAAWGLAR;GILAIDESNATCGK;GLSPLAGSNEESWCQGLDGLASR;LASIGLDNTEDNR;YAAISQDNGLVPIVEPEILLDGDHPIER
AT4G34555	AT4G34555.1;AT2G16360.1	RIBOSOMAL PROTEIN ES25X (ES25X)	RIBOSOMAL PROTEIN ES25X (ES25X)	Ribosomal protein S25 family protein;(source:Araport11)		26.1251	25.8335	26.2742	24.0877	21.9079	21.7421	3.49838	1.69637	4	1	0	45.4	13	0	7.9817	57495000	83480000	102920000	0	0	0	49169000	48497000	61600000	0	0	0	14	DKVPPPSSKPAK;LITPSILSDR;MVSAHSSQQIYTR;VNNMVLFDQATYDK
AT2G01520	AT2G01520.1;AT2G01530.1	MLP-LIKE PROTEIN 328 (MLP328)	MLP-LIKE PROTEIN 328 (MLP328);(ZUSAMMEN-CA)-ENHANCED 1 (ZCE1)	Encodes a cis-cinnamic acid responsive gene that is a member of the major latex protein-like gene family and plays a role in promoting vegetative growth and delaying &#64258;owering. The mRNA is cell-to-cell mobile.		23.1131	24.037	23.8905	27.2923	26.5994	27.0051	-3.28538	3.22299	6	3	2	41.1	24.5	17.2	15.288	7127200	24031000	19722000	24684000	16781000	25859000	26366000	34599000	24730000	63503000	37284000	38809000	10	ATSGTYVTEVPLK;ATSGTYVTEVPLKGSAEK;EIDDENMAVTFR;GLEGHVMEQLK;ITMIWEK;IWNYTCDGKPEVFK
AT2G01970	AT2G01970.1	0	0	Endomembrane protein 70 protein family;(source:Araport11)		20.5595	22.2848	19.7313	26.1886	25.6675	26.7267	-5.33574	2.28074	3	3	3	4.2	4.2	4.2	3.6826	1214000	0	0	11486000	8796200	21321000	4556400	0	0	26132000	27653000	58759000	4	AEFQAPVR;VIEINAR;WKETETSFEK
AT2G02010	AT2G02010.1;AT2G02000.1;AT2G02010.2	0	0	Glutamate decarboxylase		23.9539	23.4747	23.8389	26.3292	25.7676	26.0033	-2.27754	3.5962	2	2	1	2.8	2.8	1.4	3.1088	12765000	0	19029000	12662000	9428100	12914000	19703000	0	19036000	0	0	0	3	LGFEGYR;YFEVELK
ATCG00640	ATCG00640.1	RIBOSOMAL PROTEIN L33 (RPL33)	RIBOSOMAL PROTEIN L33 (RPL33);RIBOSOMAL PROTEIN BL33C (BL33C)	encodes a chloroplast ribosomal protein L33, a constituent of the large subunit of the ribosomal complex		25.6043	24.8816	25.2214	21.7374	21.4815	22.0702	3.47272	3.88015	2	2	2	30.3	30.3	30.3	8.1838	40072000	43156000	49610000	0	0	0	59911000	37717000	41910000	0	0	0	8	HTIHGEIK;VTIILECTSCVR
AT5G37720	AT5G37720.2;AT5G37720.1	(ALY4)	(ATALY4);INTERACTING WITH DNA-BINDING DOMAIN OF ZN-FINGER PARP 1 (DIP2); (ALY4)	Encodes a member of a family of proteins involved in export of RNAs from the nucleus and transcriptional coactivation.		27.6864	26.9456	27.91	23.1619	25.6256	23.4247	3.44322	1.75561	6	6	6	28.2	28.2	28.2	80.418	169670000	180450000	319830000	1409500	8544100	2161800	72901000	41629000	81962000	3960000	9676300	4130800	25	AAGASGVEVGTR;ELFSEIGEVER;LEILGGNNSSEAPLSGR;LHVTNLDQGVTNEDIR;RSDAFQALK;SLPWQSGLFEDGLR
AT2G02740	AT2G02740.1	WHIRLY 3 (WHY3)	A. THALIANA WHIRLY 3 (ATWHY3);PLASTID TRANSCRIPTIONALLY ACTIVE11 (PTAC11);WHIRLY 3 (WHY3)	Encodes a homolog of the potato p24 protein. It shares the conserved KGKAAL domain, a putative DNA-binding domain, with potato p24 and is localized to the plastid and not the nucleus.		18.7563	22.3692	20.7416	26.9687	27.608	27.2045	-6.63804	1.97633	4	3	3	17.5	13.4	13.4	7.4977	0	0	0	19725000	33762000	29693000	0	0	0	59585000	37414000	70663000	5	APEFVALESGAFK;ESCEFFHDPFK;LLNVDESVYIPITK;YGGDYEWSR
AT1G70600	AT1G70600.1;AT1G23290.1	RIBOSOMAL PROTEIN UL15X (UL15X)	RIBOSOMAL PROTEIN UL15X (UL15X)	Ribosomal protein L18e/L15 superfamily protein;(source:Araport11)		31.1161	30.8479	31.2585	27.3957	27.6089	27.9969	3.40697	3.9978	8	8	8	45.9	45.9	45.9	24.911	1828299999.9999998	2698100000	3257899999.9999995	26519000	33783000	51427000	1141800000	1225500000	1502699999.9999998	101470000	111640000	134770000	59	DNVPLIDVTQHGFFK;EAGGAVVLTA;FFCPIVNLDK;FFCPIVNLDKLWSLVPEDVK;GHLPENKPFVVK;IKEAGGAVVLTA;LWSLVPEDVK;YHPGYFGK
AT5G59870	AT5G59870.1	HISTONE H2A 6 (HTA6)	(H2A.W.6);HISTONE H2A 6 (HTA6)	Encodes HTA6, a histone H2A protein.		25.6338	25.4403	26.0667	23.8019	20.2752	22.9742	3.36314	1.38099	2	1	1	21.3	15.3	15.3	28.184	40899000	63564000	89135000	0	0	0	59462000	47201000	67207000	0	0	0	14	AGLQFPVGR;LLSGVTIAHGGVLPNINSVLLPK
AT2G04030	AT2G04030.2;AT2G04030.1	(CR88)	(CR88);EMBRYO DEFECTIVE 1956 (emb1956);HEAT SHOCK PROTEIN 90.5 (HSP90.5);HEAT SHOCK PROTEIN 88.1 (Hsp88.1);HEAT SHOCK PROTEIN 90.5 (AtHsp90.5); (ATHSP90C); (HSP90C)	Encodes a chloroplast-targeted 90-kDa heat shock protein located in the stroma involved in red-light mediated deetiolation response and crucial for protein import into the chloroplast stroma. Mutants are resistant to chlorate, have elongated hypocotyls in light, and affect the expression of NR2, CAB, and RBCS but NOT NR1 and NiR.		25.4549	26.197	25.8869	26.7359	26.4542	26.9967	-0.882701	1.77287	8	8	8	20.3	20.3	20.3	91.741	36129000	107400000	78691000	16786000	15174000	25710000	24593000	28652000	21267000	45292000	46622000	55457000	22	AFNEFLDPLAHTHFTTEGEVEFR;FLSVTEPSLLGDGGDLEIR;ILEINPDHPIIK;QYVWESVADSSSYLIR;TIEVEEDEPVKEGEEGEPK;VEEEEESSTVNEGDDKSGETEVVEPSEVR;VFISDDFDGELFPR;VVDLLYDTAIISSGFTPDSPAELGNK
AT3G10610	AT3G10610.1;AT2G05220.2;AT2G05220.1;AT5G04800.4;AT5G04800.3;AT5G04800.2;AT5G04800.1;AT2G04390.1	RIBOSOMAL PROTEIN ES17X (ES17X)	RIBOSOMAL PROTEIN ES17X (ES17X)	Ribosomal S17 family protein;(source:Araport11)		28.6453	28.7331	29.1388	28.5986	29.4297	28.7027	-0.0712631	0.383041	5	5	5	17.9	17.9	17.9	25.673	329820000	622960000	749600000	61047000	119350000	83877000	184070000	203360000	242770000	142910000	217540000	140930000	51	ILEEVAIIPSK;ILEEVAIIPSKR;KILEEVAIIPSK;KILEEVAIIPSKR;RMDFVPDESAIK
AT2G04520	AT2G04520.1;AT5G35680.2;AT5G35680.1;AT5G35680.3	0	0	Nucleic acid-binding, OB-fold-like protein;(source:Araport11)		22.3707	21.4198	22.0774	25.3274	28.1766	28.163	-5.26638	1.9323	2	2	2	28.3	28.3	28.3	29.071	4260100	0	5612200	6323200	50073000	57699000	9621400	0	8327200	90023000	212900000	140730000	6	AYGELPENTR;LNEGIVGDLEDDDDNNDDDYVEFEDEDIDRI
AT2G05100	AT2G05100.1;AT2G05070.1;AT3G27690.1;AT3G27690.2;AT2G05100.2	0	0	Lhcb2.1 protein encoding a subunit of the light harvesting complex II. Member of a gene family with high degree of sequence similarity. Initially LHCB2.3 was considered as a separate gene but appears to be an allele of LHCB2.1.		30.3668	29.936	30.2915	30.5884	30.2282	31.0638	-0.428711	0.968151	7	4	4	45.7	38.9	38.9	51.765	1087700000	1434000000	1666599999.9999998	242470000	207580000	430940000	568500000	428130000	633070000	476240000	373120000	607630000	56	ELEVIHSR;FGEAVWFK;IGGGPLGEGLDPLYPGGAFDPLNLAEDPEAFSELK;NRELEVIHSR;STPQSIWYGPDRPK;WAMLGALGCTFPEILSK;YLGPFSENTPSYLTGEYPGDYGWDTAGLSADPETFAK
AT2G05380	AT2G05380.3;AT2G05380.1;AT2G05380.2	0	0	glycine-rich protein 3 short isoform (GRP3S) mRNA, completeThe mRNA is cell-to-cell mobile.		23.4402	22.8784	22.6648	23.5637	23.528	23.1761	-0.428138	1.00142	2	2	2	33.3	33.3	33.3	14.913	8940900	10765000	8432500	1862100	1996300	1819600	8387800	8987700	3425500	9220600	8872400	7543400	2	SESEETVKPEQHGGGFGDNGGGR;YQGGGGHGGHGGGGYQGGGGR
AT2G05710	AT2G05710.1	ACONITASE 3 (ACO3)	ACONITASE 3 (ACO3)	Encodes an aconitase that can catalyze the conversion of citrate to isocitrate through a cis-aconitate intermediate, indicating that it may participate in the TCA cycle and other primary metabolic pathways. The protein is believed to accumulate in the mitochondria and the cytosol. It affects CSD2 (At2g28190 - a superoxide dismutase) transcript levels and may play a role in the response to oxidati…		23.3404	22.9598	23.2721	24.5386	24.2919	23.6566	-0.971586	1.61316	4	1	1	7.4	2.5	2.5	3.5419	8343400	11390000	0	3659900	3389900	2538800	11839000	10401000	0	17552000	15125000	10687000	2	INPLVPVDLVIDHSVQVDVAR;LSVPENTLYSWDPNSTYIHEPPYFK;SENAVQANMELEFQR;TSLAPGSGVVTK
AT2G05920	AT2G05920.1	SUBTILASE 1.8 (SBT1.8)	SUBTILASE 1.8 (SBT1.8)	Subtilase family protein;(source:Araport11)		24.4405	23.4492	23.8031	25.066	23.9631	24.1561	-0.497515	0.78322	2	2	2	5.4	5.4	5.4	10.746	17885000	15989000	18563000	5275400	2699100	0	14377000	8953400	9563700	16618000	15853000	0	4	AILDGVDVLSLSLGGGSAPYYR;DVDGHGTHTSTTAAGSAVR
AT2G05990	AT2G05990.2;AT2G05990.1	MOSAIC DEATH 1 (MOD1)	MOSAIC DEATH 1 (MOD1);ENOYL-ACP REDUCTASE 1 (ENR1)	Encodes enoyl-ACP reductase a component of the fatty acid synthase complex. A reduced function mutation in this gene, mod1, was found in a screen for premature cell death mutants. Mutant plants have reduced lipid level and pleiotropic morphological defects, including chlorotic and abnormally shaped leaves. The mRNA is cell-to-cell mobile.		23.1907	22.9664	22.6974	25.3845	25.0879	24.9147	-2.17754	3.70931	2	2	2	9.5	9.5	9.5	21.354	7520900	11442000	8625400	6578500	0	6072300	5839000	10086000	9133100	24112000	0	25011000	7	AFIAGIADDNGYGWAIAK;VYALDAVFDNPEDVPEDVK
AT2G06850	AT2G06850.2;AT2G06850.1	XYLOGLUCAN ENDOTRANSGLUCOSYLASE/HYDROLASE 4 (XTH4)	ENDOXYLOGLUCAN TRANSFERASE A1 (EXGT-A1);ENDOXYLOGLUCAN TRANSFERASE (EXT);XYLOGLUCAN ENDOTRANSGLUCOSYLASE/HYDROLASE 4 (XTH4)	endoxyloglucan transferase (EXGT-A1) gene		24.6713	24.4722	23.7493	25.1332	25.5893	25.7804	-1.2034	1.83447	2	2	2	9.7	9.7	9.7	5.9582	20989000	32492000	17883000	5526900	8332100	0	46629000	24718000	17753000	25303000	28872000	0	3	IYLWFDPSK;LYSSLWNADDWATR
AT2G07050	AT2G07050.1;AT2G07050.2	CYCLOARTENOL SYNTHASE 1 (CAS1)	CYCLOARTENOL SYNTHASE 1 (CAS1)	Involved in the biosynthesis of brassinosteroids. Catalyzes the reaction from epoxysqualene to cycloartenol.		24.2458	23.3648	23.3263	21.0735	27.6911	22.4181	-0.08195	0.313591	4	4	4	7.5	7.5	7.5	6.6037	15628000	15081000	13338000	0	35763000	0	30641000	23622000	19090000	0	71829000	0	8	ACEFLLSK;ENLISPVLPQVK;GAWPFSTADHGWPISDCTAEGLK;TAIEHIHYEDENTR
AT2G07698	AT2G07698.1;ATMG01190.1	0	0	ATPase, F1 complex, alpha subunit protein;(source:Araport11)		28.15	27.9912	27.5525	29.1694	28.9666	29.048	-1.16347	2.115	10	9	9	16.2	15.3	15.3	99.196	233970000	372480000	249640000	90676000	86579000	106560000	138580000	150260000	100190000	319790000	285940000	243750000	43	AAELTNLFESR;AVDSLVPIGR;ELLIGDR;EVAAFAQFGSDLDAATQALLNR;GMALNLENENVGIVVFGGDTAIK;PAINVGLSVSR;QMSLLLR;QPQYAPLPIEK;TTIAIDTILNQK;VVDAMGVPIDGK
AT5G22770	AT5G22770.6;AT5G22770.5;AT5G22770.4;AT5G22770.3;AT5G22770.2;AT5G22770.1;AT5G22780.2;AT5G22780.1	ALPHA-ADAPTIN (alpha-ADR)	ALPHA-ADAPTIN (AP2A1);ALPHA-ADAPTIN (alpha-ADR)	AP-2 complex subunit alpha-1. Part of endomembrane trafficking system.		26.3991	25.608	26.3162	23.3288	25.0312	19.8803	3.361	1.11502	5	5	5	8	8	8	25.065	69518000	71400000	105960000	0	0	0	32601000	21158000	33857000	0	0	0	12	AGDFVSDDIWFR;ALQYFPTIEDPSTR;DLGVLTSSTSLLVALVSNNHEAYSSCLPK;KNPDAVNVDGWADR;LLISSSCRPLVR
AT3G46230	AT3G46230.1	HEAT SHOCK PROTEIN 17.4 (HSP17.4)	ARABIDOPSIS THALIANA HEAT SHOCK PROTEIN 17.4 (ATHSP17.4);HEAT SHOCK PROTEIN 17.4 (HSP17.4)	Member of the class I small heat-shock protein (sHSP) family, which accounts for the majority of sHSPs in maturing seeds.Induced by heat, cold, salt, drought and high-light.		31.3962	31.2963	31.3906	27.1857	29.3779	27.4626	3.3523	1.7044	15	14	9	85.9	80.1	59	298.59	2220100000	3681699999.9999995	3570199999.9999995	22926000	115140000	35509000	977470000	803620000	802990000	80760000	135840000	73876000	205	ADVPGLKK;ASMENGVLSVTVPK;DVAAFTNAK;EEVKVEVEDGNILQISGER;ETPEAHVFK;FRLPENAK;FRLPENAKVEEVK;KEEVKVEVEDGNILQISGER;LPENAKVEEVK;RTNVFDPFSLDVWDPFEGFLTPGLTNAPAK;SLVPSFFGGR;SSENEEKSDTWHR;TNVFDPFSLDVWDPFEGFLTPGLTNAPAK;VEVEDGNILQISGER;VQESKPEVK
AT4G14040	AT4G14040.1	SELENIUM-BINDING PROTEIN 2 (SBP2)	EMBRYO SAC DEVELOPMENT ARREST 38 (EDA38);SELENIUM-BINDING PROTEIN 2 (SBP2)	selenium-binding protein 2;(source:Araport11)		25.9461	25.9931	26.1169	23.3343	22.9465	21.7917	3.32788	2.04909	5	5	4	19.5	19.5	14.6	60.585	50785000	93244000	92291000	0	0	0	28841000	30374000	33196000	0	0	0	12	AVGEDGNTYQFDVPQIK;DKPDYLATVDVDPSSPTFSSVIHR;GNGFLLLDSDFNVK;QIIDLGNTGLLPLEIR;QYNIEDPKNPVLTGQIWVGGLLQK
AT2G10940	AT2G10940.2;AT2G10940.1	0	0	Bifunctional inhibitor/lipid-transfer protein/seed storage 2S albumin superfamily protein;(source:Araport11)		27.663	27.8692	27.5419	28.6604	28.6141	29.055	-1.08518	2.63661	3	3	3	11	11	11	21.25	166940000	342280000	247810000	63719000	67812000	107080000	211800000	252640000	196170000	106020000	130520000	131050000	21	ATCPIDTLK;IGLGDPAVNK;LGACVDLLGGLVK
AT2G13360	AT2G13360.3;AT2G13360.2;AT2G13360.1	ALANINE:GLYOXYLATE AMINOTRANSFERASE (AGT)	ALANINE:GLYOXYLATE AMINOTRANSFERASE (AGT);ALANINE:GLYOXYLATE AMINOTRANSFERASE 1 (AGT1);L-SERINE:GLYOXYLATE AMINOTRANSFERASE (SGAT)	Encodes a peroxisomal photorespiratory enzyme that catalyzes transamination reactions with multiple substrates. It is involved in photorespiration.		26.1564	26.9679	26.0187	27.5403	27.9633	27.6838	-1.34812	1.81474	5	5	5	28.4	28.4	28.4	98.38	58756000	183260000	86215000	29315000	43189000	41392000	20257000	44410000	21510000	86032000	88348000	98528000	38	AALDLIFEEGLENIIAR;AICIVHNETATGVTNDISAVR;DVGYPVVMGSGVAAASTYLQHHIPLIPSR;HHLFVPGPVNIPEPVIR;TTSGTPFLFPTTGTGAWESALTNTLSPGDR
AT1G09770	AT1G09770.1	CELL DIVISION CYCLE 5 (CDC5)	ARABIDOPSIS THALIANA CELL DIVISION CYCLE 5 (ATCDC5);CELL DIVISION CYCLE 5 (CDC5);ARABIDOPSIS THALIANA MYB DOMAIN CELL DIVISION CYCLE 5 (ATMYBCDC5)	Member of MYB3R- and R2R3- type MYB- encoding genes. Essential for plant innate immunity. Interacts with MOS4 and PRL1. The mRNA is cell-to-cell mobile.		24.9799	24.6527	24.482	20.0062	22.8981	21.2387	3.32389	1.56703	2	2	2	3	3	3	3.7974	25994000	36824000	29716000	0	0	0	22067000	19319000	15679000	0	0	0	5	GIDYNAEIPFEK;QAEIGGTEVECFK
AT2G16940	AT2G16940.1;AT2G16940.3;AT2G16940.2;AT2G16940.5;AT2G16940.4	CC1- LIKE SPLICING FACTOR (CC1)	CC1- LIKE SPLICING FACTOR (CC1)	Splicing factor which interacts with IRR and SR45 to mediate pre-mRNA splicing to facilitate protein function, however not contributing to target specificity.		21.4658	21.5629	22.4452	26.7009	26.476	26.7935	-4.83217	2.96215	6	6	6	13.4	13.4	13.4	18.62	2275200	4325100	7242300	16383000	15405000	22332000	3971500	4350800	5369800	52376000	22176000	24932000	12	DVYEFFSR;FENAQAAIGAQR;LYVGNLHINMSEDDLR;MDFDEYEYLEK;NSVGFVYLR;TVENPHLENEVGNGGGDEK
AT1G18170	AT1G18170.1	0	0	FKBP-like peptidyl-prolyl cis-trans isomerase family protein;(source:Araport11)		25.9472	25.4987	25.8654	23.807	23.6954	19.8393	3.32322	1.20722	2	2	2	8.5	8.5	8.5	3.028	50825000	66192000	77524000	0	0	0	61304000	50310000	57680000	0	0	0	4	AGDLVVIDLK;GLCEGIDYVLR
AT2G17420	AT2G17420.2;AT4G35460.1;AT2G17420.1	NADPH-DEPENDENT THIOREDOXIN REDUCTASE A (NTRA)	NADPH-DEPENDENT THIOREDOXIN REDUCTASE A (NTRA);NADPH-DEPENDENT THIOREDOXIN REDUCTASE 2 (NTR2);THIOREDOXIN REDUCTASE A (ATNTRA)	NADPH-dependent thioredoxin reductase, major cytosolic isoform The mRNA is cell-to-cell mobile.		22.5539	20.9727	22.5967	24.8937	25.5012	23.3804	-2.55068	1.72077	2	2	2	8.6	8.6	8.6	12.694	0	0	8043800	0	0	2096400	0	0	9999400	0	0	11272000	5	GISACAVCDGAAPIFR;VSGLFFAIGHEPATK
AT5G23900	AT5G23900.1	RIBOSOMAL PROTEIN EL13X (EL13X)	RIBOSOMAL PROTEIN EL13X (EL13X)	Ribosomal protein L13e family protein;(source:Araport11)		30.0103	29.3607	29.847	25.9678	26.4587	26.8278	3.32125	3.50912	8	3	3	23.8	11.7	11.7	97.256	849560000	962440000	1224700000	9856600	15221000	22869000	1209700000	753240000	1167300000	57925000	77251000	79419000	23	GFTLEELK;HWQNYVK;KHWQNYVK;KLAPTIGISVDHR;LAPTIGISVDHR;SLEGLQSNVQR;TWFNQPAR;TWFNQPARK
AT2G18040	AT2G18040.1	PEPTIDYLPROLYL CIS/TRANS ISOMERASE, NIMA-INTERACTING 1 (PIN1AT)	PEPTIDYLPROLYL CIS/TRANS ISOMERASE, NIMA-INTERACTING 1 (PIN1AT)	phosphorylation-specific peptidyl prolyl cis/trans isomerase (PPIase) with specificity for phosphoserine-proline bonds The mRNA is cell-to-cell mobile.		23.3077	23.0718	24.3194	26.7402	25.6826	26.5478	-2.75722	2.53941	4	4	4	39.5	39.5	39.5	12.041	8156400	12309000	26549000	16836000	8888200	18834000	18143000	17310000	22913000	32033000	32566000	28722000	4	ANFEEVATR;RGGDLGSFGR;SIREDIVSGK;VGDISDIVDTDSGVHIIK
AT2G18330	AT2G18330.1	SHOT1 BINDING ATPASE 3 (SBA3)	SHOT1 BINDING ATPASE 3 (SBA3);ATPASE FAMILY AAA DOMAIN-CONTAINING PROTEIN 3B1 (ATAD3B1)	Homologue of animal ATPase Family AAA Domain-Containing Protein 3 (ATAD3), which is involved in mitochondrial nucleoid organization; interacts with SHOT1.		22.8244	23.1168	23.3086	24.125	22.6315	22.7721	-0.0929317	0.363265	2	2	2	7.7	7.7	7.7	5.0384	5834600	12699000	13176000	0	0	0	10621000	10467000	4160500	0	0	0	4	DIVLVLATNRPGDLDSAVTDRIDEVIEFPLPGEEER;ITIEGDLTDQVIK
AT5G60790	AT5G60790.1	ATP-BINDING CASSETTE F1 (ABCF1)	ARABIDOPSIS THALIANA GENERAL CONTROL NON-REPRESSIBLE 1 (ATGCN1);GENERAL CONTROL NON-DEREPRESSIBLE 20 (GCN20);ATP-BINDING CASSETTE F1 (ABCF1);GENERAL CONTROL NON-REPRESSIBLE 1 (GCN1)	Member of GCN subfamily. Is one of 5 Arabidopsis homologs for the yeast protein GCN20, which is a F-type ATP binding cassette protein that functions together with yeast GCN1 and GCN2 in translational control. None of these five Arabidopsis homologs are individually required for GCN2 kinase activity.		25.9999	25.6417	26.0126	23.4951	21.6844	22.537	3.31252	2.00834	3	3	3	6.6	6.6	6.6	21.524	52714000	73085000	85851000	0	0	0	46764000	41633000	51091000	0	0	0	12	EVEILVQQDDGGGER;NIDFGVDLDSR;YYTGNFDQYCQTR
AT4G21110	AT4G21110.2;AT4G21110.1	0	0	G10 family protein;(source:Araport11)		24.5111	24.9096	24.5096	21.2022	20.4283	22.3634	3.31215	1.94444	2	2	2	20	20	20	2.0691	18783000	44002000	30290000	0	0	0	17551000	18827000	12548000	0	0	0	1	ELYEFCLDQGYADR;VKYPEGWELIEPTLR
AT3G04920	AT3G04920.2;AT3G04920.1	RIBOSOMAL PROTEIN ES24Z (ES24Z)	RIBOSOMAL PROTEIN ES24Z (ES24Z)	Ribosomal protein S24e family protein;(source:Araport11)		30.6883	29.9767	30.6805	27.0189	27.1505	27.2482	3.3093	2.82722	4	4	2	32.1	32.1	21.4	67.123	1359200000	1475099999.9999998	2182400000	20423000	24588000	30606000	1076700000	822310000	1276000000	122380000	123650000	122830000	77	DPNAIFVFK;KQFVIDVLHPGR;QFVIDVLHPGR;SSGFGLIYDTVESAK
AT2G19480	AT2G19480.3;AT2G19480.2;AT2G19480.1	NUCLEOSOME ASSEMBLY PROTEIN 1;2 (NAP1;2)	NUCLEOSOME/CHROMATIN ASSEMBLY FACTOR GROUP A 02 (NFA02);NUCLEOSOME/CHROMATIN ASSEMBLY FACTOR GROUP A 2 (NFA2);NUCLEOSOME ASSEMBLY PROTEIN 1;2 (NAP1;2)	This gene is predicted to encode a nucleosome assembly protein. Plant lines expressing an RNAi construct directed against this gene show a reduction in agrobacterium-mediated root transformation. The mRNA is cell-to-cell mobile. Plants mutated in three ubiquitously expressed NAP1 genes (NAP1;1~NAP1;3) and organ-specifically expressed NAP1;4 gene show hypersensitivity to genotoxic stresses includi…		24.3368	24.5948	24.6943	25.4234	25.8411	25.6709	-1.10314	2.89538	3	3	3	13.4	13.4	13.4	7.679	16645000	35375000	34429000	6758300	9920500	10256000	13827000	18673000	10964000	31488000	22887000	31783000	6	ALGTEIEWYPGK;LQNLAGQHSDVLENLTPPVR;NNEITAEEITERDEGALK
AT2G19730	AT2G19730.3;AT2G19730.2;AT2G19730.1	RIBOSOMAL PROTEIN EL28Z (EL28Z)	RIBOSOMAL PROTEIN EL28Z (EL28Z)	Ribosomal L28e protein family;(source:Araport11)		27.6368	27.4579	27.6171	26.6277	27.8664	26.4934	0.574757	0.798023	3	2	2	25.9	16.8	16.8	38.142	163940000	257380000	261080000	15573000	40385000	18138000	154320000	137130000	147960000	91806000	205610000	73236000	12	ATVPGQLIWEIVK;AVANQVVDNYYRPDLK;NNNCFLVK
AT2G19860	AT2G19860.2;AT2G19860.1	HEXOKINASE 2 (HXK2)	ARABIDOPSIS THALIANA HEXOKINASE 2 (ATHXK2);HEXOKINASE 2 (HXK2)	Encodes a protein with hexokinase activity (AtHXK2) and acts as a sensor for plant sugar responses.		24.1289	22.7418	23.7538	22.9823	22.7937	22.2325	0.87199	1.09987	3	2	2	14.5	11.5	11.5	5.3514	14411000	9792500	17939000	0	0	0	12312000	10051000	9550900	0	0	0	3	GFSIDDTVDKDVVGELVK;IISGMYLGEILR;SSHLPLTEYDHSLDVDSLNPGEQILEK
AT2G19940	AT2G19940.3;AT2G19940.1;AT2G19940.2	0	0	Putative N-acetyl-gamma-glutamyl-phosphate reductase;(source:Araport11)		25.6823	24.7654	23.8249	26.367	24.1494	25.4602	-0.568006	0.571774	2	2	2	6.4	6.4	6.4	5.8531	0	39814000	18845000	0	3071000	8862700	0	20977000	10555000	0	15766000	25267000	6	HENIIIDAK;IGLLGASGYTGAEIVR
ATMG00560	ATMG00560.1;AT2G07715.1	(RPL2)	(RPL2);RIBOSOMAL PROTEIN UL2MZ (UL2MZ)	encodes a mitochondrial ribosomal protein L2, a constituent of the large subunit of the ribosomal complex		25.5031	24.7884	25.4424	21.6495	23.2193	20.9407	3.30816	1.84256	4	4	4	19.2	19.2	19.2	10.377	37357000	40455000	57826000	0	0	0	38299000	15969000	26783000	0	0	0	11	ETASLAFASSFGFPR;ILEPTTNTISGLFSFSFLPGK;STSSMGIVESIEYDPNR;TDQGNLPAKPIGER
AT3G26450	AT3G26450.1	0	0	Polyketide cyclase/dehydrase and lipid transport superfamily protein;(source:Araport11)		25.6217	25.9419	25.8807	22.9368	20.0683	24.5399	3.29973	1.19751	4	3	3	35.5	30.9	30.9	27.51	40557000	89995000	78351000	0	0	4683100	20754000	39717000	34247000	0	0	23149000	11	ATSGTYVTQVPLK;ITMIWEK;IWNYTLGDGKEEVFK;VYEIDFQFIPNSEEDCVCK
AT2G20260	AT2G20260.1	PHOTOSYSTEM I SUBUNIT E-2 (PSAE-2)	PHOTOSYSTEM I SUBUNIT E-2 (PSAE-2)	Encodes subunit E of photosystem I. The mRNA is cell-to-cell mobile.		23.2565	24.0837	24.4731	26.5704	26.9968	23.6669	-1.80692	0.958424	2	1	1	22.8	13.8	13.8	34.461	7872200	24822000	29535000	14966000	22103000	2557000	10282000	22172000	19184000	65177000	88065000	9516900	10	NVGSVVAVDQDPK;VNYANISTNNYALDEVEEVK
AT2G20420	AT2G20420.1	0	0	ATP citrate lyase (ACL) family protein;(source:Araport11)		22.5068	24.0261	23.0427	27.3136	27.3898	27.0489	-4.05889	2.34858	4	4	4	12.8	12.8	12.8	6.6688	4681800	23851000	10958000	25052000	29023000	26657000	12483000	15757000	16105000	41692000	36761000	50273000	9	AIQDVFPNESELVVK;LITADDLDDAAEK;RDEAEEIAGK;VPIDVFAGITDEDAAK
AT3G10690	AT3G10690.1	DNA GYRASE A (GYRA)	DNA GYRASE A (GYRA)	Encodes a protein that when expressed together with GYRB2 generates an active supercoiling DNA gyrase enzyme that shares similar properties to its bacterial counterpart, including sensitivity to gyrase-specific antibiotics.		25.5528	25.3678	25.4827	21.5545	21.644	23.3272	3.29254	1.84736	4	4	4	5.7	5.7	5.7	19.058	38667000	60451000	59464000	0	0	2020500	15947000	18031000	18799000	0	0	8337000	6	LIEQEAIELK;NAVIITEIPYQTNK;STGIIAIQLNSGDELK;TLEGISDIRDESDR
AT4G00100	AT4G00100.1	RIBOSOMAL PROTEIN S13A (RPS13A)	(RPS13);RIBOSOMAL PROTEIN S13A (ATRPS13A);POINTED FIRST LEAF 2 (PFL2);RIBOSOMAL PROTEIN US15Y (US15Y);RIBOSOMAL PROTEIN S13A (RPS13A)	Encodes a cytoplasmic ribosomal protein S13 homologue involved in early leaf development The mRNA is cell-to-cell mobile.		31.6725	31.3148	31.7291	27.546	28.6857	28.6104	3.29144	2.46675	9	9	1	57	57	7.9	111.56	2688800000	3729099999.9999995	4514500000	29431000	71261000	78679000	848070000	636320000	802850000	60261000	108290000	68836000	140	AHGLAPEIPEDLYHLIK;DSHGIPQVK;GISASALPYK;GLTPSQIGVILR;KGLTPSQIGVILR;LILVESR;SSPSWLK;TTSQDVDESICK;YESTTASTLVA
ATCG00770	ATCG00770.1	RIBOSOMAL PROTEIN S8 (RPS8)	RIBOSOMAL PROTEIN S8 (RPS8);RIBOSOMAL PROTEIN US8C (US8C)	chloroplast 30S ribosomal protein S8		30.7303	30.326	30.7902	27.2323	27.6242	27.1295	3.28682	4.3122	6	6	6	44.8	44.8	44.8	64.628	1399300000	1879099999.9999998	2354800000	23679000	34143000	28188000	852900000	686890000	925180000	62119000	77357000	50649000	69	DTIADIITSIR;EGFIENVR;GKDTIADIITSIR;IGSTNITESIVK;ILGGIGIVILSTSQGIMTDR;TILNLKR
AT2G39390	AT2G39390.1;AT5G02610.1;AT3G09500.1;AT5G02610.2	RIBOSOMAL PROTEIN UL29Y (UL29Y)	RIBOSOMAL PROTEIN UL29Y (UL29Y)	Ribosomal L29 family protein;(source:Araport11)		25.8715	25.249	25.5612	21.9867	24.2798	20.5713	3.2813	1.34837	2	2	2	15.4	15.4	15.4	7.7295	48227000	55671000	62788000	0	0	0	60951000	39378000	41054000	0	0	0	8	EMYFPIR;SIAQVLTVISQK
AT2G20890	AT2G20890.1	PHOTOSYSTEM II REACTION CENTER PSB29 PROTEIN (PSB29)	PHOTOSYSTEM II REACTION CENTER PSB29 PROTEIN (PSB29);THYLAKOID FORMATION1 (THF1)	Chloroplast-localized Thylakoid formation1 gene product involved in vesicle-mediated formation of thylakoid membranes. Thf1 antisense lines contain abnormal chloroplasts early in leaf development (chloroplasts have loosely stacked thylakoid membranes). Expression was induced in the light and decreased under dark conditions. G-alpha interaction partner that functions downstream of the plasma membr…		23.8015	23.4083	23.636	25.1459	25.4041	24.6155	-1.43989	2.20855	5	5	5	19.3	19.3	19.3	10.975	11485000	15543000	16532000	5575600	7327900	0	13573000	13573000	14638000	21146000	18635000	0	7	AYIEALNEDPK;EGDIEAVLK;LLELASATDPTVLDK;SQTSASLVDFSSK;SVDRDLDVYR
AT2G21170	AT2G21170.1;AT2G21170.3;AT2G21170.2	TRIOSEPHOSPHATE ISOMERASE (TIM)	TRIOSEPHOSPHATE ISOMERASE (TIM);PLASTID ISOFORM TRIOSE PHOSPHATE ISOMERASE (PDTPI)	Encodes a plastidic triose phosphate isomerase. Mutants with reduced pdTPI levels have difficulty transitioning from heterotrophic to autotrophic growth. The related phenotypes, such as chlorosis in light-grown seedlings may result from an accumulation of dihydroxyacetone phosphate (DHAP) and methylglyoxal (MG) in these mutants. Both splice variants appear to be expressed, but the At2g21170.2 var…		23.9687	25.3139	24.5963	27.7043	27.8849	27.9655	-3.22523	2.23088	8	7	7	39	36.5	36.5	22.537	12897000	58234000	32167000	32843000	40907000	50317000	5958700	25258000	7756100	57173000	43396000	90901000	18	AFADAVPSWDNIVVAYEPVWAIGTGK;FFVGGNWK;GGAFTGEISVEQLK;HVIGEKDEFIGK;IDISGQNSWVGK;IIYGGSVNGGNSAELAKEEDIDGFLVGGASLK;NVSEEVASK;TFDVCFAQLK
AT2G21330	AT2G21330.1;AT2G21330.3;AT2G21330.2	FRUCTOSE-BISPHOSPHATE ALDOLASE 1 (FBA1)	FRUCTOSE-BISPHOSPHATE ALDOLASE 1 (FBA1); (ATFBA1)	Plastid isoform of fructose-bisphosphate aldolase 1. This is one of three plastid isoforms and arose with FBA2, from a recent duplication. Functions in carbon fixation via Calvin-Benson-Bassham cycle.		26.06	27.3156	26.2747	27.8283	25.9307	28.5232	-0.877275	0.71315	8	4	4	28.1	18.3	18.3	56.2	54958000	233200000	102960000	35791000	10556000	74066000	45673000	100780000	57837000	121770000	57220000	244760000	36	AAQDILLAR;EAAWGLAR;GLVPLVGSYDESWCQGLDGLASR;KMVDVLVEQNIVPGIK;LASIGLENTEANR;MVDVLVEQNIVPGIK;TVVSIPNGPSALAVK;YAAISQDSGLVPIVEPEIMLDGEHGIDR
AT2G21390	AT2G21390.1	ALPHA2-COP (A2-COP)	ALPHA2-COP (A2-COP)	Coatomer subunit alpha-2. Part of endomembrane trafficking system. Interacts with SINAT1.		26.8926	27.3551	26.8817	28.4946	29.102	28.3589	-1.60874	2.49878	19	7	7	20.4	9.6	9.6	85.263	97874000	239670000	156810000	56803000	95096000	66094000	57557000	85200000	53289000	118820000	158430000	93258000	43	AWEVDTLR;DSQVIPIR;ERPAFALSGDSLFYAK;FDEHEGPVR;GFPEVALHFVEDER;GPPALVFDFSQLEAK;GVHFHNSQPLFVSGGDDYK;GVNWASFHPTLPLIVSGADDR;GWSESSSPNVR;IWNWQSR;LAIELGDNVPSLPEGK;LVLGELQTPFVR;NPFVICGSTYVPIYK;SSLPIPTDAIFYAGTGNLLCR;STSQVLVK;TLDVPIYITK;TVQFHHENPWIVSASDDQTIR;VVIFDLQQR;YYEYSTQK
AT3G59920	AT3G59920.1	RAB GDP DISSOCIATION INHIBITOR 2 (GDI2)	RAB GDP DISSOCIATION INHIBITOR 2 (ATGDI2);RAB GDP DISSOCIATION INHIBITOR 2 (GDI2)	RAB GDP DISSOCIATION INHIBITOR 2 The mRNA is cell-to-cell mobile.		25.133	24.2941	25.0367	21.7715	22.1443	20.7502	3.26592	2.6234	2	2	2	8.8	8.8	8.8	5.6033	28904000	28719000	43650000	0	0	0	33372000	25187000	29980000	0	0	0	7	AIAIMSHPIPNTNDSHSVQVIIPQK;FFSFVQEYDEKDPK
AT2G21870	AT2G21870.2;AT2G21870.1	MALE GAMETOPHYTE DEFECTIVE 1 (MGP1)	MALE GAMETOPHYTE DEFECTIVE 1 (MGP1);PHOSPHITE-INSENSITIVE 1 (PHI1)	Encodes the FAd subunit of mitochondrial F1F0-ATP synthase. Essential for pollen formation.		23.4355	22.854	22.5363	25.3875	25.7257	24.7411	-2.34284	2.69876	2	2	2	12.7	12.7	12.7	6.6578	0	10584000	7714300	6592300	9157800	5383700	0	12749000	10585000	18333000	20543000	33455000	4	IKHDIDTETQDIPDAR;ITLDPEDPAAVK
AT2G22170	AT2G22170.1	PLAT DOMAIN PROTEIN 2 (PLAT2)	PLAT DOMAIN PROTEIN 2 (PLAT2)	Lipase/lipooxygenase, PLAT/LH2 family protein;(source:Araport11)		24.853	24.8274	23.8436	25.6373	24.5978	26.1712	-0.960762	1.06103	2	2	1	9.8	9.8	4.4	4.0946	0	41563000	19091000	7838100	4190600	14507000	0	28115000	15545000	41123000	18988000	52130000	7	AGTDSIISAR;YGDYIGIR
AT4G02230	AT4G02230.1	RIBOSOMAL PROTEIN EL19Y (EL19Y)	RIBOSOMAL PROTEIN EL19Y (EL19Y)	Ribosomal protein L19e family protein;(source:Araport11)		31.1974	30.4441	31.2312	28.0868	28.6297	26.4237	3.24416	1.86856	7	7	4	28.4	28.4	19.2	85.079	1934399999.9999998	2039399999.9999998	3196799999.9999995	42816000	68549000	17282000	1520199999.9999998	1056299999.9999999	1714399999.9999998	108500000	136890000	87548000	56	EKTLSDQFEAK;GPGGDIPAAAPPAQTAEVPAK;GPGGDIPAAAPPAQTAEVPAKK;KVWLDPNEGSDISMANSR;TLSDQFEAK;VLMESIHK;VWLDPNEGSDISMANSR
AT2G18510	AT2G18510.1	EMBRYO DEFECTIVE 2444 (emb2444)	EMBRYO DEFECTIVE 2444 (emb2444); (JANUS)	Essential gene (embryo lethal) that is similar to component of splicosome. Regulates embryonic pattern formation through Pol II-Mediated transcription of WOX2 an PIN7 (DOI:10.1016/j.isci.2019.09.004). JANUS positively regulates PLT1 expression in the root meristem by recruiting RNA polymerase II (Pol II) to PLT1 and by interacting with PLT1. Nuclear accumulation of JANUS in root meristem depends …		24.9856	22.8863	24.8857	21.7554	20.5001	20.7829	3.2397	1.92893	2	2	2	9.4	9.4	9.4	13.091	26097000	10824000	39312000	0	0	0	15810000	12261000	21193000	0	0	0	5	SLDVGANLFIGNLDPDVDEK;VTNLHQNYGFIEYR
AT2G23350	AT2G23350.1	POLY(A) BINDING PROTEIN 4 (PAB4)	POLY(A) BINDING PROTEIN 4 (PABP4);POLY(A) BINDING PROTEIN 4 (PAB4)	polyadenylate-binding protein, putative / PABP, putative.Member of the Class II family of PABP proteins. Highly and ubiquitously expressed. The mRNA is cell-to-cell mobile.		26.3876	21.8976	24.3675	23.33	23.3205	23.9483	0.684662	0.486628	8	7	6	16.6	15.6	14.2	27.745	68967000	5454700	27450000	1583600	0	3107600	34582000	7961400	16291000	8964400	0	10393000	10	CFGFVNFENPEDAAR;DAATNTSLGYGYVNYSNTDDAEK;FTNVYVK;GYGFVQFDTEDSAK;NLSEATTDDELK;QIFVGPFLR;TLLGESLYPLVDQIESEHAAK;VSEALDVLR
AT2G24200	AT2G24200.2;AT2G24200.1;AT2G24200.3	LEUCYL AMINOPEPTIDASE 1 (LAP1)	LEUCYL AMINOPEPTIDASE 1 (LAP1); (ATLAP1)	Cytosol aminopeptidase family protein;(source:Araport11)		22.0723	24.9037	23.2789	25.825	26.1408	26.8032	-2.83806	1.51379	6	6	6	16.2	16.2	16.2	22.399	3464100	43822000	12907000	8927500	12211000	22483000	6675000	23749000	13145000	23063000	34562000	33737000	12	ASQSTSAAIVLASSVSDESK;AVDIIGFGTGAEVEK;AVDIIGFGTGAEVEKK;EIDVIEWK;GLTFDSGGYNIK;IALIGLGQSVSSPVAFHSLGEAVATVSK
AT2G24270	AT2G24270.3;AT2G24270.1;AT2G24270.4;AT2G24270.2	ALDEHYDE DEHYDROGENASE 11A3 (ALDH11A3)	ALDEHYDE DEHYDROGENASE 11A3 (ALDH11A3)	Encodes a protein with non-phosphorylating NADP-dependent glyceraldehyde-3-phosphate dehydrogenase activity. The activity of the enzyme was determined from leaf extracts; the enzyme has not been purified to confirm activity.		25.0702	25.2716	25.5381	28.0948	28.519	25.8478	-2.1939	1.24268	7	7	7	23.6	23.6	23.6	32.514	27673000	56550000	61792000	43054000	63485000	11594000	36467000	48790000	41116000	103750000	87705000	68649000	19	AGTGLFAEILDGEVYK;DACIVLDDADLDLVASNIIK;FLLSDSFPGNDR;IAWEEPFGPVVPVLR;INSVEEGINHCNASNFGLQGCVFTK;SGDLISYCAEEGVR;VVLVMESVADELVEK
AT2G24590	AT2G24590.1	RS-CONTAINING ZINC FINGER PROTEIN 22A (RSZ22a)	RS-CONTAINING ZINC FINGER PROTEIN 22A (RSZ22a);RS-CONTAINING ZINC FINGER PROTEIN 22A (At-RSZ22a)	Barta et al (2010) have proposed a nomenclature for Serine/Arginine-Rich Protein Splicing Factors (SR proteins): Plant Cell. 2010, 22:2926.		21.089	21.3137	23.4145	26.9042	26.5228	27.3894	-4.99975	2.15982	3	3	2	16.8	16.8	13.3	9.5211	1752300	3639000	14179000	18863000	15913000	33752000	13274000	14857000	14877000	41723000	32220000	65026000	8	CYECGESGHFAR;ELEDEFR;RPPGYAFLDFEDSR
AT2G25080	AT2G25080.1	GLUTATHIONE PEROXIDASE 1 (GPX1)	GLUTATHIONE PEROXIDASE 1 (ATGPX1);GLUTATHIONE PEROXIDASE 1 (GPX1); (GPXL1)	Encodes glutathione peroxidase. The mRNA is cell-to-cell mobile.		23.0916	24.6857	23.4813	24.3437	24.5923	24.3677	-0.6817	0.838592	3	3	3	22.9	22.9	22.9	15.049	7021500	37676000	14851000	3197400	4174500	0	7145300	12994000	8925000	21048000	22801000	0	6	SNAGGFLGGLIK;TQGFEILAFPCNQFGFQEPGSNSEIK;VDVNGPSTAPIYEFLK
AT4G17560	AT4G17560.1	RIBOSOMAL PROTEIN BL19CZ (BL19CZ)	RIBOSOMAL PROTEIN BL19CZ (BL19CZ)	Ribosomal protein L19 family protein;(source:Araport11)		27.9634	27.8466	28.1074	24.5389	24.7034	24.9784	3.23224	4.19232	8	3	3	34.7	18.7	18.7	155.64	205590000	336970000	366740000	3660700	4508700	6346500	114090000	103220000	102650000	58156000	59980000	63372000	11	AEEGNTEAESEEFVAEIADTEGNVEEVVEAK;AEEGNTEAESEEFVAEIADTEGNVEEVVEAKPTR;IIAGIGVEIVFPIYSPNIK;LEVPENKR;RIIAGIGVEIVFPIYSPNIK;TGDIVEIK;TGDIVEIKLEVPENK;VRPVPEIR
AT3G46040	AT3G46040.1	RIBOSOMAL PROTEIN S15A D (RPS15AD)	RIBOSOMAL PROTEIN S15A D (RPS15AD);RIBOSOMAL PROTEIN US8X (US8X)	Regulated by TCP20. The mRNA is cell-to-cell mobile.		26.8685	26.261	27.0691	23.2035	23.6788	23.6422	3.22468	3.36002	7	2	2	55.4	22.3	22.3	12.558	96253000	112270000	178570000	0	0	0	51072000	50172000	79474000	0	0	0	14	EIEGWTAR;FDVGVKEIEGWTAR;FLIVMQK;HGYIGEFEYVDDHR;ISVLNDGLK;IVVELNGR;QFGFIVLTTSAGIMDHEEAR
AT2G25670	AT2G25670.2;AT2G25670.1	0	0	hypothetical protein;(source:Araport11)		23.1919	20.2182	23.3294	25.6828	25.5055	25.3062	-3.25162	1.37922	2	2	2	11.6	11.6	11.6	7.8762	0	0	0	8089400	7861700	0	0	0	0	38711000	13991000	0	3	ELAELEALLADFGVAPK;SREPEKEPEPQVYWAPTPLK
AT2G26150	AT2G26150.4;AT2G26150.1;AT3G51910.1;AT2G26150.3;AT2G26150.2;AT1G67970.1	HEAT SHOCK TRANSCRIPTION FACTOR A2 (HSFA2)	HEAT SHOCK TRANSCRIPTION FACTOR A2 (ATHSFA2);HEAT SHOCK TRANSCRIPTION FACTOR A2 (HSFA2)	member of Heat Stress Transcription Factor (Hsf) family. Involved in response to misfolded protein accumulation in the cytosol. Regulated by alternative splicing and non-sense-mediated decay.		20.6157	21.9506	20.1384	23.5435	20.8338	25.0207	-2.23108	0.994167	2	2	2	8.1	8.1	8.1	11.34	0	0	0	0	0	0	0	0	0	0	0	0	4	HSNFSSFIR;KIDPDRWEFANEGFLAGQK
AT1G16720	AT1G16720.3;AT1G16720.1;AT1G16720.2	0	0	Encodes HCF173, a protein with weak similarities to the superfamily of the short-chain dehydrogenases/reductases. HCF173 is involved in the initiation of translation of the psbA mRNA and binds a specific site in the 5' UTR of psbA mRNA. Mutants shows a high chlorophyll fluorescence phenotype (hcf) and are severely affected in the accumulation of PSII subunits. The protein HCF173 is localized in t…		25.6802	25.5895	25.4286	22.9417	21.0581	23.0613	3.21243	1.73322	4	4	4	10.8	10.8	10.8	24.276	42238000	70492000	57274000	0	0	0	17129000	21521000	16471000	0	0	0	10	AEFSGYVFTR;KLDVAPPSPQSPPSPPTLK;SVDIVVGDVGEPSTLK;TTRPDEQETLDSLLIR
AT5G21274	AT5G21274.1;AT3G56800.1;AT3G43810.1;AT2G41110.1;AT2G27030.1;AT2G27030.3;AT3G43810.2;AT2G41110.2	CALMODULIN 6 (CAM6)	CALMODULIN 6 (CAM6); (ACAM-6)	Encodes a calmodulin isoform. Expressed in leaves.		28.0337	27.6457	27.352	27.8805	28.0032	28.2113	-0.354485	0.98278	8	2	2	57	20.1	20.1	30.309	215860000	293160000	217250000	37109000	44400000	59664000	312530000	256030000	196940000	179160000	228460000	233790000	18	ADQLTDDQISEFK;ADQLTDDQISEFKEAFSLFDKDGDGCITTK;DTDSEEELKEAFR;EADVDGDGQINYEEFVK;EAFSLFDKDGDGCITTK;ELGTVMR;MKDTDSEEELKEAFR;VFDKDQNGFISAAELR
AT3G47520	AT3G47520.1	MALATE DEHYDROGENASE (MDH)	MALATE DEHYDROGENASE (MDH);PLASTIDIC NAD-DEPENDENT MALATE DEHYDROGENASE (pNAD-MDH)	Encodes a protein with NAD-dependent malate dehydrogenase activity, located in chloroplasts. The mRNA is cell-to-cell mobile.		26.5481	25.8514	26.1941	21.2981	24.0213	23.6562	3.20597	1.54263	3	3	3	17.9	17.9	17.9	62.836	77081000	84520000	97361000	0	0	2538100	58591000	38769000	51569000	0	0	23916000	16	NGLEAVIESDLQGLTEYEQK;TKPSVNFTDEEIQELTVR;TLVEAVAENCPNAFIHIISNPVNSTVPIAAEVLK
AT2G27710	AT2G27710.3;AT2G27710.2;AT2G27710.1;AT2G27710.4	RIBOSOMAL PROTEIN P2Y (P2Y)	RIBOSOMAL PROTEIN P2Y (P2Y)	60S acidic ribosomal protein family;(source:Araport11)		29.4408	28.9433	29.2031	28.1209	29.16	28.4426	0.621229	1.07151	6	6	3	72.2	72.2	47	169.1	572450000	720640000	783760000	43838000	98997000	70040000	253170000	184200000	206070000	91765000	159260000	108430000	75	DLAELIAAGR;GKDLAELIAAGR;KEEKEESDDDMGFSLFE;LASVPSGGGGGVAVASATSGGGGGGGASAAESK;LASVPSGGGGGVAVASATSGGGGGGGASAAESKK;TILGSVGAETEDSQIELLLK
AT2G27720	AT2G27720.1;AT2G27720.4;AT2G27720.3;AT2G27720.2	RIBOSOMAL PROTEIN P2Z (P2Z)	RIBOSOMAL PROTEIN P2Z (P2Z)	60S acidic ribosomal protein family;(source:Araport11)		26.5035	26.5919	25.8834	26.0274	25.8433	26.0288	0.359753	0.913957	6	3	3	79.1	53.9	53.9	78.004	74734000	141220000	78498000	10272000	9935900	13144000	80393000	72450000	55724000	30808000	33805000	32438000	19	ASPTTGDIKDILGSVGAETEDSQIELLLK;DILGSVGAETEDSQIELLLK;DLAELIAAGR;GKDLAELIAAGR;KEEKEESDDDMGFSLFE;LASVPSGGGGGVAVASATSGGGGGGGAPAAESK
AT2G28000	AT2G28000.1	CHAPERONIN-60ALPHA (CPN60A)	CHLOROPLAST CHAPERONIN 60ALPHA (CH-CPN60A);ACCUMULATION AND REPLICATION OF CHLOROPLASTS 2 (ARC2);CHAPERONIN-60ALPHA (CPN60A); (ARC2); (CPNA1);CHAPERONIN-60ALPHA1 (CPN60ALPHA1);SCHLEPPERLESS (SLP)	Encodes chaperonin-60 alpha, a molecular chaperone involved in Rubisco folding. Mutants display aberrant chloroplast and embryo development. The mRNA is cell-to-cell mobile.		27.8907	28.5775	28.0271	30.072	30.2355	29.8261	-1.87941	2.74089	18	18	18	40.8	40.8	40.8	261.81	195490000	559260000	346880000	169510000	208640000	182730000	48935000	78497000	56136000	169950000	168900000	154810000	124	AIELPNAMENAGAALIR;ALLSPAALIAQNAGVEGEVVVEK;AVASISAGNDDLIGSMIADAIDK;DIIPILEK;DSTTLIADAASKDELQAR;ELFETDSVYDSEK;ETFEDADER;GYISPQFVTNPEK;LGADIVQK;LLAEFENAR;NATFAAIEEGIVPGGGAALVHLSTVIPAIK;NATFAAIEEGIVPGGGAALVHLSTVIPAIKETFEDADER;NVVLDEFGSPK;TNDSAGDGTTTASILAR;TVQGLIEELQK;VGAATETELEDR;VLITDQK;VVNDGVTIAR
AT2G29450	AT2G29450.1	GLUTATHIONE S-TRANSFERASE TAU 5 (GSTU5)	GLUTATHIONE S-TRANSFERASE TAU 5 (ATGSTU5);ARABIDOPSIS THALIANA GLUTATHIONE S-TRANSFERASE TAU 1 (ATGSTU1); (AT103-1A);GLUTATHIONE S-TRANSFERASE TAU 5 (GSTU5)	Encodes a member of the TAU glutathione S-transferase gene family. Gene expression is induced by exposure to auxin, pathogen and herbicides. Naming convention according to Wagner et al. (2002)		23.5014	23.2131	22.6983	24.4453	23.1947	24.8395	-1.02221	1.08621	3	3	3	27.7	27.7	27.7	27.463	9328600	13576000	8631100	3430800	1584500	5763900	7105000	9475100	6937300	12816000	7154800	28628000	9	GIPYEYVEEILENK;GWEGIGLEVITEEKFPEFK;TILESHVILEYIDETWPQNPILPQDPYER
AT2G29500	AT2G29500.1	(HSP17.6B)	(HSP17.6B)	HSP20-like chaperones superfamily protein.		31.7637	31.8723	31.696	31.0706	31.3637	30.8713	0.67554	1.81595	15	15	12	73.2	73.2	57.5	235.56	2864300000	5488500000	4412100000	338690000	456040000	377090000	993090000	969950000	993010000	607670000	794220000	731930000	256	AAMENGVLTVTVPK;ADLPGLKK;EDKNDTWHR;EEVKVEIEEDSVLK;ELTSSSLSR;ENSAIVNAR;ETPEAHVFK;FRLPENVK;HVEKEDKNDTWHR;KEEVKVEIEEDSVLK;RSNIFDPFSLDVWDPFK;SMIPSFFNNNR;SNIFDPFSLDVWDPFK;SNIFDPFSLDVWDPFKELTSSSLSR;VEIEEDSVLK
AT2G27530	AT2G27530.2;AT2G27530.1	PIGGYBACK1 (PGY1)	PIGGYBACK1 (PGY1);RIBOSOMAL PROTEIN UL1Y (UL1Y)	Encodes ribosomal protein L10aP. Identified in a screen for enhancers of as1. as1/pgy double mutants show defects in leaf vascular patterning and adaxial cell fate. Double mutant analysis indicates pgy genes function in the same pathway as REV, KAN1 and KAN2.		26.5696	26.1667	26.391	24.4483	20.9472	24.2416	3.1634	1.27333	5	2	2	26.4	12.5	12.5	9.8638	78242000	105170000	111600000	0	0	0	85601000	63866000	67426000	0	0	0	8	FPTLVSHQESLEAK;ICMLGDAQHVEEAEK;KNWQNVR;LLGPGLNK;SYHAFLASESVIK
AT2G30110	AT2G30110.1	UBIQUITIN-ACTIVATING ENZYME 1 (UBA1)	UBIQUITIN-ACTIVATING ENZYME 1 (ATUBA1);MODIFIER OF SNC1 5 (MOS5);UBIQUITIN-ACTIVATING ENZYME 1 (UBA1)	Encodes a ubiquitin-activating enzyme (E1), involved in the first step in conjugating multiple ubiquitins to proteins targeted for degradation. Gene is expressed in most tissues examined. Mutant is able to revert the constitutive defense responses phenotype of snc1, which indicates the gene is involved in defense response. It also indicates that ubiquitination plays a role in plant defense signal…		24.7418	24.3227	25.1432	24.7918	23.7807	24.8263	0.269624	0.555123	4	4	4	6.3	6.3	6.3	13.132	22039000	29294000	46995000	4362100	2378500	0	12190000	13195000	13065000	10863000	9500400	0	12	ATTLTTASVDDAAVIDDLIAK;EALKDPGDFLFSDFSK;LTVTDDDIIEK;VVELWDLSSNFVFSEDDVGK
AT2G30490	AT2G30490.1	CINNAMATE-4-HYDROXYLASE (C4H)	CINNAMATE 4-HYDROXYLASE (ATC4H);CINNAMATE-4-HYDROXYLASE (C4H); (CYP73A5);REDUCED EPRDERMAL FLUORESCENCE 3 (REF3)	Encodes a cinnamate-4-hydroxylase. Mutations in this gene impact phenylpropanoid metabolism, growth and development.		21.7713	23.6004	25.3699	25.9717	25.8164	25.7943	-2.28026	1.09964	2	2	2	7.1	7.1	7.1	3.8523	0	0	0	9883300	9752200	11172000	0	0	0	31755000	27153000	24721000	6	LPPGPIPIPIFGNWLQVGDDLNHR;NLVVVSSPDLTK
AT2G30860	AT2G30860.1;AT2G30860.2	GLUTATHIONE S-TRANSFERASE PHI 9 (GSTF9)	(ATGSTF7);GLUTATHIONE S-TRANSFERASE PHI 9 (GSTF9);GLUTATHIONE S-TRANSFERASE PHI 9 (ATGSTF9); (GLUTTR)	Encodes glutathione transferase belonging to the phi class of GSTs. Naming convention according to Wagner et al. (2002).		26.296	26.7515	26.6601	28.2348	28.0885	28.2303	-1.61531	2.73205	9	9	8	51.2	51.2	47	111.99	64726000	157730000	134490000	47442000	47105000	60454000	46023000	62258000	44470000	130160000	113590000	34637000	45	ALVTLIEK;GEHKQPAYLALQPFGTVPAVVDGDYK;GVAFETIPVDLMK;HVSAWWDDISSR;KHVSAWWDDISSR;LAGVLDVYEAHLSK;QPAYLALQPFGTVPAVVDGDYK;SQGPDLLGK;YLAGDFVSLADLAHLPFTDYLVGPIGK
AT2G30870	AT2G30870.1	GLUTATHIONE S-TRANSFERASE PHI 10 (GSTF10)	ARABIDOPSIS THALIANA GLUTATHIONE S-TRANSFERASE PHI 10 (ATGSTF10); (ATGSTF4);EARLY DEHYDRATION-INDUCED 13 (ERD13);GLUTATHIONE S-TRANSFERASE PHI 10 (GSTF10)	early dehydration-induced gene ERD13 homologous to tobacco and maize glutathione S-transferases. Encodes glutathione transferase belonging to the phi class of GSTs. Naming convention according to Wagner et al. (2002)		24.9935	24.7685	25.0624	25.8286	24.3445	23.9339	0.239145	0.443996	4	3	3	28.4	24.2	24.2	52.377	26241000	39900000	44436000	8949800	3515700	3076800	21985000	20245000	16753000	52587000	17840000	12382000	19	GVSFETVNVDLMK;IPVLVDGDYK;NEYLAGDFVSLADLAHLPFTEYLVGPIGK;SQGPDLLGK
AT2G30950	AT2G30950.3;AT2G30950.2;AT2G30950.1;AT2G30950.4;AT1G06430.3;AT1G06430.2;AT1G06430.1	0	0	Metalloprotease that functions in thylakoid membrane biogenesis. Involved in the repair of PSII following damaged incurred during photoinhibition. Forms a complex with VAR1. Mutants show a variegated phenotype, which decreases during development. Transcript and protein levels increase with light intensity. In plsp1-1 mutant plastids, the nonmature form of the protein localizes in the membrane.		27.1825	27.0696	27.0416	27.1926	27.7375	27.7511	-0.462532	1.21569	13	13	13	25.6	25.6	25.6	129.82	119650000	196650000	175190000	23037000	36933000	43370000	37158000	35959000	29901000	53907000	55835000	45653000	52	AILSEFTEIPPENR;AKENAPCIVFVDEIDAVGR;ENAPCIVFVDEIDAVGR;ETIGGDEFR;FLEYLDKDR;FQMEPNTGVTFDDVAGVDEAK;GLTWFIPSDDPTLISK;GVLLIGPPGTGK;LVEVLLEK;QVSVDVPDVK;SLVAYHEVGHAVCGTLTPGHDAVQK;TPGFSGADLANLLNEAAILAGR;VQLPGLSQELLQK
AT2G30970	AT2G30970.2;AT2G30970.1	ASPARTATE AMINOTRANSFERASE 1 (ASP1)	ASPARTATE AMINOTRANSFERASE 1 (ASP1)	ASPARTATE AMINOTRANSFERASE 1		24.0303	24.5351	23.3083	25.6325	24.4793	25.0631	-1.10039	1.36051	2	2	2	8.4	8.4	8.4	32.78	13459000	33940000	13173000	7812200	3860000	6729900	7516300	19303000	8669700	28640000	16801000	23580000	5	LAYGDNSEFIK;SVEPAPKDPILGVTEAFLADPSPEK
AT5G27670	AT5G27670.1	HISTONE H2A 7 (HTA7)	(H2A.W.7);HISTONE H2A 7 (HTA7)	Encodes HTA7, a histone H2A protein.		23.9897	23.4896	23.6969	20.7109	19.2909	21.7239	3.1502	1.67952	3	2	2	29.3	23.3	23.3	4.4258	13086000	16444000	17245000	257760	105860	665000	11502000	10928000	9110600	5238200	2624600	7656100	3	AGLQFPVGR;LLHGVTIASGGVLPNINPVLLPK;MESSQATTKPTR
AT3G48930	AT3G48930.1	EMBRYO DEFECTIVE 1080 (EMB1080)	RIBOSOMAL PROTEIN US17Z (US17Z);EMBRYO DEFECTIVE 1080 (EMB1080)	Nucleic acid-binding, OB-fold-like protein;(source:Araport11)		32.6151	31.8282	32.5172	28.9613	29.0826	29.5203	3.13212	3.35746	13	13	9	45	45	31.9	173.98	5167900000	5323100000	7795399999.999999	78494000	93830000	147830000	1759399999.9999998	1077100000	1699099999.9999998	169640000	116420000	229300000	126	CPFTGTVSIR;DYLHFVK;EAIDGAYVDK;EAIDGAYVDKK;EGDHIIIGQCR;EGDHIIIGQCRPLSK;HSNIPAHVSPCFR;KCPFTGTVSIR;RHSNIPAHVSPCFR;VIPAGSSSSFGK;VIPAGSSSSFGKK;VKEGDHIIIGQCR;VKEGDHIIIGQCRPLSK
AT2G32060	AT2G32060.3;AT2G32060.2;AT2G32060.1	RIBOSOMAL PROTEIN ES12Y (ES12Y)	RIBOSOMAL PROTEIN ES12Y (ES12Y)	Ribosomal protein L7Ae/L30e/S12e/Gadd45 family protein;(source:Araport11)		22.6063	23.3063	23.0614	25.8447	25.8882	26.0846	-2.94782	2.9838	2	2	1	19.4	19.4	12.5	47.771	5015800	14482000	11101000	9049900	10250000	13662000	15131000	21902000	18806000	40049000	39391000	45967000	6	NAQLCVLAEDCNQPDYVK;TLGEWAGLCK
AT1G49670	AT1G49670.1;AT1G49670.2	(NQR)	(NQR)	molecular function has not been defined. Was shown involved in oxidative stress tolerance.		25.086	25.2974	25.1694	24.7238	19.7921	21.7457	3.09711	1.08848	2	2	2	6	6	6	21.338	27979000	57571000	47855000	0	0	0	21645000	24572000	32764000	0	0	0	8	IIYAGVNASDVNFSSGR;LPFDAGFEGVGLIAAVGESVK
AT1G76680	AT1G76680.1;AT1G76680.2	12-OXOPHYTODIENOATE REDUCTASE 1 (OPR1)	12-OXOPHYTODIENOATE REDUCTASE 1 (OPR1)	Encodes a member of an alpha/beta barrel fold family of FMN-containing oxidoreductases. One of the closely related 12-oxophytodienoic acid reductases. This enzyme is not expected to participate in jasmonic acid biosynthesis because during in vitro assays, it shows very little activity with the naturally occurring OPDA isomer. Shows activity towards 2,4,6-trinitrotoluene. Expressed predominately i…		26.152	25.8383	26.0489	24.6784	20.1697	23.9019	3.09637	1.10937	6	6	6	23.9	23.9	23.9	22.711	58574000	83757000	88041000	0	0	3009200	23283000	18282000	22760000	0	0	8859300	20	FQVDAPLNK;GTFISAGGFTR;RLGIEEIPGIVNDFR;SNGIDEALFTPPR;TDEYGGSLQNR;TTPGGFLITEATGVSDTAQGYQDTPGIWTK
AT2G32920	AT2G32920.1	PDI-LIKE 2-3 (PDIL2-3)	PDI-LIKE 2-3 (ATPDIL2-3);PROTEIN DISULFIDE ISOMERASE 9 (PDI9);ARABIDOPSIS THALIANA PROTEIN DISULFIDE ISOMERASE 9 (ATPDI9);PDI-LIKE 2-3 (PDIL2-3)	Encodes a protein disulfide isomerase-like (PDIL) protein, a member of a multigene family within the thioredoxin (TRX) superfamily. Transcript levels for this gene are up-regulated in response to three different chemical inducers of ER stress (dithiothreitol, beta-mercaptoethanol, and tunicamycin). AtIRE1-2 does not appear to be required for this response, but the atbzip60 mutant has a diminished…		24.0519	24.6937	24.5631	26.9841	26.0157	27.3797	-2.35693	2.12751	3	3	3	9.5	9.5	9.5	13.905	13662000	37886000	31435000	19937000	11197000	33525000	8491200	10911000	10950000	66450000	55402000	95950000	7	APIDYQGAR;GVATVAAIDADAHQSAAQDYGIK;SSPYPYEGAR
AT3G09350	AT3G09350.1;AT3G09350.4;AT3G09350.3;AT3G09350.2	FES1A (Fes1A)	FES1A (Fes1A)	Encodes one of the Arabidopsis orthologs of the human Hsp70-binding protein 1 (HspBP-1) and yeast Fes1p: Fes1A (AT3G09350), Fes1B (AT3G53800), Fes1C (AT5G02150). Fes1A is cytosolic and associates with cytosolic Hsp70. Mutants showed increased heat-sensitive phenotype suggestion the involvement of Fes1A in acquired thermotolerance. Does not have nucleotide exchange factor activity in vitro.		24.3642	28.4322	28.4844	23.3959	24.5563	24.0514	3.09244	1.13978	3	3	3	14.9	14.9	14.9	54.297	16964000	505670000	476270000	1657600	4071600	3337800	44543000	139730000	144380000	79968000	116470000	93912000	7	ALNLLQYLLQEDDSDR;GLVVLPGEDALPPDVASKLFEPPLR;WSLSHADGTRPTR
AT2G33150	AT2G33150.1	PEROXISOMAL 3-KETOACYL-COA THIOLASE 3 (PKT3)	PEROXISOMAL 3-KETOACYL-COA THIOLASE 3 (PKT3);PEROXISOME DEFECTIVE 1 (PED1);3-KETOACYL-COA THIOLASE 2 (KAT2);POTASSIUM CHANNEL IN ARABIDOPSIS THALIANA 2 (KAT2)	Encodes an organellar (peroxisome, glyoxysome) 3-ketoacyl-CoA thiolase, involved in fatty acid b-oxidation during germination and subsequent seedling growth. Mutants have defects in glyoxysomal fatty acid beta-oxidation. EC2.3.1.16 thiolase.		26.7134	26.8948	26.4853	25.5569	26.2185	26.2881	0.676671	1.38705	3	3	3	8.7	8.7	8.7	47.41	86437000	174210000	119140000	7413200	12887000	15732000	60310000	76930000	64282000	35879000	50007000	43702000	30	DTYPDDLLAPVLR;GNFKDTYPDDLLAPVLR;TNLNPSEVGDIVVGTVLAPGSQR
AT2G33210	AT2G33210.2;AT2G33210.1	HEAT SHOCK PROTEIN 60-2 (HSP60-2)	HEAT SHOCK PROTEIN 60-2 (HSP60-2); (HSP60)	Involved in the RNA splicing of rpl2 and ccmFC introns in mitochondria.		20.9223	22.5052	21.1479	24.4321	22.7972	24.622	-2.42534	1.7627	6	1	1	16.6	4.5	4.5	9.0954	0	0	0	3399600	0	0	0	0	0	19561000	0	0	2	EGVITIQDGK;GVEDLADAVK;LLEQDNPDLGYDAAK;QVANATNDVAGDGTTCATVLTR;TALVDAASVSSLLTTTEAVVTEIPTK;TLFNELEVVEGMK
AT3G52500	AT3G52500.1	0	0	Eukaryotic aspartyl protease family protein;(source:Araport11)		27.5956	27.435	27.3365	23.6035	24.5212	25.0031	3.07977	2.12825	4	4	4	15.6	15.6	15.6	148.37	159330000	253320000	214930000	1914200	3973800	6456000	81037000	87022000	79452000	3844300	6132800	8579300	39	GDVTVPELIFEFK;TPGLTYTPFR;TVNPSGGTGPAIILGSFQQQNYLVEYDLENDR;YLCSGCDFSGLDPTLIPR
AT2G33450	AT2G33450.1	PLASTID RIBOSOMAL PROTEIN L28 (PRPL28)	PLASTID RIBOSOMAL PROTEIN L28 (PRPL28);RIBOSOMAL PROTEIN BL28C (BL28C)	Ribosomal L28 family;(source:Araport11)		25.3885	25.4266	25.2732	24.2495	24.64	24.408	0.930282	2.44142	3	3	3	14.7	14.7	14.7	4.9199	34505000	62966000	51425000	2995400	4314900	4273800	34556000	29098000	25688000	12938000	15368000	13532000	9	ICPFTGK;VSFSNHK;VWWEAGK
AT3G06720	AT3G06720.2;AT3G06720.1	IMPORTIN ALPHA ISOFORM 1 (IMPA-1)	(AT-IMP); (ATKAP ALPHA);IMPORTIN ALPHA (AIMP ALPHA);IMPORTIN ALPHA ISOFORM 1 (IMPA-1);IMPORTIN ALPHA ISOFORM 1 (IMPA1)	Encodes importin alpha involved in nuclear import. Protein interacts with Agrobacterium proteins VirD2 and VirE2. Is not individually essential for Agrobacterium-mediated root transformation, but when overexpressed can rescue the impa-4 decreased transformation susceptibility phenotype.		25.5931	25.8315	26.2984	22.5007	23.0805	22.9501	3.06388	3.69276	4	4	3	13.7	13.7	10.7	38.437	39762000	83363000	104660000	891250	1463900	1555800	20651000	28166000	26794000	7001500	9260900	8077300	18	EAAWAISNATSGGSHDQIK;EQAVWALGNVAGDSPR;IENLQSHDNNEIYEK;VVIDHNAVPIFVQLLASPSDDVR
AT3G07110	AT3G07110.1;AT3G07110.2	RIBOSOMAL PROTEIN UL13Z (UL13Z)	RIBOSOMAL PROTEIN UL13Z (UL13Z); (RPL13AA)	Ribosomal protein L13 family protein;(source:Araport11)		32.5424	32.6007	32.7456	29.3915	29.832	29.534	3.04369	3.78173	11	11	5	47.1	47.1	25.2	267.66	4913700000	9092800000	9132300000	105770000	157730000	149240000	1828799999.9999998	1718599999.9999998	2099599999.9999998	182820000	255220000	189700000	217	CEEICLSGGLVR;DLLNGQNIVVVR;LGSQLDVLAPVK;LGSQLDVLAPVKY;LKVFEGVPTPYDK;LSSEVGWNHYDTIK;LSSEVGWNHYDTIKELENK;MNTKPSHGPIHFR;MVVPDALK;RVVVDAR;VFEGVPTPYDK
AT2G34420	AT2G34420.1	PHOTOSYSTEM II LIGHT HARVESTING COMPLEX GENE B1B2 (LHB1B2)	PHOTOSYSTEM II LIGHT HARVESTING COMPLEX GENE B1B2 (LHB1B2);PHOTOSYSTEM II LIGHT HARVESTING COMPLEX GENE 1.5 (LHCB1.5)	Photosystem II type I chlorophyll a/b-binding protein		31.7082	31.1085	31.7483	32.2423	31.9312	32.4608	-0.689768	1.52043	9	1	0	72.5	4.5	0	28.935	2756100000	3232299999.9999995	4574800000	762990000	675820000	1134900000	3960699999.9999995	2806100000	4124599999.9999995	4559200000	3487599999.9999995	4636700000	27	AGSQIFSDGGLDYLGNPSLVHAQSILAIWATQVILMGAVEGYR;ELEVIHSR;FGEAVWFK;GPLENLADHLADPVNNNAWAFATNFVPGK;GPSGSPWYGSDR;NRELEVIHSR;VAGDGPLGEAEDLLYPGGSFDPLGLATDPEAFAELK;WAMLGALGCVFPELLAR;YLGPFSGEPPSYLTGEFPGDYGWDTAGLSADPETFAR
AT2G34430	AT2G34430.1	LIGHT-HARVESTING CHLOROPHYLL-PROTEIN COMPLEX II SUBUNIT B1 (LHB1B1)	LIGHT-HARVESTING CHLOROPHYLL-PROTEIN COMPLEX II SUBUNIT B1 (LHCB1.4); (DEG11);LIGHT-HARVESTING CHLOROPHYLL-PROTEIN COMPLEX II SUBUNIT B1 (LHB1B1)	Photosystem II type I chlorophyll a/b-binding protein The mRNA is cell-to-cell mobile.		32.4775	31.9059	32.2212	32.6304	32.2932	32.4241	-0.247736	0.851579	10	10	2	74.4	74.4	6.8	219.44	4697600000	5617600000	6349599999.999999	998540000	868620000	1106400000	1861499999.9999998	1574899999.9999998	1517399999.9999998	1803299999.9999998	1356500000	1582099999.9999998	202	AGSQIFSDGGLDYLGNPSLVHAQSILAIWATQVILMGAVEGYR;ASKPTGPSGSPWYGSDR;ELEVIHSR;FGEAVWFK;GPLENLADHLADPVNNNAWAFATNFVPGK;KASKPTGPSGSPWYGSDR;NRELEVIHSR;VAGDGPLGEAEDLLYPGGSFDPLGLATDPEAFAELK;WAMLGALGCVFPELLAR;YLGPFSGEPPSYLTGEFPGDYGWDTAGLSADPETFAR
AT4G31700	AT4G31700.1	RIBOSOMAL PROTEIN S6 (RPS6)	RIBOSOMAL PROTEIN S6 (RPS6); (RPS6A); (ATRPS6);RIBOSOMAL PROTEIN ES6Z (ES6Z)	Encodes a putative ribosomal protein S6 (rps6a). RPS6A and RPS6B are fully redundant and essential during gametogenesis.		25.9297	25.5814	25.4882	21.7549	23.8073	22.3256	3.03716	1.77987	11	3	0	32	9.2	0	247.13	5234400000	4972700000	8628600000	80166000	194030000	180490000	5384700000	2821700000	5147500000	420220000	781470000	602740000	61	FNVANPTTGCQK;GCIVSPDLSVLNLVIVK;GENDLPGLTDTEKPR;KGENDLPGLTDTEKPR;KLEIDDDQK;KLEIDDDQKLR;LEIDDDQK;LEIDDDQKLR;LVTPLTLQR;QGVLTPGR;TYVNTYR
AT5G40950	AT5G40950.1	RIBOSOMAL PROTEIN LARGE SUBUNIT 27 (RPL27)	RIBOSOMAL PROTEIN LARGE SUBUNIT 27 (RPL27);RIBOSOMAL PROTEIN BL27C (BL27C); (PRPL27)	ribosomal protein large subunit 27;(source:Araport11)		29.1913	28.0494	28.5674	25.2762	25.0063	26.432	3.03121	2.49271	4	4	4	23.2	23.2	23.2	37.291	481550000	387830000	504480000	6102700	5562300	17382000	319290000	206050000	256210000	44022000	34652000	45990000	36	DHTIFSLIDGLVK;EIVPENPNSYR;IYGDQVAKPGAIIVR;KISVYPR
AT3G55610	AT3G55610.2;AT3G55610.1;AT2G39800.2;AT2G39800.3;AT2G39800.4;AT2G39800.1	DELTA 1-PYRROLINE-5-CARBOXYLATE SYNTHASE 2 (P5CS2)	DELTA 1-PYRROLINE-5-CARBOXYLATE SYNTHASE 2 (P5CS2)	encodes delta 1-pyrroline-5-carboxylate synthetase B. Gene expression is induced by dehydration, high salt and ABA. Knock-out mutations in P5CS2 are embryo-lethal. P5CS2 appears to be present in different cells and/or different subcellular locations from P5CS1 in a tissue-dependent manner. Mutants are defective in pollen development.		26.5681	26.0949	26.904	23.2375	23.6187	23.629	3.02725	3.19911	3	3	3	7.4	7.4	7.4	6.2806	78158000	100060000	159260000	1485300	0	2490700	76551000	29532000	88487000	48777000	0	53494000	3	EEIPDLLKLDDVIDLVIPR;VIPVFNENDAISTR;VITDAIPETVGGK
AT1G43170	AT1G43170.9;AT1G43170.8;AT1G43170.7;AT1G43170.6;AT1G43170.5;AT1G43170.3;AT1G43170.2;AT1G43170.1;AT1G43170.4	RIBOSOMAL PROTEIN 1 (RP1)	RIBOSOMAL PROTEIN 1 (ARP1);EMBRYO DEFECTIVE 2207 (emb2207); (RPL3A);RIBOSOMAL PROTEIN 1 (RP1);RIBOSOMAL PROTEIN UL3Z (UL3Z)	Encodes a cytoplasmic ribosomal protein. The mRNA is cell-to-cell mobile.		34.1879	33.5124	34.1321	30.8322	31.1311	30.7921	3.02563	3.20523	32	32	24	63	63	50.9	323.31	15373000000	17106000000	23877000000	287110000	388150000	356970000	2370000000	1617999999.9999998	2395500000	152190000	160470000	112950000	665	AFPKDDQTKPCK;AGMTHIVR;AHMMEIQINGGTIAQK;DDYLMIK;DEMIDIIGVTK;DVTPMGGFPHYGIVK;DVTPMGGFPHYGIVKDDYLMIK;ETCEAVTIIETPAMVVVGVVAYVK;FIDTASIFGHGR;FQTSLEK;FTAFMGYK;GIQAQLEK;GKGYEGVVTR;GYEGVVTR;HGSLGFLPR;KAHMMEIQINGGTIAQK;KGIQAQLEK;KVACIGAWHPAR;KYATVIR;LALEEIK;QIPIEAVFQK;QIPIEAVFQKDEMIDIIGVTK;QSLLTQTSR;SLNTVWAQHLSEEVR;SLNTVWAQHLSEEVRR;TEKDVTPMGGFPHYGIVK;TEKDVTPMGGFPHYGIVKDDYLMIK;VACIGAWHPAR;VDFAYSFFEK;VGTEAH…
AT5G59720	AT5G59720.1	HEAT SHOCK PROTEIN 18.2 (HSP18.2)	HEAT SHOCK PROTEIN 18.2 (HSP18.2)	encodes a low molecular weight heat shock protein that contains the heat shock element in the promoter region. Expression is induced in response to heat shock.		29.6097	29.4304	29.4904	26.6305	25.6035	27.2872	3.00313	1.91191	13	10	9	55.3	46	39.8	323.31	643560000	1010099999.9999999	956480000	15603000	8414100	31443000	283650000	223220000	212410000	32336000	14838000	26592000	80	ADLPGLKK;ATMENGVLTVVVPK;DVAAFTNAR;EEVKVEVEDK;EEVKVEVEDKNVLQISGER;ETPEAHVFK;FRLPENAK;KEEVKVEVEDK;NVLQISGER;SIDISGAN;SLIPSIFGGR;VDWKETPEAHVFK;VEVEDKNVLQISGER
AT2G36530	AT2G36530.2;AT2G36530.1	LOW EXPRESSION OF OSMOTICALLY RESPONSIVE GENES 2 (LOS2)	LOW EXPRESSION OF OSMOTICALLY RESPONSIVE GENES 2 (LOS2);CYTOSOLIC ENOLASE (ENOC);ENOLASE 2 (ENO2)	Involved in light-dependent cold tolerance and encodes an enolase. Protein is tyrosine-phosphorylated and its phosphorylation state is modulated in response to ABA in Arabidopsis thaliana seeds. Affects seed size and weight by adjusting cytokinin content and forming ENO2-bZIP75 complex. The los2 mutant has an autoimmune response through a perturbation of glycolysis from the reduction of the enola…		27.4689	28.4632	28.1596	29.0561	29.5011	28.7306	-1.06532	1.61325	12	12	12	48	48	48	281.52	145930000	516660000	380260000	83827000	125400000	85513000	83091000	121220000	90614000	206790000	262930000	123720000	80	AGAVVSGIPLYK;AVGNVNNIIGPALIGK;DPTQQTAIDNFMVHELDGTQNEWGWCK;IEEELGSEAIYAGVNFR;SCNALLLK;SFVAEYPIVSIEDPFDQDDWEHYAK;SGETEDTFIADLAVGLSTGQIK;VNQIGSVTESIEAVK;VTAAVPSGASTGIYEALELR;VVIGMDVAASEFYSEDK;YGQDATNVGDEGGFAPNIQENK;YGQDATNVGDEGGFAPNIQENKEGLELLK
AT2G36580	AT2G36580.1	0	0	Pyruvate kinase family protein;(source:Araport11)		24.4456	23.4705	23.1983	24.1864	23.8856	23.9935	-0.317045	0.608085	3	3	1	11.2	11.2	4.6	22.919	0	16227000	12206000	0	2557800	3206600	0	10041000	8739100	0	11942000	11908000	4	AEATDVANAVLDGSDAILLGAETLR;IENEEGLTHFDEILQEADGIILSR;WSFSGAFEAR
AT2G36880	AT2G36880.2;AT2G36880.1	METHIONINE ADENOSYLTRANSFERASE 3 (MAT3)	METHIONINE ADENOSYLTRANSFERASE 3 (MAT3)	Topoisomerase VI physically interacts with S-adenosylmethionine synthase methionine adenosyl transferase 3 (MAT3), which is required for H3K9me2. A Topoisomerase VI defect affects MAT3 occupancy on heterochromatic elements and its exclusion from euchromatic islands, thereby providing a possible mechanistic explanation to the essential role of Topoisomerase VI in the delimitation of chromatin doma…		27.235	27.9111	27.8465	27.3118	27.6243	27.4584	0.199332	0.635634	16	9	6	42.8	26.4	19.5	56.583	124090000	352360000	306060000	25021000	34146000	35406000	53936000	73825000	63675000	47979000	52716000	43238000	44	DDPDFTWEVVKPLK;DDPDFTWEVVKPLKPK;EHVIKPVIPAK;EIGFISADVGLDADK;FVIGGPHGDAGLTGR;IIIDTYGGWGAHGGGAFSGK;IIIDTYGGWGAHGGGAFSGKDPTK;KIIIDTYGGWGAHGGGAFSGK;KIIIDTYGGWGAHGGGAFSGKDPTK;METFLFTSESVNEGHPDK;NDGGAMIPIR;TAAYGHFGR;TAAYGHFGRDDPDFTWEVVKPLK;TCPWLRPDGK;TGTIPDKDILVLIK;VHTVLISTQHDETVTNDEIAADLK
AT2G37170	AT2G37170.1;AT2G37170.2	0	0	a member of the plasma membrane intrinsic protein subfamily PIP2. localizes to the plasma membrane and exhibits water transport activity in Xenopus oocyte. expressed specifically in the vascular bundles and protein level increases slightly during leaf dev		24.6656	23.3689	23.3702	24.1783	24.6731	25.1917	-0.879501	1.05332	4	2	2	20.4	4.6	4.6	11.115	20905000	15124000	0	2851200	4415100	7357600	24867000	17731000	0	20108000	23253000	26732000	2	AKDVEGPEGFQTR;DSHVPVLAPLPIGFAVFMVHLATIPITGTGINPAR;DVEGPEGFQTR;SFGAAVIYNK
AT1G01300	AT1G01300.1	0	0	Eukaryotic aspartyl protease family protein;(source:Araport11)		26.481	25.8683	26.6848	23.009	21.9045	25.1226	2.99931	1.40851	3	3	3	11.1	11.1	11.1	113.29	73577000	85519000	136810000	0	647910	0	47837000	27691000	55580000	0	3694400	0	19	LDQIGNGGVIIDSGTSVTR;PGGFSSSVVSGLSQGSGEYFTR;TYATIPCSSPHCR
AT2G20560	AT2G20560.1;AT2G20550.2;AT2G20550.1	DNAJ PROTEIN (DNAJ)	DNAJ PROTEIN (DNAJ)	DNAJ heat shock family protein;(source:Araport11)		23.1371	25.4256	25.1646	20.1536	22.3922	22.2039	2.99254	1.67313	2	2	2	13.4	13.4	13.4	15.059	7246600	62922000	47695000	0	0	0	11810000	35274000	28286000	0	0	0	6	GNEQPGVIPADLVFIIDEKPHPVFTR;LTIPVTNVVHPEYEEVVPK
AT2G37600	AT2G37600.2;AT2G37600.1	RIBOSOMAL PROTEIN L36A (RPL36A)	RIBOSOMAL PROTEIN L36A (RPL36A);RIBOSOMAL PROTEIN EL36Z (EL36Z)	cytosolic ribosomal protein gene, part of eL36 familyl		24.4566	22.8874	23.6403	22.1223	24.4635	21.5435	0.951681	0.685468	4	1	1	25.7	8.8	8.8	-2	18086000	10832000	16582000	0	0	0	0	0	0	0	0	0	0	EEMSSVLR;EVAGMAPYEK;KREEMSSVLR;TGLFVGLNK
AT3G53750	AT3G53750.2;AT3G53750.1;AT2G37620.4;AT2G37620.3;AT2G37620.2;AT2G37620.1	ACTIN 3 (ACT3)	ACTIN 3 (ACT3)	Member of the Actin gene family. Expressed in mature pollen.		27.1909	25.6029	27.5661	26.9373	26.863	26.6282	-0.0228992	0.312794	10	4	3	37.4	17.5	13.3	39.611	120350000	71146000	252000000	19300000	20145000	19914000	84380000	61101000	90815000	61452000	104830000	82184000	20	ADGEDIQPLVCDNGTGMVK;AEYDESGPSIVHR;AGFAGDDAPR;DAYVGDEAQSK;HTGVMVGMGQK;IWHHTFYNELR;LCYIALDYEQELETAK;NYELPDGQVITIGSER;VAPEEHPILLTEAPLNPK;YPIEHGIVNNWDDMEK
AT2G37660	AT2G37660.1	0	0	NAD(P)-binding Rossmann-fold superfamily protein;(source:Araport11)		24.0604	24.9663	24.3239	26.8556	26.9233	26.7988	-2.40907	2.25345	6	6	6	34.5	34.5	34.5	91.568	13743000	45764000	26632000	18238000	21005000	22414000	10485000	19975000	13486000	58972000	64628000	50629000	12	ADVAEVCVQALQLEEAK;ALDLASKPEGTGTPTK;DTASIAPAVEGIDALVILTSAVPQMKPGFDPSK;ELLVGKDDELLETETR;GGRPEFFFDDGAYPEQVDWIGQK;SEQFVAR
AT2G38040	AT2G38040.2;AT2G38040.1	ACETYL CO-ENZYME A CARBOXYLASE CARBOXYLTRANSFERASE ALPHA SUBUNIT (CAC3)	ACETYL CO-ENZYME A CARBOXYLASE CARBOXYLTRANSFERASE ALPHA SUBUNIT (CAC3)	encodes the carboxyltransferase alpha subunit of acetyl-CoA carboxylase, involved in de novo fatty acid biosynthesis		26.6053	26.8922	26.4596	26.2785	26.4434	26.8225	0.137551	0.567753	8	8	8	13.4	13.4	13.4	34.767	80197000	173890000	117040000	12225000	15061000	22785000	36554000	43573000	27163000	32658000	36802000	34366000	15	AEVASSGASSFDELPDALK;AGYDDPAIVTGIGTIDGK;DLYTHLTPIQR;DTAEQIYAANENLQEK;FQEAVDRPEIR;IAEALNTSGLQEK;IGVFIEGEPIEPSR;KIGVFIEGEPIEPSR
AT2G38140	AT2G38140.1	PLASTID-SPECIFIC RIBOSOMAL PROTEIN 4 (PSRP4)	PLASTID-SPECIFIC RIBOSOMAL PROTEIN 4 (PSRP4);RIBOSOMAL PROTEIN BTHXC (BTHXC)	plastid-specific ribosomal protein 4 (PSRP4) mRNA, complete The mRNA is cell-to-cell mobile.		25.7191	25.4369	25.7205	28.1248	28.6693	27.8601	-2.59258	2.74036	2	2	2	17.8	17.8	17.8	10.954	43391000	63415000	70120000	43959000	70456000	46774000	65654000	57878000	66427000	205950000	269250000	150040000	19	IKIDIDESLFSN;VPVPPAPPR
AT2G38540	AT2G38540.1	LIPID TRANSFER PROTEIN 1 (LP1)	LIPID TRANSFER PROTEIN 1 (LP1);LIPID TRANSFER PROTEIN 1 (LTP1);ARABIDOPSIS THALIANA LIPID TRANSFER PROTEIN 1 (ATLTP1); (ATLTPI-4)	Non-specific lipid transfer protein. Binds calmodulin in a Ca2+-independent manner. Localized to the cell wall. Specifically expressed in L1 epidermal layer. Predicted to be a member of PR-14 pathogenesis-related protein family with the following members: At2g38540/LTP1, At2g38530/LTP2, At5g59320/LTP3, At5g59310/LTP4, At3g51600/LTP5, At3g08770/LTP6, At2g15050/LTP7, At2g18370/LTP8, At2g15325/LTP9,…		23.7477	24.3666	24.1322	27.6217	27.5811	27.6435	-3.53328	2.92348	2	2	2	16.1	16.1	16.1	6.2352	11065000	30199000	23319000	0	33139000	40253000	48723000	67932000	58615000	0	87804000	111290000	5	ACGVNIPYK;ALGSGLNAGR
AT3G49870	AT3G49870.2;AT3G49870.1	ADP-RIBOSYLATION FACTOR-LIKE A1C (ARLA1C)	ADP-RIBOSYLATION FACTOR-LIKE A1C (ATARLA1C);ADP-RIBOSYLATION FACTOR-LIKE 8A (ARL8A);ADP-RIBOSYLATION FACTOR-LIKE A1C (ARLA1C)	A member of ARF-like GTPase family. A thaliana has 21 members, in two subfamilies, ARF and ARF-like (ARL) GTPases.		23.5799	23.2155	24.3424	21.0452	21.5136	19.6238	2.98506	2.0665	3	1	1	26.7	12.7	12.7	18.273	9849800	13598000	26976000	0	0	0	9967100	7743900	15941000	0	0	0	5	AVSAIVYVVDAADPDNLSVSK;NSTNIDQVIDWLVK;SELHDLLSK
ATCG00740	ATCG00740.1	RNA POLYMERASE SUBUNIT ALPHA (RPOA)	RNA POLYMERASE SUBUNIT ALPHA (RPOA)	RNA polymerase alpha subunit		23.5787	23.113	24.7132	21.0911	19.1193	22.2412	2.98443	1.50839	2	2	2	8.5	8.5	8.5	4.9629	9841900	12666000	34881000	0	0	0	13809000	13897000	19976000	0	0	0	7	ALLGEIEGTCITR;NALICVQGPGYITAR
AT1G80480	AT1G80480.1	PLASTID TRANSCRIPTIONALLY ACTIVE 17 (PTAC17)	PLASTID TRANSCRIPTIONALLY ACTIVE 17 (PTAC17)	plastid transcriptionally active 17;(source:Araport11)		24.3527	24.4314	24.2024	22.3646	20.5749	21.2125	2.94486	1.84582	2	2	2	7	7	7	17.58	16829000	31587000	24482000	0	0	0	15359000	17601000	15787000	0	0	0	5	FVFQGVHDIFQGSPDR;TDLVGEAELGSVVQR
AT2G39310	AT2G39310.2;AT2G39310.4;AT2G39310.3;AT2G39310.1	JACALIN-RELATED LECTIN 22 (JAL22)	JACALIN-RELATED LECTIN 22 (JAL22)	jacalin-related lectin 22;(source:Araport11)		25.0665	25.5844	25.0269	26.5638	26.3534	26.6045	-1.28127	2.31491	4	4	4	20.3	20.3	20.3	22.884	27603000	70244000	43353000	14898000	14150000	19589000	20969000	26707000	18305000	47997000	45627000	41148000	11	EDAAIDALGAYFGPVPTPTPLIPSK;ILVGQGNDGVSFVK;IVGFHGQASDVVHSIGVTIVPITTTE;KLPAIGGNEGVTWDDGVYDGVR
AT3G52580	AT3G52580.1	RIBOSOMAL PROTEIN US11X (US11X)	RIBOSOMAL PROTEIN US11X (US11X)	Ribosomal protein S11 family protein;(source:Araport11)		31.9554	31.4722	31.9024	28.8027	28.428	29.2675	2.94397	3.23292	9	9	2	48	48	14	146.74	3271299999.9999995	4159099999.9999995	5090700000	70322000	59604000	124070000	3067299999.9999995	2472300000	3263199999.9999995	299560000	242090000	339590000	117	ADRDESSPYAAMLAAQDVAQR;DESSPYAAMLAAQDVAQR;ELGITAIHVK;IEDVTPIPTDSTR;IEDVTPIPTDSTRR;IGRIEDVTPIPTDSTR;TPGPGAQSALR;VENVTLGPAVR;VKADRDESSPYAAMLAAQDVAQR
AT3G55280	AT3G55280.3;AT3G55280.2;AT3G55280.1;AT2G39460.2;AT2G39460.1	RIBOSOMAL PROTEIN L23AB (RPL23AB)	RIBOSOMAL PROTEIN UL23Y (UL23Y);RIBOSOMAL PROTEIN L23A2 (RPL23A2);RIBOSOMAL PROTEIN L23AB (RPL23AB)	60S ribosomal protein L23A (RPL23aB). Paralog of RPL23aA and functionally redundant to it.		28.9733	28.4037	28.2637	27.5425	27.968	28.0718	0.686133	1.45988	6	6	6	33.8	33.8	33.8	27.509	414000000	495790000	408700000	29359000	43332000	54165000	365840000	247020000	230380000	109550000	171570000	124920000	40	IEDNNTLVFIVDIR;KIEDNNTLVFIVDIR;KVNTLIRPDGTK;LDHYQILK;LTPDYDALDVANK;NKLDHYQILK
AT2G39730	AT2G39730.1;AT2G39730.3;AT2G39730.2	RUBISCO ACTIVASE (RCA)	RUBISCO ACTIVASE (RCA)	Rubisco activase, a nuclear-encoded chloroplast protein that consists of two isoforms arising from alternative splicing in most plants. Required for the light activation of rubisco. Involved in jasmonate-induced leaf senescence.		31.5363	31.2646	31.2589	30.7266	31.0049	30.3694	0.652949	1.58726	17	17	17	46.6	46.6	46.6	323.31	2446600000	3601599999.9999995	3258699999.9999995	266850000	355630000	266300000	820190000	864350000	824840000	425770000	722790000	226380000	233	EGPPVFEQPEMTYEK;FVESLGVEK;GAQQVNLPVPEGCTDPVAENFDPTAR;GLAYDTSDDQQDITR;IKDEDIVTLVDQFPGQSIDFFGALR;KFVESLGVEK;MCCLFINDLDAGAGR;MGINPIMMSAGELESGNAGEPAK;NFLTLPNIK;SDDGTCVYNF;SFQCELVMAK;TDKIKDEDIVTLVDQFPGQSIDFFGALR;VPIICTGNDFSTLYAPLIR;VPLILGIWGGK;VQLAETYLSQAALGDANADAIGR;VYDDEVR;VYDDEVRK
AT2G39770	AT2G39770.3;AT2G39770.2;AT2G39770.1	CYTOKINESIS DEFECTIVE 1 (CYT1)	CYTOKINESIS DEFECTIVE 1 (CYT1);VITAMIN C DEFECTIVE 1 (VTC1);SENSITIVE TO OZONE 1 (SOZ1);EMBRYO DEFECTIVE 101 (EMB101);GDP-MANNOSE PYROPHOSPHORYLASE 1 (GMP1)	Encodes a GDP-mannose pyrophosphorylase/ mannose-1-pyrophosphatase. This enzyme provides GDP-mannose, which is used for cell wall carbohydrate biosynthesis and protein glycosylation as well as for ascorbate (vitamin C) biosynthesis. Mutations in this gene confer hypersensitivity to NH4+.		22.4577	22.514	22.8667	23.8473	23.8093	23.492	-1.10339	2.809	2	2	2	10.2	10.2	10.2	9.0344	4524900	8362200	9699800	2266600	2426100	0	6852500	7234800	7938500	15112000	14529000	0	2	DKLLDGSGEPFFVLNSDVISEYPLK;YGVVVMEESTGR
AT3G55750	AT3G55750.1;AT1G74270.1	RIBOSOMAL PROTEIN EL33X (EL33X)	RIBOSOMAL PROTEIN EL33X (EL33X)	Ribosomal protein L35Ae family protein;(source:Araport11)		27.7465	27.2203	26.8234	22.8205	24.3857	25.8243	2.91991	1.47376	3	1	1	40.5	22.5	22.5	157.56	176890000	218300000	150600000	0	0	11407000	150110000	121970000	222650000	0	0	45699000	18	FTSNLPPK;SNQYPNTSLVQIEGVNTQEEVNWYK;VTRPHGNSGVVR
AT2G40100	AT2G40100.2;AT2G40100.1	LIGHT HARVESTING COMPLEX PHOTOSYSTEM II (LHCB4.3)	LIGHT HARVESTING COMPLEX PHOTOSYSTEM II (LHCB4.3); (LHCB8)	Lhcb4:3 protein (Lhcb4.3, light harvesting complex of photosystem II The mRNA is cell-to-cell mobile.		23.3229	22.6844	23.0054	21.7027	21.828	24.719	0.254321	0.386148	2	1	1	20	14.6	14.6	6.3512	8242800	9410700	10678000	0	0	0	11549000	8401100	9870600	0	0	0	3	FRECELIHGR;GFDPFGLGKPAEYLQYDFDGLDQNLAK
AT2G40290	AT2G40290.1;AT2G40290.3;AT2G40290.2	0	0	Encodes an eIF2alpha homolog that can be phosphorylated by GCN2 in vitro.		24.0652	24.0721	23.5174	23.7456	24.4797	23.9441	-0.17151	0.536086	2	2	2	7.3	7.3	7.3	7.1896	13789000	24623000	15228000	2112300	0	3098500	10612000	11668000	11972000	12237000	0	7161500	4	AIAACTETIETHK;VSEEDIQTCEER
AT2G39990	AT2G39990.1	EUKARYOTIC TRANSLATION INITIATION FACTOR 2 (EIF2)	EUKARYOTIC TRANSLATION INITIATION FACTOR 2 (EIF2);ARABIDOPSIS THALIANA EUKARYOTIC TRANSLATION INITIATION FACTOR 3 SUBUNIT F (AteIF3f);EUKARYOTIC TRANSLATION INITIATION FACTOR 3 SUBUNIT F (eIF3F)	translation initiation factor eIF2 p47 subunit homolog		24.4323	24.6291	24.3911	22.765	22.8765	19.1058	2.90175	1.14436	2	2	2	10.9	10.9	10.9	32.226	17784000	36227000	27902000	0	0	0	14741000	19009000	12467000	0	0	0	7	QLVAHFQEIPVDLR;VIGTLLGSILPDGTVDIR
AT2G40660	AT2G40660.1	0	0	Nucleic acid-binding, OB-fold-like protein;(source:Araport11)		24.1095	25.2154	23.7601	25.4034	21.0853	25.8195	0.258929	0.355248	5	5	5	26.7	26.7	26.7	13.599	14219000	54389000	18017000	0	0	0	15262000	13925000	14476000	0	0	0	5	EELSTLFAPIPVK;HFSLDPEPFVGGAGESDIK;HPSADSLLVEEIDVGEDKVR;SVLLGNGLTPSAADVAVFSALHSSVLGLSDSDKEK;VSFSGIEGKPEDVLNPK
AT2G40840	AT2G40840.1	DISPROPORTIONATING ENZYME 2 (DPE2)	DISPROPORTIONATING ENZYME 2 (DPE2)	Encodes a cytosolic protein with transglucosidase and amylomaltase activity. It is an essential component of the pathway from starch to sucrose and cellular metabolism in leaves at night. The protein binds to heteroglycans and utilizes glucose, mannose and xylose as acceptors. Fucose and galactose can also act as acceptors but less efficiently than the previous three. It was also was also recentl…		22.9917	24.5754	24.4201	23.085	22.8606	23.5974	0.814718	0.914766	3	3	3	5.8	5.8	5.8	5.6675	6552000	34902000	28468000	1336300	1257000	2436600	8316300	11047000	11352000	11964000	10416000	13874000	6	LLVDWAVDSGLHLVQLLPVNDTSVHK;LVVPETLTGGESVHLR;SVPANVSGEDINK
AT2G23070	AT2G23070.1	CK2 ALPHA CP (CKA4)	CK2 ALPHA CP (CKA4); (CPCK2);CASEIN KINASE 2 (PCK2)	Encodes a chloroplast localized subunit of casien kinase4. Functions reduntantly with other alpha subunits (1, 2,and 3) in ABA mediated suppression of seed germination, lateral root development and flowering time.		26.2774	26.0989	26.4399	24.6256	24.4881	21.0071	2.89847	1.17675	5	5	3	16.2	16.2	10.2	25.202	63894000	100340000	115450000	0	3883700	0	41500000	36851000	44577000	0	17748000	0	19	FINSENQHLAVPEAVDFVDK;ILQNLCGGPNIVK;TPSLIFEHVNNK;VLGTDELNAYLNK;VLYPTLSDYDVR
AT2G41530	AT2G41530.1	S-FORMYLGLUTATHIONE HYDROLASE (SFGH)	S-FORMYLGLUTATHIONE HYDROLASE (SFGH);ARABIDOPSIS THALIANA S-FORMYLGLUTATHIONE HYDROLASE (AtSFGH)	Encodes a protein with S-formylglutathione hydrolase activity.		21.12	22.2271	20.7583	20.9383	23.6576	22.0832	-0.857949	0.688754	2	2	2	8.8	8.8	8.8	4.8296	1790300	6853800	0	0	0	0	3134900	4763800	0	0	0	0	2	AAWEEYDATCLISK;ASGLSEIGSTK
AT2G41740	AT2G41740.2;AT2G41740.1	VILLIN 2 (VLN2)	VILLIN 2 (VLN2); (ATVLN2)	Encodes a protein with high homology to animal villin.		23.9673	21.6565	22.3641	22.4255	22.0201	23.7485	-0.0687188	0.327716	3	3	3	4.1	4.1	4.1	6.1328	12884000	4615100	6846400	0	0	0	11724000	8612400	11544000	0	0	0	3	TVEEEVFETR;TVELDAVLGGR;VLDPAFQGAGQKPGTEIWR
AT2G41800	AT2G41800.1	TEEBE, LONG IN THE MAYO-YOREME LANGUAGE (TEB)	TEEBE, LONG IN THE MAYO-YOREME LANGUAGE (TEB)	Encodes a DUF642 cell wall protein that is highly induced during the M/G1 phases of the cell cycle and is involved in hypocotyl cell elongation.		26.8488	26.4965	26.2443	26.3503	25.9998	25.7243	0.505054	1.2376	6	6	6	33	33	33	30.195	94945000	132180000	100810000	12849000	11074000	10643000	41373000	37613000	40731000	36576000	36645000	27414000	23	IQDFISPLPGWIVESLKPVK;LGNLGTISQNVR;QIIGANSLPHWEIAGHVELVSGGPQPGGFYFPVPR;VPYGQGAVELVAGR;VSVPGQANELPLQTVFSSDGGDTYAWAFK;VTFHNPGVQEDR
AT1G78630	AT1G78630.1	EMBRYO DEFECTIVE 1473 (emb1473)	RIBOSOMAL PROTEIN UL13C (UL13C);EMBRYO DEFECTIVE 1473 (emb1473)	Ribosomal protein L13 family protein;(source:Araport11)		26.9202	24.3544	26.0828	23.7271	23.5256	21.4309	2.89124	1.58755	3	3	3	22.8	22.8	22.8	25.271	99762000	29945000	90133000	0	0	0	51261000	13572000	21192000	0	0	0	10	ASDHVNTDKPWFVVDATDK;GPDHPHEAQKPLDLPIR;HSGRPGGMTVETFDQLQQR
AT2G42520	AT2G42520.3;AT2G42520.2;AT2G42520.1	RNA HELICASE 37 (RH37)	RNA HELICASE 37 (RH37)	P-loop containing nucleoside triphosphate hydrolases superfamily protein;(source:Araport11)		27.1506	26.657	26.9461	24.2108	24.7998	23.1368	2.86876	1.98661	7	7	3	16.6	16.6	7.7	66.213	117040000	147730000	163970000	2916100	4820300	1770700	63778000	33134000	54575000	7546000	10238000	3836000	28	FLALDEADR;GLDIPHVAHVVNFDLPNDIDDYVHR;GVDILVATPGR;SGLATAFFNDGNTSLAR;VGSSTDLIVQR;VVVAYGGTPINQQLR;WAPGGSGVGVGGGGGYR
AT2G42500	AT2G42500.2;AT3G58500.1;AT2G42500.1;AT2G42500.3;AT2G42500.5;AT2G42500.4;AT1G59830.2;AT5G55260.1;AT4G26720.1;AT1G59830.1;AT1G10430.2;AT1G10430.1;AT1G69960.1;AT5G55260.2	PROTEIN PHOSPHATASE 2A-3 (PP2A-3)	PROTEIN PHOSPHATASE 2A-3 (PP2A-3);PROTEIN PHOSPHATASE 2A-4 (PP2A-4)	Encodes one of the isoforms of the catalytic subunit of protein phosphatase 2A: AT1G59830/PP2A-1, AT1G10430/PP2A-2, At2g42500/PP2A-3, At3g58500/PP2A-4 [Plant Molecular Biology (1993) 21:475-485 and (1994) 26:523-528; Note that in more recent publications, there is mixed use of gene names for PP2A-3 and PP2A-4 - some refer to At2g42500 as PP2A-3 and some as PP2A-4]. ACR4 phosphorylates the PROTEIN…		22.9433	22.489	23.9422	23.1143	24.5858	22.9852	-0.436927	0.560304	2	2	2	9.8	9.8	9.8	17.343	6335800	8218500	20441000	0	0	0	0	0	9562300	0	0	0	2	NHTFIQFEPAPR;QITQVYGFYDECLR
AT2G44210	AT2G44210.1;AT2G44210.2	0	0	carboxyl-terminal peptidase (DUF239);(source:Araport11)		25.0115	24.4853	24.9728	21.4281	22.2357	22.2258	2.86001	3.05635	2	2	2	4.8	4.8	4.8	9.5603	26570000	32790000	41760000	423760	0	0	22293000	15846000	21970000	7226100	0	0	7	FAEEGWGK;NVQVVDGSNELR
AT4G38580	AT4G38580.2;AT4G38580.1	FARNESYLATED PROTEIN 6 (FP6)	FARNESYLATED PROTEIN 6 (ATFP6);HEAVY METAL ASSOCIATED ISOPRENYLATED PLANT PROTEIN 26 (HIPP26);FARNESYLATED PROTEIN 6 (FP6);HEAVY METAL ASSOCIATED PROTEIN 40 (ATHMP40)	putative farnesylated protein (At4g38580) mRNA, complete		25.5216	24.7719	25.5188	22.3535	22.4616	22.4208	2.8588	2.46705	2	2	2	15	15	15	2.3861	37839000	39996000	60968000	804810	953240	1078000	36481000	12434000	46544000	6728000	6830400	6352100	2	RVDDPGVSQLAR;VTVVGYVDPNK
AT2G42600	AT2G42600.3;AT2G42600.2;AT2G42600.1	PHOSPHOENOLPYRUVATE CARBOXYLASE 2 (PPC2)	PHOSPHOENOLPYRUVATE CARBOXYLASE 2 (ATPPC2);PHOSPHOENOLPYRUVATE CARBOXYLASE 2 (PPC2)	Encodes one of four Arabidopsis phosphoenolpyruvate carboxylase proteins.PPC1 and PPC2 are crucial for balancing carbon and nitrogen metabolism.		25.4401	27.5908	26.8619	25.4616	26.792	27.1302	0.169701	0.37419	11	11	6	16	16	9.6	78.426	35761000	282220000	154680000	6939400	19177000	28202000	21973000	47599000	30707000	16129000	27746000	38713000	30	DITPDDKQELDEALQR;FLDILQDLHGEDVR;GDFADEASATTESDIEETLKR;HSDVLDAITTHLGIGSYK;HYIEFWK;LATPELEYGR;LLVSEELQPFGEQLR;LSAAWQLYK;TEEVADVLDTFK;VTIDLVEMVFAK;VTVQGEVIEQSFGEEHLCFR
AT5G45775	AT5G45775.1;AT5G45775.2;AT4G18730.1;AT3G58700.1;AT2G42740.1	RIBOSOMAL PROTEIN UL5W (UL5W)	(RPL16D);RIBOSOMAL PROTEIN UL5W (UL5W)	Overexpression results in short and curled rosette leaves; both the cell size and cell arrangement are affected in L16D-OEs. Overexpression of this gene decreases the expression of genes involved in plant growth, but increases the expression of genes involved in immune response suggesting that RPL16D is involved in the balance between plant growth and immune response.		30.9373	30.7589	31.2563	30.2744	30.8362	30.0773	0.588221	1.27256	10	10	10	61	61	61	132	1615199999.9999998	2536800000	3252999999.9999995	195040000	316390000	217490000	945490000	865870000	1047699999.9999999	384000000	583490000	335340000	135	AMQLLESGLK;IACYVTVR;LVLNISVGESGDR;NFSDTGCFGFGIQEHIDLGIK;RNFSDTGCFGFGIQEHIDLGIK;VKEYELLR;VLEQLSGQTPVFSK;YDPSTGIYGMDFYVVLER;YDPSTGIYGMDFYVVLERPGYR;YEGVILNK
AT2G42910	AT2G42910.1	PHOSPHORIBOSYL DIPHOSPHATE SYNTHASE 4 (PRS4)	PHOSPHORIBOSYL DIPHOSPHATE SYNTHASE 4 (PRS4); (ATPRS4)	Phosphoribosyltransferase family protein;(source:Araport11)		21.9842	21.488	18.8091	24.4399	24.3866	24.1119	-3.55234	1.47054	2	2	2	7.1	7.1	7.1	4.5597	3259100	0	0	0	3619800	3480800	7145300	0	0	0	20009000	17434000	4	ICTDAIVSELQK;VIVAFPDDGAWK
AT1G59359	AT1G59359.1;AT1G58983.1;AT1G58684.1;AT1G58380.1	RIBOSOMAL PROTEIN US5Y (US5Y)	RIBOSOMAL PROTEIN US5Y (US5Y)	Ribosomal protein S5 family protein;(source:Araport11)		32.8143	32.2161	32.5329	29.2663	30.2172	29.5039	2.85865	2.9332	12	5	5	42.3	18.7	18.7	323.31	5932899999.999999	6965299999.999999	7880799999.999999	96977000	206000000	146160000	3874999999.9999995	3321799999.9999995	3781699999.9999995	312900000	610000000	334550000	135	AFVVVGDGNGHVGLGVK;ATFDCLQK;EYQIIDHLVGPTLK;EYQIIDHLVGPTLKDEVMK;KVLQFAGIDDVFTSSR;LEQIYLHSLPVK;LSVVPVRR;SPYQEHTDFLSTK;TLGNFVK;TYGFLTPEFWK;VITEGEDQA;VLQFAGIDDVFTSSR
AT2G39010	AT2G39010.1;AT2G39010.2	PLASMA MEMBRANE INTRINSIC PROTEIN 2E (PIP2E)	PLASMA MEMBRANE INTRINSIC PROTEIN 2E (PIP2E);PLASMA MEMBRANE INTRINSIC PROTEIN 2;6 (PIP2;6)	Plasma membrane intrinsic protein 2E.		25.8331	25.5335	25.0761	21.4504	23.2821	23.1713	2.84631	1.83967	2	2	2	20.1	20.1	20.1	6.0533	46960000	67805000	44860000	0	0	0	25561000	21405000	18730000	0	0	0	8	DSHIPVLAPLPIGFSVFMVHLATIPITGTGINPAR;TKDELTEEESLSGKDYLDPPPVK
AT2G43750	AT2G43750.2;AT2G43750.1	O-ACETYLSERINE (THIOL) LYASE B (OASB)	O-ACETYLSERINE (THIOL) LYASE B (OASB);ARABIDOPSIS CYSTEINE SYNTHASE 1 (ACS1);CHLOROPLAST O-ACETYLSERINE SULFHYDRYLASE 1 (CPACS1);ARABIDOPSIS THALIANA CYSTEIN SYNTHASE-B (ATCS-B)	Arabidopsis thaliana O-acetylserine (thiol) lyase (OAS-TL) isoform oasB, the key enzyme for fixation of inorganic sulfide. It catalyzes the formation of cysteine from O-acetylserine and inorganic sulfide. Required for pollen tube growth and/or fertilization.		24.7191	24.9905	24.4033	26.4552	26.5812	26.2877	-1.73711	2.82832	4	4	4	17.9	17.9	17.9	23.146	21695000	46537000	28139000	13818000	16570000	15728000	11874000	22812000	13436000	85445000	88491000	66613000	9	AFGAELVLTEPAK;GKIDILVAGIGTGGTITGVGR;IHYETTGPEIWEDTR;VIGVEPTESAILSGGKPGPHK
AT4G31460	AT4G31460.1	RIBOSOMAL PROTEIN BL28M (BL28M)	RIBOSOMAL PROTEIN BL28M (BL28M)	Ribosomal L28 family;(source:Araport11)		24.8688	24.8008	24.7217	20.7913	21.7516	23.3106	2.84591	1.52222	3	3	3	10.4	10.4	10.4	5.193	24067000	40804000	35088000	0	0	0	22729000	25712000	22512000	0	0	0	8	AGGIDEYLLK;KVGAENITPELK;VGAENITPELK
AT2G43910	AT2G43910.1;AT2G43910.2	HARMLESS TO OZONE LAYER 1 (HOL1)	(ATHOL1);HARMLESS TO OZONE LAYER 1 (HOL1)	HARMLESS TO OZONE LAYER 1;(source:Araport11)		27.2782	27.2808	26.5734	26.7678	26.9074	26.5081	0.316333	0.800122	7	7	7	37.4	37.4	37.4	43.433	127860000	227640000	126640000	17161000	20774000	18324000	58588000	69937000	54936000	38706000	52712000	40442000	33	ATPLIVHLVDTSSLPLGR;AVSVEENPHAIPTR;AVSVEENPHAIPTRK;CWEEEITPWDQGR;FVVGLDISESALAK;TVEEGGWEK;VDVSTFEEVLVPIGFK
AT2G44060	AT2G44060.2;AT2G44060.1	LATE EMBRYOGENESIS ABUNDANT 26 (LEA26)	LATE EMBRYOGENESIS ABUNDANT 26 (LEA26)	Late embryogenesis abundant protein, group 2;(source:Araport11)		25.099	25.6862	24.6488	26.3083	26.5019	27.1473	-1.50784	2.01097	5	5	5	22.2	22.2	22.2	32.83	28231000	75376000	33360000	12480000	15684000	28539000	23566000	24376000	19564000	22733000	51142000	60023000	9	IKVDLIVDVPVLGR;IPLTLIYDDIK;NPNPVPIPLIDVNYLVESDGRK;STSEDKPEIISR;VVHQEGDVEIVDR
AT2G19310	AT2G19310.1	(HSP18.5)	(HSP18.5)	HSP20-like chaperones superfamily protein;(source:Araport11)		26.7777	26.4383	26.8561	23.0391	25.3506	23.1646	2.83929	1.52653	2	2	2	26.5	26.5	26.5	37.582	90381000	126950000	154060000	0	0	0	75942000	64242000	80222000	0	0	0	20	DASSSPPQLPEIEENR;EIFPQTSSSTVNTQLNWTETPTAHVFK
AT2G44160	AT2G44160.1	METHYLENETETRAHYDROFOLATE REDUCTASE 2 (MTHFR2)	METHYLENETETRAHYDROFOLATE REDUCTASE 2 (MTHFR2)	methylenetetrahydrofolate reductase MTHFR2 mRNA, complete The mRNA is cell-to-cell mobile.		25.8318	25.2641	25.9368	24.8968	24.9181	24.8237	0.797993	1.52475	7	5	5	18	14.8	14.8	31.27	46918000	56255000	81458000	4691600	5232400	5701100	23523000	24290000	23539000	17680000	18106000	21512000	15	EIIQPTIVDPASFNVWKDEAFETWSR;IDHALETIR;LQQEWVVPLK;SASYGALSDHQFSRPR;SDSPTVGWGGPVGYVYQK;SSPWSELDGLQPETR;SWANLYPEADPSR
AT5G22880	AT5G22880.1	HISTONE B2 (HTB2)	HISTONE B2 (HTB2);HISTONE H2B (H2B)	Encodes a histone 2B (H2B) protein. This protein can be ubiquitinated in planta, and this modification depends on the HUB1 and HUB2 E3 ubiquitin ligases.		29.5813	28.785	29.2486	27.1974	26.4303	25.4807	2.83546	2.09219	5	5	1	37.2	37.2	8.3	44.973	631000000	645750000	808890000	23114000	14925000	8989300	527260000	309370000	479620000	82717000	45084000	61234000	51	AMGIMNSFINDIFEK;EIQTAVR;LVLPGELAK;QVHPDIGISSK;TPAAEPAAAAEK
AT2G44350	AT2G44350.4;AT2G44350.1;AT2G44350.3;AT2G44350.2	(ATCS)	(ATCS);CITRATE SYNTHASE 4 (CSY4)	encodes a mitochrondrion targeted citrate synthase, the first enzyme of the tricarboxylic acid cycle, catalyzing the condensation of acetyl-CoA and oxaloacetate, finally yielding citrate and CoA.		25.2367	24.8152	24.8003	27.2359	28.1052	26.9929	-2.49395	2.34388	2	2	2	6.6	6.6	6.6	4.3825	31059000	41213000	37053000	23738000	47656000	25642000	44323000	21762000	47187000	129540000	166910000	111430000	1	FWEPTYEDCLNLIAR;SVVEECGEDISKEQLK
AT2G44490	AT2G44490.1	PENETRATION 2 (PEN2)	PENETRATION 2 (PEN2);BETA GLUCOSIDASE 26 (BGLU26)	Encodes a glycosyl hydrolase that localizes to peroxisomes and acts as a component of an inducible preinvasion resistance mechanism. Required for mlo resistance. The mRNA is cell-to-cell mobile.		20.8362	20.9496	20.2363	23.0517	22.7295	20.7844	-1.51453	1.10525	2	1	1	3	1.8	1.8	2.5104	0	0	0	0	0	0	0	0	0	0	0	0	0	HVDPTQPTWR;LSIAWPR
AT2G44610	AT2G44610.1;AT5G10260.1;AT2G22290.1;AT4G39890.1	(RAB6A)	(RAB6); (ATRABH1B); (ATRAB6A); (RAB6A)	Golgi-localized small GTPase, participates in the trafficking of CESA6 to the plasma membrane, maintaining Golgi organization and morphology, possible role in exocytosis. Plays and important role in hypocotyl growth by influencing cell elongation/growth and deposition of cellulose microfibrils in the cell wall. Plays an important role in cellulose synthesis. Influences both the distribution and v…		23.9517	23.1724	23.7794	24.9128	24.1901	25.1128	-1.10404	1.68892	2	2	2	10.1	10.1	10.1	2.337	12746000	13198000	18260000	4743700	3159000	6965800	20684000	11645000	19589000	27125000	20571000	27203000	2	LVFLGDQSVGK;QVSIEEAEAK
AT2G44640	AT2G44640.1	0	0	TRIGALACTOSYLDIACYLGLYCEROL-like protein;(source:Araport11)		23.9384	23.8873	24.288	24.3957	24.8714	24.3032	-0.485525	1.32211	4	4	4	11.5	11.5	11.5	56.63	12629000	21663000	25978000	3314900	5065500	0	10117000	12487000	15350000	20150000	25560000	0	10	DLWRPQEK;LNLIFQQQVAGPIVFK;SPISADVFGSACYTFQK;VDSQFQVGAAR
AT2G44650	AT2G44650.1	CHLOROPLAST CHAPERONIN 10 (CHL-CPN10)	CHLOROPLAST CHAPERONIN 10 (CHL-CPN10);CHLOROPLAST CHAPERONIN 10 (CPN10)	Encodes a chloroplast-localized chaperonin 10 whose mRNA is expressed in leaves and stems but not roots.		22.2363	21.2861	18.9277	26.3888	26.9742	26.1723	-5.69506	1.93335	2	2	2	28.1	28.1	28.1	13.501	0	0	0	13196000	21759000	14518000	0	0	0	37154000	54427000	29781000	4	VLFSDVSAYEVDLGTDAR;YLTGEIISVGSEVGQQVGPGK
AT5G65020	AT5G65020.1;AT5G65020.2	ANNEXIN 2 (ANNAT2)	(ATANN2);ANNEXIN 2 (ANNAT2)	Annexins are calcium binding proteins that are localized in the cytoplasm. When cytosolic Ca2+ increases, they relocate to the plasma membrane. They may be involved in the Golgi-mediated secretion of polysaccharides.		24.1672	25.2939	25.4354	19.6072	21.9656	24.8321	2.83055	1.00864	5	5	5	24.9	24.9	24.9	19.703	14799000	57431000	57544000	0	0	5734200	16319000	19384000	20491000	0	0	20463000	13	AFSGWGTNEK;AQLGATLNHYNNEYGNAINK;NNWVLVEIACTRPALELIK;SVYAATYNEDLLK;VPSNVPLPEDDAEQLHK
AT2G45180	AT2G45180.1	DISEASE RELATED NONSPECI&#64257;C LIPID TRANSFER PROTEIN 1 (DRN1)	DISEASE RELATED NONSPECI&#64257;C LIPID TRANSFER PROTEIN 1 (DRN1)	nsLTP family-related gene. Expression is strongly suppressed by bacterial pathogens. Mutants are more susceptible to pathogens and abiotic stressors suggesting a function in basal stress response.		29.4911	29.7611	29.9376	29.1865	29.5427	28.7232	0.579173	1.22628	5	5	5	67.2	67.2	67.2	99.46	592780000	1270300000	1304100000	91757000	129070000	85076000	301290000	386420000	470980000	217080000	355130000	110370000	54	ANVLGINLNVPIDLTLLLNYCGK;KAPAVKPTCPTDTLK;LGVCADLLGLVNVVVGSPPK;TPCCTLLQGLANLEAAVCLCTALK;VPHGFQCS
AT2G45470	AT2G45470.1	FASCICLIN-LIKE ARABINOGALACTAN PROTEIN 8 (FLA8)	ARABINOGALACTAN PROTEIN 8 (AGP8);FASCICLIN-LIKE ARABINOGALACTAN PROTEIN 8 (FLA8)	Fasciclin-like arabinogalactan protein. Possibly involved in embryogenesis and seed development.		22.7034	23.4638	24.0478	25.8386	25.7783	25.9655	-2.45584	1.95082	3	3	3	13.3	13.3	13.3	25.7	5365000	16152000	21994000	9012200	9498100	12580000	8033000	14499000	12608000	42126000	50233000	52766000	10	GLTVFAPSDEAFKAEGVPDLTK;LTQAEVVSLLEYHALAEYKPK;TFANLLVSSGVLK
AT4G12390	AT4G12390.1	PECTIN METHYLESTERASE INHIBITOR 1 (PME1)	PECTIN METHYLESTERASE INHIBITOR 1 (PME1)	pectin methylesterase inhibitor 1;(source:Araport11)		25.7542	25.4714	26.1303	21.8139	22.1973	24.8581	2.82891	1.33406	2	2	2	16	16	16	31.435	44461000	64951000	93154000	0	0	0	49143000	40375000	70426000	0	0	0	8	DRDEFLWR;LSNVETWVSAALTDETTCLDGFDGK
AT5G12470	AT5G12470.1	RETICULATA-RELATED 4 (RER4)	RETICULATA-RELATED 4 (RER4)	UvrABC system C protein, putative (DUF3411);(source:Araport11)		26.0161	25.9183	25.2729	22.7557	24.271	21.7153	2.82177	1.58563	3	3	3	8.5	8.5	8.5	5.586	53309000	88535000	51415000	0	0	0	66779000	29850000	32848000	0	0	0	8	DLAAAIEAGR;ESGIELESLPK;LAMECGVGIFTK
AT2G36160	AT2G36160.1	RIBOSOMAL PROTEIN US11Z (US11Z)	RIBOSOMAL PROTEIN US11Z (US11Z)	Ribosomal protein S11 family protein;(source:Araport11)		29.8799	29.0287	29.8142	26.3044	27.0859	26.8927	2.81329	3.09821	9	1	1	60	7.3	7.3	3.0475	776110000	764570000	1197200000	12446000	23510000	23921000	1127000000	669680000	1088400000	74370000	121320000	97901000	20	ADRDESSPYAAMLAAQDVAQR;DESSPYAAMLAAQDVAQR;EGEQVFGVVHIFASFNDTFIHVTDLSGR;IEDVTPIPTDSTR;IEDVTPIPTDSTRR;IGRIEDVTPIPTDSTR;TPGPGAQSALR;VDVVTLGPSVR;VKADRDESSPYAAMLAAQDVAQR
AT2G45960	AT2G45960.2;AT2G45960.1;AT2G45960.3	PLASMA MEMBRANE INTRINSIC PROTEIN 1B (PIP1B)	(ATHH2);NAMED PLASMA MEMBRANE INTRINSIC PROTEIN 1;2 (PIP1;2);PLASMA MEMBRANE INTRINSIC PROTEIN 1B (PIP1B);TRANSMEMBRANE PROTEIN A (TMP-A)	a member of the plasma membrane intrinsic protein subfamily PIP1. localizes to the plasma membrane and exhibits water transport activity in Xenopus oocyte. expressed ubiquitously and protein level decreases slightly during leaf development. Involved redundantly with PIP1;1/3/4/5 in hydraulics and carbon fixation, regulates the expression of related genes that affect plant growth and development.		26.5077	26.3828	26.0041	26.3403	26.9777	26.3672	-0.263584	0.734343	5	5	2	35.4	35.4	16.1	98.265	74951000	122160000	85349000	12760000	21812000	16619000	47792000	57241000	35044000	58961000	42418000	38476000	23	DSHVPILAPLPIGFAVFLVHLATIPITGTGINPAR;MEGKEEDVR;QPIGTSAQSDKDYKEPPPAPLFEPGELASWSFWR;SLGAAIIFNK;VGANKFPER
AT1G28290	AT1G28290.2;AT1G28290.1	ARABINOGALACTAN PROTEIN 31 (AGP31)	ARABINOGALACTAN PROTEIN 31 (AGP31)	Encodes an atypical arabinogalactan protein that is localized to the plasma membrange. AGP31 is highly expressed in flowers and vascular tissue and is repressed by jasmonic acid. AGP31 may play a role in vascular tissue function during defense and development.		25.123	25.2104	25.3616	20.9175	23.9838	22.4041	2.7965	1.36452	2	2	2	10.8	10.8	10.8	21.994	28704000	54200000	54674000	0	0	0	41577000	47356000	49584000	0	0	0	7	LFGGDVGAELKPEKK;YAAFNTLLGAKPIEGATVK
AT2G46280	AT2G46280.2;AT2G46280.1;AT2G46280.3;AT2G46290.1	TGF-BETA RECEPTOR INTERACTING PROTEIN 1 (TRIP-1)	TGF-BETA RECEPTOR INTERACTING PROTEIN 1 (TRIP-1); (TIF3I1); (TRIP1)	Encodes a homolog of mammalian TGF-beta receptor interacting protein. Co-immunoprecipitates with BRI1 and can be phosphorylated in vitro by BRI1 at specific sites (Thr-14, Thr-89, and either Thr-197 or Ser-198). May therefore be a cytoplasmic BRI1 substrate and involved in brassinosteroid regulated plant growth and development.The encoded protein has two DWD motifs. It can bind to DDB1a in Y2H as…		24.9609	25.3891	25.6236	25.7575	24.7049	25.6676	-0.0521544	0.346166	2	2	2	8.8	8.8	8.8	12.321	25654000	61348000	65563000	8519300	4513500	10233000	19842000	29175000	33069000	24494000	30898000	24477000	13	AVWGPLNQTIVSGGEDK;SFSSGGEDGYVR
AT2G46820	AT2G46820.2;AT2G46820.1	PHOTOSYSTEM I P SUBUNIT (PSI-P)	PHOTOSYSTEM I P SUBUNIT (PSI-P); (PSAP);THYLAKOID MEMBRANE PHOSPHOPROTEIN OF 14 KDA (TMP14);PLASTID TRANSCRIPTIONALLY ACTIVE 8 (PTAC8);CURVATURE THYLAKOID 1B (CURT1B)	Encodes the P subunit of Photosystem I. About 25% of the TMP14 pool appeared to be phosphorylated, and this ratio is not affected by light. Contains seven phosphorylation sites on threonine residue and chloroplast targeting signal. Located in the proximity of PSI-L, -H and -O subunits. Forms oligomers with other members of CURT1 family to modulate grana structure.		25.9195	26.5575	26.2901	26.9729	27.9598	27.0154	-1.06034	1.52048	2	2	2	19	19	19	31.526	49857000	137890000	104060000	19782000	43086000	26045000	43984000	70504000	59585000	70393000	125680000	63686000	14	ATTEVGEAPATTTEAETTELPEIVK;TAQEAWEK
AT3G62250	AT3G62250.1;AT2G47110.2;AT2G47110.1	UBIQUITIN 5 (UBQ5)	UBIQUITIN 5 (UBQ5);RIBOSOMAL PROTEIN ES31X (ES31X)	ubiquitin 5;(source:Araport11)		28.9156	28.8548	28.8347	29.021	29.1883	29.6067	-0.403676	1.14297	5	5	1	35.7	35.7	5.7	185.19	397770000	677750000	607130000	81810000	100960000	156960000	198340000	211640000	198660000	350300000	317180000	423190000	65	CGLTYVYQK;ESTLHLVLR;IQDKEGIPPDQQR;TITLEVESSDTIDNVK;TLADYNIQK
AT5G16130	AT5G16130.1	RIBOSOMAL PROTEIN ES7X (ES7X)	RIBOSOMAL PROTEIN ES7X (ES7X)	Ribosomal protein S7e family protein;(source:Araport11)		30.6701	30.7376	30.8796	28.0335	27.5892	28.3376	2.77562	2.73733	11	11	8	56.3	56.3	46.8	323.31	1342100000	2499600000	2505300000	41263000	33325000	65126000	622420000	567260000	733490000	107570000	68677000	109440000	121	AVVIYVPFR;DKNAEPTECEEQVAQALFDLENTNQELK;DLYINQAVHMDISGNR;DLYINQAVHMDISGNRK;DVIFVTTR;DVVFEYPVEA;KAVVIYVPFR;LETMVGVYR;NAEPTECEEQVAQALFDLENTNQELK;SELKDLYINQAVHMDISGNR;TLTSVHEAMLEDVAFPAEIVGK
AT2G47400	AT2G47400.1	CP12 DOMAIN-CONTAINING PROTEIN 1 (CP12-1)	CP12 DOMAIN-CONTAINING PROTEIN 1 (CP12-1);CP12 DOMAIN-CONTAINING PROTEIN 1 (CP12)	CP12-1 encodes a small peptide found in the chloroplast stroma. It belongs to the CP12 gene family thought to be involved in the formation of a supramolecular complex with glyceraldehyde-3-phosphate dehydrogenase (GAPDH) and phosphoribulokinase (PRK) embedded in the Calvin cycle. The mRNA is cell-to-cell mobile.		22.5954	23.5174	22.3601	20.0586	23.2993	24.2992	0.271922	0.369355	3	3	3	41.9	41.9	41.9	91.495	0	16763000	0	0	1703700	0	0	10482000	0	0	9757400	0	6	AGGSDPLEEYCNDNPETDECR;ETCADDPVSGECVAAWDEVEELSAAASHAR;KAGGSDPLEEYCNDNPETDECR
AT2G47470	AT2G47470.3;AT2G47470.4;AT2G47470.1;AT2G47470.2	UNFERTILIZED EMBRYO SAC 5 (UNE5)	PDI-LIKE 2-1 (ATPDIL2-1);PROTEIN DISULFIDE ISOMERASE 11 (PDI11);ARABIDOPSIS THALIANA PROTEIN DISULFIDE ISOMERASE 11 (ATPDI11);UNFERTILIZED EMBRYO SAC 5 (UNE5);MATERNAL EFFECT EMBRYO ARREST 30 (MEE30)	Encodes a protein disulfide isomerase-like (PDIL) protein, a member of a multigene family within the thioredoxin (TRX) superfamily. Transcript levels for this gene are up-regulated in response to three different chemical inducers of ER stress (dithiothreitol, beta-mercaptoethanol, and tunicamycin). AtIRE1-2 does not appear to be required for this response, but the atbzip60 mutant has a diminished…		21.4266	22.3303	21.7648	26.0682	25.7941	24.4091	-3.58321	2.36941	3	3	3	10.8	10.8	10.8	7.2142	2214300	7362500	4519000	10567000	9602600	4276900	9983100	4843100	11285000	36245000	15159000	9742100	4	AGIVESLDALVK;DLDDFVSFINEK;NAEALAEYVNK
AT2G47510	AT2G47510.3;AT2G47510.2;AT2G47510.1	FUMARASE 1 (FUM1)	FUMARASE 1 (FUM1)	Encodes a mitochondrial-localized protein. The FUM1 gene appears to be essential, suggesting that FUM1 may play a crucial role as a fumarase in the tricarboxylic acid cycle.		29.9427	29.4962	29.842	33.3799	31.5778	31.2549	-2.31054	1.47115	3	3	2	6.7	6.7	4.5	5.2814	810650000	1057199999.9999999	1220500000	1678699999.9999998	528990000	491970000	1995099999.9999998	457310000	1917999999.9999998	8323299999.999999	1814899999.9999998	1964999999.9999998	5	LIADASASFEK;LSGGTTVTALR;SLQNFEIGGER
AT2G47610	AT2G47610.1	RIBOSOMAL PROTEIN EL8Z (EL8Z)	RIBOSOMAL PROTEIN EL8Z (EL8Z)	Ribosomal protein L7Ae/L30e/S12e/Gadd45 family protein;(source:Araport11)		25.4986	24.1964	24.8045	22.7626	24.4985	24.397	0.947134	0.913794	6	1	1	19.8	3.1	3.1	2.2034	37241000	26839000	37161000	1068700	0	4241200	32100000	19688000	18199000	7407700	0	15682000	4	ANFNDKYEEYR;ANFNDKYEEYRK;LGAVVHQK;NEDKLEFSK;VSNPLFER;YGLNHVTYLIEQNK
AT2G47730	AT2G47730.2;AT2G47730.1	GLUTATHIONE S-TRANSFERASE PHI 8 (GSTF8)	ARABIDOPSIS THALIANA GLUTATHIONE S-TRANSFERASE PHI 8 (ATGSTF8);GLUTATHIONE S-TRANSFERASE (CLASS PHI) 5 (ATGSTF5); (GST6);GLUTATHIONE S-TRANSFERASE PHI 8 (GSTF8)	Encodes glutathione transferase belonging to the phi class of GSTs. Naming convention according to Wagner et al. (2002).		26.8667	27.2243	26.8548	28.05	28.6175	27.9754	-1.23236	2.2586	7	7	6	38.4	38.4	35.4	92.353	96130000	218910000	153920000	41737000	67971000	50666000	51994000	78254000	58199000	102030000	162550000	60567000	42	AITQYLAEEYSEK;AITQYLAEEYSEKGEK;ATTNVWLQVEGQQFDPNASK;DLQFELIPVDMR;GMFGMTTDPAAVQELEGK;QEAHLALNPFGQIPALEDGDLTLFESR;VLDVYEAR
AT3G01090	AT3G01090.2;AT3G01090.3;AT3G01090.1	SNF1 KINASE HOMOLOG 10 (KIN10)	SNF1 KINASE HOMOLOG 10 (AKIN10); (KIN10);SNF1 KINASE HOMOLOG 10 (KIN10); (SNRK1); (SNRK1&#945;1)	Encodes a SNF1-related protein kinase that physically interacts with SCF subunit SKP1/ASK1 and 20S proteosome subunit PAD1. It can also interact with PRL1 DWD-containing protein. Based on in vitro degradation assays and cul4cs and prl1 mutants, there is evidence that AKIN10 is degraded in a proteasome-dependent manner, and that this depends on a CUL4-PRL1 E3 ligase		24.9457	23.9313	24.9371	27.2999	27.5963	26.1619	-2.41465	2.16448	11	11	10	24.9	24.9	22.1	35.771	25386000	22333000	40739000	24815000	33489000	14414000	11970000	8638600	9642300	61956000	124010000	9440600	20	DLKPENLLLDSK;GGIYTLPSHLSPGAR;IADFGLSNIMR;KIDEEILQEVINMGFDR;LPGLMEYQGVGLR;NFFQQIISGVEYCHR;NHLIESLR;RVDEFNLVSSTIDHR;SGVESILPNYK;TLGIGSFGR;VTIPEIR
AT3G01280	AT3G01280.1	VOLTAGE DEPENDENT ANION CHANNEL 1 (VDAC1)	VOLTAGE DEPENDENT ANION CHANNEL 1 (VDAC1);ARABIDOPSIS THALIANA VOLTAGE DEPENDENT ANION CHANNEL 1 (ATVDAC1)	Encodes a voltage-dependent anion channel (VDAC: AT3G01280/VDAC1, AT5G67500/VDAC2, AT5G15090/VDAC3, AT5G57490/VDAC4, AT5G15090/VDAC5). VDACs are reported to be porin-type, beta-barrel diffusion pores. They are prominently localized in the outer mitochondrial membrane and are involved in metabolite exchange between the organelle and the cytosol. The mRNA is cell-to-cell mobile.		23.9758	23.9033	24.6067	25.3379	25.8654	24.3822	-1.03322	1.20444	3	3	3	18.5	18.5	18.5	12.015	12960000	21905000	32399000	6369400	10089000	4197900	18470000	18830000	15328000	37352000	41634000	16861000	13	SFFTISGEVDTK;VCTDSTFLITATVDEAAPGLR;VNSAGIASALIQHEWKPK
AT3G01390	AT3G01390.4;AT3G01390.3;AT3G01390.2;AT3G01390.1	VACUOLAR MEMBRANE ATPASE 10 (VMA10)	VACUOLAR MEMBRANE ATPASE 10 (VMA10); (AVMA10)	Subunit G of the vacuolar membrane ATPAse complex		21.5041	22.0465	19.9528	24.3083	23.6774	24.8503	-3.11086	1.97575	3	3	3	33.6	33.6	33.6	4.8682	0	0	0	3120000	2214200	5806900	0	0	0	11338000	10535000	12093000	4	AQTEQDFQR;KLEETSGDSGANVK;RLEQETDTKIEQLK
AT3G01480	AT3G01480.1;AT3G01480.2	CYCLOPHILIN 38 (CYP38)	CYCLOPHILIN 38 (CYP38);ARABIDOPSIS CYCLOPHILIN 38 (ATCYP38)	Encodes a chloroplast cyclophilin functioning in the assembly and maintenance of photosystem II (PSII) supercomplexes. The mRNA is cell-to-cell mobile.		22.0494	23.7859	23.5363	24.7513	25.1282	24.8325	-1.78017	1.42192	2	2	2	5.9	5.9	5.9	3.3817	3409600	20192000	15428000	4241500	0	5735800	8647700	12184000	10760000	19565000	0	18830000	2	ESELTPSNSNILDGR;SIIVAGFAESK
AT3G01500	AT3G01500.4;AT3G01500.1;AT3G01500.3;AT3G01500.2	CARBONIC ANHYDRASE 1 (CA1)	CARBONIC ANHYDRASE 1 (CA1); (DEG10); (BCA1)	Encodes a putative beta-carbonic anhydrase betaCA1 that is expressed in shoot tissues but not root. Together with betaCA4 (At1g70410) regulates CO2-controlled stomatal movements in guard cells, as well as attenuates immunity. Differential CA gene expression in response to changing atmospheric CO2 conditions contribute to altered disease resistance levels. Activated by OXS2 under the treatment of …		29.1276	29.7498	29.1688	30.5112	30.7543	30.6457	-1.28836	2.11789	10	5	5	52.9	28.6	28.6	92.208	460740000	1260400000	765360000	229840000	298920000	322520000	325480000	549170000	356240000	600120000	749620000	614160000	72	AFDPVETIK;EKYETNPALYGELAK;GLMSFPLDGNNSTDFIEDWVK;GTEAYDEAIEALKK;NIANMVPPFDK;VCPSHVLDFQPGDAFVVR;VENIVVIGHSACGGIK;VEQITAALQTGTSSDKK;VISELGDSAFEDQCGR;YETNPALYGELAK
AT5G51440	AT5G51440.1	(HSP23.5)	(HSP23.5)	HSP20-like chaperones superfamily protein;(source:Araport11)		26.2885	26.2979	26.6612	23.561	23.7496	23.6295	2.76916	3.69296	4	3	3	25.2	21.4	21.4	83.061	64390000	115180000	134590000	1858700	2327800	2491500	63350000	73947000	57139000	38196000	40853000	35498000	24	GEGETEEGEDVSGDGRR;HGGDFFSHILDPFTPTR;IDMPGLSR;LALEQNTLVIR
AT3G54210	AT3G54210.1	PLASTID RIBOSOMAL PROTEINS OF THE 50S SUBUNIT 17 (PRPL17)	RIBOSOMAL PROTEIN BL17C (BL17C);PLASTID RIBOSOMAL PROTEINS OF THE 50S SUBUNIT 17 (PRPL17); (RPL17)	Ribosomal protein L17 family protein;(source:Araport11)		30.1777	29.9786	30.4344	27.603	28.5537	26.1599	2.75804	1.57136	6	6	6	24.6	24.6	24.6	54.51	954060000	1476999999.9999998	1840099999.9999998	30616000	65030000	14394000	399230000	397660000	540050000	70888000	128510000	36689000	115	GLTTQLLK;LNRPPDQR;QALGYIYEK;QIVHALFAEVPDR;RGDNAPMAYIELV;RQALGYIYEK
AT3G02230	AT3G02230.1	REVERSIBLY GLYCOSYLATED POLYPEPTIDE 1 (RGP1)	REVERSIBLY GLYCOSYLATED POLYPEPTIDE 1 (RGP1);ARABIDOPSIS THALIANA REVERSIBLY GLYCOSYLATED POLYPEPTIDE 1 (ATRGP1)	RGP1 is a UDP-arabinose mutase that catalyzes the interconversion between the pyranose and furanose forms of UDP-L-arabinose. It appears to be required for proper cell wall formation. rgp1/rgp2 (at5g15650) double mutants have a male gametophyte lethal phenotype. RGP1 fusion proteins can be found in the cytosol and peripherally associated with the Golgi apparatus. The mRNA is cell-to-cell mobile.		24.3905	24.9799	24.1453	25.6677	23.5918	24.1561	0.0333764	0.317101	5	2	2	26.9	12.3	12.3	19.131	17276000	46198000	23532000	8005300	0	0	25898000	32584000	22983000	42023000	0	0	5	EGVSTAVSHGLWLNIPDYDAPTQLVKPK;TIAVPEGFDYELYNR;VEPANTVGIPVNHIPLLKDELDIVIPTIR;YDDMWAGWCIK;YIFTIDDDCFVAK
AT3G06400	AT3G06400.1;AT3G06400.2;AT3G06400.3;AT5G18620.1;AT5G18620.2	CHROMATIN-REMODELING PROTEIN 11 (CHR11)	CHROMATIN-REMODELING PROTEIN 11 (CHR11)	Encodes a SWI2/SNF2 chromatin remodeling protein belonging to the ISWI family. Involved in nuclear proliferation during megagametogenesis and cell expansion in the sporophyte. Constitutively expressed. RNAi induced loss of function in megagametogenesis results in female sterility.35S:RNAi plants have reduced stature. Double mutation in CHR17 and CHR11 results in the loss of the evenly spaced nucl…		25.8706	24.6066	26.0031	23.2664	23.3199	21.6394	2.75156	2.01498	7	7	7	7.1	7.1	7.1	25.791	48196000	35665000	85293000	1515300	0	0	24316000	26390000	28349000	20294000	0	0	12	EGLLEEGFSTWSR;FCTESAIEEK;FLGNPEER;FTEDAIQFK;GEEATAELDAK;IVSDNWNDPPKR;LALDALVIQQGR
AT3G09630	AT3G09630.1;AT3G09630.2	SUPPRESSOR OF ACAULIS 56 (SAC56)	SUPPRESSOR OF ACAULIS 56 (SAC56);RIBOSOMAL PROTEIN UL4Z (UL4Z)	Ribosomal protein L4/L1 family;(source:Araport11)		34.3881	33.7836	34.2459	31.2906	31.6719	31.2268	2.74274	3.68816	23	23	9	48.3	48.3	18	323.31	17661000000	20644000000	25837000000	394500000	564670000	482470000	3843299999.9999995	3012399999.9999995	3617499999.9999995	537790000	531680000	394880000	515	AGHQTSAESWGTGR;AGQAAFGNMCR;GHKIENVPEMPLVVSDSAEAVEK;GPLVVYGTEGSK;IENVPEMPLVVSDSAEAVEK;IINSDEIQSVVNPIK;IINSDEIQSVVNPIKK;KAGHQTSAESWGTGR;KGPLVVYGTEGSK;KGYVLPR;KTVTKEEALAIK;LAPGGHLGR;LESIYGSFEK;LESIYGSFEKPSEK;MSLLAEAQR;MVNADLAR;NLNVMLK;NLPGVELCHVER;NSIGIRPGK;QIGAYDDAEK;SAFEKLESIYGSFEKPSEK;TMISDSDYTEFDNFTK;TVTKEEALAIK
AT4G24510	AT4G24510.1	ECERIFERUM 2 (CER2)	ECERIFERUM 2 (CER2); (VC2); (VC-2)	Encodes a component of the fatty acid elongation machinery required for C28 to C30 fatty acid elongation. It does not require the acyltransferase catalytic site for biological function.		26.0592	25.7951	25.6987	23.2301	24.0556	22.0757	2.73051	1.72642	2	2	2	5.2	5.2	5.2	-2	54925000	81287000	69068000	0	0	0	46428000	45205000	50816000	0	0	0	1	TPELTSHAR;VVEANVEEFTVEK
AT3G02730	AT3G02730.1	THIOREDOXIN F-TYPE 1 (TRXF1)	THIOREDOXIN F-TYPE 1 (TRXF1); (ATF1)	Encodes a type-f thioredoxin. Has a role in the short-term activation of carbon metabolism. Loss affects growth under short-day conditions.		23.2157	23.0471	21.7742	24.0369	24.4325	24.6246	-1.68564	1.58924	2	2	2	11.2	11.2	11.2	3.5307	0	12100000	0	2585000	3736800	4966000	0	11509000	0	0	0	0	3	YDDLVAAIETAR;YDDVVFLK
AT5G61780	AT5G61780.1	TUDOR-SN PROTEIN 2 (TUDOR2)	TUDOR-SN PROTEIN 2 (TUDOR2);TUDOR-SN PROTEIN 2 (TSN2);ARABIDOPSIS THALIANA TUDOR-SN PROTEIN 2 (AtTUDOR2)	Involved in the regulation of AtGA20ox3 expression, as well as seed germination. The mRNA is cell-to-cell mobile.		25.9716	25.1273	25.4032	21.9758	24.184	22.16	2.72743	1.61488	6	6	4	9.8	9.8	7.5	28.448	51692000	51166000	56276000	619430	3145700	899730	18709000	16364000	19482000	6787000	5633500	6757000	16	DLGLELVENGLAK;GDTAVAAAATPGANIAELIISR;IVLEGVDKFNNLIGSVYYSDGDTVK;REEKPAPYAR;RGGIDEPFAWESR;TNAGTYLLEAGLAK
AT3G03250	AT3G03250.3;AT3G03250.1;AT3G03250.2	0	0	Is thought to encode a cytosolic UDP-glucose pyrophosphorylase with strong similarity to potato UTP--glucose-1-phosphate uridylyltransferase. Downregulated by flooding.		26.6008	27.1449	27.0933	26.5893	26.4158	27.516	0.10596	0.397833	10	10	5	31.1	31.1	16.4	51.958	79949000	207180000	181580000	15164000	14775000	36847000	22478000	38115000	36102000	47401000	48331000	56432000	36	AATTENLPQLK;ASSDLLLVQSDLYTLVDGFVTR;FFDNAIGVNVPR;IQTPTDEIVVPYEK;SAVDGLTEMSESEK;TNPSNPSIELGPEFK;VLQLETAAGAAIR;VQLLEIAQVPDEHVNEFK;VVADEFVPWPSK;YLSGEAQHIEWSK
AT3G03780	AT3G03780.3;AT3G03780.2;AT3G03780.1	METHIONINE SYNTHASE 2 (MS2)	METHIONINE SYNTHASE 2 (ATMS2);METHIONINE SYNTHASE 2 (MS2)	Encodes a cytosolic methionine synthase, involved in methionine regeneration via the activated methyl cycle (or SAM cycle)		27.5512	24.3861	24.6474	25.1202	25.3339	25.8264	0.101443	0.332418	17	3	3	28.5	6.4	6.4	7.7494	154500000	30611000	33327000	5477300	6979900	11423000	109630000	20310000	16864000	68059000	45319000	45298000	10	AIKEEIK;ALAGQTNESFFTANADALSSR;CVKPPVIYGDVSRPK;DKLVVSTSCSLLHTAVDLINETK;FALESFWDGK;GGIGVIQIDEAALR;GNASVPAMEMTK;GVTAFGFDLVR;HETCYQIALAIKDEVEDLEK;IPSTDEIADR;KLNLPILPTTTIGSFPQTVELR;LNLPILPTTTIGSFPQTVELR;LVVSTSCSLLHTAVDLINETK;SWLAFAAQK;WFDTNYHYIVPELGPEVK;YGAGIGPGVYDIHSPR;YLFAGVVDGR
AT1G07360	AT1G07360.1;AT2G29580.1	MOS4-ASSOCIATED COMPLEX SUBUNIT 5A (MAC5A)	MOS4-ASSOCIATED COMPLEX SUBUNIT 5A (MAC5A); (ATC3H4)	Encodes MAC5A, a component of the MOS4-associated complex (MAC) that contributes to snc1- mediated autoimmunity. MAC is a highly conserved nuclear protein complex associated with the spliceosome. Homologues include AT1G07360 (MAC5A), AT2G29580 (MAC5B) and AT5G07060 (MAC5C).		25.8482	25.7581	25.8086	22.1001	24.671	22.4761	2.72263	1.4163	3	3	3	8.7	8.7	8.7	11.62	47454000	79231000	74535000	675160	0	0	29507000	19825000	25621000	4759000	0	0	8	AGLDYESSFGK;DQFYAHGEIESIR;SDFPIICESCLGDNPYVR
AT3G03960	AT3G03960.1	CHAPERONIN CONTAINING T-COMPLEX POLYPEPTIDE-1 SUBUNIT 8 (CCT8)	CHAPERONIN CONTAINING T-COMPLEX POLYPEPTIDE-1 SUBUNIT 8 (CCT8)	TCP-1/cpn60 chaperonin family protein;(source:Araport11)		25.6263	26.3612	26.0605	26.2485	26.5943	26.7719	-0.522177	1.20399	11	11	11	31.5	31.5	31.5	58.346	40687000	120350000	88754000	11973000	16721000	21999000	15569000	21610000	21529000	27868000	25782000	29609000	32	AQQEEIGDGANLTISFAGELLQNAEELIR;AVEILEQLVETGSETMDVR;GSTDSILDDLER;HLSGLDEAVIK;LGIDLEEGACK;LLGGGLHNSCIVR;NEEGGNSISTVVLR;TLADNAGLNAMEIIAALYTGHGSGNTK;VAVFAGGVDTTATETK;YAESFEFVPK;YASDAACTVLR
AT3G04120	AT3G04120.1	GLYCERALDEHYDE-3-PHOSPHATE DEHYDROGENASE C SUBUNIT 1 (GAPC1)	(GAPC-1);GLYCERALDEHYDE-3-PHOSPHATE DEHYDROGENASE C SUBUNIT (GAPC);GLYCERALDEHYDE-3-PHOSPHATE DEHYDROGENASE C SUBUNIT 1 (GAPC1)	encodes cytosolic GADPH (C subunit) involved in the glycolytic pathway but also interacts with H2O2 potentially placing it in a signalling cascade induced by ROS. The mRNA is cell-to-cell mobile.		30.0503	30.5406	30.0188	30.8252	31.1331	30.8522	-0.733594	1.83441	13	13	1	51.8	51.8	8	323.31	873410000	2180500000	1379600000	285710000	388690000	372140000	289540000	447170000	338550000	396670000	511720000	378530000	154	AASFNIIPSSTGAAK;AATYDEIKK;DAPMFVVGVNEHEYK;GILGYTEDDVVSTDFVGDNR;KVVISAPSK;LTGMSFR;LVSWYDNEWGYSSR;NPEDIPWAEAGADYVVESTGVFTDKDK;SDLDIVSNASCTTNCLAPLAK;TLLFGEKPVTVFGIR;VPTVDVSVVDLTVR;VVISAPSK;YDSVHGQWK
AT3G04790	AT3G04790.1	EMBRYO DEFECTIVE 3119 (EMB3119)	EMBRYO DEFECTIVE 3119 (EMB3119)	Ribose 5-phosphate isomerase, type A protein. Loss of function is embryo lethal.		24.7332	25.6965	24.889	26.5368	27.0098	26.9763	-1.73477	2.1462	2	2	2	10.1	10.1	10.1	15.652	21908000	75919000	39402000	14622000	22303000	25349000	31813000	66498000	35822000	87373000	115100000	103740000	11	FIVVADDTK;IDLAIDGADEVDPNLDLVK
AT3G04400	AT3G04400.2;AT2G33370.2;AT3G04400.1;AT2G33370.1;AT1G04480.1	EMBRYO DEFECTIVE 2171 (emb2171)	EMBRYO DEFECTIVE 2171 (emb2171); (RPL23);RIBOSOMAL PROTEIN UL14Y (UL14Y)	Involved in non-host resistance.		30.7029	29.7643	30.6045	27.212	27.6801	28.0649	2.70488	2.90419	8	8	8	71.2	71.2	71.2	154.86	1373000000	1273100000	2070399999.9999998	23348000	35493000	53908000	630890000	433710000	684400000	58249000	83885000	90712000	136	DGVFMYFEDNAGVIVNPK;ECADLWPR;GSAITGPIGK;LPSACVGDMVMATVK;MSLGLPVAATVNCADNTGAK;NLYIISVK;RKDGVFMYFEDNAGVIVNPK;VLPAVIVR
AT4G31700	AT4G31700.1	RIBOSOMAL PROTEIN S6 (RPS6)	RIBOSOMAL PROTEIN S6 (RPS6); (RPS6A); (ATRPS6);RIBOSOMAL PROTEIN ES6Z (ES6Z)	Encodes a putative ribosomal protein S6 (rps6a). RPS6A and RPS6B are fully redundant and essential during gametogenesis.		32.6336	31.73	32.6637	28.9917	30.1308	29.8083	2.69884	2.67319	11	3	0	32	9.2	0	247.13	5234400000	4972700000	8628600000	80166000	194030000	180490000	5384700000	2821700000	5147500000	420220000	781470000	602740000	61	FNVANPTTGCQK;GCIVSPDLSVLNLVIVK;GENDLPGLTDTEKPR;KGENDLPGLTDTEKPR;KLEIDDDQK;KLEIDDDQKLR;LEIDDDQK;LEIDDDQKLR;LVTPLTLQR;QGVLTPGR;TYVNTYR
AT3G47370	AT3G47370.3;AT3G47370.2;AT3G47370.1	RIBOSOMAL PROTEIN US10Y (US10Y)	RIBOSOMAL PROTEIN US10Y (US10Y)	Ribosomal protein S10p/S20e family protein;(source:Araport11)		25.8261	25.8002	26.1269	23.0374	25.7996	20.8199	2.69879	0.997247	6	1	1	40.2	9.8	9.8	3.5255	46732000	81573000	92934000	0	0	0	67861000	71449000	84492000	0	0	0	9	AGLEAPLEQIHK;KAPCGEGTNTWDR;KAPCGEGTNTWDRFELR;RVIDLFSSPDVVK;VCTDLVR;VIDLFSSPDVVK
AT5G10360	AT5G10360.1;AT5G10360.2	EMBRYO DEFECTIVE 3010 (EMB3010)	EMBRYO DEFECTIVE 3010 (EMB3010);RIBOSOMAL PROTEIN ES6Y (ES6Y);RIBOSOMAL PROTEIN SMALL SUBUNIT 6B (RPS6B)	RPS6A and RPS6B are fully redundant and essential during gametogenesis.		34.1084	33.5188	33.7223	30.4742	31.5407	31.247	2.69592	2.6439	18	18	10	45.4	45.4	22.5	323.31	14549000000	17183000000	17973000000	224010000	515570000	489270000	4744700000	3311999999.9999995	3659099999.9999995	575500000	731410000	699730000	421	FNVANPTTGCQK;GCIVSPDLSVLNLVIVK;GVSDLPGLTDTEKPR;KGVSDLPGLTDTEKPR;KLEIDDDQK;KLEIDDDQKLR;KLFNLGK;KLFNLGKEDDVR;KYVNTYR;LEIDDDQK;LEIDDDQKLR;LFNLGKEDDVR;LFNLGKEDDVRK;LSQEVSGDALGEEFK;LSQEVSGDALGEEFKGYVFK;LVTPLTLQR;QGVLTPGR;RLSQEVSGDALGEEFK
AT3G05560	AT3G05560.3;AT3G05560.2;AT3G05560.1	RIBOSOMAL PROTEIN EL22Z (EL22Z)	RIBOSOMAL PROTEIN EL22Z (EL22Z)	Ribosomal L22e protein family;(source:Araport11)		29.4213	28.7436	29.3943	30.6571	30.2411	29.5674	-0.968801	1.4317	7	2	2	50	20.2	20.2	13.634	564760000	627500000	894880000	254290000	209450000	152740000	383770000	265610000	396790000	642290000	459070000	188100000	88	AGALGDSVTITR;GVSFTIDCSKPVDDK;IMEIASLEK;ITVTADGQFSK;ITVTADGQFSKR;KGVSFTIDCSKPVDDK;YFNIAENEGEEED
AT3G04840	AT3G04840.1	RIBOSOMAL PROTEIN ES1Z (ES1Z)	RIBOSOMAL PROTEIN ES1Z (ES1Z)	Ribosomal protein S3Ae;(source:Araport11)		32.4972	31.9113	32.66	29.6608	29.9172	29.4404	2.68338	3.16404	16	16	9	61.5	61.5	38.2	323.31	4762400000	5638900000	8606300000	127470000	167330000	139870000	1354600000	936330000	1509999999.9999998	261190000	277190000	201710000	254	APSIFTHR;ATQGIYPLQNVFIR;EASSCDLKDLVAK;KAVDPFSK;KDWYDVK;KWQTLIEAHVDVK;LMDVHGDYSAEDVGVK;LRAEDVQGR;NVLCQFWGMDFTTDK;NVLCQFWGMDFTTDKLR;TCYAQSSQIR;TTDSYTLR;VDRPADEMAVEEPTEIIGA;VFEVSLADLQGDEDNAYR;VFEVSLADLQGDEDNAYRK;WQTLIEAHVDVK
AT3G06050	AT3G06050.1;AT3G06050.2	PEROXIREDOXIN IIF (PRXIIF)	PEROXIREDOXIN IIF (PRXIIF);PEROXIREDOXIN IIF (ATPRXIIF)	Encodes a mitochondrial matrix localized peroxiredoxin involved in redox homeostasis. Knockout mutants have reduced root growth under certain oxidative stress conditions.		22.6904	24.2096	23.6334	23.4767	24.0503	25.0836	-0.692366	0.764099	2	2	2	14.9	14.9	14.9	7.1959	5316900	27086000	16503000	1753100	2867100	6826400	7929200	14031000	7937400	10278000	12215000	15668000	4	DAIEFYGDFDGK;LAEGTDITSAAPGVSLQK
AT5G02500	AT5G02500.1;AT5G02500.2	HEAT SHOCK COGNATE PROTEIN 70-1 (HSC70-1)	ARABIDOPSIS THALIANA HEAT SHOCK COGNATE PROTEIN 70-1 (AT-HSC70-1);HEAT SHOCK PROTEIN 70-1 (HSP70-1); (AtHsp70-1);HEAT SHOCK COGNATE PROTEIN 70 (HSC70);HEAT SHOCK COGNATE PROTEIN 70-1 (HSC70-1)	Encodes a member of heat shock protein 70 family. Hsc70-1 negatively regulates the expression of Hsp101 through HsfA1d, HsfA1e and HsfA2. During non-HS condition, Hsc70-1 attenuates the activity of HsfAs and finally affects the expression of HsfA2 and Hsp101 genes. hsc70-1 mutant showed thermotolerance phenotype due to higher expression of Hsp101 and other HS inducible genes.		29.1562	29.3474	28.9487	27.0687	26.9405	25.4295	2.67125	1.79879	33	12	11	63.9	25.8	23.5	267.83	469980000	953620000	657070000	21140000	21256000	8675800	176990000	200000000	166520000	27866000	30748000	7992100	87	ARFEELNMDLFR;ATAGDTHLGGEDFDNR;EFAAEEISSMVLIK;EIAEAYLGVTIK;ELESICNPIIAK;EQVFSTYSDNQPGVLIQVYEGER;FEELNMDLFR;FSDSSVQSDMK;GEGPAIGIDLGTTYSCVGVWQHDR;GEGPAIGIDLGTTYSCVGVWQHDRVEIIANDQGNR;GVPQITVCFDIDANGILNVSAEDKTTGQK;IEDSIEQAIQWLEGNQLAEADEFEDK;IINEPTAAAIAYGLDK;IINEPTAAAIAYGLDKK;IQAGPADKPMIYVEYK;IQAGPADKPMIYVEYKGEEK;ITITNDK;ITITNDKGR;KIEDSIEQAIQWLEGNQLAEADEFEDK;KIEDSIEQAIQWLEGNQLAEADEFEDKMK;LSKDEIEK;MKELE…
AT1G41880	AT1G41880.2;AT1G41880.1	RIBOSOMAL PROTEIN EL33Z (EL33Z)	RIBOSOMAL PROTEIN EL33Z (EL33Z)	Ribosomal protein L35Ae family protein;(source:Araport11)		28.5156	28.055	29.0031	25.7078	25.6915	26.1844	2.66331	2.87888	3	3	1	40.5	40.5	22.5	272.34	301470000	389320000	682320000	8231100	8943500	14641000	191930000	175250000	321170000	28245000	34848000	19882000	44	FTSNLPPK;SNQYPNTSLIQIEGVNTQEEVNWYK;VTRPHGNSGVVR
AT5G49460	AT5G49460.2;AT5G49460.1;AT3G06650.2;AT3G06650.1	ATP CITRATE LYASE SUBUNIT B 2 (ACLB-2)	ATP CITRATE LYASE SUBUNIT B 2 (ACLB-2)	One of the two genes encoding subunit B of the cytosolic enzyme ATP Citrate Lyase (ACL)		26.633	27.0952	26.9683	27.37	27.2199	27.6775	-0.523643	1.57513	8	8	8	18.9	18.9	18.9	68.5	81754000	200160000	166520000	26051000	25798000	41214000	27717000	41768000	38850000	52688000	67863000	62897000	38	ETPSVAGIINPGSEGFQK;FGGAIDDAAR;FNNIPQIK;HPWEDVLYTK;IGDTAGTIDNIIQCK;LYRPGSVGFVSK;VTDGIYEGIAIGGDVFPGSTLSDHILR;VVAIIAEGVPESDTK
AT1G04270	AT1G04270.2;AT1G04270.1	CYTOSOLIC RIBOSOMAL PROTEIN S15 (RPS15)	CYTOSOLIC RIBOSOMAL PROTEIN S15 (RPS15);RIBOSOMAL PROTEIN US19U (US19U)	Encodes cytosolic ribosomal protein S15.		30.2981	29.7414	30.0651	27.0785	27.5024	27.5467	2.65903	3.85783	7	7	2	59.6	59.6	8.6	125.67	1037099999.9999999	1253100000	1424600000	21285000	31379000	37640000	492170000	394370000	501620000	88320000	91258000	87557000	117	ADVEPEVAAAGVPK;EAPQGEKPEPVR;GVDLDALLDMSTDDLVK;NMIIVPEMIGSIIGVYNGK;REAPQGEKPEPVR;TFNQVEIKPEMIGHYLAEFSISYK;TFNQVEIKPEMIGHYLAEFSISYKPVK
AT4G35060	AT4G35060.1	HEAVY METAL ASSOCIATED ISOPRENYLATED PLANT PROTEIN 25 (HIPP25)	HEAVY METAL ASSOCIATED ISOPRENYLATED PLANT PROTEIN 25 (HIPP25);HEAVY METAL ASSOCIATED PROTEIN 39 (ATHMP39)	Heavy metal transport/detoxification superfamily protein;(source:Araport11)		25.1135	24.6885	24.1318	21.1338	20.5996	24.2259	2.65818	1.168	2	2	2	13.7	13.7	13.7	3.5669	28517000	37749000	23312000	345570	0	0	22851000	19378000	16525000	3783500	0	0	5	VLIDCEGCER;VTVVGYVEPNK
AT3G06860	AT3G06860.1	MULTIFUNCTIONAL PROTEIN 2 (MFP2)	MULTIFUNCTIONAL PROTEIN 2 (MFP2);MULTIFUNCTIONAL PROTEIN 2 (ATMFP2)	Encodes a multifunctional protein. Involved in peroxisomal fatty acid beta oxidation. Loss-of-function mutant lacks hydroxyacyl-CoA dehydrogenase activity and have reduced levels of long-chain enoyl-CoA hydratase activity. The mutant has fewer but larger peroxisomes. The mRNA is cell-to-cell mobile.		27.2678	27.4224	27.2643	28.0086	28.4508	27.3289	-0.611235	1.00138	8	8	8	15.3	15.3	15.3	30.95	126940000	251130000	204440000	40555000	60553000	32366000	101300000	123140000	101670000	71904000	77035000	71135000	21	FSGGFDISGFGEMQK;GSLDYESFR;ISAPAAQLGLPELQLGVIPGFGGTQR;QQIFADLEK;SNYEEALSR;TPVVVGNCTGFAVNR;VFAEGIAVK;YCPQHCILASNTSTIDLNK
AT1G07070	AT1G07070.1	RIBOSOMAL PROTEIN EL33W (EL33W)	RIBOSOMAL PROTEIN EL33W (EL33W)	Ribosomal protein L35Ae family protein;(source:Araport11)		24.7328	23.4518	25.5608	20.7938	23.788	21.1985	2.65504	1.35982	3	1	1	40.2	22.3	22.3	17.983	21903000	16018000	62769000	0	0	0	16308000	14181000	31979000	0	0	0	6	FTSNLPPK;SNQYPNTSLVQVEGVNTTEEVSWYK;VTRPHGNSGVVR
AT1G48830	AT1G48830.2;AT1G48830.1	RIBOSOMAL PROTEIN ES7Z (ES7Z)	RIBOSOMAL PROTEIN ES7Z (ES7Z)	Ribosomal protein S7e family protein;(source:Araport11)		29.0655	28.3743	29.2489	26.032	26.3796	26.347	2.64337	2.66766	8	8	8	58.1	58.1	58.1	273.04	441340000	485790000	809040000	10305000	14409000	0	212700000	135110000	246820000	30183000	23627000	0	44	AIVVNVPYR;DVILIATR;DVVFEFPITEA;GVELSELDEQVAQAFFDLENTNQELK;NNTEYKVEAFSAVYK;SELKDLYVNSAVQVDISGGR;TLTSVHEAILDDVVLPAEIVGK;VEAFSAVYK
AT2G18020	AT2G18020.1	EMBRYO DEFECTIVE 2296 (EMB2296)	EMBRYO DEFECTIVE 2296 (EMB2296);RIBOSOMAL PROTEIN UL2Z (UL2Z)	Ribosomal protein L2 family;(source:Araport11)		32.2194	31.3677	32.1345	28.7751	29.6999	29.3171	2.64316	2.94445	9	9	2	39.1	39.1	14.3	287.61	3928099999.9999995	3868499999.9999995	5979099999.999999	68993000	143930000	128410000	1355700000	825940000	1307500000	169030000	283460000	191060000	165	AMIGQVAGGGR;ASGDYAIVIAHNPDSDTTR;ATLVVGNVLPLR;ELFVAAEGMYTGQFLYCGK;GVVTEIIHDPGR;KATLVVGNVLPLR;QKELFVAAEGMYTGQFLYCGK;SIPEGAVVCNVEHHVGDR;SLDFGER
AT3G08030	AT3G08030.2;AT3G08030.1	(ATHA2-1)	(ATHA2-1)	The mRNA of this gene is expressed in viable seeds. Its detection in a dry seed lot has potential for use as a molecular marker for germination performance as absence of expression correlates with decreased germination. Encodes DUF642 cell wall protein.		25.2713	23.3574	25.9446	24.594	23.1628	24.4645	0.784041	0.654371	4	4	4	26	26	26	16.411	31813000	15004000	81903000	3803200	0	0	18088000	10828000	26447000	20021000	0	0	11	KTDTVSLCGPVIDEIVVSHVA;TSPGQTYTLSFVVGDAK;TSQVTVTFHNPGVQEDPACGPLLDAVAIK;YFNVPFGHAAIELVAGK
AT1G04510	AT1G04510.2;AT1G04510.1	MOS4-ASSOCIATED COMPLEX 3A (MAC3A)	MOS4-ASSOCIATED COMPLEX 3A (MAC3A);PLANT U-BOX 59 (PUB59)	Encodes MAC3A, a U-box proteins with homology to the yeast and human E3 ubiquitin ligase Prp19. Associated with the MOS4-Associated Complex (MAC). Involved in plant innate immunity. Regulator of flowering time.		25.3678	25.35	25.6544	23.2797	22.3454	22.8258	2.64041	2.58007	3	2	2	6.1	4	4	10.812	34013000	59707000	66979000	0	0	0	29567000	40848000	40045000	0	0	0	2	FTQLSSHPLHK;IWGCSEDGNYTSR;QLLAEAER
AT3G08530	AT3G08530.1	CLATHRIN HEAVY CHAIN 2 (CHC2)	CLATHRIN HEAVY CHAIN 2 (CHC2); (ATCHC2)	CHC2 heavy chain subunit of clathrin. Involved in vesicle mediated trafficking. Mutants show reduced rates of endocytosis and defects clathrin mediated exocytosis Mutants have increased drought tolerance due to defects in stomatal movement.		27.0181	27.0057	26.9914	26.0026	26.3103	26.2383	0.821333	2.21759	14	14	2	12	12	2.1	49.334	106770000	188130000	169200000	10097000	13734000	15198000	21847000	36351000	35283000	20504000	20282000	22634000	44	EATSFLLDVLKPNLPEHAFLQTK;EGLVSDAIESFIR;ESIDLHDSFDQIGLAQK;EVCFACVDAEEFR;GNLPGAENLVVQR;HYSELPDIKR;LYDEALYEAAK;NLLENWLAEDKLECSEELGDLVK;TANLANNQIINYK;VAAYIYK;VDSELIYAYAK;VNPGNAPLVVGQLLDDECPEDFIK;VSEDTDVYDDLVK;WLVLIGIAPGSPER
AT3G08580	AT3G08580.2;AT3G08580.1	ADP/ATP CARRIER 1 (AAC1)	ADP/ATP CARRIER 1 (AAC1)	mitochondrial ADP/ATP carrier		31.8114	31.421	31.5785	30.9612	31.1517	30.7969	0.633677	2.13639	16	16	11	42.5	42.5	26	81.513	2960399999.9999995	4014099999.9999995	4066899999.9999995	313970000	393720000	358150000	999820000	748280000	795090000	599830000	646360000	461320000	191	AVAGAGVLSGYDK;DEGFGSLWR;DRDGYWK;GFNISCVGIIVYR;GFTNFALDFLMGGVSAAVSK;GIGDCFGR;GNTANVIR;LQLIVFGK;LSEPYKGIGDCFGR;QFDGLVDVYR;QFDGLVDVYRK;TAAAPIER;TDGIAGLYR;TIKDEGFGSLWR;WFAGNLASGGAAGASSLLFVYSLDYAR;YFPTQALNFAFK
AT3G11510	AT3G11510.1	RIBOSOMAL PROTEIN US11Y (US11Y)	RIBOSOMAL PROTEIN US11Y (US11Y)	Ribosomal protein S11 family protein;(source:Araport11)		30.4395	29.8919	29.9385	27.1948	27.8014	27.4042	2.6232	3.63367	9	2	1	60	26	7.3	11.197	1143900000	1390900000	1304900000	23072000	38605000	34100000	1663299999.9999998	1220000000	1188000000	138050000	199490000	139740000	29	ADRDESSPYAAMLAAQDVAQR;DESSPYAAMLAAQDVAQR;EGEQVFGVVHIFASFNDTFIHVTDLSGR;IEDVTPIPTDSTR;IEDVTPIPTDSTRR;IGRIEDVTPIPTDSTR;TPGPGAQSALR;VETVTLGPSVR;VKADRDESSPYAAMLAAQDVAQR
AT3G08940	AT3G08940.2;AT3G08940.1	LIGHT HARVESTING COMPLEX PHOTOSYSTEM II (LHCB4.2)	LIGHT HARVESTING COMPLEX PHOTOSYSTEM II (LHCB4.2)	Lhcb4.2 protein (Lhcb4.2, protein involved in the light harvesting complex of photosystem II The mRNA is cell-to-cell mobile.		29.0745	28.7314	28.9155	29.0593	28.7327	29.4658	-0.178778	0.598995	10	10	8	47.7	47.7	35.5	139.3	444100000	622210000	642130000	84014000	73619000	142350000	165470000	143090000	143210000	174350000	151060000	222760000	91	AQLQLAEIK;FFDPLGLASDPVKK;FRECELIHGR;GPLNNWATHLSDPLHTTIIDTFSSS;NLYGEVIGTR;PAEYLQFDLDSLDQNLAK;SPEYLDGSLVGDYGFDPFGLGK;SPEYLDGSLVGDYGFDPFGLGKPAEYLQFDLDSLDQNLAK;STPFQPYSEVFGLQR;TVISDRPLWFPGAK
AT3G08970	AT3G08970.2;AT3G08970.1	(ATERDJ3A)	(ATERDJ3A);THERMOSENSITIVE MALE STERILE 1 (TMS1)	J domain protein localized in ER lumen. Can compensate for the growth defect in jem1 scj1 mutant yeast. Also shows similarity to HSP40 proteins and is induced by heat stress. At high temperatures, mutant alleles are not transmitted through the pollen due to defects in pollen tube growth.		27.0317	27.3751	27.9498	28.0573	27.4876	27.3818	-0.190027	0.517238	8	8	8	16.8	16.8	16.8	64.117	107780000	243020000	328790000	41948000	31060000	33574000	42978000	65104000	82338000	69477000	56506000	46243000	32	ATLAEYTEELVAK;FAEINNAYEILSDEEK;FAEINNAYEILSDEEKR;FVAAVLNGDIQFTK;FVFYNTEVHDTSDPK;GKEQFGGFGSSSNAESK;LNCETESSLCK;SFCQEHLPR
AT3G09200	AT3G09200.2;AT3G09200.1	RIBOSOMAL PROTEIN UL10Y (UL10Y)	RIBOSOMAL PROTEIN UL10Y (UL10Y)	Ribosomal protein L10 family protein;(source:Araport11)		28.4616	27.9781	27.6902	27.6113	28.4078	27.667	0.147941	0.463774	11	11	5	74.6	74.6	34.8	123.02	290390000	369120000	274650000	30794000	58775000	40914000	147500000	144270000	143030000	74797000	106700000	66593000	51	FAVASVAAVSADAGGGAPAAAK;GDLKEVSEEVAK;GTVEIITPVELIK;IHSENTGNTAILNLLPLLQGNVGLIFTK;KIAYDTK;LGIRPFSYGLVVQSVYDNGSVFSPEVLDLTEDQLVEK;NALAIAVATEYTFPQAEK;VEEKEESDEEDYGGDFGLFDEE;VGLVAPIDVVVQPGNTGLDPSQTSFFQVLNIPTK;VGSSEAALLAK;VKEYLKDPSK
AT3G09260	AT3G09260.1	(PYK10)	(PYK10); (PSR3.1); (BGLU23);LONG ER BODY (LEB)	Encodes beta-glucosidase.The major constituent of ER bodies. One of the most abundant proteins in Arabidopsis seedlings. Exist in an soluble (inactive) and non-soluble (active) form, most probably formed in a polymerization process. Involved in the mutualistic interaction between Arabidopsis and the endophytic fungus Piriformospora indica.		28.9234	29.4749	29.7083	32.3221	32.2943	31.0546	-2.5215	2.22406	17	17	15	49.6	49.6	46.4	323.31	399930000	1041699999.9999999	1112400000	806410000	869250000	428190000	212420000	333200000	347630000	1163700000	1246100000	688400000	142	ALDFILGWHLDTTTFGDYPQIMK;ASTDFVGLNYYTSVFSNHLEKPDPSKPR;CNNDNGDVAVDFFHR;EKGVSQAGVQFYHDLIDELIK;EYADFVFQEYGGK;GPALWDIYCR;GVSQAGVQFYHDLIDELIK;HLLSMQEAVCIDK;HWITFNEPWVFSHAGYDVGK;IGIAHSPAWFEAHDLADSQDGASIDR;MSIAWPR;NGITPFVTVFHWDTPQDLEDEYGGFLSER;NLNTDAFR;SGYEAYLVTHNLLISHAEAVEAYR;VKHWITFNEPWVFSHAGYDVGK;WMQDSLITWESK;YKEDIQLMK
AT3G27850	AT3G27850.1;AT3G27830.2;AT3G27830.1	RIBOSOMAL PROTEIN L12-C (RPL12-C)	RIBOSOMAL PROTEIN L12-C (RPL12-C);RIBOSOMAL PROTEIN BL12CX (BL12CX)	50S ribosomal protein L12-C The mRNA is cell-to-cell mobile.		28.5323	28.2463	28.543	26.1898	25.6712	25.6476	2.60436	3.37467	6	6	6	47.6	47.6	47.6	52.109	304970000	444550000	496020000	11496000	8818400	10092000	194270000	179660000	182130000	98647000	63007000	34467000	58	EGITKDEAEEAK;EGITKDEAEEAKK;ELIEGLPK;FGVSPLSLAPAAAAVAAPADGGAAAVVEEQTEFDVVINEVPSSSR;IGSEISSLTLEEAR;ILVDYLQDK
AT2G20450	AT2G20450.1	RIBOSOMAL PROTEIN EL14Z (EL14Z)	RIBOSOMAL PROTEIN EL14Z (EL14Z)	Ribosomal protein L14;(source:Araport11)		28.795	27.9934	28.6906	25.991	25.6235	26.0602	2.60147	2.8941	6	2	2	41	14.9	14.9	9.4274	365880000	373070000	549450000	10016000	8531700	13433000	542330000	333560000	509910000	41859000	32175000	38921000	11	ALVDAPDMER;LSLTDIVIDINR;LVVIVDVVDQNR;RLSLTDIVIDINR;VALVNYGEDYGK;VLIEAMEK
AT5G02870	AT5G02870.1;AT5G02870.2	RIBOSOMAL LARGE SUBUNIT 4 (RPL4)	RIBOSOMAL LARGE SUBUNIT 4 (RPL4);RIBOSOMAL PROTEIN UL4Y (UL4Y)	Ribosomal protein L4/L1 family;(source:Araport11)		31.9529	31.24	31.6558	28.7668	29.606	28.6724	2.60114	2.82122	22	8	8	47.7	17.4	17.4	113.36	3265499999.9999995	3540699999.9999995	4290599999.9999995	68597000	134860000	82132000	1959799999.9999998	1403300000	1784399999.9999998	206720000	264080000	182680000	140	AGHQTSAESWGTGR;AGQAAFGNMCR;AWYQTMISDSDYTEFDNFTK;GHKIENVPEMPLVVSDSAEAVEK;GPLVVFGTEGAK;IENVPEMPLVVSDSAEAVEK;IINSDEVQSVVNPIK;IINSDEVQSVVNPIKDGSK;KAGHQTSAESWGTGR;KGPLVVFGTEGAK;KGYVLPR;KVVTKEEAQAIK;LAPGGHLGR;LESIYGSFEK;LESIYGSFEKPSEK;MVNADLAR;NLNVMFK;NLPGVELCHVER;NSIGIRPGK;QIGAYDDAEK;SAFEKLESIYGSFEKPSEK;VVTKEEAQAIK
AT3G09820	AT3G09820.1;AT3G09820.2	ADENOSINE KINASE 1 (ADK1)	ADENOSINE KINASE 1 (ADK1); (ATADK1)	Involved in the salvage synthesis of adenylates and methyl recycling		27.7671	27.5451	27.0864	26.7855	27.412	26.8644	0.445553	1.02672	6	6	1	22.4	22.4	4.4	86.105	179440000	273410000	180720000	17373000	29473000	23457000	65760000	65779000	66513000	62461000	79253000	53085000	27	AGCYASNVVIQR;KPENWALVEK;LNNAILAEDK;SGCTYPEKPDFN;TTVITQGADPVVVAEDGK;VHGWETDDVEQIAIK
AT3G09840	AT3G09840.1;AT5G03340.1;AT3G53230.1	(CDC48A)	CELL DIVISION CYCLE 48 (CDC48); (ATCDC48A); (CDC48A); (ATCDC48)	Encodes a cell division cycle protein, a member of AAA-type ATPases gene family. Expressed throughout the plant in regions of cell division. Within the cell, sub-cellular localization varies depending on the stage of the cell cycle.Mutants in which the expression of CDC48A is altered show defects in cytokinesis, cell expansion and cell differentiation. The mRNA is cell-to-cell mobile.		24.4746	25.6097	24.5201	26.5133	26.3289	26.6287	-1.6222	1.67473	9	9	9	17.1	17.1	17.1	59.788	18313000	71484000	30512000	14386000	13912000	19921000	10646000	17861000	9850600	36667000	40722000	32092000	24	AIANECQANFISVK;EIDIGVPDEIGR;GILLYGPPGSGK;LAGESESNLR;LDQLIYIPLPDEDSR;NAPSIIFIDEIDSIAPK;QSAPCVLFFDELDSIATQR;TVFIIGATNRPDIIDSALLRPGR;YTQGFSGADITEICQR
AT3G10020	AT3G10020.1;AT3G10020.2	HYPOXIA RESPONSE UNKNOWN PROTEIN 26 (HUP26)	HYPOXIA RESPONSE UNKNOWN PROTEIN 26 (HUP26)	plant/protein;(source:Araport11)		24.2985	24.9953	24.768	27.1727	26.8623	27.9787	-2.65066	2.63155	6	6	6	35.6	35.6	35.6	19.022	16209000	46692000	36232000	22721000	20135000	50781000	12729000	16973000	14372000	53690000	47170000	73838000	16	HPSDGIPLR;MQAVSVDETK;SGDDVAVELVK;SGDDVAVELVKGEVEVAK;SVDKFEVK;YTWEGPDR
AT5G20290	AT5G20290.1	RIBOSOMAL PROTEIN ES8Z (ES8Z)	RIBOSOMAL PROTEIN ES8Z (ES8Z)	Ribosomal protein S8e family protein;(source:Araport11)		32.5144	31.8925	32.8917	29.4777	30.0014	30.0176	2.60063	2.78046	12	12	12	53.2	53.2	53.2	309.68	4819300000	5565800000	10106000000	112280000	177390000	208670000	1394000000	1030199999.9999999	1684799999.9999998	178050000	202230000	184550000	204	ADGYILEGK;DGEEGEEAAVAAPEEVK;DGEEGEEAAVAAPEEVKK;ELEFYMK;KDGEEGEEAAVAAPEEVK;KDGEEGEEAAVAAPEEVKK;LDTGNYSWGSEATTR;LLACISSRPGQCGR;QWYLSHYGVELGR;SAIVQVDAAPFK;SLDSHIEDQFASGR;VLDVVYNASNNELVR
AT3G10920	AT3G10920.2;AT3G10920.1	MANGANESE SUPEROXIDE DISMUTASE 1 (MSD1)	MANGANESE SUPEROXIDE DISMUTASE 1 (MSD1);MATERNAL EFFECT EMBRYO ARREST 33 (MEE33);ARABIDOPSIS MANGANESE SUPEROXIDE DISMUTASE 1 (ATMSD1);SUPEROXIDE DISMUTASE 1 (ATSOD1)	manganese superoxide dismutase (MSD1)		22.6506	22.0305	23.3419	23.7126	24.5978	24.0851	-1.45751	1.69941	2	2	2	14.3	14.3	14.3	3.6399	5172300	5980900	13483000	0	0	3416800	0	7565400	6258200	0	0	24392000	2	HHQAYVTNYNNALEQLDQAVNK;YASEVYEKENN
AT3G11130	AT3G11130.1	CLATHRIN HEAVY CHAIN 1 (CHC1)	(ATCHC1);HOT ABA DEFICIENCY SUPPRESSOR 1 (HAS1);CLATHRIN HEAVY CHAIN 1 (CHC1); (HAS1)	CHC1 heavy chain subunit of clathrin. Involved in vesicle mediated trafficking. Mutants show reduced rates of endocytosis and defects clathrin mediated exocytosis. Mutants also have increased dehydration tolerance which may be related to the overall slower stomatal aperture dynamics. Overall growth is affected.		21.2287	21.3607	20.9894	21.1537	21.7292	20.9411	-0.0817496	0.412046	13	1	1	11.3	1.3	1.3	5.1979	1930400	3759600	0	0	0	0	2527500	2814000	0	0	0	0	2	EATAFLLDVLKPNLPEHAFLQTK;EGLVSDAIESFIR;ESIDLHDSFDQIGLAQK;EVCFACVDAEEFR;GNLPGAENLVVQR;HYSELPDIKR;LYDEALYEAAK;NLLENWLAEDKLECSEELGDLVK;TANLANNQIINYK;VAAYIYK;VDSELIYAYAK;VNPGNAPLVVGQLLDDECPEDFIK;WLVLIGIAPGSPER
AT3G11250	AT3G11250.1	RIBOSOMAL PROTEIN UL10X (UL10X)	RIBOSOMAL PROTEIN UL10X (UL10X)	Ribosomal protein L10 family protein;(source:Araport11)		23.8886	23.3742	23.18	24.916	23.4338	24.5061	-0.80439	0.993068	7	1	1	44	8.7	8.7	11.501	12200000	15179000	12052000	0	0	0	17716000	13295000	10957000	0	0	0	6	GDLKEVSEEVAK;GTVEIITPVELIK;IHSENSGNTAILNLLPLLQGNVGLIFTK;KIAYDTK;LGIRPFSYGLVVQSVYDNGSVFSPEVLDLTEDQLVEK;VGLVAPIDVVVQPGNTGLDPSQTSFFQVLNIPTK;VGSSEAALLAK
AT1G45201	AT1G45201.3;AT1G45201.1;AT1G45201.2	0	0	Target of AtGRP7 regulation.		27.3877	27.0141	27.0154	23.2382	25.0394	25.34	2.59982	1.57091	6	6	6	15.5	15.5	15.5	20.362	137940000	189220000	172040000	1486000	5691400	8154300	55665000	57474000	50634000	4757600	12175000	15519000	23	INVGSIEYK;LTQAFVFK;SSATYTSFIGCSDR;TSSTNPDLIVVSFR;VGDEDFGEFMK;VVGIVFPGGSNHFPFDYVNSTR
AT3G11630	AT3G11630.1	2-CYS PEROXIREDOXIN A (2CPA)	2-CYS PEROXIREDOXIN A (2CPA)	Encodes a 2-Cys peroxiredoxin (2-Cys PrxA) that contains two catalytic Cys residues. Functions in redox cascade with TrxL2 via the ferredoxin-thioredoxin reductase (FTR)/thioredoxin (Trx) pathway to mediate the light-responsive reductive control of target proteins. Continuously transfers reducing power from TrxL2 to H2O2.		26.0794	27.2313	26.6205	28.8327	28.538	28.3972	-1.94561	2.05347	7	7	3	49.2	49.2	21.1	161.01	55699000	219970000	130840000	71804000	64327000	67870000	39630000	84236000	46769000	130750000	103390000	156160000	57	APDFEAEAVFDQEFIK;AQADDLPLVGNK;GLFIIDKEGVIQHSTINNLGIGR;LNTEVLGVSVDSVFSHLAWVQTDR;SFGVLIHDQGIALR;SGGLGDLNYPLISDVTK;TLQALQYIQENPDEVCPAGWKPGEK
AT3G11830	AT3G11830.2;AT3G11830.1	CHAPERONIN CONTAINING T-COMPLEX POLYPEPTIDE-1 SUBUNIT 7 (CCT7)	CHAPERONIN CONTAINING T-COMPLEX POLYPEPTIDE-1 SUBUNIT 7 (CCT7)	TCP-1/cpn60 chaperonin family protein;(source:Araport11)		23.8774	23.8137	22.9585	23.9162	24.5223	23.4129	-0.400566	0.687067	3	3	3	11.5	11.5	11.5	25.692	12106000	20585000	10337000	2377500	3976800	2144100	8324200	10864000	12121000	12496000	15969000	9063300	7	AQLVSNINACTAVGDVVR;QLCDNAGFDATDVLNK;VAAAAGGTVQTSVNNIIDEVLGTCEIFEEK
AT3G11910	AT3G11910.4;AT3G11910.2;AT3G11910.3;AT3G11910.1	UBIQUITIN-SPECIFIC PROTEASE 13 (UBP13)	UBIQUITIN-SPECIFIC PROTEASE 13 (UBP13); (AtUBP13)	Ubiquitin-specific protease, which together with UBP12 deubiquitinates DA1, DAR1 and DAR2, hence reducing their peptidase activity. Works upstream of DA1, DAR1 and DAR2 to restrict their protease activity and hence fine-tune plant growth and development.		22.9703	22.4588	22.7462	23.5582	23.1239	24.276	-0.927577	1.33103	3	1	1	5	2.6	2.6	5.5254	6455700	8048000	0	0	0	0	8206100	6785900	0	0	0	0	2	EAGQNQQVQNFGEPFFLVIHEGETLEEIK;IENINDQYWTLR;IICNVDEKDIAEHLR
AT4G29040	AT4G29040.1;AT2G20140.1	REGULATORY PARTICLE AAA-ATPASE 2A (RPT2a)	REGULATORY PARTICLE AAA-ATPASE 2A (RPT2a)	RPT2a encodes the 26S proteasome subunit. It is required for root meristem maintenance, and regulates gametogenesis. RPT2a is also shown to regulate gene silencing via DNA methylation.		25.3357	25.0922	25.4307	20.9781	23.7337	23.3787	2.58936	1.328	3	3	3	11.3	11.3	11.3	16.493	33264000	49937000	57358000	0	0	2094000	21938000	22241000	19600000	0	0	18700000	10	APLESYADIGGLEAQIQEIK;VADDLSPSIVFIDEIDAVGTK;VVGSELIQK
AT3G12050	AT3G12050.1	0	0	Aha1 domain-containing protein;(source:Araport11)		25.2728	25.5723	25.1742	25.3121	25.626	25.8693	-0.262705	0.875571	2	2	2	7.5	7.5	7.5	12.083	31846000	69654000	48016000	6256600	8546700	11768000	27801000	29503000	26154000	37709000	44486000	28760000	14	QFSGVDILSGEGNLFIK;VEGEAYVNVR
AT3G12110	AT3G12110.1	ACTIN-11 (ACT11)	ACTIN-11 (ACT11)	Encodes an actin that is expressed predominantly during reproductive development.		27.069	26.5354	26.0411	26.4812	26.0325	26.6637	0.156025	0.466162	10	2	1	35.3	7.7	4.2	25.375	110600000	135790000	87566000	14069000	11328000	20410000	67915000	54209000	63711000	57575000	32315000	30905000	13	ADGEDIQPLVCDNGTGMVK;AEYDESGPSIVHR;AGFAGDDAPR;DAYVGDEAQSK;DLTDYLMK;HTGVMVGMGQK;IWHHTFYNELR;SYELPDGQVITIGGER;VAPEEHPVLLTEAPLNPK;YPIEHGIVSNWDDMEK
AT3G12290	AT3G12290.1	METHYLENETETRAHYDROFOLATE DEHYDROGENASE/METHENYLTETRAHYDROFOLATE CYCLOHYDROLASE (MTHFD1)	METHYLENETETRAHYDROFOLATE DEHYDROGENASE/METHENYLTETRAHYDROFOLATE CYCLOHYDROLASE (MTHFD1)	MTHFD1 encodes a cytoplasmic bifunctional methylenetetrahydrofolate dehydrogenase/methenyltetrahydrofolate cyclohydrolase that is involved in one carbon metabolism and control of DNA methylation.		19.2624	22.3634	21.0667	24.3807	24.7253	24.5399	-3.65117	1.56846	2	2	2	12	12	12	4.6645	0	0	0	3280600	4577700	4683100	0	0	0	20707000	22732000	18954000	3	GNWIKPGAAVIDVGTNAVSDPSKK;LVGDVDFAEASK
AT3G12490	AT3G12490.1;AT3G12490.2	CYSTATIN B (CYSB)	CYSTATIN B (ATCYSB);CYSTATIN B (CYSB);ARABIDOPSIS THALIANA PHYTOCYSTATIN 6 (ATCYS6)	Encodes a protein with cysteine proteinase inhibitor activity. Overexpression increases tolerance to abiotic stressors (i.e.salt,osmotic, cold stress).		21.0124	23.0629	21.2587	23.2516	20.1499	23.7464	-0.604627	0.474117	2	2	2	24.7	24.7	24.7	15.343	0	12233000	0	0	0	0	0	10715000	0	0	0	0	4	ALVGGVGDVPANQNSGEVESLAR;SNSLFPYELLEVVHAK
AT2G18960	AT2G18960.1;AT2G18960.2;AT2G18960.3	H(+)-ATPASE 1 (HA1)	H(+)-ATPASE 1 (AHA1);PLASMA MEMBRANE PROTON ATPASE (PMA);OPEN STOMATA 2 (OST2);H(+)-ATPASE 1 (HA1)	Encodes a plasma membrane proton ATPase. Mutants have a reduced ability to close their stomata in response to drought and are affected in stomatal but not seed responsiveness to ABA. The mRNA is cell-to-cell mobile.		26.6763	26.743	26.6044	23.4413	24.2845	24.5532	2.58155	2.1144	17	5	5	22.1	7.9	7.9	20.857	84243000	156810000	129390000	1710700	0	4726300	31515000	41020000	34756000	7828700	0	16087000	23	ADIGIAVADATDAAR;ALNLGVNVK;EDVNIFPEK;EGLTTQEGEDR;ESPGGPWEFVGLLPLFDPPR;EVHFLPFNPVDKR;GAPEQILDLANARPDLR;HPGQEVFSGSTCK;IPIEEVFQQLK;KADIGIAVADATDAAR;LGDIIPADAR;LLEGDPLKVDQSALTGESLPVTK;MITGDQLAIGK;SGLEDIKNETVDLEK;TALTYIDSDGNWHR;VDQSALTGESLPVTK;WSEQEAAILVPGDIVSIK
AT3G12780	AT3G12780.1	PHOSPHOGLYCERATE KINASE 1 (PGK1)	PHOSPHOGLYCERATE KINASE 1 (PGK1); (PGKP1)	PGK1 was localized exclusively in the chloroplasts of photosynthetic tissues and is the photosynthetic isoform. The pgk1.1 knock-down mutant displayed reduced growth, lower photosynthetic capacity and starch content. Expression studies in PGK mutants showed that PGK1 and PGK3 were down-regulated in pgk3.2 and pgk1.1, respectively. These results indicate that the down-regulation of photosynthetic …		28.9106	29.9741	29.0303	30.7097	30.8046	31.1334	-1.57754	1.82296	17	17	9	53.6	53.6	32.2	205.29	396410000	1472399999.9999998	695330000	263730000	309540000	452220000	102960000	273810000	125310000	332130000	434130000	388820000	147	ADDCIGPEVESLVASLPEGGVLLLENVR;ADLNVPLDDNQTITDDTR;AQGLSVGSSLVEEDKLELATELLAK;FAAGTEAIANK;FLKPSVAGFLLQK;FSLAPLVPR;FYKEEEKNDPEFAK;GVSLLLPTDVVVADK;GVTTIIGGGDSVAAVEK;IGVIESLLEK;IVPASGIEDGWMGLDIGPDSIK;KLASLADLYVNDAFGTAHR;LASLADLYVNDAFGTAHR;LSELLGIEVTK;RPFAAIVGGSK;SVGDLTSADLK;VGVAGVMSHISTGGGASLELLEGK
AT4G39520	AT4G39520.1	(DRG1-1)	(DRG1-1)	Encodes a member of the DRG (developmentally regulated G-protein) family. Has GTPase activity.		25.7089	25.3621	25.4441	22.0061	22.9362	23.8307	2.58067	1.75741	3	3	3	13.6	13.6	13.6	47.536	43085000	60212000	57892000	0	0	0	28797000	20355000	24204000	0	0	0	13	GGINLTSTVAVTHLDLDTVK;IQLLDLPGIIEGAK;YDATADDLIDVIEGSR
AT5G46630	AT5G46630.1;AT5G46630.2	ADAPTOR PROTEIN-2 MU-ADAPTIN (AP2M)	ADAPTOR PROTEIN-2 MU-ADAPTIN (AP2M)	clathrin adaptor complexes medium subunit family protein, contains Pfam profile: PF00928 adaptor complexes medium subunit family; similar to micro-adaptins of clathrin coated vesicle adaptor complexes. Phosphorylated on Thr-163 by AAK1, resulting in regulation of tropic growth of roots.		26.9994	27.035	27.1516	24.6939	24.9073	23.9334	2.55046	2.2343	4	4	4	11.2	11.2	11.2	11.483	105390000	191990000	189070000	4076000	5193200	3075700	88419000	100560000	93353000	17355000	26028000	12225000	25	ITEGVNLPFR;SYFGGAFDEDAIR;TVSFVPPDGEFELMK;YNPSIDCLVWK
AT3G13470	AT3G13470.1	CHAPERONIN-60BETA2 (CPN60BETA2)	CHAPERONIN-60BETA2 (CPN60BETA2); (CPNB2)	Encodes a subunit of chloroplasts chaperonins that are involved in mediating the folding of newly synthesized, translocated, or stress-denatured proteins. Cpn60 subunits are: Cpn60alpha1 (At2g28000), AtCpn60alpha2 (At5g18820), AtCpn60beta1 (At1g55490), AtCpn60beta2 (At3g13470), AtCpn60beta3 (At5g56500), AtCpn60beta4 (At1g26230).		22.2793	23.303	22.7885	24.3857	24.526	24.7258	-1.75553	2.02635	15	1	1	32.4	3	3	5.0152	3998700	14449000	9187700	3291900	3987100	5326800	6198600	11119000	8142200	15478000	23015000	24386000	3	AAVEEGIVVGGGCTLLR;CCLEHAASVAK;DLVGVLEDAIR;EEVGLSLDK;EMTTIVGDGTTQEAVNKR;EVELEDPVENIGAK;IVNDGVTVAR;KSQYLDDIAILTGATVIREEVGLSLDK;LRVEDALNATK;LSGGVAVIQVGAQTETELK;LSGGVAVIQVGAQTETELKEK;NLIEQAEQDYEK;NLIEQAEQDYEKEK;TNDLAGDGTTTSVVLAQGFIAEGVK;YEDLMAAGIIDPTK
AT5G58420	AT5G58420.1	RIBOSOMAL PROTEIN ES4X (ES4X)	RIBOSOMAL PROTEIN ES4X (ES4X)	Ribosomal protein S4 (RPS4A) family protein;(source:Araport11)		26.4391	25.8472	25.9543	23.4807	24.7447	22.3644	2.55026	1.54282	16	1	1	58	2.7	2.7	2.0898	71475000	84275000	82452000	0	4639700	0	103790000	73816000	74962000	0	23943000	0	6	ECLPLVLIIR;EVISILMQR;FDVGNVVMVTGGR;GIPYLNTYDGR;GSFETIHIQDSTGHEFATR;HKGSFETIHIQDSTGHEFATR;LDLEANK;LGGAFAPKPSSGPHK;LGNVYTIGK;LHSIKDEEAK;LTIIEEAR;SIQFGQK;SRECLPLVLIIR;TIRYPDPLIKPNDTIK;TYPAGFMDVVSIPK;YPDPLIKPNDTIK
AT3G13790	AT3G13790.5;AT3G13790.4;AT3G13790.3;AT3G13790.2;AT3G13790.1	(ATBFRUCT1)	ARABIDOPSIS THALIANA CELL WALL INVERTASE 1 (ATCWINV1); (ATBFRUCT1); (CWI1); (ATCWI1); (CWIN1)	Encodes a protein with invertase activity. Cell wall invertase; involved in pollen development and pollen tube growth.		23.6934	23.7772	22.6576	23.0556	23.424	22.4995	0.383024	0.652124	2	2	2	4.9	4.9	4.9	6.9817	10656000	20071000	8390700	0	0	0	7180400	9117000	8258200	0	0	0	5	ALIDHSVVESFGGK;NLEEYTSVYFR
AT3G13870	AT3G13870.2;AT3G13870.1	ROOT HAIR DEFECTIVE 3 (RHD3)	ROOT HAIR DEFECTIVE 3 (RHD3);GOLGI MUTANT 8 (GOM8)	required for regulated cell expansion and normal root hair development. Encodes an evolutionarily conserved protein with putative GTP-binding motifs that is implicated in the control of vesicle trafficking between the endoplasmic reticulum and the Golgi compartments. Degraded by LNP1 and 2 to maintain a tubular ER network.		22.2417	22.6663	23.7048	24.7969	24.9551	24.0065	-1.71525	1.73	3	3	3	6.5	6.5	6.5	5.5552	3895800	9292800	17340000	4377600	5368300	3235600	9525900	5086900	6908000	16532000	11093000	17256000	4	ALDAGEGFSSSAK;LDDELDNIEK;LNVALSGPVEALLDGANDETWPAIR
AT3G13920	AT3G13920.3;AT3G13920.1;AT3G13920.2;AT3G13920.5	0	0	eukaryotic translation initiation factor 4A-1		24.7994	25.1093	24.6956	23.8388	24.4719	23.8285	0.821719	1.69803	13	2	0	48	5.2	0	4.716	22938000	50534000	34459000	2253300	3840400	2860000	16878000	25154000	16619000	20898000	29309000	17330000	15	ALGDYLGVK;DHTVSATHGDMDQNTR;FYNVVVEELPSNVADLL;GFKDQIYDIFQLLPPK;GIDVQQVSLVINFDLPTQPENYLHR;GIYAYGFEKPSAIQQR;GLDVIQQAQSGTGK;ILQAGVHVVVGTPGR;IQVGVFSATMPPEALEITR;MFVLDEADEMLSR;QFYVNVEKEEWK;RDELTLEGIK;VHACVGGTSVR
AT3G13930	AT3G13930.1	MITOCHONDRIAL PYRUVATE DEHYDROGENASE SUBUNIT 2-2 (MTE2-2)	MITOCHONDRIAL PYRUVATE DEHYDROGENASE SUBUNIT 2-2 (MTE2-2)	Encodes a subunit of the mitochondrial pyruvate dehydrogenase complex.		23.995	24.4038	24.3221	24.5476	25.1197	24.4625	-0.469603	1.15955	2	2	2	3.9	3.9	3.9	5.2226	13134000	30988000	26600000	3682900	6016800	4438300	12067000	15168000	15616000	22466000	29589000	19269000	5	ISVNDLVIK;VIDGAIGAEWLK
AT3G14067	AT3G14067.1	SENESCENCE-ASSOCIATED SUBTILISIN PROTEASE (SASP)	SENESCENCE-ASSOCIATED SUBTILISIN PROTEASE (SASP)	Encodes a protein with similarity to serine protease, subtilisin, that is upregulated during senescence and expressed in the arial portions of the plant.Loss of function mutations have increased branch number but normal silique length and seed set and therefore have increased fertility.		24.7173	23.4376	23.792	27.9534	27.7421	27.9205	-3.8897	2.39655	3	3	3	6.7	6.7	6.7	13.68	21668000	15862000	18420000	39033000	37052000	48773000	26530000	11715000	14121000	106500000	53731000	66459000	13	NVGSNVDAVYEVGVK;SALVTTAYDVENSGEPIEDLATGK;SPANVEIDVSPSK
AT3G14310	AT3G14310.1	PECTIN METHYLESTERASE 3 (PME3)	PECTIN METHYLESTERASE 3 (ATPME3);PECTIN METHYLESTERASE 3 (PME3);OVERLY ZINC SENSITIVE 2 (OZS2)	encodes a pectin methylesterase, targeted by a cellulose binding protein (CBP) from the parasitic nematode Heterodera schachtii during parasitism.		27.0702	27.2942	27.5261	27.2109	26.8787	27.2591	0.180583	0.735368	7	7	7	20.9	20.9	20.9	189.73	110690000	229770000	245120000	23331000	20365000	30838000	50562000	58232000	70279000	59919000	42998000	58853000	32	ADATVAADGSGTFK;CLIAGTVDFIFGNAAVVLQDCDIHAR;IGATSDLQSVK;NVVDGSTTFHSATVAAVGER;TDPNQNTGIVIQK;TLISSAITNQETCLDGFSHDDADK;TVAAAVAAAPENSNKR
AT3G14415	AT3G14415.3;AT3G14415.1;AT3G14415.2	GLYCOLATE OXIDASE 2 (GOX2)	GLYCOLATE OXIDASE 2 (GOX2)	Encodes a glycolate oxidase that modulates reactive oxygen species-mediated signal transduction during nonhost resistance. The mRNA is cell-to-cell mobile.		30.6017	30.4632	30.2241	32.1084	32.2043	31.8237	-1.61576	3.57742	16	16	6	57.2	57.2	21.8	215.58	1280000000	2066599999.9999998	1590599999.9999998	695350000	816690000	729710000	325590000	335690000	253480000	1004599999.9999999	1010499999.9999999	940120000	208	AASAAGTIMTLSSWATSSVEEVASTGPGIR;AIALTVDTPR;ALALGASGIFIGR;ALALGASGIFIGRPVVFALAAEGEAGVKK;DIQWLQTITNMPILVK;FTLPPNLTLK;GVLTGEDAR;MAHPDGEYATAR;MDEANDSGLASYVAGQIDR;MEITNVTEYDAIAK;NFEGLDLGK;NHIVTEWDTPR;QLDYVPATISALEEVVK;SLSEITR;VPVFLDGGVR;VVEQLVR
AT3G14420	AT3G14420.2;AT3G14420.1;AT3G14420.4;AT3G14420.5;AT3G14420.6;AT3G14420.3	GLYCOLATE OXIDASE 1 (GOX1)	GLYCOLATE OXIDASE 1 (GOX1)	Encodes a glycolate oxidase that modulates reactive oxygen species-mediated signal transduction during nonhost resistance. The mRNA is cell-to-cell mobile.		27.8418	28.2984	27.8951	29.8115	30.3233	30.4106	-2.17003	3.28518	13	3	3	45.2	6.3	6.3	68.622	188970000	460880000	316560000	141510000	221720000	274020000	203540000	331430000	158040000	506710000	823900000	855530000	29	AASAAGTIMTLSSWATSSVEEVASTGPGIR;AIALTVDTPR;ALALGASGIFIGR;FTLPPNLTLK;GVLTGEDAR;MAHPDGEYATAR;MDEANDSGLASYVAGQIDR;MEITNVTEYDAIAK;NFEGLDLGK;NHITTEWDTPR;NHITTEWDTPRPSAR;NVVEQLVR;QLDYVPATISALEEVVK
AT2G41840	AT2G41840.1	RIBOSOMAL PROTEIN US5X (US5X)	RIBOSOMAL PROTEIN US5X (US5X)	Ribosomal protein S5 family protein;(source:Araport11)		34.5026	34.3739	34.5616	31.8112	32.1628	31.8171	2.54902	3.72735	14	14	7	51.6	51.6	28.1	323.31	19121000000	31082000000	32156000000	565920000	793550000	726380000	5206300000	4923900000	5691300000	619670000	767800000	594710000	485	AFVVVGDGNGHVGLGVK;ALSTSKPDPVVEDQA;ASEEEKWVPVTK;ATFDCLQK;EYQIIDMLIGPTLK;EYQIIDMLIGPTLKDEVMK;KVLQFAGIDDVFTSSR;LSVVPVRR;LVAAGHIK;QIEQIYLHSLPVK;SPYQEHTDFLASK;TLGNFVK;TYGFLTPEFWK;VLQFAGIDDVFTSSR
AT3G14940	AT3G14940.2;AT3G14940.1	PHOSPHOENOLPYRUVATE CARBOXYLASE 3 (PPC3)	PHOSPHOENOLPYRUVATE CARBOXYLASE 3 (ATPPC3);PHOSPHOENOLPYRUVATE CARBOXYLASE 3 (PPC3)	Encodes a cytosolic phosphoenolpyruvate carboxylase (PEPC) that has activity when expressed in E.coli. Its mRNA is most abundantly expressed in roots and siliques. PPC3 belongs to the plant-type PEPC family. It can form an enzymatically active complex with a castor bean ortholog of PPC4, which encodes a bacterial-type PEPC. The mRNA is cell-to-cell mobile.		24.2138	23.7039	24.8607	24.1055	25.2798	22.3219	0.35711	0.438726	6	3	3	8	5	5	5.9278	15285000	19077000	38638000	0	0	0	12807000	8877200	11693000	0	0	0	2	HLDIGSSYR;HYIEFWK;LATPELEYGR;LLVSEDLWAFGEK;REPSKLEELGSVLTSLDPGDSIVISK;VTIDLIEMVFAK
AT3G14990	AT3G14990.3;AT3G14990.2;AT3G14990.1	DJ-1 HOMOLOG A (DJ1A)	DJ-1 HOMOLOG A (DJ1A);DJ-1 HOMOLOG A (AtDJ1A); (DJ-1A)	Encodes a homolog of animal DJ-1 superfamily protein. In the A. thaliana genome, three genes encoding close homologs of human DJ-1 were identified AT3G14990 (DJ1A), AT1G53280 (DJ1B) and AT4G34020 (DJ1C). Among the three homologs, DJ1C is essential for chloroplast development and viability. It exhibits glyoxalase activity towards glyoxal and methylglyoxal. The mRNA is cell-to-cell mobile.		26.1188	27.0994	26.2599	26.9623	26.933	26.5045	-0.307194	0.662382	5	5	5	17.9	17.9	17.9	68.795	57244000	200750000	101910000	19637000	21146000	18278000	25584000	44158000	32938000	62927000	72354000	27146000	24	ANVVIAAVGNSLEVEGSR;GGADVTVASVETQVGVDACHGIK;LVAEVLLDEVAEK;RGGADVTVASVETQVGVDACHGIK;VVVDGNVITSR
AT3G15000	AT3G15000.1	RNA-EDITING FACTOR INTERACTING PROTEIN 1 (RIP1)	RNA-EDITING FACTOR INTERACTING PROTEIN 1 (RIP1);MULTIPLE ORGANELLAR RNA EDITING FACTOR 8 (MORF8)	Encodes RIP1 (RNA-editing factor interacting protein 1). Involved in chloroplast and mitochondrial RNA editing. The mRNA is cell-to-cell mobile.		24.5562	24.1588	21.6816	20.7482	23.456	23.7116	0.826948	0.551829	3	3	3	7.8	7.8	7.8	4.3146	19379000	26148000	4265800	0	0	0	14007000	10455000	5219900	0	0	0	6	TLAQIVGSEDEAR;WVLPDSYLDVR;YHEEWIR
AT3G15190	AT3G15190.1	PLASTID RIBOSOMAL PROTEIN S20 (PRPS20)	PLASTID RIBOSOMAL PROTEIN S20 (PRPS20);RIBOSOMAL PROTEIN BS20C (BS20C)	chloroplast 30S ribosomal protein S20;(source:Araport11)		23.0798	22.272	22.1526	21.8968	23.8502	24.8115	-1.01805	0.746235	2	2	2	10.9	10.9	10.9	8.0522	6964500	7070700	5912500	0	0	0	21398000	10770000	10033000	0	0	0	2	TDAQADEIVTVEK;VLEALEGLK
AT3G15356	AT3G15356.1;AT3G16530.1	0	0	Legume lectin family protein;(source:Araport11)		22.6094	23.1535	22.8035	26.1291	24.5393	25.7577	-2.6199	1.94001	2	2	2	14.4	14.4	14.4	8.6543	5026800	13026000	9283700	11022000	4024100	10892000	10935000	14728000	12047000	22121000	14579000	20218000	5	FNFDSFDGSNLLFLGDAELGPSSDGVSR;NTITIAPENVK
AT3G15360	AT3G15360.1	THIOREDOXIN M-TYPE 4 (TRX-M4)	(ATHM4);ARABIDOPSIS THALIANA MYOSIN 4 (ATM4);THIOREDOXIN M-TYPE 4 (TRX-M4);ARABIDOPSIS THIOREDOXIN M-TYPE 4 (ATM4)	encodes a prokaryotic thioredoxin The mRNA is cell-to-cell mobile.		21.6439	22.4629	23.732	24.7456	23.5083	25.3598	-1.92496	1.40639	2	2	2	15.5	15.5	15.5	16.217	0	8071200	0	4224600	1969200	8266900	0	6679100	0	15892000	18483000	20884000	5	DSIIGAVPR;VLESDVPVLVEFWAPWCGPCR
AT3G15730	AT3G15730.1	PHOSPHOLIPASE D ALPHA 1 (PLDALPHA1)	(PLD);PHOSPHOLIPASE D ALPHA 1 (PLDALPHA1)	Encodes phospholipase D alpha 1 (PLD alpha 1). Positive regulator of abscisic acid (ABA) mediated stomatal movements. PLD alpha 1 plays an important role in seed deterioration and aging in Arabidopsis. The mRNA is cell-to-cell mobile.		28.5287	28.3956	28.3885	30.1674	30.24	29.7612	-1.61864	2.60607	18	18	16	35.1	35.1	31.9	283.69	304210000	492990000	445620000	181100000	209290000	174700000	68708000	90836000	87097000	259300000	246630000	134330000	118	AQGLEEDPR;AQHLLHGTLHATIYEVDALHGGGVR;AYIPVDQVINGEEVDQWVEILDNDRNPIQGGSK;DDNPIGATLIGR;DGEYEPAEKPDPDTDYMR;DGLMATHDEETENFFR;GETQLYATIDLQK;ILANVEETIGVGK;ISDKYWDFYSSESLEHDLPGHLLR;IVVVDSEMPSR;RPKPGGDVTIGELLK;SDYLPPILTT;SIDGGAAAGFPESPEAAAEAGLVSGK;VLLLVWDDR;VSLYQDAHIPDNFVPR;YDTPFHSLFR;YPIGVASEGDITELPGFEFFPDTK;YWDFYSSESLEHDLPGHLLR
AT3G15950	AT3G15950.1;AT3G15950.2;AT3G15950.4;AT3G15950.3;AT3G15950.5	(NAI2)	(NAI2)	Similar to TSK-associating protein 1 (TSA1), contains 10 EFE repeats, a novel repeat sequence unique to plants. Expressed preferentially in the roots.Protein is localized to ER bodies- an endoplasmic reticulum derived structure. Loss of function mutations lack ER bodies.		24.6178	26.2726	24.8538	29.1278	29.27	28.9648	-3.87277	2.11834	11	11	11	25.4	25.4	25.4	56.323	0	113180000	38452000	88096000	106840000	100590000	0	11702000	6749000	77328000	93946000	106240000	29	ADDLTGINDEEHAAK;AKDEQAAEEFAVETTK;DKDGLQADTDSSINIAEILAEESK;EAGSDGINKVEESKDDEEAAR;EASQAYEEYHEAVHK;EFEAAHAGFEQLK;EFEAVTESFK;GLEELKNESEQAENKR;QLEDIADNKAEGDDESAKR;QLNLDDFSEGDDSAESAR;VGSVLGSSSSVTSTTSESAATSESIESLK
AT3G15980	AT3G15980.1;AT3G15980.7;AT3G15980.6;AT3G15980.4;AT3G15980.3;AT3G15980.2	BETA PRIME2-COP (B?2-COP)	BETA PRIME2-COP (B?2-COP)	Part of Coat Protein Complexes (COPs).The presence of &#946;?1-COP and &#946;?2-COP is required for female and male gametophyte development.		22.6812	23.5097	23.1882	23.6673	24.5482	24.518	-1.11812	1.67067	5	1	1	8.7	1.4	1.4	2.3423	5283400	16674000	12121000	2000800	4048900	4612300	9347100	14357000	11899000	12563000	18228000	17035000	2	GVNCVDYFTGGDKPYLITGSDDHTAK;LENTLNYGLER;SFEVTELPVR;SFGSGLEFVWSSEGECAVR;SIGAGYEATDGER
AT3G16140	AT3G16140.1	PHOTOSYSTEM I SUBUNIT H-1 (PSAH-1)	PHOTOSYSTEM I SUBUNIT H-1 (PSAH-1)	Encodes subunit H of photosystem I reaction center subunit VI.		24.3964	23.5668	23.7053	25.2411	23.3225	23.3873	-0.0941665	0.346976	3	2	2	25.5	17.9	17.9	23.031	0	17347000	17346000	5956100	0	2106500	0	9982200	9932600	17078000	0	11472000	5	FFETFAAPFTK;FLILGGGSLLTYVSATSTGEVLPIK;FLILGGGSLLTYVSATSTGEVLPIKR
AT3G16400	AT3G16400.2;AT3G16400.1;AT3G16410.1	NITRILE SPECIFIER PROTEIN 1 (NSP1)	MYROSINASE-BINDING PROTEIN-LIKE PROTEIN-470 (ATMLP-470);NITRILE SPECIFIER PROTEIN 1 (NSP1);NITRILE SPECIFIER PROTEIN 1 (ATNSP1)	Encodes a nitrile-specifier protein NSP1 responsible for constitutive and herbivore-induced simple nitrile formation in rosette leaves. NSP1 is one out of five (At3g16400/NSP1, At2g33070/NSP2, At3g16390/NSP3, At3g16410/NSP4 and At5g48180/NSP5) A. thaliana epithiospecifier protein (ESP) homologues that promote simple nitrile, but not epithionitrile or thiocyanate formation. The mRNA is cell-to-cel…		27.2007	28.0068	27.5728	28.8997	28.8641	29.4009	-1.46147	2.34701	11	11	11	33.4	33.4	33.4	112.99	121170000	376540000	253170000	75213000	80639000	136090000	35465000	68902000	51081000	122690000	110590000	153550000	62	APTNDRFDDLFFYGIDSA;FEYVNGSQVVVGDEHGK;FGGEEETPSSR;GGAGLEVVQGK;GGEMGDVWDDGVYENVR;IYSFGGEFTPNQPIDK;LDKFGGEEETPSSR;LLTPVEEGPTPR;VWVVYGFNGCEVDDVHYYDPVQDK;WFHCSTPGDSLTAR;WTQVETFGVRPSER
AT3G16420	AT3G16420.3;AT3G16420.2;AT3G16420.1	PYK10-BINDING PROTEIN 1 (PBP1)	PYK10-BINDING PROTEIN 1 (PBP1);JACALIN-RELATED LECTIN 30 (JAL30); (PBPI)	The PBP1(PYK10-binding protein 1) assists the PYK10 (beta-glucosidase complex) in its activity and may act like a molecular chaperone that facilitates the correct polymerization of PYK10, when tissues are damaged and subcellular structures are destroyed by pests. The mRNA is cell-to-cell mobile.		29.0337	29.172	29.1042	30.005	30.3047	30.2354	-1.0784	2.91563	13	13	13	71.1	71.1	71.1	323.31	431710000	844420000	731850000	161820000	218880000	242680000	176620000	206030000	201240000	234390000	250360000	211830000	120	FVYDKSPEEVTGEEHGK;GANLWDDGSTHDAVTK;IIGFHGSAGGNLNSLGAYFAPLTTTTPLTPAK;KVYVGQAQDGISAVK;NGQPEQAPLR;QLTAFGSDDGTVWDDGAYVGVK;QTSPPFGLEAGTVFELK;QTSPPFGLEAGTVFELKEEGHK;SPEEVTGEEHGK;STLLGFEEFVLDYPSEYITAVDGTYDK;TSDVIGSDEGTHFTLQVK;VLPADPFVINHPDEHLVSVEGWYSPEGIIQGIK;VYVGQAQDGISAVK
AT3G16450	AT3G16450.3;AT3G16450.2;AT3G16450.1	JACALIN-RELATED LECTIN 33 (JAL33)	JACALIN-RELATED LECTIN 33 (JAL33)	Mannose-binding lectin superfamily protein;(source:Araport11)		23.6242	24.4056	24.1333	27.1424	27.2959	26.4058	-2.89364	3.13963	6	6	6	47	47	47	43.212	10157000	31027000	23337000	22248000	27194000	17069000	17159000	23829000	23750000	43076000	48699000	23916000	8	AGEALYALGAYFATTTTPVTPAK;GAENIVGGEHGKPTLLGFEEFEIDYPSEYITAVEGTYDK;LSAIGGDEGTAWDDGAYDGVKK;QTSAPFGLEAGTAFELKEEGHK;VEAGGGAGGASWDDGVHDGVR;VYVGQGQDGISAVK
AT3G16460	AT3G16460.2;AT3G16460.1	JACALIN-RELATED LECTIN 34 (JAL34)	JACALIN-RELATED LECTIN 34 (JAL34)	Mannose-binding protein		26.8723	27.1257	27.1148	26.623	26.4834	26.7777	0.409553	1.88585	4	4	4	10.4	10.4	10.4	94.549	96505000	204440000	184310000	15522000	15484000	22089000	60094000	75230000	70662000	56762000	59349000	55362000	28	IYASYGGEGIQYVK;LEAQGNSTGGTSWDDGSDYDGVTK;LEGAGSEAGTLWDDGAFDGVR;VYVGQGQDGVAAVK
AT3G16470	AT3G16470.1;AT3G16470.3;AT3G16470.4;AT3G16470.2	JASMONATE RESPONSIVE 1 (JR1)	JASMONATE RESPONSIVE 1 (JR1);JACALIN-RELATED LECTIN 35 (JAL35);JACALIN-LECTIN LIKE 1 (ATJAC1)	Encodes a JA-responsive gene that coordinates with GRP7 in shaping plant development through the regulation of RNA processing in Arabidopsis. AtJAC1 interacts with RNA binding protein GRP7 specifically in the cytoplasm to regulate its nucleocytoplasmic distribution.		27.0269	27.3179	27.283	27.1558	27.5271	27.3198	-0.124984	0.670129	8	8	8	42.1	42.1	42.1	55.069	107420000	233580000	207100000	22456000	31922000	32163000	47828000	53115000	50340000	42908000	53217000	45168000	32	GGDVWDDGGAYDNVK;IVGFHGSSSDLIHSVGVYIIPSTTPLTPPVSGGLTK;IVGFYGQAGEYLYK;QTLLGTEEFEIDPEDYITYVK;QTLLGTEEFVVDPEDYITSVK;TSIPYGLEGGTEFVLEK;TSQPFGLTSGEEAELGGGK;VYVGQGDSGVVYVK
AT5G23740	AT5G23740.1	RIBOSOMAL PROTEIN S11-BETA (RPS11-BETA)	RIBOSOMAL PROTEIN US17X (US17X);RIBOSOMAL PROTEIN S11-BETA (RPS11-BETA)	Encodes a putative ribosomal protein S11 (RPS11-beta).		30.2779	29.5018	30.3553	27.5327	27.5991	27.3693	2.54463	2.38931	9	6	6	39.6	24.5	24.5	32.427	1022699999.9999999	1061299999.9999999	1741999999.9999998	29161000	33555000	33285000	973760000	600580000	1032099999.9999999	149370000	148440000	117560000	27	CPFTGTVSIR;EAIDGAYIDSK;EGDHVIIGQCR;EGDHVIIGQCRPLSK;HSNIPAHVSPCFR;RHSNIPAHVSPCFR;VIPAGASAFGK;VKEGDHVIIGQCR;VKEGDHVIIGQCRPLSK
AT3G16640	AT3G16640.1	TRANSLATIONALLY CONTROLLED TUMOR PROTEIN (TCTP1)	TRANSLATIONALLY CONTROLLED TUMOR PROTEIN (TCTP1); (AtTCTP1)	Encodes a protein homologous to translationally controlled tumor protein (TCTP) from Drosophila. In flies, TCTP functions guanine nucleotide exchange factor in the TOR signaling pathway. TCTP is expressed throughout the plant with highest levels seen in meristematic regions of the shoot and root. Loss of function alleles are not transmitted through the male gametophyte due to defects in pollen tu…		26.5752	26.7635	26.789	27.42	27.198	27.8245	-0.77162	1.70676	6	6	6	44.6	44.6	44.6	43.912	78545000	159050000	147050000	26969000	25411000	45633000	75205000	85299000	88173000	69209000	38776000	67074000	30	EIENGILWEVEGK;LQEQPTYDKK;LSEEDQAVFK;LSEEDQAVFKK;VVDIVDTFR;WVTVGAVDVNIGANPSAEEGGEDEGVDDSTQK
AT5G62390	AT5G62390.1	BCL-2-ASSOCIATED ATHANOGENE 7 (BAG7)	BCL-2-ASSOCIATED ATHANOGENE 7 (ATBAG7);BCL-2-ASSOCIATED ATHANOGENE 7 (BAG7)	A member of Arabidopsis BAG (Bcl-2-associated athanogene) proteins, plant homologs of mammalian regulators of apoptosis. Plant BAG proteins are multi-functional and remarkably similar to their animal counterparts, as they regulate apoptotic-like processes ranging from pathogen attack, to abiotic stress, to plant development. Localized to the ER. Necessary for the proper maintenance of the unfolde…		30.7621	30.2664	30.3869	27.7944	28.301	27.7018	2.53937	3.55154	12	12	11	23.8	23.8	21.7	266.71	1430500000	1803099999.9999998	1780499999.9999998	34961000	54582000	41912000	574140000	428690000	367550000	78835000	84657000	53381000	83	AIAAAEAEK;EIAEGVTQIVQMLETEEE;KYKLEAEIEGSGER;LEAEIEGSGER;RLEPEYPLK;RRLEPEYPLK;SYNWTTEVK;TFDMPDSLIR;VVVIEEEEEEDDESSEHGAIVLR;WEAEIQGPLER;YKLEAEIEGSGER;YKWEAEIQGPLER
AT1G29965	AT1G29965.1;AT1G29970.2	(RPL18AD)	(RPL18AD);RIBOSOMAL PROTEIN EL20W (EL20W)	cytosolic ribosomal protein gene, part of eL20 family		24.732	24.7828	24.8073	22.2502	21.9448	22.5165	2.53688	2.73358	6	3	2	32.6	19.7	11.8	6.119	21891000	40298000	37234000	0	0	0	22984000	13721000	25442000	0	0	0	6	ALPTEKDEQPK;ANKPNLFM;FPCIQIIK;LWATNEVLAK;NFGIWLR;SNGQMLAINEIFEK
AT3G17390	AT3G17390.1	METHIONINE OVER-ACCUMULATOR 3 (MTO3)	METHIONINE OVER-ACCUMULATOR 3 (MTO3);S-ADENOSYLMETHIONINE SYNTHETASE 3 (SAMS3);METHIONINE ADENOSYLTRANSFERASE 4 (MAT4); (ATSAMS3)	S-adenosylmethionine synthetase		30.4009	30.5308	30.4779	29.7325	29.9676	29.7117	0.665932	2.49254	17	17	9	58.3	58.3	36.9	323.31	1113700000	2165700000	1896499999.9999998	133970000	173280000	168800000	252670000	339990000	301540000	214400000	352220000	205360000	185	ANVDYEQIVR;DDADFTWEVVKPLK;EHVIKPVIPEK;EIGFVSADVGLDADNCK;FVIGGPHGDAGLTGR;IIIDTYGGWGAHGGGAFSGK;IIIDTYGGWGAHGGGAFSGKDPTK;IPDKEILEIVK;KIIIDTYGGWGAHGGGAFSGK;KIIIDTYGGWGAHGGGAFSGKDPTK;MESFLFTSESVNEGHPDKLCDQISDAILDACLEQDPESK;RVIVQVSYAIGVPEPLSVFVDSYGTGK;SIVASGLAR;TAAYGHFGR;TQVTIEYINESGAMVPVR;VHTVLISTQHDETVTNDEIAADLK;VIVQVSYAIGVPEPLSVFVDSYGTGK
AT3G18000	AT3G18000.1	XIPOTL 1 (XPL1)	XIPOTL 1 (XPL1);N-METHYLTRANSFERASE 1 (NMT1); (PEAMT1); (DPR2);PHOSPHOETHANOLAMINE METHYLTRANSFERASE1 (ATPMT1); (PEAMT)	Encodes a N-methyltransferase-like protein. Double mutants of NMT1 and NMT3 are defective in leaf, root, flower, seed, and pollen development.		23.4037	22.5097	22.67	22.4381	23.7259	23.4101	-0.330269	0.577357	4	1	1	11.2	4.5	4.5	2.1566	8717300	8336900	8463300	0	0	0	10140000	7701200	7905200	0	0	0	1	ASDLDKEERPEVLSLLPPYEGK;DTILHIQDKPALFR;FLDNVQYK;SVLELGAGIGR
AT3G18060	AT3G18060.1	0	0	transducin family protein / WD-40 repeat family protein;(source:Araport11)		24.1642	17.0304	23.2222	23.0743	21.3965	21.3389	-0.464277	0.367891	2	2	2	6.6	6.6	6.6	8.8851	0	0	0	1326400	0	0	0	0	0	9617500	0	0	1	GAHLGGVYGLGFADDSHVVSSGEDACIR;SVVTLDLNNPLK
AT1G67680	AT1G67680.1;AT1G67650.1	0	0	SRP72 RNA-binding domain-containing protein;(source:Araport11)		25.873	25.0836	25.7932	22.8188	21.6666	24.6556	2.5363	1.34434	4	4	4	10.1	10.1	10.1	15.578	48277000	49642000	73744000	0	0	0	26344000	15121000	24385000	0	0	0	10	GFDPANPGPPPDPER;SQIETLEVNLVAGLISAGK;VADQVLSIVPTDEDAIR;VVALIKDDKFDDYLIK
AT3G18190	AT3G18190.1	CHAPERONIN CONTAINING T-COMPLEX POLYPEPTIDE-1 SUBUNIT 4 (CCT4)	CHAPERONIN CONTAINING T-COMPLEX POLYPEPTIDE-1 SUBUNIT 4 (CCT4)	TCP-1/cpn60 chaperonin family protein;(source:Araport11)		24.1891	24.5903	24.5144	25.161	25.5473	25.3869	-0.933793	2.5946	2	2	2	5.8	5.8	5.8	25.841	15025000	35264000	30392000	5634300	8092600	8423300	8835200	14981000	12645000	37650000	45287000	38421000	8	FLIAGGGAPEIELSR;LGHADLVEEASLGDGK
AT3G18420	AT3G18420.1	SLOW GREEN 1 (SG1)	SLOW GREEN 1 (SG1)	Protein prenylyltransferase superfamily protein;(source:Araport11)		25.3052	22.572	23.525	25.9711	23.5425	21.2824	0.202058	0.344219	2	2	2	10.8	10.8	10.8	11	32570000	8705100	15308000	0	0	0	20308000	11858000	23352000	0	0	0	6	LSEITPLSELLDSTPEAVETLR;LVAAQPEETEWK
AT5G22060	AT5G22060.1	DNAJ HOMOLOGUE 2 (J2)	DNAJ HOMOLOGUE 2 (J2);ARABIDOPSIS THALIANA DNAJ HOMOLOGUE 2 (ATJ2)	Co-chaperonin similar to E. coli DnaJ		25.1081	25.5483	25.2017	21.4625	24.8511	21.9391	2.53514	1.16459	8	2	2	21.7	5.5	5.5	4.847	28409000	68507000	48939000	0	4994800	0	27126000	35031000	26829000	0	48958000	0	10	AIEAVLPKPTK;AISDEGMPIYQR;EIYDQYGEDALK;ELAQAYEVLSDPEKR;GTGETINDRDR;RGEDVVHPLK;VLEVNVEK;VSLEDVYLGTTK
AT3G18780	AT3G18780.3;AT3G18780.2;AT3G18780.1;AT1G49240.1	ACTIN 2 (ACT2)	ACTIN 2 (ACT2);DEFORMED ROOT HAIRS 1 (DER1);LIGHT STRESS-REGULATED 2 (LSR2);ENHANCER OF LRX1 2 (ENL2)	Encodes an actin that is constitutively expressed in vegetative structures but not pollen. ACT2 is involved in tip growth of root hairs.		31.2481	30.9126	30.9796	31.2219	31.2925	31.4941	-0.289401	1.32289	14	14	9	53.3	53.3	38.5	323.31	2003499999.9999998	2822000000	2685200000	376140000	434100000	580690000	664620000	561480000	616560000	374370000	499790000	349080000	218	AEADDIQPIVCDNGTGMVK;AEYDEAGPGIVHR;AGFAGDDAPR;DAYVGDEAQSK;DLTDYLMK;DLYGNIVLSGGTTMFSGIADR;HHGVMVGMNQK;IAPEEHPVLLTEAPLNPK;IWHHTFYNELR;KDLYGNIVLSGGTTMFSGIADR;LSFVAVDYEQEMETSK;NYELPDGQVITIGAER;TTGIVLDSGDGVSHTVPIYEGFSLPHAILR;YPIEHGVVSNWDDMEK
AT5G61970	AT5G61970.1	0	0	signal recognition particle-related / SRP-like protein;(source:Araport11)		26.1477	25.3531	26.0406	23.6076	23.2581	23.0877	2.52935	2.96543	5	5	5	10.7	10.7	10.7	16.969	58400000	59836000	87536000	1919600	0	0	25460000	13559000	21496000	8564200	0	0	19	AILESTVTDVR;AVGAVLGQR;ELQSPTAESLPAEK;LYDLLLQNVADLSDLISSGR;YGDLENQVLCR
AT1G33140	AT1G33140.1;AT1G33120.1	PIGGYBACK2 (PGY2)	RIBOSOMAL PROTEIN UL6Y (UL6Y);PIGGYBACK2 (PGY2)	Encodes ribosomal protein L9. Identified in a screen for enhancers of as1. as1/pgy double mutants show defects in leaf vascular patterning and adaxial cell fate. Double mutant analysis indicates pgy genes function in the same pathway as REV, KAN1 and KAN2. The mRNA is cell-to-cell mobile.		33.2452	33.3321	33.4732	30.4303	31.3039	30.7905	2.50862	2.45814	14	14	9	68	68	54.1	323.31	7998099999.999999	15097000000	15123000000	217300000	437540000	356560000	1822899999.9999998	2037599999.9999998	2161900000	225850000	347540000	313430000	431	FLDGIYVSEK;FVYAHFPINASIGGDGK;HLNLDFQLIK;HLNLDFQLIKDPETGK;HLNLDFQLIKDPETGKK;IDSWFGTR;KFLDGIYVSEK;KVEMLDGVTIVR;LKIDSWFGTR;SCALINQK;TALSHVDNLISGVTR;TILSSETMDIPDSVTIK;VIEVEGPR;VKDEIVLDGNDIELVSR
AT3G19820	AT3G19820.3;AT3G19820.2;AT3G19820.1	DWARF 1 (DWF1)	DWARF 1 (DWF1);DIMINUTIA (DIM);ENHANCED VERY-LOW-FLUENCE RESPONSES 1 (EVE1);DIMINUTO 1 (DIM1);CABBAGE 1 (CBB1)	Involved in the conversion of the early brassinosteroid precursor 24-methylenecholesterol to campesterol. Brassinosteroids affect cellular elongation. Mutants have dwarf phenotype. DWF1 is a Ca2+-dependent calmodulin-binding protein.		27.0648	26.6982	26.7889	26.5378	26.2108	26.6967	0.368861	1.23967	7	7	7	15.9	15.9	15.9	60.697	110280000	152010000	147040000	14632000	12818000	20882000	51646000	47392000	48298000	38398000	34410000	45545000	28	EAEQAHLETAYAEAD;GDLQALAQGYIDSFAPK;GEEFDGSEAVR;GQFVEYIPTR;GQIYPEPGFEYENR;HFEVDLGEFR;LILPFGDQFWFR
AT3G20050	AT3G20050.1	T-COMPLEX PROTEIN 1 ALPHA SUBUNIT (TCP-1)	T-COMPLEX PROTEIN 1 ALPHA SUBUNIT (ATTCP-1);T-COMPLEX PROTEIN 1 ALPHA SUBUNIT (TCP-1);CHAPERONIN CONTAINING T-COMPLEX POLYPEPTIDE-1 SUBUNIT 1 (CCT1)	Encodes a putative cytoplasmic chaperonin that is similar to mouse Tcp-1 (t complex polypeptide 1).		25.3229	25.4174	25.1479	25.7255	26.2911	25.9798	-0.702709	1.78568	4	4	4	8.8	8.8	8.8	9.9083	32972000	62564000	47148000	8332400	13552000	12705000	21794000	23176000	18061000	31354000	35408000	31386000	14	EQLAIAEFADALLIIPK;IACLDFNLQK;IADDDVILIK;YFVEAGAIAVR
ATCG01280	ATCG01280.1;ATCG00860.1	(YCF2.2)	(YCF2.2)	Chloroplast Ycf2;(source:Araport11)		25.5267	24.6037	25.2197	23.1736	22.8313	21.8596	2.49522	2.35344	3	3	3	1.9	1.9	1.9	7.783	37974000	35595000	49555000	0	0	0	24258000	12627000	21377000	0	0	0	5	AYSELQTEFEK;GLLTSQTDPPTSIYK;SLLVLPPIFYEENESFYR
AT3G22200	AT3G22200.1;AT3G22200.2	POLLEN-PISTIL INCOMPATIBILITY 2 (POP2)	POLLEN-PISTIL INCOMPATIBILITY 2 (POP2)	Genetically redundant with POP3;mediates pollen tube guidance. Double mutants are self sterile; gamma-aminobutyrate transaminase subunit precursor; nuclear gene for mitochondrial product. Encodes gamma-aminobutyrate transaminase that uses pyruvate instead of alpha-ketoglutarate as cosubstrate. Mutations in POP2/HER1 render roots resistant to the inhibitory growth effects of the volatile organic c…		25.2669	25.0468	24.0644	24.6125	25.6869	25.6691	-0.530122	0.745224	4	4	4	13.7	13.7	13.7	11.788	31715000	48390000	22248000	3852400	8914700	10243000	17283000	24401000	14019000	23661000	33449000	31930000	5	AFFTSGGSDANDTQVK;FHLPGETEEEFSTR;GTGLILGTEFVDNK;LGVFSHGFTYSGHPVSCAVAIEALK
AT3G22890	AT3G22890.1	ATP SULFURYLASE 1 (APS1)	ATP SULFURYLASE 1 (APS1); (ATPS1)	encodes ATP sulfurylase, the first enzyme in the sulfate assimilation pathway of Arabidopsis. It may also participate in selenium metabolism. The mRNA is cell-to-cell mobile.		21.6538	23.0872	21.4362	23.8718	24.1341	24.7942	-2.20762	1.79616	2	2	2	6.7	6.7	6.7	7.1325	2592000	12441000	3598500	2305400	3038600	5585700	3206800	11482000	2843800	14515000	16522000	24086000	7	LVELIVEEPK;VALFNSDGNPVAILSDIEIYK
AT3G22960	AT3G22960.1	(PKP-ALPHA)	PLASTIDIAL PYRUVATE KINASE 1 (PKP1); (PKP-ALPHA)	encodes a chloroplast pyruvate kinase alpha subunit. Important for seed oil biosynthesis. Ubiquitously expressed, with significantly increased expression in maturing seeds. The mRNA is cell-to-cell mobile.		21.0312	20.9977	22.0109	24.8862	25.7845	25.4298	-4.02022	3.355	3	3	3	8.2	8.2	8.2	10.701	0	0	0	4657200	9538800	8677700	0	0	0	24210000	21023000	25992000	5	AEVADVSEAVR;ALNKPVIVASQLLESMIEYPTPTR;TISVSYDGFAEDVR
AT4G14360	AT4G14360.2;AT4G14360.1;AT3G23300.2;AT3G23300.1	0	0	S-adenosyl-L-methionine-dependent methyltransferases superfamily protein;(source:Araport11)		24.7376	24.9114	24.7174	27.9217	27.9666	27.6842	-3.06871	4.9429	3	3	1	6.7	6.7	3.9	21.478	21975000	44056000	34983000	38186000	43288000	41404000	23101000	24003000	21864000	95813000	102520000	150350000	13	GSGLAPWPAR;RLPYPSR;VLRPGGYFAYSSPEAYAQDEEDLR
AT3G23390	AT3G23390.1;AT4G14320.1	RPL36A A (RPL36AA)	RPL36A A (RPL36AA);RIBOSOMAL PROTEIN EL42Z (EL42Z)	Zinc-binding ribosomal protein family protein;(source:Araport11)		26.4843	25.9444	26.1462	23.5534	26.9532	26.6482	0.473381	0.451775	3	3	3	16.2	16.2	16.2	5.7224	73749000	90147000	94187000	1848900	21444000	20192000	161910000	99928000	126290000	11694000	23850000	13856000	9	HFEIGGDK;HFEIGGDKK;HFSQRPIK
AT3G23400	AT3G23400.3;AT3G23400.2;AT3G23400.4;AT3G23400.1	FIBRILLIN 4 (FIB4)	FIBRILLIN 4 (FIB4);FIBRILLIN4 (FBN4)	Encodes FIBRILLIN 4 (FIB4). The fibrillins are a large family of chloroplast proteins that have been linked with stress tolerance and disease resistance. FIBRILLIN 4 is required for plastoglobule development and stress resistance.Iinvolved in plastoquinone transport.		22.9868	24.4738	22.5855	26.0986	26.3676	26.4754	-2.96518	1.80156	3	3	3	21.2	21.2	21.2	9.4394	6529800	32530000	7981500	10792000	14290000	17913000	18980000	22351000	16604000	28621000	30410000	26030000	2	ELETAGGPVDLTDDLDKLQGK;GLVASVDDLER;SLGGSRPGLPTGR
AT2G44120	AT2G44120.1;AT2G44120.2	RIBOSOMAL PROTEIN UL30X (UL30X)	RIBOSOMAL PROTEIN UL30X (UL30X)	Ribosomal protein L30/L7 family protein;(source:Araport11)		31.4534	31.2474	31.6001	28.9197	29.0218	28.902	2.48581	3.56565	16	7	4	52.9	28.9	14.5	263.28	2309900000	3559099999.9999995	4128299999.9999995	76264000	89958000	96303000	1296700000	1158900000	1382100000	208740000	229610000	211980000	112	EANNFLWPFQLK;ENFINELVR;EYAEKDNELIR;GGFYVDPEAK;GINAIDPK;IALTDNSIVDQALGK;KILQLLR;LKGGFYVDPEAK;NHYVEGGDAGNR;NHYVEGGDAGNRENFINELVR;QEEWALAK;QIFNGVFLK;RNHYVEGGDAGNR;RQEEWALAK;RVEPYVTYGYPNLK;VVVPESVLK
AT3G23600	AT3G23600.1;AT3G23600.2	0	0	alpha/beta-Hydrolases superfamily protein;(source:Araport11)		24.5146	25.048	24.2912	24.1197	24.7644	24.9729	-0.00108443	0.302066	4	4	4	39.3	39.3	39.3	79.852	18828000	48430000	26035000	2737700	4703500	6322000	12894000	16492000	12638000	11324000	15260000	18917000	12	LCVLLISDIFGFEAPNLR;LGGLDAYVSGSAESK;VAASGFYVVVPDYFGGDPYNPSNQDRPIPVWIK;VVVELSKEELIQAAVLLHPSFVNVDDIK
AT3G23810	AT3G23810.1	S-ADENOSYL-L-HOMOCYSTEINE (SAH) HYDROLASE 2 (SAHH2)	S-ADENOSYL-L-HOMOCYSTEINE (SAH) HYDROLASE 2 (SAHH2);S-ADENOSYL-L-HOMOCYSTEINE (SAH) HYDROLASE 2 (ATSAHH2)	S-adenosyl-l-homocysteine (SAH) hydrolase 2;(source:Araport11)		21.4319	22.4295	22.0594	23.2716	20.7525	22.0621	-0.055147	0.32381	13	1	1	40.4	5.6	5.6	6.6755	0	7886200	0	0	0	0	0	6907500	0	0	0	0	2	ALDWGPGGGPDLIVDDGGDATLLIHEGVK;DMSQADFGR;DSAAVFAWK;FDNLYGCR;KVYVLPK;LEIELAEVEMPGLVSCVTEFGPSQPLK;LMNLGCATGHPSFVMSCSFTNQVIAQLELWNEK;LVGVSEETTTGVK;LVGVSEETTTGVKR;NNAIVCNIGHFDNEIDMLGLETYPGVK;SKFDNLYGCR;VAVICGYGDVGK;WCSCNIFSTQDHAAAAIAR
AT3G23990	AT3G23990.1	HEAT SHOCK PROTEIN 60 (HSP60)	HEAT SHOCK PROTEIN 60 (HSP60);HEAT SHOCK PROTEIN 60-3B (HSP60-3B)	mitochondrial chaperonin HSP. assist in rapid assembly of the oligomeric protein structures in the mitochondria.		25.7751	25.9539	25.9677	26.2594	25.078	26.6182	-0.0862958	0.361229	6	6	1	14.2	14.2	2.1	48.323	45108000	90744000	83224000	12064000	5845600	19776000	28895000	26937000	30920000	43753000	37375000	43402000	17	EGVITIQDGK;GVEDLADAVK;LLEQDNPDLGYDAAK;NVVIEQSWGAPK;QVANATNDVAGDGTTCATVLTR;TLFNELEVVEGMK
AT3G24500	AT3G24500.1	MULTIPROTEIN BRIDGING FACTOR 1C (MBF1C)	(ATMBF1C);MULTIPROTEIN BRIDGING FACTOR 1C (MBF1C)	One of three genes in A. thaliana encoding multiprotein bridging factor 1, a highly conserved transcriptional coactivator. May serve as a bridging factor between a bZIP factor and TBP. Its expression is specifically elevated in response to pathogen infection, salinity, drought, heat, hydrogen peroxide, and application of abscisic acid or salicylic acid. Constitutive expression enhances the tolera…		24.8898	24.6823	24.7582	27.0406	26.4099	27.5928	-2.23766	2.00229	3	3	3	23	23	23	11.526	24420000	37586000	35988000	20733000	14715000	38862000	26515000	30776000	19606000	74808000	38327000	97947000	6	AVPNQAVLAK;KLEEETEPAAMDR;TQVVQEYENGK
AT3G24503	AT3G24503.1	ALDEHYDE DEHYDROGENASE 2C4 (ALDH2C4)	ALDEHYDE DEHYDROGENASE 2C4 (ALDH2C4);REDUCED EPIDERMAL FLUORESCENCE1 (REF1);ALDEHYDE DEHYDROGENASE 1A (ALDH1A)	Arabidopsis thaliana aldehyde dehydrogenase AtALDH1a mRNA. a sinapaldehyde dehydrogenase catalyzes both the oxidation of coniferylaldehyde and sinapaldehyde forming ferulic acid and sinapic acid, respectively		24.5617	24.39	24.4769	23.8773	23.4667	24.6358	0.482959	0.834349	2	2	2	4.8	4.8	4.8	7.5351	19453000	30694000	29613000	0	1913300	5004700	13193000	14708000	14795000	0	11431000	23751000	10	FADLIEENIEELAK;VFVQEGIYDK
AT3G16080	AT3G16080.1;AT1G52300.1;AT1G15250.2;AT1G15250.1;AT3G16080.2	RIBOSOMAL PROTEIN EL37X (EL37X)	RIBOSOMAL PROTEIN EL37X (EL37X)	Zinc-binding ribosomal protein family protein;(source:Araport11)		29.7609	28.4297	29.4351	26.4745	26.8967	26.8028	2.48389	2.05686	3	3	3	25.3	25.3	25.3	27.237	714680000	504800000	920500000	14004000	20621000	22476000	941720000	345090000	684140000	78553000	82659000	86351000	23	CSACAYPAAR;SHTLCVR;TYNWSVK
AT3G25140	AT3G25140.1	QUASIMODO 1 (QUA1)	GALACTURONOSYLTRANSFERASE 8 (GAUT8);QUASIMODO 1 (QUA1)	Quasimodo1, encodes a glycosyltransferase, involved in homogalacturonan biosynthesis; mutant shows cell adhesion defect and lower wall uronic acid content. The mRNA is cell-to-cell mobile.		23.358	23.6548	23.5973	27.3212	27.4355	26.9514	-3.69935	4.27893	2	2	1	5	5	2.9	12.429	8445700	18439000	16095000	25185000	29958000	24915000	8709400	9410100	9009000	106010000	122830000	51443000	7	ALYDSDGASIEESVLR;ILFLDDDVVVQK
ATCG00810	ATCG00810.1	RIBOSOMAL PROTEIN L22 (RPL22)	RIBOSOMAL PROTEIN L22 (RPL22);RIBOSOMAL PROTEIN UL22C (UL22C)	encodes a chloroplast ribosomal protein L22, a constituent of the large subunit of the ribosomal complex		30.6155	29.6946	29.9735	27.4897	27.5469	27.8552	2.46393	2.56164	4	4	4	21.9	21.9	21.9	20.472	1292300000	1213100000	1336900000	28304000	32363000	46614000	769030000	421500000	480920000	91573000	91147000	104290000	29	ETNLVISK;GCYPIFK;LVYSAAANASHNK;RVIDQIR
AT3G25230	AT3G25230.1;AT3G25230.2	ROTAMASE FKBP 1 (ROF1)	ROTAMASE FKBP 1 (ROF1); (ATFKBP62);FK506 BINDING PROTEIN 62 (FKBP62)	Encodes a a high molecular weight member of the FK506 binding protein (FKBP) family. It has three FKBP12-like domains, tetratricopeptide repeats, and a putative calmodulin binding domain. Modulates thermotolerance by interacting with HSP90.1 and affecting the accumulation of HsfA2-regulated sHSPs. Belongs to one of the 36 carboxylate clamp (CC)-tetratricopeptide repeat (TPR) proteins (Prasad 2010…		23.751	24.7246	22.7251	24.9653	25.0667	24.6464	-1.15924	1.05167	4	3	3	12.9	11.3	11.3	5.899	11090000	38705000	8792700	4919500	5799900	5041800	17297000	22809000	20874000	23370000	23581000	19580000	5	FIEYDTSFSEEEKK;KGENAVFTIPAELAYGESGSPPTIPANATLQFDVELLK;SDGVEFTVK;VLELESTNVK
AT3G16780	AT3G16780.1	RIBSOMAL PROTEIN LIKE 19B (RPL19B)	RIBSOMAL PROTEIN LIKE 19B (RPL19B);RIBOSOMAL PROTEIN EL19Z (EL19Z)	Ribosomal protein L19e family protein;(source:Araport11)		29.6243	28.9529	29.5761	26.5107	27.2661	27.0715	2.43496	3.12885	6	5	5	29.2	25.4	25.4	97.979	650090000	725460000	1014999999.9999999	14360000	26639000	27077000	385870000	244120000	403780000	20272000	54559000	43257000	50	EKTLADQFEAK;LAQGPGGGETTTPAGAPQQPEVTK;LAQGPGGGETTTPAGAPQQPEVTKK;TLADQFEAK;VLMESIHK;VWLDPNESGDISMANSR
AT3G25860	AT3G25860.1	(LTA2)	PLASTID E2 SUBUNIT OF PYRUVATE DECARBOXYLASE (PLE2); (LTA2)	Encodes the dihydrolipoamide S-acetyltransferase subunit of the plastid Pyruvate Dehydrogenase Complex (E2). Mutant has embryo defect.		24.8088	25.9032	25.8327	25.6436	26.191	24.385	0.10835	0.358939	3	3	3	9.6	9.6	9.6	20.252	23087000	87612000	75789000	7872800	12644000	4206100	21853000	24812000	23568000	36726000	50238000	18627000	11	ITASDVETAAGIAPSK;VDIESVAGTGPFGR;VGYPVNTDALDALYEK
AT5G16070	AT5G16070.1;AT3G02530.1	CHAPERONIN CONTAINING T-COMPLEX POLYPEPTIDE-1 SUBUNIT 6-1 (CCT6-1)	CHAPERONIN CONTAINING T-COMPLEX POLYPEPTIDE-1 SUBUNIT 6-1 (CCT6-1)	TCP-1/cpn60 chaperonin family protein;(source:Araport11)		24.4228	24.3726	23.8515	20.5436	24.894	20.0155	2.39795	0.886015	3	3	3	5.6	5.6	5.6	4.0245	17667000	30325000	19196000	0	0	0	18227000	18362000	17522000	0	0	0	4	GIDPPSLDLLAR;VLVDGFEIAK;YTFVEQVK
AT3G26060	AT3G26060.3;AT3G26060.1;AT3G26060.2	PEROXIREDOXIN Q (PRXQ)	PEROXIREDOXIN Q (PRXQ); (ATPRX Q)	encodes periredoxin Q which decomposes peroxides and plays a role in the protection of the photosynthetic apparatus		25.1541	26.4197	25.828	27.3206	26.4628	28.5575	-1.64638	1.32078	5	5	5	44.8	44.8	44.8	38.232	29330000	125330000	75543000	25174000	15265000	75849000	17316000	43543000	19652000	68397000	67725000	103870000	25	AGAEVIGISGDDSASHK;GKPVVLYFYPADETPGCTK;KAGAEVIGISGDDSASHK;KDWGVPGDLFGALPGR;NGVVQLIYNNQFQPEK
AT4G23940	AT4G23940.1	FTSH INACTIVE PROTEASE 1 (FTSHI1)	ACCUMULATION AND REPLICATION OF CHLOROPLASTS 1 (ARC1);FTSH INACTIVE PROTEASE 1 (FTSHI1)	Encodes FtsHi1. Localizes to the chloroplast envelope membrane. Functions in chloroplast biogenesis and division.Strong interaction with TIC inner envelope protein translocon which consists of Tic20/Tic56/Tic100/Tic214(Ycf1)(DOI:10.1105/tpc.18.00357).		25.8819	24.7167	24.6124	23.8299	21.1353	23.0557	2.39672	1.41617	4	4	4	6.9	6.9	6.9	11.712	48576000	38495000	32529000	2239500	0	0	24488000	16307000	19686000	10051000	0	0	12	ASVDYLSDASWLAR;GTNAATGAFEFIK;LYVPEQVFGPELSEEEEFEK;VNKPSVIFIDEIDALATR
AT3G26520	AT3G26520.1	TONOPLAST INTRINSIC PROTEIN 2 (TIP2)	TONOPLAST INTRINSIC PROTEIN 2 (TIP2);SALT-STRESS INDUCIBLE TONOPLAST INTRINSIC PROTEIN (SITIP); (GAMMA-TIP2); (TIP1;2)	gamma tonoplast intrinsic protein 2 (TIP2). expressed throughout the plant and transcript level is increased upon NaCl or ABA treatments. NaCl stress-sensitive yeast mutant strains exhibit more resistance to salt when expressing this protein.		23.3463	22.655	22.6319	20.8719	25.4192	19.5075	0.944901	0.487527	3	3	3	17	17	17	8.7325	0	9220400	8242900	0	7405200	0	0	6835600	6584700	0	61408000	0	3	AALAEFISTLIFVFAGSGSGIAFNK;NIAIGGVQEEVYHPNALR;NIAIGGVQEEVYHPNALRAALAEFISTLIFVFAGSGSGIAFNK
AT3G26650	AT3G26650.1	GLYCERALDEHYDE 3-PHOSPHATE DEHYDROGENASE A SUBUNIT (GAPA)	GLYCERALDEHYDE 3-PHOSPHATE DEHYDROGENASE A SUBUNIT (GAPA);GLYCERALDEHYDE 3-PHOSPHATE DEHYDROGENASE A SUBUNIT 1 (GAPA-1); (GAPA1)	Encodes one of the two subunits forming the photosynthetic glyceraldehyde-3-phosphate dehydrogenase (GAPDH) and as such a constituent of the supramolecular complex with phosphoribulokinase (PRK) thought to be linked by a small peptide encoded by CP12-2. GapA-1 is coordinately expressed by light with PRK and CP12-2. The enzyme activity, tested in leaf protein extracts dropped significantly after e…		30.5866	31.1207	30.6134	31.412	31.6812	31.4015	-0.724642	1.77069	19	16	8	59.8	50.3	29.5	323.31	1266700000	3259699999.9999995	2083299999.9999998	429120000	568310000	544580000	426400000	675380000	443400000	851290000	944360000	706050000	195	AAALNIVPTSTGAAK;AVALVLPNLK;DSPLDIIAINDTGGVK;ELGIDIVIEGTGVFVDREGAGK;GDIPTYVVGVNADAYSHDEPIISNASCTTNCLAPFVK;GILDVCDEPLVSVDFR;GKLNGIALR;GTMTTTHSYTGDQR;IIQVVSNR;IIQVVSNRNPSLLPWK;KDSPLDIIAINDTGGVK;KTFAEEVNAAFR;NPSLLPWK;TFAEEVNAAFR;VIAWYDNEWGYSQR;VPTPNVSVVDLVVQVSK;VPTPNVSVVDLVVQVSKK;VVDLADIVANNWK;YDSTLGIFDADVKPSGETAISVDGK
AT3G09440	AT3G09440.4;AT3G09440.3;AT3G09440.2;AT3G09440.1	HEAT SHOCK PROTEIN 70-3 (HSP70-3)	HEAT SHOCK PROTEIN 70-3 (HSP70-3)	Heat shock protein 70 isoform.		29.9032	30.215	29.781	27.7734	27.828	27.1104	2.39577	2.9295	33	16	12	59.5	27.1	20.5	307.42	788750000	1739999999.9999998	1169900000	34455000	39325000	27818000	247020000	369790000	249400000	81625000	96755000	34935000	122	AGKGEGPAIGIDLGTTYSCVGVWQHDR;AGKGEGPAIGIDLGTTYSCVGVWQHDRVEIIANDQGNR;ARFEELNIDLFR;ATAGDTHLGGEDFDNR;EIAEAYLGTTIK;ELESICNPIIAK;EQVFSTYSDNQPGVLIQVYEGER;FEELNIDLFR;FTDSSVQSDIK;GEGPAIGIDLGTTYSCVGVWQHDR;GEGPAIGIDLGTTYSCVGVWQHDRVEIIANDQGNR;GVPQITVCFDIDANGILNVSAEDKTTGQK;IEDSIEAAIEWLEANQLAECDEFEDK;IINEPTAAAIAYGLDK;IINEPTAAAIAYGLDKK;ITITNDK;ITITNDKGR;KIEDSIEAAIEWLEANQLAECDEFEDK;KIEDSIEAAIEWLEANQLAECDEFEDKMK;…
AT3G28710	AT3G28710.1;AT3G28715.1;AT3G28715.2	(VHA-D1)	(VHA-D1)	Vacuolar-type H + -ATPase (V-ATPase) is a multisubunit proton pump located on the endomembranes, which plays an important role in plant growth. VHA-d1 is one of the two subunit isoforms.		24.3961	20.1561	23.7967	22.3955	21.813	22.4456	0.564937	0.448104	4	4	4	23.6	23.6	23.6	24.479	17344000	1631200	18480000	0	0	0	9162800	2152400	9965700	0	0	0	10	AGLLTTADYNNLCQCENLDDIK;AVNITINSIGTELTR;LGGATAEIMSDLLAFEADRR;LYSNFGLLYPYGHEELAICEDIDQVR
AT3G29030	AT3G29030.1	EXPANSIN A5 (EXPA5)	ARABIDOPSIS THALIANA EXPANSIN A5 (ATEXPA5);ARABIDOPSIS THALIANA EXPANSIN 5 (ATEXP5); (ATHEXP ALPHA 1.4);EXPANSIN 5 (EXP5);EXPANSIN A5 (EXPA5)	Encodes an expansin. Naming convention from the Expansin Working Group (Kende et al, 2004. Plant Mol Bio)		23.6926	23.1136	23.8265	24.5603	19.9918	24.477	0.53452	0.421234	2	2	2	22	22	22	3.1221	10650000	12671000	18866000	0	0	0	14444000	11577000	18596000	0	0	0	3	SIVVTATNFCPPGGACDPPNHHFDLSQPIYEK;SVVSFNVAPPTWSFGQTYTGGQFR
AT3G29075	AT3G29075.1	0	0	glycine-rich protein;(source:Araport11)		22.6769	19.6301	22.4437	28.6645	28.6112	28.7241	-7.08309	2.03423	3	3	3	12.9	12.9	12.9	31.009	5267600	0	0	63902000	67676000	85133000	48643000	0	0	258130000	204190000	178210000	15	PGPVGSGSDFGR;PNFSSNHDSSAYDDQALK;TEYSSYAR
AT5G23210	AT5G23210.4;AT5G23210.2;AT5G23210.5;AT5G23210.3;AT5G23210.1	SERINE CARBOXYPEPTIDASE-LIKE 34 (SCPL34)	SERINE CARBOXYPEPTIDASE-LIKE 34 (SCPL34)	serine carboxypeptidase-like 34;(source:Araport11)		25.3599	24.8601	25.0273	22.4616	23.2988	22.303	2.39464	2.45726	3	3	3	9.9	9.9	9.9	10.613	33828000	42518000	43367000	0	1703100	0	23871000	22202000	17955000	0	17045000	0	9	ECNDALDEYFDVYK;IVQDWTPWYTK;VWVFSGDTDGR
AT1G70830	AT1G70830.5;AT1G70830.3;AT1G70830.4;AT1G70830.1;AT1G70830.2	MLP-LIKE PROTEIN 28 (MLP28)	MLP-LIKE PROTEIN 28 (MLP28)	MLP-like protein 28;(source:Araport11)		23.9225	23.7026	24.0033	20.0423	19.7884	24.6209	2.39225	0.874735	4	2	2	23.1	12.7	12.7	22.306	12490000	19060000	21326000	0	0	4953400	19482000	17588000	19824000	0	0	21040000	7	EIDEHLLAEE;IEAVEPDKNLITFR;LETDVEIK;VIEGDLMK
AT3G32980	AT3G32980.1;AT3G49120.1	PEROXIDASE 32 (PRX32)	PEROXIDASE 32 (PRX32)	N-glycosylation client involved in salt stress response.		21.5948	24.3418	18.9456	25.2629	25.8502	25.8914	-4.04074	1.223	2	2	2	9.4	9.4	9.4	10.944	0	29685000	0	6046500	0	11950000	0	18414000	0	44161000	0	54039000	4	TPTVFDNK;TVSCADILTIAAQQAVNLAGGPSWR
AT3G42050	AT3G42050.1	(VHA-H)	(VHA-H)	Member of V-ATPase family. Vacuolar-type H + -ATPase (V-ATPase) is a multisubunit proton pump located on the endomembranes.		25.7349	25.5248	25.5709	25.3195	25.8927	24.668	0.316807	0.63244	4	4	4	14.5	14.5	14.5	70.109	43869000	67398000	63211000	6288600	10282000	5117600	27895000	23897000	22514000	35250000	43096000	19648000	20	ENVTCFEENDFQILR;GNWFIQEK;LFHDESLANEDTYEPFLR;TQAWSDEDLLDALNQLEEGLKDK
AT4G33865	AT4G33865.1;AT3G44010.2;AT3G44010.1;AT3G43980.1;AT4G33885.1	RIBOSOMAL PROTEIN US14X (US14X)	RIBOSOMAL PROTEIN US14X (US14X)	Ribosomal protein S14p/S29e family protein;(source:Araport11)		25.7812	25.8535	25.796	25.2617	24.9785	24.6209	0.856524	1.67684	2	2	2	37.5	37.5	37.5	5.5356	45298000	84644000	73884000	6041600	5455900	4953300	44549000	51059000	44997000	36158000	20692000	20304000	6	GHSNVWNSHPK;VCGNSHGLIR
AT2G33800	AT2G33800.1	SCABRA 1 (SCA1)	SCABRA 1 (SCA1);EMBRYO DEFECTIVE 3113 (EMB3113);PLASTID RIBOSOMAL PROTEIN OF THE 30S SUBUNIT 5 (PRPS5);RIBOSOMAL PROTEIN US5C (US5C);RIBOSOMAL PROTEIN S5 (RPS5)	Encodes SCABRA1 (SCA1), a nuclear gene encoding a plastid-type ribosomal protein that functions &#8232;as a structural component of the 70S plastid ribosome. The sca1-rps5 allele exhibits defects in plastid 16SrRNA processing and a resulting decrease in accumulation of photosynthetic proteins. Loss-of-function mutations enhance the polarity defects of the as2 mutants.		29.8925	29.3881	29.9905	27.1712	27.743	27.2145	2.38086	3.39082	8	8	8	24.8	24.8	24.8	63.016	782940000	980920000	1352800000	22697000	37073000	29898000	260450000	169760000	271080000	71062000	69357000	49764000	63	AIVVVGDK;AKEVVAAVQK;IRDGFEER;IVLEMAGVENALGK;NIVQVPMTK;PASPGTGVIAGGAVR;VMLRPASPGTGVIAGGAVR;YSTFPHR
AT5G59850	AT5G59850.1;AT1G07770.3;AT1G07770.2;AT1G07770.1	RIBOSOMAL PROTEIN US8W (US8W)	RIBOSOMAL PROTEIN US8W (US8W)	Ribosomal protein S8 family protein;(source:Araport11)		32.188	31.8812	32.4534	29.806	30.2199	29.4147	2.36066	3.04811	8	8	3	56.2	56.2	23.1	84.402	3843499999.9999995	5522400000	7458099999.999999	140970000	206390000	137400000	2412900000	2237500000	3269799999.9999995	457750000	545770000	297280000	156	EIEGWTAR;FDVGVKEIEGWTAR;FLIVMQK;HGYIGEFEYVDDHR;ISVLNDALK;IVVELNGR;QFGYIVLTTSAGIMDHEEAR;QFGYIVLTTSAGIMDHEEARR
AT2G36130	AT2G36130.1	CYCLOPHILIN (CYCLOPHILIN)	CYCLOPHILIN (CYCLOPHILIN)	Cyclophilin-like peptidyl-prolyl cis-trans isomerase family protein;(source:Araport11)		24.009	24.7699	25.2158	22.3239	22.094	22.5349	2.34732	2.16806	2	2	2	18.9	18.9	18.9	7.6635	13262000	39941000	49420000	0	738840	0	19291000	23491000	28496000	0	5695100	0	5	DFIVQGGDPTGTGR;LGSVQTDNTDRPIHEVK
AT3G44590	AT3G44590.2;AT3G44590.1	RIBOSOMAL PROTEIN P2D (RPP2D)	RIBOSOMAL PROTEIN P2D (RPP2D);RIBOSOMAL PROTEIN P2W (P2W)	cytosolic ribosomal protein gene, part of bL12 family		22.4539	22.2025	21.7569	24.9138	24.3274	22.438	-1.7553	1.17058	2	1	1	24.3	9	9	-2	4513100	6738300	4494200	0	0	0	6795100	5320000	4426500	0	0	0	1	DIAELIASGR;KEEKEESDDDMGFSLFE
AT3G44890	AT3G44890.1	RIBOSOMAL PROTEIN L9 (RPL9)	RIBOSOMAL PROTEIN L9 (RPL9);RIBOSOMAL PROTEIN BL9C (BL9C)	Plastid ribosomal protein CL9 The mRNA is cell-to-cell mobile.		26.5044	26.3812	26.3709	28.2205	28.1541	27.7214	-1.61311	2.51198	5	5	5	27.4	27.4	27.4	30.833	74782000	122030000	110060000	46972000	49296000	42485000	49977000	54008000	53056000	98211000	91126000	58405000	27	ETGEYIAELK;LIFGSVTAQDLVDIIK;LVSLPEIR;QGQLLDVK;VILKEDVTDLGK
AT2G03820	AT2G03820.1	NONSENSE-MEDIATED MRNA DECAY 3 (NMD3)	(ATNMD3);NONSENSE-MEDIATED MRNA DECAY 3 (NMD3)	Encodes a protein involved in the nuclear export of the 60S ribosomal subunit and formation of the secondary cell wall.		23.927	23.6453	23.8343	21.5613	21.5181	21.2893	2.34598	4.71862	2	2	2	5	5	5	18.303	12529000	18318000	18968000	0	0	0	9635600	9855100	8292900	0	0	0	4	IQQVDQGIDFFFGNK;SEVDITEGLQK
AT3G45140	AT3G45140.1;AT3G45140.2	LIPOXYGENASE 2 (LOX2)	LIPOXYGENASE 2 (LOX2);ARABIODOPSIS THALIANA LIPOXYGENASE 2 (ATLOX2)	Chloroplast lipoxygenase required for wound-induced jasmonic acid accumulation in Arabidopsis.Mutants are resistant to Staphylococcus aureus and accumulate salicylic acid upon infection. The mRNA is cell-to-cell mobile.		24.4711	25.1809	24.6773	24.069	27.0345	25.526	-0.766698	0.631199	6	6	6	10	10	10	17.863	18269000	53106000	34024000	2643100	22687000	9275900	17748000	35059000	20459000	23933000	84011000	28315000	9	AVLAALPSIFPQIESVLLSPQEPFPHFK;GLDDIADIR;GYITAQEEFLEGITWSR;LQYLEGVIDER;SYLPSQTPEPLKK;YRKEELETLQGK
AT3G45780	AT3G45780.2;AT3G45780.1	PHOTOTROPIN 1 (PHOT1)	(JK224);NONPHOTOTROPIC HYPOCOTYL 1 (NPH1);PHOTOTROPIN 1 (PHOT1);ROOT PHOTOTROPISM 1 (RPT1)	Blue-light photoreceptor. Contains a light activated serine-threonine kinase domain and LOV1 and LOV2 repeats. Mutants are defective in blue-light response. Mediates blue light-induced growth enhancements. PHOT1 and PHOT2 mediate blue light-dependent activation of the plasma membrane H+-ATPase in guard cell protoplasts. PHOT1 undergoes blue-light-dependent autophosphorylation. At least eight phos…		24.264	24.0127	24.2809	24.5835	21.5347	24.3189	0.706854	0.565211	2	2	2	3.4	3.4	3.4	7.0473	15826000	0	25850000	0	0	0	15723000	0	15483000	0	0	0	5	DGTSFWNLLTIAPIKDESGK;FLQGSGTDADELAK
AT3G45980	AT3G45980.1;AT3G46030.1;AT1G07790.1;AT5G59910.1;AT2G28720.1;AT5G02570.1;AT2G37470.1	(HTB9)	HISTONE 2B (H2B); (HTB9);HISTONE H2B (H2B)	Encodes a histone 2B (H2B) protein. This protein can be ubiquitinated in planta, and this modification depends on the HUB1 and HUB2 E3 ubiquitin ligases as well as the UBC1 and UBC2 E2 ubiquitin conjugating enzymes. Lysine 146 appears to be the site of the ubiquitin addition.		22.7226	22.0739	19.6696	21.2963	20.3984	21.736	0.345104	0.421856	5	1	1	35.3	7.3	7.3	-2	5436900	6163600	1057600	386780	228100	670600	5436800	4495900	1897400	2941600	2099300	3205500	1	AMGIMNSFINDIFEK;EIQTAVR;KPAAEKPVEEK;LVLPGELAK;QVHPDIGISSK
AT1G57860	AT1G57860.1;AT1G57660.1;AT1G09690.1;AT1G09590.1	RIBOSOMAL PROTEIN EL21W (EL21W)	RIBOSOMAL PROTEIN EL21W (EL21W)	Translation protein SH3-like family protein;(source:Araport11)		31.3266	30.6925	31.1303	28.5504	28.5444	29.0494	2.33508	3.40248	7	7	7	34.1	34.1	34.1	75.372	2115499999.9999998	2422600000	2980899999.9999995	59039000	64613000	106660000	1792299999.9999998	1233300000	1616999999.9999998	282990000	228960000	318000000	77	AVGVEVNK;DLFARPFR;GPKPGFMVEGMTLETVTPIPYDVVNDLK;GPKPGFMVEGMTLETVTPIPYDVVNDLKGGY;PGFMVEGMTLETVTPIPYDVVNDLK;RAVGVEVNK;VGDYVDVK
AT5G15200	AT5G15200.1;AT5G15200.2	RIBOSOMAL PROTEIN US4Z (US4Z)	RIBOSOMAL PROTEIN US4Z (US4Z)	Ribosomal protein S4;(source:Araport11)		32.9715	32.5207	32.8917	30.5619	30.5827	30.2509	2.32947	3.87056	14	14	7	46	46	32.3	295.78	6615799999.999999	8602400000	10106000000	238050000	265400000	245300000	1949599999.9999998	1400600000	1877299999.9999998	317830000	278610000	210600000	290	DLLTLDEK;HIDFALTSPFGGGR;HIDFALTSPFGGGRPGR;IFEGEALLR;IFEGEALLRR;LDYVLALTVENFLER;LQTIVFK;LVGEYGLR;RIFEGEALLR;RLQTIVFK;VHVCYYR;VQYSLSR;YGLLDESQNK;YGLLDESQNKLDYVLALTVENFLER
AT3G46740	AT3G46740.1	TRANSLOCON AT THE OUTER ENVELOPE MEMBRANE OF CHLOROPLASTS 75-III (TOC75-III)	TRANSLOCON AT THE OUTER ENVELOPE MEMBRANE OF CHLOROPLASTS 75-III (TOC75-III);MODIFIER OF ARG1 1 (MAR1); (TOC75); (1-Mar)	Component of the translocon outer membrane (TOC) complex. Forms the outer envelope translocation channel (beta-barrel). Plays a role in preprotein conductance. Imported into chloroplast. Expressed in young dividing photosynthetic tissues. Knockout mutants are embryo lethal with arrested development at the two-cell stage. Knockout mutants have abnormal etioplasts.		26.1633	26.0697	26.112	25.3542	25.8833	25.3916	0.572024	1.42562	6	6	6	12.3	12.3	12.3	48.293	59037000	98332000	91979000	6441600	10215000	8450700	18522000	20990000	18845000	17389000	19808000	19012000	24	GGAPTLASFQPGGSVTFEHR;LEYVHPYLDGVYNPR;LGNVVEGNTQVPVVR;LLPSGGISADGPPTTLSGTGVDR;SAEVSTEWSIVPGR;TVFQVDQGLGIGSK
AT3G46780	AT3G46780.1	PLASTID TRANSCRIPTIONALLY ACTIVE 16 (PTAC16)	PLASTID TRANSCRIPTIONALLY ACTIVE 16 (PTAC16)	plastid transcriptionally active 16;(source:Araport11)		27.6881	27.9907	27.675	27.972	28.3687	28.2802	-0.422335	1.54228	13	13	13	36.1	36.1	36.1	130.18	169870000	372370000	271770000	39540000	57203000	62582000	45473000	63274000	44564000	68854000	92626000	66794000	49	ADAVGVTVDGLFNK;AGVPDLGAAQDLAR;AYNVVVSAEGSNSGSGSSSSEAYK;AYNVVVSAEGSNSGSGSSSSEAYKVPK;EAEAASLAEDAQQK;LGSQFATAIQNASETPK;LNAVQSPFQDAESIAK;SLIPVVTNPSTGLVFGNNR;SQPLTISDLIEK;TSLTEDFSPEK;VAQTDVAYTLIK;VVEVSTDPSAPSRPVDELFSVIPEDGR;VVEVSTDPSAPSRPVDELFSVIPEDGRR
AT3G47070	AT3G47070.1	0	0	thylakoid soluble phosphoprotein;(source:Araport11)		20.6405	24.477	24.2402	24.9412	25.1355	25.5707	-2.09654	0.936591	3	3	3	23	23	23	8.4643	1284100	32602000	25132000	4838000	6083400	9568200	5655500	13529000	9882800	21598000	23341000	28212000	10	KSEGGFGGLGSLFK;NSAPTPVPK;SEGGFGGLGSLFK
AT1G74050	AT1G74050.1;AT1G74060.1	RIBOSOMAL PROTEIN EL6X (EL6X)	RIBOSOMAL PROTEIN EL6X (EL6X)	Ribosomal protein L6 family protein;(source:Araport11)		30.4541	29.7402	30.7228	27.5272	28.3758	28.0386	2.32513	2.68952	16	16	8	52.4	52.4	29.2	142.53	1155500000	1252000000	2247400000	29050000	57487000	52935000	257870000	177160000	288670000	74295000	84500000	77998000	107	AIEAVPELK;ASITPGTVLIILAGR;AVDAALIK;FDDKYFGK;FYPAEDVK;INGVPLRR;KEIPQVK;KTEGEFFEAEKEEK;QLASGLLLVTGPFK;SKVDAPVEKPPK;TEGEFFEAEKEEK;TEGEFFEAEKEEKK;VDISGVTLDK;VDISGVTLDKFDDK;VDISGVTLDKFDDKYFGK;VNRNPDLIR
AT3G47470	AT3G47470.1	LIGHT-HARVESTING CHLOROPHYLL-PROTEIN COMPLEX I SUBUNIT A4 (LHCA4)	LIGHT-HARVESTING CHLOROPHYLL-PROTEIN COMPLEX I SUBUNIT A4 (LHCA4); (CAB4)	Encodes a chlorophyll a/b-binding protein that is more similar to the PSI Cab proteins than the PSII cab proteins. The predicted protein is about 20 amino acids shorter than most known Cab proteins.		30.512	29.5475	30.2333	29.6371	29.6784	29.9722	0.335011	0.737721	8	8	8	47.4	47.4	47.4	235.03	1202800000	1095500000	1600699999.9999998	125400000	141800000	202210000	420510000	212430000	325330000	246420000	189260000	211160000	152	GEVGYPGGIFNPLNFAPTQEAK;GEWLPGLASPDYLTGSLAGDNGFDPLGLAEDPENLK;IGIINVPEWYDAGK;KGEWLPGLASPDYLTGSLAGDNGFDPLGLAEDPENLK;LAMLAFLGFVVQHNVTGK;NPGSVNQDPIFK;WFVQAELVNGR;WQDIKNPGSVNQDPIFK
AT2G01250	AT2G01250.1;AT2G01250.2	(RPL7B)	RIBOSOMAL PROTEIN UL30Y (UL30Y); (RPL7B)	Cytosolic ribosomal 60S subunit protein.		32.2299	31.573	32.1644	29.5825	30.0151	29.4215	2.31605	3.22076	17	17	8	51.7	51.7	27.7	323.31	3956899999.9999995	4460000000	6104299999.999999	120740000	179080000	138050000	1314200000	1182700000	1130900000	323460000	295650000	296190000	205	EANNFLWPFQLK;EEEWALEK;ELISLKR;ENFINELIR;GGFYVDPEAK;GINAIDPK;IALTDNSIVEQALGK;KILQLLR;KREEEWALEK;LKGGFYVDPEAK;NHYVEGGDAGNR;NHYVEGGDAGNRENFINELIR;QIFNGVFLK;RNHYVEGGDAGNR;RVEPYVTYGFPNLK;VEPYVTYGFPNLK;VVVPESVLK
AT3G48000	AT3G48000.1	ALDEHYDE DEHYDROGENASE 2B4 (ALDH2B4)	ALDEHYDE DEHYDROGENASE 2B4 (ALDH2B4);ALDEHYDE DEHYDROGENASE 2 (ALDH2);ALDEHYDE DEHYDROGENASE 2A (ALDH2A)	Encodes a putative (NAD+) aldehyde dehydrogenase.		23.2103	23.6794	23.567	25.0201	24.554	25.9179	-1.67845	1.6961	5	5	5	13.9	13.9	13.9	10.11	7623700	18755000	15760000	5110100	4065200	12171000	9317800	17245000	12827000	14387000	19955000	16288000	5	FSDVDEVIK;SGIESNATLECGGDQIGDK;TGEVIAHVAEGDAEDINR;VILGLAANSNLKPVTLELGGK;VYDEFVEK
AT3G48420	AT3G48420.1	0	0	Phosphatase like protein, located in chloroplast, involved in response to H2O2.		22.8762	18.3952	21.8128	21.9863	23.7336	21.887	-1.50756	0.711151	2	2	2	7.8	7.8	7.8	9.6364	0	0	0	0	0	0	0	0	0	0	0	0	3	AVSAIVSCLLGPER;FDLAFCGSLLR
AT3G48690	AT3G48690.1	(CXE12)	ARABIDOPSIS THALIANA CARBOXYESTERASE 12 (AtCXE12); (CXE12)	Encodes a protein with carboxylesterase whose activity was tested using both pNA and 2,4-D-methyl.		24.6401	24.6814	25.0593	24.4619	24.28	24.0981	0.513599	1.68023	2	2	2	11.7	11.7	11.7	4.9909	20540000	37563000	44340000	3470600	3362100	0	24108000	26016000	32568000	20227000	17359000	0	7	DGTDDPLLNVVQSESVDLSGLGCGK;DVVYSADNNLSVR
AT5G63570	AT5G63570.2;AT3G48730.1;AT5G63570.1	GLUTAMATE-1-SEMIALDEHYDE-2,1-AMINOMUTASE (GSA1)	GLUTAMATE-1-SEMIALDEHYDE-2,1-AMINOMUTASE (GSA1)	Encodes a protein with homology to glutamate-1-semialdehyde 2,1-aminomutase catalyzing the conversion of glutamate-1-semialdehyde (GSA) into 5-amino levulinate. The expression of this gene was demonstrated to be light-induced. The mRNA is cell-to-cell mobile.		23.6757	24.251	23.5395	24.991	25.4712	25.5182	-1.5047	2.48642	2	2	2	9.5	9.5	9.5	13.93	10526000	27875000	15463000	5007900	7676700	9226300	11232000	22695000	14593000	31722000	33426000	27927000	6	AGSGVATLGLPDSPGVPK;LAYGGAQEYFGITPDLTTLGK
AT3G08510	AT3G08510.4;AT3G08510.3;AT3G08510.2;AT3G08510.1;AT3G55940.1	PHOSPHOLIPASE C 2 (PLC2)	PHOSPHOLIPASE C 2 (ATPLC2);PHOSPHOLIPASE C 2 (PLC2)	Phosphoinositide-specific phospholipase C (PI-PLC), catalyzes hydrolysis of phosphatidylinositol 4,5-bisphosphate into inositol 1,4,5-trisphosphate and diacylglycerol. It is involved in auxin biosynthesis and signaling, modulating development of both male and female gametophytes. It also regulates MAMP-triggered immunity by modulating ROS production.		25.6913	25.1586	25.1214	22.619	23.6286	22.7955	2.30944	2.51531	3	3	3	6	6	6	11.029	42564000	52291000	46289000	967430	2140500	0	20886000	24942000	24036000	11820000	16339000	0	10	EDAQSIINSASSLLHR;FLIDVQK;LSLSEEQLEK
AT3G48990	AT3G48990.1	ACYL-ACTIVATING ENZYME 3 (AAE3)	ACYL-ACTIVATING ENZYME 3 (AAE3)	Encodes an oxalyl-CoA synthetase and is required for oxalate degradation, for normal seed development, and for defense against an oxalate-producing fungal pathogen.		24.6245	25.2571	25.3164	25.9798	26.3127	24.7209	-0.605123	0.76455	5	5	5	16.5	16.5	16.5	62.597	20319000	55984000	52989000	9938800	13756000	5309000	14421000	15425000	16671000	35630000	36773000	50546000	18	GEIQEPNNKGEVCIR;HASHPETEYPK;ISPIEVDAVLLTHPDVSQGVAFGVPDEK;YGEEINCAVIPR;YNATWYTAVPTIHQIILDR
AT5G07090	AT5G07090.3;AT5G07090.2;AT2G17360.1;AT5G07090.1;AT2G17360.2	RIBOSOMAL PROTEIN ES4Y (ES4Y)	RIBOSOMAL PROTEIN ES4Y (ES4Y)	Ribosomal protein S4 (RPS4A) family protein;(source:Araport11)		33.4517	32.7596	33.1442	30.6167	31.0999	30.7594	2.29314	3.23362	18	18	3	64.8	64.8	10.7	323.31	9228500000	10152000000	12039000000	247270000	379850000	348970000	3600299999.9999995	2592600000	3238099999.9999995	502310000	605390000	468760000	323	ECLPLVLIIR;EVISILMQR;FDVGNVVMVTGGR;GIPYLNTYDGR;GSFETIHIQDSTGHEFATR;HKGSFETIHIQDSTGHEFATR;LDLEENK;LDLEENKIVEFIK;LGGAFAPKPSSGPHK;LGNVYTIGK;LHSIKDEEAK;LTIIEEAR;SIQFGQK;SRECLPLVLIIR;TIRYPDPLIKPNDTIK;TYPAGFMDVVSIPK;YPDPLIKPNDTIK;YPDPLIKPNDTIKLDLEENK
AT3G49720	AT3G49720.3;AT3G49720.2;AT3G49720.1	(CGR2)	(CGR2)	Encodes CGR2 (cotton Golgi-related 2). CGR2 and a close homologue CGR3 have overlapping roles in plant growth and pectin methylesterification in the Golgi apparatus.		26.2756	26.1686	26.2646	27.5276	27.5847	26.8144	-1.07261	1.6279	3	3	3	18.8	18.8	18.8	74.732	63815000	105310000	102240000	29058000	33221000	22657000	38409000	41978000	43637000	79485000	66630000	45245000	29	FFVQTNLEENDAPSK;SFSLVIVSDALDYLSPK;VASDGVVLFAGLPGQQR
AT1G33590	AT1G33590.1;AT1G33590.3;AT1G33590.2	0	0	Leucine-rich repeat (LRR) family protein;(source:Araport11)		23.8717	22.508	24.5343	20.9998	19.3319	23.7224	2.28664	0.980606	3	3	3	8.4	8.4	8.4	6.2861	12058000	0	30814000	0	0	2657300	8157700	0	16366000	0	0	14775000	8	FLELGHNK;LSGTLPANIGALSQLEAFSLEGNR;YVYIENNR
AT1G18450	AT1G18450.1	ACTIN-RELATED PROTEIN 4 (ARP4)	ACTIN-RELATED PROTEIN 4 (ATARP4);ACTIN-RELATED PROTEIN 4 (ARP4)	Encodes a gene similar to actin-related proteins in other organisms. Member of nuclear ARP family of genes. Component of chromatin remodeling complexes, involved in chromatin-mediated gene regulation. Phenotype of the arp4-1 mutant allele revealed partial sterility due to defects in anther development. Targeting the distinct, 3' UTR of AtARP4 transcripts with RNA interference caused a drastic red…		25.3236	25.208	25.3927	23.0044	22.2614	23.8027	2.28527	1.76616	2	2	2	10.2	10.2	10.2	44.888	32988000	54111000	55867000	0	0	2809400	29100000	30436000	33414000	0	0	21386000	11	AGEFQVEDVDIPDTTESYK;ATSLVVDCGGGSTTISPVHDGYVLQK
AT3G50820	AT3G50820.1	PHOTOSYSTEM II SUBUNIT O-2 (PSBO2)	PHOTOSYSTEM II SUBUNIT O-2 (PSBO2);PHOTOSYSTEM II SUBUNIT O-2 (PSBO-2);OXYGEN EVOLVING COMPLEX SUBUNIT 33 KDA (OEC33)	Encodes a protein which is an extrinsic subunit of photosystem II and which has been proposed to play a central role in stabilization of the catalytic manganese cluster. In <i>Arabidopsis thaliana</i> the PsbO proteins are encoded by two genes: <i>psbO1</i> and <i>psbO2</i>. PsbO2 is the minor isoform in the wild-type. Mutants defective in this gene have been shown to be affected in the dephospho…		25.9512	27.3565	26.1787	29.0083	29.5295	29.4471	-2.83287	2.15268	14	5	5	52.6	27.5	27.5	273.97	50964000	239910000	96331000	81098000	127900000	140520000	33408000	83274000	41905000	208750000	326470000	256460000	46	EEDGIDYAAVTVQLPGGER;FKEEDGIDYAAVTVQLPGGER;FLVPSYR;GGSTGYDNAVALPAGGR;GGSTGYDNAVALPAGGRGDEEELSK;GSSFLDPK;GTGTANQCPTIDGGSETFSFK;LTYDEIQSK;LTYTLDEIEGPFEVGSDGSVK;NAPPDFQNTK;NTAASVGEITLK;QLEASGKPESFSGK;RLTYDEIQSK;SKPETGEVIGVFESLQPSDTDLGAK
AT3G51260	AT3G51260.1;AT3G51260.2;AT5G66140.1	20S PROTEASOME ALPHA SUBUNIT PAD1 (PAD1)	20S PROTEASOME ALPHA SUBUNIT PAD1 (PAD1)	20S proteosomal alpha subunits. Interacts with SnRK, SKP1/ASK1 during proteasomal binding of an SCF ubiquitin ligase.		24.0005	23.3111	23.8	22.6975	22.943	24.1736	0.432539	0.642344	2	2	2	11.6	11.6	11.6	7.4888	13184000	14530000	18523000	0	0	3632900	12522000	11779000	10795000	0	0	26510000	6	ALLEVVESGGK;QLEEEEIDIIVAEIEAEK
AT3G51800	AT3G51800.3;AT3G51800.1;AT3G51800.2	(ATG2)	(G2P); (ATG2);ERBB-3 BINDING PROTEIN 1 (EBP1);A. THALIANA ERBB-3 BINDING PROTEIN 1 (ATEBP1)	putative nuclear DNA-binding protein G2p (AtG2) mRNA,		24.1802	24.6763	23.9297	24.956	24.9581	24.6676	-0.598454	1.31987	2	2	2	14	14	14	14.649	14933000	37432000	20265000	4887900	5379300	0	9031900	10936000	10541000	31017000	29480000	0	7	KADVIAAANTAADVALR;VVLSVSSPETTVDEVEFEENEVYAIDIVASTGDGKPK
AT3G52090	AT3G52090.1;AT3G52090.2	(NRPB11)	(NRPB11)	Non-catalytic subunit common to nuclear DNA-dependent RNA polymerases II, IV and V; homologous to budding yeast RPB11 and the E. oli RNA polymerase alpha subunit.		24.0262	24.3705	22.3181	22.498	22.4036	23.2921	0.840342	0.796457	2	2	2	23.3	23.3	23.3	2.4982	0	0	0	0	0	0	0	0	0	0	0	0	1	DENVLFAGYQLPHPLK;IINAASFTVER
AT3G52300	AT3G52300.1;AT3G52300.2	ATP SYNTHASE D CHAIN, MITOCHONDRIAL (ATPQ)	ATP SYNTHASE D CHAIN, MITOCHONDRIAL (ATPQ); (ATPD)	ATP synthase D chain;(source:Araport11)		22.3222	23.7979	22.7191	24.9699	24.8611	25.3522	-2.11466	1.81752	2	2	2	13.7	13.7	13.7	3.0511	4119300	20361000	8756500	4935300	5029700	8223100	10421000	17994000	12022000	23139000	21708000	24719000	1	FDALLVELK;FSQEPEPIDWDYYR
AT4G27090	AT4G27090.1	(RPL14B)	(RPL14B);RIBOSOMAL PROTEIN EL14Y (EL14Y)	Cytoplasmic ribosomal protein.Essential gene as homozygotes are lethal and heterozygotes have various defects in gametophyte development and function.		31.7826	31.5619	32.1794	29.6468	29.7687	29.2603	2.28268	3.43379	7	7	3	47	47	20.9	162.21	2901900000	4425800000	6167899999.999999	126240000	150960000	123450000	1205800000	1043899999.9999999	1513599999.9999998	165000000	239500000	147700000	162	ALIEAMEK;ALVDAPDMER;ANLNDFDR;LSLTDIVIDINR;LVVIVDVVDQNR;RLSLTDIVIDINR;VALVNYGEDHGK
AT1G50920	AT1G50920.1	(NOG1-1)	(NOG1-1)	Putative GTPase involved in HA - and ABA-mediated signaling pathways, particularly during defense respnses to pathogens. Has paralog NOG1-2.		25.5861	24.8544	25.7392	23.0149	25.1693	21.1717	2.27459	1.03978	3	3	3	5.8	5.8	5.8	4.3302	39569000	42348000	71035000	0	0	0	22518000	12367000	33804000	0	0	0	3	LSAIIDEFPR;VAALGRMCTVLK;YQVIDTPGILDRPFEDR
AT3G52730	AT3G52730.1	0	0	ubiquinol-cytochrome C reductase UQCRX/QCR9-like family protein;(source:Araport11)		27.3386	26.6773	26.9421	26.8602	27.0934	26.3679	0.212206	0.600453	2	2	2	20.8	20.8	20.8	15.456	133330000	149830000	163520000	18296000	23633000	16626000	119460000	80957000	88730000	69209000	70397000	40134000	17	RYEDISVLGQRPVEE;YEDISVLGQRPVEE
AT3G52880	AT3G52880.1;AT3G52880.2	MONODEHYDROASCORBATE REDUCTASE 1 (MDAR1)	MONODEHYDROASCORBATE REDUCTASE 1 (MDAR1);MONODEHYDROASCORBATE REDUCTASE 1 (ATMDAR1)	Encodes a peroxisomal monodehydroascorbate reductase, involved in the ascorbate-glutathione cycle which removes toxic H2O2		25.6959	26.3522	25.9363	26.3604	26.6523	26.8013	-0.609879	1.48057	8	8	8	28.8	28.8	28.8	93.005	42698000	119600000	81430000	12939000	17408000	22452000	12500000	36076000	21060000	26189000	54939000	52834000	21	ARPSAESLDELVK;EAVAPYERPALSK;EFANQGVQPGELAVISK;EIDDADKLVEAIK;LPGFHCCVGSGGEK;SFDLSWQFYGDNVGDSVLFGDSNPSNPKPR;SLVSATGDVFK;YQTLIIATGSTVLR
AT3G52930	AT3G52930.1	FRUCTOSE-BISPHOSPHATE ALDOLASE 8 (FBA8)	FRUCTOSE-BISPHOSPHATE ALDOLASE 8 (FBA8); (ATFBA8)	Fructose 1,6-biphosphate aldolase.		31.251	31.5885	31.6417	30.6159	30.9376	30.1935	0.911399	1.79932	21	21	14	76.3	76.3	48.9	323.31	2007599999.9999998	4508200000	4249099999.9999995	247140000	339430000	235730000	539680000	668410000	605530000	222450000	286990000	163900000	292	AAQEALYVR;ALQQSTLK;ALSDHHVLLEGTLLKPNMVTPGSDSPK;ANSEATLGTYK;ELLFTAPGALPCLSGVILFEETLYQK;FADELIANAAYIGTPGK;GILAADESTGTIGK;GILAADESTGTIGKR;GTVELAGTDGETTTQGLDGLGDR;IGENEPSEHSIHENAYGLAR;KYYEAGAR;LASINVENVETNR;LASINVENVETNRR;LFVDILK;LGDGAAESLHVK;RLASINVENVETNR;TVPAAVPAIVFLSGGQSEEEATR;TWAGKEENVK;VDKGTVELAGTDGETTTQGLDGLGDR;VSPEVIAEHTVR;YAVICQENGLVPIVEPEILVDGSHDIQK
AT3G52960	AT3G52960.1	PEROXIREDOXIN-II-E (PRXIIE)	PEROXIREDOXIN-II-E (PRXIIE)	Plastid localized peroxiredoxin.		24.5127	25.189	25.4262	27.6407	27.8984	27.0878	-2.49967	2.90345	5	5	5	32.9	32.9	32.9	32.755	18804000	53403000	57178000	31428000	41290000	27385000	14974000	28671000	18686000	118020000	97797000	72759000	17	DLGINDEVMLLSDGNGEFTGK;LGVELDLR;LPDSTLSYLDPSTGDVK;VLNLEEGGAFTNSSAEDMLK;YAILADDGVVK
AT3G52990	AT3G52990.2;AT3G52990.1	0	0	Pyruvate kinase family protein;(source:Araport11)		23.0975	23.1352	21.7148	24.1367	25.6995	24.5152	-2.13468	1.79139	3	1	1	12.4	5.1	5.1	5.615	7050300	0	0	2770100	0	4603600	12486000	0	0	17185000	0	16939000	1	AEATDVANAVLDGSDAILLGAETLR;IENVEGLTHFDEILQEADGIILSR;WSFSGAFEAR
AT2G25450	AT2G25450.1	GLUCOSINOLATE HYDROXYLASE (GSL-OH)	GLUCOSINOLATE HYDROXYLASE (GSL-OH)	Encodes a 2-oxoacid-dependent dioxygenase involved in the production of 2-hydroxybut-3-enyl glucosinolate.		25.3113	23.6071	23.8347	22.3063	21.7532	21.8836	2.26997	1.68741	3	3	3	5.6	5.6	5.6	9.0009	32706000	17839000	18974000	778920	583410	742860	16069000	9412200	14862000	4584800	3235700	3261100	17	ELLSELNPPK;FHDQDPEVR;RFHDQDPEVR
AT3G53420	AT3G53420.1;AT3G53420.2	PLASMA MEMBRANE INTRINSIC PROTEIN 2A (PIP2A)	PLASMA MEMBRANE INTRINSIC PROTEIN 2;1 (PIP2;1);PLASMA MEMBRANE INTRINSIC PROTEIN 2 (PIP2);PLASMA MEMBRANE INTRINSIC PROTEIN 2A (PIP2A); (ATPIP2;1)	a member of the plasma membrane intrinsic protein subfamily PIP2. localizes to the plasma membrane and exhibits water transport activity in Xenopus oocyte. expressed specifically in the vascular bundles and protein level increases slightly during leaf dev. When expressed in yeast cells can conduct hydrogen peroxide into those cells.		28.4514	28.067	28.3232	28.6655	28.9115	28.8743	-0.53656	1.96197	8	8	6	37.3	37.3	21.6	59.631	288340000	392590000	425910000	63944000	83334000	94473000	217780000	160910000	196310000	110240000	137490000	125250000	45	AFQSSYYTR;AKDVEAVPGEGFQTR;ALLYIIAQCLGAICGVGFVK;DSHVPVLAPLPIGFAVFMVHLATIPITGTGINPAR;DVEAVPGEGFQTR;DYQDPPPAPFIDGAELK;DYQDPPPAPFIDGAELKK;SFGAAVIYNK
AT3G53430	AT3G53430.1	RIBOSOMAL PROTEIN UL11Y (UL11Y)	RIBOSOMAL PROTEIN UL11Y (UL11Y)	Ribosomal protein L11 family protein;(source:Araport11)		28.7555	28.3572	28.6292	28.6709	28.7091	27.9835	0.126149	0.477928	6	6	1	47	47	9.6	91.903	356010000	480060000	526550000	64186000	72426000	50950000	189650000	158390000	181240000	226980000	255790000	146280000	59	DLQQEIQEGEIEIPEN;EILGTCVSVGCTVDGK;EILGTCVSVGCTVDGKDPK;HNGNISFDDVTEIAR;VTGGEVGAASSLAPK;VTVVPSAAALVIK
AT3G53520	AT3G53520.3;AT3G53520.2;AT3G53520.1;AT3G53520.4	UDP-GLUCURONIC ACID DECARBOXYLASE 1 (UXS1)	UDP-GLUCURONIC ACID DECARBOXYLASE 1 (UXS1)	Encodes a Golgi localized isoform of UDP-glucuronic acid decarboxylase. This enzyme produces UDP-xylose, which is a substrate for many cell wall carbohydrates including hemicellulose and pectin. UDP-xylose is also known to feedback regulate several cell wall biosynthetic enzymes.		23.1747	22.9721	23.0279	25.3943	25.7158	25.6047	-2.51337	4.39667	3	3	3	12.4	12.4	12.4	4.7071	7438200	11487000	10846000	6623300	9095300	9796300	14038000	12620000	13413000	19266000	14426000	16502000	3	ETYWGNVNPIGER;FLLTSTSEVYGDPLEHPQK;LGAAESTSLITR
ATCG00500	ATCG00500.1	ACETYL-COA CARBOXYLASE CARBOXYL TRANSFERASE SUBUNIT BETA (ACCD)	ACETYL-COA CARBOXYLASE CARBOXYL TRANSFERASE SUBUNIT BETA (ACCD)	Encodes the carboxytransferase beta subunit of the Acetyl-CoA carboxylase (ACCase) complex in plastids. This complex catalyzes the carboxylation of acetyl-CoA to produce malonyl-CoA, the first committed step in fatty acid synthesis.		24.8615	25.354	24.9052	21.2448	22.1528	24.9233	2.26659	1.05867	2	2	2	5.1	5.1	5.1	4.277	23947000	59872000	39846000	0	0	6108500	19845000	29574000	19747000	0	0	31424000	7	AVPEGSQAAESLLR;NFISDDTFFVR
AT2G33040	AT2G33040.1	GAMMA SUBUNIT OF MT ATP SYNTHASE (ATP3)	GAMMA SUBUNIT OF MT ATP SYNTHASE (ATP3)	gamma subunit of Mt ATP synthase;(source:Araport11)		27.6425	27.8467	27.2269	23.4668	25.8256	26.6781	2.24853	1.15613	12	12	12	45.2	45.2	45.2	74.928	164590000	336990000	199210000	1741200	9814800	20615000	68145000	79851000	56325000	45090000	19188000	40356000	52	DSKNDIVLSVTELNKNPLNYAQVSVLADDILK;EVQFVIVGEK;FHSVVAFLPTVSTVLSPEIIEK;FHSVVAFLPTVSTVLSPEIIEKESEIGGK;GLCGGINSTVVK;GLWQPFTALLGDNPSIDVK;LGELDSYEIEGGETK;NDIVLSVTELNK;NDIVLSVTELNKNPLNYAQVSVLADDILK;NPLNYAQVSVLADDILK;NVEFDALR;QASITTELIEIISGASALEAAK
ATCG01240	ATCG01240.1;ATCG00900.1	RIBOSOMAL PROTEIN S7 (RPS7.2)	RIBOSOMAL PROTEIN S7 (RPS7.2);RIBOSOMAL PROTEIN US7CY (US7CY)	30S chloroplast ribosomal protein S7		28.7586	29.095	29.0774	28.9192	25.5737	25.7027	2.24515	1.05683	4	4	4	23.9	23.9	23.9	30.751	356770000	800580000	718380000	76239000	8242000	10485000	380820000	325380000	426730000	114410000	46593000	47008000	24	LSSELVDAAK;LVNMLVNR;RVGGSTHQVPIEIGSTQGK;VGGSTHQVPIEIGSTQGK
AT3G54110	AT3G54110.1	PLANT UNCOUPLING MITOCHONDRIAL PROTEIN 1 (PUMP1)	ARABIDOPSIS THALIANA PLANT UNCOUPLING MITOCHONDRIAL PROTEIN 1 (ATPUMP1);UNCOUPLING PROTEIN 1 (UCP1); (UCP);ARABIDOPSIS THALIANA UNCOUPLING PROTEIN 1 (ATUCP1);PLANT UNCOUPLING MITOCHONDRIAL PROTEIN 1 (PUMP1)	Member of Uncoupling protein PUMP2 family. Encodes a mitochondrial uncoupling protein AtUCP1 involved in maintain the redox poise of the mitochondrial electron transport chain to facilitate photosynthetic metabolism. Disruption of UCP1 results in a photosynthetic phenotype. Specifically there is a restriction in photorespiration with a decrease in the rate of oxidation of photorespiratory glycine…		26.5676	26.3263	26.3364	26.1811	26.3939	25.9131	0.247385	0.968875	5	5	5	18.3	18.3	18.3	18.208	78129000	117470000	107460000	11427000	14553000	12131000	30235000	32827000	30119000	33518000	31350000	25584000	21	DFVGDVPLSK;GFIPNFGR;GLLGTVGTIAR;NAIINAAELASYDQVK;SALAGDVTLPK
AT3G49010	AT3G49010.7;AT3G49010.6;AT3G49010.3;AT3G49010.2;AT3G49010.1;AT3G49010.4;AT3G49010.5	BREAST BASIC CONSERVED 1 (BBC1)	BREAST BASIC CONSERVED 1 (BBC1);RIBOSOMAL PROTEIN EL13Z (EL13Z);40S RIBOSOMAL PROTEIN (RSU2);BREAST BASIC CONSERVED 1 (ATBBC1)	Encodes 60S ribosomal protein L13. Homolog of human breast basic conserved 1 (BBC1).		33.344	32.4736	33.1227	30.8363	31.1263	30.2542	2.24116	2.74374	10	10	5	36.4	36.4	24.3	199.27	8564899999.999999	8325999999.999999	11861000000	287920000	386860000	245860000	4791200000	2937999999.9999995	4482900000	863070000	669550000	561500000	176	AGDSTPEELANATQVQGDYLPIVR;GFTLEELK;HWQNYVK;KHWQNYVK;KLAPTIGIAVDHR;LAPTIGIAVDHR;SLEGLQTNVQR;TWFNQPAR;TWFNQPARK;VKAGDSTPEELANATQVQGDYLPIVR
AT3G54400	AT3G54400.1	0	0	Eukaryotic aspartyl protease family protein;(source:Araport11)		25.9204	26.291	26.2119	25.3911	26.8839	25.4942	0.218009	0.456859	2	2	2	9.2	9.2	9.2	41.67	49888000	114630000	98574000	6608800	20439000	9074000	42234000	58624000	52796000	38103000	62344000	25339000	21	IVDIPTSALAFDPATGAGTIFDSGTVYTR;TLQCEAPQCK
AT3G54470	AT3G54470.1	0	0	encodes the bi-functional orotate phosphoribosyltransferase/orotidine-5'-phosphate decarboxylase catalyzing the fifth and sixth step in the de novo pyrimidine ribonucleotide biosynthesis		23.8366	23.583	24.2284	24.5861	24.3524	24.1688	-0.486445	1.27353	2	2	2	10.1	10.1	10.1	24.599	11768000	17543000	24927000	3782500	3535000	0	15414000	13149000	17682000	18356000	16491000	0	4	DQTCLIIEDLVTSGASVLETAAPLR;ILEWADIINAHVISGPGIVDGLK
AT1G77940	AT1G77940.1	(RPL30B)	(RPL30B);RIBOSOMAL PROTEIN EL30Y (EL30Y)	Ribosomal protein L7Ae/L30e/S12e/Gadd45 family protein;(source:Araport11)		26.6115	26.6081	26.3781	23.924	24.6343	24.3321	2.2358	2.70665	4	3	3	42.9	28.6	28.6	23.034	80546000	142810000	110610000	2390400	4297800	4054700	52214000	59473000	49504000	6291300	27387000	22572000	15	LILISTNCPPLR;LILISTNCPPLRR;VGVHHYNGNNVDLGTACGK;VSCLSIVDPGDSDIIK
AT3G54600	AT3G54600.1	(DJ1F)	(DJ1F); (DJ-1F)	Glyoxalase I with low activity.		22.2517	21.5038	21.7146	25.0499	25.6749	23.7454	-3.00004	1.951	2	2	2	9	9	9	2.6587	0	4151600	4364400	0	0	2699900	0	4616400	5239700	0	0	8743800	2	ENHQTSLLFLIGDCVEDYSINVPFK;VAGGEIVESER
AT2G32080	AT2G32080.2;AT2G32080.1	PURIN-RICH ALPHA 1 (PUR ALPHA-1)	PURIN-RICH ALPHA 1 (PUR ALPHA-1)	similar to the conserved animal nuclear protein PUR alpha which was implicated in the control of gene transcription and DNA replication		26.2808	25.2032	25.0331	22.9952	23.334	23.56	2.20931	2.04605	6	6	6	36.9	36.9	36.9	39.257	64047000	53933000	43540000	1255700	1745100	2374300	47986000	27716000	23449000	7945000	8972900	9439500	15	AVTGGGGGGGGSDVELVSK;DKIEGMTGANVR;STIIVPAGSSPDEGWAAFR;STIIVPSSGISWFLDLFNYYVNSEEHELFSK;TIDSPGQEETGMTGVSK;VFYFDIGENRR
AT3G55360	AT3G55360.1	ECERIFERUM 10 (CER10)	ECERIFERUM 10 (CER10);ENOYL-COA REDUCTASE (ECR); (CER10); (ATTSC13); (TSC13);GLASSY HAIR 6 (GLH6)	Enoyl-CoA reductase is involved in all very long chain fatty acids (VLCFA) elongation reactions that are required for cuticular wax, storage lipid and sphingolipid metabolism. The protein is located in the ER, but in contrast to its yeast homolog TSC13 is not particularly enriched in the nuclear envelope-vacuole junction. Mutants in this gene show abnormal organ morphology and stem glossiness. Ce…		27.3742	27.182	27.5185	27.4012	27.9777	27.5937	-0.299346	0.962955	5	5	5	19	19	19	162.23	136660000	212580000	243820000	26621000	43625000	38888000	90302000	67739000	79919000	65744000	96072000	64859000	26	APLDLPDSATVADLQEAFHK;DPSGAGGYQIPR;EVLKAPLDLPDSATVADLQEAFHK;FSHATSPIGNVFR;LTLPVTPGSK
AT3G55410	AT3G55410.1;AT3G55410.2;AT5G65750.1	(E1-OGDH1)	(E1-OGDH1)	Encodes the E1 subunit of the 2-oxoglutarate dehydrogenase.		25.0911	24.3502	24.4589	23.2736	23.9289	23.7711	0.975538	1.77329	3	3	3	5.7	5.7	5.7	11.864	28077000	29858000	29245000	0	0	2748400	20781000	15730000	18280000	0	0	16970000	4	AWEADPNSVDESWDNFFR;FGHNEIDEPSFTQPK;QIFSEFSGGIRPVDEVGYTGTGDVK
AT3G55440	AT3G55440.1	TRIOSEPHOSPHATE ISOMERASE (TPI)	CYTOSOLIC TRIOSE PHOSPHATE ISOMERASE (ATCTIMC);TRIOSEPHOSPHATE ISOMERASE (TPI);CYTOSOLIC ISOFORM TRIOSE PHOSPHATE ISOMERASE (CYTOTPI)	Encodes triosephosphate isomerase.		28.174	28.7648	28.3686	29.8821	30.073	30.0706	-1.57275	2.49322	11	11	10	65.4	65.4	62.2	161.41	237910000	636800000	439520000	148610000	186410000	216480000	70210000	137870000	94873000	246230000	273290000	235080000	77	AILNESSEFVGDK;EAGSTMDVVAAQTK;ELGGQADVDGFLVGGASLKPEFIDIIK;FFVGGNWK;IIYGGSVNGGNCK;IVNTLNEAQVPSQDVVEVVVSPPYVFLPLVK;NVSADVAATTR;VASPAQAQEVHDELR;VASPAQAQEVHDELRK;VIACVGETLEER;VTNWSNVVIAYEPVWAIGTGK
AT5G47190	AT5G47190.1	PLASTID RIBOSOMAL PROTEINS OF THE 50S SUBUNIT 19 (PRPL19)	RIBOSOMAL PROTEIN BL19CY (BL19CY);PLASTID RIBOSOMAL PROTEINS OF THE 50S SUBUNIT 19 (PRPL19)	Ribosomal protein L19 family protein;(source:Araport11)		30.8433	30.8294	30.9256	27.9331	29.3942	28.6665	2.20149	1.76659	8	8	3	39.7	39.7	24	323.31	1513299999.9999998	2663800000	2586600000	38489000	116450000	81798000	811930000	881580000	959640000	194760000	280680000	116210000	98	AEESTEGETEAVVENAVETEAEGEGEATVAAEEAKPPWK;AIEVAETVRPVPGLR;IIAGIGVEIVFPIYSPNIK;KAIEVAETVRPVPGLR;LEVPENKR;RIIAGIGVEIVFPIYSPNIK;TGDIVEIK;TGDIVEIKLEVPENK
AT4G22010	AT4G22010.1	SKU5 SIMILAR 4 (sks4)	SKU5 SIMILAR 4 (sks4)	SKU5 similar 4;(source:Araport11)		27.2445	27.083	26.9117	24.3135	25.5817	24.7986	2.1818	1.96309	5	5	5	12.4	12.4	12.4	25.856	124910000	198480000	160110000	3131200	8288300	5602700	82032000	51819000	101220000	14500000	17428000	10885000	25	AAGAFGAIR;GWGGNTFTVQPGK;NLPNPDGVLINGR;VYTSSTSYRDEYPPPK;YAVNGASFVAPDTPLK
AT3G55800	AT3G55800.1	SEDOHEPTULOSE-BISPHOSPHATASE (SBPASE)	SEDOHEPTULOSE-BISPHOSPHATASE (SBPASE)	Encodes the chloroplast enzyme sedoheptulose-1,7-bisphosphatase (SBPase), involved in the carbon reduction of the Calvin cycle. Increase in SBPase activity in transgenic lines accumulate up to 50% more sucrose and starch than wild-type. The mRNA is cell-to-cell mobile.		26.2357	27.0319	26.0554	28.1616	28.19	28.3248	-1.78444	1.91206	8	8	8	29	29	29	156.63	62075000	191580000	88437000	45093000	50539000	64548000	46993000	72913000	43139000	132090000	110900000	111210000	39	ATFDNSEYSK;FEETLYGTSR;GFPGTHEFLLLDEGK;GIFTNVTSPTAK;LLFEVAPLGLLIENAGGFSSDGHK;LTGITGGDQVAAAMGIYGPR;TIINLDDR;YTGGMVPDVNQIIVK
AT3G56190	AT3G56190.1;AT3G56190.2;AT3G56450.1	ALPHA-SOLUBLE NSF ATTACHMENT PROTEIN 2 (ALPHA-SNAP2)	ALPHA-SOLUBLE NSF ATTACHMENT PROTEIN 2 (ALPHA-SNAP2); (ASNAP)	Encodes one of two alpha-SNAPs (soluble NSF attachment protein) in Arabidopsis		24.2935	23.243	22.3357	24.5532	22.479	24.6332	-0.597765	0.563689	2	2	2	7.6	7.6	7.6	3.5429	0	13860000	6712700	3697300	964840	4995900	0	9931800	7042000	11476000	9523400	11150000	2	YEDAADLLEK;YQDLDPTFTGTR
AT3G56240	AT3G56240.2;AT3G56240.3;AT3G56240.1	COPPER CHAPERONE (CCH)	COPPER CHAPERONE (CCH);HEAVY METAL ASSOCIATED PROTEIN 31 (ATHMP31)	CCH protein belongs to a family of eukaryotic proteins that participate in intracellular copper homeostasis by delivering this metal to the secretory pathway; mainly located along the vascular bundles of senescing leaves and petioles as well as in stem sieve elements; hypothesized to have a role in copper mobilization from decaying organs towards reproductive structures, as a result of metallopro…		23.1261	24.3909	23.6136	26.0884	26.0396	26.1347	-2.37738	1.94583	2	2	2	22.5	22.5	22.5	5.0518	7191600	30712000	16278000	10716000	11384000	14145000	12260000	27945000	13014000	43089000	33273000	32935000	8	MEGVESFDIDIK;TSYWPVEAEAEPK
AT4G31490	AT4G31490.3;AT4G31490.2;AT4G31490.1;AT4G31480.9;AT4G31480.8;AT4G31480.7;AT4G31480.5;AT4G31480.4;AT4G31480.2;AT4G31480.1;AT4G31480.6;AT4G31480.3	BETA2 COAT PROTEIN (beta2-COP)	BETA2 COAT PROTEIN (beta2-COP)	Required for plant growth, salt tolerance, and maintenance of the structure of the Golgi apparatus.		24.7139	24.5743	24.1218	22.8449	20.3727	23.7356	2.15227	1.09118	3	3	3	4.9	4.9	4.9	9.9207	21617000	34876000	23151000	0	0	0	27397000	26920000	17941000	0	0	0	8	ATGEFTKDENDANK;LVERPQNYSLAPER;TQTTHAQPDDLIDFFHLK
AT3G56490	AT3G56490.1	HIS TRIAD FAMILY PROTEIN 3 (HIT3)	HISTIDINE TRIAD NUCLEOTIDE-BINDING 1 (HINT1);HIS TRIAD FAMILY PROTEIN 3 (HIT3)	Encodes a protein that has adenylylsulfate sulfohydrolase activity (E.C. 3.6.2.1) in vitro.		21.5597	23.6111	22.0483	23.432	23.724	22.3752	-0.770698	0.737756	2	2	2	23.1	23.1	23.1	7.2346	2428200	17888000	5500400	0	0	0	8870700	8785800	10564000	0	0	0	3	EAALAATPSDSPTIFDK;EIPSTVVFEDDKVLAFR
AT2G45710	AT2G45710.1;AT3G61110.1;AT3G61111.2;AT3G61111.1	RIBOSOMAL PROTEIN ES27Z (ES27Z)	RIBOSOMAL PROTEIN ES27Z (ES27Z)	Zinc-binding ribosomal protein family protein;(source:Araport11)		30.0743	30.0527	29.9279	28.0764	27.6434	27.9005	2.14487	3.17545	4	4	3	46.4	46.4	31	105.11	888090000	1554799999.9999998	1295300000	42507000	34600000	48102000	480550000	503440000	451550000	116640000	78216000	81972000	73	LTEGCSFR;LVQSPNSFFMDVK;VLQNDIDLLNPPAELEK;VLQNDIDLLNPPAELEKR
AT3G57010	AT3G57010.1	0	0	Calcium-dependent phosphotriesterase superfamily protein;(source:Araport11)		26.9374	26.4078	26.681	26.9617	24.6221	26.8081	0.544806	0.562161	4	4	4	22.1	22.1	22.1	89.499	100960000	124300000	136450000	19629000	4261600	22559000	46348000	31419000	40304000	45130000	18788000	25955000	23	LSGETGEILEILEDSEGK;SGTNEVFATLPGSPDNIR;TIPLPVDGPESLEFDPQGEGPYVGVTDGR;VGPEGGLAELVVDEAEGR
AT2G31610	AT2G31610.1	RIBOSOMAL PROTEIN US3Z (US3Z)	RIBOSOMAL PROTEIN US3Z (US3Z)	Ribosomal protein S3 family protein;(source:Araport11)		33.4397	33.1454	33.425	31.2491	31.3759	30.9664	2.13955	3.96735	18	18	3	71.6	71.6	23.6	258.92	9152200000	13264000000	14626000000	383310000	459920000	402800000	3602899999.9999995	3110799999.9999995	3368999999.9999995	683110000	660190000	440990000	511	ACYGVLR;DDVVYSAPAQAAAPVTLVQEAPLTTVDYPEMIPPVA;DGYMVSSGQPTK;ELAEDGYSGVEVR;ELTSLVQK;EYIDAAVR;FKDGYMVSSGQPTK;FKFPVDSVELYAEK;FPVDSVELYAEK;FVADGVFYAELNEVLTR;FVMESGAK;GCEVIVSGK;GLCAIAQAESLR;IMLDWDPTGK;KFVADGVFYAELNEVLTR;RACYGVLR;TPLPDVVIIHAPK;TQNVLGEK
ATMG00480	ATMG00480.1;AT2G07707.1	(ORFB)	(ORFB);ATP SYNTHASE 8 (ATP8)	Encodes subunit 8 of the mitochondrial F(O) ATP synthase complex.		23.9267	24.0444	23.8961	23.2599	20.9709	21.2942	2.11407	1.31271	2	2	2	17.1	17.1	17.1	4.0306	12527000	24155000	19799000	0	0	0	17624000	21628000	17486000	0	0	0	4	KITLISCFGEISGSR;SKDPNSLEDLLR
AT3G57610	AT3G57610.1	ADENYLOSUCCINATE SYNTHASE (ADSS)	(ATPURA);ADENYLOSUCCINATE SYNTHASE (ADSS)	encoding adenylosuccinate synthetase (AdSS), the enzyme involved in the first step of the formation of the purine nucleotide AMP (conversion of IMP to adenylo-succinate)		23.5271	23.0145	23.9294	24.7168	25.0126	24.7123	-1.32354	1.8835	2	2	2	6.9	6.9	6.9	12.709	9496100	11830000	20261000	4141100	5586400	5277500	11062000	14827000	12653000	22913000	24731000	21407000	2	AHLLFDFHQEVDGLR;VGSGPFPTENLGTGGDLLR
AT3G54540	AT3G54540.2;AT3G54540.1	ATP-BINDING CASSETTE F4 (ABCF4)	GENERAL CONTROL NON-DEREPRESSIBLE 4 (GCN4);ATP-BINDING CASSETTE F4 (ABCF4);GENERAL CONTROL NON-DEREPRESSIBLE 4 (ATGCN4)	ABCF4 is one of five members of the ABCF gene family in Arabidopsis, which are homologs of the yeast ABCF protein GCN20. AT3G54540 is not a homolog of the yeast bZIP transcription factor GCN4.		25.339	24.0569	25.3733	21.9358	24.2368	22.2892	2.10246	1.40239	3	3	3	6.4	6.4	6.4	4.1138	33341000	24365000	55120000	0	0	0	16645000	19076000	20351000	0	0	0	4	ALFVQPTLLLLDEPTNHLDLR;ATQSFSGGWR;SALNAVVSANEELVK
AT3G58510	AT3G58510.3;AT3G58510.2;AT3G58510.1	RNA HELICASE 11 (RH11)	RNA HELICASE 11 (RH11)	DEA(D/H)-box RNA helicase family protein;(source:Araport11)		25.0525	23.6041	24.7399	23.3319	23.9406	23.8698	0.751424	0.95055	5	3	3	12.6	7	7	4.3321	27336000	17802000	35534000	1585700	2657200	2943100	20051000	13348000	18710000	14241000	17132000	16056000	5	FLALDEADR;GLDIPHVAHVVNFDLPNDIDDYVHR;VGSSTDLITQR;VVVAYGGTPIHQQLR;WAPPSSGGGGASGGGYR
AT3G58610	AT3G58610.3;AT3G58610.2;AT3G58610.1	0	0	Acetohydroxy acid isomeroreductase.		25.5819	26.1204	25.9392	27.4845	28.0228	27.3224	-1.72941	2.73577	7	7	7	21.7	21.7	21.7	32.721	39455000	101850000	81594000	28203000	45010000	32221000	22439000	44287000	29489000	64530000	91733000	99521000	18	DLISNFFSDPVHGAIEVCAQLRPTVDISVPADADFVRPELR;EINGAGINASFAVHQDVDGR;FDYILTQQALVAVDSGAAINR;HLPDAFK;SDIFGER;TISTQGMLAVYNSLSEEGKK;VSLAGYEEYIVR
AT3G59020	AT3G59020.1;AT3G59020.2	0	0	ARM repeat superfamily protein;(source:Araport11)		23.522	24.2502	24.2004	25.1637	22.4691	25.389	-0.349741	0.42668	3	3	3	3.8	3.8	3.8	17.057	9462600	27858000	24447000	5644900	0	0	9900400	11818000	10879000	10649000	0	0	7	GQVDQWVEPYLR;NQILVFVSQVPPILR;YNEASLENKPYR
AT3G12800	AT3G12800.1	SHORT-CHAIN DEHYDROGENASE-REDUCTASE B (SDRB)	SHORT-CHAIN DEHYDROGENASE-REDUCTASE B (SDRB); (DECR)	short-chain dehydrogenase-reductase B;(source:Araport11)		25.3433	25.0856	25.4715	23.2124	21.8049	24.5769	2.10206	1.23379	3	3	3	12.8	12.8	12.8	23.341	33441000	49710000	59004000	1459700	0	4804700	21601000	21461000	23592000	13031000	0	25655000	12	NLALEWGTDYDIR;QVLDDAVSALR;SLGIQAIGLEGDVR
AT3G59970	AT3G59970.3	METHYLENETETRAHYDROFOLATE REDUCTASE 1 (MTHFR1)	METHYLENETETRAHYDROFOLATE REDUCTASE 1 (MTHFR1)	methylenetetrahydrofolate reductase MTHFR1 mRNA, complete		27.9076	27.747	27.8669	27.5074	27.1426	27.6297	0.413916	1.32966	13	13	11	28.7	28.7	25.5	82.889	197790000	314480000	310430000	28654000	24453000	39870000	58886000	56442000	60111000	45907000	43122000	44906000	53	DKLDTLVEK;IDHALETIR;IPAELTAALEPIKDNDEAVK;LQQEWVVPLK;SDSPAIGWGGPGGYVYQK;SENWVSNTGESDVNAVTWGVFPAK;SIEDVQEK;SSPWSELDGLQPETK;SWANLYPEDDPSR;TEDGVENLFER;TKIPAELTAALEPIKDNDEAVK;VWKDEAFEIWSR;WGDSHSAAYSTLSDYQFAR
AT3G13580	AT3G13580.9;AT3G13580.8;AT3G13580.7;AT3G13580.6;AT3G13580.5;AT3G13580.4;AT3G13580.3;AT3G13580.2;AT3G13580.1	RIBOSOMAL PROTEIN UL30W (UL30W)	RIBOSOMAL PROTEIN UL30W (UL30W)	Ribosomal protein L30/L7 family protein;(source:Araport11)		29.0654	28.3769	28.9315	26.5909	27.3428	26.1423	2.09922	2.24262	14	3	3	48.4	13.9	13.9	68.504	441290000	486640000	649270000	15181000	28092000	14220000	345640000	265090000	342450000	34351000	92763000	41907000	43	EANNFLWPFQLK;ENFINELVR;GGFYVDPEAK;GINAIDPK;KILQLLR;KREEEWALAK;LKGGFYVDPEAK;NHYVEGGDAGNR;NHYVEGGDAGNRENFINELVR;QIFNGVFLK;RNHYVEGGDAGNR;RVEPYVTYGYPNLK;TALTDNSIVDQGLGK;TVVPESVLK
AT3G44320	AT3G44320.1	NITRILASE 3 (NIT3)	NITRILASE 3 (NIT3);NITRILASE 3 (AtNIT3)	This enzyme catalyzes the hydrolysis of indole-3-acetonitrile (IAN) to indole-3-acetic acid (IAA) (EC 3.5.5.1) and IAN to indole-3-acetamide (IAM) at lower levels. It is the only one of the four Arabidopsis nitrilases whose mRNA levels are strongly induced when plants experience sulphur deprivation. This enzyme likely participates in other non-auxin-related metabolic pathways.		25.7911	25.4263	25.4927	23.2389	23.9093	23.2658	2.09869	2.76034	4	2	2	17.1	6.4	6.4	67.461	45613000	62949000	59875000	1486700	2600300	1936300	50353000	46955000	39736000	6522100	9287900	5913600	9	CIWGQGDGSTIPVYDTPIGK;FGLAVGVHNEEGRDEFR;VTIVQSSTVYNDTPATLDK;VTIVQSSTVYNDTPATLDKAEK
AT3G60750	AT3G60750.1;AT3G60750.2	TRANSKETOLASE 1 (TKL1)	TRANSKETOLASE 1 (TKL1); (ATTKL1)	Transketolase involved in carbon fixation.		28.2762	29.2084	28.5339	29.8952	30.0323	30.4751	-1.46133	2.08455	16	16	13	38.1	38.1	33.6	242.42	255370000	866030000	492900000	149960000	181220000	286550000	71326000	135640000	86385000	199530000	208770000	250310000	103	AFGDFQK;ALPTYTPESPGDATR;ANSYSVHGAALGEK;EFGITVEAVVDAAK;FVLSAGHGCMLLYALLHLAGYDSVQEEDLK;GGYTISDDSSGNKPDVILIGTGSELEIAAQAAEVLR;HTPEGATLESDWSAK;KYPEEASELK;NGNTGYDEIR;NNLGWPYEPFQVPDDVK;NPYWFNR;SIGINSFGASAPAPLLYK;SIITGELPAGWEK;TPGHPENFETPGIEVTTGPLGQGIANAVGLALAEK;VTTTIGYGSPNK;VVSFVCWELFDEQSDEYKESVLPSDVSAR
AT1G79560	AT1G79560.3;AT1G79560.2;AT1G79560.1	FTSH PROTEASE 12 (FTSH12)	EMBRYO DEFECTIVE 156 (EMB156);FTSH PROTEASE 12 (FTSH12);EMBRYO DEFECTIVE 1047 (EMB1047);EMBRYO DEFECTIVE 36 (EMB36)	Encodes an FtsH protease that is localized to the chloroplast and is part of a membrane localized translocation motor complex .Strong interaction with TIC inner envelope protein translocon which consists of Tic20/Tic56/Tic100/Tic214(Ycf1)(DOI:10.1105/tpc.18.00357). Mutations in this locus result in embryo lethality.		25.5367	24.5315	25.8544	24.3494	22.3306	22.9804	2.08741	1.59123	7	7	7	11.8	11.8	11.8	13.884	38237000	33857000	76937000	0	0	0	16875000	9030000	15877000	0	0	0	9	ESGLPFVFASGAEFTDSEK;ETAVSVFYPR;FDWHAFSQLLPGGK;LSQDLGVSGEIGDSVGNWR;NAPAFVFVDEIDAIAGR;QAVIFICATNRPDELDLEFVR;SYIYQQDIVDVLDK
AT3G61220	AT3G61220.1;AT3G61220.2;AT3G61220.3	0	0	CytADR/SDR1 is an aldehyde reductase that catalyzes the reduction of the aldehyde carbonyl groups on alpha,beta-unsaturated aldehydes with more than 5 carbons in vitro. It can also act on menthone and neomenthol in vitro, but these do not represent likely endogenous activities of this enzyme in planta. GFP-tagged CytADR appears to localize to the cytosol where it likely plays a role in detoxifyin…		24.1498	23.8007	21.7139	27.556	28.0593	27.6806	-4.54381	1.93341	2	2	2	9.1	9.1	9.1	2.1379	14622000	20401000	4362300	29635000	46162000	41301000	21514000	19736000	9297800	0	0	0	2	IVNVSSSMGQLK;TGVLSVEEGASSPVR
AT3G61260	AT3G61260.1	REMORIN 1.2 (REM1.2)	REMORIN 1.2 (REM1.2)	Lipid raft regulatory protein, crucial for plasma membrane nanodomain assembly to control plasmodesmata aperture and functionality. Negatively regulates the cell-to-cell movement of TuMV via competition with PCaP1 for binding actin filaments.		27.8555	27.3587	27.7206	26.8595	26.8206	27.9464	0.436062	0.741148	5	5	5	36.3	36.3	36.3	20.161	190770000	240270000	280500000	18287000	19562000	49658000	88157000	56208000	69136000	43876000	31522000	67585000	32	IALESESPAK;IQNPPPEQIFDDSK;KIEEQLEK;RGEDVLKAEETAAK;VTTPAPADTPAPAPAEIPAPAPAPTPADVTK
AT3G61470	AT3G61470.1	PHOTOSYSTEM I LIGHT HARVESTING COMPLEX GENE 2 (LHCA2)	PHOTOSYSTEM I LIGHT HARVESTING COMPLEX GENE 2 (LHCA2)	Encodes a component of the light harvesting antenna complex of photosystem I. The mRNA is cell-to-cell mobile.		28.0492	27.6126	28.1098	28.672	28.3539	28.8111	-0.688474	1.82219	4	4	4	30.4	30.4	30.4	113.4	218180000	286520000	367340000	64232000	56621000	90421000	183040000	159020000	201250000	118130000	66383000	122540000	49	IGILNTPSWYTAGEQEYFTDK;LTGTDVGYPGGLWFDPLGWGSGSPAK;WADIIKPGSVNTDPVFPNNK;WNVQAEIVHCR
AT3G62030	AT3G62030.3;AT3G62030.1;AT3G62030.2	ROTAMASE CYP 4 (ROC4)	ROTAMASE CYP 4 (ROC4);CYCLOPHILIN 20-3 (CYP20-3)	nuclear-encoded chloroplast stromal cyclophilin CYP20-3 (also known as ROC4). Protein is tyrosine-phosphorylated and its phosphorylation state is modulated in response to ABA in Arabidopsis thaliana seeds.		23.5842	24.5087	23.9699	24.7921	25.6091	25.7446	-1.36106	1.85745	2	2	2	8.1	8.1	8.1	2.9653	9879100	33325000	20837000	4363200	8446900	10794000	0	17402000	11465000	0	0	0	1	FEDENFTLK;IVMGLFGEVVPK
AT3G62120	AT3G62120.3;AT3G62120.2;AT3G62120.1	PROLYL-TRNA SYNTHETASE CYTOSOLIC (PRORS-CYT)	PROLYL-TRNA SYNTHETASE CYTOSOLIC (PRORS-CYT); (ATPRORS-CYT)	Encodes a cytosolic prolyl-tRNA synthetase.		25.1726	25.2662	24.867	27.3888	25.9865	25.143	-1.07085	0.918527	6	6	6	15.9	15.9	15.9	17.975	29708000	56339000	38807000	26392000	10973000	7113400	13433000	14818000	13045000	82142000	31504000	19932000	9	AEEDLRDNYSPGWK;DLENDQVR;FAGGLYTTSVEAFIPNTGR;IYEEYLAVPVVK;KLILAPWCDEEEVER;VASVQVVVIPVPYK
AT3G62360	AT3G62360.2;AT3G62360.1	0	0	Carbohydrate-binding-like fold;(source:Araport11)		22.9928	21.696	21.834	28.6042	28.499	28.9149	-6.49843	2.98299	10	10	10	12.3	12.3	12.3	31.963	6557100	4743300	0	61286000	62612000	97167000	2807800	5079200	0	118860000	60465000	122360000	16	EYSFKPSTLAIELNSGESSEAVFEATR;GIEFVQK;IDVSNPQPIHLK;IGSANNQIER;LGLYIQGSVSPPLPGVNIK;SISPEAASDEDSWCWDR;SPLLNIEFSQAR;SSIDVNVGTEDIK;VALLSGQPQEGVAIEAR;VVDGNSVGVEGVK
AT3G60245	AT3G60245.1;AT3G10950.1	RIBOSOMAL PROTEIN EL43Y (EL43Y)	RIBOSOMAL PROTEIN EL43Y (EL43Y)	Zinc-binding ribosomal protein family protein;(source:Araport11)		26.5032	25.4131	26.25	23.6545	22.796	25.4605	2.08507	1.29298	2	2	2	25	25	25	29.412	74719000	62377000	101210000	1983100	0	0	46429000	26365000	57420000	20804000	0	0	8	AGGAYTMNTASAVTVR;LREQIEG
AT3G62830	AT3G62830.2;AT3G62830.1	(AUD1)	UDP-GLUCURONIC ACID DECARBOXYLASE 2 (UXS2); (ATUXS2); (AUD1)	Encodes a Golgi localized isoform of UDP-glucuronic acid decarboxylase. This enzyme produces UDP-xylose, which is a substrate for many cell wall carbohydrates including hemicellulose and pectin. UDP-xylose is also known to feedback regulate several cell wall biosynthetic enzymes.		24.0056	24.9702	24.8128	25.4522	25.3469	25.2554	-0.755256	1.21244	3	3	2	15.7	15.7	8.5	51.938	13231000	45889000	37376000	6894500	7043000	7689600	27816000	25803000	24604000	28996000	26730000	23145000	8	FLLTSTSEVYGDPLQHPQVETYWGNVNPIGVR;GDTVIVVDNFFTGR;VVQETIDPNANIEFRPNTEDDPHK
AT5G12110	AT5G12110.1	0	0	elongation factor 1-beta 1;(source:Araport11)		25.6743	25.8128	25.5749	23.6248	23.7827	23.4132	2.08043	3.93927	6	3	3	30.7	17.5	17.5	43.841	42063000	82293000	63385000	1942700	2381700	2144600	26996000	29815000	31376000	10809000	13062000	8463100	12	AVTFSDLHTER;KLEEAVR;LVPVGYGIK;TYISGDQLSVDDVK;VYAAVLENPGDGFPNASK;WYDSVASHLAK
AT1G52100	AT1G52100.4;AT1G52100.3;AT1G52100.5;AT1G52100.2;AT1G52100.1	0	0	Mannose-binding lectin superfamily protein;(source:Araport11)		24.0461	25.0898	25.8586	22.6993	22.7552	23.3012	2.07959	1.64669	4	4	4	16.6	16.6	16.6	13.262	13607000	49854000	77163000	0	0	0	19407000	15607000	20931000	0	0	0	7	FEYETYTSEVILAER;IPSIQSAIEGAK;LQGQGGDGGDSWDDGAFK;VGIQWDDGSDYHDVTK
AT3G63250	AT3G63250.1;AT3G63250.3;AT3G63250.2	HOMOCYSTEINE METHYLTRANSFERASE 2 (HMT2)	HOMOCYSTEINE METHYLTRANSFERASE-2 (ATHMT-2);HOMOCYSTEINE METHYLTRANSFERASE 2 (HMT2);HOMOCYSTEINE METHYLTRANSFERASE-2 (HMT-2)	Encodes a homocysteine methyltransferase (HMT). Among the three HMT coding genes in the genome, HMT2 is responsible for a significant proportion of HMT activity in the flower stalks and silique hulls. However, HMT2 does not significantly contribute to the total HMT activity in seeds.		23.7521	23.7066	23.919	24.1687	21.7925	24.5647	0.28393	0.412084	3	3	3	13.5	13.5	13.5	5.1089	11099000	19112000	20115000	0	0	0	10546000	10321000	10952000	0	0	0	2	FIEGLVLEIEK;IEAQAFADLLEEGDVK;QTGGYAVIDGGLATEFER
AT3G63410	AT3G63410.1	ALBINO OR PALE GREEN MUTANT 1 (APG1)	ALBINO OR PALE GREEN MUTANT 1 (APG1);VITAMIN E DEFECTIVE 3 (VTE3);INNER ENVELOPE PROTEIN 37 (IEP37); (E37)	Encodes a MPBQ/MSBQ methyltransferase located in the chloroplast inner envelope membrane. Mutant plants lack plastoquinone (PQ), suggesting that the APG1 protein is involved in the methylation step of PQ biosynthesis. The gene product is also involved in tocopherol (vitamin E) biosynthesis.		24.0607	22.8918	23.4461	24.9815	25.5611	24.8817	-1.67522	2.00981	2	2	2	7.1	7.1	7.1	30.822	13746000	10865000	0	4975100	8170400	5935000	12331000	26968000	0	26892000	38141000	21972000	7	EEEYIEWFK;YVSAGSIEYWPDPQR
AT3G63490	AT3G63490.1;AT3G63490.2	EMBRYO DEFECTIVE 3126 (EMB3126)	EMBRYO DEFECTIVE 3126 (EMB3126);PLASTID RIBOSOMAL PROTEIN L1 (PRPL1);PROLINE-RICH PROTEIN-LIKE 1 (PRPL1);RIBOSOMAL PROTEIN UL1C (UL1C)	Ribosomal protein L1p/L10e family;(source:Araport11)		27.8782	27.4842	27.5998	26.4584	27.8408	27.1199	0.514396	0.788007	8	8	8	27.2	27.2	27.2	107.14	193800000	262120000	257960000	13848000	39674000	28001000	97364000	97549000	77850000	59853000	146430000	78988000	39	AGTVTANIPQAIEEFKK;EYDVNTAISLLK;FVESVEAHFR;GTGQTVIVAVLAQGEK;GTGQTVIVAVLAQGEKVDEAK;SAGADIVGSDDLIEQIK;TGIVHIPFGK;YNDQQLR
AT5G16840	AT5G16840.3;AT5G16840.1;AT5G16840.2	BINDING PARTNER OF ACD11 1 (BPA1)	BINDING PARTNER OF ACD11 1 (BPA1)	Binds to ACD11 and fungal elicitor RxLR207. Regulates ROS mediated defense response.		24.5209	23.9453	23.9126	22.5424	20.3501	23.2522	2.07803	1.17288	2	2	2	8.6	8.6	8.6	15.514	18910000	22552000	0	0	0	0	17707000	17264000	0	0	0	0	7	AVDQNFQVTER;LTAGTSLVNEK
AT1G32500	AT1G32500.1	ATP-BINDING CASSETTE I7 (ABCI7)	ATP-BINDING CASSETTE I7 (ABCI7);NON-INTRINSIC ABC PROTEIN 6 (NAP6);NON-INTRINSIC ABC PROTEIN 6 (ATNAP6)	Encodes a member of a heterogenous group of non-intrinsic ATP-binding cassette (ABC) proteins. Members of this group bear no close resemblance to each other nor to representatives of specific ABC protein subfamilies from other organisms. This grouping is arbitrary and will likely change upon acquisition of further data.		23.4789	24.9271	23.2013	20.0529	23.8717	21.4539	2.07628	1.00916	3	3	3	8.6	8.6	8.6	6.6556	9183800	44539000	12231000	0	2533300	0	8779800	12887000	0	0	13148000	0	3	ALISSFGSEVIEK;ATVNIKPNLQIIADDVK;YSGLPDELTNR
AT4G00740	AT4G00740.2;AT4G00740.1	QUASIMODO 3 (QUA3)	QUASIMODO 3 (QUA3)	Encodes a Golgi-localized type II membrane pectin methyltransferase regulating cell wall biosynthesis in suspension cells.		21.4978	19.064	24.2108	26.5462	27.3231	27.1653	-5.42066	1.49306	3	3	3	6.7	6.7	6.7	13.119	2326300	0	0	14717000	27712000	28896000	4255200	0	0	74778000	34014000	74191000	7	HCPLPEETPLCLIPPPSGYK;NGLDVFEADAR;SQIQFALER
AT4G01050	AT4G01050.1;AT4G01050.2	0	0	hydroxyproline-rich glycoprotein family protein, contains a rhodanese homology domain. Required for anchoring the FNR flavoenzyme to the thylakoid membranes and sustaining high efficiency photosynthetic linear electron flow.The mRNA is cell-to-cell mobile.		24.6404	25.2203	21.794	24.3202	27.117	26.361	-2.04784	0.984501	3	3	3	7.5	7.5	7.5	6.4786	20544000	54574000	4611300	3145900	0	16547000	12550000	19889000	12187000	33139000	0	43786000	6	GWLNSSLPWIEPK;LGTDDNAQLLDIR;QVDEFLNTK
AT4G01150	AT4G01150.1	CURVATURE THYLAKOID 1A (CURT1A)	CURVATURE THYLAKOID 1A (CURT1A)	Integral thylakoid membrane protein required for proper grana stack curvature.		24.4339	24.7365	24.0446	27.4199	27.1603	27.3133	-2.89281	3.01972	4	4	4	18.9	18.9	18.9	7.2145	0	39027000	21945000	26968000	24754000	32019000	0	10975000	11522000	0	0	0	8	ASSEETSSIDTNELITDLK;ELAEDIESLK;ELAEDIESLKK;KELAEDIESLK
AT4G01310	AT4G01310.1	PLASTID RIBOSOMAL PROTEINS OF THE 50S SUBUNIT 5 (PRPL5)	PLASTID RIBOSOMAL PROTEINS OF THE 50S SUBUNIT 5 (PRPL5);RIBOSOMAL PROTEIN UL5C (UL5C)	Ribosomal L5P family protein;(source:Araport11)		27.5717	27.8072	27.5412	27.0568	27.5513	26.8783	0.477899	1.19752	5	5	5	24.8	24.8	24.8	52.078	156710000	327890000	247690000	20967000	32461000	23684000	82924000	109990000	90687000	57306000	76885000	45761000	27	DFQGVSPSSFDGNGNYSIGVK;DIALITGQKPIK;DQGVFPEIR;IVVNCGIGDAAQNDK;LINLALPR
AT4G01850	AT4G01850.2;AT4G01850.1	S-ADENOSYLMETHIONINE SYNTHETASE 2 (SAM-2)	S-ADENOSYLMETHIONINE SYNTHETASE 2 (SAM-2); (MAT2);S-ADENOSYLMETHIONINE SYNTHETASE 2 (SAM2); (AtSAM2); (SAMS2)	Encodes an S-adenosylmethionine synthase that catalyzes the formation of S-adenosylmethionine from methionine and ATP. Functions in ethylene biosynthetic pathway.		26.8619	27.1664	26.9109	26.7472	27.1201	26.7795	0.0974347	0.554081	15	4	4	51.1	19.8	19.8	27.74	95811000	210290000	160020000	16918000	24075000	22116000	57820000	88322000	59523000	47970000	60951000	51869000	21	ALVQVSYAIGVPEPLSVFVDTYGTGLIPDKEILK;DDPDFTWEVVKPLK;EHVIKPIIPEK;FVIGGPHGDAGLTGR;IIIDTYGGWGAHGGGAFSGK;IIIDTYGGWGAHGGGAFSGKDPTK;KIIIDTYGGWGAHGGGAFSGK;KIIIDTYGGWGAHGGGAFSGKDPTK;METFLFTSESVNEGHPDK;METFLFTSESVNEGHPDKLCDQISDAVLDACLEQDPDSK;SIGFISDDVGLDADK;TAAYGHFGR;TAAYGHFGRDDPDFTWEVVKPLK;TQVTVEYYNDNGAMVPVR;VHTVLISTQHDETVTNDEIAR
AT4G01870	AT4G01870.1;AT4G01870.2	0	0	tolB protein-like protein;(source:Araport11)		24.3667	23.1996	22.5461	24.8516	23.5162	24.6956	-0.983677	0.949469	3	3	3	8.6	8.6	8.6	15.278	16994000	13449000	7766600	4546700	1980100	5216600	13862000	13247000	9417500	14564000	12123000	19813000	9	FRGESTQGESIVPNIESIVSPIK;IQISGPEGSEEAAR;VDIPENFTEYTDFPITPIR
AT3G05060	AT3G05060.1	0	0	SAR DNA-binding protein, putative, strong similarity to SAR DNA-binding protein-1 (Pisum sativum) GI:3132696; contains Pfam profile PF01798: Putative snoRNA binding domain; encodes NOP58-like protein		25.5527	24.7286	26.1883	23.7147	22.122	24.4229	2.07003	1.43763	6	6	5	17.8	17.8	14.3	35.876	38665000	38813000	96974000	2067600	753300	4318200	22760000	12901000	25740000	14610000	6107500	12791000	15	ANCQGETLAVADSK;FDNTSEALEAVAK;LDFSEILADEIEADLK;MNTIAPNLTALVGELVGAR;TYNTAADSLLGETSAK;VDALGDSQDNTMGLENR
AT4G02450	AT4G02450.2;AT4G02450.1	(P23-1)	(P23-1)	Encodes one of two isoforms of a co-chaperone of HSP90 that is required for root growth, in particular in the maintenance of the root meristem.		22.8606	24.9018	24.956	25.6678	26.5247	26.9576	-2.14395	1.45884	3	3	3	15.8	15.8	15.8	10.067	5982700	43763000	41274000	8006000	15934000	25022000	7666500	18283000	16565000	55768000	78827000	54237000	14	LELADKVNVEESK;VGPENHVYELK;VNLDPEGVFDFSAK
AT4G02520	AT4G02520.1;AT2G02930.1	GLUTATHIONE S-TRANSFERASE PHI 2 (GSTF2)	(GST2);GLUTATHIONE S-TRANSFERASE PHI 2 (ATGSTF2); (ATPM24); (ATPM24.1);GLUTATHIONE S-TRANSFERASE PHI 2 (GSTF2)	Encodes glutathione transferase belonging to the phi class of GSTs. Naming convention according to Wagner et al. (2002). The expression of this gene is upregulated by herbicide safeners such as benoxacor and fenclorim.		26.2477	27.1011	26.5446	26.4538	26.976	27.084	-0.206796	0.559364	7	6	6	46.7	42.9	42.9	98.101	62593000	200980000	124140000	13804000	21786000	27313000	44397000	82263000	62774000	51646000	75268000	50800000	39	LAFEQIFK;NLDFELVHVELK;NPFGQVPAFEDGDLK;SIYGLTTDEAVVAEEEAK;VLDVYEAR;VNEWVAEITK;YLAGETFTLTDLHHIPAIQYLLGTPTKK
AT4G02530	AT4G02530.1;AT4G02530.2;AT4G02530.3	MAINTENANCE OF PHOTOSYSTEM II UNDER HIGH LIGHT 2 (MPH2)	MAINTENANCE OF PHOTOSYSTEM II UNDER HIGH LIGHT 2 (MPH2)	MPH2 is a green lineage-specific thylakoid lumen protein required for photosynthetic acclimation of PSII to stressful light conditions (PMID:28874535).		24.7462	24.1967	23.582	25.1155	25.45	25.3424	-1.12766	1.4653	2	2	2	14.4	14.4	14.4	28.145	0	26844000	15925000	5459300	7565000	8167700	0	16206000	12228000	33782000	38079000	34336000	4	LAFVSSAGAFEK;VGQAIENNDLPAAGLVLGK
AT4G02930	AT4G02930.1	0	0	GTP binding Elongation factor Tu family protein;(source:Araport11)		25.601	24.2205	23.3917	23.4207	25.7335	25.3377	-0.426232	0.467998	4	3	3	13.4	10.1	10.1	27.791	39981000	27291000	13957000	1686400	0	8141300	19499000	26583000	17704000	27673000	0	30610000	8	GSALSALQGTNDEIGR;HYAHVDCPGHADYVK;ILDNGQAGDNVGLLLR;LMDAVDEYIPDPVR
AT2G21580	AT2G21580.2;AT2G21580.1	RIBOSOMAL PROTEIN ES25Y (ES25Y)	RIBOSOMAL PROTEIN ES25Y (ES25Y)	Ribosomal protein S25 family protein;(source:Araport11)		27.8187	27.8431	28.1605	25.8172	26.1424	25.6569	2.06859	3.63481	4	4	1	45.8	45.8	13.1	53.178	185970000	336140000	380490000	8879300	12225000	10157000	124550000	161690000	184030000	46840000	59236000	38685000	38	DKVPPPSSKPAK;LITPSILSDR;MVSAHSSQQIYTR;VNNMVLFDQGTYDK
AT4G16990	AT4G16990.18;AT4G16990.11;AT4G16990.12;AT4G16990.7;AT4G16990.13;AT4G16990.2;AT4G16990.10;AT4G16990.17;AT4G16990.8;AT4G16990.6;AT4G16990.16;AT4G16990.1;AT4G16990.4;AT4G16990.15;AT4G16990.14;AT4G16990.19;AT4G16990.3;AT4G16990.5;AT4G16990.9	TIR-NBS16 (TN16)	TIR-NBS16 (TN16)	disease resistance protein (TIR-NBS class);(source:Araport11)		26.7267	26.1889	25.1342	23.8326	23.7131	24.3344	2.05659	1.77191	2	2	2	4.3	4.3	4.3	5.7794	87242000	106800000	46703000	2243700	2269600	4061100	56262000	103120000	43755000	15352000	13872000	18036000	8	VLIVLDDVDDIELLK;YVGSSFR
AT4G03520	AT4G03520.1;AT4G03520.2	(ATHM2)	(ATHM2);THIOREDOXIN M2 (TRXM2)	Encodes a redox activated co-chaperone, chloroplast localized thioredoxin, similar to prokaryotic types.		23.5888	25.848	25.0869	25.0248	25.1899	26.4477	-0.712949	0.667194	2	2	2	18.3	18.3	18.3	21.376	9910700	84323000	45194000	5126900	6317100	17572000	15626000	35335000	24175000	33262000	35395000	78081000	11	ATGPVVVDFWAPWCGPCK;LNTDESPNTPGQYGVR
AT4G04020	AT4G04020.1	FIBRILLIN (FIB)	FIBRILLIN (FIB);PLASTOGLOBULIN 35 (PGL35);FIBRILLIN 1A (FIB1A)	Fibrillin precursor protein. The fibrillin preprotein, but not the mature protein interacts with ABI2. Regulated by abscisic acid response regulators. Involved in abscisic acid-mediated photoprotection. The mRNA is cell-to-cell mobile.		24.8155	25.8514	24.93	25.1736	23.9932	25.1004	0.443205	0.668231	5	5	5	23.3	23.3	23.3	31.761	23195000	84520000	40538000	5683900	2755900	6906500	12375000	23601000	17814000	29901000	10632000	22071000	14	AIESVEETER;FEQGVIGTPQLTDSIEIPESVEVLGQK;GDGGSVYVLIK;GLLTSVQDTASSVAR;SLADSLYGTDR
AT4G04640	AT4G04640.1	(ATPC1)	(ATPC1)	One of two genes (with ATPC2) encoding the gamma subunit of Arabidopsis chloroplast ATP synthase.		29.959	29.5829	29.5245	28.7154	29.1893	28.8628	0.766287	2.06502	14	14	14	49.6	49.6	49.6	304.79	819860000	1122700000	979370000	66197000	101030000	93722000	219340000	194180000	187640000	178100000	218770000	173760000	120	ALQESLASELAAR;AQEAVVNGRPFSETLVEVLYNINEQLQTDDVDVPLTK;EAQAVADDVFSLFISEEVDKVELLYTK;GEICDINGTCVDAAEDEFFR;GLCGGFNNFIIK;KGNSYFLR;MSAMSSASDNASDLKK;PFSETLVEVLYNINEQLQTDDVDVPLTK;RAQEAVVNGRPFSETLVEVLYNINEQLQTDDVDVPLTK;RPYIPVDK;SEPVIHTLLPLSPK;SLSMVYNR;VALVVVTGDR;YLEAGTLPTAK
AT4G05180	AT4G05180.2;AT4G05180.1	PHOTOSYSTEM II SUBUNIT Q-2 (PSBQ-2)	PHOTOSYSTEM II SUBUNIT Q (PSBQ);PHOTOSYSTEM II SUBUNIT Q-2 (PSBQ-2); (PSII-Q)	Encodes the PsbQ subunit of the oxygen evolving complex of photosystem II.		25.3895	27.3368	26.2109	27.8917	28.3951	28.4944	-1.948	1.50396	5	4	4	30.4	26.1	26.1	73.815	34528000	236660000	98503000	37399000	58259000	72602000	28310000	85014000	44359000	85198000	233010000	114380000	30	AWPYVQNDLR;FYIQPLSPTEAAAR;LFQTIDNLDYAAR;VGGPPLPSGGLPGTDNSDQAR;YDLNTVISAKPK
AT4G05530	AT4G05530.1	INDOLE-3-BUTYRIC ACID RESPONSE 1 (IBR1)	INCREASED BOTRYTIS RESISTANCE 1 (IBR1);INDOLE-3-BUTYRIC ACID RESPONSE 1 (IBR1);SHORT-CHAIN DEHYDROGENASE/REDUCTASE A (SDRA)	Encodes a peroxisomal member of the short-chain dehydrogenase/reductase (SDR) family of enzymes. Loss of IBR1 function causes increased resistance to indole-3-butyric acid without affecting plant responses to IAA, NAA, and 2,4-D. This enzyme may be responsible for catalyzing a dehydrogenation step in the beta-oxidation-like conversion of IBA to IAA. The mRNA is cell-to-cell mobile.		24.3105	24.696	25.3674	33.4059	33.5613	32.2393	-8.27752	4.10978	3	3	3	33.9	33.9	33.9	4.6952	16344000	37946000	54895000	1709199999.9999998	2091899999.9999998	973360000	15033000	19160000	36283000	0	0	0	7	IDIVVCNAAANPSTDPILSSK;TLLNRLGTTGDMAAAAAFLASDDSSYITGETLVVAGGMPSR;VNAVAPGFVPTHFASFITGSSEVR
AT4G08870	AT4G08870.2;AT4G08870.1;AT4G08900.1	ARGININE AMIDOHYDROLASE 2 (ARGAH2)	ARGININE AMIDOHYDROLASE 2 (ARGAH2)	Encodes one of the two arginase in the genome. Gene expression is enhanced by methyl jasmonate treatment. It is involved in the defense response to B.cinerea.		21.1199	23.3935	22.8303	23.256	20.697	21.6542	0.578868	0.52416	2	2	2	14.4	14.4	14.4	5.9246	1790200	15384000	9458100	0	0	0	4758500	7357600	5365800	0	0	0	4	ATTALLGVPLGHNSSFLEGPALAPPHVR;VIDASLTLIR
AT4G09000	AT4G09000.1;AT4G09000.2	GENERAL REGULATORY FACTOR 1 (GRF1)	GENERAL REGULATORY FACTOR 1 (GRF1);GENERAL REGULATORY FACTOR1-G-BOX FACTOR 14-3-3 HOMOLOG ISOFORM CHI (GF14 CHI)	Encodes a 14-3-3 gene, designated GRF1 chi (for general regulatory factor1-G-box factor 14-3-3 homolog isoform chi). The major native forms of 14-3-3s are homo- and hetero-dimers, the biological functions of which are to interact physically with specific client proteins and thereby effect a change in the client. As a result, 14-3-3s are involved in a vast array of processes such as the response t…		25.3856	27.1592	26.0038	28.4031	28.2929	29.1854	-2.44429	1.91348	8	8	6	41.2	41.2	29.6	86.747	34436000	209250000	85330000	53312000	54276000	117210000	12745000	31961000	20676000	66914000	74029000	86128000	39	AAQDIANSELAPTHPIR;AVDKDELTVEER;DEFVYMAK;GNDDHVSLIR;IISSIEQKEESR;LLDTILVPAAASGDSK;QAFDEAIAELDTLGEESYK;SKIETELSDICDGILK
AT4G09010	AT4G09010.2;AT4G09010.1;AT4G09010.3	0	0	Encodes a thylakoid lumen protein that was initially believed to act as a microsomal ascorbate peroxidase APX4 but to date, no evidence of enzymatic activity has been found.		22.5708	23.8134	23.2625	24.4535	24.7823	23.5664	-1.05184	1.26503	3	3	3	19.4	19.4	19.4	16.2	4893900	20581000	12761000	3450400	4762100	2384800	7820900	12654000	10844000	18516000	20815000	11247000	5	AENEGLSDGLSLIEEVKK;ETVSQTDYEVDLITAFTK;GNLLYTAYGSAGQWGLFDR
AT1G52560	AT1G52560.2;AT1G52560.1	(HSP26.5)	(HSP26.5)	HSP20-like chaperones superfamily protein;(source:Araport11)		27.1584	27.3275	27.0668	25.773	25.4234	24.1872	2.05638	1.62438	6	6	6	26.2	26.2	26.2	62.367	117670000	235140000	178280000	8611400	7426700	3667200	93569000	52422000	55670000	21577000	17975000	10054000	23	AEEEKGSPEEDEYWSSK;GSPEEDEYWSSK;ITVNDGILTIK;NGVLNLVIPR;SYGYYNTSLSLPDDAK;SYGYYNTSLSLPDDAKVEDIK
AT4G09320	AT4G09320.1	(NDPK1)	(NDPK1); (ATNDK1);NUCLEOSIDE DIPHOSPHATE KINASE 1 (NDK1)	nucleoside diphosphate kinase type 1 (NDPK1) gene, complete The mRNA is cell-to-cell mobile.		25.3907	26.5198	25.7557	28.4166	28.1804	28.8585	-2.5964	2.58806	5	5	5	36.9	36.9	36.9	39.754	34557000	134330000	71851000	53810000	50203000	93441000	21947000	42900000	22790000	116180000	110230000	135270000	38	GDFAIDIGR;GLIGEVICR;HYEDLSSK;IIGATNPAASEPGTIR;NVIHGSDSVESAR
AT4G09650	AT4G09650.1	ATP SYNTHASE DELTA-SUBUNIT GENE (ATPD)	ATP SYNTHASE DELTA-SUBUNIT GENE (ATPD);PIGMENT DEFECTIVE 332 (PDE332)	Encodes the chloroplast ATPase delta-subunit. The mRNA is cell-to-cell mobile.		25.2918	26.1587	25.8888	28.1581	27.8313	28.4232	-2.35776	2.87431	6	6	6	25.6	25.6	25.6	39.44	32268000	104590000	78794000	44985000	39414000	69105000	75309000	118340000	88113000	88226000	110050000	83834000	24	INIVTEIVK;INIVTEIVKEFELVYNK;KQLEDIASQLELGEIQLAT;LTDTQLAEVR;QLEDIASQLELGEIQLAT;TVIDASLVAGFTIR
AT4G10250	AT4G10250.1	(ATHSP22.0)	(ATHSP22.0); (HSP22)	Columbia endomembrane-localized small heat shock protein		31.3424	30.954	30.9485	31.7008	31.9557	31.6963	-0.702648	2.12441	11	11	11	55.9	55.9	55.9	108.55	2138799999.9999998	2904000000	2628000000	524230000	687430000	668040000	1157100000	997690000	1008699999.9999999	1358400000	2129299999.9999998	1468399999.9999998	130	DEVKIEVEENGVLR;DTSVALSPAR;ETAEGHEIMLDIPGLK;ETAEGHEIMLDIPGLKK;IEVEENGVLR;ISSSESKEL;KDEVKIEVEENGVLR;LPDNVDMESVK;TSEGSLSSALETTPGSLLSDLWLDRFPDPFK;VDWKETAEGHEIMLDIPGLK;VVNIAAEEDQTAK
AT4G10320	AT4G10320.1	0	0	tRNA synthetase class I (I, L, M and V) family protein;(source:Araport11)		25.1148	25.2573	24.7401	25.0879	23.5386	23.8724	0.871116	1.00388	5	5	5	9.1	9.1	9.1	26.633	28542000	55993000	35538000	0	0	2948300	19263000	21491000	18324000	0	0	10603000	10	ITVSCIENVPVATVVLGEHLHLSVGDDLLSK;KGENLVVAVDDDGLFTER;KYEPLFDYFSDFSSEAFR;TPLSNFEAGQNYK;VVADDYVTDDSGTGIVHCAPAFGEDDYR
AT4G10340	AT4G10340.1	LIGHT HARVESTING COMPLEX OF PHOTOSYSTEM II 5 (LHCB5)	LIGHT HARVESTING COMPLEX OF PHOTOSYSTEM II 5 (LHCB5);CHLOROPHYLL PROTEIN 26 (CP26)	photosystem II encoding the light-harvesting chlorophyll a/b binding protein CP26 of the antenna system of the photosynthetic apparatus The mRNA is cell-to-cell mobile.		29.8387	29.6176	29.7383	30.061	29.1695	29.7467	0.0724442	0.392362	16	16	16	57.5	57.5	57.5	182.33	754250000	1150000000	1135800000	168220000	99655000	172950000	231160000	214200000	196520000	315760000	179350000	296660000	123	AVSETSDELAK;DPEQGALLK;HLSDPFGNNLLTVIAGTAER;IFLPDGLLDR;IFLPDGLLDRSEIPEYLNGEVAGDYGYDPFGLGK;ITNGLDFEDK;ITNGLDFEDKLHPGGPFDPLGLAK;ITNGLDFEDKLHPGGPFDPLGLAKDPEQGALLK;LHPGGPFDPLGLAK;LHPGGPFDPLGLAKDPEQGALLK;SEIPEYLNGEVAGDYGYDPFGLGK;TGALLLDGNTLNYFGK;WAMLGAAGFIIPEALNK;WYGPDRR;YGANCGPEAVWFK;YQAFELIHAR
[truncated: 379 more rows]

## Sheet: Sup. Data 2c
Supplementary Data 2c. GO-term analysis of UBP24 interacting partners
Analysis Type:	PANTHER Overrepresentation Test (Released 20240226)
[truncated: 129 more rows]
